# Supplementary material for: Unprecedented yet gradual nature of first millennium CE intercontinental crop plant dispersal revealed in ancient Negev desert refuse
Source: eLife. 2023 Nov 27;12:e85118. doi: 10.7554/eLife.85118 (PMC10846859; doi:10.7554/eLife.85118)
Supplement: Supplementary file 2. [file elife-85118-supp2.docx]

Supplementary Table 2. Presence/absence of domesticated species in Negev Highland middens by period (carpological remains)

| **Plants/centuries CE** | |  | **1st–3rd** | **4th–mid-5th** | **mid-5th–mid-6th** | **mid-6th–mid-7th** | **7th** | **mid-7th–8th** |
| --- | --- | --- | --- | --- | --- | --- | --- | --- |
| **Functional category** | **Latin name** | **Common name** |  |  |  |  |  |  |
| **Cereals** | *Hordeum vulgare* | Barley |  |  |  |  |  |  |
|  | *Triticum turgidum* s.l. | Free-threshing tetraploid wheat |  |  |  |  |  |  |
|  | *Triticum aestivum* | Free-threshing hexaploid wheat |  |  |  |  |  |  |
| **Legumes** | *Lens culinaris* | Lentil |  |  |  |  |  |  |
|  | *Vicia ervilia* | Bitter vetch |  |  |  |  |  |  |
|  | *Vicia faba* | Broad bean |  |  |  |  |  |  |
|  | *Lathyrus clymenum* | Spanish vetchling |  |  |  |  |  |  |
|  | *Lupinus albus* | White lupine |  |  |  |  |  |  |
|  | *Trigonella foenum-graecum* | Fenugreek |  |  |  |  |  |  |
| **Fruits** | *Vitis vinifera* | Grape |  |  |  |  |  |  |
|  | *Ficus carica* | Fig |  |  |  |  |  |  |
|  | *Olea europaea* | Olive |  |  |  |  |  |  |
|  | *Phoenix dactylifera* | Date |  |  |  |  |  |  |
|  | *Punica granatum* | Pomegranate |  |  |  |  |  |  |
|  | *Ceratonia siliqua* | Carob |  |  |  |  |  |  |
|  | *Prunus persica* | Peach |  |  |  |  |  |  |
|  | *Prunus* subgen*. Cerasus/Prunus* | Plum/cherry |  |  |  |  |  |  |
|  | *Ziziphus jujuba/mauritiana* | Jujube |  |  |  |  |  |  |
| **Nuts** | *Prunus amygdalus* | Almond |  |  |  |  |  |  |
|  | *Pinus pinea* | Stone pine |  |  |  |  |  |  |
|  | *Pistacia vera* | Pistachio |  |  |  |  |  |  |
|  | *Juglans regia* | Walnut |  |  |  |  |  |  |
| **Vegetable** | *Solanum melongena* | Aubergine |  |  |  |  |  |  |
| **Other** | *Vacchelia nilotica* | Nile acacia |  |  |  |  |  |  |
