# Supplementary material for: Unprecedented yet gradual nature of first millennium CE intercontinental crop plant dispersal revealed in ancient Negev desert refuse
Source: eLife. 2023 Nov 27;12:e85118. doi: 10.7554/eLife.85118 (PMC10846859; doi:10.7554/eLife.85118)
Supplement: Table 4—source data 1. [file elife-85118-table4-data1.xlsx]

## Sheet: Archaeobotanical finds
Lab #	Site	Excavator	Archaeobotanist	Year analyzed	Area	Square	Locus	Basket	Excavation Date	Flotation (Yes/No)	Sediment Volume (liter)*	Vial no.	מין הצמח	Plant Latin name	איבר	Organ	משפחה	Family	Calculated quantity	Quantity	Fraction size (mm)	Confirmed ID? Yes=כן	Charred? Yes=כן	Possibly recent? (רצנטי?)	Notes		ID notes	ID explanation
HLZ-1	Elusa	Bar-Oz, Gini and Weissbrod	Daniel Fuks, Yael Slasky	2015	A4	4	4/04a	37	2015-02-01	Bucket Floated		1	שעורה	Hordeum	גרגיר	grain	דגניים	Gramineae	12	12		כן	כן		במעבר נפל עובר מגרגיר.
HLZ-1	Elusa	Bar-Oz, Gini and Weissbrod	Daniel Fuks, Yael Slasky	2015	A4	4	4/04a	37	2015-02-01	Bucket Floated		2	חיטה	Triticum	גרגיר	grain	דגניים	Gramineae	3	3			כן		לבדוק שוב את הגרגר השלישי
HLZ-1	Elusa	Bar-Oz, Gini and Weissbrod	Daniel Fuks, Yael Slasky	2015	A4	4	4/04a	37	2015-02-01	Bucket Floated		3	דגני		גרגר	grain	דגניים	Gramineae	5	5		לא	כן			דגני גדול
HLZ-1	Elusa	Bar-Oz, Gini and Weissbrod	Daniel Fuks, Yael Slasky	2015	A4	4	4/04a	37	2015-02-01	Bucket Floated		4	זון	Lolium	גרגר	grain	דגניים	Gramineae	2	2		לא	כן			דגני קטן
HLZ-1	Elusa	Bar-Oz, Gini and Weissbrod	Daniel Fuks, Yael Slasky	2015	A4	4	4/04a	37	2015-02-01	Bucket Floated		5	דגני		גרגר	grain	דגניים	Gramineae	6	6		לא	כן		לבדוק שוב. מינים שונים	דגני קטן
HLZ-1	Elusa	Bar-Oz, Gini and Weissbrod	Daniel Fuks, Yael Slasky	2015	A4	4	4/04a	37	2015-02-01	Bucket Floated		6	שעורה	Hordeum	פרק ציר שיבולת	rachis fragment	דגניים	Gramineae	16	16		לא	כן			דגני קטן				שעורה, לרוב דו-טורית
HLZ-1	Elusa	Bar-Oz, Gini and Weissbrod	Daniel Fuks, Yael Slasky	2015	A4	4	4/04a	37	2015-02-01	Bucket Floated		7	גפן	Vitis vinifera	חרצן	pip	גפניים	Vitaceae	4	4		כן	כן		שלושה שלמים ושני שברירים*
HLZ-1	Elusa	Bar-Oz, Gini and Weissbrod	Daniel Fuks, Yael Slasky	2015	A4	4	4/04a	37	2015-02-01	Bucket Floated		8	גפן	Vitis vinifera	אנדוספרם	endosperm	גפניים	Vitaceae	5	5		חלק	לא			שניים לא ודאיים, יש עוד שברירים דומים אך בלתי מזוהים				השווה ל-HLZ שכבה 2
HLZ-1	Elusa	Bar-Oz, Gini and Weissbrod	Daniel Fuks, Yael Slasky	2015	A4	4	4/04a	37	2015-02-01	Bucket Floated		9	עדשה תרבותית	Lens culinaris	זרע	seed	פרפרניים	Fabaceae	2	2			כן		באישור יעל	אחד לא נספר ואחד רק שבר
HLZ-1	Elusa	Bar-Oz, Gini and Weissbrod	Daniel Fuks, Yael Slasky	2015	A4	4	4/04a	37	2015-02-01	Bucket Floated		10	cf. זית	cf. Olea europaea	שבר גלעין	pit fragment	זיתיים	Oleaceae	1	1		לא	כן		שבר
HLZ-1	Elusa	Bar-Oz, Gini and Weissbrod	Daniel Fuks, Yael Slasky	2015	A4	4	4/04a	37	2015-02-01	Bucket Floated		11	מתנן שעיר	Thymelaea hirsuta	אגוזית		מתנניים	Thymelaceae	5	5		כן	כן
HLZ-1	Elusa	Bar-Oz, Gini and Weissbrod	Daniel Fuks, Yael Slasky	2015	A4	4	4/04a	37	2015-02-15	Bucket Floated		12	מתנן שעיר	Thymelaea hirsuta	עלה מפוחם		מתנניים	Thymelaceae	91	91		כן	כן		אולי 88. שימו לב לעלה החצי מפוחם
HLZ-1	Elusa	Bar-Oz, Gini and Weissbrod	Daniel Fuks, Yael Slasky	2015	A4	4	4/04a	37	2015-02-15	Bucket Floated		13	מתנן שעיר	Thymelaea hirsuta	עלה לא מפוחם		מתנניים	Thymelaceae	130	130		כן	לא	רצנטי??	כ-4 נשברו תו"כ מעבר. איננו כולל את כל העלים מהמדגם, אולי 50%. מהשלמים ביותר.
HLZ-1	Elusa	Bar-Oz, Gini and Weissbrod	Daniel Fuks, Yael Slasky	2015	A4	4	4/04a	37	2015-02-01	Bucket Floated		14	דגן		פרק ציר שיבולת	rachis fragment	דגניים	Gramineae	29	29		לא	כן			דגני קטן				שעורה, לרוב דו-טורית
HLZ-1	Elusa	Bar-Oz, Gini and Weissbrod	Daniel Fuks, Yael Slasky, Yoel Melamed	2015	A4	4	4/04a	37	2015-02-01	Bucket Floated		15	אהל מצוי	Mesembryanthemum nodiflorum	זרע	seed	חיעדיים	Aizoaceae	72	72		כן		רצנטי??			יהיה פריך ובד"כ ריק-כדי לברר אם זה רצנטי יואל מציע לשבור אחד ולהרגיש אם הוא ישן	באזור הפנימי, כנראה האזור שמול הפסיגים, זה חלק לפני שמתייבש לגמרי. כשמתייבש הגבשושים בולטים וזה מה שיש לנו
HLZ-1	Elusa	Bar-Oz, Gini and Weissbrod	Daniel Fuks, Yael Slasky, Yoel Melamed	2015	A4	4	4/04a	37	2015-02-01	Bucket Floated		16	חיעד ספרדי	Aizoon hispanicum	זרע	seed	חיעדיים	Aizoaceae	13	13		כן	כן					רכסים צפןפים ועמוקים לעומת חיעד קנרי
HLZ-1	Elusa	Bar-Oz, Gini and Weissbrod	Daniel Fuks, Yael Slasky	2015	A4	4	4/04a	37	2015-02-01	Bucket Floated		17	תלתן?		זרע	seed	פרפרניים	Fabaceae	1	1		לא	כן		בכיוון של גרגרנית קטן	לבדוק שוב בהמשך	לא להתעסק בשלב זה
HLZ-1	Elusa	Bar-Oz, Gini and Weissbrod	Daniel Fuks, Yael Slasky, Yoel Melamed	2015	A4	4	4/04a	37	2015-02-01	Bucket Floated		18	שלמון?	Cephalaria?	זרע				1	1		לא	כן				להסתכל על השלמונים- שהעורקים דומים מבחינת הרווחים
HLZ-1	Elusa	Bar-Oz, Gini and Weissbrod	Daniel Fuks, Yael Slasky, Yoel Melamed	2015	A4	4	4/04a	37	2015-02-01	Bucket Floated		19	גלעינית זעירת-פרחים	Buglossoides tenuiflora	זרע		זיפניים	Boraginaceae	1	1		כן	מינרליזציה		בדוק-עמ' 62 במחברת		בסיס צר ביחס לזרע
HLZ-1	Elusa	Bar-Oz, Gini and Weissbrod	Daniel Fuks, Yael Slasky	2015	A4	4	4/04a	37	2015-02-01	Bucket Floated		20	חלמיתי	Malva	זרע		חלמיתיים	Malvaceae	2	2		לא	חלק	אחד לא מפוחם			דמוי חלמית, אחד מפוחם ואחד שדוף. לא ברור שהם מאותו המין
HLZ-1	Elusa	Bar-Oz, Gini and Weissbrod	Daniel Fuks, Yael Slasky	2015	A4	4	4/04a	37	2015-02-01	Bucket Floated		21	בלתי מזוהה+זחל						1	1		לא	כן				לא להתעסק בשלב זה
HLZ-1	Elusa	Bar-Oz, Gini and Weissbrod	Daniel Fuks, Yael Slasky	2015	A4	4	4/04a	37	2015-02-01	Bucket Floated		22	חרק		חרק שלם		פשפשים	Heteroptera	1	1		כן	לא	רצנטי??	פשפש רצנטי?
HLZ-1	Elusa	Bar-Oz, Gini and Weissbrod	Daniel Fuks, Yael Slasky, Yoel Melamed	2015	A4	4	4/04a	37	2015-02-01	Bucket Floated		23	בלתי מזוהה						1	1		לא	כן				לחפש בנוריתיים.
HLZ-1	Elusa	Bar-Oz, Gini and Weissbrod	Daniel Fuks, Yael Slasky	2015	A4	4	4/04a	37	2015-02-15	Bucket Floated		24	בלתי מזוהה		גזע סיבי				1	1		לא	כן
HLZ-1	Elusa	Bar-Oz, Gini and Weissbrod	Daniel Fuks, Yael Slasky	2015	A4	4	4/04a	37	2015-02-15	Bucket Floated		25	דגני		זרע		דגניים	Gramineae	1	1		לא	כן			דגני קטן
HLZ-1	Elusa	Bar-Oz, Gini and Weissbrod	Daniel Fuks, Yael Slasky, Yoel Melamed	2015	A4	4	4/04a	37	2015-02-01	Bucket Floated		26	בלתי מזוהה		חתיכת גבעול				1	1		לא	כן				לא סוככי. חתיכת גבעול. לא כדאי להתעסק
HLZ-1	Elusa	Bar-Oz, Gini and Weissbrod	Daniel Fuks, Yael Slasky, Yoel Melamed	2015	A4	4	4/04a	37	2015-02-01	Bucket Floated		27	דגני		מלענים				49	49		לא	לרוב	אחד לא מפוחם		יש חרק רצנטי, הרגנו במקפיא	מלענים?	להסתכל בדגנים בפלורא ולראות אם יש עוד מועמדים פוטנציאליים עם שיניים במלען
HLZ-1	Elusa	Bar-Oz, Gini and Weissbrod	Daniel Fuks, Yael Slasky	2015	A4	4	4/04a	37	2015-02-01	Bucket Floated		28	בלתי						7	7		לא	כן	אחד דגני? השוה ל3-37			לא להתעסק בשלב זה
HLZ-1	Elusa	Bar-Oz, Gini and Weissbrod	Daniel Fuks, Yael Slasky, Yoel Melamed	2015	A4	4	4/04a	37	2015-02-01	Bucket Floated		29	בלתי מזוהה						390	390		לא	כן	השוו ל 3-29. יש צורות/חלקי צמח שונים. קוצים, עלים			לא להתעסק בשלב זה
HLZ-1	Elusa	Bar-Oz, Gini and Weissbrod	Daniel Fuks, Yael Slasky	2015	A4	4	4/04a	37	2015-02-01	Bucket Floated		30	תאנה	Ficus carica	אגוזית שלמה	nutlet	תותיים	Moraceae	103	103		לרוב	לרוב	אחד לא מפוחם
HLZ-1	Elusa	Bar-Oz, Gini and Weissbrod	Daniel Fuks, Yael Slasky	2015	A4	4	4/04a	37	2015-02-01	Bucket Floated		31	תאנה	Ficus carica	אגוזית שבורה	nutlet	תותיים	Moraceae	13	13		לרוב
HLZ-1	Elusa	Bar-Oz, Gini and Weissbrod	Daniel Fuks, Yael Slasky	2015	A4	4	4/04a	37	2015-02-01	Bucket Floated		32	חרק		שלם - עכביש				1	1			לא	רצנטי?
HLZ-1	Elusa	Bar-Oz, Gini and Weissbrod	Daniel Fuks, Yael Slasky	2015	A4	4	4/04a	37	2015-02-01	Bucket Floated		33	חרק						2	2			חלק	אחד לא מפוחם
HLZ-1	Elusa	Bar-Oz, Gini and Weissbrod	Daniel Fuks, Yael Slasky, Yoel Melamed	2015	A4	4	4/04a	37	2015-02-01	Bucket Floated		34	דגני		גלומות				3	3		לא	כן	אחד כפול, אחד בודד, ואחד בודד וחצי			לא דגן כנראה מסייע לזיהו מבחנה 29
HLZ-1	Elusa	Bar-Oz, Gini and Weissbrod	Daniel Fuks, Yael Slasky, Yoel Melamed	2015	A4	4	4/04a	37	2015-02-01	Bucket Floated		35	בלתי מזוהה		זרע?	seed?			4	4		לא	כן	צורה אליפטית			יש מרקם שמזכיר דגני שעבר שריפה אבל לא שווה להתעסק
HLZ-1	Elusa	Bar-Oz, Gini and Weissbrod	Daniel Fuks, Yael Slasky, Yoel Melamed	2015	A4	4	4/04a	37	2015-02-01	Bucket Floated		36	בלתי מזוהה		זרע?	seed?			3	3		לא	כן				לא שווה להתעסק
HLZ-1	Elusa	Bar-Oz, Gini and Weissbrod	Daniel Fuks, Yael Slasky, Yoel Melamed	2015	A4	4	4/04a	37	2015-02-01	Bucket Floated		37	בלתי מזוהה		זרע?	seed?			15	15		לא	כן	דברים שונים
HLZ-1	Elusa	Bar-Oz, Gini and Weissbrod	Daniel Fuks, Yael Slasky, Yoel Melamed	2015	A4	4	4/04a	37	2015-02-01	Bucket Floated		38	בלתי מזוהה		זרע?	seed?			2	2		לא	לא	לא מפוחמים			לא רואה רמז שיכול לעזור. בקטן יש דגם שצריך לראות ולזכור
HLZ-1	Elusa	Bar-Oz, Gini and Weissbrod	Daniel Fuks, Yael Slasky	2015	A4	4	4/04a	37	2015-02-01	Bucket Floated		39	בלתי מזוהה		זרע?	seed?			12	12		לא	חלקית	שברירים	אולי זית
HLZ-1	Elusa	Bar-Oz, Gini and Weissbrod	Daniel Fuks, Yael Slasky	2015	A4	4	4/04a	37	2015-02-01	Bucket Floated		40	בלתי מזוהה		עלים?	leaves?			6	6		לא	חלקית
HLZ-1	Elusa	Bar-Oz, Gini and Weissbrod	Daniel Fuks, Yael Slasky, Yoel Melamed	2015	A4	4	4/04a	37	2015-02-15	Bucket Floated		41	מתנן שעיר	Thymelaea hirsuta	עלים על גזע	leaves on stem	מתנניים	Thymelaceae	3	3		לא					לא ודאי
HLZ-1	Elusa	Bar-Oz, Gini and Weissbrod	Daniel Fuks, Yael Slasky	2015	A4	4	4/04a	37	2015-02-15	Bucket Floated		42	בלתי מזוהה		זרע?	seed?	נוריתיים	Ranunculaceae	1	1	מרגנית?			שלם וקטן
HLZ-1	Elusa	Bar-Oz, Gini and Weissbrod	Daniel Fuks, Yael Slasky	2015	A4	4	4/04a	37	2015-02-01	Bucket Floated		43	בלתי מזוהה		זרע	seed	פרפרניים	Fabaceae	1	1			כן	שלם וקטן		להגדרה
HLZ-1	Elusa	Bar-Oz, Gini and Weissbrod	Daniel Fuks, Yael Slasky	2015	A4	4	4/04a	37	2015-02-01	Bucket Floated		44	בלתי מזוהה		עלים, קוצים, קליפות?	mixed			?	?				ערב רב של קטנים		0.3<X<0.5
HLZ-1	Elusa	Bar-Oz, Gini and Weissbrod	Daniel Fuks, Yael Slasky, Yoel Melamed	2015	A4	4	4/04a	37	2015-02-01	Bucket Floated		45	בלתי מזוהה						1	1							אולי אספסת מצויצת, נחכה לעוד כאלה
HLZ-1	Elusa	Bar-Oz, Gini and Weissbrod	Daniel Fuks, Yael Slasky, Yoel Melamed	2015	A4	4	4/04a	37	2015-02-01	Bucket Floated		46	בסיה?						1	1							דומה לבסיה סיכנית, צריך עיון
HLZ-1	Elusa	Bar-Oz, Gini and Weissbrod	Daniel Fuks, Yael Slasky, Yoel Melamed	2015	A4	4	4/04a	37	2015-02-01	Bucket Floated		47	בלתי מזוהה		זרע/פרי				2	2								פתרון למבחנה 30
HLZ-1	Elusa	Bar-Oz, Gini and Weissbrod	Daniel Fuks, Yael Slasky	2015	A4	4	4/04a	37	2015-02-01	Bucket Floated		48	שברק/גרגרנית ערבית	Ononis/Trigonella arabica	זרע	seed	פרפרניים	Fabaceae	1	1			כן	לא הצלחתי לזהות לרמת מין
HLZ-1	Elusa	Bar-Oz, Gini and Weissbrod	Daniel Fuks, Yael Slasky, Yoel Melamed	2015	A4	4	4/04a	37	2015-02-01	Bucket Floated		49	בן-שלח	Reboudia pinnata	זרע בתרמיל	seed in pod	מצליבים	Brassicaceae	8	8				שישה חלקים, חלק קשווה וחלק פרק עליון			יואל אמר או שלח או בן שלח. לדעתי זה שלח, ע"פ צורת ראש פרק עליון ולפי אורך הפרקים	6על בסיס פרק קצה, 2 מצטרפים
HLZ-1	Elusa	Bar-Oz, Gini and Weissbrod	Daniel Fuks, Yael Slasky, Yoel Melamed	2015	A4	4	4/04a	37	2015-02-01	Bucket Floated		50	בלתי מזוהה	?			שושניים	Liliaceae	1	1				לא הצלחתי לזהות לרמת מין			יואל אמר שושניים, או זמזומית, מצילות, כדן...לא נראה לי זמזומית בגלל החלק הפנימי, לא נראה לי מצילות בגלל מרקם הקליפה, ולא יכולתי לומר לגבי כדן כי אין לי כדן שבור
HLZ-1	Elusa	Bar-Oz, Gini and Weissbrod	Daniel Fuks, Yael Slasky	2015	A4	4	4/04a	37	2015-02-01	Bucket Floated		51	בלתי מזוהה						1	1					פרח צעיר של גפן? אכובית?
HLZ-1	Elusa	Bar-Oz, Gini and Weissbrod	Daniel Fuks, Yael Slasky, Yoel Melamed	2015	A4	4	4/04a	37	2015-02-01	Bucket Floated		52	בלתי מזוהה		זרע				1	1					שבר	לחך?
HLZ-1	Elusa	Bar-Oz, Gini and Weissbrod	Daniel Fuks, Yael Slasky, Yoel Melamed	2015	A4	4	4/04a	37	2015-02-01	Bucket Floated		53	בלתי מזוהה						1	1						בלוטיות לאורך, עקמומי, ארוך, עגולי. כמו פרח פריקום אבל לו...למדוד אורך ורוחב...
HLZ-1	Elusa	Bar-Oz, Gini and Weissbrod	Daniel Fuks, Yael Slasky	2015	A4	4	4/04a	37	2015-02-01	Bucket Floated		54	בלתי מזוהה		תפרחות				7	7							מעניין, אי אפשר כרגע לזהות
HLZ-1	Elusa	Bar-Oz, Gini and Weissbrod	Daniel Fuks, Yael Slasky, Yoel Melamed	2015	A4	4	4/04a	37	2015-02-01	Bucket Floated		55	בלתי מזוהה		תפרחות				24	24							דומה למבחנה הקודמת רק גדול יותר
HLZ-1	Elusa	Bar-Oz, Gini and Weissbrod	Daniel Fuks, Yael Slasky, Yoel Melamed	2015	A4	4	4/04a	37	2015-02-01	Bucket Floated		56	בלתי מזוהה		מגוון				0	?					שונות		לא להתעסק
HLZ-1	Elusa	Bar-Oz, Gini and Weissbrod	Daniel Fuks, Yael Slasky	2015	A4	4	4/04a	37	2015-02-01	Bucket Floated		57	בלתי מזוהה						1	1			לא
HLZ-1	Elusa	Bar-Oz, Gini and Weissbrod	Daniel Fuks, Yael Slasky, Yoel Melamed	2015	A4	4	4/04a	37	2015-02-01	Bucket Floated		58	בלתי מזוהה		זרע				4	4
HLZ-1	Elusa	Bar-Oz, Gini and Weissbrod	Daniel Fuks, Yael Slasky, Yoel Melamed	2015	A4	4	4/04a	37	2015-02-01	Bucket Floated		59	בלתי מזוהה		זרע				13	13							לא להתעסק
HLZ-1	Elusa	Bar-Oz, Gini and Weissbrod	Daniel Fuks, Yael Slasky	2015	A4	4	4/04a	37	2015-02-01	Bucket Floated		60	בלתי מזוהה		זרע				1	1			לא				אולי שבר של דמודמית
HLZ-1	Elusa	Bar-Oz, Gini and Weissbrod	Daniel Fuks, Yael Slasky, Yoel Melamed	2015	A4	4	4/04a	37	2015-02-01	Bucket Floated		61	בלתי מזוהה		עלים ותפרחות				83	83			כן				השוו לעיל, 54 55
HLZ-1	Elusa	Bar-Oz, Gini and Weissbrod	Daniel Fuks, Yael Slasky, Yoel Melamed	2015	A4	4	4/04a	37	2015-02-01	Bucket Floated		62	בלתי מזוהה		חלק זרעים				0	הרבה			לרוב				לא להתעסק
HLZ-1	Elusa	Bar-Oz, Gini and Weissbrod	Daniel Fuks, Yael Slasky	2015	A4	4	4/04a	37	2015-02-01	Bucket Floated		63	בלתי מזוהה		זרעים		סוככיים או מורכבים		20	עשרות			לרוב				מעוכלים מדיי
HLZ-1	Elusa	Bar-Oz, Gini and Weissbrod	Daniel Fuks, Yael Slasky, Yoel Melamed	2015	A4	4	4/04a	37	2015-02-01	Bucket Floated		64	חרק		צואה				3	3					צואת פרפרים
HLZ-1	Elusa	Bar-Oz, Gini and Weissbrod	Daniel Fuks, Yael Slasky, Yoel Melamed	2015	A4	4	4/04a	37	2015-02-01	Bucket Floated		65	בלתי מזוהה		זרעים				8	8			לא	כן			לא להתעסק
HLZ-1	Elusa	Bar-Oz, Gini and Weissbrod	Daniel Fuks, Yael Slasky	2015	A4	4	4/04a	37	2015-02-01	Bucket Floated		66	בלתי מזוהה		קליפות				9	9						3 לא מפוחמים	לא להתעסק
HLZ-1	Elusa	Bar-Oz, Gini and Weissbrod	Daniel Fuks, Yael Slasky, Yoel Melamed	2015	A4	4	4/04a	37	2015-02-01	Bucket Floated		67	בלתי מזוהה		זרעים? עגוליים				0	עשרות			כן				לא להתעסק
HLZ-1	Elusa	Bar-Oz, Gini and Weissbrod	Daniel Fuks, Yael Slasky, Yoel Melamed	2015	A4	4	4/04a	37	2015-02-01	Bucket Floated		68	בלתי מזוהה		זרעים" מוארכים				20	עשרות			לא				לא להתעסק
HLZ-1	Elusa	Bar-Oz, Gini and Weissbrod	Daniel Fuks, Yael Slasky	2015	A4	4	4/04a	37	2015-02-01	Bucket Floated		69	בלתי מזוהה		שונות				0	הרבה			לרוב				לא להתעסק
HLZ-1	Elusa	Bar-Oz, Gini and Weissbrod	Daniel Fuks, Yael Slasky, Yoel Melamed	2015	A4	4	4/04a	37	2015-02-01	Bucket Floated		70	חיטה טטרפלוידית	Triticum turgidum s.l.	פרק ציר שיבולת	rachis fragment	דגניים	Gramineae	2	2			כן
HLZ-1	Elusa	Bar-Oz, Gini and Weissbrod	Daniel Fuks, Yael Slasky, Yoel Melamed	2015	A4	4	4/04a	37	2015-02-01	Bucket Floated		71	דגני		פרק ציר שיבולת	rachis fragment	דגניים	Gramineae	4	4			כן							לא ברור איזה
HLZ-1	Elusa	Bar-Oz, Gini and Weissbrod	Daniel Fuks, Yael Slasky	2015	A4	4	4/04a	37	2015-02-01	Bucket Floated		72	שעורה דו-טורית	Hordeum vulgare distichum/spontaneum		rachis			1	1	1mm
HLZ-1	Elusa	Bar-Oz, Gini and Weissbrod	Daniel Fuks, Yael Slasky, Yoel Melamed	2015	A4	4	4/04a	37	2015-02-01	Bucket Floated		73	שעורה דו-טורית	Hordeum vulgare distichum/spontaneum		rachis			1	1	1mm
HLZ-1	Elusa	Bar-Oz, Gini and Weissbrod	Daniel Fuks, Yael Slasky, Yoel Melamed	2015	A4	4	4/04a	37	2015-02-01	Bucket Floated		74	שעורה - ? Cf.			basal rachis fragment			1	1	1mm
HLZ-1	Elusa	Bar-Oz, Gini and Weissbrod	Daniel Fuks, Yael Slasky	2015	A4	4	4/04a	37	2015-02-01	Bucket Floated		75				culm nodes			3	3	1mm
HLZ-1	Elusa	Bar-Oz, Gini and Weissbrod	Daniel Fuks, Yael Slasky, Yoel Melamed	2015	A4	4	4/04a	37	2015-02-01	Bucket Floated		76	חיטה/שעורה			rachis			2	2	1mm
HLZ-1	Elusa	Bar-Oz, Gini and Weissbrod	Daniel Fuks, Yael Slasky, Yoel Melamed	2015	A4	4	4/04a	37	2015-02-01	Bucket Floated		77	חיטה טטרפלוידית	Triticum turgidum s.l.		rachis			1	1	1mm
HLZ-1	Elusa	Bar-Oz, Gini and Weissbrod	Daniel Fuks, Yael Slasky	2015	A4	4	4/04a	37	2015-02-01	Bucket Floated		78	מתנן		עלה	leaf			4	4	1mm
HLZ-1	Elusa	Bar-Oz, Gini and Weissbrod	Daniel Fuks, Yael Slasky, Yoel Melamed	2015	A4	4	4/04a	37	2015-02-01	Bucket Floated		79	ארנבית שרועה						1	1	1mm
HLZ-1	Elusa	Bar-Oz, Gini and Weissbrod	Daniel Fuks, Yael Slasky, Yoel Melamed	2015	A4	4	4/04a	37	2015-02-15	Bucket Floated		80	בלתי						1	1	1mm								תאנה?? Cf.
HLZ-10	Elusa	Bar-Oz, Gini and Weissbrod	Daniel Fuks, Yael Slasky	2015	A1	1	1/09a	58	2015-02-15	Wet Sieve Picking		1	שעורה	Hordeum	גרגיר	grain	דגניים	Gramineae	19	19		כן	כן
HLZ-10	Elusa	Bar-Oz, Gini and Weissbrod	Daniel Fuks, Yael Slasky	2015	A1	1	1/09a	58	2015-02-01	Wet Sieve Picking		2	חיטה/שעורה	Hordeum cf. Triticum	גרגיר	grain	דגניים	Gramineae	4	4			כן
HLZ-10	Elusa	Bar-Oz, Gini and Weissbrod	Daniel Fuks, Yael Slasky	2015	A1	1	1/09a	58	2015-02-01	Wet Sieve Picking		3	גפן	Vitis vinifera	חרצן	pip	גפניים	Vitaceae	4	4		כן	כן
HLZ-10	Elusa	Bar-Oz, Gini and Weissbrod	Daniel Fuks, Yael Slasky	2015	A1	1	1/09a	58	2015-02-01	Wet Sieve Picking		4	עדשה תרבותית	Lens culinaris	זרע	seed	פרפרניים	Fabaceae	2	2			כן		באישור יעל
HLZ-10	Elusa	Bar-Oz, Gini and Weissbrod	Daniel Fuks, Yael Slasky	2015	A1	1	1/09a	58	2015-02-01	Wet Sieve Picking		5	בקיית הכרשינה	Vicia ervilia	זרע	seed	פרפרניים	Fabaceae	1	1			כן		באישור יעל
HLZ-10	Elusa	Bar-Oz, Gini and Weissbrod	Daniel Fuks, Yael Slasky	2015	A1	1	1/09a	58	2015-02-01	Wet Sieve Picking		6	קטנית		זרע	seed	פרפרניים	Fabaceae	1	1	בלתי מעבר לקטנית		כן		כנראה בבקיים, אולי יתחבר בהמשך
HLZ-10	Elusa	Bar-Oz, Gini and Weissbrod	Daniel Fuks, Yael Slasky	2015	A1	1	1/09a	58	2015-02-01	Wet Sieve Picking		7	מתנן שעיר	Thymelaea hirsuta	פרי				1	1			כן		לבדוק שוב באוסף
HLZ-10	Elusa	Bar-Oz, Gini and Weissbrod	Daniel Fuks, Yael Slasky	2015	A1	1	1/09a	58	2015-02-01	Wet Sieve Picking		8	דבקה	Galium	פרודה		פואתיים	Rubiaceae	1	1			כן		לזהות באוסף
HLZ-10	Elusa	Bar-Oz, Gini and Weissbrod	Daniel Fuks, Yael Slasky	2015	A1	1	1/09a	59	2015-02-01	Wet Sieve Picking		9	זון	Lolium	גרגיר	grain	דגניים		1	1			כן		להראות ליואל
HLZ-10	Elusa	Bar-Oz, Gini and Weissbrod	Daniel Fuks, Yael Slasky	2015	A1	1	1/09a	60	2015-02-01	Wet Sieve Picking		10	דגני		שברים				4	4			כן
HLZ-11	Elusa	Bar-Oz, Gini and Weissbrod	Daniel Fuks, Yael Slasky	2015	A4	4	4/01a	8	2015-02-01	Bucket Floated	8	1	מתנן שעיר	Thymelaea hirsuta	אגוזית			מתנניים	1	1		כן	כן
HLZ-11	Elusa	Bar-Oz, Gini and Weissbrod	Daniel Fuks, Yael Slasky	2015	A4	4	4/01a	8	2015-02-15	Bucket Floated		2	מתנן שעיר	Thymelaea hirsuta	עלה			מתנניים	2	2		כן	כן
HLZ-11	Elusa	Bar-Oz, Gini and Weissbrod	Daniel Fuks, Yael Slasky	2015	A4	4	4/01a	8	2015-02-15	Bucket Floated		3	דגני		מלען- שברים			דגניים	8	8			כן		לזהות בהמשך אם אפשר
HLZ-11	Elusa	Bar-Oz, Gini and Weissbrod	Daniel Fuks, Yael Slasky	2015	A4	4	4/01a	8	2015-02-01	Bucket Floated		4	דגני		פרק ציר שיבולת	rachis fragment	דגניים	Gramineae	6	6			כן							השתמרות ברועה. אולי שעורה
HLZ-11	Elusa	Bar-Oz, Gini and Weissbrod	Daniel Fuks, Yael Slasky	2015	A4	4	4/01a	8	2015-02-01	Bucket Floated		5	דגני		גרגיר-שברים			דגניים	14	14			כן		שברים
HLZ-11	Elusa	Bar-Oz, Gini and Weissbrod	Daniel Fuks, Yael Slasky	2015	A4	4	4/01a	8	2015-02-01	Bucket Floated		6	אהל מצוי	Emex spinosa	פירות	fruit		חיעדיים	69	69		כן	לא	כן	ועוד עשרות שברים ואחד הלקט?
HLZ-11	Elusa	Bar-Oz, Gini and Weissbrod	Daniel Fuks, Yael Slasky	2015	A4	4	4/01a	8	2015-02-01	Bucket Floated		7	אשל הפרקים	Tamarix aphylla	פרקים				3	3			אחד לא		אשל? סלקיים?
HLZ-11	Elusa	Bar-Oz, Gini and Weissbrod	Daniel Fuks, Yael Slasky	2015	A4	4	4/01a	8	2015-02-01	Bucket Floated		8	מתנן שעיר	Thymelaea hirsuta	ניצן				1	1			כן		לזהה לפריטים ב-HLZ-9	לבדוק שוב
HLZ-11	Elusa	Bar-Oz, Gini and Weissbrod	Daniel Fuks, Yael Slasky	2015	A4	4	4/01a	8	2015-02-01	Bucket Floated		9	בלתי מזוהה		ניצן?				3	3			כן		לזהה לפריטים ב-HLZ-9
HLZ-11	Elusa	Bar-Oz, Gini and Weissbrod	Daniel Fuks, Yael Slasky	2015	A4	4	4/01a	8	2015-02-01	Bucket Floated		10	בלתי מזוהה		מלען של מקור חסידה? מלעניאל?				1	1
HLZ-11	Elusa	Bar-Oz, Gini and Weissbrod	Daniel Fuks, Yael Slasky	2015	A4	4	4/01a	8	2015-02-01	Bucket Floated		11	בלתי מזוהה		עלים				2	2			כן		2 מינים שונים
HLZ-11	Elusa	Bar-Oz, Gini and Weissbrod	Daniel Fuks, Yael Slasky	2015	A4	4	4/01a	8	2015-02-01	Bucket Floated		12	מררית	Picris	זרעון		מורכבים	Asteraceae	1	1			לא	כן	אפשר להגדיר
HLZ-11	Elusa	Bar-Oz, Gini and Weissbrod	Daniel Fuks, Yael Slasky	2015	A4	4	4/01a	8	2015-02-01	Bucket Floated		13	לחך סגלגל?						2	2			לא	כן	אפשר להגדיר
HLZ-11	Elusa	Bar-Oz, Gini and Weissbrod	Daniel Fuks, Yael Slasky	2015	A4	4	4/01a	8	2015-02-01	Bucket Floated		14	פיקוס התאנה	Ficus carica	אגוזית	nutlet	תותיים	Moraceae	7	7			כן		7 שלמים, MNI 9		תאנה
HLZ-11	Elusa	Bar-Oz, Gini and Weissbrod	Daniel Fuks, Yael Slasky	2015	A4	4	4/01a	8	2015-02-01	Bucket Floated		15	חיעד ספרדי						2	2			אחד לא
HLZ-11	Elusa	Bar-Oz, Gini and Weissbrod	Daniel Fuks, Yael Slasky	2015	A4	4	4/01a	8	2015-02-01	Bucket Floated		16	אהל מצוי	Mesembryanthemum nodiflorum					2	2		לא	כן		שני המפוחמים היו מחוברים
HLZ-11	Elusa	Bar-Oz, Gini and Weissbrod	Daniel Fuks, Yael Slasky	2015	A4	4	4/01a	8	2015-02-01	Bucket Floated		17	בלתי מזוהה						0	עשרות			לא	כן	לא להתעסק
HLZ-11	Elusa	Bar-Oz, Gini and Weissbrod	Daniel Fuks, Yael Slasky	2015	A4	4	4/01a	8	2015-02-01	Bucket Floated		18	חרק		ראש				1	1			כנראה
HLZ-12	Elusa	Bar-Oz, Gini and Weissbrod	Daniel Fuks, Yael Slasky	2015	A4	4	4/01a	8	2015-02-15	Wet Sieve Picking	56	1	שעורה	Hordeum	גרגיר	grain	דגניים	Gramineae	4	4		כן	כן
HLZ-12	Elusa	Bar-Oz, Gini and Weissbrod	Daniel Fuks, Yael Slasky	2015	A4	4	4/01a	8	2015-02-15	Wet Sieve Picking		2	זית	Olea europaea	גלעין	pit	זיתיים	Oleaceae	1	1		כן	כן		שני חצאים
HLZ-12	Elusa	Bar-Oz, Gini and Weissbrod	Daniel Fuks, Yael Slasky	2015	A4	4	4/01a	8	2015-02-01	Wet Sieve Picking		3	בקיים	Vicieae	זרע	seed	פרפרניים	Fabaceae	1	1	למעשה חצי זרע		כן		חצי. להגדיר
HLZ-13	Elusa	Bar-Oz, Gini and Weissbrod	Daniel Fuks, Yael Slasky	2015	A4	4	4/02a	16	2015-02-01	Bucket Floated		1	גפן	Vitis vinifera	חרצן	pip	גפניים	Vitaceae	2	2		כן	כן
HLZ-13	Elusa	Bar-Oz, Gini and Weissbrod	Daniel Fuks, Yael Slasky	2015	A4	4	4/02a	16	2015-02-01	Bucket Floated		2			קליפה				6	6		לא	כן		6 חתיכות. MNI =1
HLZ-13	Elusa	Bar-Oz, Gini and Weissbrod	Daniel Fuks, Yael Slasky	2015	A4	4	4/02a	16	2015-02-01	Bucket Floated		3	גפן	Vitis vinifera	עוקצים	pedicel			13	13		לא	כן		לטפל בעוקצים בהמשך
HLZ-13	Elusa	Bar-Oz, Gini and Weissbrod	Daniel Fuks, Yael Slasky	2015	A4	4	4/02a	16	2015-02-01	Bucket Floated		4	שעורה	Hordeum	גרגיר	grain	דגניים	Gramineae	12	12		כן	כן		יעל ראתה
HLZ-13	Elusa	Bar-Oz, Gini and Weissbrod	Daniel Fuks, Yael Slasky	2015	A4	4	4/02a	16	2015-02-01	Bucket Floated		5	חיטה	Triticum	גרגיר ועובר	gain + embryo	דגניים	Gramineae	1	1		כן	כן		יעל ראתה
HLZ-13	Elusa	Bar-Oz, Gini and Weissbrod	Daniel Fuks, Yael Slasky	2015	A4	4	4/02a	16	2015-02-01	Bucket Floated		6	דגני		שברי גרגיר				20	עשרות			כן		כולל כמה שגדולים מ-50% אך לא מזוהים
HLZ-13	Elusa	Bar-Oz, Gini and Weissbrod	Daniel Fuks, Yael Slasky	2015	A4	4	4/02a	16	2015-02-01	Bucket Floated		7	דגן		פרק ציר שיבולת	rachis fragment	דגניים	Gramineae	43	43			כן							שעורה 6-טורית, דו-טורית וחיטה טטרפלוידית
HLZ-13	Elusa	Bar-Oz, Gini and Weissbrod	Daniel Fuks, Yael Slasky	2015	A4	4	4/02a	16	2015-02-01	Bucket Floated		8	דגני		פרקים				8	8			כן
HLZ-13	Elusa	Bar-Oz, Gini and Weissbrod	Daniel Fuks, Yael Slasky	2015	A4	4	4/02a	16	2015-02-01	Bucket Floated		9	דגני		שברי מלען				26	26			כן		כולל את החלק התחתון
HLZ-13	Elusa	Bar-Oz, Gini and Weissbrod	Daniel Fuks, Yael Slasky	2015	A4	4	4/02a	16	2015-02-01	Bucket Floated		10	מתנן שעיר	Thymelaea hirsuta	אגוזית				2	2			כן
HLZ-13	Elusa	Bar-Oz, Gini and Weissbrod	Daniel Fuks, Yael Slasky	2015	A4	4	4/02a	16	2015-02-01	Bucket Floated		11	מתנן שעיר	Thymelaea hirsuta	עלים				36	36			כן		36 עלים ו9 שברים
HLZ-13	Elusa	Bar-Oz, Gini and Weissbrod	Daniel Fuks, Yael Slasky	2015	A4	4	4/02a	16	2015-02-01	Bucket Floated		12	מתנן שעיר	Thymelaea hirsuta	ניצנים				2	2			כן
HLZ-13	Elusa	Bar-Oz, Gini and Weissbrod	Daniel Fuks, Yael Slasky	2015	A4	4	4/02a	16	2015-02-01	Bucket Floated		13	עוקץ-עקרב						1	1			כן		להגדיר
HLZ-13	Elusa	Bar-Oz, Gini and Weissbrod	Daniel Fuks, Yael Slasky	2015	A4	4	4/02a	16	2015-02-01	Bucket Floated		14	חומעה						1	1			לא	כן
HLZ-13	Elusa	Bar-Oz, Gini and Weissbrod	Daniel Fuks, Yael Slasky	2015	A4	4	4/02a	16	2015-02-01	Bucket Floated		15	בן-שלח	Reboudia pinnata	זרע בתרמיל	seed in pod	מצליבים	Brassicaceae	2	2
HLZ-13	Elusa	Bar-Oz, Gini and Weissbrod	Daniel Fuks, Yael Slasky	2015	A4	4	4/02a	16	2015-02-01	Bucket Floated		16	צנון?	Raphanus raphanistrum?			מצליבים	Brassicaceae	2	2					האם שני החלקים שייכים לשלח/צנון?
HLZ-13	Elusa	Bar-Oz, Gini and Weissbrod	Daniel Fuks, Yael Slasky	2015	A4	4	4/02a	16	2015-02-01	Bucket Floated		17	עכנאי שרוע	Echium angustifolium					1	1					לוודא
HLZ-13	Elusa	Bar-Oz, Gini and Weissbrod	Daniel Fuks, Yael Slasky	2015	A4	4	4/02a	16	2015-02-01	Bucket Floated		18	חיעד ספרדי	Aizoon hispanicum					2	2			כן
HLZ-13	Elusa	Bar-Oz, Gini and Weissbrod	Daniel Fuks, Yael Slasky	2015	A4	4	4/02a	16	2015-02-01	Bucket Floated		19	אהל מצוי	Mesembryanthemum nodiflorum	פרי				6	6			לא	כן	אחד מזכיר אהל קנרי
HLZ-13	Elusa	Bar-Oz, Gini and Weissbrod	Daniel Fuks, Yael Slasky	2015	A4	4	4/02a	16	2015-02-01	Bucket Floated		20	בלתי מזוהה		עלה?				2	2			אחד	אחד כן
HLZ-13	Elusa	Bar-Oz, Gini and Weissbrod	Daniel Fuks, Yael Slasky	2015	A4	4	4/02a	16	2015-02-01	Bucket Floated		21	פיקוס התאנה	Ficus carica	אגוזית וציפה	nutlet	תותיים	Moraceae	21	21					חתיכת ציפה עם אגוזיות נספרת כאחת. 5 לא מפוחמים. אפשר לבדוק שוב
HLZ-13	Elusa	Bar-Oz, Gini and Weissbrod	Daniel Fuks, Yael Slasky	2015	A4	4	4/02a	16	2015-02-01	Bucket Floated		22	אשל הפרקים	Tamarix aphylla	פרק				2	2			כן
HLZ-13	Elusa	Bar-Oz, Gini and Weissbrod	Daniel Fuks, Yael Slasky	2015	A4	4	4/02a	16	2015-02-01	Bucket Floated		23	דגני		גרגיר				1	1			כן
HLZ-13	Elusa	Bar-Oz, Gini and Weissbrod	Daniel Fuks, Yael Slasky	2015	A4	4	4/02a	16	2015-02-01	Bucket Floated		24	בלתי מזוהה		קוצי עלים				30	30			כן		ניתנים להגדרה
HLZ-13	Elusa	Bar-Oz, Gini and Weissbrod	Daniel Fuks, Yael Slasky	2015	A4	4	4/02a	16	2015-02-01	Bucket Floated		25	בלתי מזוהה		פרח מתנן?				1	1			כן		לחבר בהמשך
HLZ-13	Elusa	Bar-Oz, Gini and Weissbrod	Daniel Fuks, Yael Slasky	2015	A4	4	4/02a	16	2015-02-01	Bucket Floated		26	בלתי מזוהה		פרק/ניצן				1	1			כן		לחבר בהמשך
HLZ-13	Elusa	Bar-Oz, Gini and Weissbrod	Daniel Fuks, Yael Slasky	2015	A4	4	4/02a	16	2015-02-01	Bucket Floated		27	בלתי מזוהה		ניצנים				20	עשרות			כן
HLZ-13	Elusa	Bar-Oz, Gini and Weissbrod	Daniel Fuks, Yael Slasky	2015	A4	4	4/02a	16	2015-02-01	Bucket Floated		28	בלתי מזוהה		שונות				20	עשרות			כן		ניתנים לזיהוי כולל אולי תאנה
HLZ-13	Elusa	Bar-Oz, Gini and Weissbrod	Daniel Fuks, Yael Slasky	2015	A4	4	4/02a	16	2015-02-01	Bucket Floated		29	בלתי מזוהה										כן
HLZ-13	Elusa	Bar-Oz, Gini and Weissbrod	Daniel Fuks, Yael Slasky	2015	A4	4	4/02a	16	2015-02-01	Bucket Floated		30	חרק		ראש				1	1			נראה
HLZ-13	Elusa	Bar-Oz, Gini and Weissbrod	Daniel Fuks, Yael Slasky	2015	A4	4	4/02a	16	2015-02-01	Bucket Floated		31	בלתי מזוהה		ענפים				3	3			כן		אולי 4
HLZ-13	Elusa	Bar-Oz, Gini and Weissbrod	Daniel Fuks, Yael Slasky	2015	A4	4	4/02a	16	2015-02-01	Bucket Floated		32	בלתי
HLZ-13	Elusa	Bar-Oz, Gini and Weissbrod	Daniel Fuks, Yael Slasky	2015	A4	4	4/02a	16	2015-02-01	Bucket Floated		33				culm nodes			1	1	1mm,2mm
HLZ-14	Elusa	Bar-Oz, Gini and Weissbrod	Daniel Fuks, Yael Slasky	2015	A4	4	4/02a	16	2015-02-01	Wet Sieve Picking		1	שעורה	Hordeum	גרגיר	grain	דגניים	Gramineae	21	21			כן		אפשר לוודא לגבי 2
HLZ-14	Elusa	Bar-Oz, Gini and Weissbrod	Daniel Fuks, Yael Slasky	2015	A4	4	4/02a	16	2015-02-01	Wet Sieve Picking		2	חיטה	Triticum	גרגיר	grain	דגניים	Gramineae	2	2			כן
HLZ-15	Elusa	Bar-Oz, Gini and Weissbrod	Daniel Fuks, Yael Slasky	2015	A4	4	4/02a	25	2015-02-01	Bucket Floated		1	גפן	Vitis vinifera	חרצן	pip	גפניים	Vitaceae	1	1			כן		אמנם פחות מאחד שלם אך יש עוקץ חרצן ויש MNI=1
HLZ-15	Elusa	Bar-Oz, Gini and Weissbrod	Daniel Fuks, Yael Slasky	2015	A4	4	4/02a	25	2015-02-15	Bucket Floated		2	שעורה	Hordeum	גרגיר	grain	דגניים	Gramineae	46	46			כן		אחד עטוי יפה
HLZ-15	Elusa	Bar-Oz, Gini and Weissbrod	Daniel Fuks, Yael Slasky	2015	A4	4	4/02a	25	2015-02-15	Bucket Floated		3	חיטה/שעורה	Hordeum cf. Triticum	גרגיר	grain	דגניים	Gramineae	8	8			כן
HLZ-15	Elusa	Bar-Oz, Gini and Weissbrod	Daniel Fuks, Yael Slasky	2015	A4	4	4/02a	25	2015-02-01	Bucket Floated		4	דגני		גרגיר				8	8			כן		להגדרה
HLZ-15	Elusa	Bar-Oz, Gini and Weissbrod	Daniel Fuks, Yael Slasky	2015	A4	4	4/02a	25	2015-02-01	Bucket Floated		5	דגני		שברי גרגיר								כן
HLZ-15	Elusa	Bar-Oz, Gini and Weissbrod	Daniel Fuks, Yael Slasky	2015	A4	4	4/02a	25	2015-02-01	Bucket Floated		6	תמר	Phoenix dactylifera	שבר גלעין	seed	דקליים	Palmae	1	1			כן		במבחנה
HLZ-15	Elusa	Bar-Oz, Gini and Weissbrod	Daniel Fuks, Yael Slasky	2015	A4	4	4/02a	25	2015-02-01	Bucket Floated		7	פיקוס התאנה	Ficus carica	אגוזית	nutlet	תותיים	Moraceae	37	37			כן		צירפתי 2, אחד שבור ולא ברור ולא נספר
HLZ-15	Elusa	Bar-Oz, Gini and Weissbrod	Daniel Fuks, Yael Slasky	2015	A4	4	4/02a	25	2015-02-01	Bucket Floated		8	בלתי מזוהה		זרע				10	10			כן				לא להתעסק בינתיים
HLZ-15	Elusa	Bar-Oz, Gini and Weissbrod	Daniel Fuks, Yael Slasky	2015	A4	4	4/02a	25	2015-02-01	Bucket Floated		9	דגני		מלען שברים				32	32			כן
HLZ-15	Elusa	Bar-Oz, Gini and Weissbrod	Daniel Fuks, Yael Slasky	2015	A4	4	4/02a	25	2015-02-01	Bucket Floated		10	גפן	Vitis vinifera	עוקץ				3	3			כן
HLZ-15	Elusa	Bar-Oz, Gini and Weissbrod	Daniel Fuks, Yael Slasky	2015	A4	4	4/02a	25	2015-02-01	Bucket Floated		11	חיעד ספרדי						2	2			כן		אחד לא בטוח
HLZ-15	Elusa	Bar-Oz, Gini and Weissbrod	Daniel Fuks, Yael Slasky	2015	A4	4	4/02a	25	2015-02-01	Bucket Floated		12	מתנן שעיר	Thymelaea hirsuta	אגוזית				4	4			כן		אחד שבור לא נספר
HLZ-15	Elusa	Bar-Oz, Gini and Weissbrod	Daniel Fuks, Yael Slasky	2015	A4	4	4/02a	25	2015-02-01	Bucket Floated		13	מתנן שעיר	Thymelaea hirsuta	עלים				28	28			כן		כולל18 שלמים מתוכם 5לא מפוחמים ועוד 9עם עוקץ מתוכם 3לא מפוחמים ועוד8 שברים מתוכם 2לאמפוחמים
HLZ-15	Elusa	Bar-Oz, Gini and Weissbrod	Daniel Fuks, Yael Slasky	2015	A4	4	4/02a	25	2015-02-15	Bucket Floated		14	אהל מצוי		פרי				7	7			לא	כן
HLZ-15	Elusa	Bar-Oz, Gini and Weissbrod	Daniel Fuks, Yael Slasky	2015	A4	4	4/02a	25	2015-02-15	Bucket Floated		15	אשל הפרקים	Tamarix aphylla	פרקים				1	1			לא	לא	מצופה בהרבה חול. 2פרקים מחוברים
HLZ-15	Elusa	Bar-Oz, Gini and Weissbrod	Daniel Fuks, Yael Slasky	2015	A4	4	4/02a	25	2015-02-01	Bucket Floated		16	ארנבית שרועה	Arnebia decumbens	זרע/פרודה				1	1			לא		בדוק-עמ' 59 במחברת	עוד זיפני אחר, דומה יותר לגלעינית זעירת פרחים נפלה ולהלכה לאיבוד
HLZ-15	Elusa	Bar-Oz, Gini and Weissbrod	Daniel Fuks, Yael Slasky	2015	A4	4	4/02a	25	2015-02-01	Bucket Floated		17	בסיה?	Bassia?					1	1			לא	כן	להגדיר בהמשך
HLZ-15	Elusa	Bar-Oz, Gini and Weissbrod	Daniel Fuks, Yael Slasky	2015	A4	4	4/02a	25	2015-02-01	Bucket Floated		18	בן-שלח	Reboudia pinnata	זרע בתרמיל	seed in pod	מצליבים	Brassicaceae	1	1			כן
HLZ-15	Elusa	Bar-Oz, Gini and Weissbrod	Daniel Fuks, Yael Slasky	2015	A4	4	4/02a	25	2015-02-01	Bucket Floated		19	דגן		פרק ציר שיבולת	rachis fragment	דגניים	Gramineae	38	38			כן		לא הכל ניתן להגדיר					שעורה 6-טורית, דו-טורית וחיטה טטרפלוידית
HLZ-15	Elusa	Bar-Oz, Gini and Weissbrod	Daniel Fuks, Yael Slasky	2015	A4	4	4/02a	25	2015-02-01	Bucket Floated		20	דגני		פרקים				12	12			כן
HLZ-15	Elusa	Bar-Oz, Gini and Weissbrod	Daniel Fuks, Yael Slasky	2015	A4	4	4/02a	25	2015-02-01	Bucket Floated		21	בלתי מזוהה		ענפים				7	7			כן		אולי ניתן להגדיר
HLZ-15	Elusa	Bar-Oz, Gini and Weissbrod	Daniel Fuks, Yael Slasky	2015	A4	4	4/02a	25	2015-02-01	Bucket Floated		22	בלתי מזוהה		עלים				6	6			כן
HLZ-15	Elusa	Bar-Oz, Gini and Weissbrod	Daniel Fuks, Yael Slasky	2015	A4	4	4/02a	25	2015-02-01	Bucket Floated		23	בלתי מזוהה		עלים				31	31			כן
HLZ-15	Elusa	Bar-Oz, Gini and Weissbrod	Daniel Fuks, Yael Slasky	2015	A4	4	4/02a	25	2015-02-01	Bucket Floated		24	בלתי מזוהה		עלים				4	4			2		לחזור לזה
HLZ-15	Elusa	Bar-Oz, Gini and Weissbrod	Daniel Fuks, Yael Slasky	2015	A4	4	4/02a	25	2015-02-01	Bucket Floated		25	מתנן שעיר	Thymelaea hirsuta	ניצן				1	1			כן		כולל כמה עלים
HLZ-15	Elusa	Bar-Oz, Gini and Weissbrod	Daniel Fuks, Yael Slasky	2015	A4	4	4/02a	25	2015-02-01	Bucket Floated		26	בלתי מזוהה		ניצנים				5	5			כן
HLZ-15	Elusa	Bar-Oz, Gini and Weissbrod	Daniel Fuks, Yael Slasky	2015	A4	4	4/02a	25	2015-02-01	Bucket Floated		27	בלתי מזוהה						0	עשרות			כן
HLZ-15	Elusa	Bar-Oz, Gini and Weissbrod	Daniel Fuks, Yael Slasky	2015	A4	4	4/02a	25	2015-02-01	Bucket Floated		28	בלתי מזוהה		זרעים				13	13	אשל הפרקים, אולי פגוניה, תלתן גדול		כן		ליואל
HLZ-15	Elusa	Bar-Oz, Gini and Weissbrod	Daniel Fuks, Yael Slasky	2015	A4	4	4/02a	25	2015-02-01	Bucket Floated		29	בלתי מזוהה		זרעים				1	1			כן		ליואל
HLZ-15	Elusa	Bar-Oz, Gini and Weissbrod	Daniel Fuks, Yael Slasky	2015	A4	4	4/02a	25	2015-02-01	Bucket Floated		30	בלתי מזוהה		זרעים				3	3			כן				ברי זיהוי בהמשך
HLZ-15	Elusa	Bar-Oz, Gini and Weissbrod	Daniel Fuks, Yael Slasky	2015	A4	4	4/02a	25	2015-02-15	Bucket Floated		31				culm node			1	1
HLZ-15	Elusa	Bar-Oz, Gini and Weissbrod	Daniel Fuks, Yael Slasky	2015	A4	4	4/02a	25	2015-02-15	Bucket Floated		32	בלתי
HLZ-15	Elusa	Bar-Oz, Gini and Weissbrod	Daniel Fuks, Yael Slasky	2015	A4	4	4/02a	25	2015-02-01	Bucket Floated		33	שעורה דו-טורית	Hordeum vulgare distichum/spontaneum		rachis			1	1	1mm
HLZ-16	Elusa	Bar-Oz, Gini and Weissbrod	Daniel Fuks, Yael Slasky	2015	A4	4	4/05a	45	2015-02-01	Wet Sieve Picking		1	גפן	Vitis vinifera	חרצן	pip	גפניים	Vitaceae	91	91			כן		10אצל גיא, 81אצלי פלוס חתיכת אנדוספרם		נמצא בקופסית
HLZ-16	Elusa	Bar-Oz, Gini and Weissbrod	Daniel Fuks, Yael Slasky	2015	A4	4	4/05a	45	2015-02-01	Wet Sieve Picking		2	שעורה	Hordeum	גרגיר	grain	דגניים	Gramineae	307	307			כן		לתקן את התוצאות הפרלימינריות		נמצא בקופסית
HLZ-16	Elusa	Bar-Oz, Gini and Weissbrod	Daniel Fuks, Yael Slasky	2015	A4	4	4/05a	45	2015-02-01	Wet Sieve Picking		3	תמר	Phoenix dactylifera	גלעין	seed	דקליים	Palmae	10	10			כן		הופרד למסירה לגיל זאבי	כוללת 6 שלמים ו8 חצאים	נמצא בקופסית
HLZ-16	Elusa	Bar-Oz, Gini and Weissbrod	Daniel Fuks, Yael Slasky	2015	A4	4	4/05a	45	2015-02-01	Wet Sieve Picking		4	זית	Olea europaea	גלעין	pit	זיתיים	Oleaceae	5	5			כן		בקופסית
HLZ-16	Elusa	Bar-Oz, Gini and Weissbrod	Daniel Fuks, Yael Slasky	2015	A4	4	4/05a	45	2015-02-01	Wet Sieve Picking		5	חיטה	Triticum	גרגיר	grain	דגניים	Gramineae	21	21			כן
HLZ-16	Elusa	Bar-Oz, Gini and Weissbrod	Daniel Fuks, Yael Slasky	2015	A4	4	4/05a	45	2015-02-01	Wet Sieve Picking		6	חיטה/שעורה	Triticum/Hordeum	גרגיר	grain	דגניים	Gramineae	31	31			כן
HLZ-16	Elusa	Bar-Oz, Gini and Weissbrod	Daniel Fuks, Yael Slasky	2015	A4	4	4/05a	45	2015-02-01	Wet Sieve Picking		7	דגני		שברי דגן	grain fragments	דגניים	Gramineae					כן
HLZ-16	Elusa	Bar-Oz, Gini and Weissbrod	Daniel Fuks, Yael Slasky	2015	A4	4	4/05a	45	2015-02-01	Wet Sieve Picking		8	שעורה שש-טורית	Hordeum vulgare subsp. hexastichum	פרק ציר שיבולת	rachis fragment	דגניים	Gramineae	1	1			כן		2 פרקים
HLZ-16	Elusa	Bar-Oz, Gini and Weissbrod	Daniel Fuks, Yael Slasky	2015	A4	4	4/05a	45	2015-02-01	Wet Sieve Picking		9	דגני		פרקים	culm nodes	דגניים	Gramineae	8	8			כן
HLZ-16	Elusa	Bar-Oz, Gini and Weissbrod	Daniel Fuks, Yael Slasky	2015	A4	4	4/05a	45	2015-02-01	Wet Sieve Picking		10	חידקונית		ראש				1	1			כן		מעניין
HLZ-16	Elusa	Bar-Oz, Gini and Weissbrod	Daniel Fuks, Yael Slasky	2015	A4	4	4/05a	45	2015-02-01	Wet Sieve Picking		11	אמיך קוצני	Emex spinosa	פרי				1	1			כן
HLZ-16	Elusa	Bar-Oz, Gini and Weissbrod	Daniel Fuks, Yael Slasky	2015	A4	4	4/05a	45	2015-02-01	Wet Sieve Picking		12	גפן	Vitis vinifera	חרצן	pip	גפניים	Vitaceae	1	1			כן		שבור
HLZ-16	Elusa	Bar-Oz, Gini and Weissbrod	Daniel Fuks, Yael Slasky	2015	A4	4	4/05a	45	2015-02-01	Wet Sieve Picking		13	גפן??		עוקצים				4	4			כן		להתעסק בהמשך
HLZ-16	Elusa	Bar-Oz, Gini and Weissbrod	Daniel Fuks, Yael Slasky	2015	A4	4	4/05a	45	2015-02-01	Wet Sieve Picking		14	בלתי מזוהה		שונות				0	עשרות			לרוב		לא להתעסק
HLZ-16	Elusa	Bar-Oz, Gini and Weissbrod	Daniel Fuks, Yael Slasky	2015	A4	4	4/05a	45	2015-02-01	Wet Sieve Picking		15	חרוב מצוי	Ceratonia siliqua	זרע	seed	כליליים	Caesalpiniaceae	1	1			כן		מנופח
HLZ-16	Elusa	Bar-Oz, Gini and Weissbrod	Daniel Fuks, Yael Slasky	2015	A4	4	4/05a	45	2015-02-01	Wet Sieve Picking		16	גלל		גלל				2	2			כן
HLZ-16	Elusa	Bar-Oz, Gini and Weissbrod	Daniel Fuks, Yael Slasky	2015	A4	4	4/05a	45	2015-02-01	Wet Sieve Picking		17	מתנן שעיר	Thymelaea hirsuta	אגוזית				3	3			כנראה		חתיכה רביעית לא נספרת
HLZ-16	Elusa	Bar-Oz, Gini and Weissbrod	Daniel Fuks, Yael Slasky	2015	A4	4	4/05a	45	2015-02-01	Wet Sieve Picking		18	פיקוס התאנה	Ficus carica	אגוזית וציפה				2	2			כן		אחד בתוך ציפה
HLZ-16	Elusa	Bar-Oz, Gini and Weissbrod	Daniel Fuks, Yael Slasky	2015	A4	4	4/05a	45	2015-02-01	Wet Sieve Picking		19	עדשה תרבותית	Lens culinaris	זרע	seed	פרפרניים	Fabaceae	25	25			כן		באישור יעל
HLZ-16	Elusa	Bar-Oz, Gini and Weissbrod	Daniel Fuks, Yael Slasky	2015	A4	4	4/05a	45	2015-02-01	Wet Sieve Picking		20	בקיה שעירה/דקת-עלים	Vicia villosa/tenuifolia	זרע	seed	פרפרניים	Fabaceae	1	1			כן		בהדרכת יואל
HLZ-16	Elusa	Bar-Oz, Gini and Weissbrod	Daniel Fuks, Yael Slasky	2015	A4	4	4/05a	45	2015-02-01	Wet Sieve Picking		21	בקיה צרפתית cf. טופח נאה	Lathyrus marmoratus cf. Vicia narbonensis	זרע	seed	פרפרניים	Fabaceae	1	1			כן		בהדרכת יואל
HLZ-16	Elusa	Bar-Oz, Gini and Weissbrod	Daniel Fuks, Yael Slasky	2015	A4	4	4/05a	45	2015-02-01	Wet Sieve Picking		22	בקיית הכרשינה	Vicia ervilia	זרע	seed	פרפרניים	Fabaceae	3	3			כן				למדוד אורך טבורית בכל שאר הכרשינה שלי ולהסביר. אם יש בעיה ללכת לטופחים
HLZ-16	Elusa	Bar-Oz, Gini and Weissbrod	Daniel Fuks, Yael Slasky	2015	A4	4	4/05a	45	2015-02-01	Wet Sieve Picking		23	קטנית		זרע	seed	פרפרניים	Fabaceae	2	2			כן		שבורים וחצאים	יעל: רק אם מצטרף למשהו
HLZ-16	Elusa	Bar-Oz, Gini and Weissbrod	Daniel Fuks, Yael Slasky	2015	A4	4	4/05a	45	2015-02-01	Wet Sieve Picking		24	בלתי		אנדוספרם	endosperm			1	1	של שיטה? שיזף?		כן				פחות או יותר פסלנו שיזף, חשבנו על חרוב ושיטה. שיטה סבירה יותר
HLZ-16	Elusa	Bar-Oz, Gini and Weissbrod	Daniel Fuks, Yael Slasky	2015	A4	4	4/05a	45	2015-02-01	Wet Sieve Picking		25	בלתי מזוהה		זרע				2	2	להגדיר בהמשך		כן			בדקתי כמון, כמנון וסוככיים אחרים ולא הצלחתי
HLZ-16	Elusa	Bar-Oz, Gini and Weissbrod	Daniel Fuks, Yael Slasky	2015	A4	4	4/05a	45	2015-02-01	Wet Sieve Picking		26	מתנן שעיר?	Thymelaea hirsuta?	אגוזית				1	1			כן		לבדוק בהמשך	מתנן משונה
HLZ-16	Elusa	Bar-Oz, Gini and Weissbrod	Daniel Fuks, Yael Slasky	2015	A4	4	4/05a	45	2015-02-01	Wet Sieve Picking		27	זון?		גרגיר	grain	דגניים	Gramineae	1	1			כן		לבדוק בהמשך
HLZ-16	Elusa	Bar-Oz, Gini and Weissbrod	Daniel Fuks, Yael Slasky	2015	A4	4	4/05a	45	2015-02-01	Wet Sieve Picking		28	בקיים	Vicieae	זרע	seed	פרפרניים	Fabaceae	1	1			כן				אולי אפון
HLZ-16	Elusa	Bar-Oz, Gini and Weissbrod	Daniel Fuks, Yael Slasky	2015	A4	4	4/05a	45	2015-02-01	Wet Sieve Picking		29	בקיה	Vicia sp.	זרע	seed	פרפרניים	Fabaceae	1	1			כן		אני חשבתי בקיה תרבותית אך מסתבר שאי אפשר להגדיר בזה מין כרגע		שדוף, ניתן לומר רק שזה בקיה
HLZ-16	Elusa	Bar-Oz, Gini and Weissbrod	Daniel Fuks, Yael Slasky	2015	A4	4	4/05a	45	2015-02-01	Wet Sieve Picking		30	בקיה	Vicia sp.	זרע	seed	פרפרניים	Fabaceae	3	3			כן				לא בר הגדרה בשלב זה
HLZ-16	Elusa	Bar-Oz, Gini and Weissbrod	Daniel Fuks, Yael Slasky	2015	A4	4	4/05a	45	2015-02-01	Wet Sieve Picking		31	בקיים	Vicieae	זרע	seed	פרפרניים	Fabaceae	1	1			כן		דומה לפול, יעל ויואל ראו
HLZ-16	Elusa	Bar-Oz, Gini and Weissbrod	Daniel Fuks, Yael Slasky	2015	A4	4	4/05a	45	2015-02-01	Wet Sieve Picking		32	קטנית קטנה ועגולה		זרע	seed	פרפרניים	Fabaceae	1	1			כן		יעל ויואל ראו
HLZ-16	Elusa	Bar-Oz, Gini and Weissbrod	Daniel Fuks, Yael Slasky	2015	A4	4	4/05a	45	2015-02-01	Wet Sieve Picking		33	חיטה cf.	Triticum cf.	גרגיר	grain	דגניים	Gramineae	3	3			כן		צריך לבדוק את המינים של חיטה ולראות אם יש כאלה ארוכים
HLZ-17	Elusa	Bar-Oz, Gini and Weissbrod	Daniel Fuks, Yael Slasky	2015	A4	4	4/05a	45	2015-02-01	Bucket Floated		1	שעורה	Hordeum	גרגיר	grain	דגניים	Gramineae	5	5			כן		יעל ויואל ראו
HLZ-17	Elusa	Bar-Oz, Gini and Weissbrod	Daniel Fuks, Yael Slasky	2015	A4	4	4/05a	45	2015-02-01	Bucket Floated		2	דגני		גרגיר				12	12			כן		חלק ניתנים להגדרה
HLZ-17	Elusa	Bar-Oz, Gini and Weissbrod	Daniel Fuks, Yael Slasky	2015	A4	4	4/05a	45	2015-02-01	Bucket Floated		3	דגני		שברי גרגיר				12	12			כן
HLZ-17	Elusa	Bar-Oz, Gini and Weissbrod	Daniel Fuks, Yael Slasky	2015	A4	4	4/05a	45	2015-02-15	Bucket Floated		4	דגני		פרקים	culm nodes	דגניים		5	5			כן
HLZ-17	Elusa	Bar-Oz, Gini and Weissbrod	Daniel Fuks, Yael Slasky	2015	A4	4	4/05a	45	2015-02-15	Bucket Floated		5	דגני		בסיס מלען??				1	1			כן
HLZ-17	Elusa	Bar-Oz, Gini and Weissbrod	Daniel Fuks, Yael Slasky	2015	A4	4	4/05a	45	2015-02-01	Bucket Floated		6	דגני		ענף/פרק		דגניים		1	1			לא	כן
HLZ-17	Elusa	Bar-Oz, Gini and Weissbrod	Daniel Fuks, Yael Slasky	2015	A4	4	4/05a	45	2015-02-01	Bucket Floated		7	דגני		פרק ציר שיבולת	rachis fragment	דגניים	Gramineae	46	46			כן		חלק ניתנים להגדרה					שעורה 6-טורית, דו-טורית וחיטה טטרפלוידית
HLZ-17	Elusa	Bar-Oz, Gini and Weissbrod	Daniel Fuks, Yael Slasky	2015	A4	4	4/05a	45	2015-02-01	Bucket Floated		8	גפן	Vitis vinifera	חרצן	pip	גפניים	Vitaceae	8	8			חלק	לא	6 אנדוספרמים, ספירה לפי MNI
HLZ-17	Elusa	Bar-Oz, Gini and Weissbrod	Daniel Fuks, Yael Slasky	2015	A4	4	4/05a	45	2015-02-01	Bucket Floated		9	תמר	Phoenix dactylifera	גלעין	seed	דקליים	Palmae	1	1			כן		הופרד למסירה לגיל זאבי
HLZ-17	Elusa	Bar-Oz, Gini and Weissbrod	Daniel Fuks, Yael Slasky	2015	A4	4	4/05a	45	2015-02-01	Bucket Floated		10	זית	Olea europaea	גלעין	pit	זיתיים	Oleaceae	2	2			לא לגמרי	לא	ספירה על בסיס MNI
HLZ-17	Elusa	Bar-Oz, Gini and Weissbrod	Daniel Fuks, Yael Slasky	2015	A4	4	4/05a	45	2015-02-01	Bucket Floated		11	פיקוס התאנה	Ficus carica			תותיים	Moraceae	28	28			2 לא
HLZ-17	Elusa	Bar-Oz, Gini and Weissbrod	Daniel Fuks, Yael Slasky	2015	A4	4	4/05a	45	2015-02-01	Bucket Floated		12	תאנה?		ציפה?				5	5			כולל 2 מחוברים לציפה/גלל		??תאנה/שקמה
HLZ-17	Elusa	Bar-Oz, Gini and Weissbrod	Daniel Fuks, Yael Slasky	2015	A4	4	4/05a	45	2015-02-01	Bucket Floated		13	דגני		שברי מלען				8	8
HLZ-17	Elusa	Bar-Oz, Gini and Weissbrod	Daniel Fuks, Yael Slasky	2015	A4	4	4/05a	45	2015-02-01	Bucket Floated		14	בן-שלח	Reboudia pinnata	זרע בתרמיל	seed in pod	מצליבים	Brassicaceae	2	2			כן
HLZ-17	Elusa	Bar-Oz, Gini and Weissbrod	Daniel Fuks, Yael Slasky	2015	A4	4	4/05a	45	2015-02-01	Bucket Floated		15	מתנן שעיר	Thymelaea hirsuta	אגוזית				6	6			כן
HLZ-17	Elusa	Bar-Oz, Gini and Weissbrod	Daniel Fuks, Yael Slasky	2015	A4	4	4/05a	45	2015-02-15	Bucket Floated		16	מתנן שעיר	Thymelaea hirsuta	עלים				132	132			רק 20		כולל 23 מפוחמים, 109 לא מפוחמים. האחרון כולל 11 עוקצים גדולים מ1/3. הספירה מייצגת, MNIשמרנית
HLZ-17	Elusa	Bar-Oz, Gini and Weissbrod	Daniel Fuks, Yael Slasky	2015	A4	4	4/05a	45	2015-02-15	Bucket Floated		17	בלתי מזוהה		עלים				7	7			כן		השווה ל-15-22
HLZ-17	Elusa	Bar-Oz, Gini and Weissbrod	Daniel Fuks, Yael Slasky	2015	A4	4	4/05a	45	2015-02-01	Bucket Floated		18	עלי לענה?	Artemisia??	עלים				17	17			כן		השווה ל-15-23
HLZ-17	Elusa	Bar-Oz, Gini and Weissbrod	Daniel Fuks, Yael Slasky	2015	A4	4	4/05a	45	2015-02-01	Bucket Floated		19	בלתי מזוהה		עלים				2	2			כן		קוץ מעניין
HLZ-17	Elusa	Bar-Oz, Gini and Weissbrod	Daniel Fuks, Yael Slasky	2015	A4	4	4/05a	45	2015-02-01	Bucket Floated		20	אשל הפרקים	Tamarix aphylla	פרקים				2	2			כן
HLZ-17	Elusa	Bar-Oz, Gini and Weissbrod	Daniel Fuks, Yael Slasky	2015	A4	4	4/05a	45	2015-02-01	Bucket Floated		21	דבקה	Galium	פרודה		פואתיים	Rubiaceae	1	1			כן
HLZ-17	Elusa	Bar-Oz, Gini and Weissbrod	Daniel Fuks, Yael Slasky	2015	A4	4	4/05a	45	2015-02-01	Bucket Floated		22	אהל מצוי	Mesembryanthemum nodiflorum	פרי				1	1			לא	כן
HLZ-17	Elusa	Bar-Oz, Gini and Weissbrod	Daniel Fuks, Yael Slasky	2015	A4	4	4/05a	45	2015-02-01	Bucket Floated		23	חיעד ספרדי	Aizoon hispanicum	פרי				6	6
HLZ-17	Elusa	Bar-Oz, Gini and Weissbrod	Daniel Fuks, Yael Slasky	2015	A4	4	4/05a	45	2015-02-01	Bucket Floated		24	בסיה?	Bassia?					1	1			כן		לחבר בהמשך
HLZ-17	Elusa	Bar-Oz, Gini and Weissbrod	Daniel Fuks, Yael Slasky	2015	A4	4	4/05a	45	2015-02-01	Bucket Floated		25	מקור חסידה?	Erodium?	מלען				1	1	או ש"ש?		כן		להמשך
HLZ-17	Elusa	Bar-Oz, Gini and Weissbrod	Daniel Fuks, Yael Slasky	2015	A4	4	4/05a	45	2015-02-01	Bucket Floated		26	בלתי מזוהה		ניצן?				2	2			כן		יש תקדימים לעיל. לחבר בהמשך
HLZ-17	Elusa	Bar-Oz, Gini and Weissbrod	Daniel Fuks, Yael Slasky	2015	A4	4	4/05a	45	2015-02-01	Bucket Floated		27	בלתי מזוהה		ניצנים				18	18			כן		שונות. יש תקדימים
HLZ-17	Elusa	Bar-Oz, Gini and Weissbrod	Daniel Fuks, Yael Slasky	2015	A4	4	4/05a	45	2015-02-01	Bucket Floated		28	בלתי מזוהה		קליפות								כן		אולי גפן?
HLZ-17	Elusa	Bar-Oz, Gini and Weissbrod	Daniel Fuks, Yael Slasky	2015	A4	4	4/05a	45	2015-02-01	Bucket Floated		29	נונאה/בטנונית	Nonea/Gastrocotyle	?				2	2			כן		נראה קצת מעניין
HLZ-17	Elusa	Bar-Oz, Gini and Weissbrod	Daniel Fuks, Yael Slasky	2015	A4	4	4/05a	45	2015-02-01	Bucket Floated		30	בלתי מזוהה		שונות				20	עשרות			לרוב		ללא כיוון שלי	כולל אולי אגוזיות תאנה ועוד
HLZ-17	Elusa	Bar-Oz, Gini and Weissbrod	Daniel Fuks, Yael Slasky	2015	A4	4	4/05a	45	2015-02-01	Bucket Floated		31	גלעינית זעירת פרחים	Buglossoides tenuiflora	זרע/פרודה				1	1			לא		דומה גם לגלעינית השדה אך בסיס שונה מעט
HLZ-17	Elusa	Bar-Oz, Gini and Weissbrod	Daniel Fuks, Yael Slasky	2015	A4	4	4/05a	45	2015-02-01	Bucket Floated		32	גפן?		עוקצים				4	4		2 כן	כן		לטפל ולחבר בהזדמנות
HLZ-17	Elusa	Bar-Oz, Gini and Weissbrod	Daniel Fuks, Yael Slasky	2015	A4	4	4/05a	45	2015-02-15	Bucket Floated		33	זנב עקרב שיכני	Scorpiurus muricatus	זרע				1	1		כן	כן		יואל הגדיר
HLZ-17	Elusa	Bar-Oz, Gini and Weissbrod	Daniel Fuks, Yael Slasky	2015	A4	4	4/05a	45	2015-02-15	Bucket Floated		34	קטנית קטנה ועגולה		זרע	seed	פרפרניים	Fabaceae	2	2			כן		לחבר ולזהות בהמשך
HLZ-17	Elusa	Bar-Oz, Gini and Weissbrod	Daniel Fuks, Yael Slasky	2015	A4	4	4/05a	45	2015-02-01	Bucket Floated		35	בלתי מזוהה		זרע				1	1			כן		לא לעכשיו		בקבוצה של לוטוסים- תלתן? שברק? שאלה אם שווה להשקיע
HLZ-17	Elusa	Bar-Oz, Gini and Weissbrod	Daniel Fuks, Yael Slasky	2015	A4	4	4/05a	45	2015-02-01	Bucket Floated		36	בלתי מזוהה		זרע				1	1			כן		בר זיהוי
HLZ-17	Elusa	Bar-Oz, Gini and Weissbrod	Daniel Fuks, Yael Slasky	2015	A4	4	4/05a	45	2015-02-01	Bucket Floated		37	עוקץ-עקרב	Heliotropium	זרע				1	1			כן
HLZ-17	Elusa	Bar-Oz, Gini and Weissbrod	Daniel Fuks, Yael Slasky	2015	A4	4	4/05a	45	2015-02-01	Bucket Floated		38	תלתן?	Trifolium?	זרע				1	1		לא	כן		אולי יצטרף
HLZ-17	Elusa	Bar-Oz, Gini and Weissbrod	Daniel Fuks, Yael Slasky	2015	A4	4	4/05a	45	2015-02-01	Bucket Floated		39	בלתי מזוהה		זרע?				3	3	להגדיר בהמשך		כן		יואל ראה ולא מצא עניין
HLZ-17	Elusa	Bar-Oz, Gini and Weissbrod	Daniel Fuks, Yael Slasky	2015	A4	4	4/05a	45	2015-02-01	Bucket Floated		40	בלתי מזוהה		זרע?				1	1			כן		שברק??
HLZ-17	Elusa	Bar-Oz, Gini and Weissbrod	Daniel Fuks, Yael Slasky	2015	A4	4	4/05a	45	2015-02-01	Bucket Floated		41	בלתי מזוהה		זרע?				10	10			כן				יש קטנית אחת עם הילום שאפשר לאחז בו
HLZ-17	Elusa	Bar-Oz, Gini and Weissbrod	Daniel Fuks, Yael Slasky	2015	A4	4	4/05a	45	2015-02-01	Bucket Floated		42	בלתי מזוהה		זרע?				15	15			כן		יואל אמר לא להתעסק אבל נראה לי שיש כאן כמה ברי זיהוי
HLZ-17	Elusa	Bar-Oz, Gini and Weissbrod	Daniel Fuks, Yael Slasky	2015	A4	4	4/05a	45	2015-02-01	Bucket Floated		43	עדשה תרבותית cf.	Lens culinaris cf.	זרע	seed	פרפרניים	Fabaceae	1	1			כן		באישור יעל
HLZ-17	Elusa	Bar-Oz, Gini and Weissbrod	Daniel Fuks, Yael Slasky	2015	A4	4	4/05a		2015-02-01			44	בר - אכנעי שיחני	Echiochilon fruticosum					1	1	1mm
HLZ-17	Elusa	Bar-Oz, Gini and Weissbrod	Daniel Fuks, Yael Slasky	2015	A4	4	4/05a		2015-02-01			45	שעורה דו-טורית	Hordeum vulgare distichum/spontaneum		rachis fragments			1	1
HLZ-17	Elusa	Bar-Oz, Gini and Weissbrod	Daniel Fuks, Yael Slasky	2015	A4	4	4/05a		2015-02-01			46	בלתי - שונות								1mm
HLZ-17	Elusa	Bar-Oz, Gini and Weissbrod	Daniel Fuks, Yael Slasky	2015	A4	4	4/05a		2015-02-01			47	זית	Olea europaea	זרע	seed			2	2	1mm
HLZ-17	Elusa	Bar-Oz, Gini and Weissbrod	Daniel Fuks, Yael Slasky	2015	A4	4	4/05a		2015-02-01			48				culm nodes			1	1	1mm
HLZ-17	Elusa	Bar-Oz, Gini and Weissbrod	Daniel Fuks, Yael Slasky	2015	A4	4	4/05a		2015-02-01			49	תאנה?	Ficus carica?	ציפה?				1	1
HLZ-18	Elusa	Bar-Oz, Gini and Weissbrod	Daniel Fuks, Yael Slasky	2015	A4	4	4/05a	45	2015-02-01	Bucket Floated		1	שעורה	Hordeum	גרגיר	grain	דגניים	Gramineae	15	15			כן		יעל ראתה	כולל חתיכה שלא נספרו
HLZ-18	Elusa	Bar-Oz, Gini and Weissbrod	Daniel Fuks, Yael Slasky	2015	A4	4	4/05a	45	2015-02-01	Bucket Floated		2	חיטה	Triticum	גרגיר	grain	דגניים	Gramineae	1	1			כן
HLZ-18	Elusa	Bar-Oz, Gini and Weissbrod	Daniel Fuks, Yael Slasky	2015	A4	4	4/05a	45	2015-02-01	Bucket Floated		3	חיטה/שעורה	Hordeum cf. Triticum	גרגיר	grain	דגניים	Gramineae	9	9			כן		חיטה או שעורה	אולי גם דגן אחר
HLZ-18	Elusa	Bar-Oz, Gini and Weissbrod	Daniel Fuks, Yael Slasky	2015	A4	4	4/05a	45	2015-02-01	Bucket Floated		4	דגני		שברי גרגיר				29	29			כן
HLZ-18	Elusa	Bar-Oz, Gini and Weissbrod	Daniel Fuks, Yael Slasky	2015	A4	4	4/05a	45	2015-02-01	Bucket Floated		5	גפן	Vitis vinifera	חרצן	pip	גפניים	Vitaceae	5	5			למעט אנדוספרם אחד		MNI=6	3שלמים, אנדוספרם וחצי ואחד בשברים
HLZ-18	Elusa	Bar-Oz, Gini and Weissbrod	Daniel Fuks, Yael Slasky	2015	A4	4	4/05a	45	2015-02-01	Bucket Floated		6	גפן?		קליפות				12	12			כן
HLZ-18	Elusa	Bar-Oz, Gini and Weissbrod	Daniel Fuks, Yael Slasky	2015	A4	4	4/05a	45	2015-02-01	Bucket Floated		7	פיקוס התאנה	Ficus carica	אגוזית וציפה	nutlet and fruit fragment	תותיים	Moraceae	42	42			אחד לא		כולל 2 חלקי ציפה עם 2 אגוזיות ועד שניים עם 3
HLZ-18	Elusa	Bar-Oz, Gini and Weissbrod	Daniel Fuks, Yael Slasky	2015	A4	4	4/05a	45	2015-02-01	Bucket Floated		8	מתנן שעיר	Thymelaea hirsuta	פרי				10	10			לא ברור		אחד בקליפה
HLZ-18	Elusa	Bar-Oz, Gini and Weissbrod	Daniel Fuks, Yael Slasky	2015	A4	4	4/05a	45	2015-02-01	Bucket Floated		9	מתנן שעיר	Thymelaea hirsuta	עלים/ניצנים				17	17			אחד לא ויפה!		10חלקים, בהם עוד כ25 עלים
HLZ-18	Elusa	Bar-Oz, Gini and Weissbrod	Daniel Fuks, Yael Slasky	2015	A4	4	4/05a	45	2015-02-01	Bucket Floated		10	מתנן שעיר	Thymelaea hirsuta	עלים מפוחמים				65	65			כן		שים לב שזה רק המפוחמים
HLZ-18	Elusa	Bar-Oz, Gini and Weissbrod	Daniel Fuks, Yael Slasky	2015	A4	4	4/05a	45	2015-02-01	Bucket Floated		11	מתנן שעיר	Thymelaea hirsuta	עלים לא מפוחמים				635	635			לא		עלים בודדים. עלים בזוגות במבחנה 18-9
HLZ-18	Elusa	Bar-Oz, Gini and Weissbrod	Daniel Fuks, Yael Slasky	2015	A4	4	4/05a	45	2015-02-01	Bucket Floated		12	בלתי מזוהה		עלים/ניצנים				3	3			כן		להגדיר בהמשך
HLZ-18	Elusa	Bar-Oz, Gini and Weissbrod	Daniel Fuks, Yael Slasky	2015	A4	4	4/05a	45	2015-02-01	Bucket Floated		13	בלתי מזוהה		עלים/ניצנים				5	5			כן		להגדיר בהמשך
HLZ-18	Elusa	Bar-Oz, Gini and Weissbrod	Daniel Fuks, Yael Slasky	2015	A4	4	4/05a	45	2015-02-01	Bucket Floated		14	בלתי מזוהה		עלים/ניצנים				15	15			כן		להגדיר בהמשך
HLZ-18	Elusa	Bar-Oz, Gini and Weissbrod	Daniel Fuks, Yael Slasky	2015	A4	4	4/05a	45	2015-02-01	Bucket Floated		15	בלתי מזוהה		שברי גללים ואולי ציפה				15	15			כן
HLZ-18	Elusa	Bar-Oz, Gini and Weissbrod	Daniel Fuks, Yael Slasky	2015	A4	4	4/05a	45	2015-02-01	Bucket Floated		16	בלתי מזוהה		שונות				20	עשרות			לרוב		כולל סיבים מעניינים
HLZ-18	Elusa	Bar-Oz, Gini and Weissbrod	Daniel Fuks, Yael Slasky	2015	A4	4	4/05a	45	2015-02-01	Bucket Floated		17	דגני		גלומות				5	5			כן		אחד עם גרגיר
HLZ-18	Elusa	Bar-Oz, Gini and Weissbrod	Daniel Fuks, Yael Slasky	2015	A4	4	4/05a	45	2015-02-01	Bucket Floated		18	דגני		שברי מלען				69	69			18 לא		כולל ממינים שונים
HLZ-18	Elusa	Bar-Oz, Gini and Weissbrod	Daniel Fuks, Yael Slasky	2015	A4	4	4/05a	45	2015-02-01	Bucket Floated		19	דגני		פרקי דגן				36	36			כן		כולל 2 מאזור השורש
HLZ-18	Elusa	Bar-Oz, Gini and Weissbrod	Daniel Fuks, Yael Slasky	2015	A4	4	4/05a	45	2015-02-01	Bucket Floated		20	דגני		גרגיר				1	1			כן		קטן. אולי לחבר בהמשך
HLZ-18	Elusa	Bar-Oz, Gini and Weissbrod	Daniel Fuks, Yael Slasky	2015	A4	4	4/05a	45	2015-02-01	Bucket Floated		21	דגן		פרק ציר שיבולת	rachis fragment	דגניים	Gramineae	120	120			כן		זה והספירות לעיל של חלקי שדרה הינו לפי חלקים מזוהים כמוNISP					שעורה 6-טורית, דו-טורית וחיטה טטרפלוידית
HLZ-18	Elusa	Bar-Oz, Gini and Weissbrod	Daniel Fuks, Yael Slasky	2015	A4	4	4/05a	45	2015-02-01	Bucket Floated		22	בלתי מזוהה		זרד?				3	3			כן		זרדים, ענפים
HLZ-18	Elusa	Bar-Oz, Gini and Weissbrod	Daniel Fuks, Yael Slasky	2015	A4	4	4/05a	45	2015-02-15	Bucket Floated		23	בלתי מזוהה		קליפת ענף?				9	9			כן
HLZ-18	Elusa	Bar-Oz, Gini and Weissbrod	Daniel Fuks, Yael Slasky	2015	A4	4	4/05a	45	2015-02-15	Bucket Floated		24	בלתי מזוהה		עלים/קוצים				6	6			כן
HLZ-18	Elusa	Bar-Oz, Gini and Weissbrod	Daniel Fuks, Yael Slasky	2015	A4	4	4/05a	45	2015-02-01	Bucket Floated		25	בלתי מזוהה		עלים/קוצים				45	45			כן
HLZ-18	Elusa	Bar-Oz, Gini and Weissbrod	Daniel Fuks, Yael Slasky	2015	A4	4	4/05a	45	2015-02-01	Bucket Floated		26	בלתי מזוהה		שונות				14	14			כן		לחזור לזה כולל פרק/עלה דמוי אשל
HLZ-18	Elusa	Bar-Oz, Gini and Weissbrod	Daniel Fuks, Yael Slasky	2015	A4	4	4/05a	45	2015-02-01	Bucket Floated		27	בלתי מזוהה		שונות								לא				לא להתעסק
HLZ-18	Elusa	Bar-Oz, Gini and Weissbrod	Daniel Fuks, Yael Slasky	2015	A4	4	4/05a	45	2015-02-01	Bucket Floated		28	פרגה ערבית	Glaucium arabicum	זרע	seeds	פרגיים	Papaveraceae	1	1			כן		זיהוי על בסיס צורה וגודל
HLZ-18	Elusa	Bar-Oz, Gini and Weissbrod	Daniel Fuks, Yael Slasky	2015	A4	4	4/05a	45	2015-02-01	Bucket Floated		29	ארנבית שרועה	Arnebia decumbens	זרע/פרודה	seeds	זיפניים	Boraginaceae	1	1			לא	לא	זיהוי שלי על בסיס הבסיס
HLZ-18	Elusa	Bar-Oz, Gini and Weissbrod	Daniel Fuks, Yael Slasky	2015	A4	4	4/05a	45	2015-02-01	Bucket Floated		30	בן-שלח מנוצה	Reboudia pinnata	זרעים בתרמיל		מצליבים	Brassicaceae	5	5			כן		אחד נשבר. אחד תחתית שלוש קצוות של תרמיל.
HLZ-18	Elusa	Bar-Oz, Gini and Weissbrod	Daniel Fuks, Yael Slasky	2015	A4	4	4/05a	45	2015-02-01	Bucket Floated		31	זית	Olea europaea	אנדוספרם	endosperm	זיתיים	Oleaceae	1	1		לא	כן
HLZ-18	Elusa	Bar-Oz, Gini and Weissbrod	Daniel Fuks, Yael Slasky	2015	A4	4	4/05a	45	2015-02-01	Bucket Floated		32	בקבוקון מקומט	Rapistrum rugosum	פרי/אגוזית?		מצליבים	Brassicaceae	1	1			כן
HLZ-18	Elusa	Bar-Oz, Gini and Weissbrod	Daniel Fuks, Yael Slasky	2015	A4	4	4/05a	45	2015-02-01	Bucket Floated		33	סלק מצוי	Beta vulgaris	פרי				1	1			כן
HLZ-18	Elusa	Bar-Oz, Gini and Weissbrod	Daniel Fuks, Yael Slasky	2015	A4	4	4/05a	45	2015-02-01	Bucket Floated		34	בקיים	Viceae	פסיג	cotyledon	פרפרניים	Fabaceae	1	1			כן		חצי, אולי כרשינה
HLZ-18	Elusa	Bar-Oz, Gini and Weissbrod	Daniel Fuks, Yael Slasky	2015	A4	4	4/05a	45	2015-02-15	Bucket Floated		35	בלתי מזוהה						1	1			כן		יעל: חור שהתרחב. לא ברור	לא להתעסק
HLZ-18	Elusa	Bar-Oz, Gini and Weissbrod	Daniel Fuks, Yael Slasky	2015	A4	4	4/05a	45	2015-02-15	Bucket Floated		36	בקיה תרבותית cf. ארצישראלית	Vicia palaestina cf. sativa	זרע	seed	פרפרניים	Fabaceae	1	1			כן		על פי עבודתי עם המגדיר והאוסף
HLZ-18	Elusa	Bar-Oz, Gini and Weissbrod	Daniel Fuks, Yael Slasky	2015	A4	4	4/05a	45	2015-02-01	Bucket Floated		37	בלתי מזוהה		זרע?			חלבלוביים?	1	1			כן		בדקתי בחלבלוב אך לא ראיתי במה לאחוז		לבדוק חלבלוב
HLZ-18	Elusa	Bar-Oz, Gini and Weissbrod	Daniel Fuks, Yael Slasky	2015	A4	4	4/05a	45	2015-02-01	Bucket Floated		38	בלתי מזוהה		?				1	1			כן		יש כזה בסלים קודמים. לבדוק את הצמח שאספתי ושמתי באוטו
HLZ-18	Elusa	Bar-Oz, Gini and Weissbrod	Daniel Fuks, Yael Slasky	2015	A4	4	4/05a	45	2015-02-01	Bucket Floated		39	ארכוביתי?		ענבה				1	1	בלתי בינתיים		כן		שווה להתעסק איתו
HLZ-18	Elusa	Bar-Oz, Gini and Weissbrod	Daniel Fuks, Yael Slasky	2015	A4	4	4/05a	45	2015-02-01	Bucket Floated		40	דגני		גרגיר			דגניים	1	1			כן		עטוי. לחבר בהמשך
HLZ-18	Elusa	Bar-Oz, Gini and Weissbrod	Daniel Fuks, Yael Slasky	2015	A4	4	4/05a	45	2015-02-01	Bucket Floated		41	סוככי?					Apiaceae	2	2			כן
HLZ-18	Elusa	Bar-Oz, Gini and Weissbrod	Daniel Fuks, Yael Slasky	2015	A4	4	4/05a	45	2015-02-01	Bucket Floated		42	גפן?		חרצן לא מפותח?				1	1			כן
HLZ-18	Elusa	Bar-Oz, Gini and Weissbrod	Daniel Fuks, Yael Slasky	2015	A4	4	4/05a	45	2015-02-01	Bucket Floated		43	בלתי מזוהה		פרי מצומק?				2	2			אחד לא אחד אולי		צימוק?		צריך לפרק כדי לבדוק
HLZ-18	Elusa	Bar-Oz, Gini and Weissbrod	Daniel Fuks, Yael Slasky	2015	A4	4	4/05a	45	2015-02-01	Bucket Floated		44	גרגרנית ערבית	Trigonella arabica	זרע				1	1			כן				מזוהה	ראה במחברת
HLZ-18	Elusa	Bar-Oz, Gini and Weissbrod	Daniel Fuks, Yael Slasky	2015	A4	4	4/05a	45	2015-02-01	Bucket Floated		45	גרגרנית ערבית?		זרע				3	3			כן		לא ברור לי אם מצטרף לנ"ל, השתמרות לא מושלמת
HLZ-18	Elusa	Bar-Oz, Gini and Weissbrod	Daniel Fuks, Yael Slasky	2015	A4	4	4/05a	45	2015-02-01	Bucket Floated		46	בלתי מזוהה		?				1	1			כן		לא זה ולא זה		ברוניקה לבנה או חספסנית מחוספסת
HLZ-18	Elusa	Bar-Oz, Gini and Weissbrod	Daniel Fuks, Yael Slasky	2015	A4	4	4/05a	45	2015-02-01	Bucket Floated		47	בלתי מזוהה		?				1	1			כן
HLZ-18	Elusa	Bar-Oz, Gini and Weissbrod	Daniel Fuks, Yael Slasky	2015	A4	4	4/05a	45	2015-02-01	Bucket Floated		48	ארכוביתי להגדרה		?				1	1			כן
HLZ-18	Elusa	Bar-Oz, Gini and Weissbrod	Daniel Fuks, Yael Slasky	2015	A4	4	4/05a	45	2015-02-01	Bucket Floated		49	פיגמית cf. מגובששת	Haplophyllum cf. tuberculatum	זרע בהלקט		פיגמיים	Rutaceae	1	1			כן
HLZ-18	Elusa	Bar-Oz, Gini and Weissbrod	Daniel Fuks, Yael Slasky	2015	A4	4	4/05a	45	2015-02-01	Bucket Floated		50	בלתי מזוהה		?				1	1			כן
HLZ-18	Elusa	Bar-Oz, Gini and Weissbrod	Daniel Fuks, Yael Slasky	2015	A4	4	4/05a	45	2015-02-01	Bucket Floated		51	בלתי מזוהה		?				2	2			כן
HLZ-18	Elusa	Bar-Oz, Gini and Weissbrod	Daniel Fuks, Yael Slasky	2015	A4	4	4/05a	45	2015-02-15	Bucket Floated		52	בלתי מזוהה		?				8	8			כן
HLZ-18	Elusa	Bar-Oz, Gini and Weissbrod	Daniel Fuks, Yael Slasky	2015	A4	4	4/05a	45	2015-02-15	Bucket Floated		53	בלתי מזוהה		?				2	2			כן
HLZ-18	Elusa	Bar-Oz, Gini and Weissbrod	Daniel Fuks, Yael Slasky	2015	A4	4	4/05a	45	2015-02-01	Bucket Floated		54	בלתי מזוהה		?				2	2			כן
HLZ-18	Elusa	Bar-Oz, Gini and Weissbrod	Daniel Fuks, Yael Slasky	2015	A4	4	4/05a	45	2015-02-01	Bucket Floated		55	בלתי מזוהה		?				4	4			כן
HLZ-18	Elusa	Bar-Oz, Gini and Weissbrod	Daniel Fuks, Yael Slasky	2015	A4	4	4/05a	45	2015-02-01	Bucket Floated		56	בלתי מזוהה		?								כן
HLZ-18	Elusa	Bar-Oz, Gini and Weissbrod	Daniel Fuks, Yael Slasky	2015	A4	4	4/05a	45	2015-02-01	Bucket Floated		57	קטנית		זרע	seed	פרפרניים	Fabaceae	1	1	אולי זנב-עקרב		כן		חילבה אולי קדד
HLZ-18	Elusa	Bar-Oz, Gini and Weissbrod	Daniel Fuks, Yael Slasky	2015	A4	4	4/05a	45	2015-02-01	Bucket Floated		58	קטנית		זרע	seed	פרפרניים	Fabaceae	2	2			כן		רק אם מצטרף		לא לעכשיו
HLZ-18	Elusa	Bar-Oz, Gini and Weissbrod	Daniel Fuks, Yael Slasky	2015	A4	4	4/05a	45	2015-02-01	Bucket Floated		59	תאנה?	Ficus carica?	אגוזית על ציפה				1	1
HLZ-18	Elusa	Bar-Oz, Gini and Weissbrod	Daniel Fuks, Yael Slasky	2015	A4	4	4/05a	45	2015-02-01	Bucket Floated		60	עוקץ גפן	Vitis vinifera	עוקץ	pedicel			1	1
HLZ-18	Elusa	Bar-Oz, Gini and Weissbrod	Daniel Fuks, Yael Slasky	2015	A4	4	4/05a	45	2015-02-01	Bucket Floated		61				culm nodes
HLZ-18	Elusa	Bar-Oz, Gini and Weissbrod	Daniel Fuks, Yael Slasky	2015	A4	4	4/05a	45	2015-02-01	Bucket Floated		62	זית??						1	1
HLZ-18	Elusa	Bar-Oz, Gini and Weissbrod	Daniel Fuks, Yael Slasky	2015	A4	4	4/05a	45	2015-02-01	Bucket Floated		63	דגני			rachis fragment			1	1										לא בר הגדרה
HLZ-18	Elusa	Bar-Oz, Gini and Weissbrod	Daniel Fuks, Yael Slasky	2015	A4	4	4/05a	45	2015-02-01			64				basal rachi unID
HLZ-18	Elusa	Bar-Oz, Gini and Weissbrod	Daniel Fuks, Yael Slasky	2015	A4	4	4/05a	45	2015-02-01			65	מתנן שעיר	Thymelaea hirsuta	עלה	leaf
HLZ-18	Elusa	Bar-Oz, Gini and Weissbrod	Daniel Fuks, Yael Slasky	2015	A4	4	4/05a	45	2015-02-01			66	גלל						2	2
HLZ-18	Elusa	Bar-Oz, Gini and Weissbrod	Daniel Fuks, Yael Slasky	2015	A4	4	4/05a	45	2015-02-01			67	בלתי - שונות
HLZ-19	Elusa	Bar-Oz, Gini and Weissbrod	Daniel Fuks, Yael Slasky	2015	A1	1	1/05a	29	2015-02-01	Wet Sieve Picking	16	1	שעורה	Hordeum	גרגיר	grain	דגניים	Gramineae	3	3		כן	כן	לא				1/06a?, 33?
HLZ-2	Elusa	Bar-Oz, Gini and Weissbrod	Daniel Fuks, Yael Slasky	2015	A4	4	4/04a	37	2015-02-01	Wet Sieve Picking		1	שעורה	Hordeum	גרגיר	grain	דגניים	Gramineae	45	45					זיהו ודאי, ע"י יעל
HLZ-2	Elusa	Bar-Oz, Gini and Weissbrod	Daniel Fuks, Yael Slasky	2015	A4	4	4/04a	37	2015-02-01	Wet Sieve Picking		2	חיטה/שעורה	Hordeum cf. Triticum	גרגיר	grain	דגניים	Gramineae	8	8					זיהוי לא ודאי עקב שריפה יתירה, בקטגוריה הזו בכלל הנטייה לשעורה
HLZ-2	Elusa	Bar-Oz, Gini and Weissbrod	Daniel Fuks, Yael Slasky	2015	A4	4	4/04a	37	2015-02-01	Wet Sieve Picking		3	דגני	Avena??	זרע	seed	דגניים	Gramineae	1	1				זיהוי לא ודאי
HLZ-2	Elusa	Bar-Oz, Gini and Weissbrod	Daniel Fuks, Yael Slasky	2015	A4	4	4/04a	37	2015-02-01	Wet Sieve Picking		4	דגני		זרע	seed	דגניים	Gramineae	1	1
HLZ-2	Elusa	Bar-Oz, Gini and Weissbrod	Daniel Fuks, Yael Slasky	2015	A4	4	4/04a	37	2015-02-01	Wet Sieve Picking		5	זון	Lolium	זרע	seed	דגניים	Gramineae	1	1
HLZ-2	Elusa	Bar-Oz, Gini and Weissbrod	Daniel Fuks, Yael Slasky	2015	A4	4	4/04a	37	2015-02-01	Wet Sieve Picking		6	גפן	Vitis vinifera	חרצן	pip	גפניים	Vitaceae	9	9
HLZ-2	Elusa	Bar-Oz, Gini and Weissbrod	Daniel Fuks, Yael Slasky	2015	A4	4	4/04a	37	2015-02-01	Wet Sieve Picking		7	cf. זית	cf. Olea europaea	שבר גלעין	pit fragment	זיתיים	Oleaceae	1	1		לא			שני שברירים
HLZ-2	Elusa	Bar-Oz, Gini and Weissbrod	Daniel Fuks, Yael Slasky	2015	A4	4	4/04a	37	2015-02-01	Wet Sieve Picking		8	עדשה תרבותית	Lens culinaris	זרע	seed	פרפרניים	Fabaceae	2	2			כן		באישור יעל	אחד שלם אחד חצי
HLZ-2	Elusa	Bar-Oz, Gini and Weissbrod	Daniel Fuks, Yael Slasky	2015	A4	4	4/04a	37	2015-02-01	Wet Sieve Picking		9	בקיה קטנה	Vicia sp.	זרע	seed	פרפרניים	Fabaceae	1	1			כן		קטן וכדורי	לבדוק שוב בהמשך
HLZ-2	Elusa	Bar-Oz, Gini and Weissbrod	Daniel Fuks, Yael Slasky	2015	A4	4	4/04a	37	2015-02-01	Wet Sieve Picking		10	דבקה	Galium	פרודה		פואתיים	Rubiaceae	1	1				לזיהוי
HLZ-2	Elusa	Bar-Oz, Gini and Weissbrod	Daniel Fuks, Yael Slasky	2015	A4	4	4/04a	37	2015-02-01	Wet Sieve Picking		11	דבקה?	Galium?	פרודה		פואתיים	Rubiaceae	1	1				שבורה
HLZ-2	Elusa	Bar-Oz, Gini and Weissbrod	Daniel Fuks, Yael Slasky	2015	A4	4	4/04a	37	2015-02-01	Wet Sieve Picking		12	מתנן שעיר	Thymelaea hirsuta	פרי	fruit	מתנניים	Thymelaceae	2	2
HLZ-2	Elusa	Bar-Oz, Gini and Weissbrod	Daniel Fuks, Yael Slasky	2015	A4	4	4/04a	37	2015-02-01	Wet Sieve Picking		13	בלתי מזוהה		?				7	7	חותם תמר או כתר רימון?	קטנית אחת כנראה
HLZ-20	Elusa	Bar-Oz, Gini and Weissbrod	Daniel Fuks, Yael Slasky	2015	A1	1	1/06a	33	2015-02-01	Wet Sieve Picking		1	שעורה	Hordeum	גרגיר	grain	דגניים	Gramineae	12	12		כן	כן	לא
HLZ-20	Elusa	Bar-Oz, Gini and Weissbrod	Daniel Fuks, Yael Slasky	2015	A1	1	1/06a	33	2015-02-01	Wet Sieve Picking		2	חיטה	Triticum	גרגיר	grain	דגניים	Gramineae	1	1			כן
HLZ-20	Elusa	Bar-Oz, Gini and Weissbrod	Daniel Fuks, Yael Slasky	2015	A1	1	1/06a	33	2015-02-01	Wet Sieve Picking		3	חיטה/שעורה	Hordeum cf. Triticum	גרגיר	grain	דגניים	Gramineae	6	6			כן		אחד נראה לי חיטה
HLZ-20	Elusa	Bar-Oz, Gini and Weissbrod	Daniel Fuks, Yael Slasky	2015	A1	1	1/06a	33	2015-02-01	Wet Sieve Picking		4	גפן	Vitis vinifera	חרצן	pip	גפניים	Vitaceae	31	31			כן		על בסיס עוקצי חרצן
HLZ-20	Elusa	Bar-Oz, Gini and Weissbrod	Daniel Fuks, Yael Slasky	2015	A1	1	1/06a	33	2015-02-01	Wet Sieve Picking		5	מתנן שעיר	Thymelaea hirsuta	אגוזית				11	11			כנראה
HLZ-20	Elusa	Bar-Oz, Gini and Weissbrod	Daniel Fuks, Yael Slasky	2015	A1	1	1/06a	33	2015-02-01	Wet Sieve Picking		6	עדשה תרבותית	Lens culinaris	זרע	seed	פרפרניים	Fabaceae	1	1			כן		באישור יעל	בדקתי תורמוס וזה לא מתאים	עדשה? לבדוק תורמוס
HLZ-20	Elusa	Bar-Oz, Gini and Weissbrod	Daniel Fuks, Yael Slasky	2015	A1	1	1/06a	33	2015-02-01	Wet Sieve Picking		7	טופח	Lathyrus sect. cicercula	זרע	seed	פרפרניים	Fabaceae	1	1			כן		איפה הטבורית?
HLZ-20	Elusa	Bar-Oz, Gini and Weissbrod	Daniel Fuks, Yael Slasky	2015	A1	1	1/06a	33	2015-02-01	Wet Sieve Picking		8	בלתי מזוהה						2	2			כן
HLZ-20	Elusa	Bar-Oz, Gini and Weissbrod	Daniel Fuks, Yael Slasky	2015	A1	1	1/06a	33	2015-02-01	Wet Sieve Picking		9	בלתי מזוהה		זרע				1	1	יואל ראה וזה מעניין. להמשך		כן
HLZ-20	Elusa	Bar-Oz, Gini and Weissbrod	Daniel Fuks, Yael Slasky	2015	A1	1	1/06a	33	2015-02-15	Wet Sieve Picking		10	בלתי מזוהה		זרע				1	1			כן
HLZ-20	Elusa	Bar-Oz, Gini and Weissbrod	Daniel Fuks, Yael Slasky	2015	A1	1	1/06a	33	2015-02-15	Wet Sieve Picking		11	בלתי מזוהה		זרע				1	1			כן				מצטרף לזנב עקרב?
HLZ-21	Elusa	Bar-Oz, Gini and Weissbrod	Daniel Fuks, Yael Slasky	2015	A1	1	1/07a	41	2015-02-01	Wet Sieve Picking		1	שעורה	Hordeum	גרגיר	grain	דגניים	Gramineae	13	13			כן
HLZ-21	Elusa	Bar-Oz, Gini and Weissbrod	Daniel Fuks, Yael Slasky	2015	A1	1	1/07a	41	2015-02-01	Wet Sieve Picking		2	חיטה/שעורה	Hordeum cf. Triticum	גרגיר	grain	דגניים	Gramineae	3	3			כן		שווה לחזור לזה
HLZ-21	Elusa	Bar-Oz, Gini and Weissbrod	Daniel Fuks, Yael Slasky	2015	A1	1	1/07a	41	2015-02-01	Wet Sieve Picking		3	גפן	Vitis vinifera	חרצן	pip	גפניים	Vitaceae	9	9			כן		6 שלמים
HLZ-21	Elusa	Bar-Oz, Gini and Weissbrod	Daniel Fuks, Yael Slasky	2015	A1	1	1/07a	41	2015-02-01	Wet Sieve Picking		4	זית	Olea europaea	גלעין	pit	זיתיים	Oleaceae	1	1			כן
HLZ-21	Elusa	Bar-Oz, Gini and Weissbrod	Daniel Fuks, Yael Slasky	2015	A1	1	1/07a	41	2015-02-01	Wet Sieve Picking		5	מתנן שעיר	Thymelaea hirsuta	אגוזית				2	2			כנראה		1 שלם
HLZ-21	Elusa	Bar-Oz, Gini and Weissbrod	Daniel Fuks, Yael Slasky	2015	A1	1	1/07a	41	2015-02-01	Wet Sieve Picking		6	בלתי מזוהה		שונות				11	11			כן		לא אינדיקטיבי
HLZ-21	Elusa	Bar-Oz, Gini and Weissbrod	Daniel Fuks, Yael Slasky	2015	A1	1	1/07a	41	2015-02-01	Wet Sieve Picking		7	טופח	Lathyrus sect. cicercula	זרע	seed	פרפרניים	Fabaceae	1	1			כן
HLZ-21	Elusa	Bar-Oz, Gini and Weissbrod	Daniel Fuks, Yael Slasky	2015	A1	1	1/07a	41	2015-02-01	Wet Sieve Picking		8	בקיית הכרשינה	Vicia ervilia	זרע	seed	פרפרניים	Fabaceae	3	3			כן
HLZ-21	Elusa	Bar-Oz, Gini and Weissbrod	Daniel Fuks, Yael Slasky	2015	A1	1	1/07a	41	2015-02-01	Wet Sieve Picking		9	בקיים	Vicieae	זרע	seed	פרפרניים	Fabaceae
HLZ-22	Elusa	Bar-Oz, Gini and Weissbrod	Daniel Fuks, Yael Slasky	2015	A1	1	1/07d	67	2015-02-01	Wet Sieve/Coarse sift		1	תמר	Phoenix dactylifera	גלעין	seed	דקליים	Palmae	3	3			כן		הופרד למסירה לגיל זאבי	לא שלמים אבל יותר מחצי
HLZ-23	Elusa	Bar-Oz, Gini and Weissbrod	Daniel Fuks, Yael Slasky	2015	A1	1	1/08a	49	2015-02-15	Wet Sieve Picking		1	שעורה	Hordeum	גרגיר	grain	דגניים	Gramineae	20	20			כן		כנראה שיש עוד במבחנה הבאה
HLZ-23	Elusa	Bar-Oz, Gini and Weissbrod	Daniel Fuks, Yael Slasky	2015	A1	1	1/08a	49	2015-02-15	Wet Sieve Picking		2	חיטה/שעורה	Hordeum cf. Triticum	גרגיר	grain	דגניים	Gramineae	13	13			כן
HLZ-23	Elusa	Bar-Oz, Gini and Weissbrod	Daniel Fuks, Yael Slasky	2015	A1	1	1/08a	49	2015-02-01	Wet Sieve Picking		3	גפן	Vitis vinifera	חרצן	pip	גפניים	Vitaceae	11	11			כן
HLZ-23	Elusa	Bar-Oz, Gini and Weissbrod	Daniel Fuks, Yael Slasky	2015	A1	1	1/08a	49	2015-02-01	Wet Sieve Picking		4	בלתי מזוהה		שונות				11	11			כן
HLZ-23	Elusa	Bar-Oz, Gini and Weissbrod	Daniel Fuks, Yael Slasky	2015	A1	1	1/08a	49	2015-02-01	Wet Sieve Picking		5	דבקה	Galium	פרודה		פואתיים	Rubiaceae	2	2			כן		להגדיר בהמשך
HLZ-23	Elusa	Bar-Oz, Gini and Weissbrod	Daniel Fuks, Yael Slasky	2015	A1	1	1/08a	49	2015-02-01	Wet Sieve Picking		6	מתנן שעיר	Thymelaea hirsuta	זרע	seed	מתנניים	Thymelaceae	3	3			כנראה		שונות תוך-מינית
HLZ-23	Elusa	Bar-Oz, Gini and Weissbrod	Daniel Fuks, Yael Slasky	2015	A1	1	1/08a	49	2015-02-01	Wet Sieve Picking		7	אבטיח הפקועה	Citrullus colocynthis	זרע	seed	דלועיי	Cucurbitaceae	1	1		כן	כן		יואל הגדיר ואני בדקתי את כל הדלועים באוסף. זיהוי על פי חריצים וצורה כללית
HLZ-23	Elusa	Bar-Oz, Gini and Weissbrod	Daniel Fuks, Yael Slasky	2015	A1	1	1/08a	49	2015-02-01	Wet Sieve Picking		8	בלתי מזוהה		זרעים פירות ועוד				8	8			כן		לחבר בהמשך		אחד פחם לפי יעל
HLZ-23	Elusa	Bar-Oz, Gini and Weissbrod	Daniel Fuks, Yael Slasky	2015	A1	1	1/08a	49	2015-02-01	Wet Sieve Picking		9	קטנית קטנה ועגולה		זרע	seed	פרפרניים	Fabaceae	1	1			כן		לחבר בהמשך
HLZ-23	Elusa	Bar-Oz, Gini and Weissbrod	Daniel Fuks, Yael Slasky	2015	A1	1	1/08a	49	2015-02-01	Wet Sieve Picking		10	קטנית קטנה ועגולה		זרע	seed	פרפרניים	Fabaceae	2	2			כן		כולל 2 חצאים שמתחברים	מיעל: לבדוק אם מצטרף למשהו
HLZ-23	Elusa	Bar-Oz, Gini and Weissbrod	Daniel Fuks, Yael Slasky	2015	A1	1	1/08a	49	2015-02-01	Wet Sieve Picking		11	בלתי מזוהה						1	1	להגדיר בהמשך		כן			להגדרה	מעניין, להגדיר בהמשך
HLZ-23	Elusa	Bar-Oz, Gini and Weissbrod	Daniel Fuks, Yael Slasky	2015	A1	1	1/08a	49	2015-02-01	Wet Sieve Picking		12	בקיית הכרשינה	Vicia ervilia	זרע	seed	פרפרניים	Fabaceae	2	2			כן		אחד ברור ואחד מצטרף
HLZ-23	Elusa	Bar-Oz, Gini and Weissbrod	Daniel Fuks, Yael Slasky	2015	A1	1	1/08a	49	2015-02-01	Wet Sieve Picking		13	בקיים	Vicieae	זרע	seed	פרפרניים	Fabaceae	1	1			כן		רק לפי גודל וצורה
HLZ-24	Elusa	Bar-Oz, Gini and Weissbrod	Daniel Fuks, Yael Slasky	2015	A1	1	1/10a	64	2015-02-01	Wet Sieve Picking		1	שעורה	Hordeum	גרגיר	grain	דגניים	Gramineae	17	17			כן
HLZ-24	Elusa	Bar-Oz, Gini and Weissbrod	Daniel Fuks, Yael Slasky	2015	A1	1	1/10a	64	2015-02-01	Wet Sieve Picking		2	חיטה	Triticum	גרגיר	grain	דגניים	Gramineae	2	2			כן
HLZ-24	Elusa	Bar-Oz, Gini and Weissbrod	Daniel Fuks, Yael Slasky	2015	A1	1	1/10a	64	2015-02-01	Wet Sieve Picking		3	חיטה/שעורה	Hordeum cf. Triticum	גרגיר	grain	דגניים	Gramineae	1	1			כן
HLZ-24	Elusa	Bar-Oz, Gini and Weissbrod	Daniel Fuks, Yael Slasky	2015	A1	1	1/10a	64	2015-02-01	Wet Sieve Picking		4	גפן	Vitis vinifera	חרצן	pip	גפניים	Vitaceae	6	6			כן
HLZ-24	Elusa	Bar-Oz, Gini and Weissbrod	Daniel Fuks, Yael Slasky	2015	A1	1	1/10a	64	2015-02-15	Wet Sieve Picking		5	עדשה תרבותית	Lens culinaris	זרע	seed	פרפרניים	Fabaceae	1	1			כן		באישור יעל	אחד לא נספר, מיעל	סיכוי טוב לעדשים
HLZ-24	Elusa	Bar-Oz, Gini and Weissbrod	Daniel Fuks, Yael Slasky	2015	A1	1	1/10a	64	2015-02-15	Wet Sieve Picking		6	עדשה תרבותית	Lens culinaris	זרע	seed	פרפרניים	Fabaceae	1	1			כן		באישור יעל		לבדוק טבורית מול שאר העדשים שלי
HLZ-24	Elusa	Bar-Oz, Gini and Weissbrod	Daniel Fuks, Yael Slasky	2015	A1	1	1/10a	64	2015-02-01	Wet Sieve Picking		7	קטנית		זרע	seed	פרפרניים	Fabaceae	2	2			כן				כנראה לא עדשים
HLZ-24	Elusa	Bar-Oz, Gini and Weissbrod	Daniel Fuks, Yael Slasky	2015	A1	1	1/10a	64	2015-02-01	Wet Sieve Picking		8	שיטת היאור	Acacia nilotica	זרע	seed	שיטיים	Mimosaceae	1	1			כן
HLZ-24	Elusa	Bar-Oz, Gini and Weissbrod	Daniel Fuks, Yael Slasky	2015	A1	1	1/10a	64	2015-02-01	Wet Sieve Picking		9	בלתי מזוהה						1	1			כן				אולי יתחבר בהמשך
HLZ-24	Elusa	Bar-Oz, Gini and Weissbrod	Daniel Fuks, Yael Slasky		A1	1	1/10a	64	2015-02-01	Wet Sieve Picking		10	גלל		גלל				1	1			כן
HLZ-25	Elusa	Bar-Oz, Gini and Weissbrod	Daniel Fuks, Yael Slasky	2016-2018	A1	1	1/10b	57	2015-02-01	Wet Sieve Picking		1	זית	Olea europaea	גלעין	pit	זיתיים	Oleaceae	1	1			כן
HLZ-26	Elusa	Bar-Oz, Gini and Weissbrod	Daniel Fuks, Yael Slasky	2016-2018	A1	1	1/10c	66	2015-02-01	Wet Sieve Picking		1	תמר	Phoenix dactylifera	גלעין	seed	דקליים	Palmae	1	1			כן		הופרד למסירה לגיל זאבי
HLZ-26	Elusa	Bar-Oz, Gini and Weissbrod	Daniel Fuks, Yael Slasky	2016-2018	A1	1	1/10c	66	2015-02-01	Wet Sieve Picking		2	דגני?		קנה שורש				1	1			כן				שווה הגדרה על בסיס איסופים. 100% דגניא או גומאי, 95% דגני
HLZ-27	Elusa	Bar-Oz, Gini and Weissbrod	Daniel Fuks, Yael Slasky	2016-2018	A4	4	4/05b	46	2015-02-01	Wet Sieve Picking		1	חרוב מצוי	Ceratonia siliqua	זרע	seed	כליליים	Caesalpiniaceae	2	2			כן				אחד בטוח, אחד בעייתי בגלל שינוי צורה
HLZ-27	Elusa	Bar-Oz, Gini and Weissbrod	Daniel Fuks, Yael Slasky	2016-2018	A4	4	4/05b	46	2015-02-01	Wet Sieve Picking		2	תמר	Phoenix dactylifera	גלעין	seed	דקליים	Palmae	6	6			כן		הופרד למסירה לגיל זאבי	4שלמים 4חצאים
HLZ-27	Elusa	Bar-Oz, Gini and Weissbrod	Daniel Fuks, Yael Slasky	2016-2018	A4	4	4/05b	46	2015-02-01	Wet Sieve Picking		3	זית	Olea europaea	גלעין	pit	זיתיים	Oleaceae	2	2			כן		אחד חצי
HLZ-27	Elusa	Bar-Oz, Gini and Weissbrod	Daniel Fuks, Yael Slasky	2016-2018	A4	4	4/05b	46	2015-02-01	Wet Sieve Picking		4	דגני		פרקים				4	4			כן
HLZ-27	Elusa	Bar-Oz, Gini and Weissbrod	Daniel Fuks, Yael Slasky	2016-2018	A4	4	4/05b	46	2015-02-01	Wet Sieve Picking		5	גלל		גלל				1	1			כן
HLZ-28	Elusa	Bar-Oz, Gini and Weissbrod	Daniel Fuks, Yael Slasky	2016-2018	A4	4	4/05c	47	2015-02-01	Wet Sieve Picking		1	תמר	Phoenix dactylifera	גלעין	seed	דקליים	Palmae	2	2			כן		הופרד למסירה לגיל זאבי	1שלם 2חצאים, לדעתי MNI=3
HLZ-28	Elusa	Bar-Oz, Gini and Weissbrod	Daniel Fuks, Yael Slasky	2016-2018	A4	4	4/05c	47	2015-02-01	Wet Sieve Picking		2	זית	Olea europaea	גלעין	pit	זיתיים	Oleaceae	1	1			כן		חצי
HLZ-29	Elusa	Bar-Oz, Gini and Weissbrod	Daniel Fuks, Yael Slasky	2016-2018	A4	4	4/05d	48	2015-02-01	Wet Sieve Picking		1	תמר	Phoenix dactylifera	גלעין	seed	דקליים	Palmae	4	4			כן		הופרד למסירה לגיל זאבי
HLZ-29	Elusa	Bar-Oz, Gini and Weissbrod	Daniel Fuks, Yael Slasky	2016-2018	A4	4	4/05d	48	2015-02-01	Wet Sieve Picking		2	זית	Olea europaea	גלעין	pit	זיתיים	Oleaceae	3	3			כן
HLZ-3	Elusa	Bar-Oz, Gini and Weissbrod	Daniel Fuks, Yael Slasky	2015	A1	1	1/02a	12	2015-02-01	Bucket Floated	8	1	שעורה	Hordeum	גרגיר	grain	דגניים	Gramineae	3	3		כן	כן		במבחנה עוד שני שברים, לפחות אחד מצטרף יפה לשעורה
HLZ-3	Elusa	Bar-Oz, Gini and Weissbrod	Daniel Fuks, Yael Slasky	2015	A1	1	1/02a	12	2015-02-01	Bucket Floated	8	2	גפן	Vitis vinifera	חרצן	pip	גפניים	Vitaceae	2	2		כן	כן
HLZ-3	Elusa	Bar-Oz, Gini and Weissbrod	Daniel Fuks, Yael Slasky	2015	A1	1	1/02a	12	2015-02-01	Bucket Floated	8	3	בקיים	Vicieae	זרע	seed	פרפרניים	Fabaceae	1	1		לא	כן		בהתחלה הייתה חשש לחמצה למרות שזה מאד קטן ביום 16.5.16 יעל קבעה שזה נראה כרשינה על בסיס השוואה לכרשינה משבטה		קשה לזהות כי אין עובר או דגם ברור. אולי טופח או בקיה.
HLZ-3	Elusa	Bar-Oz, Gini and Weissbrod	Daniel Fuks, Yael Slasky	2015	A1	1	1/02a	12	2015-02-01	Bucket Floated	8	4	עדשה תרבותית	Lens culinaris	זרע	seed	פרפרניים	Fabaceae	2	2			כן		באישור יעל
HLZ-3	Elusa	Bar-Oz, Gini and Weissbrod	Daniel Fuks, Yael Slasky	2015	A1	1	1/02a	12	2015-02-01	Bucket Floated	8	5	בלתי מזוהה		זרע	seed			2	2		לא	כן		אחד קשה לזיהוי כי דבוק אליו משהו		לא להתעסק בשלב זה
HLZ-3	Elusa	Bar-Oz, Gini and Weissbrod	Daniel Fuks, Yael Slasky	2015	A1	1	1/02a	12	2015-02-01	Bucket Floated	8	6	שעורה	Hordeum	פרק ציר שיבולת	rachis fragment	דגניים	Gramineae	8	8		כן	כן		זיהוי של אודי
HLZ-3	Elusa	Bar-Oz, Gini and Weissbrod	Daniel Fuks, Yael Slasky	2015	A1	1	1/02a	12	2015-02-01	Bucket Floated	8	7	בלתי מזוהה		שונות				3	3			כן		שלשה חלקים לזיהוי או להחזרה		לבדוק אם החלק השטוח של הפריט המשולש מצטרף לאמיך
HLZ-3	Elusa	Bar-Oz, Gini and Weissbrod	Daniel Fuks, Yael Slasky	2015	A1	1	1/02a	12	2015-02-01	Bucket Floated	8	8	חרק		גולם של פרפר?								כן
HLZ-3	Elusa	Bar-Oz, Gini and Weissbrod	Daniel Fuks, Yael Slasky	2015	A1	1	1/02a	12	2015-02-01	Bucket Floated	8	9	דגני		גרגר	grain	דגניים	Gramineae	5	5			כן		שני גרגרים דומים בצורה אך שונים בגודל
HLZ-3	Elusa	Bar-Oz, Gini and Weissbrod	Daniel Fuks, Yael Slasky	2015	A1	1	1/02a	12	2015-02-01	Bucket Floated	8	10	פיקוס התאנה	Ficus carica	אגוזית	nutlet	תותיים	Moraceae	2	2		לא הכל	כן
HLZ-3	Elusa	Bar-Oz, Gini and Weissbrod	Daniel Fuks, Yael Slasky	2015	A1	1	1/02a	12	2015-02-01	Bucket Floated	8	11	דגני		גרגר	grain	דגניים	Gramineae	2	2			כן
HLZ-3	Elusa	Bar-Oz, Gini and Weissbrod	Daniel Fuks, Yael Slasky	2015	A1	1	1/02a	12	2015-02-01	Bucket Floated	8	12	דגני		גרגר	grain	דגניים	Gramineae	2	2			כן		שונים בצורה מהקודם, השלישי קצת קשה לזיהוי
HLZ-3	Elusa	Bar-Oz, Gini and Weissbrod	Daniel Fuks, Yael Slasky	2015	A1	1	1/02a	12	2015-02-01	Bucket Floated	8	13	דגני		שברי גרגיר	grain fragments	דגניים	Gramineae					כן		שרופים מדיי לזיהוי, כנראה
HLZ-3	Elusa	Bar-Oz, Gini and Weissbrod	Daniel Fuks, Yael Slasky	2015	A1	1	1/02a	12	2015-02-01	Bucket Floated	8	14	מתנן שעיר	Thymelaea hirsuta	פרי				2	2		כן	כן
HLZ-3	Elusa	Bar-Oz, Gini and Weissbrod	Daniel Fuks, Yael Slasky	2015	A1	1	1/02a	12	2015-02-01	Bucket Floated	8	15	חרק		חרק				1	1			לא, כנראה
HLZ-3	Elusa	Bar-Oz, Gini and Weissbrod	Daniel Fuks, Yael Slasky	2015	A1	1	1/02a	12	2015-02-01	Bucket Floated	8	16	דגני		מלען	spikelet	דגניים	Gramineae	1	1			כן
HLZ-3	Elusa	Bar-Oz, Gini and Weissbrod	Daniel Fuks, Yael Slasky	2015	A1	1	1/02a	12	2015-02-01	Bucket Floated	8	17	בלתי מזוהה		זרע	seed			1	1			כן				לא להתעסק בשלב זה
HLZ-3	Elusa	Bar-Oz, Gini and Weissbrod	Daniel Fuks, Yael Slasky	2015	A1	1	1/02a	12	2015-02-01	Bucket Floated	8	18	חיעד ספרדי	Aizoon hispanicum	זרע	seed	חיעדיים	Aizoaceae	7	7		כן	כן		ארבע שברירים, מתוכם שלושה נספרו כי להם יש קצה
HLZ-3	Elusa	Bar-Oz, Gini and Weissbrod	Daniel Fuks, Yael Slasky	2015	A1	1	1/02a	12	2015-02-01	Bucket Floated	8	19	אהל מצוי	Mesembryanthemum nodiflorum	זרע	seed	חיעדיים	Aizoaceae	175	175		לרוב	לא		חלק שבורים, אך את רוב השבורים נשארו בעפר. 65 מעל 0.5 מ"מ ו-110 מתחת 0.5 מ"מ ועוד תריסר (12 או 13) מבין השברים/שדופים שלא נספרו.
HLZ-3	Elusa	Bar-Oz, Gini and Weissbrod	Daniel Fuks, Yael Slasky	2015	A1	1	1/02a	12	2015-02-01	Bucket Floated	8	20	בלתי מזוהה		חתיכת גבעול				1	1		לא	כן		השוו ל1-26 לעיל
HLZ-3	Elusa	Bar-Oz, Gini and Weissbrod	Daniel Fuks, Yael Slasky	2015	A1	1	1/02a	12	2015-02-01	Bucket Floated	8	21	דגני?		זרע?				3	3			כן		אחד עם זחל.
HLZ-3	Elusa	Bar-Oz, Gini and Weissbrod	Daniel Fuks, Yael Slasky	2015	A1	1	1/02a	12	2015-02-15	Bucket Floated	8	22	דגני?		זרע?				6	6					דברים שונים דמויי דגן				Group
HLZ-3	Elusa	Bar-Oz, Gini and Weissbrod	Daniel Fuks, Yael Slasky	2015	A1	1	1/02a	12	2015-02-15	Bucket Floated	8	23	דגני		פרק ציר שיבולת	rachis fragment	דגניים	Gramineae	15	15					אחד מאד קטן עם שערות				1	דגנים
HLZ-3	Elusa	Bar-Oz, Gini and Weissbrod	Daniel Fuks, Yael Slasky	2015	A1	1	1/02a	12	2015-02-01	Bucket Floated	8	24	בלתי מזוהה		זרע?				7	7			אחד כנראה	רצנטי??	חיעד? אהל? או משהו אחר?				2	קטניות
HLZ-3	Elusa	Bar-Oz, Gini and Weissbrod	Daniel Fuks, Yael Slasky	2015	A1	1	1/02a	12	2015-02-01	Bucket Floated	8	25	בלתי מזוהה		מלענים?		דגניים	Gramineae	35	35			אחד לא		השוו ל3-16 לעיל ול1-27. ארבעה כאן ללא שיניים משמעותיים-				3	פירות
HLZ-3	Elusa	Bar-Oz, Gini and Weissbrod	Daniel Fuks, Yael Slasky	2015	A1	1	1/02a	12	2015-02-01	Bucket Floated	8	26	חרק		חלקי חרק רצנטיים?				0	עשרות				רצנטי??					4	צמחי תועלת אחרים
HLZ-3	Elusa	Bar-Oz, Gini and Weissbrod	Daniel Fuks, Yael Slasky	2015	A1	1	1/02a	12	2015-02-01	Bucket Floated	8	27	בלתי מזוהה		קוצים רצנטיים?				4	4				רצנטי??					5	עשבים רעים
HLZ-3	Elusa	Bar-Oz, Gini and Weissbrod	Daniel Fuks, Yael Slasky	2015	A1	1	1/02a	12	2015-02-01	Bucket Floated	8	28	בלתי מזוהה		עלה				2	2				השוו ל1-29 לעיל					6	צמחי בר
HLZ-3	Elusa	Bar-Oz, Gini and Weissbrod	Daniel Fuks, Yael Slasky	2015	A1	1	1/02a	12	2015-02-01	Bucket Floated	8	29	אשל הפרקים	Tamarix aphylla	פרקי עלים	leaf segments			14	14				חמישה ללא צ'ופצ'יק					7	בלתי
HLZ-3	Elusa	Bar-Oz, Gini and Weissbrod	Daniel Fuks, Yael Slasky	2015	A1	1	1/02a	12	2015-02-01	Bucket Floated	8	30	מתנן שעיר	Thymelaea hirsuta	עלים				8	7+1		לא	אחד לא	אחד לא מפוחם ובכלל לא ברור שהוא מתנן. השאר נראים לי מתנן ע"פ צור וקשקשים					8	פחם עצם פסולת קונכיות ו- ?
HLZ-3	Elusa	Bar-Oz, Gini and Weissbrod	Daniel Fuks, Yael Slasky	2015	A1	1	1/02a	12	2015-02-01	Bucket Floated	8	31	בלתי מזוהה		מעורב										אין כאן דברים מובהקים רבים, אניח את זה בינתיים
HLZ-3	Elusa	Bar-Oz, Gini and Weissbrod	Daniel Fuks, Yael Slasky	2015	A1	1	1/02a	12	2015-02-01	Bucket Floated	8	32	פיקוס התאנה	Ficus carica	אגוזית שלמה	nutlet	תותיים	Moraceae	10	10
HLZ-3	Elusa	Bar-Oz, Gini and Weissbrod	Daniel Fuks, Yael Slasky	2015	A1	1	1/02a	12	2015-02-01	Bucket Floated	8	33	פיקוס התאנה	Ficus carica cf. sycomorus	שבר אגוזית	nutlet	תותיים	Moraceae	11	11		לא			לבדוק שניים שהם דקים יותר
HLZ-3	Elusa	Bar-Oz, Gini and Weissbrod	Daniel Fuks, Yael Slasky	2015	A1	1	1/02a	12	2015-02-15	Bucket Floated	8	34	אהל מצוי	Mesembryanthemum nodiflorum	זרע	seed	חיעדיים	Aizoaceae	9	9 בערך			כן		מחוברים ב 3 חלקים	??אהל מצוי
HLZ-3	Elusa	Bar-Oz, Gini and Weissbrod	Daniel Fuks, Yael Slasky	2015	A1	1	1/02a	12	2015-02-15	Bucket Floated	8	35	גזר/גזיר	Daucus/Torilis	זרע	seed	סוככיים		3	3				רצנטי??	אולי גזיר המפרקים?		נראה רצנטי, לא בטוח. גזר/גזיר
HLZ-3	Elusa	Bar-Oz, Gini and Weissbrod	Daniel Fuks, Yael Slasky	2015	A1	1	1/02a	12	2015-02-01	Bucket Floated	8	36	בלתי מזוהה		זרע	seed			14	14					מעורב ליואל		לא להתעסק בשלב זה
HLZ-3	Elusa	Bar-Oz, Gini and Weissbrod	Daniel Fuks, Yael Slasky	2015	A1	1	1/02a	12	2015-02-01	Bucket Floated	8	37	בלתי מזוהה		פרק ציר שיבולת	rachis fragment	דגניים	Gramineae	9	9										לא כל כך בר הגדרה. שונות
HLZ-3	Elusa	Bar-Oz, Gini and Weissbrod	Daniel Fuks, Yael Slasky	2015	A1	1	1/02a	12	2015-02-01	Bucket Floated	8	38	בלתי מזוהה				מורכבים?	Asteraceae?	1	1					מעורב
HLZ-3	Elusa	Bar-Oz, Gini and Weissbrod	Daniel Fuks, Yael Slasky	2015	A1	1	1/02a	12	2015-02-01	Bucket Floated	8	39	בלתי מזוהה												לא להתעסק
HLZ-3	Elusa	Bar-Oz, Gini and Weissbrod	Daniel Fuks, Yael Slasky	2015	A1	1	1/02a	12	2015-02-01	Bucket Floated	8	40	דגני		פרק ציר שיבולת	rachis fragment	דגניים	Gramineae	1	1
HLZ-3	Elusa	Bar-Oz, Gini and Weissbrod	Daniel Fuks, Yael Slasky	2015	A1	1	1/02a	12	2015-02-01	Bucket Floated	8	41	כתרון	Coronilla sp.	תרמיל	pod	פרפרניים	Papilionaceae	1	1					Securigera parviflora		כתרון
HLZ-3	Elusa	Bar-Oz, Gini and Weissbrod	Daniel Fuks, Yael Slasky	2015	A1	1	1/02a	12	2015-02-01	Bucket Floated	8	42	שעורה	Hordeum	פרק ציר שיבולת	rachis fragment and basal rachis/collar	דגניים	Gramineae	2	2					זיהוי של אודי- יש כאן 2 טיפוסים					כנראה 6-טורית. עם בסיס
HLZ-3	Elusa	Bar-Oz, Gini and Weissbrod	Daniel Fuks, Yael Slasky	2015	A1	1	1/02a	12	2015-02-01	Bucket Floated	8	43	גפן	Vitis vinifera	חרצן	pip	גפניים	Vitaceae	1	1					זיהוי של אודי	עוקץ
HLZ-3	Elusa	Bar-Oz, Gini and Weissbrod	Daniel Fuks, Yael Slasky	2015	A1	1	1/02a	12	2015-02-01	Bucket Floated	8	44	דגני		גרגיר	grain	דגניים	Gramineae	1	1					אולי שעורה ואולי דגן אחר, מיעל
HLZ-3	Elusa	Bar-Oz, Gini and Weissbrod	Daniel Fuks, Yael Slasky	2015	A1	1	1/02a	12	2015-02-01	Bucket Floated	8	45				culm nodes			4	4	2mm
HLZ-30	Elusa	Bar-Oz, Gini and Weissbrod	Daniel Fuks	2016-2018	A4	4	4/06a	60	2015-02-01	Wet Sieve Picking	120	1	שעורה	Hordeum	גרגיר	grain	דגניים	Gramineae	492	492			כן		בקופסית	ייתכנו טיפוסים שונים
HLZ-30	Elusa	Bar-Oz, Gini and Weissbrod	Daniel Fuks	2016-2018	A4	4	4/06a	60	2015-02-01	Wet Sieve Picking		2	חיטה	Triticum	גרגיר	grain	דגניים	Gramineae	42	42			כן
HLZ-30	Elusa	Bar-Oz, Gini and Weissbrod	Daniel Fuks	2016-2018	A4	4	4/06a	60	2015-02-01	Wet Sieve Picking		3	חיטה/שעורה	Hordeum cf. Triticum	גרגיר	grain	דגניים	Gramineae	42	42			כן
HLZ-30	Elusa	Bar-Oz, Gini and Weissbrod	Daniel Fuks	2016-2018	A4	4	4/06a	60	2015-02-01	Wet Sieve Picking		4	זון?		גרגיר	grain	דגניים	Gramineae	1	1			כן
HLZ-30	Elusa	Bar-Oz, Gini and Weissbrod	Daniel Fuks	2016-2018	A4	4	4/06a	60	2015-02-01	Wet Sieve Picking		5	EMPTY
HLZ-30	Elusa	Bar-Oz, Gini and Weissbrod	Daniel Fuks	2016-2018	A4	4	4/06a	60	2015-02-15	Wet Sieve Picking		6	דגני		שברי גרגיר								כן
HLZ-30	Elusa	Bar-Oz, Gini and Weissbrod	Daniel Fuks	2016-2018	A4	4	4/06a	60	2015-02-15	Wet Sieve Picking		7	דגני		גרגיר				4	4			כן		כל אחד מין אחר
HLZ-30	Elusa	Bar-Oz, Gini and Weissbrod	Daniel Fuks	2016-2018	A4	4	4/06a	60	2015-02-01	Wet Sieve Picking		8	דגני		פרקים				14	14			כן
HLZ-30	Elusa	Bar-Oz, Gini and Weissbrod	Daniel Fuks	2016-2018	A4	4	4/06a	60	2015-02-01	Wet Sieve Picking		9	שעורה	Hordeum	פרק ציר שיבולת	rachis fragment	דגניים	Gramineae	1	1			כן
HLZ-30	Elusa	Bar-Oz, Gini and Weissbrod	Daniel Fuks	2016-2018	A4	4	4/06a	60	2015-02-01	Wet Sieve Picking		10	גפן	Vitis vinifera	חרצן	pip	גפניים	Vitaceae	82	82			כן
HLZ-30	Elusa	Bar-Oz, Gini and Weissbrod	Daniel Fuks	2016-2018	A4	4	4/06a	60	2015-02-01	Wet Sieve Picking		11	גפן	Vitis vinifera	עוקצים	pedicel	גפניים	Vitaceae	5	5			כן
HLZ-30	Elusa	Bar-Oz, Gini and Weissbrod	Daniel Fuks	2016-2018	A4	4	4/06a	60	2015-02-01	Wet Sieve Picking		12	מתנן שעיר	Thymelaea hirsuta	אגוזית				9	9			כן
HLZ-30	Elusa	Bar-Oz, Gini and Weissbrod	Daniel Fuks	2016-2018	A4	4	4/06a	60	2015-02-01	Wet Sieve Picking		13	דבקה	Galium	פרודה		פואתיים	Rubiaceae	3	3			כן		להגדיר בהזדמנות
HLZ-30	Elusa	Bar-Oz, Gini and Weissbrod	Daniel Fuks	2016-2018	A4	4	4/06a	60	2015-02-01	Wet Sieve Picking		14	זנב עקרב?						1	1			כן				לחפש בשושניים- אבל לא פשוט- לחכות
HLZ-30	Elusa	Bar-Oz, Gini and Weissbrod	Daniel Fuks	2016-2018	A4	4	4/06a	60	2015-02-01	Wet Sieve Picking		15	בלתי מזוהה		בסיס אגוזית?				1	1			כן				בסיס אגוזית של אלה?
HLZ-30	Elusa	Bar-Oz, Gini and Weissbrod	Daniel Fuks	2016-2018	A4	4	4/06a	60	2015-02-01	Wet Sieve Picking		16	בלתי מזוהה		ניצנים? עלים				1	1			כן
HLZ-30	Elusa	Bar-Oz, Gini and Weissbrod	Daniel Fuks	2016-2018	A4	4	4/06a	60	2015-02-01	Wet Sieve Picking		17	בלתי מזוהה						1	1			כן		בר זיהוי
HLZ-30	Elusa	Bar-Oz, Gini and Weissbrod	Daniel Fuks	2016-2018	A4	4	4/06a	60	2015-02-01	Wet Sieve Picking		18	שיטת היאור	Acacia nilotica	זרע				1	1	לפי בליטה בעדשה, פס סגור וגודל משןער		כן		מתחבר לאחרים כמוהו לעיל
HLZ-30	Elusa	Bar-Oz, Gini and Weissbrod	Daniel Fuks	2016-2018	A4	4	4/06a	60	2015-02-01	Wet Sieve Picking		19	רימון מצוי	Punica granatum					2	2			כן
HLZ-30	Elusa	Bar-Oz, Gini and Weissbrod	Daniel Fuks	2016-2018	A4	4	4/06a	60	2015-02-01	Wet Sieve Picking		20	בלתי מזוהה						2	2			אחד עם אנדוספרם לא מפוחם		אולי להערות ליואל
HLZ-30	Elusa	Bar-Oz, Gini and Weissbrod	Daniel Fuks	2016-2018	A4	4	4/06a	60	2015-02-01	Wet Sieve Picking		21	זית	Olea europaea	שבר גלעין	pit fragment	זיתיים	Oleaceae	1	1			כן		3 שברים
HLZ-30	Elusa	Bar-Oz, Gini and Weissbrod	Daniel Fuks	2016-2018	A4	4	4/06a	60	2015-02-01	Wet Sieve Picking		22	פיקוס התאנה	Ficus carica	זרעים בציפה								כן		חתיכות ציפה
HLZ-30	Elusa	Bar-Oz, Gini and Weissbrod	Daniel Fuks	2016-2018	A4	4	4/06a	60	2015-02-01	Wet Sieve Picking		23	דגני		שורש?				1	1			כן
HLZ-30	Elusa	Bar-Oz, Gini and Weissbrod	Daniel Fuks	2016-2018	A4	4	4/06a	60	2015-02-01	Wet Sieve Picking		24	בלתי מזוהה						0	מאות			כן		הרוב עץ	בקופסית
HLZ-30	Elusa	Bar-Oz, Gini and Weissbrod	Daniel Fuks	2016-2018	A4	4	4/06a	60	2015-02-01	Wet Sieve Picking		25	עדשה תרבותית	Lens culinaris	זרע	seed	פרפרניים	Fabaceae	24	24			כן		באישור יעל	23חלקים, 2בחתיכות
HLZ-30	Elusa	Bar-Oz, Gini and Weissbrod	Daniel Fuks	2016-2018	A4	4	4/06a	60	2015-02-01	Wet Sieve Picking		26	בקיית הכרשינה	Vicia ervilia	זרע	seed	פרפרניים	Fabaceae	4	4			כן		עוד שניים פוטנציאליים ב30-27
HLZ-30	Elusa	Bar-Oz, Gini and Weissbrod	Daniel Fuks	2016-2018	A4	4	4/06a	60	2015-02-01	Wet Sieve Picking		27	בקיים	Vicieae	זרע	seed	פרפרניים	Fabaceae	9	9			כן		רק אם מתחברים למשהו
HLZ-30	Elusa	Bar-Oz, Gini and Weissbrod	Daniel Fuks	2016-2018	A4	4	4/06a	60	2015-02-01	Wet Sieve Picking		28	בקיים	Vicieae	זרע	seed	פרפרניים	Fabaceae	3	3			כן		קטנית קטנה ועגולה		בקיים וזהו בינתיים
HLZ-30	Elusa	Bar-Oz, Gini and Weissbrod	Daniel Fuks	2016-2018	A4	4	4/06a	60	2015-02-01	Wet Sieve Picking		29	בלתי מזוהה		ענבה								כן		השווה ל-23-11	להגדרה	מעניין
HLZ-30	Elusa	Bar-Oz, Gini and Weissbrod	Daniel Fuks	2016-2018	A4	4	4/06a	60	2015-02-01	Wet Sieve Picking		30	בלתי מזוהה	unidentified	זרע	seed			1	1			כן		יעל: קליפה דומה לגפן
HLZ-30	Elusa	Bar-Oz, Gini and Weissbrod	Daniel Fuks	2016-2018	A4	4	4/06a	60	2015-02-01	Wet Sieve Picking		31	בקיים		זרע	seed	פרפרניים	Fabaceae	2	2			כן		קטנית בינונית ועגולה		אין במה להיתפס. לחבר בהמשך
HLZ-30	Elusa	Bar-Oz, Gini and Weissbrod	Daniel Fuks	2016-2018	A4	4	4/06a	60	2015-02-01	Wet Sieve Picking		32	קטנית		זרע	seed	פרפרניים	Fabaceae	2	2			כן		יעל: פול קטן?		אולי פול אך לא ברות זיהוי כרגע
HLZ-31	Elusa	Bar-Oz, Gini and Weissbrod	Daniel Fuks	2016-2018	A4	4	4/07a	69	2015-02-01	Wet Sieve Picking	100	1	שעורה	Hordeum	גרגיר	grain	דגניים	Gramineae	200	200			כן		בקופסית
HLZ-31	Elusa	Bar-Oz, Gini and Weissbrod	Daniel Fuks	2016-2018	A4	4	4/07a	69	2015-02-01	Wet Sieve Picking		2	חיטה	Triticum	גרגיר	grain	דגניים	Gramineae	18	18			כן
HLZ-31	Elusa	Bar-Oz, Gini and Weissbrod	Daniel Fuks	2016-2018	A4	4	4/07a	69	2015-02-01	Wet Sieve Picking		3	חיטה/שעורה	Hordeum cf. Triticum	גרגיר	grain	דגניים	Gramineae	19	19			כן
HLZ-31	Elusa	Bar-Oz, Gini and Weissbrod	Daniel Fuks	2016-2018	A4	4	4/07a	69	2015-02-01	Wet Sieve Picking		4	דגני		שברי גרגיר								כן
HLZ-31	Elusa	Bar-Oz, Gini and Weissbrod	Daniel Fuks	2016-2018	A4	4	4/07a	69	2015-02-01	Wet Sieve Picking		5	גפן	Vitis vinifera	חרצן	pip	גפניים	Vitaceae	28	28			כן		אחד בשברים
HLZ-31	Elusa	Bar-Oz, Gini and Weissbrod	Daniel Fuks	2016-2018	A4	4	4/07a	69	2015-02-01	Wet Sieve Picking		6	גפן	Vitis vinifera	עוקץ	pedicel	גפניים	Vitaceae	3	3			כן
HLZ-31	Elusa	Bar-Oz, Gini and Weissbrod	Daniel Fuks	2016-2018	A4	4	4/07a	69	2015-02-01	Wet Sieve Picking		7	תמר	Phoenix dactylifera	שבר גלעין	seed	דקליים	Palmae	1	1			כן		במבחנה
HLZ-31	Elusa	Bar-Oz, Gini and Weissbrod	Daniel Fuks	2016-2018	A4	4	4/07a	69	2015-02-01	Wet Sieve Picking		8	זית	Olea europaea	גלעין	pit	זיתיים	Oleaceae	3	3			כן		אחד חצי
HLZ-31	Elusa	Bar-Oz, Gini and Weissbrod	Daniel Fuks	2016-2018	A4	4	4/07a	69	2015-02-01	Wet Sieve Picking		9	דגני		פרקים				5	5			כן
HLZ-31	Elusa	Bar-Oz, Gini and Weissbrod	Daniel Fuks	2016-2018	A4	4	4/07a	69	2015-02-01	Wet Sieve Picking		10	מתנן שעיר	Thymelaea hirsuta	אגוזית				3	3			כנראה		אחד משונה אולי כי עטוי
HLZ-31	Elusa	Bar-Oz, Gini and Weissbrod	Daniel Fuks	2016-2018	A4	4	4/07a	69	2015-02-01	Wet Sieve Picking		11	בלתי מזוהה		ניצן?				1	1			כן		השווה לעיל
HLZ-31	Elusa	Bar-Oz, Gini and Weissbrod	Daniel Fuks	2016-2018	A4	4	4/07a	69	2015-02-01	Wet Sieve Picking		12	בלתי מזוהה		מעורב								כן		לא להתעסק
HLZ-31	Elusa	Bar-Oz, Gini and Weissbrod	Daniel Fuks	2016-2018	A4	4	4/07a	69	2015-02-15	Wet Sieve Picking		13	גלל		גלל								כן		4 שברים
HLZ-31	Elusa	Bar-Oz, Gini and Weissbrod	Daniel Fuks	2016-2018	A4	4	4/07a	69	2015-02-15	Wet Sieve Picking		14	טופח	Lathyrus sect. cicercula	זרע	seed	פרפרניים	Fabaceae	1	1			כן				זרע קיצוני
HLZ-31	Elusa	Bar-Oz, Gini and Weissbrod	Daniel Fuks	2016-2018	A4	4	4/07a	69	2015-02-01	Wet Sieve Picking		15	בלתי מזוהה		זרע?				1	1	חרוב?		כן				חרוב? לבדוק קליפה
HLZ-31	Elusa	Bar-Oz, Gini and Weissbrod	Daniel Fuks	2016-2018	A4	4	4/07a	69	2015-02-01	Wet Sieve Picking		16	cf. חרוב מצויב	cf. Ceratonia siliqua	זרע	seed	כליליים cf.	cf. Caesalpiniaceae	1	1			כן				2 פסיגים. אולי חרוב?
HLZ-31	Elusa	Bar-Oz, Gini and Weissbrod	Daniel Fuks	2016-2018	A4	4	4/07a	69	2015-02-01	Wet Sieve Picking		17	דבקה	Galium	פרודה		פואתיים	Rubiaceae	1	1			כן
HLZ-31	Elusa	Bar-Oz, Gini and Weissbrod	Daniel Fuks	2016-2018	A4	4	4/07a	69	2015-02-01	Wet Sieve Picking		18	בקיית הכרשינה	Vicia ervilia	זרע	seed	פרפרניים	Fabaceae	6	6			כן
HLZ-31	Elusa	Bar-Oz, Gini and Weissbrod	Daniel Fuks	2016-2018	A4	4	4/07a	69	2015-02-01	Wet Sieve Picking		19	עדשה תרבותית	Lens culinaris	זרע	seed	פרפרניים	Fabaceae	10	10			כן		באישור יעל
HLZ-31	Elusa	Bar-Oz, Gini and Weissbrod	Daniel Fuks	2016-2018	A4	4	4/07a	69	2015-02-01	Wet Sieve Picking		20	קטנית עגולה		זרע	seed	פרפרניים	Fabaceae	2	2			כן		יעל ויואל: לחבר בהמשך
HLZ-31	Elusa	Bar-Oz, Gini and Weissbrod	Daniel Fuks	2016-2018	A4	4	4/07a	69	2015-02-01	Wet Sieve Picking		21	קטנית		זרע	seed	פרפרניים	Fabaceae	3	3			כן
HLZ-31	Elusa	Bar-Oz, Gini and Weissbrod	Daniel Fuks	2016-2018	A4	4	4/07a	69	2015-02-01	Wet Sieve Picking		22	קטנית		זרע	seed	פרפרניים	Fabaceae	3	3			כן				השקוע אולי יציל את האחרים, כיוון של פול, אבל אין מספיק בשביל להגדיר
HLZ-31	Elusa	Bar-Oz, Gini and Weissbrod	Daniel Fuks	2016-2018	A4	4	4/07a	69	2015-02-01	Wet Sieve Picking		23	בקיים		זרע	seed	פרפרניים	Fabaceae	1	1			כן		צימצמתי לטופח נאה בעזרת המגדיר אך יואל לא אישר		עדשה לא נראית, אולי זרע ירוק שהתפחם...
HLZ-31	Elusa	Bar-Oz, Gini and Weissbrod	Daniel Fuks	2016-2018	A4	4	4/07a	69	2015-02-01	Wet Sieve Picking		24	שעורה	Hordeum sp.	זרע	seed	דגניים	Gramineae	1	1			כן
HLZ-31	Elusa	Bar-Oz, Gini and Weissbrod	Daniel Fuks	2016-2018	A4	4	4/07a	69	2015-02-15	Wet Sieve Picking		25	זון?	Lolium?	זרע	seed	דגניים	Gramineae	1	1			כן		עברתי על הזונים באוסף, מזכיר זון משכר וזון פרסי אך לא לגמרי
HLZ-32	Elusa	Bar-Oz, Gini and Weissbrod	Daniel Fuks	2016-2018	A4	4	4/07b	70	2015-02-15	Wet Sieve Picking		1	אפרסק	Prunus persica	גלעין	stone	ורדיים	Rosaceae	1	1			כן		לבדוק, להשוות לזה של שבטה	בקופסית
HLZ-32	Elusa	Bar-Oz, Gini and Weissbrod	Daniel Fuks	2016-2018	A4	4	4/07b	70	2015-02-01	Wet Sieve Picking		2	תמר	Phoenix dactylifera	גלעין	seed	דקליים	Palmae	3	3			כן		הופרד למסירה לגיל זאבי	אחד שלם ו-3חצאים
HLZ-32	Elusa	Bar-Oz, Gini and Weissbrod	Daniel Fuks	2016-2018	A4	4	4/07b	70	2015-02-01	Wet Sieve Picking		3	זית	Olea europaea	גלעין	pit	זיתיים	Oleaceae	1	1			כן
HLZ-33	Elusa	Bar-Oz, Gini and Weissbrod	Daniel Fuks	2016-2018			column in east section-for dating samples	10	2015-02-01			1	זית	Olea europaea	גלעין	pit	זיתיים	Oleaceae	1	1			כן		שברים
HLZ-34	Elusa	Bar-Oz, Gini and Weissbrod	Daniel Fuks	2016-2018	B		6/02a	78	2015-02-01	Coarse sieve		1	שעורה	Hordeum	גרגיר	grain	דגניים	Gramineae	1	1			כן
HLZ-35	Elusa	Bar-Oz, Gini and Weissbrod	Daniel Fuks	2016-2018	B		6/02b	79	2015-02-01	Coarse sieve		1	גלל		גלל?				1	1			לא
HLZ-36	Elusa	Bar-Oz, Gini and Weissbrod	Daniel Fuks	2016-2018	B		7/01b	83	2015-02-01	Coarse sieve		1	תמר	Phoenix dactylifera	גלעין	seed	דקליים	Palmae	2	2			כן		הופרד למסירה לגיל זאבי
HLZ-37	Elusa	Bar-Oz, Gini and Weissbrod	Daniel Fuks	2016-2018	B		7/01d	85	2015-02-01	Coarse sieve		1	זית	Olea europaea	גלעין	pit	זיתיים	Oleaceae	9	9			כן		בקופסית	ספירה של MNI, 6שלמים
HLZ-38	Elusa	Bar-Oz, Gini and Weissbrod	Daniel Fuks	2016-2018	B		7/02d	87	2015-02-01	Wet Sieve/Coarse sift		1	תמר	Phoenix dactylifera	גלעין	seed	דקליים	Palmae	4	4			כן		הופרד למסירה לגיל זאבי	2שלמים ו-4חצאים
HLZ-38	Elusa	Bar-Oz, Gini and Weissbrod	Daniel Fuks	2016-2018	B		7/02d	87	2015-02-01	Wet Sieve/Coarse sift		2	שעורה	Hordeum	גרגיר	grain	דגניים	Gramineae	36	36			כן
HLZ-38	Elusa	Bar-Oz, Gini and Weissbrod	Daniel Fuks	2016-2018	B		7/02d	87	2015-02-01	Wet Sieve/Coarse sift		3	חיטה	Triticum	גרגיר	grain	דגניים	Gramineae	2	2			כן
HLZ-38	Elusa	Bar-Oz, Gini and Weissbrod	Daniel Fuks	2016-2018	B		7/02d	87	2015-02-01	Wet Sieve/Coarse sift		4	חיטה/שעורה	Hordeum cf. Triticum	גרגיר	grain	דגניים	Gramineae	6	6			כן		יש ברי הכרעה
HLZ-38	Elusa	Bar-Oz, Gini and Weissbrod	Daniel Fuks	2016-2018	B		7/02d	87	2015-02-01	Wet Sieve/Coarse sift		5	דגני		שברים								כן
HLZ-38	Elusa	Bar-Oz, Gini and Weissbrod	Daniel Fuks	2016-2018	B		7/02d	87	2015-02-01	Wet Sieve/Coarse sift		6	גפן	Vitis vinifera	חרצן	pip	גפניים	Vitaceae	25	25			כן
HLZ-38	Elusa	Bar-Oz, Gini and Weissbrod	Daniel Fuks	2016-2018	B		7/02d	87	2015-02-01	Wet Sieve/Coarse sift		7	זית	Olea europaea	שבר גלעין	pit fragment	זיתיים	Oleaceae	1	1			כן
HLZ-38	Elusa	Bar-Oz, Gini and Weissbrod	Daniel Fuks	2016-2018	B		7/02d	87	2015-02-01	Wet Sieve/Coarse sift		8	שיטה cf. היאור	Acacia cf. nilotica	זרע				1	1			כן		כנראה שיטת היאור
HLZ-38	Elusa	Bar-Oz, Gini and Weissbrod	Daniel Fuks	2016-2018	B		7/02d	87	2015-02-15	Wet Sieve/Coarse sift		9	מתנן שעיר	Thymelaea hirsuta	אגוזית				2	2			כן		אחד שבור
HLZ-38	Elusa	Bar-Oz, Gini and Weissbrod	Daniel Fuks	2016-2018	B		7/02d	87	2015-02-15	Wet Sieve/Coarse sift		10	דלועי	Cucurbitaceae	זרע	seed	דלועיים	Cucurbitaceae	1	1	יואל עסק ורשם אך לא הצליח להגדיר למין		כן
HLZ-38	Elusa	Bar-Oz, Gini and Weissbrod	Daniel Fuks	2016-2018	B		7/02d	87	2015-02-01	Wet Sieve/Coarse sift		11	אלה	Pistacia sp.					1	1			כן				לחזור לזה מאוחר יותר
HLZ-38	Elusa	Bar-Oz, Gini and Weissbrod	Daniel Fuks	2016-2018	B		7/02d	87	2015-02-01	Wet Sieve/Coarse sift		12	בלתי מזוהה						1	1	להמשך		כן				לחזור לזה מאוחר יותר
HLZ-38	Elusa	Bar-Oz, Gini and Weissbrod	Daniel Fuks	2016-2018	B		7/02d	87	2015-02-01	Wet Sieve/Coarse sift		13	בלתי מזוהה		שונות								כן		לא נראה לי ששווה מאמץ
HLZ-38	Elusa	Bar-Oz, Gini and Weissbrod	Daniel Fuks	2016-2018	B		7/02d	87	2015-02-01	Wet Sieve/Coarse sift		14	בלתי מזוהה		עוקץ				1	1			כן
HLZ-38	Elusa	Bar-Oz, Gini and Weissbrod	Daniel Fuks	2016-2018	B		7/02d	87	2015-02-01	Wet Sieve/Coarse sift		15	עדשה תרבותית	Lens culinaris	זרע	seed	פרפרניים	Fabaceae	3	3			כן		באישור יעל, אחד מצטרף
HLZ-38	Elusa	Bar-Oz, Gini and Weissbrod	Daniel Fuks	2016-2018	B		7/02d	87	2015-02-01	Wet Sieve/Coarse sift		16	בקיית הכרשינה	Vicia ervilia	זרע	seed	פרפרניים	Fabaceae	1	1			כן
HLZ-38	Elusa	Bar-Oz, Gini and Weissbrod	Daniel Fuks	2016-2018	B		7/02d	87	2015-02-01	Wet Sieve/Coarse sift		17	cf. אוג הבורסקאים	cf. Rhus coriaria	זרע	seed			1	1			כן		ראה 40-12	להגדרה	לזיהוי
HLZ-38	Elusa	Bar-Oz, Gini and Weissbrod	Daniel Fuks	2016-2018	B		7/02d	87	2015-02-01	Wet Sieve/Coarse sift		18	EMPTY
HLZ-38	Elusa	Bar-Oz, Gini and Weissbrod	Daniel Fuks	2016-2018	B		7/02d	87	2015-02-01	Wet Sieve/Coarse sift		19	cf. חרוב מצויב	cf. Ceratonia siliqua	זרע	seed	כליליים	Caesalpiniaceae	1	1			כן		ליואל כשיש לו זמן		בהסתכלות ראשונית לא ראה במה להיתפס
HLZ-38	Elusa	Bar-Oz, Gini and Weissbrod	Daniel Fuks	2016-2018	B		7/02d	87	2015-02-01	Wet Sieve/Coarse sift		20	בקיים	Vicieae	זרע	seed	פרפרניים	Fabaceae	1	1			כן		שרוף
HLZ-38	Elusa	Bar-Oz, Gini and Weissbrod	Daniel Fuks	2016-2018	B		7/02d	87	2015-02-01	Wet Sieve/Coarse sift		21	קטנית		שברי זרע	seed	פרפרניים	Fabaceae					כן		אולי גם אנדוספרם של גפן
HLZ-38	Elusa	Bar-Oz, Gini and Weissbrod	Daniel Fuks	2016-2018	B		7/02d	87	2015-02-01	Wet Sieve/Coarse sift		22	קטנית		זרע	seed	פרפרניים	Fabaceae	1	1	נראה לי טופח		כן		כנראה בקיה-טופח	יעל: בהעמדה נכונה יוכל אולי להצטרף למשהו
HLZ-39	Elusa	Bar-Oz, Gini and Weissbrod	Daniel Fuks	2016-2018	B		7/03c	94	2015-02-01	Coarse sieve		1	זית	Olea europaea	גלעין	pit	זיתיים	Oleaceae	2	2			כן		אחד שלם ואחד שבר קטן
HLZ-4	Elusa	Bar-Oz, Gini and Weissbrod	Daniel Fuks, Yael Slasky	2015	A1	1	1/02a	12	2015-02-01	Wet Sieve Picking	24	1	שעורה	Hordeum	גרגיר	grain	דגניים	Gramineae	4	4			כן		אחד שבור
HLZ-4	Elusa	Bar-Oz, Gini and Weissbrod	Daniel Fuks, Yael Slasky	2015	A1	1	1/02a	12	2015-02-01	Wet Sieve Picking		2	גפן	Vitis vinifera	חרצן	pip	גפניים	Vitaceae	1	1		כן
HLZ-40	Elusa	Bar-Oz, Gini and Weissbrod	Daniel Fuks	2016-2018	B		7/03d	91	2015-02-01	Wet Sieve/Coarse sift		1	תמר	Phoenix dactylifera	גלעין	seed	דקליים	Palmae	5	5			כן		הופרד למסירה לגיל זאבי
HLZ-40	Elusa	Bar-Oz, Gini and Weissbrod	Daniel Fuks	2016-2018	B		7/03d	91	2015-02-01	Wet Sieve/Coarse sift		2	זחל בדגן		חביונה וגרגיר				2	1+1			כן
HLZ-40	Elusa	Bar-Oz, Gini and Weissbrod	Daniel Fuks	2016-2018	B		7/03d	91	2015-02-01	Wet Sieve/Coarse sift		3	שעורה	Hordeum	גרגיר	grain	דגניים	Gramineae	50	50			כן
HLZ-40	Elusa	Bar-Oz, Gini and Weissbrod	Daniel Fuks	2016-2018	B		7/03d	91	2015-02-01	Wet Sieve/Coarse sift		4	חיטה	Triticum	גרגיר	grain	דגניים	Gramineae	2	2			כן		גם זה לא 100%
HLZ-40	Elusa	Bar-Oz, Gini and Weissbrod	Daniel Fuks	2016-2018	B		7/03d	91	2015-02-01	Wet Sieve/Coarse sift		5	חיטה/שעורה	Hordeum cf. Triticum	גרגיר	grain	דגניים	Gramineae	21	21			כן		כנראה שיש כמה חיטים כאן
HLZ-40	Elusa	Bar-Oz, Gini and Weissbrod	Daniel Fuks	2016-2018	B		7/03d	91	2015-02-01	Wet Sieve/Coarse sift		6	דגני		שברי גרגיר								כן
HLZ-40	Elusa	Bar-Oz, Gini and Weissbrod	Daniel Fuks	2016-2018	B		7/03d	91	2015-02-01	Wet Sieve/Coarse sift		7	גפן	Vitis vinifera	חרצן	pip	גפניים	Vitaceae	21	21			כן		לפי עוקצים, MNI=22
HLZ-40	Elusa	Bar-Oz, Gini and Weissbrod	Daniel Fuks	2016-2018	B		7/03d	91	2015-02-01	Wet Sieve/Coarse sift		8	זנב עקרב שיכני?		זרע				1	1			כן
HLZ-40	Elusa	Bar-Oz, Gini and Weissbrod	Daniel Fuks	2016-2018	B		7/03d	91	2015-02-01	Wet Sieve/Coarse sift		9	דבקה	Galium	פרודה		פואתיים	Rubiaceae	1	1			כן
HLZ-40	Elusa	Bar-Oz, Gini and Weissbrod	Daniel Fuks	2016-2018	B		7/03d	91	2015-02-01	Wet Sieve/Coarse sift		10	עדשה תרבותית	Lens culinaris	זרע	seed	פרפרניים	Fabaceae	20	20			כן		באישור יעל	חצאים נספרו כחצי
HLZ-40	Elusa	Bar-Oz, Gini and Weissbrod	Daniel Fuks	2016-2018	B		7/03d	91	2015-02-01	Wet Sieve/Coarse sift		11	קטנית		שברי זרע	seed	פרפרניים	Fabaceae	1	1			כן		עם חתיכה שאולי מצטרפת
HLZ-40	Elusa	Bar-Oz, Gini and Weissbrod	Daniel Fuks	2016-2018	B		7/03d	91	2015-02-01	Wet Sieve/Coarse sift		12	cf. אוג הבורסקאים	cf. Rhus coriaria	זרע	seed			1	1			כן		להשוות ל-38-17	להגדרה	טיפוס אחירותם בצורה אך לא בטבורית , גם קידה ורותם לא. לבדוק אוג, אלת המסטיק ואז פרפרניים. לא לחפש בקיים, תלתן, אספסת, שברק, לוטוס, כנראה לא קדד...
HLZ-40	Elusa	Bar-Oz, Gini and Weissbrod	Daniel Fuks	2016-2018	B		7/03d	91	2015-02-01	Wet Sieve/Coarse sift		13	בלתי מזוהה						4	4			כן
HLZ-40	Elusa	Bar-Oz, Gini and Weissbrod	Daniel Fuks	2016-2018	B		7/03d	91	2015-02-01	Wet Sieve/Coarse sift		14	בלתי מזוהה										כן		נראה שברים של משהו שהיה מחובר פעם
HLZ-40	Elusa	Bar-Oz, Gini and Weissbrod	Daniel Fuks	2016-2018	B		7/03d	91	2015-02-01	Wet Sieve/Coarse sift		15	בלתי מזוהה										כן		לא להתעסק
HLZ-40	Elusa	Bar-Oz, Gini and Weissbrod	Daniel Fuks	2016-2018	B		7/03d	91	2015-02-01	Wet Sieve/Coarse sift		16	בלתי מזוהה		פסיג?				1	1			כן		מזכיר פסיג עדשה אך קעור באמצע
HLZ-40	Elusa	Bar-Oz, Gini and Weissbrod	Daniel Fuks	2016-2018	B		7/03d	91	2015-02-01	Wet Sieve/Coarse sift		17	בקיים		זרע	seed	פרפרניים	Fabaceae	4	4			כן		קטנית כדורית		לא להתעסק עכשיו
HLZ-40	Elusa	Bar-Oz, Gini and Weissbrod	Daniel Fuks	2016-2018	B		7/03d	91	2015-02-01	Wet Sieve/Coarse sift		18	בקיית הכרשינה	Vicia ervilia	זרע	seed	פרפרניים	Fabaceae	1	1			כן
HLZ-41	Elusa	Bar-Oz, Gini and Weissbrod	Daniel Fuks	2016-2018	B		7/04c	98	2015-02-01	Coarse sieve		1	זית	Olea europaea	גלעין	pit	זיתיים	Oleaceae	1	1			כן
HLZ-42	Elusa	Bar-Oz, Gini and Weissbrod	Daniel Fuks	2016-2018	B		7/04d	95	2015-02-01	Wet Sieve/Coarse sift		1	שעורה	Hordeum	גרגיר	grain	דגניים	Gramineae	15	15			כן
HLZ-42	Elusa	Bar-Oz, Gini and Weissbrod	Daniel Fuks	2016-2018	B		7/04d	95	2015-02-01	Wet Sieve/Coarse sift		2	חיטה	Triticum	גרגיר	grain	דגניים	Gramineae	2	2			כן		אחד לא בטוח לגמרי
HLZ-42	Elusa	Bar-Oz, Gini and Weissbrod	Daniel Fuks	2016-2018	B		7/04d	95	2015-02-01	Wet Sieve/Coarse sift		3	חיטה/שעורה	Hordeum cf. Triticum	גרגיר	grain	דגניים	Gramineae	9	9			כן		לחזור בהזדמנ
HLZ-42	Elusa	Bar-Oz, Gini and Weissbrod	Daniel Fuks	2016-2018	B		7/04d	95	2015-02-15	Wet Sieve/Coarse sift		4	דגני		שברי גרגיר				5	5			כן
HLZ-42	Elusa	Bar-Oz, Gini and Weissbrod	Daniel Fuks	2016-2018	B		7/04d	95	2015-02-15	Wet Sieve/Coarse sift		5	גפן	Vitis vinifera	חרצן	pip	גפניים	Vitaceae	35	35			כן		מספר שנשברו, המספר לפי עוקצים וMNI
HLZ-42	Elusa	Bar-Oz, Gini and Weissbrod	Daniel Fuks	2016-2018	B		7/04d	95	2015-02-01	Wet Sieve/Coarse sift		6	עדשה תרבותית	Lens culinaris	זרע	seed	פרפרניים	Fabaceae	6	6			כן		באישור יעל
HLZ-42	Elusa	Bar-Oz, Gini and Weissbrod	Daniel Fuks	2016-2018	B		7/04d	95	2015-02-01	Wet Sieve/Coarse sift		7	קטנית		זרע	seed	פרפרניים	Fabaceae	3	3			כן		יעל: יכולים להצטרף בהמשך, אחד עם טבורית מוארכת, חשש לבקיה תרבותית
HLZ-42	Elusa	Bar-Oz, Gini and Weissbrod	Daniel Fuks	2016-2018	B		7/04d	95	2015-02-01	Wet Sieve/Coarse sift		8	שן						1	1			כן		זרע??
HLZ-42	Elusa	Bar-Oz, Gini and Weissbrod	Daniel Fuks	2016-2018	B		7/04d	95	2015-02-01	Wet Sieve/Coarse sift		9	בלתי מזוהה		שברים								כן
HLZ-43	Elusa	Bar-Oz, Gini and Weissbrod	Daniel Fuks	2016-2018	B		7/05d	99	2015-02-01	Wet Sieve/Coarse sift		1	שעורה	Hordeum	גרגיר	grain	דגניים	Gramineae	13	13			כן
HLZ-43	Elusa	Bar-Oz, Gini and Weissbrod	Daniel Fuks	2016-2018	B		7/05d	99	2015-02-01	Wet Sieve/Coarse sift		2	חיטה/שעורה	Hordeum cf. Triticum	גרגיר	grain	דגניים	Gramineae	7	7			כן
HLZ-43	Elusa	Bar-Oz, Gini and Weissbrod	Daniel Fuks	2016-2018	B		7/05d	99	2015-02-01	Wet Sieve/Coarse sift		3	גפן	Vitis vinifera	חרצן	pip	גפניים	Vitaceae	44	44			כן
HLZ-43	Elusa	Bar-Oz, Gini and Weissbrod	Daniel Fuks	2016-2018	B		7/05d	99	2015-02-01	Wet Sieve/Coarse sift		4	תמר	Phoenix dactylifera	גלעין	seed	דקליים	Palmae	2	2			כן		הופרד למסירה לגיל זאבי
HLZ-43	Elusa	Bar-Oz, Gini and Weissbrod	Daniel Fuks	2016-2018	B		7/05d	99	2015-02-01	Wet Sieve/Coarse sift		5	ארנבית זיפנית/ גלעינית זעירת פרחים	Buglossoides tenuiflora/Arnebia hispidissima					1	1			כן
HLZ-43	Elusa	Bar-Oz, Gini and Weissbrod	Daniel Fuks	2016-2018	B		7/05d	99	2015-02-01	Wet Sieve/Coarse sift		6	בלתי מזוהה										כן		דבקה??
HLZ-43	Elusa	Bar-Oz, Gini and Weissbrod	Daniel Fuks	2016-2018	B		7/05d	99	2015-02-15	Wet Sieve/Coarse sift		7	מתנן שעיר	Thymelaea hirsuta					1	1			כן
HLZ-43	Elusa	Bar-Oz, Gini and Weissbrod	Daniel Fuks	2016-2018	B		7/05d	99	2015-02-15	Wet Sieve/Coarse sift		8	בלתי מזוהה		בלתי ושברים								כן		לא כדאי להתעסק
HLZ-43	Elusa	Bar-Oz, Gini and Weissbrod	Daniel Fuks	2016-2018	B		7/05d	99	2015-02-01	Wet Sieve/Coarse sift		9	עדשה תרבותית	Lens culinaris	זרע	seed	פרפרניים	Fabaceae	29	29			כן			23שלמים ו11 חצאים
HLZ-43	Elusa	Bar-Oz, Gini and Weissbrod	Daniel Fuks	2016-2018	B		7/05d	99	2015-02-01	Wet Sieve/Coarse sift		10	טופח מצוי cf.	Lathyrus aphaca cf.	זרע	seed	פרפרניים	Fabaceae	1	1			כן		פרטים במחברת		טופח מצוי cf. כי העדשה לא ברורה
HLZ-43	Elusa	Bar-Oz, Gini and Weissbrod	Daniel Fuks	2016-2018	B		7/05d	99	2015-02-01	Wet Sieve/Coarse sift		11	דבקה	Galium	פרודה		פואתיים	Rubiaceae	1	1			כן
HLZ-43	Elusa	Bar-Oz, Gini and Weissbrod	Daniel Fuks	2016-2018	B		7/05d	99	2015-02-01	Wet Sieve/Coarse sift		12	בלתי מזוהה	unidentified	זרע	seed			3	3			כן		צורה כדורית		אין מה לטפל בזה עכשיו
HLZ-43	Elusa	Bar-Oz, Gini and Weissbrod	Daniel Fuks	2016-2018	B		7/05d	99	2015-02-01	Wet Sieve/Coarse sift		13	קטנית		זרע	seed	פרפרניים	Fabaceae	2	2			כן		3 חצאים	יעל: אולי כרשינה
HLZ-44	Elusa	Bar-Oz, Gini and Weissbrod	Daniel Fuks	2016-2018	A1	1b	section layer 1		2015-02-01	Dry Sift	3	1	שעורה	Hordeum vulgare	גרגיר	grain	דגניים	Gramineae	8	8	2		כן
HLZ-44	Elusa	Bar-Oz, Gini and Weissbrod	Daniel Fuks	2016-2018	A1	1b	section layer 1		2015-02-01	Dry Sift	3	2	גפן	Vitis vinifera	חרצן	pip	גפניים	Vitaceae	4	4	2		כן
HLZ-44	Elusa	Bar-Oz, Gini and Weissbrod	Daniel Fuks	2016-2018	A1	1b	section layer 1		2015-02-01	Dry Sift	3	3	גפן	Vitis vinifera	קליפה	skin	גפניים	Vitaceae			2		כן
HLZ-44	Elusa	Bar-Oz, Gini and Weissbrod	Daniel Fuks	2016-2018	A1	1b	section layer 1		2015-02-01	Dry Sift	3	4	קטנית?						1	1	2		כן						זרע פחוס מזכיר טופח ספרדי אך אין הילום, עדש, או שורשון ברורים
HLZ-44	Elusa	Bar-Oz, Gini and Weissbrod	Daniel Fuks	2016-2018	A1	1b	section layer 1		2015-02-01	Dry Sift	3	5	דגני בגלל?								2		כן
HLZ-44	Elusa	Bar-Oz, Gini and Weissbrod	Daniel Fuks	2016-2018	A1	1b	section layer 1		2015-02-01	Dry Sift	3	6			שברי גרגיר	grain fragments	דגניים	Gramineae			2		כן
HLZ-44	Elusa	Bar-Oz, Gini and Weissbrod	Daniel Fuks	2016-2018	A1	1b	section layer 1		2015-02-01	Dry Sift	3	7	בלתי-שונות								2		כן
HLZ-45	Elusa	Bar-Oz, Gini and Weissbrod	Daniel Fuks	2016-2018	A1	1b	section layer 1		2015-02-01	Dry Sift	3	1	שעורה	Hordeum vulgare	גרגיר	grain	דגניים	Gramineae	7	7	2		כן
HLZ-45	Elusa	Bar-Oz, Gini and Weissbrod	Daniel Fuks	2016-2018	A1	1b	section layer 1		2015-02-01	Dry Sift	3	2	חיטה	Triticum	גרגיר	grain	דגניים	Gramineae	1	1	2		כן
HLZ-45	Elusa	Bar-Oz, Gini and Weissbrod	Daniel Fuks	2016-2018	A1	1b	section layer 1		2015-02-01	Dry Sift	3	3	חיטה/שעורה	Hordeum cf. Triticum	גרגיר	grain	דגניים	Gramineae	2	2	2		כן
HLZ-45	Elusa	Bar-Oz, Gini and Weissbrod	Daniel Fuks	2016-2018	A1	1b	section layer 1		2015-02-15	Dry Sift	3	4	גפן	Vitis vinifera	חרצן	pip	גפניים	Vitaceae	4	4	2		כן
HLZ-45	Elusa	Bar-Oz, Gini and Weissbrod	Daniel Fuks	2016-2018	A1	1b	section layer 1		2015-02-15	Dry Sift	3	5	גפן	Vitis vinifera	עוקץ	pedicel	גפניים	Vitaceae	1	1	2		כן
HLZ-45	Elusa	Bar-Oz, Gini and Weissbrod	Daniel Fuks	2016-2018	A1	1b	section layer 1		2015-02-01	Dry Sift	3	6			פרקי דגן	culm nodes	דגניים	Gramineae	4	4	2		כן
HLZ-45	Elusa	Bar-Oz, Gini and Weissbrod	Daniel Fuks	2016-2018	A1	1b	section layer 1		2015-02-01	Dry Sift	3	7	קטנית?		שברי זרע	seed fragments					2		כן
HLZ-45	Elusa	Bar-Oz, Gini and Weissbrod	Daniel Fuks	2016-2018	A1	1b	section layer 1		2015-02-01	Dry Sift	3	8			שברי גרגיר	grain fragments	דגניים	Gramineae			2		כן
HLZ-46	Elusa	Bar-Oz, Gini and Weissbrod	Daniel Fuks	2016-2018	A1	1b	section layer 1		2015-02-01	Dry Sift	3	1	שעורה	Hordeum vulgare	גרגיר	grain	דגניים	Gramineae	10	10	2		כן
HLZ-46	Elusa	Bar-Oz, Gini and Weissbrod	Daniel Fuks	2016-2018	A1	1b	section layer 1		2015-02-01	Dry Sift	3	2	גפן	Vitis vinifera	חרצן	pip	גפניים	Vitaceae	4	4	2		כן
HLZ-46	Elusa	Bar-Oz, Gini and Weissbrod	Daniel Fuks	2016-2018	A1	1b	section layer 1		2015-02-01	Dry Sift	3	3			פרקי דגן	culm nodes	דגניים	Gramineae	3	3	2		כן
HLZ-46	Elusa	Bar-Oz, Gini and Weissbrod	Daniel Fuks	2016-2018	A1	1b	section layer 1		2015-02-01	Dry Sift	3	4			שברי גרגיר	grain fragments	דגניים	Gramineae			2		כן
HLZ-46	Elusa	Bar-Oz, Gini and Weissbrod	Daniel Fuks	2016-2018	A1	1b	section layer 1		2015-02-01	Dry Sift	3	5	בלתי-שונות								2		כן
HLZ-46	Elusa	Bar-Oz, Gini and Weissbrod	Daniel Fuks	2016-2018	A1	1b	section layer 1		2015-02-01	Dry Sift	3	6	חרק								2		כן
HLZ-47	Elusa	Bar-Oz, Gini and Weissbrod	Daniel Fuks	2016-2018	A1	1b	section layer 1		2015-02-01	Dry Sift	check	1	שעורה	Hordeum vulgare	גרגיר	grain	דגניים	Gramineae	9	9	2				double check for Avena sterilis
HLZ-47	Elusa	Bar-Oz, Gini and Weissbrod	Daniel Fuks	2016-2018	A1	1b	section layer 1		2015-02-01	Dry Sift	check	2	חיטה/שעורה	Hordeum cf. Triticum	גרגיר	grain	דגניים	Gramineae	1	1	2
HLZ-47	Elusa	Bar-Oz, Gini and Weissbrod	Daniel Fuks	2016-2018	A1	1b	section layer 1		2015-02-01	Dry Sift	check	3	גפן	Vitis vinifera	חרצן	pip	גפניים	Vitaceae	4	4	2
HLZ-47	Elusa	Bar-Oz, Gini and Weissbrod	Daniel Fuks	2016-2018	A1	1b	section layer 1		2015-02-01	Dry Sift	check	4	בלתי-שונות								2
HLZ-48	Elusa	Bar-Oz, Gini and Weissbrod	Daniel Fuks	2016-2018	A1	1b	section layer 2		2015-02-01	Dry Sift	10	1	שעורה	Hordeum vulgare	גרגיר	grain	דגניים	Gramineae	6	6	2
HLZ-48	Elusa	Bar-Oz, Gini and Weissbrod	Daniel Fuks	2016-2018	A1	1b	section layer 2		2015-02-01	Dry Sift	10	2	חיטה	Triticum	גרגיר	grain	דגניים	Gramineae	1	1	2
HLZ-48	Elusa	Bar-Oz, Gini and Weissbrod	Daniel Fuks	2016-2018	A1	1b	section layer 2		2015-02-01	Dry Sift	10	3	חיטה/שעורה	Hordeum cf. Triticum	גרגיר	grain	דגניים	Gramineae	1	1	2
HLZ-48	Elusa	Bar-Oz, Gini and Weissbrod	Daniel Fuks	2016-2018	A1	1b	section layer 2		2015-02-01	Dry Sift	10	4	גפן	Vitis vinifera	חרצן	pip	גפניים	Vitaceae	15	15	2
HLZ-48	Elusa	Bar-Oz, Gini and Weissbrod	Daniel Fuks	2016-2018	A1	1b	section layer 2		2015-02-01	Dry Sift	10	5	חיטה טטרפלוידית	Triticum turgidum s.l.	פרק ציר שיבולת	rachis fragment	דגניים	Gramineae	1	1	2
HLZ-48	Elusa	Bar-Oz, Gini and Weissbrod	Daniel Fuks	2016-2018	A1	1b	section layer 2		2015-02-01	Dry Sift	10	6	שעורה?	Hordeum?	גלומה	glume	דגניים	Gramineae	1	1	2
HLZ-48	Elusa	Bar-Oz, Gini and Weissbrod	Daniel Fuks	2016-2018	A1	1b	section layer 2		2015-02-01	Dry Sift	10	7			פרקי דגן	culm nodes	דגניים	Gramineae	2	2	2
HLZ-48	Elusa	Bar-Oz, Gini and Weissbrod	Daniel Fuks	2016-2018	A1	1b	section layer 2		2015-02-01	Dry Sift	10	8	גפן	Vitis vinifera	קליפה	skin	גפניים	Vitaceae			2
HLZ-48	Elusa	Bar-Oz, Gini and Weissbrod	Daniel Fuks	2016-2018	A1	1b	section layer 2		2015-02-01	Dry Sift	10	9	קטנית? עדשה?						5	5	2
HLZ-48	Elusa	Bar-Oz, Gini and Weissbrod	Daniel Fuks	2016-2018	A1	1b	section layer 2		2015-02-01	Dry Sift	10	10	מתנן שעיר	Thymelaea hirsuta	עלים וענפים	leaves, branches	מתנניים	Thymelaceae			2
HLZ-48	Elusa	Bar-Oz, Gini and Weissbrod	Daniel Fuks	2016-2018	A1	1b	section layer 2		2015-02-01	Dry Sift	10	11	פיקוס התאנה?	Ficus carica?	אגוזית	nutlet			1	1	2
HLZ-48	Elusa	Bar-Oz, Gini and Weissbrod	Daniel Fuks	2016-2018	A1	1b	section layer 2		2015-02-01	Dry Sift	10	12	דמומית משוננת?	Adonis dentata?					1	1	2
HLZ-48	Elusa	Bar-Oz, Gini and Weissbrod	Daniel Fuks	2016-2018	A1	1b	section layer 2		2015-02-01	Dry Sift	10	13			גביע	calyx	חלמיתיים? מורכבים?				2
HLZ-48	Elusa	Bar-Oz, Gini and Weissbrod	Daniel Fuks	2016-2018	A1	1b	section layer 2		2015-02-01	Dry Sift	10	14	בלתי								2
HLZ-48	Elusa	Bar-Oz, Gini and Weissbrod	Daniel Fuks	2016-2018	A1	1b	section layer 2		2015-02-01	Dry Sift	10	15	בלתי-שונות								2
HLZ-48	Elusa	Bar-Oz, Gini and Weissbrod	Daniel Fuks	2016-2018	A1	1b	section layer 2	2	2015-02-01	Dry Sift	10	16	חיטה טטרפלוידית	Triticum turgidum s.l.	פרק ציר שיבולת	rachis fragment	דגניים	Gramineae	1	1	1mm-subsample1				glume wheat??
HLZ-48	Elusa	Bar-Oz, Gini and Weissbrod	Daniel Fuks	2016-2018	A1	1b	section layer 2	2	2015-02-01	Dry Sift	10	17	שעורה עם גלל	Hordeum	פרק ציר שיבולת	rachis fragment	דגניים	Gramineae	1	1	1mm-subsample1
HLZ-48	Elusa	Bar-Oz, Gini and Weissbrod	Daniel Fuks	2016-2018	A1	1b	section layer 2	2	2015-02-01	Dry Sift	10	18	שעורה	Hordeum	פרק ציר שיבולת	rachis fragment	דגניים	Gramineae	2	2	1mm-subsample1
HLZ-48	Elusa	Bar-Oz, Gini and Weissbrod	Daniel Fuks	2016-2018	A1	1b	section layer 2	2	2015-02-01	Dry Sift	10	19	דגני		גרגיר	grain	דגניים	Gramineae	1	1	1mm-subsample1
HLZ-48	Elusa	Bar-Oz, Gini and Weissbrod	Daniel Fuks	2016-2018	A1	1b	section layer 2	2	2015-02-01	Dry Sift	10	20	גפן	Vitis vinifera	עוקץ	pedicel	גפניים	Vitaceae	1	1	1mm-subsample1
HLZ-48	Elusa	Bar-Oz, Gini and Weissbrod	Daniel Fuks	2016-2018	A1	1b	section layer 2	2	2015-02-01	Dry Sift	10	21	גפן	Vitis vinifera	שברי חרצן		גפניים	Vitaceae	7	7	1mm-subsample1
HLZ-48	Elusa	Bar-Oz, Gini and Weissbrod	Daniel Fuks	2016-2018	A1	1b	section layer 2	2	2015-02-01	Dry Sift	10	22	מתנן שעיר	Thymelaea hirsuta	אגוזית	nutlet	מתנניים	Thymelaceae	4	4	1mm-subsample1
HLZ-48	Elusa	Bar-Oz, Gini and Weissbrod	Daniel Fuks	2016-2018	A1	1b	section layer 2	2	2015-02-01	Dry Sift	10	23	מתנן שעיר	Thymelaea hirsuta	עלה	leaf	מתנניים	Thymelaceae	70	70	1mm-subsample1
HLZ-48	Elusa	Bar-Oz, Gini and Weissbrod	Daniel Fuks	2016-2018	A1	1b	section layer 2	2	2015-02-01	Dry Sift	10	24	מתנן שעיר	Thymelaea hirsuta	ניצן	bud	מתנניים	Thymelaceae	2	2	1mm-subsample1				קצותענף
HLZ-48	Elusa	Bar-Oz, Gini and Weissbrod	Daniel Fuks	2016-2018	A1	1b	section layer 2	2	2015-02-15	Dry Sift	10	25	אשל הפרקים	Tamarix aphylla	פרקי עלים	leaf segments			4	4	1mm-subsample1
HLZ-48	Elusa	Bar-Oz, Gini and Weissbrod	Daniel Fuks	2016-2018	A1	1b	section layer 2	2	2015-02-15	Dry Sift	10	26				culm nodes			1	1	1mm-subsample1
HLZ-48	Elusa	Bar-Oz, Gini and Weissbrod	Daniel Fuks	2016-2018	A1	1b	section layer 2	2	2015-02-01	Dry Sift	10	27	ליואל								1mm-subsample1								חותם תמר? ועוד
HLZ-48	Elusa	Bar-Oz, Gini and Weissbrod	Daniel Fuks	2016-2018	A1	1b	section layer 2	2	2015-02-01	Dry Sift	10	28	שיבולת שועל? - ליואל						1	1	1mm-subsample1
HLZ-48	Elusa	Bar-Oz, Gini and Weissbrod	Daniel Fuks	2016-2018	A1	1b	section layer 2	2	2015-02-01	Dry Sift	10	29	להגדיר בהמשך						5	5	1mm-subsample1
HLZ-48	Elusa	Bar-Oz, Gini and Weissbrod	Daniel Fuks	2016-2018	A1	1b	section layer 2	2	2015-02-01	Dry Sift	10	30	בלתי - שונות								1mm-subsample1
HLZ-48	Elusa	Bar-Oz, Gini and Weissbrod	Daniel Fuks	2016-2018	A1	1b	section layer 2	2	2015-02-01	Dry Sift	10	31	שעורה עם גלל	Hordeum		rachis	דגניים	Gramineae	1	1	1mm-subsample2
HLZ-48	Elusa	Bar-Oz, Gini and Weissbrod	Daniel Fuks	2016-2018	A1	1b	section layer 2	2	2015-02-01	Dry Sift	10	32	חיטה טטרפלוידית	Triticum turgidum s.l.		rachis	דגניים	Gramineae	1	1	1mm-subsample2
HLZ-48	Elusa	Bar-Oz, Gini and Weissbrod	Daniel Fuks	2016-2018	A1	1b	section layer 2	2	2015-02-01	Dry Sift	10	33	גפן	Vitis vinifera	עוקץ	pedicel	גפניים	Vitaceae	1	1	1mm-subsample2
HLZ-48	Elusa	Bar-Oz, Gini and Weissbrod	Daniel Fuks	2016-2018	A1	1b	section layer 2	2	2015-02-01	Dry Sift	10	34	גפן	Vitis vinifera	שבר חרצן		גפניים	Vitaceae			1mm-subsample2
HLZ-48	Elusa	Bar-Oz, Gini and Weissbrod	Daniel Fuks	2016-2018	A1	1b	section layer 2	2	2015-02-01	Dry Sift	10	35	מתנן שעיר	Thymelaea hirsuta	אגוזית	nutlet	מתנניים	Thymelaceae	3	3	1mm-subsample2
HLZ-48	Elusa	Bar-Oz, Gini and Weissbrod	Daniel Fuks	2016-2018	A1	1b	section layer 2	2	2015-02-01	Dry Sift	10	36	מתנן שעיר	Thymelaea hirsuta	עלה	leaf	מתנניים	Thymelaceae	75	75	1mm-subsample2
HLZ-48	Elusa	Bar-Oz, Gini and Weissbrod	Daniel Fuks	2016-2018	A1	1b	section layer 2	2	2015-02-15	Dry Sift	10	37	מתנן שעיר	Thymelaea hirsuta	ניצן	bud	מתנניים	Thymelaceae	6	6	1mm-subsample2				קצה ענף
HLZ-48	Elusa	Bar-Oz, Gini and Weissbrod	Daniel Fuks	2016-2018	A1	1b	section layer 2	2	2015-02-15	Dry Sift	10	38	ליואל								1mm-subsample2								כנראה אשליל
HLZ-48	Elusa	Bar-Oz, Gini and Weissbrod	Daniel Fuks	2016-2018	A1	1b	section layer 2	2	2015-02-01	Dry Sift	10	39	מתנן שעיר	Thymelaea hirsuta	עלה	leaf	מתננים	Thymelaceae	2	2	1mm-subsample2
HLZ-48	Elusa	Bar-Oz, Gini and Weissbrod	Daniel Fuks	2016-2018	A1	1b	section layer 2	2	2015-02-01	Dry Sift	10	40	בלתי - שונות								1mm-subsample2				לחזור בהמשך
HLZ-48	Elusa	Bar-Oz, Gini and Weissbrod	Daniel Fuks	2016-2018	A1	1b	section layer 2	2	2015-02-01	Dry Sift	10	41	בלתי						3	3	1mm-subsample2				אשל הפרקים?
HLZ-48	Elusa	Bar-Oz, Gini and Weissbrod	Daniel Fuks	2016-2018	A1	1b	section layer 2	2	2015-02-01	Dry Sift	10	42	חיטה טטרפלוידית	Triticum turgidum s.l.		rachis	דגניים	Gramineae	1	1	1mm-subsample3
HLZ-48	Elusa	Bar-Oz, Gini and Weissbrod	Daniel Fuks	2016-2018	A1	1b	section layer 2	2	2015-02-01	Dry Sift	10	43	שעורה עם גלל	Hordeum		rachis with dung	דגניים	Gramineae	2	2	1mm-subsample3
HLZ-48	Elusa	Bar-Oz, Gini and Weissbrod	Daniel Fuks	2016-2018	A1	1b	section layer 2	2	2015-02-01	Dry Sift	10	44	שעורה	Hordeum		rachis	דגניים	Gramineae	2	2	1mm-subsample3
HLZ-48	Elusa	Bar-Oz, Gini and Weissbrod	Daniel Fuks	2016-2018	A1	1b	section layer 2	2	2015-02-01	Dry Sift	10	45		Salsoleae					1	1	1mm-subsample3
HLZ-48	Elusa	Bar-Oz, Gini and Weissbrod	Daniel Fuks	2016-2018	A1	1b	section layer 2	2	2015-02-01	Dry Sift	10	46	לעתיד-ליואל						1	1	1mm-subsample3
HLZ-48	Elusa	Bar-Oz, Gini and Weissbrod	Daniel Fuks	2016-2018	A1	1b	section layer 2	2	2015-02-01	Dry Sift	10	47	אשל הפרקים	Tamarix aphylla		segment			3	3	1mm-subsample3
HLZ-48	Elusa	Bar-Oz, Gini and Weissbrod	Daniel Fuks	2016-2018	A1	1b	section layer 2	2	2015-02-01	Dry Sift	10	48	מתנן שעיר	Thymelaea hirsuta	עלה	leaf	מתנניים	Thymelaceae	67	67	1mm-subsample3
HLZ-48	Elusa	Bar-Oz, Gini and Weissbrod	Daniel Fuks	2016-2018	A1	1b	section layer 2	2	2015-02-01	Dry Sift	10	49	בלתי		ענבה				1	1	1mm-subsample3
HLZ-48	Elusa	Bar-Oz, Gini and Weissbrod	Daniel Fuks	2016-2018	A1	1b	section layer 2	2	2015-02-01	Dry Sift	10	50	בלתי - שונות								1mm-subsample3
HLZ-48	Elusa	Bar-Oz, Gini and Weissbrod	Daniel Fuks	2016-2018	A1	1b	section layer 2	2	2015-02-01	Dry Sift	10	51	מתנן שעיר	Thymelaea hirsuta	אגוזית	nutlet	מתנניים	Thymelaceae	5	5	1mm-subsample3
HLZ-48	Elusa	Bar-Oz, Gini and Weissbrod	Daniel Fuks	2016-2018	A1	1b	section layer 2	2	2015-02-01	Dry Sift	10	52	מתנן שעיר	Thymelaea hirsuta	ניצן	bud	מתנניים	Thymelaceae	8	8	1mm-subsample3
HLZ-48	Elusa	Bar-Oz, Gini and Weissbrod	Daniel Fuks	2016-2018	A1	1b	section layer 2	2	2015-02-01	Dry Sift	10	53	גפן	Vitis vinifera	עוקץ	pedicel	גפניים	Vitaceae	1	1	1mm-subsample3
HLZ-48	Elusa	Bar-Oz, Gini and Weissbrod	Daniel Fuks	2016-2018	A1	1b	section layer 2	2	2015-02-15	Dry Sift	10	54	גפן	Vitis vinifera	חרצן		גפניים	Vitaceae	1	1	1mm-subsample3
HLZ-48	Elusa	Bar-Oz, Gini and Weissbrod	Daniel Fuks	2016-2018	A1	1b	section layer 2	2	2015-02-15	Dry Sift	10	55	גפן	Vitis vinifera	שברי חרצן		גפניים	Vitaceae			1mm-subsample3
HLZ-48	Elusa	Bar-Oz, Gini and Weissbrod	Daniel Fuks	2016-2018	A1	1b	section layer 2	2	2015-02-01	Dry Sift	10	56	תאנה?	Ficus carica?	?	?			3	3	1mm-subsample3
HLZ-48	Elusa	Bar-Oz, Gini and Weissbrod	Daniel Fuks	2016-2018	A1	1b	section layer 2	2	2015-02-01	Dry Sift	10	57	תאנה	Ficus carica	אגוזית	nutlet			1	1	1mm-subsample3
HLZ-48	Elusa	Bar-Oz, Gini and Weissbrod	Daniel Fuks	2016-2018	A1	1b	section layer 2	2	2015-02-01	Dry Sift	10	58	ארנבית שרועה	Arnebia decumbens	זרע?		זיפניים	Boraginaceae	1	1	1mm-subsample3
HLZ-48	Elusa	Bar-Oz, Gini and Weissbrod	Daniel Fuks	2016-2018	A1	1b	section layer 2	2	2015-02-01	Dry Sift	10	59	דגני			rachis	דגניים	Gramineae	2	2	1mm-subsample4
HLZ-48	Elusa	Bar-Oz, Gini and Weissbrod	Daniel Fuks	2016-2018	A1	1b	section layer 2	2	2015-02-01	Dry Sift	10	60	גפן	Vitis vinifera	עוקץ	pedicel	גפניים		3	3	1mm-subsample4
HLZ-48	Elusa	Bar-Oz, Gini and Weissbrod	Daniel Fuks	2016-2018	A1	1b	section layer 2	2	2015-02-01	Dry Sift	10	61	גפן	Vitis vinifera	שברי חרצן		גפניים	Vitaceae			1mm-subsample4
HLZ-48	Elusa	Bar-Oz, Gini and Weissbrod	Daniel Fuks	2016-2018	A1	1b	section layer 2	2	2015-02-01	Dry Sift	10	62	תאנה?	Ficus carica?	אגוזית	nutlet			1	1	1mm-subsample4
HLZ-48	Elusa	Bar-Oz, Gini and Weissbrod	Daniel Fuks	2016-2018	A1	1b	section layer 2	2	2015-02-01	Dry Sift	10	63				culm nodes			1	1	1mm-subsample4
HLZ-48	Elusa	Bar-Oz, Gini and Weissbrod	Daniel Fuks	2016-2018	A1	1b	section layer 2	2	2015-02-01	Dry Sift	10	64	אשל הפרקים	Tamarix aphylla		segment			3	3	1mm-subsample4
HLZ-48	Elusa	Bar-Oz, Gini and Weissbrod	Daniel Fuks	2016-2018	A1	1b	section layer 2	2	2015-02-01	Dry Sift	10	65	מתנן שעיר	Thymelaea hirsuta	עלה	leaf	מתננים	Thymelaceae	90	90	1mm-subsample4
HLZ-48	Elusa	Bar-Oz, Gini and Weissbrod	Daniel Fuks	2016-2018	A1	1b	section layer 2	2	2015-02-01	Dry Sift	10	66	מתנן שעיר	Thymelaea hirsuta	אגוזית	nutlet	מתננים	Thymelaceae	2	2	1mm-subsample4
HLZ-48	Elusa	Bar-Oz, Gini and Weissbrod	Daniel Fuks	2016-2018	A1	1b	section layer 2	2	2015-02-01	Dry Sift	10	67	מתנן שעיר	Thymelaea hirsuta	ניצן	bud	מתננים	Thymelaceae	5	5	1mm-subsample4				קצה ענף
HLZ-48	Elusa	Bar-Oz, Gini and Weissbrod	Daniel Fuks	2016-2018	A1	1b	section layer 2	2	2015-02-01	Dry Sift	10	68	ליואל						2	2	1mm-subsample4
HLZ-48	Elusa	Bar-Oz, Gini and Weissbrod	Daniel Fuks	2016-2018	A1	1b	section layer 2	2	2015-02-01	Dry Sift	10	69	בלתי - שונות								1mm-subsample4
HLZ-48	Elusa	Bar-Oz, Gini and Weissbrod	Daniel Fuks	2016-2018	A1	1b	section layer 2	2	2015-02-01	Dry Sift	10	70	בן-שלח	Reboudia pinnata	קשוות תרמיל		מצליבים	Brassicaceae	1	1	1mm-subsample4
HLZ-48	Elusa	Bar-Oz, Gini and Weissbrod	Daniel Fuks	2016-2018	A1	1b	section layer 2	2	2015-02-01	Dry Sift	10	71	מצליב						1	1	1mm-subsample4
HLZ-48	Elusa	Bar-Oz, Gini and Weissbrod	Daniel Fuks	2016-2018	A1	1b	section layer 2	2	2015-02-01	Dry Sift	10	72	שעורה שש-טורית			rachis	דגניים	Gramineae	1	1	1mm-subsample5
HLZ-48	Elusa	Bar-Oz, Gini and Weissbrod	Daniel Fuks	2016-2018	A1	1b	section layer 2	2	2015-02-01	Dry Sift	10	73	דגני			rachis	דגניים	Gramineae	2	2	1mm-subsample5
HLZ-48	Elusa	Bar-Oz, Gini and Weissbrod	Daniel Fuks	2016-2018	A1	1b	section layer 2	2	2015-02-01	Dry Sift	10	74	שעורה	Hordeum		rachis	דגניים	Gramineae	4	4	1mm-subsample5
HLZ-48	Elusa	Bar-Oz, Gini and Weissbrod	Daniel Fuks	2016-2018	A1	1b	section layer 2	2	2015-02-01	Dry Sift	10	75	גפן	Vitis vinifera	שברי חרצן		גפניים	Vitaceae			1mm-subsample5
HLZ-48	Elusa	Bar-Oz, Gini and Weissbrod	Daniel Fuks	2016-2018	A1	1b	section layer 2	2	2015-02-01	Dry Sift	10	76	תאנה	Ficus carica?	אגוזית	nutlet			2	2	1mm-subsample5
HLZ-48	Elusa	Bar-Oz, Gini and Weissbrod	Daniel Fuks	2016-2018	A1	1b	section layer 2	2	2015-02-01	Dry Sift	10	77	גפן	Vitis vinifera	עוקץ		גפניים	Vitaceae	3	3	1mm-subsample5
HLZ-48	Elusa	Bar-Oz, Gini and Weissbrod	Daniel Fuks	2016-2018	A1	1b	section layer 2	2	2015-02-01	Dry Sift	10	78	ליואל		צלקת של פרח				1	1	1mm-subsample5
HLZ-48	Elusa	Bar-Oz, Gini and Weissbrod	Daniel Fuks	2016-2018	A1	1b	section layer 2	2	2015-02-01	Dry Sift	10	79	ליואל-חפורית מוזרה?						1	1	1mm-subsample5
HLZ-48	Elusa	Bar-Oz, Gini and Weissbrod	Daniel Fuks	2016-2018	A1	1b	section layer 2	2	2015-02-01	Dry Sift	10	80				culm node			1	1	1mm-subsample5
HLZ-48	Elusa	Bar-Oz, Gini and Weissbrod	Daniel Fuks	2016-2018	A1	1b	section layer 2	2	2015-02-01	Dry Sift	10	81	דמוי - אשל	cf. Tamarix aphylla					1	1	1mm-subsample5
HLZ-48	Elusa	Bar-Oz, Gini and Weissbrod	Daniel Fuks	2016-2018	A1	1b	section layer 2	2	2015-02-01	Dry Sift	10	82	מתנן שעיר	Thymelaea hirsuta	אגוזית	nutlet	מתננים	Thymelaceae	10	10	1mm-subsample5
HLZ-48	Elusa	Bar-Oz, Gini and Weissbrod	Daniel Fuks	2016-2018	A1	1b	section layer 2	2	2015-02-01	Dry Sift	10	83	מתנן שעיר	cf	גביע	calyx	מתננים	Thymelaceae	2	2	1mm-subsample5
HLZ-48	Elusa	Bar-Oz, Gini and Weissbrod	Daniel Fuks	2016-2018	A1	1b	section layer 2	2	2015-02-01	Dry Sift	10	84	מתנן שעיר	Thymelaea hirsuta	עלה	leaf	מתננים	Thymelaceae	83	83	1mm-subsample5
HLZ-48	Elusa	Bar-Oz, Gini and Weissbrod	Daniel Fuks	2016-2018	A1	1b	section layer 2	2	2015-02-01	Dry Sift	10	85	מתנן שעיר		ניצן	bud	מתננים	Thymelaceae	8	8	1mm-subsample5				קצות ענף
HLZ-48	Elusa	Bar-Oz, Gini and Weissbrod	Daniel Fuks	2016-2018	A1	1b	section layer 2	2	2015-02-01	Dry Sift	10	86		cf. Salsoleae	זרע?				1	1	1mm-subsample5
HLZ-48	Elusa	Bar-Oz, Gini and Weissbrod	Daniel Fuks	2016-2018	A1	1b	section layer 2	2	2015-02-01	Dry Sift	10	87	ליואל								1mm-subsample5
HLZ-48	Elusa	Bar-Oz, Gini and Weissbrod	Daniel Fuks	2016-2018	A1	1b	section layer 2	2	2015-02-01	Dry Sift	10	88	בלתי-שונות								1mm-subsample5
HLZ-48	Elusa	Bar-Oz, Gini and Weissbrod	Daniel Fuks	2016-2018	A1	1b	section layer 2		2015-02-01	Dry Sift	10	89	דגני		גרגיר	grain	דגניים	Gramineae	1	1	0.5mm-subsample1
HLZ-48	Elusa	Bar-Oz, Gini and Weissbrod	Daniel Fuks	2016-2018	A1	1b	section layer 2		2015-02-01	Dry Sift	10	90	שעורה שש-טורית			rachis	דגניים	Gramineae	1	1	0.5mm-subsample1
HLZ-48	Elusa	Bar-Oz, Gini and Weissbrod	Daniel Fuks	2016-2018	A1	1b	section layer 2		2015-02-01	Dry Sift	10	91	שעורה	Hordeum		rachis	דגניים	Gramineae	1	1	0.5mm-subsample1
HLZ-48	Elusa	Bar-Oz, Gini and Weissbrod	Daniel Fuks	2016-2018	A1	1b	section layer 2		2015-02-01	Dry Sift	10	92	דגני			rachis	דגניים	Gramineae	2	2	0.5mm-subsample1
HLZ-48	Elusa	Bar-Oz, Gini and Weissbrod	Daniel Fuks	2016-2018	A1	1b	section layer 2		2015-02-15	Dry Sift	10	93	תאנה??	Ficus carica?	זרע?				2	2	0.5mm-subsample1
HLZ-48	Elusa	Bar-Oz, Gini and Weissbrod	Daniel Fuks	2016-2018	A1	1b	section layer 2		2015-02-15	Dry Sift	10	94	תאנה	Ficus carica	אגוזית	nutlet			9	9	0.5mm-subsample1
HLZ-48	Elusa	Bar-Oz, Gini and Weissbrod	Daniel Fuks	2016-2018	A1	1b	section layer 2		2015-02-01	Dry Sift	10	95	גפן	Vitis vinifera	שברי חרצן		גפניים	Vitaceae	6	6	0.5mm-subsample1
HLZ-48	Elusa	Bar-Oz, Gini and Weissbrod	Daniel Fuks	2016-2018	A1	1b	section layer 2		2015-02-01	Dry Sift	10	96	מתנן שעיר	Thymelaea hirsuta	עלה	leaf	מתננים	Thymelaceae	10	10s	0.5mm-subsample1
HLZ-48	Elusa	Bar-Oz, Gini and Weissbrod	Daniel Fuks	2016-2018	A1	1b	section layer 2		2015-02-01	Dry Sift	10	97	מתנן שעיר	Thymelaea hirsuta	גביע פורה		מתננים	Thymelaceae	1	1	0.5mm-subsample1
HLZ-48	Elusa	Bar-Oz, Gini and Weissbrod	Daniel Fuks	2016-2018	A1	1b	section layer 2		2015-02-01	Dry Sift	10	98	מתנן שעיר	Thymelaea hirsuta	ניצן	bud	מתננים	Thymelaceae	8	8	0.5mm-subsample1				קצוץ ענף
HLZ-48	Elusa	Bar-Oz, Gini and Weissbrod	Daniel Fuks	2016-2018	A1	1b	section layer 2		2015-02-01	Dry Sift	10	99	אהל מצוי	Mesembryanthemum nodiflorum	זרע?	seed	חיעדיים	Aizoaceae	1	1	0.5mm-subsample1
HLZ-48	Elusa	Bar-Oz, Gini and Weissbrod	Daniel Fuks	2016-2018	A1	1b	section layer 2		2015-02-01	Dry Sift	10	100	בלתי						1	1	0.5mm-subsample1				לחבר בהמשך
HLZ-48	Elusa	Bar-Oz, Gini and Weissbrod	Daniel Fuks	2016-2018	A1	1b	section layer 2		2015-02-01	Dry Sift	10	101	אשל הפרקים	Tamarix aphylla		segment			24	24	0.5mm-subsample1
HLZ-48	Elusa	Bar-Oz, Gini and Weissbrod	Daniel Fuks	2016-2018	A1	1b	section layer 2		2015-02-01	Dry Sift	10	102	חרק								0.5mm-subsample1				מפוחם
HLZ-48	Elusa	Bar-Oz, Gini and Weissbrod	Daniel Fuks	2016-2018	A1	1b	section layer 2		2015-02-01	Dry Sift	10	103	ליואל						3	3	0.5mm-subsample1
HLZ-48	Elusa	Bar-Oz, Gini and Weissbrod	Daniel Fuks	2016-2018	A1	1b	section layer 2		2015-02-01	Dry Sift	10	104		small plant??							0.5mm-subsample1
HLZ-48	Elusa	Bar-Oz, Gini and Weissbrod	Daniel Fuks	2016-2018	A1	1b	section layer 2		2015-02-15	Dry Sift	10	105	בלתי								0.5mm-subsample2				להגדרה בהמשך
HLZ-48	Elusa	Bar-Oz, Gini and Weissbrod	Daniel Fuks	2016-2018	A1	1b	section layer 2		2015-02-15	Dry Sift	10	106	שברי מלען		שברי מלען						0.5mm-subsample2
HLZ-48	Elusa	Bar-Oz, Gini and Weissbrod	Daniel Fuks	2016-2018	A1	1b	section layer 2		2015-02-01	Dry Sift	10	107	מתנן		עלה		מתננים	Thymelaceae	85	85	0.5mm-subsample2
HLZ-48	Elusa	Bar-Oz, Gini and Weissbrod	Daniel Fuks	2016-2018	A1	1b	section layer 2		2015-02-01	Dry Sift	10	108	דמוי - אשליל						1	1	0.5mm-subsample2
HLZ-48	Elusa	Bar-Oz, Gini and Weissbrod	Daniel Fuks	2016-2018	A1	1b	section layer 2		2015-02-01	Dry Sift	10	109	מתנן שעיר	Thymelaea hirsuta	אגוזית	nutlet	מתננים	Thymelaceae	1	1	0.5mm-subsample2
HLZ-48	Elusa	Bar-Oz, Gini and Weissbrod	Daniel Fuks	2016-2018	A1	1b	section layer 2		2015-02-01	Dry Sift	10	110	cf. שבר לבן						1	1	0.5mm-subsample2
HLZ-48	Elusa	Bar-Oz, Gini and Weissbrod	Daniel Fuks	2016-2018	A1	1b	section layer 2		2015-02-01	Dry Sift	10	111	אהל מצוי	Mesembryanthemum nodiflorum	זרע?	seed	חיעדיים	Aizoaceae	1	1	0.5mm-subsample2
HLZ-48	Elusa	Bar-Oz, Gini and Weissbrod	Daniel Fuks	2016-2018	A1	1b	section layer 2		2015-02-01	Dry Sift	10	112	תאנה/שקמה		אגוזית	nutlet			9	9	0.5mm-subsample2
HLZ-48	Elusa	Bar-Oz, Gini and Weissbrod	Daniel Fuks	2016-2018	A1	1b	section layer 2		2015-02-01	Dry Sift	10	113	ליואל						3	3	0.5mm-subsample2
HLZ-48	Elusa	Bar-Oz, Gini and Weissbrod	Daniel Fuks	2016-2018	A1	1b	section layer 2		2015-02-01	Dry Sift	10	114	אשל/Salsoleae		זרע?				2	2	0.5mm-subsample2
HLZ-48	Elusa	Bar-Oz, Gini and Weissbrod	Daniel Fuks	2016-2018	A1	1b	section layer 2		2015-02-01	Dry Sift	10	115	ליואל						6	6	0.5mm-subsample2
HLZ-48	Elusa	Bar-Oz, Gini and Weissbrod	Daniel Fuks	2016-2018	A1	1b	section layer 2		2015-02-01	Dry Sift	10	116	ליואל						1	1	0.5mm-subsample2
HLZ-48	Elusa	Bar-Oz, Gini and Weissbrod	Daniel Fuks	2016-2018	A1	1b	section layer 2		2015-02-01	Dry Sift	10	117	?						3	3	0.5mm-subsample2
HLZ-48	Elusa	Bar-Oz, Gini and Weissbrod	Daniel Fuks	2016-2018	A1	1b	section layer 2		2015-02-01	Dry Sift	10	118	בלתי - שונות								0.5mm-subsample2
HLZ-48	Elusa	Bar-Oz, Gini and Weissbrod	Daniel Fuks	2016-2018	A1	1b	section layer 2		2015-02-01	Dry Sift	10	119	תאנה	Ficus carica	אגוזית	nutlet			3	3	0.5mm-subsample3
HLZ-48	Elusa	Bar-Oz, Gini and Weissbrod	Daniel Fuks	2016-2018	A1	1b	section layer 2		2015-02-01	Dry Sift	10	120	אהל מצוי	Mesembryanthemum nodiflorum	זרע?	seed	חיעדיים	Aizoaceae	5	5	0.5mm-subsample3
HLZ-48	Elusa	Bar-Oz, Gini and Weissbrod	Daniel Fuks	2016-2018	A1	1b	section layer 2		2015-02-01	Dry Sift	10	121	גפן	Vitis vinifera	שברי חרצן		גפניים	Vitaceae			0.5mm-subsample3
HLZ-48	Elusa	Bar-Oz, Gini and Weissbrod	Daniel Fuks	2016-2018	A1	1b	section layer 2		2015-02-15	Dry Sift	10	122	שברי מלען		שברי מלען						0.5mm-subsample3
HLZ-48	Elusa	Bar-Oz, Gini and Weissbrod	Daniel Fuks	2016-2018	A1	1b	section layer 2		2015-02-15	Dry Sift	10	123	בלתי								0.5mm-subsample3				להמשך
HLZ-48	Elusa	Bar-Oz, Gini and Weissbrod	Daniel Fuks	2016-2018	A1	1b	section layer 2		2015-02-01	Dry Sift	10	124	בלתי-שונות								0.5mm-subsample3	0.5mm-subsample8	0.5mm-subsample9
HLZ-48	Elusa	Bar-Oz, Gini and Weissbrod	Daniel Fuks	2016-2018	A1	1b	section layer 2		2015-02-01	Dry Sift	10	125	מתנן שעיר		עלה		מתנניים		60	60	0.5mm-subsample3
HLZ-48	Elusa	Bar-Oz, Gini and Weissbrod	Daniel Fuks	2016-2018	A1	1b	section layer 2		2015-02-01	Dry Sift	10	126	מתנן שעיר		ניצן		מתנניים		3	3	0.5mm-subsample3
HLZ-48	Elusa	Bar-Oz, Gini and Weissbrod	Daniel Fuks	2016-2018	A1	1b	section layer 2		2015-02-01	Dry Sift	10	127	מתנן שעיר		גביע		מתנניים		4	4	0.5mm-subsample3
HLZ-48	Elusa	Bar-Oz, Gini and Weissbrod	Daniel Fuks	2016-2018	A1	1b	section layer 2		2015-02-01	Dry Sift	10	128	מתנן שעיר??		עלים				6	6	0.5mm-subsample3
HLZ-48	Elusa	Bar-Oz, Gini and Weissbrod	Daniel Fuks	2016-2018	A1	1b	section layer 2		2015-02-01	Dry Sift	10	129	אשל הפרקים	cf.	זרע?				1	1	0.5mm-subsample3
HLZ-48	Elusa	Bar-Oz, Gini and Weissbrod	Daniel Fuks	2016-2018	A1	1b	section layer 2		2015-02-01	Dry Sift	10	130	ליואל						3	3	0.5mm-subsample3
HLZ-48	Elusa	Bar-Oz, Gini and Weissbrod	Daniel Fuks	2016-2018	A1	1b	section layer 2		2015-02-01	Dry Sift	10	131	בלתי		עלים				17	17	0.5mm-subsample3
HLZ-48	Elusa	Bar-Oz, Gini and Weissbrod	Daniel Fuks	2016-2018	A1	1b	section layer 2		2015-02-01	Dry Sift	10	132	בלתי - שונות								0.5mm-subsample4				להמשך
HLZ-48	Elusa	Bar-Oz, Gini and Weissbrod	Daniel Fuks	2016-2018	A1	1b	section layer 2		2015-02-01	Dry Sift	10	133	גפן	Vitis vinifera	שברי חרצן		גפניים				0.5mm-subsample4
HLZ-48	Elusa	Bar-Oz, Gini and Weissbrod	Daniel Fuks	2016-2018	A1	1b	section layer 2		2015-02-01	Dry Sift	10	134	תאנה?	Ficus carica	אגוזית	nutlet			1	1	0.5mm-subsample4
HLZ-48	Elusa	Bar-Oz, Gini and Weissbrod	Daniel Fuks	2016-2018	A1	1b	section layer 2		2015-02-01	Dry Sift	10	135	שברי מלען		שברי מלען				1	1	0.5mm-subsample4
HLZ-48	Elusa	Bar-Oz, Gini and Weissbrod	Daniel Fuks	2016-2018	A1	1b	section layer 2		2015-02-01	Dry Sift	10	136	מורכבים		זרעון				1	1	0.5mm-subsample4
HLZ-48	Elusa	Bar-Oz, Gini and Weissbrod	Daniel Fuks	2016-2018	A1	1b	section layer 2		2015-02-01	Dry Sift	10	137	ליואל						3	3	0.5mm-subsample4
HLZ-48	Elusa	Bar-Oz, Gini and Weissbrod	Daniel Fuks	2016-2018	A1	1b	section layer 2		2015-02-01	Dry Sift	10	138	אהל מצוי	Mesembryanthemum nodiflorum	זרע?	seed	חיעדיים	Aizoaceae			0.5mm-subsample4
HLZ-48	Elusa	Bar-Oz, Gini and Weissbrod	Daniel Fuks	2016-2018	A1	1b	section layer 2		2015-02-01	Dry Sift	10	139	מתנן שעיר		ניצן				2	2	0.5mm-subsample4				קצות עלה
HLZ-48	Elusa	Bar-Oz, Gini and Weissbrod	Daniel Fuks	2016-2018	A1	1b	section layer 2		2015-02-01	Dry Sift	10	140	מתנן שעיר		עלה				25	25	0.5mm-subsample4
HLZ-48	Elusa	Bar-Oz, Gini and Weissbrod	Daniel Fuks	2016-2018	A1	1b	section layer 2		2015-02-01	Dry Sift	10	141	אשל הפרקים		זרע?				5	5	0.5mm-subsample4
HLZ-48	Elusa	Bar-Oz, Gini and Weissbrod	Daniel Fuks	2016-2018	A1	1b	section layer 2		2015-02-01	Dry Sift	10	142	שברי מלען וגלומה		שברי מלען וגלומה						0.5mm-subsample5
HLZ-48	Elusa	Bar-Oz, Gini and Weissbrod	Daniel Fuks	2016-2018	A1	1b	section layer 2		2015-02-01	Dry Sift	10	143	אהל מצוי	Mesembryanthemum nodiflorum	זרע?	seed	חיעדיים	Aizoaceae	2	2	0.5mm-subsample5
HLZ-48	Elusa	Bar-Oz, Gini and Weissbrod	Daniel Fuks	2016-2018	A1	1b	section layer 2		2015-02-01	Dry Sift	10	144	אשל הפרקים	Tamarix aphylla	זרע?				4	4	0.5mm-subsample5
HLZ-48	Elusa	Bar-Oz, Gini and Weissbrod	Daniel Fuks	2016-2018	A1	1b	section layer 2		2015-02-01	Dry Sift	10	145	מתנן שעיר	Thymelaea hirsuta	עלה	leaf	מתננים	Thymelaceae	50	50	0.5mm-subsample5
HLZ-48	Elusa	Bar-Oz, Gini and Weissbrod	Daniel Fuks	2016-2018	A1	1b	section layer 2		2015-02-01	Dry Sift	10	146	בלתי - שונות								0.5mm-subsample5
HLZ-48	Elusa	Bar-Oz, Gini and Weissbrod	Daniel Fuks	2016-2018	A1	1b	section layer 2		2015-02-01	Dry Sift	10	147	גפן	Vitis vinifera	שברי חרצן		גפניים	Vitaceae			0.5mm-subsample5
HLZ-48	Elusa	Bar-Oz, Gini and Weissbrod	Daniel Fuks	2016-2018	A1	1b	section layer 2		2015-02-01	Dry Sift	10	148	בלתי - להמשך								0.5mm-subsample5
HLZ-48	Elusa	Bar-Oz, Gini and Weissbrod	Daniel Fuks	2016-2018	A1	1b	section layer 2		2015-02-01	Dry Sift	10	149	תאנה?	Ficus carica?	זרע?				1	1	0.5mm-subsample5
HLZ-48	Elusa	Bar-Oz, Gini and Weissbrod	Daniel Fuks	2016-2018	A1	1b	section layer 2		2015-02-01	Dry Sift	10	150	תאנה	Ficus carica	אגוזית	nutlet			3	3	0.5mm-subsample5
HLZ-48	Elusa	Bar-Oz, Gini and Weissbrod	Daniel Fuks	2016-2018	A1	1b	section layer 2		2015-02-01	Dry Sift	10	151	ליואל						3	3	0.5mm-subsample5
HLZ-48	Elusa	Bar-Oz, Gini and Weissbrod	Daniel Fuks	2016-2018	A1	1b	section layer 2		2015-02-01	Dry Sift	10	152	בן-שלח	Reboudia pinnata	מקור תרמיל		מצליבים	Brassicaceae	1	1	0.5mm-subsample5
HLZ-48	Elusa	Bar-Oz, Gini and Weissbrod	Daniel Fuks	2016-2018	A1	1b	section layer 2		2015-02-01	Dry Sift	10	153	מתנן??		גביע		מתנניים		4	4	0.5mm-subsample5
HLZ-48	Elusa	Bar-Oz, Gini and Weissbrod	Daniel Fuks	2016-2018	A1	1b	section layer 2		2015-02-01	Dry Sift	10	154	מתנן שעיר	Thymelaea hirsuta	ניצן	bud	מתננים	Thymelaceae	6	6	0.5mm-subsample5				קצה ענף
HLZ-48	Elusa	Bar-Oz, Gini and Weissbrod	Daniel Fuks	2016-2018	A1	1b	section layer 2		2015-02-01	Dry Sift	10	155	שברי מלען		שברי מלען				5	5	0.3mm-subsample1
HLZ-48	Elusa	Bar-Oz, Gini and Weissbrod	Daniel Fuks	2016-2018	A1	1b	section layer 2		2015-02-01	Dry Sift	10	156	מתנן שעיר	Thymelaea hirsuta	ניצן/גביע	bud/	מתננים	Thymelaceae	1	1	0.3mm-subsample1
HLZ-48	Elusa	Bar-Oz, Gini and Weissbrod	Daniel Fuks	2016-2018	A1	1b	section layer 2		2015-02-01	Dry Sift	10	157	בלתי - שונות								0.3mm-subsample1
HLZ-48	Elusa	Bar-Oz, Gini and Weissbrod	Daniel Fuks	2016-2018	A1	1b	section layer 2		2015-02-01	Dry Sift	10	158	מתנן שעיר	Thymelaea hirsuta	עלה	leaf	מתננים	Thymelaceae	3	3	0.3mm-subsample2
HLZ-48	Elusa	Bar-Oz, Gini and Weissbrod	Daniel Fuks	2016-2018	A1	1b	section layer 2		2015-02-01	Dry Sift	10	159	אשל הפרקים	Tamarix aphylla	זרע?				4	4	0.3mm-subsample2
HLZ-48	Elusa	Bar-Oz, Gini and Weissbrod	Daniel Fuks	2016-2018	A1	1b	section layer 2		2015-02-01	Dry Sift	10	160	שברי מלען		שברי מלען				1	1	0.3mm-subsample2
HLZ-48	Elusa	Bar-Oz, Gini and Weissbrod	Daniel Fuks	2016-2018	A1	1b	section layer 2		2015-02-15	Dry Sift	10	161	בלתי - שונות								0.3mm-subsample2
HLZ-48	Elusa	Bar-Oz, Gini and Weissbrod	Daniel Fuks	2016-2018	A1	1b	section layer 2		2015-02-15	Dry Sift	10	162	מתנן שעיר	Thymelaea hirsuta	עלה	leaf	מתננים	Thymelaceae	9	9	0.3mm-subsample3
HLZ-48	Elusa	Bar-Oz, Gini and Weissbrod	Daniel Fuks	2016-2018	A1	1b	section layer 2		2015-02-01	Dry Sift	10	163	מתנן שעיר	Thymelaea hirsuta	ניצן/גביע	bud/	מתננים	Thymelaceae	1	1	0.3mm-subsample3
HLZ-48	Elusa	Bar-Oz, Gini and Weissbrod	Daniel Fuks	2016-2018	A1	1b	section layer 2		2015-02-01	Dry Sift	10	164	ליואל						5	5	0.3mm-subsample3
HLZ-48	Elusa	Bar-Oz, Gini and Weissbrod	Daniel Fuks	2016-2018	A1	1b	section layer 2		2015-02-01	Dry Sift	10	165	בלתי - שונות								0.3mm-subsample3
HLZ-48	Elusa	Bar-Oz, Gini and Weissbrod	Daniel Fuks	2016-2018	A1	1b	section layer 2		2015-02-01	Dry Sift	10	166	מתנן שעיר	Thymelaea hirsuta	ניצן/גביע	bud/	מתננים	Thymelaceae	2	2	0.3mm-subsample4
HLZ-48	Elusa	Bar-Oz, Gini and Weissbrod	Daniel Fuks	2016-2018	A1	1b	section layer 2		2015-02-01	Dry Sift	10	167	מתנן שעיר	Thymelaea hirsuta	עלה	leaf	מתננים	Thymelaceae	4	4	0.3mm-subsample4
HLZ-48	Elusa	Bar-Oz, Gini and Weissbrod	Daniel Fuks	2016-2018	A1	1b	section layer 2		2015-02-01	Dry Sift	10	168	שברי מלען		שברי מלען						0.3mm-subsample4
HLZ-48	Elusa	Bar-Oz, Gini and Weissbrod	Daniel Fuks	2016-2018	A1	1b	section layer 2		2015-02-01	Dry Sift	10	169	אהל מצוי	Mesembryanthemum nodiflorum	זרע?	seed	חיעדיים	Aizoaceae	1	1	0.3mm-subsample4
HLZ-48	Elusa	Bar-Oz, Gini and Weissbrod	Daniel Fuks	2016-2018	A1	1b	section layer 2		2015-02-01	Dry Sift	10	170	בלתי - שונות								0.3mm-subsample4
HLZ-48	Elusa	Bar-Oz, Gini and Weissbrod	Daniel Fuks	2016-2018	A1	1b	section layer 2		2015-02-01	Dry Sift	10	171	שברי מלען		שברי מלען						0.3mm-subsample5
HLZ-48	Elusa	Bar-Oz, Gini and Weissbrod	Daniel Fuks	2016-2018	A1	1b	section layer 2		2015-02-01	Dry Sift	10	172	מתנן שעיר	Thymelaea hirsuta	ניצן/גביע	bud/	מתננים	Thymelaceae	3	3	0.3mm-subsample5
HLZ-48	Elusa	Bar-Oz, Gini and Weissbrod	Daniel Fuks	2016-2018	A1	1b	section layer 2		2015-02-15	Dry Sift	10	173	מתנן שעיר	Thymelaea hirsuta	עלה	leaf	מתננים	Thymelaceae	4	4	0.3mm-subsample5
HLZ-48	Elusa	Bar-Oz, Gini and Weissbrod	Daniel Fuks	2016-2018	A1	1b	section layer 2		2015-02-15	Dry Sift	10	174	בלתי - שונות								0.3mm-subsample5
HLZ-49	Elusa	Bar-Oz, Gini and Weissbrod	Daniel Fuks	2016-2018	A1	1b	section layer 3	3	2015-02-01	Dry Sift	3	1	שעורה	Hordeum vulgare	גרגיר	grain	דגניים	Gramineae	6	6	2
HLZ-49	Elusa	Bar-Oz, Gini and Weissbrod	Daniel Fuks	2016-2018	A1	1b	section layer 3		2015-02-01	Dry Sift	3	2	גפן	Vitis vinifera	חרצן	pip	גפניים	Vitaceae	2	2	2
HLZ-49	Elusa	Bar-Oz, Gini and Weissbrod	Daniel Fuks	2016-2018	A1	1b	section layer 3		2015-02-01	Dry Sift	3	3	זון?						1	1	2
HLZ-49	Elusa	Bar-Oz, Gini and Weissbrod	Daniel Fuks	2016-2018	A1	1b	section layer 3		2015-02-01	Dry Sift	3	4			פרקי דגן	culm nodes	דגניים	Gramineae	5	5	2				2שורשים
HLZ-49	Elusa	Bar-Oz, Gini and Weissbrod	Daniel Fuks	2016-2018	A1	1b	section layer 3		2015-02-01	Dry Sift	3	5	קטנית?								2
HLZ-49	Elusa	Bar-Oz, Gini and Weissbrod	Daniel Fuks	2016-2018	A1	1b	section layer 3		2015-02-01	Dry Sift	3	6	בלתי-שונות								2
HLZ-5	Elusa	Bar-Oz, Gini and Weissbrod	Daniel Fuks, Yael Slasky	2015	A1	1	1/03a	13	2015-02-01	Bucket Floated	4	1	שעורה	Hordeum	גרגיר	grain	דגניים	Gramineae	1	1			כן
HLZ-5	Elusa	Bar-Oz, Gini and Weissbrod	Daniel Fuks, Yael Slasky	2015	A1	1	1/03a	13	2015-02-01	Bucket Floated		2	חיטה/שעורה	Hordeum cf. Triticum	גרגיר	grain	דגניים	Gramineae	3	3		לא	כן		מזכיר שעורה אך שרוף מדיי כדיה להכריע
HLZ-5	Elusa	Bar-Oz, Gini and Weissbrod	Daniel Fuks, Yael Slasky	2015	A1	1	1/03a	13	2015-02-01	Bucket Floated		3	דגני		גרגיר	grain	דגניים	Gramineae	7	7		לא	כן	7 שברים
HLZ-5	Elusa	Bar-Oz, Gini and Weissbrod	Daniel Fuks, Yael Slasky	2015	A1	1	1/03a	13	2015-02-01	Bucket Floated		4	שעורה	Hordeum	עובר	grain	דגניים	Gramineae	1	1			כן
HLZ-5	Elusa	Bar-Oz, Gini and Weissbrod	Daniel Fuks, Yael Slasky	2015	A1	1	1/03a	13	2015-02-01	Bucket Floated		5	פיקוס התאנה	Ficus carica	אגוזית	nutlet	תותיים	Moraceae	6	6		לא	כן	6	לבדוק את הצ'ופצ'יק
HLZ-5	Elusa	Bar-Oz, Gini and Weissbrod	Daniel Fuks, Yael Slasky	2015	A1	1	1/03a	13	2015-02-01	Bucket Floated		6	חלמית	Malva	זרע	seed	חלמיתיים	Malvaceae	5	5			לא	רצנטי??	2פרודות , 2 שדופות ו-1 זרע
HLZ-5	Elusa	Bar-Oz, Gini and Weissbrod	Daniel Fuks, Yael Slasky	2015	A1	1	1/03a	13	2015-02-01	Bucket Floated		7	כף אווז	Chenopodium	זרע	seed	סלקיים	Chenopodiaceae	1	1		לא	?	רצנטי??
HLZ-5	Elusa	Bar-Oz, Gini and Weissbrod	Daniel Fuks, Yael Slasky	2015	A1	1	1/03a	13	2015-02-01	Bucket Floated		8	חיעד ספרדי	Aizoon hispanicum	זרע	seed	חיעדיים	Aizoaceae	1	1		כן	כן	לא
HLZ-5	Elusa	Bar-Oz, Gini and Weissbrod	Daniel Fuks, Yael Slasky	2015	A1	1	1/03a	13	2015-02-01	Bucket Floated		9	מתנן שעיר	Thymelaea hirsuta	פרי	fruitlet	מתנניים	Thymelaceae	2	2			כן	לא
HLZ-5	Elusa	Bar-Oz, Gini and Weissbrod	Daniel Fuks, Yael Slasky	2015	A1	1	1/03a	13	2015-02-15	Bucket Floated		10	מתנן שעיר	Thymelaea hirsuta	עלים	leaves	מתנניים	Thymelaceae	2	2		לא
HLZ-5	Elusa	Bar-Oz, Gini and Weissbrod	Daniel Fuks, Yael Slasky	2015	A1	1	1/03a	13	2015-02-15	Bucket Floated		11	אמיך קוצני	Emex spinosa	פרי	fruit	ארכוביתיים	Polygonaceae	1	1							יואל זיהה. לבדוק שוב את הקוצני
HLZ-5	Elusa	Bar-Oz, Gini and Weissbrod	Daniel Fuks, Yael Slasky	2015	A1	1	1/03a	13	2015-02-01	Bucket Floated		12	מררית	Picris	זרע				1	1		כן					יואל זיהה
HLZ-5	Elusa	Bar-Oz, Gini and Weissbrod	Daniel Fuks, Yael Slasky	2015	A1	1	1/03a	13	2015-02-01	Bucket Floated		13	בן-שלח	Reboudia pinnata	חצי תרמיל קצה	half of pod end	מצליבים	Brassicaceae	1	1		כן					לא דמומית כי הפסים שלו ישרות. גם שטוח מבפנים לעומת דמומית
HLZ-5	Elusa	Bar-Oz, Gini and Weissbrod	Daniel Fuks, Yael Slasky	2015	A1	1	1/03a	13	2015-02-01	Bucket Floated		14	ארנבית שרועה	Arnebia decumbens	זרע		זיפניים		1	1		כן			בדוק-עמ' 62 במחברת		לבדוק שזה לא עכנאי
HLZ-5	Elusa	Bar-Oz, Gini and Weissbrod	Daniel Fuks, Yael Slasky	2015	A1	1	1/03a	13	2015-02-01	Bucket Floated		15	חלמית?	Malva?	פרי מפרדת										חלמיתיים? זוגניים?		לא ברור
HLZ-5	Elusa	Bar-Oz, Gini and Weissbrod	Daniel Fuks, Yael Slasky	2015	A1	1	1/03a	13	2015-02-01	Bucket Floated		16	מתנן שעיר???	Thymelaea hirsuta???	פרח				4	4							אחד כן, 2 דומים ואחד לא ברור
HLZ-5	Elusa	Bar-Oz, Gini and Weissbrod	Daniel Fuks, Yael Slasky	2015	A1	1	1/03a	13	2015-02-01	Bucket Floated		17	בלתי מזוהה						1	1							מזכיר של ענבים אך קשה להחליט
HLZ-5	Elusa	Bar-Oz, Gini and Weissbrod	Daniel Fuks, Yael Slasky	2015	A1	1	1/03a	13	2015-02-01	Bucket Floated		18	בלתי מזוהה		פרחים עם צלקת				3	3					השווה 5-24		יפה
HLZ-5	Elusa	Bar-Oz, Gini and Weissbrod	Daniel Fuks, Yael Slasky	2015	A1	1	1/03a	13	2015-02-01	Bucket Floated		19	בלתי מזוהה						1	1							דמוי בסיה השוו לעיל
HLZ-5	Elusa	Bar-Oz, Gini and Weissbrod	Daniel Fuks, Yael Slasky	2015	A1	1	1/03a	13	2015-02-01	Bucket Floated		20	בלתי מזוהה						1	1							אולי חלק פנימי של גלעין?
HLZ-5	Elusa	Bar-Oz, Gini and Weissbrod	Daniel Fuks, Yael Slasky	2015	A1	1	1/03a	13	2015-02-01	Bucket Floated		21	בלתי מזוהה						10	10					שונות		לא להתעסק עכשיו. גם לא כל הקודמים
HLZ-5	Elusa	Bar-Oz, Gini and Weissbrod	Daniel Fuks, Yael Slasky	2015	A1	1	1/03a	13	2015-02-01	Bucket Floated		22	דגני		עוקץ שיבולית רצנטי				1	1				רצנטי			רצנטי
HLZ-5	Elusa	Bar-Oz, Gini and Weissbrod	Daniel Fuks, Yael Slasky	2015	A1	1	1/03a	13	2015-02-01	Bucket Floated		23	גבעולים						25	25				חלק
HLZ-5	Elusa	Bar-Oz, Gini and Weissbrod	Daniel Fuks, Yael Slasky	2015	A1	1	1/03a	13	2015-02-01	Bucket Floated		24	בלתי מזוהה		פרח עם צלקת??				1	1					השווה ל5-18
HLZ-5	Elusa	Bar-Oz, Gini and Weissbrod	Daniel Fuks, Yael Slasky	2015	A1	1	1/03a	13	2015-02-01	Bucket Floated		25	בלתי מזוהה		עלים	leaves			18	18
HLZ-5	Elusa	Bar-Oz, Gini and Weissbrod	Daniel Fuks, Yael Slasky	2015	A1	1	1/03a	13	2015-02-01	Bucket Floated		26	בלתי מזוהה						20	20			לא
HLZ-5	Elusa	Bar-Oz, Gini and Weissbrod	Daniel Fuks, Yael Slasky	2015	A1	1	1/03a	13	2015-02-01	Bucket Floated		27	בלתי מזוהה						26	26			לא		ללא צורה
HLZ-5	Elusa	Bar-Oz, Gini and Weissbrod	Daniel Fuks, Yael Slasky	2015	A1	1	1/03a	13	2015-02-01	Bucket Floated		28	בלתי מזוהה						85	כ-80-90			כן
HLZ-5	Elusa	Bar-Oz, Gini and Weissbrod	Daniel Fuks, Yael Slasky	2015	A1	1	1/03a	13	2015-02-01	Bucket Floated		29	אהל מצוי	Mesembryanthemum nodiflorum	זרע	seed	חיעדיים	Aizoaceae	100	כ-100			לא		הערכה גסה של כמות
HLZ-5	Elusa	Bar-Oz, Gini and Weissbrod	Daniel Fuks, Yael Slasky	2015	A1	1	1/03a	13	2015-02-01	Bucket Floated		30	דגני			grain	דגניים	Gramineae	3	3			כן
HLZ-5	Elusa	Bar-Oz, Gini and Weissbrod	Daniel Fuks, Yael Slasky	2015	A1	1	1/03a	13	2015-02-01	Bucket Floated		31	דגני		גלומות				2	2			כן		השווה 1-34
HLZ-5	Elusa	Bar-Oz, Gini and Weissbrod	Daniel Fuks, Yael Slasky	2015	A1	1	1/03a	13	2015-02-01	Bucket Floated		32	חיעד ספרדי	Aizoon hispanicum	זרע	seed	חיעדיים	Aizoaceae	1	1			כן
HLZ-5	Elusa	Bar-Oz, Gini and Weissbrod	Daniel Fuks, Yael Slasky	2015	A1	1	1/03a	13	2015-02-01	Bucket Floated		33	מתכת						3	3
HLZ-5	Elusa	Bar-Oz, Gini and Weissbrod	Daniel Fuks, Yael Slasky	2015	A1	1	1/03a	13	2015-02-01	Bucket Floated		34	חרק						0	הרבה			לא	כן
HLZ-50	Elusa	Bar-Oz, Gini and Weissbrod	Daniel Fuks	2016-2018	A1	1b	section layer 4	4a	2015-02-01	Dry Sift	3	1	שעורה	Hordeum vulgare	גרגיר	grain	דגניים	Gramineae	26	26	2
HLZ-50	Elusa	Bar-Oz, Gini and Weissbrod	Daniel Fuks	2016-2018	A1	1b	section layer 4		2015-02-01	Dry Sift	3	2	חיטה/שעורה	Hordeum cf. Triticum	גרגיר	grain	דגניים	Gramineae	4	4	2
HLZ-50	Elusa	Bar-Oz, Gini and Weissbrod	Daniel Fuks	2016-2018	A1	1b	section layer 4		2015-02-01	Dry Sift	3	3	גפן	Vitis vinifera	חרצן	pip	גפניים	Vitaceae	7	7	2
HLZ-50	Elusa	Bar-Oz, Gini and Weissbrod	Daniel Fuks	2016-2018	A1	1b	section layer 4		2015-02-01	Dry Sift	3	4	גפן	Vitis vinifera	עוקץ	pedicel	גפניים	Vitaceae	4	4	2
HLZ-50	Elusa	Bar-Oz, Gini and Weissbrod	Daniel Fuks	2016-2018	A1	1b	section layer 4		2015-02-01	Dry Sift	3	5	גפן	Vitis vinifera	קליפה	skin	גפניים	Vitaceae			2
HLZ-50	Elusa	Bar-Oz, Gini and Weissbrod	Daniel Fuks	2016-2018	A1	1b	section layer 4		2015-02-01	Dry Sift	3	6			פרקי דגן	culm nodes	דגניים	Gramineae	22	22	2				3שורשים
HLZ-50	Elusa	Bar-Oz, Gini and Weissbrod	Daniel Fuks	2016-2018	A1	1b	section layer 4		2015-02-01	Dry Sift	3	7	עדשה תרבותית	Lens culinaris	זרע	seed	פרפרניים	Fabaceae	1	1	2
HLZ-50	Elusa	Bar-Oz, Gini and Weissbrod	Daniel Fuks	2016-2018	A1	1b	section layer 4		2015-02-01	Dry Sift	3	8	בקיים	Vicieae	זרע	seed	פרפרניים	Fabaceae	1	1	2
HLZ-50	Elusa	Bar-Oz, Gini and Weissbrod	Daniel Fuks	2016-2018	A1	1b	section layer 4		2015-02-01	Dry Sift	3	9	סלקי פרקי	Salsoleae					1	1	2
HLZ-50	Elusa	Bar-Oz, Gini and Weissbrod	Daniel Fuks	2016-2018	A1	1b	section layer 4		2015-02-01	Dry Sift	3	10	דבקה? שושני?						1	1	2
HLZ-50	Elusa	Bar-Oz, Gini and Weissbrod	Daniel Fuks	2016-2018	A1	1b	section layer 4		2015-02-01	Dry Sift	3	11			שברי גרגיר	grain fragments	דגניים	Gramineae			2
HLZ-50	Elusa	Bar-Oz, Gini and Weissbrod	Daniel Fuks	2016-2018	A1	1b	section layer 4		2015-02-01	Dry Sift	3	12	גלל		שברים						2
HLZ-50	Elusa	Bar-Oz, Gini and Weissbrod	Daniel Fuks	2016-2018	A1	1b	section layer 4		2015-02-01	Dry Sift	3	13	בלתי-שונות								2
HLZ-51	Elusa	Bar-Oz, Gini and Weissbrod	Daniel Fuks	2016-2018	A1	1b	section layer 4	4b	2015-02-01	Dry Sift	3	1	שעורה	Hordeum vulgare	גרגיר	grain	דגניים	Gramineae	35	35	2
HLZ-51	Elusa	Bar-Oz, Gini and Weissbrod	Daniel Fuks	2016-2018	A1	1b	section layer 4		2015-02-15	Dry Sift	3	2	חיטה	Triticum	גרגיר	grain	דגניים	Gramineae	1	1	2
HLZ-51	Elusa	Bar-Oz, Gini and Weissbrod	Daniel Fuks	2016-2018	A1	1b	section layer 4		2015-02-15	Dry Sift	3	3	חיטה/שעורה	Hordeum cf. Triticum	גרגיר	grain	דגניים	Gramineae	6	6	2
HLZ-51	Elusa	Bar-Oz, Gini and Weissbrod	Daniel Fuks	2016-2018	A1	1b	section layer 4		2015-02-01	Dry Sift	3	4	גפן	Vitis vinifera	חרצן	pip	גפניים	Vitaceae	7	7	2
HLZ-51	Elusa	Bar-Oz, Gini and Weissbrod	Daniel Fuks	2016-2018	A1	1b	section layer 4		2015-02-01	Dry Sift	3	5	גפן	Vitis vinifera	עוקץ	pedicel	גפניים	Vitaceae	7	7	2
HLZ-51	Elusa	Bar-Oz, Gini and Weissbrod	Daniel Fuks	2016-2018	A1	1b	section layer 4		2015-02-01	Dry Sift	3	6			פרקי דגן	culm nodes	דגניים	Gramineae	29	29	2
HLZ-51	Elusa	Bar-Oz, Gini and Weissbrod	Daniel Fuks	2016-2018	A1	1b	section layer 4		2015-02-01	Dry Sift	3	7	עדשה תרבותית	Lens culinaris	זרע	seed	פרפרניים	Fabaceae	5	5	2
HLZ-51	Elusa	Bar-Oz, Gini and Weissbrod	Daniel Fuks	2016-2018	A1	1b	section layer 4		2015-02-01	Dry Sift	3	8	פיקוס התאנה	Ficus carica	אגוזיות בגלל	nutlets in dung					2
HLZ-51	Elusa	Bar-Oz, Gini and Weissbrod	Daniel Fuks	2016-2018	A1	1b	section layer 4		2015-02-01	Dry Sift	3	9	אמיך קוצני	Emex spinosa					1	1	2
HLZ-51	Elusa	Bar-Oz, Gini and Weissbrod	Daniel Fuks	2016-2018	A1	1b	section layer 4		2015-02-01	Dry Sift	3	10	אספסת	Medicago sp.					1	1	2
HLZ-51	Elusa	Bar-Oz, Gini and Weissbrod	Daniel Fuks	2016-2018	A1	1b	section layer 4		2015-02-01	Dry Sift	3	11	חמד/יפרוק	Salsoleae	פרקים						2
HLZ-51	Elusa	Bar-Oz, Gini and Weissbrod	Daniel Fuks	2016-2018	A1	1b	section layer 4		2015-02-01	Dry Sift	3	12	דבקה								2
HLZ-51	Elusa	Bar-Oz, Gini and Weissbrod	Daniel Fuks	2016-2018	A1	1b	section layer 4		2015-02-01	Dry Sift	3	13	מתנן שעיר??								2
HLZ-51	Elusa	Bar-Oz, Gini and Weissbrod	Daniel Fuks	2016-2018	A1	1b	section layer 4		2015-02-15	Dry Sift	3	14	קטנית		זרע	seed	פרפרניים	Fabaceae			2
HLZ-51	Elusa	Bar-Oz, Gini and Weissbrod	Daniel Fuks	2016-2018	A1	1b	section layer 4		2015-02-15	Dry Sift	3	15	חריריים מצויים?	Bifora testiculata?							2								יותר מדיי חסר בשביל להכריע ולבנות על זה
HLZ-51	Elusa	Bar-Oz, Gini and Weissbrod	Daniel Fuks	2016-2018	A1	1b	section layer 4		2015-02-01	Dry Sift	3	16	בלתי-שונות								2
HLZ-51	Elusa	Bar-Oz, Gini and Weissbrod	Daniel Fuks	2016-2018	A1	1b	section layer 4		2015-02-01	Dry Sift	3	17	גלל		שברי גלל						2
HLZ-51	Elusa	Bar-Oz, Gini and Weissbrod	Daniel Fuks	2016-2018	A1	1b	section layer 4		2015-02-01	Dry Sift	3	18	קשקשי דג								2
HLZ-52	Elusa	Bar-Oz, Gini and Weissbrod	Daniel Fuks	2016-2018	A1	1b	section layer 5	5a	2015-02-01	Dry Sift	3	1	שעורה	Hordeum vulgare	גרגיר	grain	דגניים	Gramineae	13	13	2
HLZ-52	Elusa	Bar-Oz, Gini and Weissbrod	Daniel Fuks	2016-2018	A1	1b	section layer 5		2015-02-01	Dry Sift	3	2	חיטה/שעורה	Hordeum cf. Triticum	גרגיר	grain	דגניים	Gramineae	1	1	2
HLZ-52	Elusa	Bar-Oz, Gini and Weissbrod	Daniel Fuks	2016-2018	A1	1b	section layer 5		2015-02-01	Dry Sift	3	3	גפן	Vitis vinifera	חרצן	pip	גפניים	Vitaceae	4	4	2
HLZ-52	Elusa	Bar-Oz, Gini and Weissbrod	Daniel Fuks	2016-2018	A1	1b	section layer 5		2015-02-01	Dry Sift	3	4	גפן	Vitis vinifera	עוקץ	pedicel	גפניים	Vitaceae	1	1	2
HLZ-52	Elusa	Bar-Oz, Gini and Weissbrod	Daniel Fuks	2016-2018	A1	1b	section layer 5		2015-02-01	Dry Sift	3	5			פרקי דגן	culm nodes	דגניים	Gramineae	11	11	2
HLZ-52	Elusa	Bar-Oz, Gini and Weissbrod	Daniel Fuks	2016-2018	A1	1b	section layer 5		2015-02-01	Dry Sift	3	6	עדשה								2
HLZ-52	Elusa	Bar-Oz, Gini and Weissbrod	Daniel Fuks	2016-2018	A1	1b	section layer 5		2015-02-01	Dry Sift	3	7	בקיית הכרשינה	Vicia ervilia	פסיג	cotyledon	פרפרניים	Fabaceae			2
HLZ-52	Elusa	Bar-Oz, Gini and Weissbrod	Daniel Fuks	2016-2018	A1	1b	section layer 5		2015-02-01	Dry Sift	3	8	חמד/יפרוק	Salsoleae	פרקים						2
HLZ-52	Elusa	Bar-Oz, Gini and Weissbrod	Daniel Fuks	2016-2018	A1	1b	section layer 5		2015-02-01	Dry Sift	3	9	דבקה	Galium							2
HLZ-52	Elusa	Bar-Oz, Gini and Weissbrod	Daniel Fuks	2016-2018	A1	1b	section layer 5		2015-02-01	Dry Sift	3	10	בלתי								2
HLZ-52	Elusa	Bar-Oz, Gini and Weissbrod	Daniel Fuks	2016-2018	A1	1b	section layer 5		2015-02-01	Dry Sift	3	11	תאנה?		זרע				2	2	2
HLZ-52	Elusa	Bar-Oz, Gini and Weissbrod	Daniel Fuks	2016-2018	A1	1b	section layer 5		2015-02-01	Dry Sift	3	12	תאנה?		זרע בציפה				1	1	2
HLZ-52	Elusa	Bar-Oz, Gini and Weissbrod	Daniel Fuks	2016-2018	A1	1b	section layer 5		2015-02-15	Dry Sift	3	13	תמר??		שבר גלעין?				1	1	2								כנרה שכן אבל הרבה חסר
HLZ-52	Elusa	Bar-Oz, Gini and Weissbrod	Daniel Fuks	2016-2018	A1	1b	section layer 5		2015-02-15	Dry Sift	3	14	גלל		שבר						2
HLZ-52	Elusa	Bar-Oz, Gini and Weissbrod	Daniel Fuks	2016-2018	A1	1b	section layer 5		2015-02-01	Dry Sift	3	15	קשקשי דג								2
HLZ-53	Elusa	Bar-Oz, Gini and Weissbrod	Daniel Fuks	2016-2018	A1	1b	section layer 5	5b	2015-02-01	Dry Sift	3	1	שעורה	Hordeum vulgare	גרגיר	grain	דגניים	Gramineae	8	8	2
HLZ-53	Elusa	Bar-Oz, Gini and Weissbrod	Daniel Fuks	2016-2018	A1	1b	section layer 5		2015-02-01	Dry Sift	3	2	גפן	Vitis vinifera	חרצן	pip	גפניים	Vitaceae	3	3	2
HLZ-53	Elusa	Bar-Oz, Gini and Weissbrod	Daniel Fuks	2016-2018	A1	1b	section layer 5		2015-02-01	Dry Sift	3	3	גפן	Vitis vinifera	עוקץ	pedicel	גפניים	Vitaceae	1	1	2
HLZ-53	Elusa	Bar-Oz, Gini and Weissbrod	Daniel Fuks	2016-2018	A1	1b	section layer 5		2015-02-01	Dry Sift	3	4			פרקי דגן	culm nodes	דגניים	Gramineae	20	20	2
HLZ-53	Elusa	Bar-Oz, Gini and Weissbrod	Daniel Fuks	2016-2018	A1	1b	section layer 5		2015-02-01	Dry Sift	3	5	עדשה?		חצי זרע				1	1	2
HLZ-53	Elusa	Bar-Oz, Gini and Weissbrod	Daniel Fuks	2016-2018	A1	1b	section layer 5		2015-02-01	Dry Sift	3	6	תמר	Phoenix dactylifera	שבר גלעין				1	1	2
HLZ-53	Elusa	Bar-Oz, Gini and Weissbrod	Daniel Fuks	2016-2018	A1	1b	section layer 5		2015-02-01	Dry Sift	3	7	קטנית		פסיג	cotyledon			1	1	2
HLZ-53	Elusa	Bar-Oz, Gini and Weissbrod	Daniel Fuks	2016-2018	A1	1b	section layer 5		2015-02-01	Dry Sift	3	8	מתנן שעיר	Thymelaea hirsuta	זרע				1	1	2
HLZ-53	Elusa	Bar-Oz, Gini and Weissbrod	Daniel Fuks	2016-2018	A1	1b	section layer 5		2015-02-01	Dry Sift	3	9	חמד/יפרוק	Salsoleae					1	1	2
HLZ-53	Elusa	Bar-Oz, Gini and Weissbrod	Daniel Fuks	2016-2018	A1	1b	section layer 5		2015-02-01	Dry Sift	3	10	?אמיך קוצני			unripe fruit?			1	1	2
HLZ-53	Elusa	Bar-Oz, Gini and Weissbrod	Daniel Fuks	2016-2018	A1	1b	section layer 5		2015-02-01	Dry Sift	3	11	מורכבים	Asteraceae	ראש			Asteraceae	1	1	2
HLZ-53	Elusa	Bar-Oz, Gini and Weissbrod	Daniel Fuks	2016-2018	A1	1b	section layer 5		2015-02-01	Dry Sift	3	12	מתנן שעיר	Thymelaea hirsuta	ענף פורה				2	2	2
HLZ-53	Elusa	Bar-Oz, Gini and Weissbrod	Daniel Fuks	2016-2018	A1	1b	section layer 5		2015-02-01	Dry Sift	3	13	שורשי דגן?						2	2	2
HLZ-53	Elusa	Bar-Oz, Gini and Weissbrod	Daniel Fuks	2016-2018	A1	1b	section layer 5		2015-02-01	Dry Sift	3	14	דגני ענף?						2	2	2
HLZ-53	Elusa	Bar-Oz, Gini and Weissbrod	Daniel Fuks	2016-2018	A1	1b	section layer 5		2015-02-01	Dry Sift	3	15	בלתי		ענף עם עלים				3	3	2								להמשך
HLZ-53	Elusa	Bar-Oz, Gini and Weissbrod	Daniel Fuks	2016-2018	A1	1b	section layer 5		2015-02-01	Dry Sift	3	16			שברי גרגיר	grain fragments	דגניים	Gramineae			2
HLZ-54	Elusa	Bar-Oz, Gini and Weissbrod	Daniel Fuks	2016-2018	A1	1b	section layer 5	5c	2015-02-01	Dry Sift	3	1	שעורה	Hordeum vulgare	גרגיר	grain	דגניים	Gramineae	11	11	2
HLZ-54	Elusa	Bar-Oz, Gini and Weissbrod	Daniel Fuks	2016-2018	A1	1b	section layer 5		2015-02-01	Dry Sift	3	2	חיטה/שעורה	Hordeum cf. Triticum	גרגיר	grain	דגניים	Gramineae	1	1	2
HLZ-54	Elusa	Bar-Oz, Gini and Weissbrod	Daniel Fuks	2016-2018	A1	1b	section layer 5		2015-02-01	Dry Sift	3	3	גפן	Vitis vinifera	חרצן	pip	גפניים	Vitaceae	4	4	2
HLZ-54	Elusa	Bar-Oz, Gini and Weissbrod	Daniel Fuks	2016-2018	A1	1b	section layer 5		2015-02-01	Dry Sift	3	4	גפן	Vitis vinifera	עוקץ	pedicel	גפניים	Vitaceae	2	2	2
HLZ-54	Elusa	Bar-Oz, Gini and Weissbrod	Daniel Fuks	2016-2018	A1	1b	section layer 5		2015-02-01	Dry Sift	3	5			פרקי דגן	culm nodes	דגניים	Gramineae	6	6	2							1שורש
HLZ-54	Elusa	Bar-Oz, Gini and Weissbrod	Daniel Fuks	2016-2018	A1	1b	section layer 5		2015-02-01	Dry Sift	3	6	תאנה?		אגוזית בציפה						2
HLZ-54	Elusa	Bar-Oz, Gini and Weissbrod	Daniel Fuks	2016-2018	A1	1b	section layer 5		2015-02-01	Dry Sift	3	7	בקיים	Vicieae					4	4	2
HLZ-54	Elusa	Bar-Oz, Gini and Weissbrod	Daniel Fuks	2016-2018	A1	1b	section layer 5		2015-02-01	Dry Sift	3	8	דבקה? שושני?						1	1	2
HLZ-54	Elusa	Bar-Oz, Gini and Weissbrod	Daniel Fuks	2016-2018	A1	1b	section layer 5		2015-02-01	Dry Sift	3	9	חמד/יפרוק						1	1	2
HLZ-54	Elusa	Bar-Oz, Gini and Weissbrod	Daniel Fuks	2016-2018	A1	1b	section layer 5		2015-02-01	Dry Sift	3	10	בלתי-שונות								2
HLZ-55	Elusa	Bar-Oz, Gini and Weissbrod	Daniel Fuks	2016-2018	A1	1b	section layer 5	5d	2015-02-01	Dry Sift	3	1	שעורה	Hordeum vulgare	גרגיר	grain	דגניים	Gramineae	9	9	2
HLZ-55	Elusa	Bar-Oz, Gini and Weissbrod	Daniel Fuks	2016-2018	A1	1b	section layer 5		2015-02-01	Dry Sift	check	2	גפן	Vitis vinifera	חרצן	pip	גפניים	Vitaceae	8	8	2
HLZ-55	Elusa	Bar-Oz, Gini and Weissbrod	Daniel Fuks	2016-2018	A1	1b	section layer 5		2015-02-01	Dry Sift	check	3	גפן	Vitis vinifera	עוקץ	pedicel	גפניים	Vitaceae	1	1	2
HLZ-55	Elusa	Bar-Oz, Gini and Weissbrod	Daniel Fuks	2016-2018	A1	1b	section layer 5		2015-02-01	Dry Sift	check	4			פרקי דגן	culm nodes	דגניים	Gramineae	14	14	2
HLZ-55	Elusa	Bar-Oz, Gini and Weissbrod	Daniel Fuks	2016-2018	A1	1b	section layer 5		2015-02-01	Dry Sift	check	5	עדשה?						2?	2?	2								אחד עדשה כנראה
HLZ-55	Elusa	Bar-Oz, Gini and Weissbrod	Daniel Fuks	2016-2018	A1	1b	section layer 5		2015-02-01	Dry Sift	check	6	בקיים						1	1	2
HLZ-55	Elusa	Bar-Oz, Gini and Weissbrod	Daniel Fuks	2016-2018	A1	1b	section layer 5		2015-02-01	Dry Sift	check	7	מתנן שעיר	Thymelaea hirsuta	זרע				1	1	2
HLZ-55	Elusa	Bar-Oz, Gini and Weissbrod	Daniel Fuks	2016-2018	A1	1b	section layer 6		2015-02-01	Dry Sift	3	8	מתנן שעיר	Thymelaea hirsuta	ענף ועלים				1	1	2
HLZ-55	Elusa	Bar-Oz, Gini and Weissbrod	Daniel Fuks	2016-2018	A1	1b	section layer 6		2015-02-01	Dry Sift	3	9	חמד/יפרוק						1	1	2
HLZ-55	Elusa	Bar-Oz, Gini and Weissbrod	Daniel Fuks	2016-2018	A1	1b	section layer 6		2015-02-01	Dry Sift	3	10	בלתי		ענף ועלים				1	1	2
HLZ-55	Elusa	Bar-Oz, Gini and Weissbrod	Daniel Fuks	2016-2018	A1	1b	section layer 6		2015-02-15	Dry Sift	3	11	בלתי						1	1	2				לא מפוחם - זרע או חרק?
HLZ-55	Elusa	Bar-Oz, Gini and Weissbrod	Daniel Fuks	2016-2018	A1	1b	section layer 6		2015-02-15	Dry Sift	3	12	בלתי-שונות								2
HLZ-56	Elusa	Bar-Oz, Gini and Weissbrod	Daniel Fuks	2016-2018	A1	1b	section layer 6	6a	2015-02-01	Dry Sift	3	1	שעורה	Hordeum vulgare	גרגיר	grain	דגניים	Gramineae	46	46	2
HLZ-56	Elusa	Bar-Oz, Gini and Weissbrod	Daniel Fuks	2016-2018	A1	1b	section layer 6		2015-02-01	Dry Sift	3	2	חיטה/שעורה	Hordeum cf. Triticum	גרגיר	grain	דגניים	Gramineae	6	6	2
HLZ-56	Elusa	Bar-Oz, Gini and Weissbrod	Daniel Fuks	2016-2018	A1	1b	section layer 6		2015-02-01	Dry Sift	3	3	גפן	Vitis vinifera	חרצן	pip	גפניים	Vitaceae	5	5	2
HLZ-56	Elusa	Bar-Oz, Gini and Weissbrod	Daniel Fuks	2016-2018	A1	1b	section layer 6		2015-02-01	Dry Sift	3	4			פרקי דגן	culm nodes	דגניים	Gramineae	57	57	2
HLZ-56	Elusa	Bar-Oz, Gini and Weissbrod	Daniel Fuks	2016-2018	A1	1b	section layer 6		2015-02-01	Dry Sift	3	5	שעורה	Hordeum vulgare	פרק ציר שיבולת	rachis fragment	דגניים	Gramineae	11	11	2
HLZ-56	Elusa	Bar-Oz, Gini and Weissbrod	Daniel Fuks	2016-2018	A1	1b	section layer 6		2015-02-01	Dry Sift	3	6	עדשה תרבותית	Lens culinaris	זרע	seed	פרפרניים	Fabaceae	19	19	2
HLZ-56	Elusa	Bar-Oz, Gini and Weissbrod	Daniel Fuks	2016-2018	A1	1b	section layer 6		2015-02-01	Dry Sift	3	7	בקיית הכרשינה	Vicia ervilia	זרע	seed	פרפרניים	Fabaceae	1	1	2				ועוד פסיג שאולי זה
HLZ-56	Elusa	Bar-Oz, Gini and Weissbrod	Daniel Fuks	2016-2018	A1	1b	section layer 6		2015-02-01	Dry Sift	3	8	בקיים	Vicieae					5?	5?	2
HLZ-56	Elusa	Bar-Oz, Gini and Weissbrod	Daniel Fuks	2016-2018	A1	1b	section layer 6		2015-02-01	Dry Sift	3	9	בלתי						1	1	2
HLZ-56	Elusa	Bar-Oz, Gini and Weissbrod	Daniel Fuks	2016-2018	A1	1b	section layer 6		2015-02-01	Dry Sift	3	10	תמר	Phoenix dactylifera	שבר גלעין	seed fragment			1	1	2
HLZ-56	Elusa	Bar-Oz, Gini and Weissbrod	Daniel Fuks	2016-2018	A1	1b	section layer 6		2015-02-15	Dry Sift	3	11	מתנן שעיר	Thymelaea hirsuta	ענף				2	2	2
HLZ-56	Elusa	Bar-Oz, Gini and Weissbrod	Daniel Fuks	2016-2018	A1	1b	section layer 6		2015-02-15	Dry Sift	3	12	חמד/יפרוק	Salsoleae					1	1	2
HLZ-56	Elusa	Bar-Oz, Gini and Weissbrod	Daniel Fuks	2016-2018	A1	1b	section layer 6		2015-02-01	Dry Sift	3	13	קרקפת מורכבים	Asteraceae				Asteraceae			2
HLZ-56	Elusa	Bar-Oz, Gini and Weissbrod	Daniel Fuks	2016-2018	A1	1b	section layer 6		2015-02-01	Dry Sift	3	14	בלתי				מורכבים?				2
HLZ-56	Elusa	Bar-Oz, Gini and Weissbrod	Daniel Fuks	2016-2018	A1	1b	section layer 6		2015-02-01	Dry Sift	3	15	בלתי								2
HLZ-56	Elusa	Bar-Oz, Gini and Weissbrod	Daniel Fuks	2016-2018	A1	1b	section layer 6		2015-02-01	Dry Sift	3	16	תאנה בגלל?								2
HLZ-56	Elusa	Bar-Oz, Gini and Weissbrod	Daniel Fuks	2016-2018	A1	1b	section layer 6		2015-02-01	Dry Sift	3	17	סיבים								2
HLZ-56	Elusa	Bar-Oz, Gini and Weissbrod	Daniel Fuks	2016-2018	A1	1b	section layer 6		2015-02-01	Dry Sift	3	18	בלתי-שונות								2
HLZ-57	Elusa	Bar-Oz, Gini and Weissbrod	Daniel Fuks	2016-2018	A1	1b	section layer 6	6b	2015-02-01	Dry Sift	3	1	שעורה	Hordeum vulgare	גרגיר	grain	דגניים	Gramineae	38	38									2
HLZ-57	Elusa	Bar-Oz, Gini and Weissbrod	Daniel Fuks	2016-2018	A1	1b	section layer 6		2015-02-01	Dry Sift	3	2	חיטה	Triticum	גרגיר	grain	דגניים	Gramineae	5	5	2
HLZ-57	Elusa	Bar-Oz, Gini and Weissbrod	Daniel Fuks	2016-2018	A1	1b	section layer 6		2015-02-01	Dry Sift	3	3	חיטה/שעורה	Hordeum cf. Triticum	גרגיר	grain	דגניים	Gramineae	2	2	2
HLZ-57	Elusa	Bar-Oz, Gini and Weissbrod	Daniel Fuks	2016-2018	A1	1b	section layer 6		2015-02-01	Dry Sift	3	4	גפן	Vitis vinifera	חרצן	pip	גפניים	Vitaceae	10	10	2
HLZ-57	Elusa	Bar-Oz, Gini and Weissbrod	Daniel Fuks	2016-2018	A1	1b	section layer 6		2015-02-01	Dry Sift	3	5	גפן	Vitis vinifera	עוקץ	pedicel	גפניים	Vitaceae	2	2	2
HLZ-57	Elusa	Bar-Oz, Gini and Weissbrod	Daniel Fuks	2016-2018	A1	1b	section layer 6		2015-02-01	Dry Sift	3	6			פרקי דגן	culm nodes	דגניים	Gramineae	30	30	2
HLZ-57	Elusa	Bar-Oz, Gini and Weissbrod	Daniel Fuks	2016-2018	A1	1b	section layer 6		2015-02-01	Dry Sift	3	7	עדשה תרבותית	Lens culinaris	זרע	seed	פרפרניים	Fabaceae	12	12	2
HLZ-57	Elusa	Bar-Oz, Gini and Weissbrod	Daniel Fuks	2016-2018	A1	1b	section layer 6		2015-02-01	Dry Sift	3	8	בקיים	Vicieae	זרע	seed	פרפרניים	Fabaceae	17	17	2				יואל ראה, לא להתעסק. מבחינת גודל וצורה אולי יש בקיה תרבותית
HLZ-57	Elusa	Bar-Oz, Gini and Weissbrod	Daniel Fuks	2016-2018	A1	1b	section layer 6		2015-02-01	Dry Sift	3	9	אמיך קוצני	Emex spinosa	פרי				1	1	2
HLZ-57	Elusa	Bar-Oz, Gini and Weissbrod	Daniel Fuks	2016-2018	A1	1b	section layer 6		2015-02-15	Dry Sift	3	10	מתנן שעיר	Thymelaea hirsuta	זרע	seed	מתנניים	Thymelaceae	1	1	2
HLZ-57	Elusa	Bar-Oz, Gini and Weissbrod	Daniel Fuks	2016-2018	A1	1b	section layer 6		2015-02-15	Dry Sift	3	11	ציפרני החתול?	Calendula sp.?					1	1	2
HLZ-57	Elusa	Bar-Oz, Gini and Weissbrod	Daniel Fuks	2016-2018	A1	1b	section layer 6		2015-02-01	Dry Sift	3	12	מורכבים	Asteraceae					1	1	2
HLZ-57	Elusa	Bar-Oz, Gini and Weissbrod	Daniel Fuks	2016-2018	A1	1b	section layer 6		2015-02-01	Dry Sift	3	13	בלתי						2	2	2								יואל ראה, אבל אני לא זוכר אם הוא אמר כיוון של פגוניה או בוצין, פיגמיים
HLZ-57	Elusa	Bar-Oz, Gini and Weissbrod	Daniel Fuks	2016-2018	A1	1b	section layer 6		2015-02-01	Dry Sift	3	14	דגני?		?פרק ציר שיבולת	rachis fragment?					2								מיוחד	יואל ראה, אין כיוון כרגע
HLZ-57	Elusa	Bar-Oz, Gini and Weissbrod	Daniel Fuks	2016-2018	A1	1b	section layer 6		2015-02-01	Dry Sift	3	15	בלתי-שונות								2
HLZ-57	Elusa	Bar-Oz, Gini and Weissbrod	Daniel Fuks	2016-2018	A1	1b	section layer 6		2015-02-01	Dry Sift	3	16	סיבים								2
HLZ-57	Elusa	Bar-Oz, Gini and Weissbrod	Daniel Fuks	2016-2018	A1	1b	section layer 6		2015-02-01	Dry Sift	3	17	גלל								2				לחפש תאנה
HLZ-57	Elusa	Bar-Oz, Gini and Weissbrod	Daniel Fuks	2016-2018	A1	1b	section layer 6		2015-02-01	Dry Sift	3	18	קטנית- בלתי		זרע	seed	פרפרניים	Fabaceae	1	1	2
HLZ-57	Elusa	Bar-Oz, Gini and Weissbrod	Daniel Fuks	2016-2018	A1	1b	section layer 6		2015-02-01	Dry Sift	3	19	בקיי להגדרה	Vicieae	זרע	seed	פרפרניים	Fabaceae	1	1									לא כרשינה או עדשה
HLZ-58	Elusa	Bar-Oz, Gini and Weissbrod	Daniel Fuks	2016-2018	A1	1b	section layer7	7	2015-02-01	Dry Sift	3	1	שעורה	Hordeum vulgare	גרגיר	grain	דגניים	Gramineae	1	1									2
HLZ-58	Elusa	Bar-Oz, Gini and Weissbrod	Daniel Fuks	2016-2018	A1	1b	section layer7		2015-02-01	Dry Sift	10	2	חיטה/שעורה	Hordeum cf. Triticum	גרגיר	grain	דגניים	Gramineae	1	1	2
HLZ-58	Elusa	Bar-Oz, Gini and Weissbrod	Daniel Fuks	2016-2018	A1	1b	section layer7		2015-02-01	Dry Sift	10	3	גפן	Vitis vinifera	חרצן	pip	גפניים	Vitaceae	1	1	2
HLZ-58	Elusa	Bar-Oz, Gini and Weissbrod	Daniel Fuks	2016-2018	A1	1b	section layer7		2015-02-01	Dry Sift	10	4	מתנן שעיר	Thymelaea hirsuta	עלים וענפים	leaves, branches	מתנניים	Thymelaceae			2
HLZ-58	Elusa	Bar-Oz, Gini and Weissbrod	Daniel Fuks	2016-2018	A1	1b	section layer7		2015-02-01	Dry Sift	10	5	מתנן שעיר?	Thymelaea hirsuta?	זרע	seed	מתנניים	Thymelaceae	1	1	2
HLZ-58	Elusa	Bar-Oz, Gini and Weissbrod	Daniel Fuks	2016-2018	A1	1b	section layer7		2015-02-01	Dry Sift	10	6	אמיך קוצני	Emex spinosa	פרי	fruit	ארכוביתיים	Polygonaceae	1	1	2				פרי צעיר
HLZ-58	Elusa	Bar-Oz, Gini and Weissbrod	Daniel Fuks	2016-2018	A1	1b	section layer7		2015-02-01	Dry Sift	10	7	בוצין	Verbascum sp.					8	8	2
HLZ-58	Elusa	Bar-Oz, Gini and Weissbrod	Daniel Fuks	2016-2018	A1	1b	section layer7		2015-02-01	Dry Sift	10	8	פגוניה	Fagonia sp.	פרי	fruit		Zygophyllaceae	2	2	2								צריך להרחיב את האוסף של פגוניה
HLZ-58	Elusa	Bar-Oz, Gini and Weissbrod	Daniel Fuks	2016-2018	A1	1b	section layer7		2015-02-01	Dry Sift	10	9	יפרוק המדבר?	Salsoleae							2
HLZ-58	Elusa	Bar-Oz, Gini and Weissbrod	Daniel Fuks	2016-2018	A1	1b	section layer7		2015-02-01	Dry Sift	10	10	קחוון מצוי	Anthemis pseudocotula	קרקפת	capitulum	מורכבים	Asteraceae			2
HLZ-58	Elusa	Bar-Oz, Gini and Weissbrod	Daniel Fuks	2016-2018	A1	1b	section layer7		2015-02-01	Dry Sift	10	11	עולש מצוי	Cichorium endivia	קרקפת	capitulum	מורכבים	Asteraceae	4	4	2
HLZ-58	Elusa	Bar-Oz, Gini and Weissbrod	Daniel Fuks	2016-2018	A1	1b	section layer7		2015-02-01	Dry Sift	10	12	בלתי		קרקפת	capitulum	מורכבים	Asteraceae			2
HLZ-58	Elusa	Bar-Oz, Gini and Weissbrod	Daniel Fuks	2016-2018	A1	1b	section layer7		2015-02-01	Dry Sift	10	13	בלתי		קרקפת?	capitulum?	מורכבים?	Asteraceae?			2
HLZ-58	Elusa	Bar-Oz, Gini and Weissbrod	Daniel Fuks	2016-2018	A1	1b	section layer7		2015-02-01	Dry Sift	10	14	בלתי								2
HLZ-58	Elusa	Bar-Oz, Gini and Weissbrod	Daniel Fuks	2016-2018	A1	1b	section layer7		2015-02-01	Dry Sift	10	15	פיגמית?	cf. Haplophyllum tuberculatum							2
HLZ-58	Elusa	Bar-Oz, Gini and Weissbrod	Daniel Fuks	2016-2018	A1	1b	section layer7		2015-02-01	Dry Sift	10	16	בלתי
HLZ-58	Elusa	Bar-Oz, Gini and Weissbrod	Daniel Fuks	2016-2018	A1	1b	section layer7		2015-02-01	Dry Sift	10	17	cf. פגוניה	cf. Fagonia	פרודה?
HLZ-58	Elusa	Bar-Oz, Gini and Weissbrod	Daniel Fuks	2016-2018	A1	1b	section layer7		2015-02-01	Dry Sift	10	18	בלתי
HLZ-58	Elusa	Bar-Oz, Gini and Weissbrod	Daniel Fuks	2016-2018	A1	1b	section layer7		2015-02-01	Dry Sift	10	19	בלתי
HLZ-58	Elusa	Bar-Oz, Gini and Weissbrod	Daniel Fuks	2016-2018	A1	1b	section layer7		2015-02-01	Dry Sift	10	20	בלתי
HLZ-58	Elusa	Bar-Oz, Gini and Weissbrod	Daniel Fuks	2016-2018	A1	1b	section layer7		2015-02-01	Dry Sift	10	21	בלתי
HLZ-58	Elusa	Bar-Oz, Gini and Weissbrod	Daniel Fuks	2016-2018	A1	1b	section layer7		2015-02-01	Dry Sift	10	22	בלתי
HLZ-58	Elusa	Bar-Oz, Gini and Weissbrod	Daniel Fuks	2016-2018	A1	1b	section layer7		2015-02-01	Dry Sift	10	23	בלתי
HLZ-58	Elusa	Bar-Oz, Gini and Weissbrod	Daniel Fuks	2016-2018	A1	1b	section layer7		2015-02-01	Dry Sift	10	24	בלתי		ענפים										נראה עם פרי בסוף
HLZ-58	Elusa	Bar-Oz, Gini and Weissbrod	Daniel Fuks	2016-2018	A1	1b	section layer7		2015-02-01	Dry Sift	10	25	מתנן??		ענפים
HLZ-58	Elusa	Bar-Oz, Gini and Weissbrod	Daniel Fuks	2016-2018	A1	1b	section layer7		2015-02-01	Dry Sift	10	26	בלתי		ענפים
HLZ-58	Elusa	Bar-Oz, Gini and Weissbrod	Daniel Fuks	2016-2018	A1	1b	section layer7		2015-02-01	Dry Sift	10	27	בלתי-שונות
HLZ-58	Elusa	Bar-Oz, Gini and Weissbrod	Daniel Fuks	2016-2018	A1	1b	section layer7		2015-02-01	Dry Sift	10	28	גלל
HLZ-58	Elusa	Bar-Oz, Gini and Weissbrod	Daniel Fuks	2016-2018	A1	1b	section layer7		2015-02-01	Dry Sift	10	29	פחם ובלתי
HLZ-58	Elusa	Bar-Oz, Gini and Weissbrod	Daniel Fuks	2016-2018	A1	1b	section layer7		2015-02-15	Dry Sift	10	30	שעורה שש-טורית	Hordeum vulgare subsp. Hexastichum	פרק ציר שיבולת	rachis	דגניים	Gramineae	1	1	1mm - subsample 1
HLZ-58	Elusa	Bar-Oz, Gini and Weissbrod	Daniel Fuks	2016-2018	A1	1b	section layer7		2015-02-15	Dry Sift	10	31	גפן	Vitis vinifera	עוקץ	pedicel	גפניים	Vitaceae	1	1	1mm - subsample 1				להמשך
HLZ-58	Elusa	Bar-Oz, Gini and Weissbrod	Daniel Fuks	2016-2018	A1	1b	section layer7		2015-02-01	Dry Sift	10	32	דרדר להגדרה						1	1	1mm - subsample 1				להגדרה
HLZ-58	Elusa	Bar-Oz, Gini and Weissbrod	Daniel Fuks	2016-2018	A1	1b	section layer7		2015-02-01	Dry Sift	10	33	אספסת		זרע?	seed?			1	1	1mm - subsample 1
HLZ-58	Elusa	Bar-Oz, Gini and Weissbrod	Daniel Fuks	2016-2018	A1	1b	section layer7		2015-02-01	Dry Sift	10	34	גלל(לא של צאן)		גלל				1	1	1mm - subsample 1
HLZ-58	Elusa	Bar-Oz, Gini and Weissbrod	Daniel Fuks	2016-2018	A1	1b	section layer7		2015-02-01	Dry Sift	10	35	מתנן שעיר	Thymelaea hirsuta	אגוזית	nutlet	מתנניים	Thymelaceae	6	6	1mm - subsample 1
HLZ-58	Elusa	Bar-Oz, Gini and Weissbrod	Daniel Fuks	2016-2018	A1	1b	section layer7		2015-02-01	Dry Sift	10	36	מתנן שעיר	Thymelaea hirsuta	ניצן	bud	מתנניים	Thymelaceae	7	7	1mm - subsample 1
HLZ-58	Elusa	Bar-Oz, Gini and Weissbrod	Daniel Fuks	2016-2018	A1	1b	section layer7		2015-02-01	Dry Sift	10	37	מתנן שעיר	Thymelaea hirsuta	עלה	leaf	מתנניים	Thymelaceae	50	50	1mm - subsample 1
HLZ-58	Elusa	Bar-Oz, Gini and Weissbrod	Daniel Fuks	2016-2018	A1	1b	section layer7		2015-02-01	Dry Sift	10	38	אשל הפרקים	Tamarix aphylla	זרע?	seed?			1	1	1mm - subsample 1
HLZ-58	Elusa	Bar-Oz, Gini and Weissbrod	Daniel Fuks	2016-2018	A1	1b	section layer7		2015-02-01	Dry Sift	10	39	בלתי - שונות								1mm - subsample 1
HLZ-58	Elusa	Bar-Oz, Gini and Weissbrod	Daniel Fuks	2016-2018	A1	1b	section layer7		2015-02-01	Dry Sift	10	40	?		קשקש עלה				18	18	1mm - subsample 1				להגדיר בהמשך
HLZ-58	Elusa	Bar-Oz, Gini and Weissbrod	Daniel Fuks	2016-2018	A1	1b	section layer7		2015-02-01	Dry Sift	10	41	בלתי - ליואל								1mm - subsample 1				להגדיר בהמשך
HLZ-58	Elusa	Bar-Oz, Gini and Weissbrod	Daniel Fuks	2016-2018	A1	1b	section layer7		2015-02-15	Dry Sift	10	42	דגני		גרגיר	grain	דגניים	Gramineae	1	1	1mm - subsample 2
HLZ-58	Elusa	Bar-Oz, Gini and Weissbrod	Daniel Fuks	2016-2018	A1	1b	section layer7		2015-02-15	Dry Sift	10	43	מלוח	Atriplex sp.	זרע?	seed?			1	1	1mm - subsample 2				להגדרה
HLZ-58	Elusa	Bar-Oz, Gini and Weissbrod	Daniel Fuks	2016-2018	A1	1b	section layer7		2015-02-01	Dry Sift	10	44	בר - עכנאי	Echiochilon fruticosum	זרע?	seed?			3	3	1mm - subsample 2
HLZ-58	Elusa	Bar-Oz, Gini and Weissbrod	Daniel Fuks	2016-2018	A1	1b	section layer7		2015-02-01	Dry Sift	10	45	מתנן שעיר	Thymelaea hirsuta	גביע		מתנניים	Thymelaceae	2	2	1mm - subsample 2
HLZ-58	Elusa	Bar-Oz, Gini and Weissbrod	Daniel Fuks	2016-2018	A1	1b	section layer7		2015-02-01	Dry Sift	10	46	מתנן שעיר	Thymelaea hirsuta	אגוזית	nutlet	מתנניים	Thymelaceae	7	7	1mm - subsample 2
HLZ-58	Elusa	Bar-Oz, Gini and Weissbrod	Daniel Fuks	2016-2018	A1	1b	section layer7		2015-02-01	Dry Sift	10	47	מתנן שעיר	Thymelaea hirsuta	עלה	leaf	מתנניים	Thymelaceae	47	47	1mm - subsample 2
HLZ-58	Elusa	Bar-Oz, Gini and Weissbrod	Daniel Fuks	2016-2018	A1	1b	section layer7		2015-02-01	Dry Sift	10	48	מתנן שעיר	Thymelaea hirsuta	ניצן/גביע	bud/	מתנניים	Thymelaceae	3	3	1mm - subsample 2
HLZ-58	Elusa	Bar-Oz, Gini and Weissbrod	Daniel Fuks	2016-2018	A1	1b	section layer7		2015-02-01	Dry Sift	10	49	ליואל						1	1	1mm - subsample 2
HLZ-58	Elusa	Bar-Oz, Gini and Weissbrod	Daniel Fuks	2016-2018	A1	1b	section layer7		2015-02-01	Dry Sift	10	50		Salsoleae?	קשקשי עלה						1mm - subsample 2
HLZ-58	Elusa	Bar-Oz, Gini and Weissbrod	Daniel Fuks	2016-2018	A1	1b	section layer7		2015-02-01	Dry Sift	10	51	בלתי - שונות								1mm - subsample 2
HLZ-58	Elusa	Bar-Oz, Gini and Weissbrod	Daniel Fuks	2016-2018	A1	1b	section layer7		2015-02-01	Dry Sift	10	52	גפן	Vitis vinifera	שברי חרצן		גפניים	Vitaceae	1	1	1mm - subsample 3
HLZ-58	Elusa	Bar-Oz, Gini and Weissbrod	Daniel Fuks	2016-2018	A1	1b	section layer7		2015-02-01	Dry Sift	10	53	קורטם	Carthamus sp.	זרעון	achene	מורכבים	Asteraceae	2	2	1mm - subsample 3
HLZ-58	Elusa	Bar-Oz, Gini and Weissbrod	Daniel Fuks	2016-2018	A1	1b	section layer7		2015-02-01	Dry Sift	10	54	אשל הפרקים	Tamarix aphylla	זרע?	seed?			2	2	1mm - subsample 3									לא נראה לי קורטם דק. נראה לי צריך יותר, גם באוסף בשביל להכריע...
HLZ-58	Elusa	Bar-Oz, Gini and Weissbrod	Daniel Fuks	2016-2018	A1	1b	section layer7		2015-02-01	Dry Sift	10	55	דגני		גרגיר?	grain?	דגניים	Gramineae	2	2	1mm - subsample 3				להגדרה
HLZ-58	Elusa	Bar-Oz, Gini and Weissbrod	Daniel Fuks	2016-2018	A1	1b	section layer7		2015-02-01	Dry Sift	10	56	בלתי						1	1	1mm - subsample 3				להמשך-היה ליואל פעם
HLZ-58	Elusa	Bar-Oz, Gini and Weissbrod	Daniel Fuks	2016-2018	A1	1b	section layer7		2015-02-01	Dry Sift	10	57	מתנן שעיר	Thymelaea hirsuta	גביע		מתנניים	Thymelaceae	3	3	1mm - subsample 3
HLZ-58	Elusa	Bar-Oz, Gini and Weissbrod	Daniel Fuks	2016-2018	A1	1b	section layer7		2015-02-01	Dry Sift	10	58	מתנן שעיר	Thymelaea hirsuta	אגוזית	nutlet	מתנניים	Thymelaceae	6	6	1mm - subsample 3
HLZ-58	Elusa	Bar-Oz, Gini and Weissbrod	Daniel Fuks	2016-2018	A1	1b	section layer7		2015-02-15	Dry Sift	10	59	מתנן שעיר	Thymelaea hirsuta	ניצן	bud	מתנניים	Thymelaceae	18	18	1mm - subsample 3				קצות ענף
HLZ-58	Elusa	Bar-Oz, Gini and Weissbrod	Daniel Fuks	2016-2018	A1	1b	section layer7		2015-02-15	Dry Sift	10	60	מתנן שעיר	Thymelaea hirsuta	עלה	leaf	מתנניים	Thymelaceae	46	46	1mm - subsample 3
HLZ-58	Elusa	Bar-Oz, Gini and Weissbrod	Daniel Fuks	2016-2018	A1	1b	section layer7		2015-02-01	Dry Sift	10	61	בלתי - שונות								1mm - subsample 3
HLZ-58	Elusa	Bar-Oz, Gini and Weissbrod	Daniel Fuks	2016-2018	A1	1b	section layer7		2015-02-01	Dry Sift	10	62	ליואל						2	2	1mm - subsample 3
HLZ-58	Elusa	Bar-Oz, Gini and Weissbrod	Daniel Fuks	2016-2018	A1	1b	section layer7		2015-02-01	Dry Sift	10	63	?		עלה קשקשי				12	12	1mm - subsample 3				להגדרה
HLZ-58	Elusa	Bar-Oz, Gini and Weissbrod	Daniel Fuks	2016-2018	A1	1b	section layer7		2015-02-01	Dry Sift	10	64	חיטה טטרפלוידית			rachis	דגניים	Gramineae	1	1	1mm - subsample 4
HLZ-58	Elusa	Bar-Oz, Gini and Weissbrod	Daniel Fuks	2016-2018	A1	1b	section layer7		2015-02-01	Dry Sift	10	65	גפן??	Vitis vinifera??	עוקץ	pedicel			1	1	1mm - subsample 4
HLZ-58	Elusa	Bar-Oz, Gini and Weissbrod	Daniel Fuks	2016-2018	A1	1b	section layer7		2015-02-01	Dry Sift	10	66	שעורה שש-טורית	Hordeum		rachis	דגניים	Gramineae	1	1	1mm - subsample 4
HLZ-58	Elusa	Bar-Oz, Gini and Weissbrod	Daniel Fuks	2016-2018	A1	1b	section layer7		2015-02-01	Dry Sift	10	67	מתנן שעיר	Thymelaea hirsuta	אגוזית	nutlet	מתנניים	Thymelaceae	1	1	1mm - subsample 4
HLZ-58	Elusa	Bar-Oz, Gini and Weissbrod	Daniel Fuks	2016-2018	A1	1b	section layer7		2015-02-01	Dry Sift	10	68	מתנן שעיר	Thymelaea hirsuta	ניצן/גביע	bud/	מתנניים	Thymelaceae	10	10	1mm - subsample 4
HLZ-58	Elusa	Bar-Oz, Gini and Weissbrod	Daniel Fuks	2016-2018	A1	1b	section layer7		2015-02-01	Dry Sift	10	69	מתנן שעיר	Thymelaea hirsuta	עלה	leaf	מתנניים	Thymelaceae	46	46	1mm - subsample 4				כולל??????? עם 4
HLZ-58	Elusa	Bar-Oz, Gini and Weissbrod	Daniel Fuks	2016-2018	A1	1b	section layer7		2015-02-01	Dry Sift	10	70	בלתי - שונות								1mm - subsample 4				למיין בהמשך
HLZ-58	Elusa	Bar-Oz, Gini and Weissbrod	Daniel Fuks	2016-2018	A1	1b	section layer7		2015-02-01	Dry Sift	10	71	בלתי - ליואל						1	1	1mm - subsample 4				לחבר ולהגדיר בהמשך
HLZ-58	Elusa	Bar-Oz, Gini and Weissbrod	Daniel Fuks	2016-2018	A1	1b	section layer7		2015-02-01	Dry Sift	10	72	בר - עכנאי	Echiochilon fruticosum	זרע?	seed?			1	1	1mm - subsample 4
HLZ-58	Elusa	Bar-Oz, Gini and Weissbrod	Daniel Fuks	2016-2018	A1	1b	section layer7		2015-02-01	Dry Sift	10	73	בלתי - שונות								1mm - subsample 5				למיין בהמשך
HLZ-58	Elusa	Bar-Oz, Gini and Weissbrod	Daniel Fuks	2016-2018	A1	1b	section layer7		2015-02-01	Dry Sift	10	74	חיטה טטרפלוידית	Triticum turgidum s.l.		rachis	דגניים	Gramineae	1	1	1mm - subsample 5
HLZ-58	Elusa	Bar-Oz, Gini and Weissbrod	Daniel Fuks	2016-2018	A1	1b	section layer7		2015-02-01	Dry Sift	10	75	מלוח	Atriplex sp.	זרע?	seed?			1	1	1mm - subsample 5
HLZ-58	Elusa	Bar-Oz, Gini and Weissbrod	Daniel Fuks	2016-2018	A1	1b	section layer7		2015-02-01	Dry Sift	10	76	מתנן שעיר	Thymelaea hirsuta	ניצן/גביע	bud/	מתנניים	Thymelaceae	1	1	1mm - subsample 5
HLZ-58	Elusa	Bar-Oz, Gini and Weissbrod	Daniel Fuks	2016-2018	A1	1b	section layer7		2015-02-01	Dry Sift	10	77	מתנן שעיר	Thymelaea hirsuta	ניצן/קצה ענף	bud/	מתנניים	Thymelaceae	2	2	1mm - subsample 5
HLZ-58	Elusa	Bar-Oz, Gini and Weissbrod	Daniel Fuks	2016-2018	A1	1b	section layer7		2015-02-01	Dry Sift	10	78	מתנן שעיר	Thymelaea hirsuta	אגוזית	nutlet	מתנניים	Thymelaceae	1	1	1mm - subsample 5
HLZ-58	Elusa	Bar-Oz, Gini and Weissbrod	Daniel Fuks	2016-2018	A1	1b	section layer7		2015-02-01	Dry Sift	10	79	מתנן שעיר	Thymelaea hirsuta	עלה	leaf	מתנניים	Thymelaceae	40	40	1mm - subsample 5
HLZ-58	Elusa	Bar-Oz, Gini and Weissbrod	Daniel Fuks	2016-2018	A1	1b	section layer7		2015-02-01	Dry Sift	10	80	אשל הפרקים	Tamarix aphylla	זרע?	seed?			2	2	1mm - subsample 5
HLZ-58	Elusa	Bar-Oz, Gini and Weissbrod	Daniel Fuks	2016-2018	A1	1b	section layer7		2015-02-01	Dry Sift	10	81	?	Salsoleae?					1	1	1mm - subsample 5
HLZ-58	Elusa	Bar-Oz, Gini and Weissbrod	Daniel Fuks	2016-2018	A1	1b	section layer7		2015-02-01	Dry Sift	10	82	בלתי						2	2	1mm - subsample 5				לחבר בהמשך(יואל מכיר)
HLZ-58	Elusa	Bar-Oz, Gini and Weissbrod	Daniel Fuks	2016-2018	A1	1b	section layer7		2015-02-01	Dry Sift	10	83	בלתי - שונות								1mm - unspecified subsample #
HLZ-58	Elusa	Bar-Oz, Gini and Weissbrod	Daniel Fuks	2016-2018	A1	1b	section layer7		2015-02-01	Dry Sift	10	84	אשל הפרקים	Tamarix aphylla	זרע?	seed?			4	4	1mm - unspecified subsample #
HLZ-58	Elusa	Bar-Oz, Gini and Weissbrod	Daniel Fuks	2016-2018	A1	1b	section layer7		2015-02-01	Dry Sift	10	85	חרק						1	1	1mm - unspecified subsample #
HLZ-58	Elusa	Bar-Oz, Gini and Weissbrod	Daniel Fuks	2016-2018	A1	1b	section layer7		2015-02-01	Dry Sift	10	86	מתנן שעיר	Thymelaea hirsuta	אגוזית	nutlet	מתנניים	Thymelaceae	3	3	1mm - unspecified subsample #
HLZ-58	Elusa	Bar-Oz, Gini and Weissbrod	Daniel Fuks	2016-2018	A1	1b	section layer7		2015-02-01	Dry Sift	10	87	מתנן שעיר	Thymelaea hirsuta	עלה	leaf	מתנניים	Thymelaceae	27	27	1mm - unspecified subsample #
HLZ-58	Elusa	Bar-Oz, Gini and Weissbrod	Daniel Fuks	2016-2018	A1	1b	section layer7		2015-02-01	Dry Sift	10	88	מתנן שעיר	Thymelaea hirsuta	ניצן/קצה ענף	bud/	מתנניים	Thymelaceae	4	4	1mm - unspecified subsample #
HLZ-58	Elusa	Bar-Oz, Gini and Weissbrod	Daniel Fuks	2016-2018	A1	1b	section layer7		2015-02-01	Dry Sift	10	89	מתנן שעיר	Thymelaea hirsuta	ניצן/קצה ענף	?	מתנניים	Thymelaceae	75	75	0.5mm - sample 1
HLZ-58	Elusa	Bar-Oz, Gini and Weissbrod	Daniel Fuks	2016-2018	A1	1b	section layer7		2015-02-01	Dry Sift	10	90	אשל הפרקים	Tamarix aphylla	זרע?	seed?			1	1	0.5mm - sample 1
HLZ-58	Elusa	Bar-Oz, Gini and Weissbrod	Daniel Fuks	2016-2018	A1	1b	section layer7		2015-02-01	Dry Sift	10	91	בלתי								0.5mm - sample 1				לחבר בהמשך
HLZ-58	Elusa	Bar-Oz, Gini and Weissbrod	Daniel Fuks	2016-2018	A1	1b	section layer7		2015-02-01	Dry Sift	10	92	בלתי						2	2	0.5mm - sample 1				להמשך
HLZ-58	Elusa	Bar-Oz, Gini and Weissbrod	Daniel Fuks	2016-2018	A1	1b	section layer7		2015-02-01	Dry Sift	10	93	בלתי - שונות								0.5mm - sample 1
HLZ-58	Elusa	Bar-Oz, Gini and Weissbrod	Daniel Fuks	2016-2018	A1	1b	section layer7		2015-02-01	Dry Sift	10	94	תאנה	Ficus carica	אגוזית	nutlet	תותיים	Moraceae	1	1	0.5mm - sample 2
HLZ-58	Elusa	Bar-Oz, Gini and Weissbrod	Daniel Fuks	2016-2018	A1	1b	section layer7		2015-02-01	Dry Sift	10	95	מתנן שעיר	Thymelaea hirsuta	ניצן/גביע	bud/	מתנניים	Thymelaceae	2	2	0.5mm - sample 2
HLZ-58	Elusa	Bar-Oz, Gini and Weissbrod	Daniel Fuks	2016-2018	A1	1b	section layer7		2015-02-01	Dry Sift	10	96	דגני		גרגיר?	grain?	דגניים	Gramineae	5	5	0.5mm - sample 2
HLZ-58	Elusa	Bar-Oz, Gini and Weissbrod	Daniel Fuks	2016-2018	A1	1b	section layer7		2015-02-01	Dry Sift	10	97	מתנן שעיר	Thymelaea hirsuta	אגוזית	nutlet	מתנניים	Thymelaceae	30	30	0.5mm - sample 2				יואל ראה
HLZ-58	Elusa	Bar-Oz, Gini and Weissbrod	Daniel Fuks	2016-2018	A1	1b	section layer7		2015-02-15	Dry Sift	10	98	בלתי - שונות								0.5mm - sample 2				יואל ראה
HLZ-58	Elusa	Bar-Oz, Gini and Weissbrod	Daniel Fuks	2016-2018	A1	1b	section layer7		2015-02-15	Dry Sift	10	99	מתנן שעיר	Thymelaea hirsuta	גביע פורג		מתננים	Thymelaceae	1	1	0.5mm - sample 2
HLZ-58	Elusa	Bar-Oz, Gini and Weissbrod	Daniel Fuks	2016-2018	A1	1b	section layer7		2015-02-01	Dry Sift	10	100	בלתי								0.5mm - sample 2				לחבר בהמשך
HLZ-58	Elusa	Bar-Oz, Gini and Weissbrod	Daniel Fuks	2016-2018	A1	1b	section layer7		2015-02-01	Dry Sift	10	101	מתנן שעיר	Thymelaea hirsuta	עלה	leaf	מתנניים	Thymelaceae	80	80	0.5mm - sample 3 - trial 1
HLZ-58	Elusa	Bar-Oz, Gini and Weissbrod	Daniel Fuks	2016-2018	A1	1b	section layer7		2015-02-01	Dry Sift	10	102	מתנן שעיר	Thymelaea hirsuta	שבר אגוזית	nutlet fragment	מתנניים	Thymelaceae	2	2	0.5mm - sample 3 - trial 1
HLZ-58	Elusa	Bar-Oz, Gini and Weissbrod	Daniel Fuks	2016-2018	A1	1b	section layer7		2015-02-01	Dry Sift	10	103	מתנן שעיר	Thymelaea hirsuta	ניצן/גביע	bud/	מתנניים	Thymelaceae	4	4	0.5mm - sample 3 - trial 1
HLZ-58	Elusa	Bar-Oz, Gini and Weissbrod	Daniel Fuks	2016-2018	A1	1b	section layer7		2015-02-01	Dry Sift	10	104	מלען		שברי מלען						0.5mm - sample 3 - trial 1
HLZ-58	Elusa	Bar-Oz, Gini and Weissbrod	Daniel Fuks	2016-2018	A1	1b	section layer7		2015-02-01	Dry Sift	10	105	בלתי - שונות								0.5mm - sample 3 - trial 1
HLZ-58	Elusa	Bar-Oz, Gini and Weissbrod	Daniel Fuks	2016-2018	A1	1b	section layer7		2015-02-01	Dry Sift	10	106	בלתי						5	5	0.5mm - sample 3 - trial 1
HLZ-58	Elusa	Bar-Oz, Gini and Weissbrod	Daniel Fuks	2016-2018	A1	1b	section layer7		2015-02-01	Dry Sift	10	107	דגני		גרגיר	grain	דגניים	Gramineae	1	1	0.5mm - sample 3 - trial 1
HLZ-58	Elusa	Bar-Oz, Gini and Weissbrod	Daniel Fuks	2016-2018	A1	1b	section layer7		2015-02-01	Dry Sift	10	108	מתנן שעיר	Thymelaea hirsuta	ניצן/גביע	bud/	מתנניים	Thymelaceae	2	2	0.5mm - sample 3 - trial 2
HLZ-58	Elusa	Bar-Oz, Gini and Weissbrod	Daniel Fuks	2016-2018	A1	1b	section layer7		2015-02-01	Dry Sift	10	109	מתנן שעיר	Thymelaea hirsuta	עלה	leaf	מתנניים	Thymelaceae	65	65	0.5mm - sample 3 - trial 2
HLZ-58	Elusa	Bar-Oz, Gini and Weissbrod	Daniel Fuks	2016-2018	A1	1b	section layer7		2015-02-15	Dry Sift	10	110	אשל הפרקים	Tamarix aphylla	זרע?	seed?			2	2	0.5mm - sample 3 - trial 2
HLZ-58	Elusa	Bar-Oz, Gini and Weissbrod	Daniel Fuks	2016-2018	A1	1b	section layer7		2015-02-15	Dry Sift	10	111	מלען		שברי מלען						0.5mm - sample 3 - trial 2
HLZ-58	Elusa	Bar-Oz, Gini and Weissbrod	Daniel Fuks	2016-2018	A1	1b	section layer7		2015-02-01	Dry Sift	10	112	בלתי - שונות								0.5mm - sample 3 - trial 2
HLZ-58	Elusa	Bar-Oz, Gini and Weissbrod	Daniel Fuks	2016-2018	A1	1b	section layer7		2015-02-01	Dry Sift	10	113	דרדר		זרע?				1	1	0.5mm - sample 3 - trial 3				להגדרה
HLZ-58	Elusa	Bar-Oz, Gini and Weissbrod	Daniel Fuks	2016-2018	A1	1b	section layer7		2015-02-01	Dry Sift	10	114	מתנן שעיר	Thymelaea hirsuta	עלה	leaf	מתנניים	Thymelaceae	40	40	0.5mm - sample 3 - trial 3
HLZ-58	Elusa	Bar-Oz, Gini and Weissbrod	Daniel Fuks	2016-2018	A1	1b	section layer7		2015-02-01	Dry Sift	10	115	מתנן שעיר	Thymelaea hirsuta	ניצן/גביע	bud/	מתנניים	Thymelaceae	1	1	0.5mm - sample 3 - trial 3
HLZ-58	Elusa	Bar-Oz, Gini and Weissbrod	Daniel Fuks	2016-2018	A1	1b	section layer7		2015-02-01	Dry Sift	10	116	בלתי - שונות								0.5mm - sample 3 - trial 3
HLZ-58	Elusa	Bar-Oz, Gini and Weissbrod	Daniel Fuks	2016-2018	A1	1b	section layer7		2015-02-01	Dry Sift	10	117	מתנן שעיר	Thymelaea hirsuta	ניצן/גביע	bud/	מתנניים	Thymelaceae	1	1	0.5mm - sample 3 - trial 4
HLZ-58	Elusa	Bar-Oz, Gini and Weissbrod	Daniel Fuks	2016-2018	A1	1b	section layer7		2015-02-01	Dry Sift	10	118	מתנן שעיר	Thymelaea hirsuta	עלה	leaf	מתנניים	Thymelaceae	25	25	0.5mm - sample 3 - trial 4
HLZ-58	Elusa	Bar-Oz, Gini and Weissbrod	Daniel Fuks	2016-2018	A1	1b	section layer7		2015-02-01	Dry Sift	10	119	אשל הפרקים	Tamarix aphylla	זרע?	seed?			2	2	0.5mm - sample 3 - trial 4
HLZ-58	Elusa	Bar-Oz, Gini and Weissbrod	Daniel Fuks	2016-2018	A1	1b	section layer7		2015-02-01	Dry Sift	10	120	אהל מצוי								0.5mm - sample 3 - trial 4
HLZ-58	Elusa	Bar-Oz, Gini and Weissbrod	Daniel Fuks	2016-2018	A1	1b	section layer7		2015-02-01	Dry Sift	10	121	בלתי - שונות								0.5mm - sample 3 - trial 4
HLZ-59	Elusa	Bar-Oz, Gini and Weissbrod	Daniel Fuks	2016-2018	A4	4	4/07a	69b	2015-02-01	Dry Sift	3	1	שעורה	Hordeum vulgare	גרגיר	grain	דגניים	Gramineae	62	62	2
HLZ-59	Elusa	Bar-Oz, Gini and Weissbrod	Daniel Fuks	2016-2018	A4	4	4/07a	69b	2015-02-01	Dry Sift	3	2	חיטה	Triticum	גרגיר	grain	דגניים	Gramineae	7	7	2
HLZ-59	Elusa	Bar-Oz, Gini and Weissbrod	Daniel Fuks	2016-2018	A4	4	4/07a	69b	2015-02-01	Dry Sift	3	3	חיטה/שעורה	Hordeum cf. Triticum	גרגיר	grain	דגניים	Gramineae	14	14	2
HLZ-59	Elusa	Bar-Oz, Gini and Weissbrod	Daniel Fuks	2016-2018	A4	4	4/07a	69b	2015-02-01	Dry Sift	3	4	גפן	Vitis vinifera	חרצן	pip	גפניים	Vitaceae	7	7	2
HLZ-59	Elusa	Bar-Oz, Gini and Weissbrod	Daniel Fuks	2016-2018	A4	4	4/07a	69b	2015-02-01	Dry Sift	3	5	גפן	Vitis vinifera	עוקץ	pedicel	גפניים	Vitaceae	5	5	2
HLZ-59	Elusa	Bar-Oz, Gini and Weissbrod	Daniel Fuks	2016-2018	A4	4	4/07a	69b	2015-02-15	Dry Sift	3	6			פרקי דגן	culm nodes	דגניים	Gramineae	38	38	2
HLZ-59	Elusa	Bar-Oz, Gini and Weissbrod	Daniel Fuks	2016-2018	A4	4	4/07a	69b	2015-02-15	Dry Sift	3	7	עדשה תרבותית	Lens culinaris	זרע	seed	פרפרניים	Fabaceae	6	6	2				השתמרות גרועה, זיהוי קשה
HLZ-59	Elusa	Bar-Oz, Gini and Weissbrod	Daniel Fuks	2016-2018	A4	4	4/07a	69b	2015-02-01	Dry Sift	3	8	בלתי				פרפרניים?	Fabaceae?	5	5	2
HLZ-59	Elusa	Bar-Oz, Gini and Weissbrod	Daniel Fuks	2016-2018	A4	4	4/07a	69b	2015-02-01	Dry Sift	3	9	בקיית הכרשינה	Vicia ervilia	זרע	seed	פרפרניים	Fabaceae	2	2	2
HLZ-59	Elusa	Bar-Oz, Gini and Weissbrod	Daniel Fuks	2016-2018	A4	4	4/07a	69b	2015-02-01	Dry Sift	3	10	תמר מצוי	Phoenix dactylifera					1	1	2				הופרד למסירה לגיל זאבי
HLZ-59	Elusa	Bar-Oz, Gini and Weissbrod	Daniel Fuks	2016-2018	A4	4	4/07a	69b	2015-02-01	Dry Sift	3	11	תמר מצוי?		קליפות						2
HLZ-59	Elusa	Bar-Oz, Gini and Weissbrod	Daniel Fuks	2016-2018	A4	4	4/07a	69b	2015-02-01	Dry Sift	3	12	בלתי		קליפת גלעין?			Rosaceae?	1	1	2				קליפת פרי כלשהו
HLZ-59	Elusa	Bar-Oz, Gini and Weissbrod	Daniel Fuks	2016-2018	A4	4	4/07a	69b	2015-02-01	Dry Sift	3	13	תאנה	Ficus carica	אגוזית בציפה/גלל				1	1	2
HLZ-59	Elusa	Bar-Oz, Gini and Weissbrod	Daniel Fuks	2016-2018	A4	4	4/07a	69b	2015-02-01	Dry Sift	3	14	שיטה/ינבוט	Acacia/Prosopis	שבר זרע	seed fragment	שיטיים		1	1	2
HLZ-59	Elusa	Bar-Oz, Gini and Weissbrod	Daniel Fuks	2016-2018	A4	4	4/07a	69b	2015-02-01	Dry Sift	3	15	גלל								2
HLZ-59	Elusa	Bar-Oz, Gini and Weissbrod	Daniel Fuks	2016-2018	A4	4	4/07a	69b	2015-02-01	Dry Sift	3	16			שברי גרגיר	grain fragments	דגניים	Gramineae			2
HLZ-59	Elusa	Bar-Oz, Gini and Weissbrod	Daniel Fuks	2016-2018	A4	4	4/07a	69b	2015-02-01	Dry Sift	3	17	בלתי-שונות								2
HLZ-59	Elusa	Bar-Oz, Gini and Weissbrod	Daniel Fuks	2016-2018	A4	4	4/07a	69b	2015-02-01	Dry Sift	3	18	דג		קשקשים						2
HLZ-6	Elusa	Bar-Oz, Gini and Weissbrod	Daniel Fuks, Yael Slasky	2015	A1	1	1/03a	13	2015-02-01	Wet Sieve Picking	8	1	חיטה/שעורה	Hordeum	גרגיר	grain	דגניים	Gramineae	1	1			כן
HLZ-6	Elusa	Bar-Oz, Gini and Weissbrod	Daniel Fuks, Yael Slasky	2015	A1	1	1/03a	13	2015-02-01	Wet Sieve Picking		2	זית	Olea europaea	גלעין	pit	זיתיים	Oleaceae	1	1			כן
HLZ-6	Elusa	Bar-Oz, Gini and Weissbrod	Daniel Fuks, Yael Slasky	2015	A1	1	1/03a	13	2015-02-01	Wet Sieve Picking		3	טופח	Lathyrus sect. cicercula	זרע	seed	פרפרניים	Fabaceae	1	1			כן		Lathyrus cicera or L. blepharicarpus		בעיה שלא רואים טבורית ועדשה
HLZ-6	Elusa	Bar-Oz, Gini and Weissbrod	Daniel Fuks, Yael Slasky	2015	A1	1	1/03a	13	2015-02-01	Wet Sieve Picking		4	בלתי מזוהה
HLZ-60	Elusa	Bar-Oz, Gini and Weissbrod	Daniel Fuks	2016-2018	A4	4	4/07b	70a	2015-02-01	Dry Sift	3	1	שעורה	Hordeum vulgare	גרגיר	grain	דגניים	Gramineae	30	30	2
HLZ-60	Elusa	Bar-Oz, Gini and Weissbrod	Daniel Fuks	2016-2018	A4	4	4/07b	70a	2015-02-01	Dry Sift	3	2	חיטה	Triticum	גרגיר	grain	דגניים	Gramineae	3	3
HLZ-60	Elusa	Bar-Oz, Gini and Weissbrod	Daniel Fuks	2016-2018	A4	4	4/07b	70a	2015-02-01	Dry Sift	3	3	חיטה/שעורה	Hordeum cf. Triticum	גרגיר	grain	דגניים	Gramineae	12	12
HLZ-60	Elusa	Bar-Oz, Gini and Weissbrod	Daniel Fuks	2016-2018	A4	4	4/07b	70a	2015-02-01	Dry Sift	3	4	גפן	Vitis vinifera	חרצן	pip	גפניים	Vitaceae	6	6
HLZ-60	Elusa	Bar-Oz, Gini and Weissbrod	Daniel Fuks	2016-2018	A4	4	4/07b	70a	2015-02-01	Dry Sift	3	5			פרקי דגן	culm nodes	דגניים	Gramineae	19	19
HLZ-60	Elusa	Bar-Oz, Gini and Weissbrod	Daniel Fuks	2016-2018	A4	4	4/07b	70a	2015-02-01	Dry Sift	3	6	שעורה	Hordeum vulgare	פרק ציר שיבולת	rachis fragment	דגניים	Gramineae	2	2
HLZ-60	Elusa	Bar-Oz, Gini and Weissbrod	Daniel Fuks	2016-2018	A4	4	4/07b	70a	2015-02-01	Dry Sift	3	7	עדשה?	Lens culinaris?	פסיג	cotyledon	פרפרניים	Fabaceae	1	1
HLZ-60	Elusa	Bar-Oz, Gini and Weissbrod	Daniel Fuks	2016-2018	A4	4	4/07b	70a	2015-02-01	Dry Sift	3	8	בקיית הכרשינה	Vicia ervilia	זרע	seed	פרפרניים	Fabaceae	2	2
HLZ-60	Elusa	Bar-Oz, Gini and Weissbrod	Daniel Fuks	2016-2018	A4	4	4/07b	70a	2015-02-01	Dry Sift	3	9			קרקפת	capitulum	מורכבים	Asteraceae	1	1
HLZ-60	Elusa	Bar-Oz, Gini and Weissbrod	Daniel Fuks	2016-2018	A4	4	4/07b	70a	2015-02-01	Dry Sift	3	10	מתנן שעיר?	Thymelaea hirsuta?	עלה?	leaf?	מתנניים?	Thymelaceae?	1	1
HLZ-60	Elusa	Bar-Oz, Gini and Weissbrod	Daniel Fuks	2016-2018	A4	4	4/07b	70a	2015-02-01	Dry Sift	3	11	בלתי
HLZ-60	Elusa	Bar-Oz, Gini and Weissbrod	Daniel Fuks	2016-2018	A4	4	4/07b	70a	2015-02-01	Dry Sift	3	12	תמר מצוי?		קליפות
HLZ-60	Elusa	Bar-Oz, Gini and Weissbrod	Daniel Fuks	2016-2018	A4	4	4/07b	70a	2015-02-01	Dry Sift	3	13	קטנית		זרע	seed	פרפרניים	Fabaceae			לחבר בהמשך
HLZ-60	Elusa	Bar-Oz, Gini and Weissbrod	Daniel Fuks	2016-2018	A4	4	4/07b	70a	2015-02-01	Dry Sift	3	14	תאנה?		אגוזיות בציפה														אולי דרך גללים
HLZ-60	Elusa	Bar-Oz, Gini and Weissbrod	Daniel Fuks	2016-2018	A4	4	4/07b	70a	2015-02-01	Dry Sift	3	15	דגן?
HLZ-60	Elusa	Bar-Oz, Gini and Weissbrod	Daniel Fuks	2016-2018	A4	4	4/07b	70a	2015-02-01	Dry Sift	3	16	בלתי-שונות
HLZ-60	Elusa	Bar-Oz, Gini and Weissbrod	Daniel Fuks	2016-2018	A4	4	4/07b	70a	2015-02-01	Dry Sift	3	17	בלתי		ענפים
HLZ-60	Elusa	Bar-Oz, Gini and Weissbrod	Daniel Fuks	2016-2018	A4	4	4/07b	70a	2015-02-01	Dry Sift	3	18	גלל
HLZ-60	Elusa	Bar-Oz, Gini and Weissbrod	Daniel Fuks	2016-2018	A4	4	4/07b	70a	2015-02-01	Dry Sift	3	19			שברי גרגיר	grain fragments	דגניים	Gramineae
HLZ-60	Elusa	Bar-Oz, Gini and Weissbrod	Daniel Fuks	2016-2018	A4	4	4/07b	70a	2015-02-01	Dry Sift	3	20	דג		קשקשים
HLZ-61	Elusa	Bar-Oz, Gini and Weissbrod	Daniel Fuks	2016-2018	A4	4	4/07b	70b	2015-02-01	Dry Sift	3	1	שעורה	Hordeum vulgare	גרגיר	grain	דגניים	Gramineae	39	39
HLZ-61	Elusa	Bar-Oz, Gini and Weissbrod	Daniel Fuks	2016-2018	A4	4	4/07b	70b	2015-02-01	Dry Sift	3	2	חיטה	Triticum	גרגיר	grain	דגניים	Gramineae	9	9
HLZ-61	Elusa	Bar-Oz, Gini and Weissbrod	Daniel Fuks	2016-2018	A4	4	4/07b	70b	2015-02-15	Dry Sift	3	3	חיטה/שעורה	Hordeum cf. Triticum	גרגיר	grain	דגניים	Gramineae	14	14
HLZ-61	Elusa	Bar-Oz, Gini and Weissbrod	Daniel Fuks	2016-2018	A4	4	4/07b	70b	2015-02-15	Dry Sift	3	4	גפן	Vitis vinifera	חרצן	pip	גפניים	Vitaceae	6	6
HLZ-61	Elusa	Bar-Oz, Gini and Weissbrod	Daniel Fuks	2016-2018	A4	4	4/07b	70b	2015-02-01	Dry Sift	3	5	שעורה/זון		גרגיר	grain	דגניים	Gramineae	3	3
HLZ-61	Elusa	Bar-Oz, Gini and Weissbrod	Daniel Fuks	2016-2018	A4	4	4/07b	70b	2015-02-01	Dry Sift	3	6			פרקי דגן	culm nodes	דגניים	Gramineae	39	39
HLZ-61	Elusa	Bar-Oz, Gini and Weissbrod	Daniel Fuks	2016-2018	A4	4	4/07b	70b	2015-02-01	Dry Sift	3	7	עדשה תרבותית	Lens culinaris	זרע	seed	פרפרניים	Fabaceae	6	6
HLZ-61	Elusa	Bar-Oz, Gini and Weissbrod	Daniel Fuks	2016-2018	A4	4	4/07b	70b	2015-02-01	Dry Sift	3	8	בקיית הכרשינה	Vicia ervilia	פסיג	cotyledon	פרפרניים	Fabaceae	1	1
HLZ-61	Elusa	Bar-Oz, Gini and Weissbrod	Daniel Fuks	2016-2018	A4	4	4/07b	70b	2015-02-01	Dry Sift	3	9	בקיית הכלאים/המשי	Vicia hybrida/sericocarpa	זרע	seed	פרפרניים	Fabaceae	1	1					מח' 2 עמ' 162
HLZ-61	Elusa	Bar-Oz, Gini and Weissbrod	Daniel Fuks	2016-2018	A4	4	4/07b	70b	2015-02-01	Dry Sift	3	10	חיטה טטרפלוידית	Triticum turgidum s.l.	פרק ציר שיבולת	rachis fragment	דגניים	Gramineae	2	2
HLZ-61	Elusa	Bar-Oz, Gini and Weissbrod	Daniel Fuks	2016-2018	A4	4	4/07b	70b	2015-02-01	Dry Sift	3	11	זית		שבר קשווה				1	1
HLZ-61	Elusa	Bar-Oz, Gini and Weissbrod	Daniel Fuks	2016-2018	A4	4	4/07b	70b	2015-02-01	Dry Sift	3	12	תמר מצוי	Phoenix dactylifera	שבר גלעין	stone fragment	דקליים	Palmae	1	1
HLZ-61	Elusa	Bar-Oz, Gini and Weissbrod	Daniel Fuks	2016-2018	A4	4	4/07b	70b	2015-02-01	Dry Sift	3	13	פיקוס התאנה	Ficus carica	ציפה עם אגוזיות		תותיים	Moraceae
HLZ-61	Elusa	Bar-Oz, Gini and Weissbrod	Daniel Fuks	2016-2018	A4	4	4/07b	70b	2015-02-01	Dry Sift	3	14	בוצין?	Verbascum sp.?
HLZ-61	Elusa	Bar-Oz, Gini and Weissbrod	Daniel Fuks	2016-2018	A4	4	4/07b	70b	2015-02-15	Dry Sift	3	15	בלתי
HLZ-61	Elusa	Bar-Oz, Gini and Weissbrod	Daniel Fuks	2016-2018	A4	4	4/07b	70b	2015-02-15	Dry Sift	3	16	בלתי-שונות
HLZ-61	Elusa	Bar-Oz, Gini and Weissbrod	Daniel Fuks	2016-2018	A4	4	4/07b	70b	2015-02-01	Dry Sift	3	17	גלל
HLZ-61	Elusa	Bar-Oz, Gini and Weissbrod	Daniel Fuks	2016-2018	A4	4	4/07b	70b	2015-02-01	Dry Sift	3	18			שברי גרגיר	grain fragments	דגניים	Gramineae
HLZ-61	Elusa	Bar-Oz, Gini and Weissbrod	Daniel Fuks	2016-2018	A4	4	4/07b	70b	2015-02-01	Dry Sift	3	19	דג		קשקשים
HLZ-62	Elusa	Bar-Oz, Gini and Weissbrod	Daniel Fuks	2016-2018	A4	4	4/07d	72a	2015-02-01	Dry Sift	3	1	שעורה	Hordeum vulgare	גרגיר	grain	דגניים	Gramineae	37	37
HLZ-62	Elusa	Bar-Oz, Gini and Weissbrod	Daniel Fuks	2016-2018	A4	4	4/07d	72a	2015-02-01	Dry Sift	3	2	חיטה	Triticum	גרגיר	grain	דגניים	Gramineae	4	4
HLZ-62	Elusa	Bar-Oz, Gini and Weissbrod	Daniel Fuks	2016-2018	A4	4	4/07d	72a	2015-02-01	Dry Sift	3	3	חיטה/שעורה	Hordeum cf. Triticum	גרגיר	grain	דגניים	Gramineae	5	5
HLZ-62	Elusa	Bar-Oz, Gini and Weissbrod	Daniel Fuks	2016-2018	A4	4	4/07d	72a	2015-02-01	Dry Sift	3	4	גפן	Vitis vinifera	חרצן	pip	גפניים	Vitaceae	3	3
HLZ-62	Elusa	Bar-Oz, Gini and Weissbrod	Daniel Fuks	2016-2018	A4	4	4/07d	72a	2015-02-01	Dry Sift	3	5	שעורה?		גרגיר	grain	דגניים	Gramineae	1	1
HLZ-62	Elusa	Bar-Oz, Gini and Weissbrod	Daniel Fuks	2016-2018	A4	4	4/07d	72a	2015-02-01	Dry Sift	3	6			פרקי דגן	culm nodes	דגניים	Gramineae	26	26
HLZ-62	Elusa	Bar-Oz, Gini and Weissbrod	Daniel Fuks	2016-2018	A4	4	4/07d	72a	2015-02-01	Dry Sift	3	7	עדשה תרבותית	Lens culinaris	זרע	seed	פרפרניים	Fabaceae	5	5
HLZ-62	Elusa	Bar-Oz, Gini and Weissbrod	Daniel Fuks	2016-2018	A4	4	4/07d	72a	2015-02-01	Dry Sift	3	8	טופח	Lathyrus sect. cicercula	פסיג	cotyledon	פרפרניים	Fabaceae	1	1
HLZ-62	Elusa	Bar-Oz, Gini and Weissbrod	Daniel Fuks	2016-2018	A4	4	4/07d	72a	2015-02-01	Dry Sift	3	9	בקיים	Vicieae	זרע	seed	פרפרניים	Fabaceae	1	1
HLZ-62	Elusa	Bar-Oz, Gini and Weissbrod	Daniel Fuks	2016-2018	A4	4	4/07d	72a	2015-02-01	Dry Sift	3	10	אמיך קוצני?						1	1
HLZ-62	Elusa	Bar-Oz, Gini and Weissbrod	Daniel Fuks	2016-2018	A4	4	4/07d	72a	2015-02-01	Dry Sift	3	11	תמר??
HLZ-62	Elusa	Bar-Oz, Gini and Weissbrod	Daniel Fuks	2016-2018	A4	4	4/07d	72a	2015-02-01	Dry Sift	3	12	בלתי
HLZ-62	Elusa	Bar-Oz, Gini and Weissbrod	Daniel Fuks	2016-2018	A4	4	4/07d	72a	2015-02-15	Dry Sift	3	13	בלתי-שונות
HLZ-62	Elusa	Bar-Oz, Gini and Weissbrod	Daniel Fuks	2016-2018	A4	4	4/07d	72a	2015-02-15	Dry Sift	3	14	גלל
HLZ-62	Elusa	Bar-Oz, Gini and Weissbrod	Daniel Fuks	2016-2018	A4	4	4/07d	72a	2015-02-01	Dry Sift	3	15			שברי גרגיר	grain fragments	דגניים	Gramineae
HLZ-62	Elusa	Bar-Oz, Gini and Weissbrod	Daniel Fuks	2016-2018	A4	4	4/07d	72a	2015-02-01	Dry Sift	3	16	דג		קשקשים
HLZ-63	Elusa	Bar-Oz, Gini and Weissbrod	Daniel Fuks	2016-2018	A4	4	4/07d	72b	2015-02-01	Dry Sift	check	1	שעורה	Hordeum vulgare	גרגיר	grain	דגניים	Gramineae	21	21
HLZ-63	Elusa	Bar-Oz, Gini and Weissbrod	Daniel Fuks	2016-2018	A4	4	4/07d	72b	2015-02-01	Dry Sift	3	2	חיטה	Triticum	גרגיר	grain	דגניים	Gramineae	1	1
HLZ-63	Elusa	Bar-Oz, Gini and Weissbrod	Daniel Fuks	2016-2018	A4	4	4/07d	72b	2015-02-01	Dry Sift	3	3	חיטה/שעורה	Hordeum cf. Triticum	גרגיר	grain	דגניים	Gramineae	7	7
HLZ-63	Elusa	Bar-Oz, Gini and Weissbrod	Daniel Fuks	2016-2018	A4	4	4/07d	72b	2015-02-01	Dry Sift	3	4	גפן	Vitis vinifera	חרצן	pip	גפניים	Vitaceae	8	8
HLZ-63	Elusa	Bar-Oz, Gini and Weissbrod	Daniel Fuks	2016-2018	A4	4	4/07d	72b	2015-02-01	Dry Sift	3	5	גפן	Vitis vinifera	עוקץ	pedicel	גפניים	Vitaceae	1	1
HLZ-63	Elusa	Bar-Oz, Gini and Weissbrod	Daniel Fuks	2016-2018	A4	4	4/07d	72b	2015-02-01	Dry Sift	3	6			פרקי דגן	culm nodes	דגניים	Gramineae	11	11
HLZ-63	Elusa	Bar-Oz, Gini and Weissbrod	Daniel Fuks	2016-2018	A4	4	4/07d	72b	2015-02-01	Dry Sift	3	7	עדשה?	Lens culinaris?	זרע	seed	פרפרניים	Fabaceae
HLZ-63	Elusa	Bar-Oz, Gini and Weissbrod	Daniel Fuks	2016-2018	A4	4	4/07d	72b	2015-02-01	Dry Sift	3	8	בקיים	Vicieae	זרע	seed	פרפרניים	Fabaceae	1	1					ירוק!
HLZ-63	Elusa	Bar-Oz, Gini and Weissbrod	Daniel Fuks	2016-2018	A4	4	4/07d	72b	2015-02-01	Dry Sift	3	9	זית		שבר גלעין	stone fragment			1	1
HLZ-63	Elusa	Bar-Oz, Gini and Weissbrod	Daniel Fuks	2016-2018	A4	4	4/07d	72b	2015-02-01	Dry Sift	3	10	תאנה	Ficus carica	אגוזיות בציפה														אולי דרך גללים
HLZ-63	Elusa	Bar-Oz, Gini and Weissbrod	Daniel Fuks	2016-2018	A4	4	4/07d	72b	2015-02-01	Dry Sift	3	11	בלתי
HLZ-63	Elusa	Bar-Oz, Gini and Weissbrod	Daniel Fuks	2016-2018	A4	4	4/07d	72b	2015-02-01	Dry Sift	3	12	רצנטי בלתי
HLZ-63	Elusa	Bar-Oz, Gini and Weissbrod	Daniel Fuks	2016-2018	A4	4	4/07d	72b	2015-02-01	Dry Sift	3	13	בלתי-שונות
HLZ-63	Elusa	Bar-Oz, Gini and Weissbrod	Daniel Fuks	2016-2018	A4	4	4/07d	72b	2015-02-01	Dry Sift	3	14	גלל
HLZ-63	Elusa	Bar-Oz, Gini and Weissbrod	Daniel Fuks	2016-2018	A4	4	4/07d	72b	2015-02-01	Dry Sift	3	15			שברי גרגיר	grain fragments	דגניים	Gramineae
HLZ-63	Elusa	Bar-Oz, Gini and Weissbrod	Daniel Fuks	2016-2018	A4	4	4/07d	72b	2015-02-01	Dry Sift	3	16	דג		קשקשים
HLZ-64	Elusa	Bar-Oz, Gini and Weissbrod	Daniel Fuks	2016-2018	A4	4	4/06a + 4/07a	60+69b	2015-02-01	Dry Sift	3	1	שעורה	Hordeum vulgare	גרגיר	grain	דגניים	Gramineae	82	82
HLZ-64	Elusa	Bar-Oz, Gini and Weissbrod	Daniel Fuks	2016-2018	A4	4	4/06a + 4/07a	60+69b	2015-02-01	Dry Sift	3	2	חיטה	Triticum	גרגיר	grain	דגניים	Gramineae	4	4
HLZ-64	Elusa	Bar-Oz, Gini and Weissbrod	Daniel Fuks	2016-2018	A4	4	4/06a + 4/07a	60+69b	2015-02-01	Dry Sift	3	3	חיטה/שעורה	Hordeum cf. Triticum	גרגיר	grain	דגניים	Gramineae	14	14
HLZ-64	Elusa	Bar-Oz, Gini and Weissbrod	Daniel Fuks	2016-2018	A4	4	4/06a + 4/07a	60+69b	2015-02-01	Dry Sift	3	4	גפן	Vitis vinifera	חרצן	pip	גפניים	Vitaceae	7	7
HLZ-64	Elusa	Bar-Oz, Gini and Weissbrod	Daniel Fuks	2016-2018	A4	4	4/06a + 4/07a	60+69b	2015-02-01	Dry Sift	3	5	גפן	Vitis vinifera	עוקץ	pedicel	גפניים	Vitaceae	3	3
HLZ-64	Elusa	Bar-Oz, Gini and Weissbrod	Daniel Fuks	2016-2018	A4	4	4/06a + 4/07a	60+69b	2015-02-01	Dry Sift	3	6			פרקי דגן	culm nodes	דגניים	Gramineae	33	33
HLZ-64	Elusa	Bar-Oz, Gini and Weissbrod	Daniel Fuks	2016-2018	A4	4	4/06a + 4/07a	60+69b	2015-02-01	Dry Sift	3	7	עדשה תרבותית	Lens culinaris	זרע	seed	פרפרניים	Fabaceae	6	6
HLZ-64	Elusa	Bar-Oz, Gini and Weissbrod	Daniel Fuks	2016-2018	A4	4	4/06a + 4/07a	60+69b	2015-02-01	Dry Sift	3	8	בקיית הכרשינה	Vicia ervilia	פסיג	cotyledon	פרפרניים	Fabaceae	3	3
HLZ-64	Elusa	Bar-Oz, Gini and Weissbrod	Daniel Fuks	2016-2018	A4	4	4/06a + 4/07a	60+69b	2015-02-01	Dry Sift	3	9	גרגרנית החילבה	Trigonella foenum-graecum	זרע	seed	פרפרניים	Fabaceae	1	1									יואל אישר ואני עברתי על כל הקדד והגרגרנית כדי לוודא שאין מועמדים אחרים
HLZ-64	Elusa	Bar-Oz, Gini and Weissbrod	Daniel Fuks	2016-2018	A4	4	4/06a + 4/07a	60+69b	2015-02-01	Dry Sift	3	10	בקיים		זרע	seed	פרפרניים	Fabaceae	2	2
HLZ-64	Elusa	Bar-Oz, Gini and Weissbrod	Daniel Fuks	2016-2018	A4	4	4/06a + 4/07a	60+69b	2015-02-01	Dry Sift	3	11	שעורה שש-טורית	Hordeum vulgare subsp. hexastichum	פרק ציר שיבולת	rachis fragment	דגניים	Gramineae	1	1
HLZ-64	Elusa	Bar-Oz, Gini and Weissbrod	Daniel Fuks	2016-2018	A4	4	4/06a + 4/07a	60+69b	2015-02-01	Dry Sift	3	12	חיטה טטרפלוידית	Triticum turgidum s.l.	פרק ציר שיבולת	rachis fragment	דגניים	Gramineae	2	2
HLZ-64	Elusa	Bar-Oz, Gini and Weissbrod	Daniel Fuks	2016-2018	A4	4	4/06a + 4/07a	60+69b	2015-02-01	Dry Sift	3	13	תמר מצוי	Phoenix dactylifera	שבר גלעין	stone fragment	דקליים	Palmae	1	1
HLZ-64	Elusa	Bar-Oz, Gini and Weissbrod	Daniel Fuks	2016-2018	A4	4	4/06a + 4/07a	60+69b	2015-02-01	Dry Sift	3	14	תאנה?		אגוזיות בציפה														אולי דרך גללים
HLZ-64	Elusa	Bar-Oz, Gini and Weissbrod	Daniel Fuks	2016-2018	A4	4	4/06a + 4/07a	60+69b	2015-02-01	Dry Sift	3	15	שיטת היאור	Acacia nilotica	חצי זרע		שיטיים	Mimosaceae	1	1
HLZ-64	Elusa	Bar-Oz, Gini and Weissbrod	Daniel Fuks	2016-2018	A4	4	4/06a + 4/07a	60+69b	2015-02-01	Dry Sift	3	16	בלתי-שונות
HLZ-64	Elusa	Bar-Oz, Gini and Weissbrod	Daniel Fuks	2016-2018	A4	4	4/06a + 4/07a	60+69b	2015-02-01	Dry Sift	3	17	גלל
HLZ-65	Elusa	Bar-Oz, Gini and Weissbrod	Daniel Fuks	2016-2018	A4	4	4/06a + 4/07a	60+69d	2015-02-01	Dry Sift	3	1	שעורה	Hordeum vulgare	גרגיר	grain	דגניים	Gramineae	47	47
HLZ-65	Elusa	Bar-Oz, Gini and Weissbrod	Daniel Fuks	2016-2018	A4	4	4/06a + 4/07a	60+69d	2015-02-01	Dry Sift	3	2	חיטה	Triticum	גרגיר	grain	דגניים	Gramineae	1	1
HLZ-65	Elusa	Bar-Oz, Gini and Weissbrod	Daniel Fuks	2016-2018	A4	4	4/06a + 4/07a	60+69d	2015-02-15	Dry Sift	3	3	חיטה/שעורה	Hordeum cf. Triticum	גרגיר	grain	דגניים	Gramineae	9	9
HLZ-65	Elusa	Bar-Oz, Gini and Weissbrod	Daniel Fuks	2016-2018	A4	4	4/06a + 4/07a	60+69d	2015-02-15	Dry Sift	3	4	גפן	Vitis vinifera	חרצן	pip	גפניים	Vitaceae	2	2
HLZ-65	Elusa	Bar-Oz, Gini and Weissbrod	Daniel Fuks	2016-2018	A4	4	4/06a + 4/07a	60+69d	2015-02-01	Dry Sift	3	5			פרקי דגן	culm nodes	דגניים	Gramineae	31	31
HLZ-65	Elusa	Bar-Oz, Gini and Weissbrod	Daniel Fuks	2016-2018	A4	4	4/06a + 4/07a	60+69d	2015-02-01	Dry Sift	3	6			שורשי דגן	roots	דגניים	Gramineae	6	6
HLZ-65	Elusa	Bar-Oz, Gini and Weissbrod	Daniel Fuks	2016-2018	A4	4	4/06a + 4/07a	60+69d	2015-02-01	Dry Sift	3	7	עדשה?	Lens culinaris??	זרע	seed	פרפרניים	Fabaceae	2	2									לא לבנות על זה
HLZ-65	Elusa	Bar-Oz, Gini and Weissbrod	Daniel Fuks	2016-2018	A4	4	4/06a + 4/07a	60+69d	2015-02-01	Dry Sift	3	8	בקיים	Vicieae	זרע	seed	פרפרניים	Fabaceae	2	2					לחבר				להגדרה בהמשך. אולי בקיה תרבותית
HLZ-65	Elusa	Bar-Oz, Gini and Weissbrod	Daniel Fuks	2016-2018	A4	4	4/06a + 4/07a	60+69d	2015-02-01	Dry Sift	3	9	קטניות		זרע	seed	פרפרניים?	Fabaceae?
HLZ-65	Elusa	Bar-Oz, Gini and Weissbrod	Daniel Fuks	2016-2018	A4	4	4/06a + 4/07a	60+69d	2015-02-01	Dry Sift	3	10	תמר מצוי	Phoenix dactylifera	שבר גלעין	stone fragment	דקליים	Palmae	1	1
HLZ-65	Elusa	Bar-Oz, Gini and Weissbrod	Daniel Fuks	2016-2018	A4	4	4/06a + 4/07a	60+69d	2015-02-01	Dry Sift	3	11	בלתי		שבר גלעין	stone fragment			1	1									יואל: זית צעיר
HLZ-65	Elusa	Bar-Oz, Gini and Weissbrod	Daniel Fuks	2016-2018	A4	4	4/06a + 4/07a	60+69d	2015-02-01	Dry Sift	3	12	אמיך קוצני	Emex spinosa
HLZ-65	Elusa	Bar-Oz, Gini and Weissbrod	Daniel Fuks	2016-2018	A4	4	4/06a + 4/07a	60+69d	2015-02-01	Dry Sift	3	13	דגן? בגלל?
HLZ-65	Elusa	Bar-Oz, Gini and Weissbrod	Daniel Fuks	2016-2018	A4	4	4/06a + 4/07a	60+69d	2015-02-01	Dry Sift	3	14	דבקה?
HLZ-65	Elusa	Bar-Oz, Gini and Weissbrod	Daniel Fuks	2016-2018	A4	4	4/06a + 4/07a	60+69d	2015-02-15	Dry Sift	3	15	חלוקה ננסית/הררית	Thesium humile/bergeri	זרע	seed	סנטליים	Santalaceae	1	1
HLZ-65	Elusa	Bar-Oz, Gini and Weissbrod	Daniel Fuks	2016-2018	A4	4	4/06a + 4/07a	60+69d	2015-02-15	Dry Sift	3	16	תאנה	Ficus carica	אגוזיות בציפה														אולי דרך גללים
HLZ-65	Elusa	Bar-Oz, Gini and Weissbrod	Daniel Fuks	2016-2018	A4	4	4/06a + 4/07a	60+69d	2015-02-01	Dry Sift	3	17	בלתי-שונות
HLZ-65	Elusa	Bar-Oz, Gini and Weissbrod	Daniel Fuks	2016-2018	A4	4	4/06a + 4/07a	60+69d	2015-02-01	Dry Sift	3	18	גלל
HLZ-66	Elusa	Bar-Oz, Gini and Weissbrod	Daniel Fuks	2016-2018	A4	4	4/06c + 4/07c	60+69c	2015-02-01	Dry Sift	3	1	שעורה	Hordeum vulgare	גרגיר	grain	דגניים	Gramineae	48	48
HLZ-66	Elusa	Bar-Oz, Gini and Weissbrod	Daniel Fuks	2016-2018	A4	4	4/06c + 4/07c	60+69c	2015-02-01	Dry Sift	3	2	חיטה	Triticum	גרגיר	grain	דגניים	Gramineae	1	1
HLZ-66	Elusa	Bar-Oz, Gini and Weissbrod	Daniel Fuks	2016-2018	A4	4	4/06c + 4/07c	60+69c	2015-02-01	Dry Sift	3	3	חיטה/שעורה	Hordeum cf. Triticum	גרגיר	grain	דגניים	Gramineae	4	4
HLZ-66	Elusa	Bar-Oz, Gini and Weissbrod	Daniel Fuks	2016-2018	A4	4	4/06c + 4/07c	60+69c	2015-02-01	Dry Sift	3	4	גפן	Vitis vinifera	חרצן	pip	גפניים	Vitaceae	2	2
HLZ-66	Elusa	Bar-Oz, Gini and Weissbrod	Daniel Fuks	2016-2018	A4	4	4/06c + 4/07c	60+69c	2015-02-01	Dry Sift	3	5	גפן	Vitis vinifera	עוקץ	pedicel	גפניים	Vitaceae	1	1
HLZ-66	Elusa	Bar-Oz, Gini and Weissbrod	Daniel Fuks	2016-2018	A4	4	4/06c + 4/07c	60+69c	2015-02-01	Dry Sift	3	6			פרקי דגן	culm nodes	דגניים	Gramineae	37	37
HLZ-66	Elusa	Bar-Oz, Gini and Weissbrod	Daniel Fuks	2016-2018	A4	4	4/06c + 4/07c	60+69c	2015-02-01	Dry Sift	3	7			פרק ציר שיבולת	collar and basal rachis	דגניים	Gramineae	2	2
HLZ-66	Elusa	Bar-Oz, Gini and Weissbrod	Daniel Fuks	2016-2018	A4	4	4/06c + 4/07c	60+69c	2015-02-01	Dry Sift	3	8	עדשה?	Lens culinaris?	זרע	seed	פרפרניים	Fabaceae	4	4
HLZ-66	Elusa	Bar-Oz, Gini and Weissbrod	Daniel Fuks	2016-2018	A4	4	4/06c + 4/07c	60+69c	2015-02-01	Dry Sift	3	9	תמר מצוי	Phoenix dactylifera	שבר גלעין	stone fragment	דקליים	Palmae	1	1
HLZ-66	Elusa	Bar-Oz, Gini and Weissbrod	Daniel Fuks	2016-2018	A4	4	4/06c + 4/07c	60+69c	2015-02-01	Dry Sift	3	10	זית	Olea europaea					2	2
HLZ-66	Elusa	Bar-Oz, Gini and Weissbrod	Daniel Fuks	2016-2018	A4	4	4/06c + 4/07c	60+69c	2015-02-01	Dry Sift	3	11	זית?
HLZ-66	Elusa	Bar-Oz, Gini and Weissbrod	Daniel Fuks	2016-2018	A4	4	4/06c + 4/07c	60+69c	2015-02-01	Dry Sift	3	12	תאנה	Ficus carica	אגוזיות בציפה														אולי דרך גללים
HLZ-66	Elusa	Bar-Oz, Gini and Weissbrod	Daniel Fuks	2016-2018	A4	4	4/06c + 4/07c	60+69c	2015-02-01	Dry Sift	3	13	פרק סלקי	Salsoleae
HLZ-66	Elusa	Bar-Oz, Gini and Weissbrod	Daniel Fuks	2016-2018	A4	4	4/06c + 4/07c	60+69c	2015-02-15	Dry Sift	3	14	אלה אטלנטית	Pistacia atlantica	פרי	fruit	אלתיים	Anacardiaceae	1	1
HLZ-66	Elusa	Bar-Oz, Gini and Weissbrod	Daniel Fuks	2016-2018	A4	4	4/06c + 4/07c	60+69c	2015-02-15	Dry Sift	3	15	בלתי		זרע בתרמיל
HLZ-66	Elusa	Bar-Oz, Gini and Weissbrod	Daniel Fuks	2016-2018	A4	4	4/06c + 4/07c	60+69c	2015-02-01	Dry Sift	3	16	בלתי-שונות
HLZ-66	Elusa	Bar-Oz, Gini and Weissbrod	Daniel Fuks	2016-2018	A4	4	4/06c + 4/07c	60+69c	2015-02-01	Dry Sift	3	17	גלל
HLZ-66	Elusa	Bar-Oz, Gini and Weissbrod	Daniel Fuks	2016-2018	A4	4	4/06c + 4/07c	60+69c	2015-02-01	Dry Sift	3	18
HLZ-66	Elusa	Bar-Oz, Gini and Weissbrod	Daniel Fuks	2016-2018	A4	4	4/06c + 4/07c	60+69c	2015-02-01	Dry Sift	3	19
HLZ-66	Elusa	Bar-Oz, Gini and Weissbrod	Daniel Fuks	2016-2018	A4	4	4/06c + 4/07c	60+69c	2015-02-01	Dry Sift	3	20
HLZ-66	Elusa	Bar-Oz, Gini and Weissbrod	Daniel Fuks	2016-2018	A4	4	4/06c + 4/07c	60+69c	2015-02-01	Dry Sift	3	21
HLZ-7	Elusa	Bar-Oz, Gini and Weissbrod	Daniel Fuks, Yael Slasky	2015	A1	1	1/04a	20	2015-02-01	Bucket Floated	8	1	שעורה	Hordeum	גרגיר	grain	דגניים	Gramineae	14	14			כן
HLZ-7	Elusa	Bar-Oz, Gini and Weissbrod	Daniel Fuks, Yael Slasky	2015	A1	1	1/04a	20	2015-02-01	Bucket Floated		2	גפן	Vitis vinifera	חרצן	pip	גפניים	Vitaceae	2	2			כן		אחד עם פרי ואחד ועוד שני חלקים קטנים
HLZ-7	Elusa	Bar-Oz, Gini and Weissbrod	Daniel Fuks, Yael Slasky	2015	A1	1	1/04a	20	2015-02-01	Bucket Floated		3	קטנית קטנה ושטוחה		זרע	seed	פרפרניים	Fabaceae	1	1			כן		קטנית שטוחה שאיננה עדשה. צריך עוד כדי לצרף לזיהוי
HLZ-7	Elusa	Bar-Oz, Gini and Weissbrod	Daniel Fuks, Yael Slasky	2015	A1	1	1/04a	20	2015-02-01	Bucket Floated		4	עדשה תרבותית	Lens culinaris	זרע	seed	פרפרניים	Fabaceae	5	5			כן		באישור יעל	2שלמים ו4 חצאים
HLZ-7	Elusa	Bar-Oz, Gini and Weissbrod	Daniel Fuks, Yael Slasky	2015	A1	1	1/04a	20	2015-02-01	Bucket Floated		5	בלתי מזוהה		זרע	seed	פרפרניים	Fabaceae	1	1			כן		לא ניתן לזהות
HLZ-7	Elusa	Bar-Oz, Gini and Weissbrod	Daniel Fuks, Yael Slasky	2015	A1	1	1/04a	20	2015-02-01	Bucket Floated		6	EMPTY
HLZ-7	Elusa	Bar-Oz, Gini and Weissbrod	Daniel Fuks, Yael Slasky	2015	A1	1	1/04a	20	2015-02-01	Bucket Floated		7	בלתי מזוהה						6	6			כן		לא להתעסק
HLZ-7	Elusa	Bar-Oz, Gini and Weissbrod	Daniel Fuks, Yael Slasky	2015	A1	1	1/04a	20	2015-02-01	Bucket Floated		8	חיטה	Triticum	גרגיר	grain	דגניים	Gramineae	1	1			כן
HLZ-7	Elusa	Bar-Oz, Gini and Weissbrod	Daniel Fuks, Yael Slasky	2015	A1	1	1/04a	20	2015-02-01	Bucket Floated		9	בלתי מזוהה		גרגיר	grain	דגניים	Gramineae	3	3			כן			לא להתעסק
HLZ-7	Elusa	Bar-Oz, Gini and Weissbrod	Daniel Fuks, Yael Slasky	2015	A1	1	1/04a	20	2015-02-01	Bucket Floated		10	פיקוס התאנה	Ficus carica	אגוזית	nutlet	תותיים	Moraceae	5	5			כן
HLZ-7	Elusa	Bar-Oz, Gini and Weissbrod	Daniel Fuks, Yael Slasky	2015	A1	1	1/04a	20	2015-02-01	Bucket Floated		11	חלמית	Malva	זרע			Malvaceae	2	2			לא	רצנטי?
HLZ-7	Elusa	Bar-Oz, Gini and Weissbrod	Daniel Fuks, Yael Slasky	2015	A1	1	1/04a	20	2015-02-01	Bucket Floated		12	דבקה	Galium	פרודה		פואתיים	Rubiaceae	1	1			כן
HLZ-7	Elusa	Bar-Oz, Gini and Weissbrod	Daniel Fuks, Yael Slasky	2015	A1	1	1/04a	20	2015-02-01	Bucket Floated		13	בן-שלח	Reboudia pinnata	זרע בקליפה	seed in pod	מצליבים	Brassicaceae	1	1			כן
HLZ-7	Elusa	Bar-Oz, Gini and Weissbrod	Daniel Fuks, Yael Slasky	2015	A1	1	1/04a	20	2015-02-01	Bucket Floated		14	מתנן שעיר	Thymelaea hirsuta	פרי	fruitlet	מתנניים	Thymelaceae	11	11			כן		צריך להסתכל שוב על הקטנים
HLZ-7	Elusa	Bar-Oz, Gini and Weissbrod	Daniel Fuks, Yael Slasky	2015	A1	1	1/04a	20	2015-02-01	Bucket Floated		15	בלתי מזוהה		עלים+				20	20			כן		עלים לא מזוהים
HLZ-7	Elusa	Bar-Oz, Gini and Weissbrod	Daniel Fuks, Yael Slasky	2015	A1	1	1/04a	20	2015-02-01	Bucket Floated		16	מתנן שעיר	Thymelaea hirsuta	עלה	leaf	מתנניים	Thymelaceae	68	68			אחד לא
HLZ-7	Elusa	Bar-Oz, Gini and Weissbrod	Daniel Fuks, Yael Slasky	2015	A1	1	1/04a	20	2015-02-01	Bucket Floated		17	בלתי מזוהה		פרח?				1	1			כן			השווה לעיל
HLZ-7	Elusa	Bar-Oz, Gini and Weissbrod	Daniel Fuks, Yael Slasky	2015	A1	1	1/04a	20	2015-02-01	Bucket Floated		18	ארנבית שרועה	Arnebia decumbens	זרע	seed	זיפניים	Boraginaceae	2	2			אחד לא		בדוק-עמ' 62 במחברת
HLZ-7	Elusa	Bar-Oz, Gini and Weissbrod	Daniel Fuks, Yael Slasky	2015	A1	1	1/04a	20	2015-02-01	Bucket Floated		19	בלתי מזוהה		זרע				1	1			כן
HLZ-7	Elusa	Bar-Oz, Gini and Weissbrod	Daniel Fuks, Yael Slasky	2015	A1	1	1/04a	20	2015-02-01	Bucket Floated		20	בלתי מזוהה		תפרחת?				1	1	חומעה		לא			השווה
HLZ-7	Elusa	Bar-Oz, Gini and Weissbrod	Daniel Fuks, Yael Slasky	2015	A1	1	1/04a	20	2015-02-01	Bucket Floated		21	דגני		גרגיר				1	1	זון?		כן		דגני עטוי אבל חלול!?
HLZ-7	Elusa	Bar-Oz, Gini and Weissbrod	Daniel Fuks, Yael Slasky	2015	A1	1	1/04a	20	2015-02-01	Bucket Floated		22	בלתי מזוהה		?				1	1			כן		או עץ או מעניין
HLZ-7	Elusa	Bar-Oz, Gini and Weissbrod	Daniel Fuks, Yael Slasky	2015	A1	1	1/04a	20	2015-02-01	Bucket Floated		23	דגני?		גרגיר?				1	1			כן		דגני או זיוף
HLZ-7	Elusa	Bar-Oz, Gini and Weissbrod	Daniel Fuks, Yael Slasky	2015	A1	1	1/04a	20	2015-02-01	Bucket Floated		24	בלתי מזוהה		?				1	1			כן
HLZ-7	Elusa	Bar-Oz, Gini and Weissbrod	Daniel Fuks, Yael Slasky	2015	A1	1	1/04a	20	2015-02-01	Bucket Floated		25	בלתי מזוהה		זרע?				1	1			כן
HLZ-7	Elusa	Bar-Oz, Gini and Weissbrod	Daniel Fuks, Yael Slasky	2015	A1	1	1/04a	20	2015-02-01	Bucket Floated		26	בלתי מזוהה		עלים קטנים				9	9?			כן
HLZ-7	Elusa	Bar-Oz, Gini and Weissbrod	Daniel Fuks, Yael Slasky	2015	A1	1	1/04a	20	2015-02-01	Bucket Floated		27	דגני		פרק ציר שיבולת	rachis fragment	דגניים	Gramineae	31	31			כן		mostly barley					כמעט הכל שעורה
HLZ-7	Elusa	Bar-Oz, Gini and Weissbrod	Daniel Fuks, Yael Slasky	2015	A1	1	1/04a	20	2015-02-01	Bucket Floated		28	דגני		גרגירים	grain	דגניים	Gramineae	3	3			כן		להגדרה
HLZ-7	Elusa	Bar-Oz, Gini and Weissbrod	Daniel Fuks, Yael Slasky	2015	A1	1	1/04a	20	2015-02-01	Bucket Floated		29	דגני		גלומות		דגניים	Gramineae	4	4			לא	רצנטי?
HLZ-7	Elusa	Bar-Oz, Gini and Weissbrod	Daniel Fuks, Yael Slasky	2015	A1	1	1/04a	20	2015-02-01	Bucket Floated		30	אשל הפרקים	Tamarix aphylla	פרקי עלים	leaf segments			4	4			כן
HLZ-7	Elusa	Bar-Oz, Gini and Weissbrod	Daniel Fuks, Yael Slasky	2015	A1	1	1/04a	20	2015-02-01	Bucket Floated		31	דגני		פרקים+ עץ	culm nodes	דגניים	Gramineae	12	12	1mm+2mm
HLZ-7	Elusa	Bar-Oz, Gini and Weissbrod	Daniel Fuks, Yael Slasky	2015	A1	1	1/04a	20	2015-02-15	Bucket Floated		32	אהל מצוי	Mesembryanthemum nodiflorum	זרע				248	248				כ-7 על גבי פחמים. 2 מפוחמים!
HLZ-7	Elusa	Bar-Oz, Gini and Weissbrod	Daniel Fuks, Yael Slasky	2015	A1	1	1/04a	20	2015-02-15	Bucket Floated		33	בלתי מזוהה		קליפה				2	2			לא	רצנטי?	2 שברים
HLZ-7	Elusa	Bar-Oz, Gini and Weissbrod	Daniel Fuks, Yael Slasky	2015	A1	1	1/04a	20	2015-02-01	Bucket Floated		34	בלתי מזוהה		שונות לא מפוחמות				7	7			לא	רצנטי?
HLZ-7	Elusa	Bar-Oz, Gini and Weissbrod	Daniel Fuks, Yael Slasky	2015	A1	1	1/04a	20	2015-02-01	Bucket Floated		35	חרק						9	9			לא	רצנטי
HLZ-7	Elusa	Bar-Oz, Gini and Weissbrod	Daniel Fuks, Yael Slasky	2015	A1	1	1/04a	20	2015-02-01	Bucket Floated		36	בלתי מזוהה		עץ לרוב				12	תריסר+			כן		שאלה אם יש כאן דברים מעניינים	לא להתעסק
HLZ-7	Elusa	Bar-Oz, Gini and Weissbrod	Daniel Fuks, Yael Slasky	2015	A1	1	1/04a	20	2015-02-01	Bucket Floated		37	בלתי מזוהה		שברים				12	תריסר+			כן
HLZ-7	Elusa	Bar-Oz, Gini and Weissbrod	Daniel Fuks, Yael Slasky	2015	A1	1	1/04a	20	2015-02-01	Bucket Floated		38	בלתי מזוהה		שונות				10	הרבה			כן		שווה בדיקה נוספת בהזדמנות
HLZ-7	Elusa	Bar-Oz, Gini and Weissbrod	Daniel Fuks, Yael Slasky	2015	A1	1	1/04a	20	2015-02-01	Bucket Floated		40	לחך	Plantago sp.	זרע	seed	לחכיים	Plantaginaceae	4	4			כן			?עלים
HLZ-7	Elusa	Bar-Oz, Gini and Weissbrod	Daniel Fuks, Yael Slasky	2015	A1	1	1/04a	20	2015-02-01	Bucket Floated		41	בלתי מזוהה		בלתי מזוהה				1	1			כן	מאד שביר, זרע בתוך גלומות
HLZ-7	Elusa	Bar-Oz, Gini and Weissbrod	Daniel Fuks, Yael Slasky	2015	A1	1	1/04a	20	2015-02-01	Bucket Floated		42	בלתי מזוהה		מררית?				1	1			לא	רצנטי?
HLZ-7	Elusa	Bar-Oz, Gini and Weissbrod	Daniel Fuks, Yael Slasky	2015	A1	1	1/04a	20	2015-02-01	Bucket Floated		43	בלתי מזוהה		בלתי מזוהה			מורכבים?	1	1			לא	רצנטי?
HLZ-7	Elusa	Bar-Oz, Gini and Weissbrod	Daniel Fuks, Yael Slasky	2015	A1	1	1/04a	20	2015-02-01	Bucket Floated		44	אהל מצוי	Mesembryanthemum nodiflorum	זרע	seed	חיעדיים	Aizoaceae	3	3			כן	3מחוברים
HLZ-7	Elusa	Bar-Oz, Gini and Weissbrod	Daniel Fuks, Yael Slasky	2015	A1	1	1/04a	20	2015-02-15	Bucket Floated		45	חרק		חרק								לא
HLZ-7	Elusa	Bar-Oz, Gini and Weissbrod	Daniel Fuks, Yael Slasky	2015	A1	1	1/04a	20	2015-02-15	Bucket Floated		46	בלתי מזוהה		בלתי מזוהה				2	2			כן		עץ? קמור. השוו לעיל
HLZ-7	Elusa	Bar-Oz, Gini and Weissbrod	Daniel Fuks, Yael Slasky	2015	A1	1	1/04a	20	2015-02-01	Bucket Floated		47	בלתי מזוהה		בלתי מזוהה				2	2			כן		קטנים מאד
HLZ-7	Elusa	Bar-Oz, Gini and Weissbrod	Daniel Fuks, Yael Slasky	2015	A1	1	1/04a	20	2015-02-01	Bucket Floated		48	אשל הפרקים	Tamarix aphylla	פרקי עלים	leaf segments			64	64			כן		טיפוסים שונים? זה מספר חתיכות, לא מספר פרקים. יש פרקים מחוברים
HLZ-7	Elusa	Bar-Oz, Gini and Weissbrod	Daniel Fuks, Yael Slasky	2015	A1	1	1/04a	20	2015-02-01	Bucket Floated		49	בלתי מזוהה		שונות				25	25			לא	רצנטי?
HLZ-7	Elusa	Bar-Oz, Gini and Weissbrod	Daniel Fuks, Yael Slasky	2015	A1	1	1/04a	20	2015-02-01	Bucket Floated		50	דגני		מלענים				46	46			למעט 3
HLZ-7	Elusa	Bar-Oz, Gini and Weissbrod	Daniel Fuks, Yael Slasky	2015	A1	1	1/04a	20	2015-02-01	Bucket Floated		51	דגני						11	11			כן
HLZ-7	Elusa	Bar-Oz, Gini and Weissbrod	Daniel Fuks, Yael Slasky	2015	A1	1	1/04a	20	2015-02-01	Bucket Floated		52	דגני		פרק ציר שיבולת	rachis fragment	דגניים	Gramineae	70	70			כן		מגוון ולא הכל מובהק					קטנים מדיי. כנראה גם שעורה
HLZ-7	Elusa	Bar-Oz, Gini and Weissbrod	Daniel Fuks, Yael Slasky	2015	A1	1	1/04a	20	2015-02-01	Bucket Floated		53	פיקוס התאנה	Ficus carica	אגוזית	nutlet	תותיים	Moraceae	1	1			כן		שווה צילום
HLZ-7	Elusa	Bar-Oz, Gini and Weissbrod	Daniel Fuks, Yael Slasky	2015	A1	1	1/04a	20	2015-02-01	Bucket Floated		54	פיקוס התאנה	Ficus carica	אגוזית	nutlet	תותיים	Moraceae	10	10			כן
HLZ-7	Elusa	Bar-Oz, Gini and Weissbrod	Daniel Fuks, Yael Slasky	2015	A1	1	1/04a	20	2015-02-01	Bucket Floated		55	פיקוס התאנה	Ficus carica	אגוזית	nutlet	תותיים	Moraceae	9	9			כן
HLZ-7	Elusa	Bar-Oz, Gini and Weissbrod	Daniel Fuks, Yael Slasky	2015	A1	1	1/04a	20	2015-02-01	Bucket Floated		56	פיקוס התאנה	Ficus carica	אגוזית	nutlet	תותיים	Moraceae	2	2			כן		שברים
HLZ-7	Elusa	Bar-Oz, Gini and Weissbrod	Daniel Fuks, Yael Slasky	2015	A1	1	1/04a	20	2015-02-01	Bucket Floated		57	פיקוס התאנה	Ficus carica	אגוזית	nutlet	תותיים	Moraceae	54	54			כן
HLZ-7	Elusa	Bar-Oz, Gini and Weissbrod	Daniel Fuks, Yael Slasky	2015	A1	1	1/04a	20	2015-02-01	Bucket Floated		58	בלתי מזוהה						35	35			כן		יש יבלית, תאנה ועוד
HLZ-7	Elusa	Bar-Oz, Gini and Weissbrod	Daniel Fuks, Yael Slasky	2015	A1	1	1/04a	20	2015-02-01	Bucket Floated		59	בלתי מזוהה						90	90			כן		עוד שניים לא מפוחמים אבל לא בטוח אם זה משהו
HLZ-7	Elusa	Bar-Oz, Gini and Weissbrod	Daniel Fuks, Yael Slasky	2015	A1	1	1/04a	20	2015-02-01	Bucket Floated		60	בלתי מזוהה						150	100-200			כן
HLZ-7	Elusa	Bar-Oz, Gini and Weissbrod	Daniel Fuks, Yael Slasky	2016	A1	1	1/04a	20	2015-02-01	Bucket Floated		61	בקיים	Vicieae		seed	פרפרניים	Fabaceae	6	6			כן		לא ניתן לזהות
HLZ-7	Elusa	Bar-Oz, Gini and Weissbrod	Daniel Fuks, Yael Slasky	2017	A1	1	1/04a	20	2015-02-15	Bucket Floated		62	בלתי מזוהה						1	1	עם דגם מגובשש		כן		להראות ליואל- דגם מגובשש	להגדרה
HLZ-7	Elusa	Bar-Oz, Gini and Weissbrod	Daniel Fuks, Yael Slasky	2017	A1	1	1/04a	20	2015-02-15	Bucket Floated		63	בלתי מזוהה						1	1			כן		ליואל-עוקץ	להגדרה
HLZ-7	Elusa	Bar-Oz, Gini and Weissbrod	Daniel Fuks, Yael Slasky	2017	A1	1	1/04a	20	2015-02-01	Bucket Floated		64	חיטה/שעורה	Hordeum cf. Triticum	גרגיר	grain	דגניים	Gramineae	1	1			כן
HLZ-7	Elusa	Bar-Oz, Gini and Weissbrod	Daniel Fuks, Yael Slasky	2017	A1	1	1/04a	20	2015-02-01	Bucket Floated		65	חיטה טטרפלוידית	Triticum turgidum s.l.		rachis			2	2	1mm
HLZ-7	Elusa	Bar-Oz, Gini and Weissbrod	Daniel Fuks, Yael Slasky	2017	A1	1	1/04a	20	2015-02-01	Bucket Floated		66	גלל - שבר								2mm?
HLZ-7	Elusa	Bar-Oz, Gini and Weissbrod	Daniel Fuks, Yael Slasky	2017	A1	1	1/04a	20	2015-02-01	Bucket Floated		67	עוקץ גפן						1	1	1mm
HLZ-8	Elusa	Bar-Oz, Gini and Weissbrod	Daniel Fuks, Yael Slasky	2015	A1	1	1/04a	20	2015-02-01	Wet Sieve Picking	40	1	שעורה	Hordeum	גרגיר	grain	דגניים	Gramineae	59	59
HLZ-8	Elusa	Bar-Oz, Gini and Weissbrod	Daniel Fuks, Yael Slasky	2015	A1	1	1/04a	20	2015-02-01	Wet Sieve Picking		2	גפן	Vitis vinifera	חרצן	pip	גפניים	Vitaceae	7	7		1 שבור
HLZ-8	Elusa	Bar-Oz, Gini and Weissbrod	Daniel Fuks, Yael Slasky	2015	A1	1	1/04a	20	2015-02-01	Wet Sieve Picking		3	מתנן שעיר	Thymelaea hirsuta					1	1
HLZ-8	Elusa	Bar-Oz, Gini and Weissbrod	Daniel Fuks, Yael Slasky	2015	A1	1	1/04a	20	2015-02-01	Wet Sieve Picking		4	פיקוס התאנה	Ficus carica	ציפה	fruit	תותיים	Moraceae	1	1
HLZ-8	Elusa	Bar-Oz, Gini and Weissbrod	Daniel Fuks, Yael Slasky	2015	A1	1	1/04a	20	2015-02-01	Wet Sieve Picking		5	דגני		פרק				1	1
HLZ-8	Elusa	Bar-Oz, Gini and Weissbrod	Daniel Fuks, Yael Slasky	2015	A1	1	1/04a	20	2015-02-01	Wet Sieve Picking		6	בלתי מזוהה	culm?	ענף שיח				2	2
HLZ-8	Elusa	Bar-Oz, Gini and Weissbrod	Daniel Fuks, Yael Slasky	2015	A1	1	1/04a	20	2015-02-01	Wet Sieve Picking		7	חיטה/שעורה	Hordeum cf. Triticum	גרגיר	grain	דגניים	Gramineae	2	2					אולי אחד זון? לחזור לזה בהזדמנות
HLZ-9	Elusa	Bar-Oz, Gini and Weissbrod	Daniel Fuks, Yael Slasky	2015	A1	1	1/09a	58	2015-02-01	Bucket Floated		1	גפן	Vitis vinifera	חרצן	pip	גפניים	Vitaceae	3	3			כן
HLZ-9	Elusa	Bar-Oz, Gini and Weissbrod	Daniel Fuks, Yael Slasky	2015	A1	1	1/09a	58	2015-02-01	Bucket Floated		2	מתנן שעיר	Thymelaea hirsuta	אגוזית	nutlet	מתנניים	Thymelaceae	134	134		כן	כנראה	לא	130 שלמים, 3 עם עוקץ
HLZ-9	Elusa	Bar-Oz, Gini and Weissbrod	Daniel Fuks, Yael Slasky	2015	A1	1	1/09a	58	2015-02-01	Bucket Floated		3	מתנן שעיר?	Thymelaea hirsuta?	אגוזית	nutlet	מתנניים	Thymelaceae	3	3		כן	כנראה	לא	מכוסים בקליפה
HLZ-9	Elusa	Bar-Oz, Gini and Weissbrod	Daniel Fuks, Yael Slasky	2015	A1	1	1/09a	58	2015-02-01	Bucket Floated		4	מתנן שעיר	Thymelaea hirsuta	עלים	leaves	מתנניים	Thymelaceae	290	290		כן	כן	לא
HLZ-9	Elusa	Bar-Oz, Gini and Weissbrod	Daniel Fuks, Yael Slasky	2015	A1	1	1/09a	58	2015-02-01	Bucket Floated		5	מתנן שעיר	Thymelaea hirsuta	ניצנים ועלים מחוברים	buds and attached leaves	מתנניים	Thymelaceae	156	156		לרוב	כן	לא	כולל עלים רבים, פירות בודדים
HLZ-9	Elusa	Bar-Oz, Gini and Weissbrod	Daniel Fuks, Yael Slasky	2015	A1	1	1/09a	58	2015-02-01	Bucket Floated		6	מתנן שעיר	Thymelaea hirsuta	פרח	flower	מתנניים	Thymelaceae	8	8		כמעט	כן	לא
HLZ-9	Elusa	Bar-Oz, Gini and Weissbrod	Daniel Fuks, Yael Slasky	2015	A1	1	1/09a	58	2015-02-01	Bucket Floated		7	מתנן שעיר	Thymelaea hirsuta	פירות עטופים*	nutlet	מתנניים	Thymelaceae	3	3		לצלם	כן	לא	בשלבים שונים, יש עוד במבחנה 9-2
HLZ-9	Elusa	Bar-Oz, Gini and Weissbrod	Daniel Fuks, Yael Slasky	2015	A1	1	1/09a	58	2015-02-01	Bucket Floated		8	תאנה	Ficus carica	אגוזית	nutlet	תותיים	Moraceae	2	2		כן			בדקתי באוסף ויואל ראה. צריך יותר שקמה באוסף
HLZ-9	Elusa	Bar-Oz, Gini and Weissbrod	Daniel Fuks, Yael Slasky	2015	A1	1	1/09a	58	2015-02-01	Bucket Floated		9	דגן		פרק ציר שיבולת	rachis fragment	דגניים	Gramineae	27	27	שעורה וחיטה 4X				להגדרה
HLZ-9	Elusa	Bar-Oz, Gini and Weissbrod	Daniel Fuks, Yael Slasky	2015	A1	1	1/09a	58	2015-02-01	Bucket Floated		10	דגני		פרקים	culm nodes	דגניים	Gramineae	6	6
HLZ-9	Elusa	Bar-Oz, Gini and Weissbrod	Daniel Fuks, Yael Slasky	2015	A1	1	1/09a	58	2015-02-01	Bucket Floated		11	דגני		מלענים?		דגניים	Gramineae	7	7			אחד לא מפוחם
HLZ-9	Elusa	Bar-Oz, Gini and Weissbrod	Daniel Fuks, Yael Slasky	2015	A1	1	1/09a	58	2015-02-01	Bucket Floated		12	דגני		גלומה	glume	דגניים	Gramineae	1	1
HLZ-9	Elusa	Bar-Oz, Gini and Weissbrod	Daniel Fuks, Yael Slasky	2015	A1	1	1/09a	58	2015-02-01	Bucket Floated		13	בלתי מזוהה		גזע ועלים				31	31					מתנן, לעבור בהמשך
HLZ-9	Elusa	Bar-Oz, Gini and Weissbrod	Daniel Fuks, Yael Slasky	2015	A1	1	1/09a	58	2015-02-01	Bucket Floated		14	בלתי מזוהה		צואה או ציפה?				17	17
HLZ-9	Elusa	Bar-Oz, Gini and Weissbrod	Daniel Fuks, Yael Slasky	2015	A1	1	1/09a	58	2015-02-01	Bucket Floated		15	בלתי מזוהה		ניצנים ברי זיהוי ועלים				62	62					לזהות בהמשך
HLZ-9	Elusa	Bar-Oz, Gini and Weissbrod	Daniel Fuks, Yael Slasky	2015	A1	1	1/09a	58	2015-02-01	Bucket Floated		16	בלתי מזוהה		ניצנים				59	59					הרוב כנראה מתנו אך יש עוד
HLZ-9	Elusa	Bar-Oz, Gini and Weissbrod	Daniel Fuks, Yael Slasky	2015	A1	1	1/09a	58	2015-02-01	Bucket Floated		17	אהל מצוי	Mesembryanthemum nodiflorum	פרי	fruitlet	חיעדיים	Aizoaceae	2	2			לא	כן	לוודא מין באוסף
HLZ-9	Elusa	Bar-Oz, Gini and Weissbrod	Daniel Fuks, Yael Slasky	2015	A1	1	1/09a	58	2015-02-01	Bucket Floated		18	בלתי מזוהה		פירות/ניצנים				48	48					הרוב כנראה מתנו
HLZ-9	Elusa	Bar-Oz, Gini and Weissbrod	Daniel Fuks, Yael Slasky	2015	A1	1	1/09a	58	2015-02-01	Bucket Floated		19	בלתי מזוהה		עלים	leaves			3	3					לזהות בהמשך
HLZ-9	Elusa	Bar-Oz, Gini and Weissbrod	Daniel Fuks, Yael Slasky	2015	A1	1	1/09a	58	2015-02-01	Bucket Floated		20	בלתי מזוהה		זרעים וכו'	seeds+			12	12					לזהות בהמשך
HLZ-9	Elusa	Bar-Oz, Gini and Weissbrod	Daniel Fuks, Yael Slasky	2015	A1	1	1/09a	58	2015-02-01	Bucket Floated		21	פיגמית מגובששת cf.	Haplophyllum tuberculatum cf.	פירות	fruit	פיגמיים	Rutaceae	1	1					לעשות עוד בדיקה
HLZ-9	Elusa	Bar-Oz, Gini and Weissbrod	Daniel Fuks, Yael Slasky	2015	A1	1	1/09a	58	2015-02-01	Bucket Floated		22	בלתי מזוהה		שונות				13	13			כן		אולי בהמשך
HLZ-9	Elusa	Bar-Oz, Gini and Weissbrod	Daniel Fuks, Yael Slasky	2015	A1	1	1/09a	58	2015-02-01	Bucket Floated		23	בלתי מזוהה		זרע בגביע			שפתניים?	1	1	מתנן?		כן		לחבר בהמשך
HLZ-9	Elusa	Bar-Oz, Gini and Weissbrod	Daniel Fuks, Yael Slasky	2015	A1	1	1/09a	58	2015-02-01	Bucket Floated		24	בלתי מזוהה		שונות								כן		לא להתעסק
HLZ-9	Elusa	Bar-Oz, Gini and Weissbrod	Daniel Fuks, Yael Slasky	2015	A1	1	1/09a	58	2015-02-01	Bucket Floated		25	אשל הפרקים	Tamarix aphylla	פרקי עלים	leaf segments			25	25			כן		20 חתיכות, 25 פרקים
HLZ-9	Elusa	Bar-Oz, Gini and Weissbrod	Daniel Fuks, Yael Slasky	2015	A1	1	1/09a	58	2015-02-01	Bucket Floated		26	Salsoleae	Salsoleae	פרקים		סלקיים	Chenopodiaceae	8	8			כן		לזיהוי בהמשך- כנראה סלקיים
HLZ-9	Elusa	Bar-Oz, Gini and Weissbrod	Daniel Fuks, Yael Slasky	2015	A1	1	1/09a	58	2015-02-15	Bucket Floated		27	בלתי מזוהה		פרקים		סלקיים?	Chenopodiaceae?	2	2			כן
HLZ-9	Elusa	Bar-Oz, Gini and Weissbrod	Daniel Fuks, Yael Slasky	2015	A1	1	1/09a	58	2015-02-15	Bucket Floated		28	בלתי מזוהה		קשקש?			Tamaricaceae	2	2			לא		עלה עם שערות?
HLZ-9	Elusa	Bar-Oz, Gini and Weissbrod	Daniel Fuks, Yael Slasky	2015	A1	1	1/09a	58	2015-02-01	Bucket Floated		29	ארנבית שרועה	Arnebia decumbens	אגוזית	nutlet	זיפניים	Boraginaceae	5	5			2 מפוחמים	לא
HLZ-9	Elusa	Bar-Oz, Gini and Weissbrod	Daniel Fuks, Yael Slasky	2015	A1	1	1/09a	58	2015-02-01	Bucket Floated		30	גלעינית זעירת פרחים	Buglossoides tenuiflora	אגוזית	nutlet	זיפניים	Boraginaceae	1	1			כן
HLZ-9	Elusa	Bar-Oz, Gini and Weissbrod	Daniel Fuks, Yael Slasky	2015	A1	1	1/09a	58	2015-02-01	Bucket Floated		31	ארכובית או חומעה						1	1			כן
HLZ-9	Elusa	Bar-Oz, Gini and Weissbrod	Daniel Fuks, Yael Slasky	2015	A1	1	1/09a	58	2015-02-01	Bucket Floated		32	בסיה שיכנית cf.	Bassia muricata cf.	קוץ	thorn	סלקיים	Chenopodiaceae	1	1			כן
HLZ-9	Elusa	Bar-Oz, Gini and Weissbrod	Daniel Fuks, Yael Slasky	2015	A1	1	1/09a	58	2015-02-01	Bucket Floated		33	בוצין	Verbascum	הלקט	pod	לועניתיים	Scrophulariaceae	1	1			כן		להגדיר
HLZ-9	Elusa	Bar-Oz, Gini and Weissbrod	Daniel Fuks, Yael Slasky	2015	A1	1	1/09a	58	2015-02-01	Bucket Floated		34	חרק		ראש נמלה				2	1+1					ראש ומשהו אחר
HLZ-9	Elusa	Bar-Oz, Gini and Weissbrod	Daniel Fuks, Yael Slasky	2015	A1	1	1/09a	58	2015-02-01	Bucket Floated		35	פיגמית?	Haplophyllum tuberculatum cf.	זרע, הלקט, ולא ברור	fruit	פיגמיים	Rutaceae	4	4			כן		לחבר בהמשך
HLZ-9	Elusa	Bar-Oz, Gini and Weissbrod	Daniel Fuks, Yael Slasky	2015	A1	1	1/09a	58	2015-02-01	Bucket Floated		36	בלתי מזוהה		זרעים? ניצני אשליל?				5	5			כן		ניצנים של אשליל?
HLZ-9	Elusa	Bar-Oz, Gini and Weissbrod	Daniel Fuks, Yael Slasky	2015	A1	1	1/09a	58	2015-02-01	Bucket Floated		37	בלתי מזוהה		עוקצים?				11	11			כן
HLZ-9	Elusa	Bar-Oz, Gini and Weissbrod	Daniel Fuks, Yael Slasky	2015	A1	1	1/09a	58	2015-02-01	Bucket Floated		38	בלתי מזוהה		זרע?			סוככי?	1	1			כן		לא בטוח שאפשר לזהות
HLZ-9	Elusa	Bar-Oz, Gini and Weissbrod	Daniel Fuks, Yael Slasky	2015	A1	1	1/09a	58	2015-02-15	Bucket Floated		39	בלתי מזוהה		?				4	4			כן		לא להתעסק
HLZ-9	Elusa	Bar-Oz, Gini and Weissbrod	Daniel Fuks, Yael Slasky	2015	A1	1	1/09a	58	2015-02-15	Bucket Floated		40	בלתי מזוהה		שבר של פרי				1	1			כן		לנמק	אמיך??
HLZ-9	Elusa	Bar-Oz, Gini and Weissbrod	Daniel Fuks, Yael Slasky	2015	A1	1	1/09a	58	2015-02-01	Bucket Floated		41	דגני						1	1			כן		להגדרה
HLZ-9	Elusa	Bar-Oz, Gini and Weissbrod	Daniel Fuks, Yael Slasky	2015	A1	1	1/09a	58	2015-02-01	Bucket Floated		42	דגני						1	1			כן		להגדרה
HLZ-9	Elusa	Bar-Oz, Gini and Weissbrod	Daniel Fuks, Yael Slasky	2015	A1	1	1/09a	58	2015-02-01	Bucket Floated		43	בלתי מזוהה				דגניים		3	3			כן
HLZ-9	Elusa	Bar-Oz, Gini and Weissbrod	Daniel Fuks, Yael Slasky	2015	A1	1	1/09a	58	2015-02-01	Bucket Floated		44	בלתי מזוהה						1	1			כן		יכןל להתחבר בהמשך
HLZ-9	Elusa	Bar-Oz, Gini and Weissbrod	Daniel Fuks, Yael Slasky	2015	A1	1	1/09a	58	2015-02-01	Bucket Floated		45				culm node			1	1
HLZ-9	Elusa	Bar-Oz, Gini and Weissbrod	Daniel Fuks	2016-2018	A1	1	1/09a	58	2015-02-01	Bucket Floated		46	שעורה					rachis	1	1
HLZ-9	Elusa	Bar-Oz, Gini and Weissbrod	Daniel Fuks	2016-2018	A1	1	1/09a	58	2015-02-01	Bucket Floated		47	שעורה x6					rachis	2	2
HLZ-9	Elusa	Bar-Oz, Gini and Weissbrod	Daniel Fuks	2016-2018	A1	1	1/09a	58	2015-02-01	Bucket Floated		48	מתנן שעיר		ניצן עם עלים/ קצה ענף				2	2
HLZ-9	Elusa	Bar-Oz, Gini and Weissbrod	Daniel Fuks	2016-2018	A1	1	1/09a	58	2015-02-01	Bucket Floated		49	מתנן שעיר		עלה	leaf			2	2
HLZ-9	Elusa	Bar-Oz, Gini and Weissbrod	Daniel Fuks	2016-2018	A1	1	1/09a	58	2015-02-01	Bucket Floated		50	שונות - למיין בהמשך
HLZ-9	Elusa	Bar-Oz, Gini and Weissbrod	Daniel Fuks	2016-2018	A1	1	1/09a	58	2015-02-01	Bucket Floated		51
HLZ-9	Elusa	Bar-Oz, Gini and Weissbrod	Daniel Fuks	2016-2018	A1	1	1/09a	58	2015-02-01	Bucket Floated		52
HLZ-9	Elusa	Bar-Oz, Gini and Weissbrod	Daniel Fuks	2016-2018	A1	1	1/09a	58	2015-02-01	Bucket Floated
HLZ-9	Elusa	Bar-Oz, Gini and Weissbrod	Daniel Fuks	2016-2018	A1	1	1/09a	58	2015-02-01	Bucket Floated
HLZ-9	Elusa	Bar-Oz, Gini and Weissbrod	Daniel Fuks	2016-2018	A1	1	1/09a	58	2015-02-01	Bucket Floated
HLZ-9	Elusa	Bar-Oz, Gini and Weissbrod	Daniel Fuks	2016-2018	A1	1	1/09a	58	2015-02-15	Bucket Floated
HLZ-9	Elusa	Bar-Oz, Gini and Weissbrod	Daniel Fuks	2016-2018	A1	1	1/09a	58	2015-02-15	Bucket Floated
HLZ-9	Elusa	Bar-Oz, Gini and Weissbrod	Daniel Fuks	2016-2018	A1	1	1/09a	58	2015-02-01	Bucket Floated
HLZ-9	Elusa	Bar-Oz, Gini and Weissbrod	Daniel Fuks	2016-2018	A1	1	1/09a	58	2015-02-01	Bucket Floated
HLZ-9	Elusa	Bar-Oz, Gini and Weissbrod	Daniel Fuks	2016-2018	A1	1	1/09a	58	2015-02-01	Bucket Floated
HLZ-9	Elusa	Bar-Oz, Gini and Weissbrod	Daniel Fuks	2016-2018	A1	1	1/09a	58	2015-02-01	Bucket Floated
HLZ-9	Elusa	Bar-Oz, Gini and Weissbrod	Daniel Fuks	2016-2018	A1	1	1/09a	58	2015-02-01	Bucket Floated
HLZ-9	Elusa	Bar-Oz, Gini and Weissbrod	Daniel Fuks	2016-2018	A1	1	1/09a	58	2015-02-01	Bucket Floated
HLZ-9	Elusa	Bar-Oz, Gini and Weissbrod	Daniel Fuks	2016-2018	A1	1	1/09a	58	2015-02-01	Bucket Floated
HLZ-9	Elusa	Bar-Oz, Gini and Weissbrod	Daniel Fuks	2016-2018	A1	1	1/09a	58	2015-02-01	Bucket Floated
HLZ-9	Elusa	Bar-Oz, Gini and Weissbrod	Daniel Fuks	2016-2018	A1	1	1/09a	58	2015-02-01	Bucket Floated
HLZ-9	Elusa	Bar-Oz, Gini and Weissbrod	Daniel Fuks	2016-2018	A1	1	1/09a	58	2015-02-01	Bucket Floated
HLZ-9	Elusa	Bar-Oz, Gini and Weissbrod	Daniel Fuks	2016-2018	A1	1	1/09a	58	2015-02-01	Bucket Floated
HLZ-9	Elusa	Bar-Oz, Gini and Weissbrod	Daniel Fuks	2016-2018	A1	1	1/09a	58	2015-02-01	Bucket Floated
HLZ-9	Elusa	Bar-Oz, Gini and Weissbrod	Daniel Fuks	2016-2018	A1	1	1/09a	58	2015-02-01	Bucket Floated
HLZ-9	Elusa	Bar-Oz, Gini and Weissbrod	Daniel Fuks	2016-2018	A1	1	1/09a	58	2015-02-01	Bucket Floated
											*estimating 8L per bucket

## Sheet: Samples and volumes
	Wet Sieve Picking									Flotation Samples		(Bucket Floated by Lior)									Dry Sift Samples (from Udi's cross section)
Lab No.	Area	Locus	Basket	Height	Excavation Date	Status	Comments		Lab No.	Area	Square	Basket	Height	Excavation Date	Volume	Sizes checked	Status	Comments
	A	1/01a	6	233.01	2015-01-02		לא זרעים														HLZ-44	A	1b/east section	1a
HLZ-4	A	1/02a	12	233.11-33	2015-01-02	במבחנות			HLZ-3	A	1/02a	12	233.11-33	2015-01-02	2mm+=10cc, 1mm=3cc,0.5mm=3cc, 0.3mm=1.25cc	all	במבחנות	all includes 0.3mm but not less than 0.3mm			HLZ-45	A	1b/east section	1b
HLZ-6	A	1/03a	13	232.66	2015-01-02	במבחנות	שעורה, זית, קטנית		HLZ-5	A	1/03a	13	232.66	2015-01-02	1mm+=5cc, 0.5mm=1.8cc, 0.3=1.5cc	x>0.3	במבחנות				HLZ-46	A	1b/east section	1c
HLZ-8	A	1/04a	20	193.11-190.11	2015-02-02	במבחנות			HLZ-7	A	1/04a	20	193.11-190.11	2015-02-02	2mm+=30cc, 1mm=15cc, 0/5mm=12cc, 0.3mm=3.75cc	x>0.3	במבחנות				HLZ-47	A	1b/east section	1d
HLZ-19	A	1/05a	29	190.11	2015-02-02		3 שעורה														HLZ-48	A	1b/east section	2
HLZ-20	A	1/06a	33	181-168.11																	HLZ-49	A	1b/east section	3
HLZ-21	A	1/07a	41	168.11-158.11	2015-03-02																HLZ-50	A	1b/east section	4a
HLZ-22	A	1/07d	67	133.11	2015-05-02		תמרים בשקית														HLZ-51	A	1b/east section	4b
HLZ-23	A	1/08a	49	158.11-137.11																	HLZ-52	A	1b/east section	5a
HLZ-10	A	1/09a	54	137.11-123.11	2015-04-02	במבחנות			HLZ-9	A	1/09a	58	137.11-123.11	2015-04-02	80 cc	x>0.5, 2ccof 0.5	במבחנות				HLZ-53	A	1b/east section	5b
HLZ-24	A	1/10a	64	123.11-120.11	2015-05-02																HLZ-54	A	1b/east section	5c
HLZ-25	A	1/10b	57		2015-04-02		זיתים בשקית														HLZ-55	A	1b/east section	5d
HLZ-26	A	1/10c	66	115.11	2015-05-02		תמרים בשקית														HLZ-56	A	1b/east section	6a
HLZ-12	A	4/01a	8		2015-01-02	במבחנות	זית, שעורה, קטנית		HLZ-11	A	4/01a	8		2015-01-02	2 cc	all	במבחנות				HLZ-57	A	1b/east section	6b
HLZ-14	A	4/02a	16	216.9-206.9	2015-02-02	במבחנות	לא זרעים		HLZ-13	A	4/02a	16	216.9-206.9	2015-02-02	32 cc	x>0.5, 2ccof 0.5	במבחנות	שתי שקיות- עליון ותחתון
									HLZ-15	A	4/02a	25	206.9		28 cc	x>0.5, 2ccof 0.5	במבחנות
HLZ-2	A	4/04a	37			במבחנות			HLZ-1	A	4/04a	37				all	במבחנות	במבחנות
HLZ-16	A	4/05a	45	115	2015-04-02	במבחנות	המון חומר. חסרים 10 חרצני גפן שנשארו בחיפה		HLZ-17	A	4/05a	45	115	2015-04-02	50 cc	x>0.5, 2ccof 0.5	במבחנות	שתי שקיות- עליון ותחתון
HLZ-27	A	4/05b	46		2015-04-02				HLZ-18	A	4/05a	45				x>0.5, 2ccof 0.5	בצלחות	תחתון
HLZ-28	A	4/05c	47
HLZ-29	A	4/05d	48		2015-04-02		תמרים וזיתים
HLZ-30	A	4/06a	60				המון חומר
HLZ-31	A	4/07a	69	86.9
HLZ-32	A	4/07b	70		2015-05-02		אפרסק, זית, תמר
HLZ-33	A	column in east section-for dating samples	10		2015-09-02		שבר זית בשקית
HLZ-34	B	6/02a	78	231.38	2015-09-02		אולי זרע
HLZ-35	B	6/02b	79	231.58	2015-09-02		אולי זרע
אין זרעים	B	7/01a	82		2015-09-02		אין זרעים
HLZ-36	B	7/01b	83	200.00-167.00	2015-09-02		תמר
HLZ-37	B	7/01d	85		2015-09-02		זית
HLZ-38	B	7/02d	87	170.00-150.00	2015-09-02
HLZ-39	B	7/03c	94
HLZ-40	B	7/03d	91		2015-09-02
HLZ-41	B	7/04c	98				זית
HLZ-42	B	7/04d	95
HLZ-43	B	7/05d	99
