# Supplementary material for: Unprecedented yet gradual nature of first millennium CE intercontinental crop plant dispersal revealed in ancient Negev desert refuse
Source: eLife. 2023 Nov 27;12:e85118. doi: 10.7554/eLife.85118 (PMC10846859; doi:10.7554/eLife.85118)
Supplement: Table 4—source data 2. [file elife-85118-table4-data2.xlsx]

## Sheet: שטח A
Lab #	Site	Excavator	Archaeobotanist	Year analyzed	Area	Locus	Basket	Vial no.	מין הצמח	Plant Latin name	איבר	Organ	משפחה	Family	Quantity	Fraction size (mm)	Notes
SVT-158	Shivta	Tepper, Bar-Oz and Gini	Daniel Fuks	2016 & 2019	A	100	1019	1	חלמית	Malva sp.	פרודה	mericarp	חלמיתיים	Malvaceae	1	>0.3	לא מפוחם, כנראה רצנטי
SVT-158	Shivta	Tepper, Bar-Oz and Gini	Daniel Fuks	2016 & 2019	A	100	1019	2	אהל מצוי	Mesembryanthemum nodiflorum	זרע	seed	חיעדיים	Aizoaceae	2	>0.3	לא מפוחם, כנראה רצנטי
SVT-158	Shivta	Tepper, Bar-Oz and Gini	Daniel Fuks	2016 & 2019	A	100	1019	3	חמניה רצנטית	Helianthus annuus recent	קליפת זרעון	achene exocarp	מורכבים	Asteraceae	1	>0.3	לא מפוחם, כנראה רצנטי
SVT-158	Shivta	Tepper, Bar-Oz and Gini	Daniel Fuks	2016 & 2019	A	100	1019	4	בלתי-שונות	UNIDENTIFIED						>0.3	לא מפוחם, כנראה רצנטי
SVT-159	Shivta	Tepper, Bar-Oz and Gini	Daniel Fuks	2016 & 2019	A	102	1007	1	חלמית	Malva sp.	פרודה	mericarp	חלמיתיים	Malvaceae	1	>0.3	לא מפוחם, כנראה רצנטי
SVT-159	Shivta	Tepper, Bar-Oz and Gini	Daniel Fuks	2016 & 2019	A	102	1007	2	אהל מצוי	Mesembryanthemum nodiflorum	זרע	seed	חיעדיים	Aizoaceae	?	>0.3	לא מפוחם, כנראה רצנטי
SVT-159	Shivta	Tepper, Bar-Oz and Gini	Daniel Fuks	2016 & 2019	A	102	1007	3	בלתי	UNIDENTIFIED						>0.3	לא מפוחם, כנראה רצנטי
SVT-160	Shivta	Tepper, Bar-Oz and Gini	Daniel Fuks	2016 & 2019	A	130	1017	1	חרק	INSECT					3	>0.3	לא מפוחם, כנראה רצנטי
SVT-160	Shivta	Tepper, Bar-Oz and Gini	Daniel Fuks	2016 & 2019	A	103	1017	2	אהל מצוי	Mesembryanthemum nodiflorum	זרע	seed	חיעדיים	Aizoaceae	4	>0.3	לא מפוחם, כנראה רצנטי
SVT-160	Shivta	Tepper, Bar-Oz and Gini	Daniel Fuks	2016 & 2019	A	103	1017	3	בלתי-שונות	UNIDENTIFIED						>0.3	לא נספר
SVT-161	Shivta	Tepper, Bar-Oz and Gini	Daniel Fuks	2016 & 2019	A	102	1010	1	בקיים cf.	cf. Vicieae	זרע	seed	פרפרניים	Fabaceae	1	>0.3	מפוחם
SVT-161	Shivta	Tepper, Bar-Oz and Gini	Daniel Fuks	2016 & 2019	A	102	1010	2	חרק	INSECT					1	>0.3	לא מפוחם, כנראה רצנטי

## Sheet: שטח B
Lab #	Site	Excavator	Archaeobotanist	Year analyzed	Area	Locus	Basket	Floatation (Yes/No)	Vial no.	מין הצמח	Plant Latin name	איבר	Organ	משפחה	Family	Quantity	Fraction size (mm)	Notes
SVT-162	Shivta	Tepper, Bar-Oz and Gini	Daniel Fuks	2016 & 2019	B	200	2001	Yes	1	אמיך קוצני	Emex spinosa	פרי	fruit	ארכוביתיים	Polygonaceae	40	>0.3	לא מפוחם, אולי רצנטי
SVT-162	Shivta	Tepper, Bar-Oz and Gini	Daniel Fuks	2016 & 2019	B	200	2001	Yes	2	חיעד ספרדי	Aizoon hispanicum	זרע	seed	חיעדיים	Aizoaceae	1	>0.3	קשה לדעת אם קדום או לא. יש עליו סדימנט
SVT-162	Shivta	Tepper, Bar-Oz and Gini	Daniel Fuks	2016 & 2019	B	200	2001	Yes	3	מלעניאל מצוי	Stipa capensis	יחידת הפצה	dispersal unit	דגניים	Gramineae	2	>0.3	לא מפוחם, כנראה רצנטי
SVT-162	Shivta	Tepper, Bar-Oz and Gini	Daniel Fuks	2016 & 2019	B	200	2001	Yes	4	בן-שלח מנוצה	Erucaria microcarpa	מקור תרמיל	siliqua upper joint	מצליבים	Brassicaceae	2	>0.3	לאחד המקורים מחובר חצי תרמיל, לא מפוחם, כנראה רצנטי
SVT-162	Shivta	Tepper, Bar-Oz and Gini	Daniel Fuks	2016 & 2019	B	200	2001	Yes	5	כנפן קוצני-רצנטי	Pteranthus dichotomus	יחידת הפצה	dispersal unit	ציפורניים	Caryophyllaceae	2	>0.3	לא מפוחם, כנראה רצנטי
SVT-162	Shivta	Tepper, Bar-Oz and Gini	Daniel Fuks	2016 & 2019	B	200	2001	Yes	6	כפיות שעירות	Carrichtera annua	קליפת פרי	exocarp	מצליבים	Brassicaceae	16	>0.3	לא מפוחם, כנראה רצנטי
SVT-162	Shivta	Tepper, Bar-Oz and Gini	Daniel Fuks	2016 & 2019	B	200	2001	Yes	7	מלוח	Atriplex sp.	זרע, פרי, עלה	seed, fruit, leaves	סלקיים	Chenopodiaceae	10	>0.3	לא מפוחם, כנראה רצנטי. 10 זרעים
SVT-162	Shivta	Tepper, Bar-Oz and Gini	Daniel Fuks	2016 & 2019	B	200	2001	Yes	8	דורית רפה	Spergula fallax	זרע	seed	ציפורניים	Caryophyllaceae	10	>0.3	לא מפוחם, כנראה רצנטי
SVT-162	Shivta	Tepper, Bar-Oz and Gini	Daniel Fuks	2016 & 2019	B	200	2001	Yes	9	ציפורני החתול	Calendula sp.	זרעון	achene	מורכבים	Asteraceae	11	>0.3	לא מפוחם, כנראה רצנטי
SVT-162	Shivta	Tepper, Bar-Oz and Gini	Daniel Fuks	2016 & 2019	B	200	2001	Yes	10	חלמית קטנת פרחים/חדת אונות	Malva parviflora/oxyloba	פרודה	mericarp	חלמתיים	Malvaceae	עשרות-מאות	>0.3	לספור? זה רצנטי - לא לספור
SVT-162	Shivta	Tepper, Bar-Oz and Gini	Daniel Fuks	2016 & 2019	B	200	2001	Yes	11	חלמית קטנת פרחים/מצויה	Malva parviflora/nicaeensis	פרודה	mericarp	חלמתיים	Malvaceae	4	>0.3	לא מפוחם, כנראה רצנטי
SVT-162	Shivta	Tepper, Bar-Oz and Gini	Daniel Fuks	2016 & 2019	B	200	2001	Yes	12	אהל מצוי	Mesembryanthemum nodiflorum	זרע	seed	חיעדיים	Aizoaceae	עשרות-מאות	>0.3	לא מפוחם, כנראה רצנטי
SVT-162	Shivta	Tepper, Bar-Oz and Gini	Daniel Fuks	2016 & 2019	B	200	2001	Yes	13	צנון?		חלק תרמיל	siliqua segment	מצליבים?	Brassicaceae?	2	>0.3	לא מפוחם, כנראה רצנטי
SVT-162	Shivta	Tepper, Bar-Oz and Gini	Daniel Fuks	2016 & 2019	B	200	2001	Yes	14	פרח להגדרה						6	>0.3	לא מפוחם, כנראה רצנטי
SVT-162	Shivta	Tepper, Bar-Oz and Gini	Daniel Fuks	2016 & 2019	B	200	2001	Yes	15	להגדרה						4	>0.3	לא מפוחם, כנראה רצנטי
SVT-162	Shivta	Tepper, Bar-Oz and Gini	Daniel Fuks	2016 & 2019	B	200	2001	Yes	16	להגדרה						8	>0.3	לא מפוחם, כנראה רצנטי
SVT-162	Shivta	Tepper, Bar-Oz and Gini	Daniel Fuks	2016 & 2019	B	200	2001	Yes	17	שונות בר הגדרה						7	>0.3	לא מפוחם, כנראה רצנטי
SVT-162	Shivta	Tepper, Bar-Oz and Gini	Daniel Fuks	2016 & 2019	B	200	2001	Yes	18	בלתי	INSECT						>0.3	לא מפוחם, כנראה רצנטי
SVT-162	Shivta	Tepper, Bar-Oz and Gini	Daniel Fuks	2016 & 2019	B	200	2001	Yes	19	חרק	INSECT							לא מפוחם, כנראה רצנטי
SVT-163	Shivta	Tepper, Bar-Oz and Gini	Daniel Fuks	2016 & 2019	B	211	2043	Yes	1	חיטה/שעורה	Hordeum/Triticum	גרגיר	grain	דגניים	Gramineae	1	>0.3
SVT-163	Shivta	Tepper, Bar-Oz and Gini	Daniel Fuks	2016 & 2019	B	211	2043	Yes	2	חיטה/שעורה cf.	cf. Hordeum/Triticum	פרקי גבעול	culm node	דגניים	Gramineae	1	>0.3
SVT-163	Shivta	Tepper, Bar-Oz and Gini	Daniel Fuks	2016 & 2019	B	211	2043	Yes	3	חיטה/שעורה cf.	cf. Hordeum/Triticum	שבר מלען	awn fragment	דגניים	Gramineae	1	>0.3
SVT-163	Shivta	Tepper, Bar-Oz and Gini	Daniel Fuks	2016 & 2019	B	211	2043	Yes	4	פיקוס התאנה	Ficus carica	אגוזית	nutlet	תותיים	Moraceae	16	>0.3	אחד לא מפוחם
SVT-163	Shivta	Tepper, Bar-Oz and Gini	Daniel Fuks	2016 & 2019	B	211	2043	Yes	5	פיקוס התאנה?	Ficus carica?	אגוזית	nutlet	תותיים?	Moraceae?	3	>0.3
SVT-163	Shivta	Tepper, Bar-Oz and Gini	Daniel Fuks	2016 & 2019	B	211	2043	Yes	6	גרגרנית ערבית	Trigonella arabica	זרע	seed	פרפרניים	Fabaceae	1	>0.3
SVT-163	Shivta	Tepper, Bar-Oz and Gini	Daniel Fuks	2016 & 2019	B	211	2043	Yes	7	בן-שלח מנוצה	Erucaria microcarpa	מקור תרמיל	siliqua upper joint	מצליבים	Brassicaceae	1	>0.3
SVT-163	Shivta	Tepper, Bar-Oz and Gini	Daniel Fuks	2016 & 2019	B	211	2043	Yes	8	גפן	Vitis vinifera	אנדוספרם	endosperm	גפניים	Vitaceae	3	>0.3
SVT-163	Shivta	Tepper, Bar-Oz and Gini	Daniel Fuks	2016 & 2019	B	211	2043	Yes	9	חיעד ספרדי	Aizoon hispanicum	זרע	seed	חיעדיים	Aizoaceae	1	>0.3	רצנטי?
SVT-163	Shivta	Tepper, Bar-Oz and Gini	Daniel Fuks	2016 & 2019	B	211	2043	Yes	10	אהל מצוי	Mesembryanthemum nodiflorum	זרע	seed	חיעדיים	Aizoaceae	10	>0.3	רצנטי?
SVT-163	Shivta	Tepper, Bar-Oz and Gini	Daniel Fuks	2016 & 2019	B	211	2043	Yes	11	מורכבים		זרעון	achene	מורכבים	Asteraceae	1	>0.3	לא מפוחם
SVT-163	Shivta	Tepper, Bar-Oz and Gini	Daniel Fuks	2016 & 2019	B	211	2043	Yes	12	פרג	Papaver sp.	זרע	seed	פרגיים	Papaveraceae	1	>0.3
SVT-163	Shivta	Tepper, Bar-Oz and Gini	Daniel Fuks	2016 & 2019	B	211	2043	Yes	13	ליואל!						1	>0.3
SVT-163	Shivta	Tepper, Bar-Oz and Gini	Daniel Fuks	2016 & 2019	B	211	2043	Yes	14	בלתי ליואל						1	>0.3
SVT-163	Shivta	Tepper, Bar-Oz and Gini	Daniel Fuks	2016 & 2019	B	211	2043	Yes	15	לחך? ליואל						1	>0.3
SVT-163	Shivta	Tepper, Bar-Oz and Gini	Daniel Fuks	2016 & 2019	B	211	2043	Yes	16	בלתי- שונות						1	>0.3
SVT-163	Shivta	Tepper, Bar-Oz and Gini	Daniel Fuks	2016 & 2019	B	211	2043	Yes	17	בלתי						15	>0.3
SVT-163	Shivta	Tepper, Bar-Oz and Gini	Daniel Fuks	2016 & 2019	B	211	2043	Yes	18	שונות למיון והגדרה							>0.3	לא נספר
SVT-163	Shivta	Tepper, Bar-Oz and Gini	Daniel Fuks	2016 & 2019	B	211	2043	Yes	19	EMPTY							>0.3	לא נספר
SVT-164	Shivta	Tepper, Bar-Oz and Gini	Daniel Fuks	2016 & 2019	B	212	2045	Yes	1	חיטה/שעורה	Hordeum/Triticum	גרגיר	grain	דגניים	Gramineae	1	>0.3
SVT-164	Shivta	Tepper, Bar-Oz and Gini	Daniel Fuks	2016 & 2019	B	212	2045	Yes	2	חיטה/שעורה	Hordeum/Triticum	פרק ציר שיבולת	rachis fragment	דגניים	Gramineae	3	>0.3	קטן מאוד
SVT-164	Shivta	Tepper, Bar-Oz and Gini	Daniel Fuks	2016 & 2019	B	212	2045	Yes	3	בלתי						2	>0.3	דגני?
SVT-164	Shivta	Tepper, Bar-Oz and Gini	Daniel Fuks	2016 & 2019	B	212	2045	Yes	4	פיקוס התאנה	Ficus carica	אגוזית	nutlet	תותיים	Moraceae	13	>0.3
SVT-164	Shivta	Tepper, Bar-Oz and Gini	Daniel Fuks	2016 & 2019	B	212	2045	Yes	5	בן-שלח מנוצה	Erucaria microcarpa	מקור תרמיל	siliqua upper joint	מצליבים	Brassicaceae	1	>0.3
SVT-164	Shivta	Tepper, Bar-Oz and Gini	Daniel Fuks	2016 & 2019	B	212	2045	Yes	6	חיעד ספרדי	Aizoon hispanicum	זרע	seed	חיעדיים	Aizoaceae	1	>0.3
SVT-164	Shivta	Tepper, Bar-Oz and Gini	Daniel Fuks	2016 & 2019	B	212	2045	Yes	7	אהל מצוי	Mesembryanthemum nodiflorum	זרע	seed	חיעדיים	Aizoaceae	11	>0.3	4 מפוחמים
SVT-164	Shivta	Tepper, Bar-Oz and Gini	Daniel Fuks	2016 & 2019	B	212	2045	Yes	8	יבלית מצויה	Cynodon dactylon	גרגיר	grain	דגניים	Gramineae	1	>0.3
SVT-164	Shivta	Tepper, Bar-Oz and Gini	Daniel Fuks	2016 & 2019	B	212	2045	Yes	9	רכפה	Reseda sp.	זרע	seed	רכפתיים	Resedaceae	2	>0.3
SVT-164	Shivta	Tepper, Bar-Oz and Gini	Daniel Fuks	2016 & 2019	B	212	2045	Yes	10	זוגן השיח	Zygophyllum dumosum	זרע	seed	זוגניים	Zygophyllaceae		>0.3	לא מפוחם
SVT-164	Shivta	Tepper, Bar-Oz and Gini	Daniel Fuks	2016 & 2019	B	212	2045	Yes	11	בלתי שונות
SVT-165	Shivta	Tepper, Bar-Oz and Gini	Daniel Fuks	2016 & 2019	B	213	2049	Yes	1	פיקוס התאנה	Ficus carica	אגוזית	nutlet	תותיים	Moraceae	1	>0.3
SVT-165	Shivta	Tepper, Bar-Oz and Gini	Daniel Fuks	2016 & 2019	B	213	2049	Yes	2	אהל מצוי	Mesembryanthemum nodiflorum	זרע	seed	חיעדיים	Aizoaceae	3	>0.3	אחד מפוחם
SVT-165	Shivta	Tepper, Bar-Oz and Gini	Daniel Fuks	2016 & 2019	B	213	2049	Yes	3	קינואה רצנטית*	Chenopodium quinoa recent*	זרע	seed	ירבוזיים	Amaranthaceae	6	>0.3	*quinoa test for flotation and retrieval
SVT-165	Shivta	Tepper, Bar-Oz and Gini	Daniel Fuks	2016 & 2019	B	213	2049	Yes	4	בלתי						2	>0.3
SVT-166	Shivta	Tepper, Bar-Oz and Gini	Daniel Fuks	2016 & 2019	B	214	2053	Yes	1	שעורה שש-טורית	Hordeum vulgare hexastichum	פרק ציר שיבולת	rachis fragment	דגניים	Gramineae	1	>0.3
SVT-166	Shivta	Tepper, Bar-Oz and Gini	Daniel Fuks	2016 & 2019	B	214	2053	Yes	2	פיקוס התאנה	Ficus carica	אגוזית	nutlet	תותיים	Moraceae	2	>0.3
SVT-166	Shivta	Tepper, Bar-Oz and Gini	Daniel Fuks	2016 & 2019	B	214	2053	Yes	3	אהל מצוי	Mesembryanthemum nodiflorum	זרע	seed	חיעדיים	Aizoaceae	21	>0.3	לא מפוחם
SVT-166	Shivta	Tepper, Bar-Oz and Gini	Daniel Fuks	2016 & 2019	B	214	2053	Yes	4	קינואה רצנטית*	Chenopodium quinoa recent*	זרע	seed	ירבוזיים	Amaranthaceae	29	>0.3
SVT-166	Shivta	Tepper, Bar-Oz and Gini	Daniel Fuks	2016 & 2019	B	214	2053	Yes	5	בלתי- שונות							>0.3	לא נספר
SVT-167	Shivta	Tepper, Bar-Oz and Gini	Daniel Fuks	2016 & 2019	B	214	2076	Yes	1	שעורה	Hordeum sp.	פרק ציר שיבולת	rachis fragment	דגניים	Gramineae	1	>0.3
SVT-167	Shivta	Tepper, Bar-Oz and Gini	Daniel Fuks	2016 & 2019	B	214	2076	Yes	2	חלמית קטנת פרחים/חדת אונות	Malva parviflora/oxyloba	זרע	seed	חלמתיים	Malvaceae	1	>0.3
SVT-167	Shivta	Tepper, Bar-Oz and Gini	Daniel Fuks	2016 & 2019	B	214	2076	Yes	3	אהל מצוי	Mesembryanthemum nodiflorum	זרע	seed	חיעדיים	Aizoaceae	22	>0.3	לא מפוחם
SVT-167	Shivta	Tepper, Bar-Oz and Gini	Daniel Fuks	2016 & 2019	B	214	2076	Yes	4	חרק						1	>0.3
SVT-167	Shivta	Tepper, Bar-Oz and Gini	Daniel Fuks	2016 & 2019	B	214	2076	Yes	5	בלתי-שונות							>0.3	לא נספר

## Sheet: שטח D
Lab #	Site	Excavator	Archaeobotanist	Year analyzed	Area	Locus	Basket	Vial no.	מין הצמח	Plant Latin name	איבר	Organ	משפחה	Family	Quantity	Fraction size (mm)	Notes
SVT-168	Shivta	Tepper, Bar-Oz and Gini	Daniel Fuks	2016 & 2019	D	409	4065	1	חיטה	Triticum sp.	גרגיר	grain	דגניים	Gramineae	5
SVT-168	Shivta	Tepper, Bar-Oz and Gini	Daniel Fuks	2016 & 2019	D	409	4065	2	חיטה/שעורה	Hordeum/Triticum	גרגיר	grain	דגניים	Gramineae	2
SVT-168	Shivta	Tepper, Bar-Oz and Gini	Daniel Fuks	2016 & 2019	D	409	4065	3	שברי דגן		גרגיר	grain	דגניים	Gramineae			לא נספר
SVT-168	Shivta	Tepper, Bar-Oz and Gini	Daniel Fuks	2016 & 2019	D	409	4065	4	חיטה טטרפלוידית	Triticum turgidum s.l.	פרק ציר שיבולת	rachis fragment	דגניים	Gramineae	1
SVT-168	Shivta	Tepper, Bar-Oz and Gini	Daniel Fuks	2016 & 2019	D	409	4065	5	רכפה מגובששת?	cf. Reseda muricata	זרע	seed	רכפתיים	Resedaceae	1		להכריע בסוף
SVT-168	Shivta	Tepper, Bar-Oz and Gini	Daniel Fuks	2016 & 2019	D	409	4065	6	פיקוס התאנה	Ficus carica	אגוזית	nutlet	תותיים	Moraceae	1
SVT-168	Shivta	Tepper, Bar-Oz and Gini	Daniel Fuks	2016 & 2019	D	409	4065	7	אהל מצוי	Mesembryanthemum nodiflorum	זרע	seed	חיעדיים	Aizoaceae	11
SVT-168	Shivta	Tepper, Bar-Oz and Gini	Daniel Fuks	2016 & 2019	D	409	4065	8	מתנן שעיר?	cf. Thymelaea hirsuta	ניצן	bud	מתנניים	Thymelaeaceae	1		להכריע בסוף
SVT-168	Shivta	Tepper, Bar-Oz and Gini	Daniel Fuks	2016 & 2019	D	409	4065	9	מלוח?	Atriplex sp.	זרע	seed	סלקיים	Chenopodiaceae	1		לנסות להגדיר
SVT-168	Shivta	Tepper, Bar-Oz and Gini	Daniel Fuks	2016 & 2019	D	409	4065	10	קחוון?	Anthemis?	זרעון	achene	מורכבים	Asteraceae	1
SVT-168	Shivta	Tepper, Bar-Oz and Gini	Daniel Fuks	2016 & 2019	D	409	4065	11	בלתי ליואל						1
SVT-168	Shivta	Tepper, Bar-Oz and Gini	Daniel Fuks	2016 & 2019	D	409	4065	12	בלתי-שונות								לא נספר
SVT-168	Shivta	Tepper, Bar-Oz and Gini	Daniel Fuks	2016 & 2019	D	409	4065	13	דג קשקש						1
SVT-169	Shivta	Tepper, Bar-Oz and Gini	Daniel Fuks	2016 & 2019	D	415	4093	1	שעורה שש-טורית	Hordeum vulgare hexastichum	פרק ציר שיבולת	rachis fragment	דגניים	Gramineae	2
SVT-169	Shivta	Tepper, Bar-Oz and Gini	Daniel Fuks	2016 & 2019	D	415	4093	2	שעורה	Hordeum vulgare	פרק ציר שיבולת	rachis fragment	דגניים	Gramineae	3
SVT-169	Shivta	Tepper, Bar-Oz and Gini	Daniel Fuks	2016 & 2019	D	415	4093	3	חיטה טטרפלוידית	Triticum turgidum s.l.	פרק ציר שיבולת	rachis fragment	דגניים	Gramineae	4
SVT-169	Shivta	Tepper, Bar-Oz and Gini	Daniel Fuks	2016 & 2019	D	415	4093	4	דגני	Gramineae	פרק ציר שיבולת	rachis fragment	דגניים	Gramineae	10
SVT-169	Shivta	Tepper, Bar-Oz and Gini	Daniel Fuks	2016 & 2019	D	415	4093	5	דגני להגדרה	Gramineae	גרגיר	grain	דגניים	Gramineae	1
SVT-169	Shivta	Tepper, Bar-Oz and Gini	Daniel Fuks	2016 & 2019	D	415	4093	6	דגני	Gramineae	שבר מלען	awn fragment	דגניים	Gramineae	2		שני שברים
SVT-169	Shivta	Tepper, Bar-Oz and Gini	Daniel Fuks	2016 & 2019	D	415	4093	7	חיטה/שעורה cf.	cf. Hordeum/Triticum	פרקי גבעול	culm node	דגניים	Gramineae	2
SVT-169	Shivta	Tepper, Bar-Oz and Gini	Daniel Fuks	2016 & 2019	D	415	4093	8	פיקוס התאנה	Ficus carica	אגוזית	nutlet	תותיים	Moraceae	4
SVT-169	Shivta	Tepper, Bar-Oz and Gini	Daniel Fuks	2016 & 2019	D	415	4093	9	מתנן שעיר	Thymelaea hirsuta?	עלה	leaf	מתנניים	Thymelaeaceae	3
SVT-169	Shivta	Tepper, Bar-Oz and Gini	Daniel Fuks	2016 & 2019	D	415	4093	10	קחוון?	Anthemis?	זרעון	achene	מורכבים	Asteraceae	1
SVT-169	Shivta	Tepper, Bar-Oz and Gini	Daniel Fuks	2016 & 2019	D	415	4093	11	אהל מצוי	Mesembryanthemum nodiflorum	זרע	seed	חיעדיים	Aizoaceae	4		לא מפוחם
SVT-169	Shivta	Tepper, Bar-Oz and Gini	Daniel Fuks	2016 & 2019	D	415	4093	12	יבלית מצויה	Cynodon dactylon	גרגיר	grain	דגניים	Gramineae	1
SVT-169	Shivta	Tepper, Bar-Oz and Gini	Daniel Fuks	2016 & 2019	D	415	4093	13	ליואל
SVT-169	Shivta	Tepper, Bar-Oz and Gini	Daniel Fuks	2016 & 2019	D	415	4093	14	רצנטי?	recent?
SVT-169	Shivta	Tepper, Bar-Oz and Gini	Daniel Fuks	2016 & 2019	D	415	4093	15	בלתי-שונות								לא נספר
SVT-170	Shivta	Tepper, Bar-Oz and Gini	Daniel Fuks	2016 & 2019	D	419	4108	1	חיטה/שעורה	Hordeum/Triticum	גרגיר	grain	דגניים	Gramineae	4
SVT-170	Shivta	Tepper, Bar-Oz and Gini	Daniel Fuks	2016 & 2019	D	419	4108	2	דגני		בסיס פרח	lemma callus	דגניים	Gramineae
SVT-170	Shivta	Tepper, Bar-Oz and Gini	Daniel Fuks	2016 & 2019	D	419	4108	3	דגני	Gramineae	גרגיר	grain	דגניים	Gramineae	1
SVT-170	Shivta	Tepper, Bar-Oz and Gini	Daniel Fuks	2016 & 2019	D	419	4108	4	דגני	Gramineae	פרק ציר שיבולת	rachis fragment	דגניים	Gramineae	1
SVT-170	Shivta	Tepper, Bar-Oz and Gini	Daniel Fuks	2016 & 2019	D	419	4108	5	דגני	Gramineae	שבר מלען	awn fragment	דגניים	Gramineae	2	0.5
SVT-170	Shivta	Tepper, Bar-Oz and Gini	Daniel Fuks	2016 & 2019	D	419	4108	6	אהל מצוי	Mesembryanthemum nodiflorum	זרע	seed	חיעדיים	Aizoaceae	1	0.5	מפוחם
SVT-170	Shivta	Tepper, Bar-Oz and Gini	Daniel Fuks	2016 & 2019	D	419	4108	7	חלמית קטנת פרחים/חדת אונות- רצנטי?	Malva parviflora/oxyloba-recent?	פרודה	mericarp	חלמתיים	Malvaceae	1		לא מפוחם
SVT-170	Shivta	Tepper, Bar-Oz and Gini	Daniel Fuks	2016 & 2019	D	419	4108	8	קחוון?	Anthemis?	זרעון	achene	מורכבים	Asteraceae	1	0.5
SVT-170	Shivta	Tepper, Bar-Oz and Gini	Daniel Fuks	2016 & 2019	D	419	4108	9	בלתי-שונות							1	לא נספר
SVT-170	Shivta	Tepper, Bar-Oz and Gini	Daniel Fuks	2016 & 2019	D	419	4108	10	בלתי-שונות							0.5	לא נספר

## Sheet: שטח E
Lab #	Site	Excavator	Archaeobotanist	Year analyzed	Area	Locus	Basket	Floatation (Yes/No)	Sediment Volume (liter)	Group	Vial no.	מין הצמח	Plant Latin name	איבר	Organ	משפחה	Family	Light Fraction Quantity	Heavy Fraction - Quantity	Quantity calculated	Quantity	Light-Fraction size (mm)	Heavy-Fraction size (mm)	Dry sift Sieve size	Notes
SVT-4	Shivta	Tepper, Bar-Oz and Gini	Daniel Fuks	2016-2017	E	501	5102	Yes	3		110	דמומית משוננת	Adonis dentata	פרודה	mericarp	נוריתיים	Ranunculaceae	1		1		1+			עוד אחד במבחנה לא בטוח מתחבר ולכן לא נספר
SVT-1	Shivta	Tepper, Bar-Oz and Gini	Daniel Fuks	2016-2017	E	500	5003	Yes	3	1	2	חיטה	Triticum	גרגיר	grain	דגניים	Gramineae	11	2	13	13	1mm+	2		טיפוסים שונים		7 של 2מ"מ
SVT-1	Shivta	Tepper, Bar-Oz and Gini	Daniel Fuks	2016-2017	E	500	5003	Yes	3		30	דמומית משוננת/קטנת פרי	Adonis dentata/microcarpa	פרודה	mericarp	נוריתיים	Ranunculaceae	1		1		1mm+
SVT-1	Shivta	Tepper, Bar-Oz and Gini	Daniel Fuks	2016-2017	E	500	5003	Yes	3		25	חיעד ספרדי	Aizoon hispanicum	זרע	seed	חיעדיים	Aizoaceae	1		1		1mm+
SVT-1	Shivta	Tepper, Bar-Oz and Gini	Daniel Fuks	2016-2017	E	500	5003	Yes	3	1	5	חיטה	Triticum	גרגיר	grain	דגניים	Gramineae	2		2	2	1mm			להגדרה במגדיר. בן חיטה ביצני?, חיטה קטנת-גרגיר?
SVT-13	Shivta	Tepper, Bar-Oz and Gini	Daniel Fuks	2016-2018	E	503	5039	Yes	3		21	חיעד ספרדי	Aizoon hispanicum	זרע		חיעדיים	Aizoaceae	2		2		2
SVT-1	Shivta	Tepper, Bar-Oz and Gini	Daniel Fuks	2016-2017	E	500	5003	Yes	3	1	7	דגני		גרגיר	grain	דגניים	Gramineae	1		1		1mm			לנסות להגדיר או לחכות לעוד
SVT-1	Shivta	Tepper, Bar-Oz and Gini	Daniel Fuks	2016-2017	E	500	5003	Yes	3	1	8	שיבולת שועל?	Avena sp.?	גרגיר	grain	דגניים	Gramineae	2		2		2mm
SVT-1	Shivta	Tepper, Bar-Oz and Gini	Daniel Fuks	2016-2017	E	500	5003	Yes	3	1	9	דגני?		גרגיר?	grain?	דגניים	Gramineae?	1		1		1mm+			יואל: לא בטוח דגני. דניאל: ברומית?
SVT-1	Shivta	Tepper, Bar-Oz and Gini	Daniel Fuks	2016-2017	E	500	5003	Yes	3	1	10	חיטה/שעורה		גרגיר	grain	דגניים	Gramineae		2	2	2	1mm+	2
SVT-1	Shivta	Tepper, Bar-Oz and Gini	Daniel Fuks	2016-2017	E	500	5003	Yes	3	1	11			שברי מלען	awn fragments	דגניים	Gramineae					1mm+
SVT-1	Shivta	Tepper, Bar-Oz and Gini	Daniel Fuks	2016-2017	E	500	5003	Yes	3	1	12			פרקי גבעול	culm nodes	דגניים	Gramineae	3		3		1mm+
SVT-1	Shivta	Tepper, Bar-Oz and Gini	Daniel Fuks	2016-2017	E	500	5003	Yes	3	1	13			חלקי שדרה	rachis fragments	דגניים	Gramineae	93		93		1mm+
SVT-14	Shivta	Tepper, Bar-Oz and Gini	Daniel Fuks	2016-2018	E	504	5029	Yes	3		19	חיעד ספרדי	Aizoon hispanicum	זרע	seed	חיעדיים	Aizoaceae	1		1		1+
SVT-1	Shivta	Tepper, Bar-Oz and Gini	Daniel Fuks	2016-2017	E	500	5003	Yes	3		15	בלתי		זרע	seed			2		2		1mm+			להגדיר בהמשך
SVT-1	Shivta	Tepper, Bar-Oz and Gini	Daniel Fuks	2016-2017	E	500	5003	Yes	3		16	בלתי		זרע	seed			2		2		1mm+			חיטה? בקיי? אולי עבר בקיבה?
SVT-1	Shivta	Tepper, Bar-Oz and Gini	Daniel Fuks	2016-2017	E	500	5003	Yes	3		17	בלתי		זרע	seed	פרפרניים	Fabaceae	1		1		1mm+			יואל: תורמוס אפשרי, יש דגם מתחת לקליפה. לחכות
SVT-2	Shivta	Tepper, Bar-Oz and Gini	Daniel Fuks	2016-2017	E	501	5006	Yes	3		33	חיעד ספרדי	Aizoon hispanicum	זרע בגלל	seed	חיעדיים	Aizoaceae	2		2		1mm+			לוודא
SVT-3	Shivta	Tepper, Bar-Oz and Gini	Daniel Fuks	2016-2017	E	501	5097	Yes	3		61	חיעד ספרדי	Aizoon hispanicum	זרע	seed	חיעדיים	Aizoaceae	2		2		1mm+
SVT-4	Shivta	Tepper, Bar-Oz and Gini	Daniel Fuks	2016-2017	E	501	5102	Yes	3		84	חיעד ספרדי	Aizoon hispanicum	זרע	seed	חיעדיים	Aizoaceae	1		1		1+
SVT-1	Shivta	Tepper, Bar-Oz and Gini	Daniel Fuks	2016-2017	E	500	5003	Yes	3		21	קדד? גרגרנית?		זרע	seed	פרפרניים	Fabaceae	6		6		1mm+
SVT-4	Shivta	Tepper, Bar-Oz and Gini	Daniel Fuks	2016-2017	E	501	5102	Yes	3		197	חיעד ספרדי	Aizoon hispanicum	זרע	seed	חיעדיים	Aizoaceae	2		2		0.5
SVT-1	Shivta	Tepper, Bar-Oz and Gini	Daniel Fuks	2016-2017	E	500	5003	Yes	3		23	אספסת?		זרע	seed	פרפרניים	Fabaceae	32		32		1mm+
SVT-8	Shivta	Tepper, Bar-Oz and Gini	Daniel Fuks	2016-2018	E	502	5010	Yes	3		17	חיעד ספרדי	Aizoon hispanicum	זרע	seed	חיעדיים	Aizoaceae	1		1		0.3+
SVT-4	Shivta	Tepper, Bar-Oz and Gini	Daniel Fuks	2016-2017	E	501	5102	Yes	3		205	מרגנית השדה	Anagallis arvensis	זרע	seed	רקפתיים	Primulaceae	2		2		0.5			לא מרגנית קטנה בגלל תפוצה
SVT-1	Shivta	Tepper, Bar-Oz and Gini	Daniel Fuks	2016-2017	E	500	5003	Yes	3		26	גלעינית/ארנבית להגדרה		זרע	seed	זיפניים	Boraginaceae	1		1		1mm+
SVT-1	Shivta	Tepper, Bar-Oz and Gini	Daniel Fuks	2016-2017	E	500	5003	Yes	3		27	בר-עכנאי?		זרע	seed	זיפניים	Boraginaceae	1		1		1mm+
SVT-1	Shivta	Tepper, Bar-Oz and Gini	Daniel Fuks	2016-2017	E	500	5003	Yes	3		28	זערורית?	Telmissa microcarpa?	זרע	seed	טבוריתיים?	Crassulaceae?	1		1		1mm+
SVT-1	Shivta	Tepper, Bar-Oz and Gini	Daniel Fuks	2016-2017	E	500	5003	Yes	3		29	ארכוביתי?				ארכוביתיים						1mm+			ארכוביתית, חומעה
SVT-1	Shivta	Tepper, Bar-Oz and Gini	Daniel Fuks	2016-2017	E	500	5003	Yes	3		24	קחוון מצוי	Anthemis pseudocotula	זרעון	achene	מורכבים	Asteraceae	1		1		1mm+
SVT-1	Shivta	Tepper, Bar-Oz and Gini	Daniel Fuks	2016-2017	E	500	5003	Yes	3		31	בלתי		זרע	seed			1		1		1mm+			בדקתי זוגניים בעקבות המלצה של יואל, ללא להצלחה
SVT-1	Shivta	Tepper, Bar-Oz and Gini	Daniel Fuks	2016-2017	E	500	5003	Yes	3		32	בלתי		זרע	seed			1		1		1mm+			בדקתי שושניים ומצליבים בעקבות המלצה של יואל, ללא להצלחה. לחזור לזה
SVT-1	Shivta	Tepper, Bar-Oz and Gini	Daniel Fuks	2016-2017	E	500	5003	Yes	3		33	בלתי		זרע	seed			1		1		1mm+			יואל: לא פרפרני
SVT-4	Shivta	Tepper, Bar-Oz and Gini	Daniel Fuks	2016-2017	E	501	5102	Yes	3		97	קחוון מצוי	Anthemis pseudocotula	מצעית פורה		מורכבים	Asteraceae					1+
SVT-1	Shivta	Tepper, Bar-Oz and Gini	Daniel Fuks	2016-2017	E	500	5003	Yes	3		35	בלתי						1		1		1mm+
SVT-1	Shivta	Tepper, Bar-Oz and Gini	Daniel Fuks	2016-2017	E	500	5003	Yes	3		36	בלתי										1mm+
SVT-1	Shivta	Tepper, Bar-Oz and Gini	Daniel Fuks	2016-2017	E	500	5003	Yes	3		37	בלתי		תרמיל	pod			1		1		1mm+			לא להתעסק
SVT-1	Shivta	Tepper, Bar-Oz and Gini	Daniel Fuks	2016-2017	E	500	5003	Yes	3		38	בלתי						1		1		1mm+			יואל:לחכות
SVT-1	Shivta	Tepper, Bar-Oz and Gini	Daniel Fuks	2016-2017	E	500	5003	Yes	3		39	בלתי						1		1		1mm+			יואל: מעניין אך חצי
SVT-1	Shivta	Tepper, Bar-Oz and Gini	Daniel Fuks	2016-2017	E	500	5003	Yes	3		40	בלתי						3		3		1mm+			יואל: להמתין ולצרף
SVT-1	Shivta	Tepper, Bar-Oz and Gini	Daniel Fuks	2016-2017	E	500	5003	Yes	3		41	בלתי						1		1		1mm+
SVT-1	Shivta	Tepper, Bar-Oz and Gini	Daniel Fuks	2016-2017	E	500	5003	Yes	3		42	דגני		גרגיר	grain	דגניים	Gramineae	1		1		1mm+
SVT-1	Shivta	Tepper, Bar-Oz and Gini	Daniel Fuks	2016-2017	E	500	5003	Yes	3		43	בלתי										1mm+
SVT-1	Shivta	Tepper, Bar-Oz and Gini	Daniel Fuks	2016-2017	E	500	5003	Yes	3		44	בלתי										1mm+
SVT-1	Shivta	Tepper, Bar-Oz and Gini	Daniel Fuks	2016-2017	E	500	5003	Yes	3		45	בלתי										1mm+
SVT-1	Shivta	Tepper, Bar-Oz and Gini	Daniel Fuks	2016-2017	E	500	5003	Yes	3		46	בלתי-שונות										1mm+	2
SVT-1	Shivta	Tepper, Bar-Oz and Gini	Daniel Fuks	2016-2017	E	500	5003	Yes	3		47	מלוח?	Atriplex?									1mm+			רצנטי כנראה
SVT-1	Shivta	Tepper, Bar-Oz and Gini	Daniel Fuks	2016-2017	E	500	5003	Yes	3		48			עלה	leaf							1mm+			רצנטי כנראה
SVT-1	Shivta	Tepper, Bar-Oz and Gini	Daniel Fuks	2016-2017	E	500	5003	Yes	3		49	גללים										1mm+	2
SVT-1	Shivta	Tepper, Bar-Oz and Gini	Daniel Fuks	2016-2017	E	500	5003	Yes	3		50	דגני להגדרה		גרגיר	grain	דגניים	Gramineae	5		5		1mm+			ברומית? זון?
SVT-1	Shivta	Tepper, Bar-Oz and Gini	Daniel Fuks	2016-2017	E	500	5003	Yes	3		51	דגני		גרגיר	grain	דגניים	Gramineae	9		9		1mm+			some mixing of this and above with SVT-2 possible
SVT-10	Shivta	Tepper, Bar-Oz and Gini	Daniel Fuks	2016-2018	E	503	5016	Yes	3		31	סוככי	Apiaceae	זרע	seed			1		1	1	1			להגדרה
SVT-4	Shivta	Tepper, Bar-Oz and Gini	Daniel Fuks	2016-2017	E	501	5102	Yes	3		216	להגדרה בהמשך - סוככי	Apiaceae			סוככיים	Umbelliferae	1		1		0.5			מחברת 2 עמ' 27
SVT-11	Shivta	Tepper, Bar-Oz and Gini				503	5018				27	ארנבית שרועה	Arnebia decumbens					1		1	1
SVT-1	Shivta	Tepper, Bar-Oz and Gini	Daniel Fuks	2016-2017	E	500	5003	Yes	3		55	לחך?										1mm+
SVT-1	Shivta	Tepper, Bar-Oz and Gini	Daniel Fuks	2016-2017	E	500	5003	Yes	3		56	בלתי						6		6		1mm+
SVT-1	Shivta	Tepper, Bar-Oz and Gini	Daniel Fuks	2016-2017	E	500	5003	Yes	3		57	בלתי				פרפרניי?		1		1		1mm+
SVT-1	Shivta	Tepper, Bar-Oz and Gini	Daniel Fuks	2016-2017	E	500	5003	Yes	3		58	להגדרה										1mm+			מלוח??
SVT-1	Shivta	Tepper, Bar-Oz and Gini	Daniel Fuks	2016-2017	E	500	5003	Yes	3		59	אספרגולה?						8		8		1mm+			רצנטי?
SVT-13	Shivta	Tepper, Bar-Oz and Gini				503	5039				49	ארנבית שרועה	Arnebia decumbens					3		3	3	<2
SVT-1	Shivta	Tepper, Bar-Oz and Gini	Daniel Fuks	2016-2017	E	500	5003	Yes	3		61	חלמית	Malva									1mm+			רצנטי?
SVT-1	Shivta	Tepper, Bar-Oz and Gini	Daniel Fuks	2016-2017	E	500	5003	Yes	3		62	שונות -רצנטי?										1mm+			רצנטי?
SVT-1	Shivta	Tepper, Bar-Oz and Gini	Daniel Fuks	2016-2017	E	500	5003	Yes	3		63	זית		קשווה					1				2
SVT-1	Shivta	Tepper, Bar-Oz and Gini	Daniel Fuks	2016-2017	E	500	5003	Yes	3		64	cf. רימון מצוי	cf. Punica granatum	שבר זרע	seed fragment						1
SVT-1	Shivta	Tepper, Bar-Oz and Gini	Daniel Fuks	2016-2017	E	500	5003	Yes	3		65	שן ועצם
SVT-4	Shivta	Tepper, Bar-Oz and Gini	Daniel Fuks	2016-2017	E	501	5102	Yes	3		104	ארנבית שרועה	Arnebia decumbens	זרע	seed	זיפניים	Boraginaceae	4		4		1+
SVT-10	Shivta	Tepper, Bar-Oz and Gini	Daniel Fuks	2016-2018	E	503	5016	Yes	3		41	עירית צרת-עלים/נבובה	Asphodelus tenuifolius/fistulosus	זרע	seed			1		1	1	1					7 של 2מ"מ
SVT-10	Shivta	Tepper, Bar-Oz and Gini	Daniel Fuks	2016-2018	E	503	5016	Yes	3		3			פרק גבעול	culm node	דגניים	Gramineae	17		17		1+					4של 2מ"מ+
SVT-10	Shivta	Tepper, Bar-Oz and Gini	Daniel Fuks	2016-2018	E	503	5016	Yes	3		4			שורשים	roots	דגניים	Gramineae	9		9		1+
SVT-11	Shivta	Tepper, Bar-Oz and Gini				503	5018				30	עירית צרת-עלים/נבובה	Asphodelus tenuifolius/fistulosus	זרע	Asphodelus tenuifolius/fistulosus			1		1	1
SVT-10	Shivta	Tepper, Bar-Oz and Gini	Daniel Fuks	2016-2018	E	503	5016	Yes	3		6			שברי גרגיר	grain fragments	דגניים	Gramineae					1+
SVT-13	Shivta	Tepper, Bar-Oz and Gini				503	5039				78	עירית צרת-עלים/נבובה	Asphodelus tenuifolius/fistulosus	זרע	seed			3		3	3	<2
SVT-10	Shivta	Tepper, Bar-Oz and Gini	Daniel Fuks	2016-2018	E	503	5016	Yes	3		8	אספסת	Medicago	תרמיל	pod	פרפרניים	Fabaceae	1		1		1+
SVT-140	Shivta	Tepper, Bar-Oz and Gini	Daniel Fuks	2016-2017	E	504	5029	No	3		69	עירית צרת-עלים/נבובה	Asphodelus tenuifolius/fistulosus	זרע	seed					3	3			1
SVT-3	Shivta	Tepper, Bar-Oz and Gini	Daniel Fuks	2016-2017	E	501	5097	Yes	3		54	עירית צרת-עלים/נבובה	Asphodelus tenuifolius/fistulosus	זרע	seed							1mm+
SVT-10	Shivta	Tepper, Bar-Oz and Gini	Daniel Fuks	2016-2018	E	503	5016	Yes	3		11	בלתי - ליואל										1+
SVT-10	Shivta	Tepper, Bar-Oz and Gini	Daniel Fuks	2016-2018	E	503	5016	Yes	3		12	תלתן?		זרע	seed	פרפרניים	Fabaceae	1		1		1+
SVT-10	Shivta	Tepper, Bar-Oz and Gini	Daniel Fuks	2016-2018	E	503	5016	Yes	3		13	כף-אווז?										1+
SVT-10	Shivta	Tepper, Bar-Oz and Gini	Daniel Fuks	2016-2018	E	503	5016	Yes	3		14	בלתי לחבר				שושניים?		1		1		1+
SVT-4	Shivta	Tepper, Bar-Oz and Gini	Daniel Fuks	2016-2017	E	501	5102	Yes	3		89	עירית צרת-עלים/נבובה	Asphodelus tenuifolius/fistulosus	זרע	seed	שושניים	Liliaceae	1		1		1+
SVT-10	Shivta	Tepper, Bar-Oz and Gini	Daniel Fuks	2016-2018	E	503	5016	Yes	3		16	בלתי-שונות										1+	2
SVT-10	Shivta	Tepper, Bar-Oz and Gini	Daniel Fuks	2016-2018	E	503	5016	Yes	3		17	גלל										1+	2
SVT-10	Shivta	Tepper, Bar-Oz and Gini	Daniel Fuks	2016-2018	E	503	5016	Yes	3		18	חיטה/שעורה	Hordeum/Triticum	גרגיר	grain	דגניים	Gramineae		2	2	2		2
SVT-4	Shivta	Tepper, Bar-Oz and Gini	Daniel Fuks	2016-2017	E	501	5102	Yes	3	2	67	cf. קדד	Astragalus cf.	זרע	seed	פרפרניים	Fabaceae	2		2		1+
SVT-4	Shivta	Tepper, Bar-Oz and Gini	Daniel Fuks	2016-2017	E	501	5102	Yes	3		102	קדד האנקולים/מדברי	Astragalus hamosus/arpilobus	זרע	seed	פרפרניים	Fabaceae	7		7		1+
SVT-4	Shivta	Tepper, Bar-Oz and Gini	Daniel Fuks	2016-2017	E	501	5102	Yes	3		136	קדד	Astragalus sp.	זרע	seed	פרפרניים	Fabaceae	1		1		1+
SVT-4	Shivta	Tepper, Bar-Oz and Gini	Daniel Fuks	2016-2017	E	501	5102	Yes	3	1	168	קדד	Astragalus sp.	זרע	seed	פרפרניים	Fabaceae	1		1		0.5
SVT-10	Shivta	Tepper, Bar-Oz and Gini	Daniel Fuks	2016-2018	E	503	5016	Yes	3		23	גפן?	Vitis vinifera?	?זג	grape skin?			1		1	1	1
SVT-4	Shivta	Tepper, Bar-Oz and Gini	Daniel Fuks	2016-2017	E	501	5102	Yes	3	2	169	קדד	Astragalus sp.	זרע	seed	פרפרניים	Fabaceae	11		11		0.5
SVT-10	Shivta	Tepper, Bar-Oz and Gini	Daniel Fuks	2016-2018	E	503	5016	Yes	3		25	גרגרנית ערבית?		זרע	seed			5		5	5	1
SVT-10	Shivta	Tepper, Bar-Oz and Gini	Daniel Fuks	2016-2018	E	503	5016	Yes	3		26	אספסת	Medicago	זרע	seed			9		9	9	1
SVT-10	Shivta	Tepper, Bar-Oz and Gini	Daniel Fuks	2016-2018	E	503	5016	Yes	3		27	צנון cf	cf. Raphanus raphanistrum	זרע	seed			1		1	1	1
SVT-10	Shivta	Tepper, Bar-Oz and Gini	Daniel Fuks	2016-2018	E	503	5016	Yes	3		33	קדד/גרגקנית	Astragalus/Trigonella	זרע	seed			2		2	2	1
SVT-10	Shivta	Tepper, Bar-Oz and Gini	Daniel Fuks	2016-2018	E	503	5016	Yes	3		29	ליואל		זרע	seed			9		9	9	1
SVT-10	Shivta	Tepper, Bar-Oz and Gini	Daniel Fuks	2016-2018	E	503	5016	Yes	3		30	ציפרנית?	Silene?	זרע	seed			1		1	1	1
SVT-4	Shivta	Tepper, Bar-Oz and Gini	Daniel Fuks	2016-2017	E	501	5102	Yes	3	2	171	קדד/גרגרנית	Astragalus/Trigonella	זרע	seed	פרפרניים	Fabaceae	1		1		0.5
SVT-10	Shivta	Tepper, Bar-Oz and Gini	Daniel Fuks	2016-2018	E	503	5016	Yes	3		28	מלוח	Atriplex	זרע	seed			1		1	1	1
SVT-13	Shivta	Tepper, Bar-Oz and Gini				503	5039				76	מלוח	Atriplex					43		43	43	<2
SVT-16	Shivta	Tepper, Bar-Oz and Gini	Daniel Fuks	2016-2017	E	505	5037	Yes	3		23	מלוח קטן-עלים	Atriplex glauca	פרי	fruit	סלקיים	Chenopodiaceae	2		2		1+
SVT-10	Shivta	Tepper, Bar-Oz and Gini	Daniel Fuks	2016-2018	E	503	5016	Yes	3		35	חלמית	Malva	זרע	seed			8		8	8	1
SVT-4	Shivta	Tepper, Bar-Oz and Gini	Daniel Fuks	2016-2017	E	501	5102	Yes	3	1	14	שיבולת שועל מתפרקת	Avena barbata	גרגיר	grain	דגניים	Gramineae	1		1		1mm+
SVT-10	Shivta	Tepper, Bar-Oz and Gini	Daniel Fuks	2016-2018	E	503	5016	Yes	3		37	אשל הפרקים?	Tamarix aphylla?	זרע	seed			1		1	1	1
SVT-13	Shivta	Tepper, Bar-Oz and Gini	Daniel Fuks	2016-2018	E	503	5039	Yes	3		13	שיבולת שועל	Avena sp.	גרגיר		דגניים	Gramineae	4		4		2
SVT-13	Shivta	Tepper, Bar-Oz and Gini				503	5039				61	שיבולת שועל	Avena sp.	פרק ציר שיבולת				2		2	2	<2
SVT-4	Shivta	Tepper, Bar-Oz and Gini	Daniel Fuks	2016-2017	E	501	5102	Yes	3	1	124	שיבולת שועל	Avena sp.	גרגיר עטוי, בסיס פרח תחתון	fertile floret, lemma base/rachilla node	דגניים	Gramineae	2		2		1+
SVT-4	Shivta	Tepper, Bar-Oz and Gini	Daniel Fuks	2016-2017	E	501	5102	Yes	3		251	שיבולת שועל	Avena sp.	גרגיר	grain	דגניים	Gramineae	1		1		1
SVT-4	Shivta	Tepper, Bar-Oz and Gini	Daniel Fuks	2016-2017	E	501	5102	Yes	3	1	40	שיבולת שועל נפוצה	Avena sterilis	בסיס פרח ראשון	basal floret rachilla	דגניים	Gramineae	1		1		1mm+
SVT-10	Shivta	Tepper, Bar-Oz and Gini	Daniel Fuks	2016-2018	E	503	5016	Yes	3		43	זרעון מורכבים		זרעון	achene	מורכבים	Asteraceae	1		1	1	1
SVT-11	Shivta	Tepper, Bar-Oz and Gini				503	5018				25	עוקצר מצוי	Brachypodium distachyon					4		4	4
SVT-10	Shivta	Tepper, Bar-Oz and Gini	Daniel Fuks	2016-2018	E	503	5016	Yes	3		45	שיבולת שועל?	Avena?					2		2	2	1
SVT-10	Shivta	Tepper, Bar-Oz and Gini	Daniel Fuks	2016-2018	E	503	5016	Yes	3		46	חלקי שדרה למיין						10s		20	10s	1
SVT-10	Shivta	Tepper, Bar-Oz and Gini	Daniel Fuks	2016-2018	E	503	5016	Yes	3		47	דגניים להגדרה						7		7	7	1
SVT-13	Shivta	Tepper, Bar-Oz and Gini				503	5039				58	עוקצר מצוי	Brachypodium distachyon					5		5	5	<2
SVT-10	Shivta	Tepper, Bar-Oz and Gini	Daniel Fuks	2016-2018	E	503	5016	Yes	3		49	שברי מלען וגלומה						16		16	16	1
SVT-10	Shivta	Tepper, Bar-Oz and Gini	Daniel Fuks	2016-2018	E	503	5016	Yes	3		50	שונות - לא מפוחם						10+		10	10+	1
SVT-10	Shivta	Tepper, Bar-Oz and Gini	Daniel Fuks	2016-2018	E	503	5016	Yes	3		51	שונות - לא להתעסק						24		24	24	1					23של 2מ"מ
SVT-10	Shivta	Tepper, Bar-Oz and Gini	Daniel Fuks	2016-2018	E	503	5016	Yes	3		52	דגני		מפרק	culm node	דניים	Gramineae	38		38	38	1					16של 2מ"מ
SVT-10	Shivta	Tepper, Bar-Oz and Gini	Daniel Fuks	2016-2018	E	503	5016	Yes	3		53											1					2של 2מ"מ
SVT-4	Shivta	Tepper, Bar-Oz and Gini	Daniel Fuks	2016-2017	E	501	5102	Yes	3	1	21	עוקצר מצוי	Brachypodium distachyon	גרגיר	grain	דגניים	Gramineae	10		10		1mm+
SVT-11	Shivta	Tepper, Bar-Oz and Gini				503	5018				29	גלעינית	Buglossoides					1		1	1
SVT-11	Shivta	Tepper, Bar-Oz and Gini	Daniel Fuks	2016-2018	E	503	5018	Yes	3		3	חיטה/שעורה	Hordeum/Triticum	גרגיר	Hordeum/Triticum	דגניים	Gramineae	7	2	12	12	1+	2
SVT-4	Shivta	Tepper, Bar-Oz and Gini	Daniel Fuks	2016-2017	E	501	5102	Yes	3		105	גלעינית זעירת פרחים	Buglossoides tenuiflora	זרע	seed	זיפניים	Boraginaceae	2		2		1+
SVT-11	Shivta	Tepper, Bar-Oz and Gini	Daniel Fuks	2016-2018	E	503	5018	Yes	3		5			פרק גבעול		דגניים	Gramineae	31		31		1+
SVT-11	Shivta	Tepper, Bar-Oz and Gini	Daniel Fuks	2016-2018	E	503	5018	Yes	3		6			שורשים		דגניים	Gramineae	4		4		1+
SVT-1	Shivta	Tepper, Bar-Oz and Gini	Daniel Fuks	2016-2017	E	500	5003	Yes	3		19	ציפרני החתול	Calendula sp.	זרעון	achene	מורכבים	Asteraceae	1		1		1mm+
SVT-11	Shivta	Tepper, Bar-Oz and Gini	Daniel Fuks	2016-2018	E	503	5018	Yes	3		8	שעורה דו-טורית		חלקי שדרה	Hordeum vulgare distichum	דגניים	Gramineae	3?		3		1+
SVT-11	Shivta	Tepper, Bar-Oz and Gini	Daniel Fuks	2016-2018	E	503	5018	Yes	3		9	חיטת הלחם		חלקי שדרה	Triticum aestivum	דגניים	Gramineae	3		3		1+
SVT-11	Shivta	Tepper, Bar-Oz and Gini	Daniel Fuks	2016-2018	E	503	5018	Yes	3		10											1+
SVT-10	Shivta	Tepper, Bar-Oz and Gini	Daniel Fuks	2016-2018	E	503	5016	Yes	3		40	ציפרני החתול	Calendula sp.					1		1	1	1
SVT-11	Shivta	Tepper, Bar-Oz and Gini	Daniel Fuks	2016-2018	E	503	5018	Yes	3		12	חלמית	Malva	זרע ופרודה	Malva	חלמיתיים	Malvaceae	2		2		1+
SVT-11	Shivta	Tepper, Bar-Oz and Gini				503	5018				37	ציפרני החתול	Calendula sp.		Calendula sp.			2		2	2
SVT-12	Shivta	Tepper, Bar-Oz and Gini				503	5019				33	ציפרני החתול	Calendula sp.		Calendula sp.			2		2	2
SVT-11	Shivta	Tepper, Bar-Oz and Gini	Daniel Fuks	2016-2018	E	503	5018	Yes	3		15	שונות למיון										1+	2
SVT-11	Shivta	Tepper, Bar-Oz and Gini	Daniel Fuks	2016-2018	E	503	5018	Yes	3		16	גלל										1+	2
SVT-13	Shivta	Tepper, Bar-Oz and Gini				503	5039				45	ציפרני החתול	Calendula sp.					9		9	9	<2
SVT-11	Shivta	Tepper, Bar-Oz and Gini	Daniel Fuks	2016-2018	E	503	5018	Yes	3		18	עצמות											2
SVT-140	Shivta	Tepper, Bar-Oz and Gini	Daniel Fuks	2016-2017	E	504	5029	No	3		60	ציפרני החתול	Calendula sp.							4	4			1
SVT-11	Shivta	Tepper, Bar-Oz and Gini				503	5018				20	בלתי		עוקץ	pedicel			4		4	4
SVT-11	Shivta	Tepper, Bar-Oz and Gini				503	5018				21	שעורה		גרגיר	grain			4		4	4
SVT-3	Shivta	Tepper, Bar-Oz and Gini	Daniel Fuks	2016-2017	E	501	5097	Yes	3		58	ציפרני החתול	Calendula sp.									1mm+
SVT-4	Shivta	Tepper, Bar-Oz and Gini	Daniel Fuks	2016-2017	E	501	5102	Yes	3		81	ציפרני החתול	Calendula sp.	זרעון	achene	מורכבים	Asteraceae	2		2		1+
SVT-13	Shivta	Tepper, Bar-Oz and Gini				503	5039				106	קרדריה	Cardaria draba	זרע בהלקט			מצליבים	1		1	1	<2
SVT-5	Shivta	Tepper, Bar-Oz and Gini	Daniel Fuks	2016-2017	E	501	5110	Yes	3		35	כפיות שעירות	Carrichtera annua									1+
SVT-11	Shivta	Tepper, Bar-Oz and Gini				503	5018				26	זון	Lolium sp.		Lolium			2		2	2
SVT-4	Shivta	Tepper, Bar-Oz and Gini	Daniel Fuks	2016-2017	E	501	5102	Yes	3		179	ששן מאפיר	Caylusea hexagyna	זרע	seed	רכפתיים	Resedaceae	2		2		0.5
SVT-11	Shivta	Tepper, Bar-Oz and Gini				503	5018				28	זיפני						1		1	1
SVT-13	Shivta	Tepper, Bar-Oz and Gini				503	5039				75	שבט הדרדרים	Centauren					2		2	2	<2
SVT-5	Shivta	Tepper, Bar-Oz and Gini	Daniel Fuks	2016-2017	E	501	5110	Yes	3		24	כף-אווז	Chenopodium									1+
SVT-11	Shivta	Tepper, Bar-Oz and Gini				503	5018				31	ציפרנית?			Silene?			1		1	1
SVT-11	Shivta	Tepper, Bar-Oz and Gini				503	5018				32				Adonis?			1		1	1
SVT-11	Shivta	Tepper, Bar-Oz and Gini				503	5018				33	ארכוביתי?						2		2	2
SVT-11	Shivta	Tepper, Bar-Oz and Gini				503	5018				34	חומעה/ארכובת			Rumex/Polygonum			2		2	2
SVT-4	Shivta	Tepper, Bar-Oz and Gini	Daniel Fuks	2016-2017	E	501	5102	Yes	3	1	149	קוטנדיה מצרית/מדוקרנת	Cutandia memphitica/dichotoma	גרגיר	grain	דגניים	Gramineae	1		1		0.5
SVT-11	Shivta	Tepper, Bar-Oz and Gini				503	5018				36	זרעון מורכבים		זרעון	achene	מורכבים	Asteraceae	3		3	3
SVT-15	Shivta	Tepper, Bar-Oz and Gini	Daniel Fuks	2016-2017	E	505	5031	Yes	3		14	שבט הדרדרים	Cynareae	קרקפת פורה	head	מורכבים	Asteraceae	1		1		1+
SVT-11	Shivta	Tepper, Bar-Oz and Gini				503	5018				38	דגני						2		2	2
SVT-11	Shivta	Tepper, Bar-Oz and Gini				503	5018				39	שפתני?						1		1	1
SVT-13	Shivta	Tepper, Bar-Oz and Gini				503	5039				60	יבלית מצויה	Cynodon dactylon					141		141	141	<2
SVT-11	Shivta	Tepper, Bar-Oz and Gini				503	5018				41	אחיאירוס/צהרון?						1		1	1
SVT-11	Shivta	Tepper, Bar-Oz and Gini				503	5018				42	שבר לבן?						3		3	3
SVT-11	Shivta	Tepper, Bar-Oz and Gini				503	5018				43	ליואל						10		10	10
SVT-11	Shivta	Tepper, Bar-Oz and Gini				503	5018				44	פרק סלקי		פרקי גבעול	Tribe: Salsoleae			4		4	4
SVT-11	Shivta	Tepper, Bar-Oz and Gini				503	5018				45	חלמית	Malva		Malva			32		32	32
SVT-11	Shivta	Tepper, Bar-Oz and Gini				503	5018				46	דגני		מפרק	culm node	דניים	Gramineae	30		30	30
SVT-4	Shivta	Tepper, Bar-Oz and Gini	Daniel Fuks	2016-2017	E	501	5102	Yes	3	1	47	יבלית מצויה	Cynodon dactylon	גרגיר עטוי	grain and glume	דגניים	Gramineae	3		3		1mm+
SVT-11	Shivta	Tepper, Bar-Oz and Gini				503	5018				48	אספסת?						5		5	5
SVT-11	Shivta	Tepper, Bar-Oz and Gini				503	5018				49	קדד/גרגרנית			Astragalus/Trigonella			1		1	1
SVT-11	Shivta	Tepper, Bar-Oz and Gini				503	5018				50	קדד/גרגרנית			Astragalus/Trigonella			2		2	2
SVT-11	Shivta	Tepper, Bar-Oz and Gini				503	5018				51	פרפרני קטן						2		2	2
SVT-11	Shivta	Tepper, Bar-Oz and Gini				503	5018				52	גרגרנית ערבית?						14		14	14
SVT-11	Shivta	Tepper, Bar-Oz and Gini				503	5018				53	חרק						1		1	1
SVT-11	Shivta	Tepper, Bar-Oz and Gini				503	5018				54	גלל - שמר						1		1	1
SVT-11	Shivta	Tepper, Bar-Oz and Gini				503	5018				55	בלתי שונות
SVT-11	Shivta	Tepper, Bar-Oz and Gini				503	5018				56	מלוח			Atriplex			6		6	6
SVT-11	Shivta	Tepper, Bar-Oz and Gini				503	5018				57	שונות - לא מפוחם
SVT-11	Shivta	Tepper, Bar-Oz and Gini				503	5018				58	חלקי שדרה פרק ראשון						9		9	9
SVT-11	Shivta	Tepper, Bar-Oz and Gini				503	5018				59	שברי מלען וגלומה
SVT-11	Shivta	Tepper, Bar-Oz and Gini				503	5018				60	חלקי שדרה						10s		20	10s
SVT-4	Shivta	Tepper, Bar-Oz and Gini	Daniel Fuks	2016-2017	E	501	5102	Yes	3	1	153	יבלית מצויה	Cynodon dactylon	גרגיר	grain	דגניים	Gramineae	56		56		0.5
SVT-4	Shivta	Tepper, Bar-Oz and Gini	Daniel Fuks	2016-2017	E	501	5102	Yes	3	1	154	יבלית מצויה	Cynodon dactylon	פרח פורה	fertile floret	דגניים	Gramineae	8		8		0.5
SVT-12	Shivta	Tepper, Bar-Oz and Gini	Daniel Fuks	2016-2018	E	503	5019	Yes	3		3	חיטה/שעורה	Hordeum/Triticum	גרגיר	Hordeum/Triticum	דגניים	Gramineae	1	6	7	7	2	2
SVT-4	Shivta	Tepper, Bar-Oz and Gini	Daniel Fuks	2016-2017	E	501	5102	Yes	3	1	155	יבלית מצויה	Cynodon dactylon	פרח עקר	unfertile floret	דגניים	Gramineae	6		6		0.5
SVT-12	Shivta	Tepper, Bar-Oz and Gini	Daniel Fuks	2016-2018	E	503	5019	Yes	3		5			פרק גבעול		דגניים	Gramineae	23		23		1+
SVT-12	Shivta	Tepper, Bar-Oz and Gini	Daniel Fuks	2016-2018	E	503	5019	Yes	3		6			שורשים		דגניים	Gramineae	5		5		1+
SVT-12	Shivta	Tepper, Bar-Oz and Gini	Daniel Fuks	2016-2018	E	503	5019	Yes	3		7	פרק גבעול להגדרה		פרק גבעול		דגניים	Gramineae	1		1		1+
SVT-6	Shivta	Tepper, Bar-Oz and Gini	Daniel Fuks	2016-2017	E	501	5111	Yes	3		12	יבלית מצויה	Cynodon dactylon	גרגיר	grain	דגניים	Gramineae	1		1		1+
SVT-12	Shivta	Tepper, Bar-Oz and Gini	Daniel Fuks	2016-2018	E	503	5019	Yes	3		9	שעורה		חלקי שדרה	Hordeum	דגניים	Gramineae	3		3		1+
SVT-12	Shivta	Tepper, Bar-Oz and Gini	Daniel Fuks	2016-2018	E	503	5019	Yes	3		10	חיטת הלחם		חלקי שדרה	Triticum aestivum	דגניים	Gramineae	1		1		1+
SVT-12	Shivta	Tepper, Bar-Oz and Gini	Daniel Fuks	2016-2018	E	503	5019	Yes	3		11			שברי גלומה ומלען		דגניים	Gramineae					1+
SVT-4	Shivta	Tepper, Bar-Oz and Gini	Daniel Fuks	2016-2017	E	501	5102	Yes	3		106	עכנאי שרוע	Echium angustifolium	זרע	seed	זיפניים	Boraginaceae	1		1		1+
SVT-12	Shivta	Tepper, Bar-Oz and Gini	Daniel Fuks	2016-2018	E	503	5019	Yes	3		13	גרגרנית/קדד		זרע	Astragalus/Trigonella	פרפרניים	Fabaceae	1		1		1+
SVT-12	Shivta	Tepper, Bar-Oz and Gini	Daniel Fuks	2016-2018	E	503	5019	Yes	3		14	בלתי ליואל						1		1		1+
SVT-12	Shivta	Tepper, Bar-Oz and Gini	Daniel Fuks	2016-2018	E	503	5019	Yes	3		15	חלמית	Malva	זרע ופרודה	Malva	חלמיתיים	Malvaceae	2		2		1+
SVT-12	Shivta	Tepper, Bar-Oz and Gini	Daniel Fuks	2016-2018	E	503	5019	Yes	3		16	תלתן?										1+
SVT-1	Shivta	Tepper, Bar-Oz and Gini	Daniel Fuks	2016-2017	E	500	5003	Yes	3		54	אמיך קוצני	Emex spinosa	פרי	fruit		Polygonaceae	1		1		1mm+
SVT-12	Shivta	Tepper, Bar-Oz and Gini	Daniel Fuks	2016-2018	E	503	5019	Yes	3		18	שונות למיון										1+	2
SVT-11	Shivta	Tepper, Bar-Oz and Gini	Daniel Fuks	2016-2018	E	503	5018	Yes	3		13	אמיך קוצני	Emex spinosa	פרי	Emex spinosa	ארכוביתיים	Polygonaceae	1		1		1+	2
SVT-12	Shivta	Tepper, Bar-Oz and Gini				503	5019				20	שעורה		גרגיר	Hordeum Sp.			1		1	1
SVT-12	Shivta	Tepper, Bar-Oz and Gini				503	5019				21	גפן??	Vitis vinifera??	עוקץ	Vitis vinifera??			1		1	1
SVT-12	Shivta	Tepper, Bar-Oz and Gini				503	5019				22	גפן??	Vitis vinifera??	?זג	grape skin?			1		1	1
SVT-12	Shivta	Tepper, Bar-Oz and Gini				503	5019				23	שעורה ממיני הבר			Hordeum			1		1	1
SVT-12	Shivta	Tepper, Bar-Oz and Gini				503	5019				24	דגני - שונות						8		8	8
SVT-12	Shivta	Tepper, Bar-Oz and Gini				503	5019				25	חכורית						1		1	1
SVT-12	Shivta	Tepper, Bar-Oz and Gini				503	5019				26	קוטנדיה? להגדרה						1		1	1
SVT-12	Shivta	Tepper, Bar-Oz and Gini				503	5019				27	אספסת	Medicago		Medicago			6		6	6
SVT-12	Shivta	Tepper, Bar-Oz and Gini				503	5019				28	cf. פרפרני קטן						1		1	1
SVT-12	Shivta	Tepper, Bar-Oz and Gini				503	5019				37	אמיך קוצני	Emex spinosa	קליפת פרי				2		2	2
SVT-13	Shivta	Tepper, Bar-Oz and Gini	Daniel Fuks	2016-2018	E	503	5039	Yes	3		18	אמיך קוצני	Emex spinosa	פרי		ארכוביתיים	Polygonaceae	1		1		2					2של 1מ"מ
SVT-13	Shivta	Tepper, Bar-Oz and Gini				503	5039				79	אמיך קוצני	Emex spinosa					1		1	1	<2
SVT-14	Shivta	Tepper, Bar-Oz and Gini	Daniel Fuks	2016-2018	E	504	5029	Yes	3		17	אמיך קוצני	Emex spinosa	פרי	fruit	ארכוביתיים	Polygonaceae	3	1	3		1+	2				2של 1מ"מ
SVT-140	Shivta	Tepper, Bar-Oz and Gini	Daniel Fuks	2016-2017	E	504	5029	No	3		61	אמיך קוצני	Emex spinosa			ארכוביתיים				1	1			1
SVT-12	Shivta	Tepper, Bar-Oz and Gini				503	5019				34	זרעון מורכבים		זרעון	achene	מורכבים	Asteraceae	2		2	2						1של 1מ"מ
SVT-12	Shivta	Tepper, Bar-Oz and Gini				503	5019				35	?דבקה						1		1	1
SVT-12	Shivta	Tepper, Bar-Oz and Gini				503	5019				36	ציפרנית?			Silene?			1		1	1
SVT-15	Shivta	Tepper, Bar-Oz and Gini	Daniel Fuks	2016-2017	E	505	5031	Yes	3		13	אמיך קוצני	Emex spinosa	פרי	fruit	ארכוביתיים	Polygonaceae	1		1		1+
SVT-12	Shivta	Tepper, Bar-Oz and Gini				503	5019				38				Adonis?			1		1	1
SVT-16	Shivta	Tepper, Bar-Oz and Gini	Daniel Fuks	2016-2017	E	505	5037	Yes	3		21	אמיך קוצני	Emex spinosa	פרי	fruit	ארכוביתיים	Polygonaceae	1		1		1+
SVT-12	Shivta	Tepper, Bar-Oz and Gini				503	5019				40	אחיאירוס/צהרון?	Moraea?					1		1	1
SVT-12	Shivta	Tepper, Bar-Oz and Gini				503	5019				41	חלמית	Malva	זרע	Malva			9		9	9
SVT-4	Shivta	Tepper, Bar-Oz and Gini	Daniel Fuks	2016-2017	E	501	5102	Yes	3		77	אמיך קוצני	Emex spinosa	פרי	fruit	ארכוביתיים	Polygonaceae	8		8		1+					11של 2מ"מ ועוד 3מ-4-2
SVT-12	Shivta	Tepper, Bar-Oz and Gini				503	5019				43	חלמחת פרוקה לא מפוחם						19		19	19
SVT-4	Shivta	Tepper, Bar-Oz and Gini	Daniel Fuks	2016-2017	E	501	5102	Yes	3		122	אמיך קוצני	Emex spinosa	אגוזית	nutlet	ארכוביתיים	Polygonaceae	5		5		1+
SVT-12	Shivta	Tepper, Bar-Oz and Gini				503	5019				45	בלתי - שונות
SVT-12	Shivta	Tepper, Bar-Oz and Gini				503	5019				46	ליואל
SVT-12	Shivta	Tepper, Bar-Oz and Gini				503	5019				47	דגני						2		2	2
SVT-12	Shivta	Tepper, Bar-Oz and Gini				503	5019				48	דגני		מפרק	culm node	דניים	Gramineae	16		16	16
SVT-12	Shivta	Tepper, Bar-Oz and Gini				503	5019				49	חלקי שדרה
SVT-12	Shivta	Tepper, Bar-Oz and Gini				503	5019				50	שברי מלען וגלומה
SVT-5	Shivta	Tepper, Bar-Oz and Gini	Daniel Fuks	2016-2017	E	501	5110	Yes	3		26	אמיך קוצני	Emex spinosa	פרי	fruit	ארכוביתיים	Polygonaceae	2		2		1+
SVT-6	Shivta	Tepper, Bar-Oz and Gini	Daniel Fuks	2016-2017	E	501	5111	Yes	3		18	אמיך קוצני	Emex spinosa	פרי	fruit	ארכוביתיים	Polygonaceae	2		2		1+
SVT-13	Shivta	Tepper, Bar-Oz and Gini	Daniel Fuks	2016-2018	E	503	5039	Yes	3		3	חיטה/שעורה		גרגיר	Hordeum/Triticum	דגניים	Gramineae	10	7	17	17	2	2
SVT-13	Shivta	Tepper, Bar-Oz and Gini	Daniel Fuks	2016-2018	E	503	5039	Yes	3		4			פרק גבעול		דגניים	Gramineae	59	1	59		2	2
SVT-13	Shivta	Tepper, Bar-Oz and Gini	Daniel Fuks	2016-2018	E	503	5039	Yes	3		5			שורשים		דגניים	Gramineae	14		14		2
SVT-13	Shivta	Tepper, Bar-Oz and Gini	Daniel Fuks	2016-2018	E	503	5039	Yes	3		6	EMPTY										2
SVT-7	Shivta	Tepper, Bar-Oz and Gini	Daniel Fuks	2016-2018	E	501	5118	Yes	3		19	אמיך קוצני	Emex spinosa	פרי	fruit	ארכוביתיים	Polygonaceae	3	2	3		1+	2
SVT-10	Shivta	Tepper, Bar-Oz and Gini	Daniel Fuks	2016-2018	E	503	5016	Yes	3		9	בן-שלח מנוצה	Erucaria microcarpa					1		1		1+
SVT-11	Shivta	Tepper, Bar-Oz and Gini				503	5018				35	בן-שלח מנוצה	Erucaria microcarpa					3		3	3
SVT-13	Shivta	Tepper, Bar-Oz and Gini	Daniel Fuks	2016-2018	E	503	5039	Yes	3		10	חיטה/שעורה	Hordeum/Triticum	חלקי שדרה		דגניים	Gramineae	4		4		2
SVT-13	Shivta	Tepper, Bar-Oz and Gini	Daniel Fuks	2016-2018	E	503	5039	Yes	3		11			שברי גלומה ומלען		דגניים	Gramineae					2
SVT-13	Shivta	Tepper, Bar-Oz and Gini	Daniel Fuks	2016-2018	E	503	5039	Yes	3		12	זון משכר?	Lolium temulentum?	גרגיר		דגניים	Gramineae	1		1		2
SVT-12	Shivta	Tepper, Bar-Oz and Gini				503	5019				39	בן-שלח מנוצה	Erucaria microcarpa		Erucaria microcarpa			1		1	1
SVT-13	Shivta	Tepper, Bar-Oz and Gini	Daniel Fuks	2016-2018	E	503	5039	Yes	3		14			שברי גרגיר		דגניים	Gramineae					2	2
SVT-13	Shivta	Tepper, Bar-Oz and Gini	Daniel Fuks	2016-2018	E	503	5039	Yes	3		15	דגני להגדרה		גרגיר		דגניים	Gramineae	2		2		2
SVT-13	Shivta	Tepper, Bar-Oz and Gini				503	5039				70	בן-שלח מנוצה	Erucaria microcarpa	מקור	siliqua			25		25	25	<2
SVT-13	Shivta	Tepper, Bar-Oz and Gini	Daniel Fuks	2016-2018	E	503	5039	Yes	3		17	קטניות		זרע		פרפרניים	Fabaceae	4	3	4		2	2
SVT-140	Shivta	Tepper, Bar-Oz and Gini	Daniel Fuks	2016-2017	E	504	5029	No	3		65	בן-שלח להגדרה	Erucaria microcarpa	תרמיל						11	11			1
SVT-4	Shivta	Tepper, Bar-Oz and Gini	Daniel Fuks	2016-2017	E	501	5102	Yes	3		88	בן-שלח מנוצה	Erucaria microcarpa	מקור		מצליבים	Brassicaceae	1		1		1+
SVT-4	Shivta	Tepper, Bar-Oz and Gini	Daniel Fuks	2016-2017	E	501	5102	Yes	3		201	בן-שלח מנוצה	Erucaria microcarpa	מקור		מצליבים	Brassicaceae	1		1		0.5
SVT-16	Shivta	Tepper, Bar-Oz and Gini	Daniel Fuks	2016-2017	E	505	5037	Yes	3		24	שלח מאונקל	Erucaria pinnata	תרמיל	pod	מצליבים	Brassicaceae	1		1		1+
SVT-13	Shivta	Tepper, Bar-Oz and Gini				503	5039				87	חלבלוב מגלי	Euphorbia falcata					1		1	1	<2
SVT-13	Shivta	Tepper, Bar-Oz and Gini	Daniel Fuks	2016-2018	E	503	5039	Yes	3		23	להגדרה						3		3		2
SVT-11	Shivta	Tepper, Bar-Oz and Gini				503	5018				22	פיקוס התאנה	Ficus carica					1		1	1
SVT-13	Shivta	Tepper, Bar-Oz and Gini	Daniel Fuks	2016-2018	E	503	5039	Yes	3		25	חפורית?	Phalaris?	גרגיר		דגניים	Gramineae	2		2		2
SVT-13	Shivta	Tepper, Bar-Oz and Gini	Daniel Fuks	2016-2018	E	503	5039	Yes	3		26	בלתי-שונות										2
SVT-13	Shivta	Tepper, Bar-Oz and Gini	Daniel Fuks	2016-2018	E	503	5039	Yes	3		27	שונות למיון										2	2
SVT-13	Shivta	Tepper, Bar-Oz and Gini				503	5039				33	פיקוס התאנה	Ficus carica	אגוזית	nutlet			7		7	7	<2
SVT-13	Shivta	Tepper, Bar-Oz and Gini	Daniel Fuks	2016-2018	E	503	5039	Yes	3		29	גלל		שברים								2	2
SVT-13	Shivta	Tepper, Bar-Oz and Gini				503	5039				30	דגני לחבר/למיין/להגדרה		גרגיר	grain			46		46	46	<2
SVT-4	Shivta	Tepper, Bar-Oz and Gini	Daniel Fuks	2016-2017	E	501	5102	Yes	3		90	עשנן קטן	Fumaria parviflora	פרי	fuit	עשנניים	Fumariaceae	1		1		1+
SVT-4	Shivta	Tepper, Bar-Oz and Gini	Daniel Fuks	2016-2017	E	501	5102	Yes	3		87	עשנן קטן/צפוף	Fumaria parviflora/densiflora	פרי	fuit	עשנניים	Fumariaceae	4		4		1+
SVT-4	Shivta	Tepper, Bar-Oz and Gini	Daniel Fuks	2016-2017	E	501	5102	Yes	3		91	דבקה/חספסנית	Galium/Asperula			פואתיים	Rubiaceae	1		1		1+
SVT-13	Shivta	Tepper, Bar-Oz and Gini				503	5039				34	גרגרנית הכוכב??						5		5	5	<2
SVT-13	Shivta	Tepper, Bar-Oz and Gini				503	5039				35	גרגרנית ערבית?						4		4	4	<2
SVT-13	Shivta	Tepper, Bar-Oz and Gini				503	5039				36	קדד/גרגרנית			Astragalus/Trigonella			14		14	14	<2
SVT-13	Shivta	Tepper, Bar-Oz and Gini				503	5039				37	אספסת			Medicago			15		15	15	<2
SVT-13	Shivta	Tepper, Bar-Oz and Gini				503	5039				38	מצליבים קטנית/פרפרנים										<2
SVT-13	Shivta	Tepper, Bar-Oz and Gini				503	5039				39	רכפה - להגדרה						30		30	30	<2
SVT-13	Shivta	Tepper, Bar-Oz and Gini				503	5039				40	זרעון מורכבים		זרעון	achene	מורכבים	Asteraceae	111		111	111	<2
SVT-13	Shivta	Tepper, Bar-Oz and Gini				503	5039				41	פרק סלקי		פרקי גבעול	Tribe: Salsoleae			6		6	6	<2
SVT-11	Shivta	Tepper, Bar-Oz and Gini				503	5018				47	עוקץ העקרב	Heliotropium					2		2	2
SVT-13	Shivta	Tepper, Bar-Oz and Gini				503	5039				43	שפתני?						11		11	11	<2
SVT-13	Shivta	Tepper, Bar-Oz and Gini				503	5039				44	שבר לבן?						7		7	7	<2
SVT-13	Shivta	Tepper, Bar-Oz and Gini	Daniel Fuks	2016-2018	E	503	5039	Yes	3		7	שעורה	Hordeum	חלקי שדרה		דגניים	Gramineae	1		1		2
SVT-13	Shivta	Tepper, Bar-Oz and Gini				503	5039				46	מצעת מורכבים						1		1	1	<2
SVT-13	Shivta	Tepper, Bar-Oz and Gini				503	5039				47	פרח סוככי להגדרה בהמשך			Apiaceae			1		1	1	<2
SVT-26	Shivta	Tepper, Bar-Oz and Gini	Daniel Fuks	2016-2017	E	515	5103	Yes	3		6	שעורה	Hordeum	חלקי שדרה	rachis segment	דגניים	Gramineae	2		2		1+
SVT-3	Shivta	Tepper, Bar-Oz and Gini	Daniel Fuks	2016-2017	E	501	5097	Yes	3	1	4	שעורה	Hordeum	גרגיר	grain	דגניים	Gramineae	5		5	5	1				יואל: לא ברור לי מה קורה פה
SVT-13	Shivta	Tepper, Bar-Oz and Gini				503	5039				50	שעורה קטנה להגדרה						4		4	4	<2
SVT-13	Shivta	Tepper, Bar-Oz and Gini				503	5039				51	זון		גלומה	Lolium			3		3	3	<2
SVT-13	Shivta	Tepper, Bar-Oz and Gini				503	5039				52	זון?			Lolium?			10		10	10	<2
SVT-13	Shivta	Tepper, Bar-Oz and Gini				503	5039				53	?שעורה/זון						10		10	10	<2
SVT-13	Shivta	Tepper, Bar-Oz and Gini				503	5039				54	דגני		מפרק	culm node	דניים	Gramineae	15		15	15	<2
SVT-13	Shivta	Tepper, Bar-Oz and Gini				503	5039				55	דגני		מפרק	roots	דניים	Gramineae	3		3	3	<2
SVT-13	Shivta	Tepper, Bar-Oz and Gini				503	5039				56	דגן? - שברים						27		27	27	<2
SVT-13	Shivta	Tepper, Bar-Oz and Gini				503	5039				57	קוטנדיה?	Cutandia?					4		4	4	<2
SVT-7	Shivta	Tepper, Bar-Oz and Gini	Daniel Fuks	2016-2018	E	501	5118	Yes	3		28	שעורה דו-טורית	Hordeum distichum	חלקי שדרה	rachis segment	דגניים	Gramineae		1				2
SVT-4	Shivta	Tepper, Bar-Oz and Gini	Daniel Fuks	2016-2017	E	501	5102	Yes	3	1	17	שעורת העכבר	Hordeum glaucum	גרגיר	grain	דגניים	Gramineae	1		1		1mm+
SVT-4	Shivta	Tepper, Bar-Oz and Gini	Daniel Fuks	2016-2017	E	501	5102	Yes	3	1	20	שעורת העכבר/החוף	Hordeum glaucum/marinum	גרגיר	grain	דגניים	Gramineae	1		1		1mm+
SVT-4	Shivta	Tepper, Bar-Oz and Gini	Daniel Fuks	2016-2017	E	501	5102	Yes	3	1	157	שעורת החוף/נימית	Hordeum marinum/hystrix	גרגיר	grain	דגניים	Gramineae	2		2		0.5
SVT-13	Shivta	Tepper, Bar-Oz and Gini				503	5039				62	מלעניאל/ברמית	Bromus type					1		1	1	<2
SVT-13	Shivta	Tepper, Bar-Oz and Gini				503	5039				63	זון משכר cf.	Lolium temulentum?					2		2	2	<2
SVT-13	Shivta	Tepper, Bar-Oz and Gini				503	5039				64	דגני		מפרק	culm node	דניים	Gramineae	71		71	71	<2
SVT-13	Shivta	Tepper, Bar-Oz and Gini				503	5039				65	חלקי מלען וגלומה										<2
SVT-13	Shivta	Tepper, Bar-Oz and Gini				503	5039				66	דגן		חלקי שדרה	rachis			10s		20	10s	<2
SVT-13	Shivta	Tepper, Bar-Oz and Gini				503	5039				67	חלמית	Malva					43		43	43	<2
SVT-13	Shivta	Tepper, Bar-Oz and Gini				503	5039				68	לחך						23		23	23	<2
SVT-13	Shivta	Tepper, Bar-Oz and Gini				503	5039				69	חלמית	Malva		calyx							<2
SVT-10	Shivta	Tepper, Bar-Oz and Gini	Daniel Fuks	2016-2018	E	503	5016	Yes	3		5	שעורה	Hordeum sp.	חלקי שדרה	rachis segment	דגניים	Gramineae	3		3		1+
SVT-13	Shivta	Tepper, Bar-Oz and Gini				503	5039				71	ארכוביתי						4		4	4	<2
SVT-13	Shivta	Tepper, Bar-Oz and Gini				503	5039				72	כף - אווז						23		23	23	<2
SVT-13	Shivta	Tepper, Bar-Oz and Gini				503	5039				73	אחיאירוס/צהרון?	Moraea?					3		3	3	<2
SVT-10	Shivta	Tepper, Bar-Oz and Gini	Daniel Fuks	2016-2018	E	503	5016	Yes	3		20	שעורה	Hordeum sp.	גרגיר	grain			1		1	1	1
SVT-13	Shivta	Tepper, Bar-Oz and Gini				503	5039				31	שעורה	Hordeum Sp.	גרגיר	grain			3		3	3	<2
SVT-140	Shivta	Tepper, Bar-Oz and Gini	Daniel Fuks	2016-2017	E	504	5029	No	3		27	שעורה	Hordeum sp.	פרק ציר שיבולת	rachis fragments	דגניים	Gramineae			28	28			1
SVT-13	Shivta	Tepper, Bar-Oz and Gini				503	5039				77	מכננן שעיר אגוזית						3		3	3	<2
SVT-2	Shivta	Tepper, Bar-Oz and Gini	Daniel Fuks	2016-2017	E	501	5006	Yes	3	1	14	שעורה	Hordeum sp.	חלקי שדרה	rachis fragments	דגניים	Gramineae	2		2		1mm+
SVT-4	Shivta	Tepper, Bar-Oz and Gini	Daniel Fuks	2016-2017	E	501	5102	Yes	3	1	28	שעורה	Hordeum sp.	פרק ציר שיבולת	rachis fragments	דגניים	Gramineae	6		6		1mm+
SVT-13	Shivta	Tepper, Bar-Oz and Gini				503	5039				80	כף - אווז? Cf.						24		24	24	<2
SVT-1	Shivta	Tepper, Bar-Oz and Gini	Daniel Fuks	2016-2017	E	500	5003	Yes	3	1	1	שעורה תרבותית	Hordeum vulgare	גרגיר	grain	דגניים	Gramineae	22	2	24	24	2	2
SVT-13	Shivta	Tepper, Bar-Oz and Gini				503	5039				82	מורכבים - מררית?						1		1	1	<2
SVT-13	Shivta	Tepper, Bar-Oz and Gini				503	5039				83		Vaccaria?					1		1	1	<2
SVT-10	Shivta	Tepper, Bar-Oz and Gini	Daniel Fuks	2016-2018	E	503	5016	Yes	3		1	שעורה תרבותית	Hordeum vulgare	גרגיר	grain	דגניים	Gramineae	19		19	19	2
SVT-11	Shivta	Tepper, Bar-Oz and Gini	Daniel Fuks	2016-2018	E	503	5018	Yes	3		1	שעורה תרבותית	Hordeum vulgare	גרגיר	grain	דגניים	Gramineae	31	6	37	37	2	2
SVT-13	Shivta	Tepper, Bar-Oz and Gini				503	5039				86	פרח מתננ?						3		3	3	<2
SVT-12	Shivta	Tepper, Bar-Oz and Gini	Daniel Fuks	2016-2018	E	503	5019	Yes	3		1	שעורה תרבותית	Hordeum vulgare	גרגיר	grain	דגניים	Gramineae	18	4	22	22	1+	2
SVT-13	Shivta	Tepper, Bar-Oz and Gini				503	5039				88	שונות למיון בהמשך						67		67	67	<2							יואל בשנית: לא להתעסק בינתיים
SVT-13	Shivta	Tepper, Bar-Oz and Gini	Daniel Fuks	2016-2018	E	503	5039	Yes	3		1	שעורה תרבותית	Hordeum vulgare	גרגיר	grain	דגניים	Gramineae	60	7	67	67	2	2
SVT-13	Shivta	Tepper, Bar-Oz and Gini				503	5039				90	שונות - לא מפוחמים										<2
SVT-13	Shivta	Tepper, Bar-Oz and Gini				503	5039				91	גלל - שברים										<2
SVT-13	Shivta	Tepper, Bar-Oz and Gini				503	5039				92	חוליית דג						1		1	1	<2
SVT-13	Shivta	Tepper, Bar-Oz and Gini				503	5039				93	בלתי - לעבור בהמשך										<2
SVT-13	Shivta	Tepper, Bar-Oz and Gini				503	5039				94	מרגנית						10		10	10	<2
SVT-13	Shivta	Tepper, Bar-Oz and Gini				503	5039				95	חיעד ספרדי						25		25	25	<2
SVT-13	Shivta	Tepper, Bar-Oz and Gini				503	5039				96	חרק										<2
SVT-13	Shivta	Tepper, Bar-Oz and Gini				503	5039				97	ציפורניים ציפורנית???		זרע	seed			1		1	1	<2				ניסיתי אך האפשרויות רבות ואין סימני זיהוי ברורים
SVT-13	Shivta	Tepper, Bar-Oz and Gini				503	5039				98	מקור חסירה		זרע	seed			1		1	1	<2
SVT-13	Shivta	Tepper, Bar-Oz and Gini				503	5039				99	ציפרני החתול?		זרע	seed			1		1	1	<2
SVT-13	Shivta	Tepper, Bar-Oz and Gini				503	5039				100	סוככי		זרע	seed			3		3	3	<2
SVT-13	Shivta	Tepper, Bar-Oz and Gini				503	5039				101	ליואל-ארכוביתי		זרע	seed			4		4	4	<2
SVT-13	Shivta	Tepper, Bar-Oz and Gini				503	5039				102	ארכוביתים?		זרע	seed			8		8	8	<2
SVT-13	Shivta	Tepper, Bar-Oz and Gini				503	5039				103	סוככים		זרע	seed			1		1	1	<2
SVT-13	Shivta	Tepper, Bar-Oz and Gini				503	5039				104	גזיר דקיק?	Torilis tenella?	זרע	seed			1		1	1	<2
SVT-14	Shivta	Tepper, Bar-Oz and Gini	Daniel Fuks	2016-2018	E	504	5029	Yes	3		1	שעורה תרבותית	Hordeum vulgare	גרגיר	grain	דגניים	Gramineae	59	14	73	73	1+	2
SVT-140	Shivta	Tepper, Bar-Oz and Gini	Daniel Fuks	2016-2017	E	504	5029	No	3		1	שעורה תרבותית	Hordeum vulgare	גרגיר	grain	דגניים	Gramineae			51	51			2
SVT-15	Shivta	Tepper, Bar-Oz and Gini	Daniel Fuks	2016-2017	E	505	5031	Yes	3	1	1	שעורה תרבותית	Hordeum vulgare	גרגיר	grain	דגניים	Gramineae	10		10	10	2
SVT-16	Shivta	Tepper, Bar-Oz and Gini	Daniel Fuks	2016-2017	E	505	5037	Yes	3		1	שעורה תרבותית	Hordeum vulgare	גרגיר	grain	דגניים	Gramineae	51	2	53	53	2	2
SVT-14	Shivta	Tepper, Bar-Oz and Gini	Daniel Fuks	2016-2018	E	504	5029	Yes	3		3	חיטה/שעורה	Hordeum/Triticum	גרגיר	grain	דגניים	Gramineae	19	6	25	25	2	2
SVT-14	Shivta	Tepper, Bar-Oz and Gini	Daniel Fuks	2016-2018	E	504	5029	Yes	3		4			פרק גבעול	culm node	דגניים	Gramineae	76		76		1+
SVT-14	Shivta	Tepper, Bar-Oz and Gini	Daniel Fuks	2016-2018	E	504	5029	Yes	3		5			שורשים	roots	דגניים	Gramineae	20		20		1+
SVT-19	Shivta	Tepper, Bar-Oz and Gini	Daniel Fuks	2016-2017	E	507	5045	Yes	1.5		1	שעורה תרבותית	Hordeum vulgare	גרגיר	grain	דגניים	Gramineae	4		4	4	2
SVT-2	Shivta	Tepper, Bar-Oz and Gini	Daniel Fuks	2016-2017	E	501	5006	Yes	3	1	1	שעורה תרבותית	Hordeum vulgare	גרגיר	grain	דגניים	Gramineae	10	2	12	12	2
SVT-22	Shivta	Tepper, Bar-Oz and Gini	Daniel Fuks	2016-2017	E	511	5084	Yes	3		1	שעורה תרבותית	Hordeum vulgare	גרגיר	grain	דגניים	Gramineae	1		1	1	2
SVT-14	Shivta	Tepper, Bar-Oz and Gini	Daniel Fuks	2016-2018	E	504	5029	Yes	3		9			שברי גלומה ומלען	glume and awn fragments	דגניים	Gramineae					1+
SVT-14	Shivta	Tepper, Bar-Oz and Gini	Daniel Fuks	2016-2018	E	504	5029	Yes	3		10	שיבולת שואל ?	Avena?	גרגיר	grain	דגניים	Gramineae	1		1		1+
SVT-14	Shivta	Tepper, Bar-Oz and Gini	Daniel Fuks	2016-2018	E	504	5029	Yes	3		11			שברי גרגיר	grain fragments	דגניים	Gramineae					1+	2
SVT-14	Shivta	Tepper, Bar-Oz and Gini	Daniel Fuks	2016-2018	E	504	5029	Yes	3		12	דגני להגדרה		גרגיר	grain	דגניים	Gramineae	1		1		1+
SVT-14	Shivta	Tepper, Bar-Oz and Gini	Daniel Fuks	2016-2018	E	504	5029	Yes	3		13	דגני להגדרה		גרגיר	grain	דגניים	Gramineae	1		1		1+
SVT-22	Shivta	Tepper, Bar-Oz and Gini	Daniel Fuks	2016-2017	E	511	5084	Yes	3		4	שעורה	Hordeum vulgare	חלקי שדרה	rachis segment	דגניים	Gramineae	1		1		1+
SVT-14	Shivta	Tepper, Bar-Oz and Gini	Daniel Fuks	2016-2018	E	504	5029	Yes	3		15	בקיי		זרע	seed	פרפרניים	Fabaceae	1	2	3	3	1+
SVT-14	Shivta	Tepper, Bar-Oz and Gini	Daniel Fuks	2016-2018	E	504	5029	Yes	3		16	דבקה										1+
SVT-26	Shivta	Tepper, Bar-Oz and Gini	Daniel Fuks	2016-2017	E	515	5103	Yes	3		1	שעורה תרבותית	Hordeum vulgare	גרגיר	grain	דגניים	Gramineae	4		4	4	2
SVT-3	Shivta	Tepper, Bar-Oz and Gini	Daniel Fuks	2016-2017	E	501	5097	Yes	3	1	1	שעורה תרבותית	Hordeum vulgare	גרגיר	grain	דגניים	Gramineae	22	3	25	25	1mm+	2
SVT-3	Shivta	Tepper, Bar-Oz and Gini	Daniel Fuks	2016-2017	E	501	5097	Yes	3	1	32	שעורה	Hordeum vulgare	חלקי שדרה	rachis fragments	דגניים	Gramineae	1		1		1mm+
SVT-4	Shivta	Tepper, Bar-Oz and Gini	Daniel Fuks	2016-2017	E	501	5102	Yes	3	1	1	שעורה תרבותית	Hordeum vulgare	גרגיר	grain	דגניים	Gramineae	55	1	56	56	1mm+	2
SVT-5	Shivta	Tepper, Bar-Oz and Gini	Daniel Fuks	2016-2017	E	501	5110	Yes	3		1	שעורה תרבותית	Hordeum vulgare	גרגיר	grain	דגניים	Gramineae	59	11	70	70	1+	2
SVT-6	Shivta	Tepper, Bar-Oz and Gini	Daniel Fuks	2016-2017	E	501	5111	Yes	3		1	שעורה תרבותית	Hordeum vulgare	גרגיר	grain	דגניים	Gramineae	50	4	54	54	1+	2
SVT-14	Shivta	Tepper, Bar-Oz and Gini	Daniel Fuks	2016-2018	E	504	5029	Yes	3		23	בלתי						2		2		1+
SVT-14	Shivta	Tepper, Bar-Oz and Gini	Daniel Fuks	2016-2018	E	504	5029	Yes	3		24	בלתי-שונות										1+	2
SVT-14	Shivta	Tepper, Bar-Oz and Gini	Daniel Fuks	2016-2018	E	504	5029	Yes	3		25	בלתי-שונות										1+
SVT-14	Shivta	Tepper, Bar-Oz and Gini	Daniel Fuks	2016-2018	E	504	5029	Yes	3		26	שונות למיון										1+
SVT-14	Shivta	Tepper, Bar-Oz and Gini	Daniel Fuks	2016-2018	E	504	5029	Yes	3		27	בלתי ליואל
SVT-7	Shivta	Tepper, Bar-Oz and Gini	Daniel Fuks	2016-2018	E	501	5118	Yes	3		1	שעורה תרבותית	Hordeum vulgare	גרגיר	grain	דגניים	Gramineae	28	5	33	33	2	2
SVT-14	Shivta	Tepper, Bar-Oz and Gini	Daniel Fuks	2016-2018	E	504	5029	Yes	3		29	גלל											2
SVT-9	Shivta	Tepper, Bar-Oz and Gini	Daniel Fuks	2016-2018	E	502	5014	Yes	3		1	שעורה תרבותית	Hordeum vulgare	גרגיר	grain	דגניים	Gramineae	1		1	1	2
SVT-140	Shivta	Tepper, Bar-Oz and Gini	Daniel Fuks	2016-2017	E	504	5029	No	3		7	שעורה דו-טורית	Hordeum vulgare distichum	פרק ציר שיבולת	rachis fragments	דגניים	Gramineae			1	1			2
SVT-140	Shivta	Tepper, Bar-Oz and Gini	Daniel Fuks	2016-2017	E	504	5029	No	3		3	חיטה/שעורה	Hordeum/Triticum	גרגיר	grain	דגניים	Gramineae			35	35			2
SVT-16	Shivta	Tepper, Bar-Oz and Gini	Daniel Fuks	2016-2017	E	505	5037	Yes	3		8	שעורה דו-טורית	Hordeum vulgare distichum	חלקי שדרה	rachis segment	דגניים	Gramineae	2		2		1+
SVT-140	Shivta	Tepper, Bar-Oz and Gini	Daniel Fuks	2016-2017	E	504	5029	No	3		25	שעורה דו-טורית/תבור	Hordeum vulgare distichum/spontaneum	פרק ציר שיבולת	rachis fragments	דגניים	Gramineae			21	21			1
SVT-3	Shivta	Tepper, Bar-Oz and Gini	Daniel Fuks	2016-2017	E	501	5097	Yes	3	1	17	שעורה דו-טורית	Hordeum vulgare disticum	חלקי שדרה	rachis fragments	דגניים	Gramineae	5		5		1mm+
SVT-11	Shivta	Tepper, Bar-Oz and Gini	Daniel Fuks	2016-2018	E	503	5018	Yes	3		7	שעורה שש-טורית	Hordeum vulgare hexastichum	חלקי שדרה	Hordeum vulgare hexastichum	דגניים	Gramineae	1		1		1+
SVT-12	Shivta	Tepper, Bar-Oz and Gini	Daniel Fuks	2016-2018	E	503	5019	Yes	3		8	שעורה שש-טורית	Hordeum vulgare hexastichum	חלקי שדרה	Hordeum vulgare hexastichum	דגניים	Gramineae	1		1		1+
SVT-14	Shivta	Tepper, Bar-Oz and Gini	Daniel Fuks	2016-2018	E	504	5029	Yes	3		6	שעורה שש-טורית	Hordeum vulgare hexastichum	חלקי שדרה	rachis segment	דגניים	Gramineae	9		9		1+
SVT-140	Shivta	Tepper, Bar-Oz and Gini	Daniel Fuks	2016-2017	E	504	5029	No	3		10	חיטה/שעורה	Hordeum/Triticum	פרק ציר שיבולת	rachis fragments	דגניים	Gramineae			1	1			2
SVT-140	Shivta	Tepper, Bar-Oz and Gini	Daniel Fuks	2016-2017	E	504	5029	No	3		11			פרקי גבעול	culm nodes	דגניים	Gramineae			79	79			2
SVT-140	Shivta	Tepper, Bar-Oz and Gini	Daniel Fuks	2016-2017	E	504	5029	No	3		12			שורשים	roots	דגניים	Gramineae			17	17			2		עמ' 40 מחברת 2
SVT-140	Shivta	Tepper, Bar-Oz and Gini	Daniel Fuks	2016-2017	E	504	5029	No	3		13			שברי גרגיר	grain fragments	דגניים	Gramineae							2		עמ' 40 מחברת 2
SVT-140	Shivta	Tepper, Bar-Oz and Gini	Daniel Fuks	2016-2017	E	504	5029	No	3		6	שעורה שש-טורית	Hordeum vulgare hexastichum	פרק ציר שיבולת	rachis fragments	דגניים	Gramineae			6	6			2
SVT-140	Shivta	Tepper, Bar-Oz and Gini	Daniel Fuks	2016-2017	E	504	5029	No	3		23	שעורה שש-טורית	Hordeum vulgare hexastichum	פרק ציר שיבולת	rachis fragments	דגניים	Gramineae			25	25			1
SVT-16	Shivta	Tepper, Bar-Oz and Gini	Daniel Fuks	2016-2017	E	505	5037	Yes	3		7	שעורה שש-טורית	Hordeum vulgare hexastichum	חלקי שדרה	rachis segment	דגניים	Gramineae	3		3		1+
SVT-140	Shivta	Tepper, Bar-Oz and Gini	Daniel Fuks	2016-2017	E	504	5029	No	3		17	קחוון?	Anthemis?	קרקפת פורה	head	מורכבים	Asteraceae			2	2			2
SVT-140	Shivta	Tepper, Bar-Oz and Gini	Daniel Fuks	2016-2017	E	504	5029	No	3		18	בלתי-שונות												2		אולי מתחבר לגרגרנית הערבית, אך אין מספיק עם מה לעבוד
SVT-3	Shivta	Tepper, Bar-Oz and Gini	Daniel Fuks	2016-2017	E	501	5097	Yes	3	1	16	שעורה שש-טורית	Hordeum vulgare hexastichum	חלקי שדרה	rachis fragments	דגניים	Gramineae	6		6		1mm+
SVT-140	Shivta	Tepper, Bar-Oz and Gini	Daniel Fuks	2016-2017	E	504	5029	No	3		20	cf. חיטה/שעורה	cf. Hordeum/Triticum	גרגיר	grain	דגניים	Gramineae			8	8			1
SVT-5	Shivta	Tepper, Bar-Oz and Gini	Daniel Fuks	2016-2017	E	501	5110	Yes	3		10	שעורה שש-טורית	Hordeum vulgare hexastichum	חלקי שדרה	rachis segment	דגניים	Gramineae	1		1		1+
SVT-7	Shivta	Tepper, Bar-Oz and Gini	Daniel Fuks	2016-2018	E	501	5118	Yes	3		8	שעורה שש-טורית	Hordeum vulgare hexastichum	חלקי שדרה	rachis segment	דגניים	Gramineae	2		2		1+
SVT-4	Shivta	Tepper, Bar-Oz and Gini	Daniel Fuks	2016-2017	E	501	5102	Yes	3	1	26	שעורה דו-טורית/התבור	Hordeum vulgare subsp. disticum/spontaneum	פרק ציר שיבולת	rachis fragments	דגניים	Gramineae	9		9		1mm+
SVT-140	Shivta	Tepper, Bar-Oz and Gini	Daniel Fuks	2016-2017	E	504	5029	No	3		24	cf. שעורה דו-טורית (תרבותית)	cf. Hordeum vulgare distichum	בסיס ציר שיבולת	basal rachis fragments	דגניים	Gramineae			8	8			1
SVT-4	Shivta	Tepper, Bar-Oz and Gini	Daniel Fuks	2016-2017	E	501	5102	Yes	3	1	25	שעורה שש-טורית	Hordeum vulgare subsp. hexastichum	פרק ציר שיבולת	rachis fragments	דגניים	Gramineae	18		18		1mm+
SVT-140	Shivta	Tepper, Bar-Oz and Gini	Daniel Fuks	2016-2017	E	504	5029	No	3		26	cf. שעורה דו-טורית/תבור	cf. Hordeum vulgare distichum/spontaneum	פרק ציר שיבולת	rachis fragments	דגניים	Gramineae			18	18			1
SVT-11	Shivta	Tepper, Bar-Oz and Gini	Daniel Fuks	2016-2018	E	503	5018	Yes	3		17	עדשה תרבותית	Lens culinaris					1		1			2
SVT-16	Shivta	Tepper, Bar-Oz and Gini	Daniel Fuks	2016-2017	E	505	5037	Yes	3		19	עדשה תרבותית	Lens culinaris	זרע	seed	פרפרניים	Fabaceae	1		1		1+
SVT-140	Shivta	Tepper, Bar-Oz and Gini	Daniel Fuks	2016-2017	E	504	5029	No	3		29	cf. חיטת הלחם	cf. Triticum aestivum	פרק ציר שיבולת	rachis fragments	דגניים	Gramineae			15	15			1
SVT-140	Shivta	Tepper, Bar-Oz and Gini	Daniel Fuks	2016-2017	E	504	5029	No	3		30	cf. חיטת הלחם	cf. Triticum aestivum	בסיס ציר שיבולת	basal rachis fragments	דגניים	Gramineae			3	3			1
SVT-16	Shivta	Tepper, Bar-Oz and Gini	Daniel Fuks	2016-2017	E	505	5037	Yes	3		20	עדשה תרבותית	Lens culinaris	עוקץ	pedicel	פרפרניים	Fabaceae	1		1		1+
SVT-140	Shivta	Tepper, Bar-Oz and Gini	Daniel Fuks	2016-2017	E	504	5029	No	3		32	חיטה/שעורה	Hordeum/Triticum	פרק ציר שיבולת	rachis fragments	דגניים	Gramineae			35	35			1
SVT-140	Shivta	Tepper, Bar-Oz and Gini	Daniel Fuks	2016-2017	E	504	5029	No	3		33	חיטה/שעורה	Hordeum/Triticum	בסיס ציר שיבולת	basal rachis fragments	דגניים	Gramineae			17	17			1
SVT-140	Shivta	Tepper, Bar-Oz and Gini	Daniel Fuks	2016-2017	E	504	5029	No	3		34	חיטה/שעורה	Hordeum/Triticum	שברי פרק ציר שיבולת	fragments of rachis fragments	דגניים	Gramineae							1
SVT-140	Shivta	Tepper, Bar-Oz and Gini	Daniel Fuks	2016-2017	E	504	5029	No	3		35			פרקי גבעול	culm nodes	דגניים	Gramineae			67	67			1
SVT-140	Shivta	Tepper, Bar-Oz and Gini	Daniel Fuks	2016-2017	E	504	5029	No	3		36			שורשים	roots	דגניים	Gramineae			5	5			1
SVT-140	Shivta	Tepper, Bar-Oz and Gini	Daniel Fuks	2016-2017	E	504	5029	No	3		37	שעורת התבור?		פרח	floret	דגניים	Gramineae			1	1			1
SVT-140	Shivta	Tepper, Bar-Oz and Gini	Daniel Fuks	2016-2017	E	504	5029	No	3		38			שברי מלען וגלומה	glume and awn fragments	דגניים	Gramineae							1
SVT-140	Shivta	Tepper, Bar-Oz and Gini	Daniel Fuks	2016-2017	E	504	5029	No	3		39	זון משכר?	Lolium temulentum?	גרגיר	grain	דגניים	Gramineae			1	1			1
SVT-140	Shivta	Tepper, Bar-Oz and Gini	Daniel Fuks	2016-2017	E	504	5029	No	3		40	זון אשון/רב-שנתי?	Lolium peremme/rigidum?	גרגיר	grain	דגניים	Gramineae			14	14			1
SVT-140	Shivta	Tepper, Bar-Oz and Gini	Daniel Fuks	2016-2017	E	504	5029	No	3		41	עוקצר מצוי?	Brachypodium distachyon?	גרגיר	grain	דגניים	Gramineae			7	7			1
SVT-140	Shivta	Tepper, Bar-Oz and Gini	Daniel Fuks	2016-2017	E	504	5029	No	3		42	חפורית?	Phalaris?	גרגיר	grain	דגניים	Gramineae			5	5			1
SVT-140	Shivta	Tepper, Bar-Oz and Gini	Daniel Fuks	2016-2017	E	504	5029	No	3		43	ברומית?		גרגיר	grain	דגניים	Gramineae			1	1			1		אספנו זרעים ביוני 2018 שמאד דומים לזה
SVT-140	Shivta	Tepper, Bar-Oz and Gini	Daniel Fuks	2016-2017	E	504	5029	No	3		44	דגני-שונות		גרגיר	grain	דגניים	Gramineae							1
SVT-19	Shivta	Tepper, Bar-Oz and Gini	Daniel Fuks	2016-2017	E	507	5045	Yes	1.5		8	עדשה תרבותית	Lens culinaris	זרע	seed	פרפרניים	Fabaceae	1		1		1+
SVT-140	Shivta	Tepper, Bar-Oz and Gini	Daniel Fuks	2016-2017	E	504	5029	No	3		46	זון? ש"ש?		פרק ציר שיבולת	rachis fragments	דגניים	Gramineae			4	4			1
SVT-140	Shivta	Tepper, Bar-Oz and Gini	Daniel Fuks	2016-2017	E	504	5029	No	3		47	דגני		בסיס פרח	rachilla	דגניים	Gramineae			2	2			1
SVT-140	Shivta	Tepper, Bar-Oz and Gini	Daniel Fuks	2016-2017	E	504	5029	No	3		48	שיבולת שועל נפוצה?	Avena sterilis?	בסיס פרח	rachilla	דגניים	Gramineae			1	1			1
SVT-140	Shivta	Tepper, Bar-Oz and Gini	Daniel Fuks	2016-2017	E	504	5029	No	3		49	דגני		מלען מסולסל		דגניים	Gramineae							1
SVT-26	Shivta	Tepper, Bar-Oz and Gini	Daniel Fuks	2016-2017	E	515	5103	Yes	3		9	עדשה תרבותית	Lens culinaris	זרע	seed	פרפרניים	Fabaceae	1		1		1+
SVT-140	Shivta	Tepper, Bar-Oz and Gini	Daniel Fuks	2016-2017	E	504	5029	No	3		51	בקיים		פסיג	cotyledon	פרפרניים	Fabaceae			5	5			1
SVT-140	Shivta	Tepper, Bar-Oz and Gini	Daniel Fuks	2016-2017	E	504	5029	No	3		52	cf. עדשה תרבותית	cf. Lens culinaris	עוקץ	pedicel	פרפרניים	Fabaceae			2	2			1
SVT-140	Shivta	Tepper, Bar-Oz and Gini	Daniel Fuks	2016-2017	E	504	5029	No	3		53	כתרון		זרע	seed	פרפרניים	Fabaceae			1	1			1
SVT-140	Shivta	Tepper, Bar-Oz and Gini	Daniel Fuks	2016-2017	E	504	5029	No	3		54	גרגרנית ערבית?		זרע	seed	פרפרניים	Fabaceae			1	1			1
SVT-140	Shivta	Tepper, Bar-Oz and Gini	Daniel Fuks	2016-2017	E	504	5029	No	3		55	?זנב העקרב השיכני		זרע	seed	פרפרניים	Fabaceae			1	1			1
SVT-140	Shivta	Tepper, Bar-Oz and Gini	Daniel Fuks	2016-2017	E	504	5029	No	3		56	פרפרני להגדרה		זרע	seed	פרפרניים	Fabaceae			1	1			1
SVT-140	Shivta	Tepper, Bar-Oz and Gini	Daniel Fuks	2016-2017	E	504	5029	No	3		57	אספסת		זרע	seed	פרפרניים	Fabaceae			13	13			1
SVT-140	Shivta	Tepper, Bar-Oz and Gini	Daniel Fuks	2016-2017	E	504	5029	No	3		58	אספסת?		שבר תרמיל	pod fragment	פרפרניים	Fabaceae			1	1			1
SVT-140	Shivta	Tepper, Bar-Oz and Gini	Daniel Fuks	2016-2017	E	504	5029	No	3		59	פרפרניים -שונות				פרפרניים	Fabaceae			26	26			1
SVT-4	Shivta	Tepper, Bar-Oz and Gini	Daniel Fuks	2016-2017	E	501	5102	Yes	3	2	58	עדשה תרבותית	Lens culinaris	זרע	seed	פרפרניים	Fabaceae	3	1?	3		1mm+	2
SVT-4	Shivta	Tepper, Bar-Oz and Gini	Daniel Fuks	2016-2017	E	501	5102	Yes	3	2	59	עדשה תרבותית	Lens culinaris	עוקץ	pedicel	פרפרניים	Fabaceae	18		18		1mm+
SVT-140	Shivta	Tepper, Bar-Oz and Gini	Daniel Fuks	2016-2017	E	504	5029	No	3		62	אמיך קוצני?	Emex spinosa?			ארכוביתיים				8	8			1
SVT-5	Shivta	Tepper, Bar-Oz and Gini	Daniel Fuks	2016-2017	E	501	5110	Yes	3		14	עדשה תרבותית	Lens culinaris	זרע	seed	פרפרניים	Fabaceae	1	?	1		1+	2
SVT-5	Shivta	Tepper, Bar-Oz and Gini	Daniel Fuks	2016-2017	E	501	5110	Yes	3		25	עדשה תרבותית	Lens culinaris	עוקץ	pedicel	פרפרניים	Fabaceae	2		2		1+
SVT-1	Shivta	Tepper, Bar-Oz and Gini	Daniel Fuks	2016-2017	E	500	5003	Yes	3	1	6	זון	Lolium	גרגיר	grain	דגניים	Gramineae	1		1		1mm+
SVT-140	Shivta	Tepper, Bar-Oz and Gini	Daniel Fuks	2016-2017	E	504	5029	No	3		66	חלמית	Malva	זרע/פרודה						20	20			1
SVT-140	Shivta	Tepper, Bar-Oz and Gini	Daniel Fuks	2016-2017	E	504	5029	No	3		67	צלע השור		זרע/פרודה						2	2			1
SVT-140	Shivta	Tepper, Bar-Oz and Gini	Daniel Fuks	2016-2017	E	504	5029	No	3		68	לחך		זרע						5	5			1
SVT-10	Shivta	Tepper, Bar-Oz and Gini	Daniel Fuks	2016-2018	E	503	5016	Yes	3		44	זון	Lolium	גלומה	glume			1		1	1	1
SVT-140	Shivta	Tepper, Bar-Oz and Gini	Daniel Fuks	2016-2017	E	504	5029	No	3		70	?גלעינית זעירת פרחים		זרע						1	1			1
SVT-140	Shivta	Tepper, Bar-Oz and Gini	Daniel Fuks	2016-2017	E	504	5029	No	3		71	?ארנבית שרועה		זרע						4	4			1
SVT-140	Shivta	Tepper, Bar-Oz and Gini	Daniel Fuks	2016-2017	E	504	5029	No	3		45	זון	Lolium	פרק ציר שיבולת	rachis fragments	דגניים	Gramineae			1	1			1
SVT-140	Shivta	Tepper, Bar-Oz and Gini	Daniel Fuks	2016-2017	E	504	5029	No	3		73	דמומית?								2	2			1
SVT-140	Shivta	Tepper, Bar-Oz and Gini	Daniel Fuks	2016-2017	E	504	5029	No	3		74	קחוון????		זרעונים על שבר קרקפת		מורכבים								1
SVT-140	Shivta	Tepper, Bar-Oz and Gini	Daniel Fuks	2016-2017	E	504	5029	No	3		75	אשל?		גזע זרדים										1
SVT-140	Shivta	Tepper, Bar-Oz and Gini	Daniel Fuks	2016-2017	E	504	5029	No	3		76	פיגמית??								1	1			1
SVT-140	Shivta	Tepper, Bar-Oz and Gini	Daniel Fuks	2016-2017	E	504	5029	No	3		77	חרק להגדרה												1
SVT-4	Shivta	Tepper, Bar-Oz and Gini	Daniel Fuks	2016-2017	E	501	5102	Yes	3	1	41	זון אשון	Lolium	פרק ציר שיבולת	rachis fragments	דגניים	Gramineae	1		1		1mm+
SVT-140	Shivta	Tepper, Bar-Oz and Gini	Daniel Fuks	2016-2017	E	504	5029	No	3		79	בלתי ליואל								7	7			1
SVT-140	Shivta	Tepper, Bar-Oz and Gini	Daniel Fuks	2016-2017	E	504	5029	No	3		80	cf. חלמית מצרית			אגוזית					1	1			1
SVT-140	Shivta	Tepper, Bar-Oz and Gini	Daniel Fuks	2016-2017	E	504	5029	No	3		81	למיין וליואל												1
SVT-140	Shivta	Tepper, Bar-Oz and Gini	Daniel Fuks	2016-2017	E	504	5029	No	3		82	בלתי שונות												1
SVT-140	Shivta	Tepper, Bar-Oz and Gini	Daniel Fuks	2016-2017	E	504	5029	No	3		83													1
SVT-140	Shivta	Tepper, Bar-Oz and Gini	Daniel Fuks	2016-2017	E	504	5029	No	3		84													1
SVT-140	Shivta	Tepper, Bar-Oz and Gini	Daniel Fuks	2016-2017	E	504	5029	No	3															1					יואל: ספק פרפרני, אפשר לשבת על זה	לחבר עם 241 בתור ספק פרפרניים
SVT-4	Shivta	Tepper, Bar-Oz and Gini	Daniel Fuks	2016-2017	E	501	5102	Yes	3	1	19	זון אשון/רב-שנתי	Lolium rigidum/perenne	גרגיר	grain	דגניים	Gramineae	8		8		1mm+
SVT-15	Shivta	Tepper, Bar-Oz and Gini	Daniel Fuks	2016-2017	E	505	5031	Yes	3	1	2	חיטה	Triticum	גרגיר	grain	דגניים	Gramineae	5	3	8	8	2	2
SVT-15	Shivta	Tepper, Bar-Oz and Gini	Daniel Fuks	2016-2017	E	505	5031	Yes	3	1	3	חיטה/שעורה	Hordeum/Triticum	גרגיר	grain	דגניים	Gramineae	3	1	4	4	2	2
SVT-4	Shivta	Tepper, Bar-Oz and Gini	Daniel Fuks	2016-2017	E	501	5102	Yes	3	1	15	זון משכר	Lolium temulentum	גרגיר	grain	דגניים	Gramineae	1		1		1mm+
SVT-12	Shivta	Tepper, Bar-Oz and Gini				503	5019				42	חלמית מצרית	Malva Aegyptica		Malva aegyptia			2		2	2
SVT-4	Shivta	Tepper, Bar-Oz and Gini	Daniel Fuks	2016-2017	E	501	5102	Yes	3		86	חלמית חדת-אונות/קטנת פרחים	Malva parviflora/oxyloba	זרע	seed	חלמיתיים	Malvaceae	7		7		1+
SVT-15	Shivta	Tepper, Bar-Oz and Gini	Daniel Fuks	2016-2017	E	505	5031	Yes	3		7			מפרק גבעול	culm node	דגניים	Gramineae	17		17		1+
SVT-15	Shivta	Tepper, Bar-Oz and Gini	Daniel Fuks	2016-2017	E	505	5031	Yes	3		8			שורשים	roots	דגניים	Gramineae	7		7		1+
SVT-15	Shivta	Tepper, Bar-Oz and Gini	Daniel Fuks	2016-2017	E	505	5031	Yes	3		9	שעורה שש-טורית?	Hordeum vulgare hexastichum?	חלקי שדרה	rachis segment	דגניים	Gramineae	3		3		1+
SVT-4	Shivta	Tepper, Bar-Oz and Gini	Daniel Fuks	2016-2017	E	501	5102	Yes	3		198	חלמית חדת-אונות/קטנת פרחים	Malva parviflora/oxyloba	זרע	seed	חלמיתיים	Malvaceae	1		1		0.5
SVT-15	Shivta	Tepper, Bar-Oz and Gini	Daniel Fuks	2016-2017	E	505	5031	Yes	3		11	חיטה/שעורה	Hordeum/Triticum	חלקי שדרה	rachis segment	דגניים	Gramineae	1		1		1+
SVT-4	Shivta	Tepper, Bar-Oz and Gini	Daniel Fuks	2016-2017	E	501	5102	Yes	3	2	170	גרגרנית הכוכב	Medicago astroites	זרע	seed	פרפרניים	Fabaceae	3		3		0.5
SVT-4	Shivta	Tepper, Bar-Oz and Gini	Daniel Fuks	2016-2017	E	501	5102	Yes	3	2	68	אספסת מצויה/הים	Medicago polymorpha/marina	זרע	seed	פרפרניים	Fabaceae	5		5		1+
SVT-1	Shivta	Tepper, Bar-Oz and Gini	Daniel Fuks	2016-2017	E	500	5003	Yes	3		22	אספסת	Medicago sp.	זרע	seed	פרפרניים	Fabaceae	21		21		1mm+
SVT-6	Shivta	Tepper, Bar-Oz and Gini	Daniel Fuks	2016-2017	E	501	5111	Yes	3		20	אספסת	Medicago sp.	תרמיל	pod	פרפרניים	Fabaceae	1		1		1+					2של 1מ"מ
SVT-15	Shivta	Tepper, Bar-Oz and Gini	Daniel Fuks	2016-2017	E	505	5031	Yes	3		16	בלתי ליואל	Tribe: Salsoleae??					1		1		1+					3של 1מ"מ
SVT-15	Shivta	Tepper, Bar-Oz and Gini	Daniel Fuks	2016-2017	E	505	5031	Yes	3		17	להגדרה		תרמיל	pod	?פרפרניים	Fabaceae?	1		1		1+					1של 1מ"מ
SVT-15	Shivta	Tepper, Bar-Oz and Gini	Daniel Fuks	2016-2017	E	505	5031	Yes	3		18	אספסת	Medicago	תרמיל	pod	פרפרניים	Fabaceae	1		1		1+
SVT-15	Shivta	Tepper, Bar-Oz and Gini	Daniel Fuks	2016-2017	E	505	5031	Yes	3		19	בלתי ליואל										1+
SVT-15	Shivta	Tepper, Bar-Oz and Gini	Daniel Fuks	2016-2017	E	505	5031	Yes	3		20	בלתי ליואל										1+
SVT-15	Shivta	Tepper, Bar-Oz and Gini	Daniel Fuks	2016-2017	E	505	5031	Yes	3		21	בלתי-שונות										1+	2
SVT-15	Shivta	Tepper, Bar-Oz and Gini	Daniel Fuks	2016-2017	E	505	5031	Yes	3		22	בלתי ליואל							1				2
SVT-15	Shivta	Tepper, Bar-Oz and Gini	Daniel Fuks	2016-2017	E	505	5031	Yes	3		23	גלל											2
SVT-1	Shivta	Tepper, Bar-Oz and Gini	Daniel Fuks	2016-2017	E	500	5003	Yes	3		60	אהל מצוי	Mesembryanthemum nodiflorum	אגוזית	nutlet	חיעדיים	Aizoaceae					1mm+			רצנטי?
SVT-16	Shivta	Tepper, Bar-Oz and Gini	Daniel Fuks	2016-2017	E	505	5037	Yes	3		2	חיטה	Triticum	גרגיר	grain	דגניים	Gramineae	24		24	24	2
SVT-16	Shivta	Tepper, Bar-Oz and Gini	Daniel Fuks	2016-2017	E	505	5037	Yes	3		3	חיטה/שעורה	Hordeum/Triticum	גרגיר	grain	דגניים	Gramineae	2	2	4	4	2	2
SVT-16	Shivta	Tepper, Bar-Oz and Gini	Daniel Fuks	2016-2017	E	505	5037	Yes	3		4	שעורה?	Hordeum?	פרח	floret	דגניים	Gramineae	1		1		1+
SVT-16	Shivta	Tepper, Bar-Oz and Gini	Daniel Fuks	2016-2017	E	505	5037	Yes	3		5			פרק גבעול	culm node	דגניים	Gramineae	71		71		1+
SVT-16	Shivta	Tepper, Bar-Oz and Gini	Daniel Fuks	2016-2017	E	505	5037	Yes	3		6			שורשים	roots	דגניים	Gramineae	22		22		1+
SVT-10	Shivta	Tepper, Bar-Oz and Gini	Daniel Fuks	2016-2018	E	503	5016	Yes	3		15	אהל מצוי	Mesembryanthemum nodiflorum	יחידות הפצה וזרעים	dispersal units and seeds	חיעדיים	Aizoaceae					1+
SVT-11	Shivta	Tepper, Bar-Oz and Gini	Daniel Fuks	2016-2018	E	503	5018	Yes	3		14	אהל מצוי	Mesembryanthemum nodiflorum	אגוזית	Mesembryanthemum nodiflorum	חיעדיים	Aizoaceae					1+
SVT-12	Shivta	Tepper, Bar-Oz and Gini	Daniel Fuks	2016-2018	E	503	5019	Yes	3		17	אהל מצוי	Mesembryanthemum nodiflorum	אגוזית	Mesembryanthemum nodiflorum	חיעדיים	Aizoaceae					1+
SVT-12	Shivta	Tepper, Bar-Oz and Gini				503	5019				44	אהל מצוי	Mesembryanthemum nodiflorum					11		11	11
SVT-16	Shivta	Tepper, Bar-Oz and Gini	Daniel Fuks	2016-2017	E	505	5037	Yes	3		11			חלקי שדרה	rachis segment	דגניים	Gramineae	5		5		1+
SVT-16	Shivta	Tepper, Bar-Oz and Gini	Daniel Fuks	2016-2017	E	505	5037	Yes	3		12			שברי גלומה ומלען	glume and awn fragments	דגניים	Gramineae					1+
SVT-16	Shivta	Tepper, Bar-Oz and Gini	Daniel Fuks	2016-2017	E	505	5037	Yes	3		13			שברי גרגיר	grain fragments	דגניים	Gramineae					1+
SVT-16	Shivta	Tepper, Bar-Oz and Gini	Daniel Fuks	2016-2017	E	505	5037	Yes	3		14	שיבולת שועל?	Avena?	גרגיר	grain	דגניים	Gramineae	1		1		1+
SVT-16	Shivta	Tepper, Bar-Oz and Gini	Daniel Fuks	2016-2017	E	505	5037	Yes	3		15	דגני?						1		1		1+
SVT-16	Shivta	Tepper, Bar-Oz and Gini	Daniel Fuks	2016-2017	E	505	5037	Yes	3		16	יבלית מצויה?						4		4		1+
SVT-16	Shivta	Tepper, Bar-Oz and Gini	Daniel Fuks	2016-2017	E	505	5037	Yes	3		17	דגני?						1		1		1+
SVT-13	Shivta	Tepper, Bar-Oz and Gini	Daniel Fuks	2016-2018	E	503	5039	Yes	3		22	אהל מצוי	Mesembryanthemum nodiflorum	אגוזית		חיעדיים	Aizoaceae	3		3		2
SVT-13	Shivta	Tepper, Bar-Oz and Gini				503	5039				89	אהל מצוי	Mesembryanthemum nodiflorum									<2
SVT-14	Shivta	Tepper, Bar-Oz and Gini	Daniel Fuks	2016-2018	E	504	5029	Yes	3		18	אהל מצוי	Mesembryanthemum nodiflorum	אגוזית	nutlet	חיעדיים	Aizoaceae					1+
SVT-140	Shivta	Tepper, Bar-Oz and Gini	Daniel Fuks	2016-2017	E	504	5029	No	3		78	אהל מצוי	Mesembryanthemum nodiflorum											1
SVT-16	Shivta	Tepper, Bar-Oz and Gini	Daniel Fuks	2016-2017	E	505	5037	Yes	3		34	אהל מצוי	Mesembryanthemum nodiflorum	אגוזית	nutlet	חיעדיים	Aizoaceae					1+
SVT-3	Shivta	Tepper, Bar-Oz and Gini	Daniel Fuks	2016-2017	E	501	5097	Yes	3		60	אהל מצוי	Mesembryanthemum nodiflorum	אגוזית	nutlet	חיעדיים	Aizoaceae	3		3		1mm+			2מפוחמים
SVT-4	Shivta	Tepper, Bar-Oz and Gini	Daniel Fuks	2016-2017	E	501	5102	Yes	3		83	אהל מצוי	Mesembryanthemum nodiflorum	אגוזית	nutlet	חיעדיים	Aizoaceae					1+
SVT-16	Shivta	Tepper, Bar-Oz and Gini	Daniel Fuks	2016-2017	E	505	5037	Yes	3		25	פרפרני קטן		זרע	seed	פרפרניים	Fabaceae	3		3		1+
SVT-16	Shivta	Tepper, Bar-Oz and Gini	Daniel Fuks	2016-2017	E	505	5037	Yes	3		26	קחוון?		זרעון?		מורכבים?	Asteraceae?	1		1		1+
SVT-16	Shivta	Tepper, Bar-Oz and Gini	Daniel Fuks	2016-2017	E	505	5037	Yes	3		27	בלתי ליואל						1		1		1+
SVT-16	Shivta	Tepper, Bar-Oz and Gini	Daniel Fuks	2016-2017	E	505	5037	Yes	3		28	בלתי ליואל						2		2		1+
SVT-16	Shivta	Tepper, Bar-Oz and Gini	Daniel Fuks	2016-2017	E	505	5037	Yes	3		29	בלתי ליואל						1		1		1+
SVT-16	Shivta	Tepper, Bar-Oz and Gini	Daniel Fuks	2016-2017	E	505	5037	Yes	3		30	בלתי ליואל						1		1		1+
SVT-16	Shivta	Tepper, Bar-Oz and Gini	Daniel Fuks	2016-2017	E	505	5037	Yes	3		31	בלתי		זרע	seed			2		2		1+
SVT-16	Shivta	Tepper, Bar-Oz and Gini	Daniel Fuks	2016-2017	E	505	5037	Yes	3		32	כף-אווז?		זרע	seed			2		2		1+
SVT-16	Shivta	Tepper, Bar-Oz and Gini	Daniel Fuks	2016-2017	E	505	5037	Yes	3		33	להגדרה		זרעון		מורכבים	Asteraceae	1		1		1+
SVT-4	Shivta	Tepper, Bar-Oz and Gini	Daniel Fuks	2016-2017	E	501	5102	Yes	3		196	אהל מצוי	Mesembryanthemum nodiflorum	אגוזית	nutlet	חיעדיים	Aizoaceae	9		9		0.5
SVT-16	Shivta	Tepper, Bar-Oz and Gini	Daniel Fuks	2016-2017	E	505	5037	Yes	3		35	בלתי-שונות										1+	2
SVT-16	Shivta	Tepper, Bar-Oz and Gini	Daniel Fuks	2016-2017	E	505	5037	Yes	3		36	גלל						2		2		1+
SVT-16	Shivta	Tepper, Bar-Oz and Gini	Daniel Fuks	2016-2017	E	505	5037	Yes	3		37	אספסת	Medicago	תרמיל	pod				1				2				1של 1מ"מ
SVT-8	Shivta	Tepper, Bar-Oz and Gini	Daniel Fuks	2016-2018	E	502	5010	Yes	3		18	אהל מצוי	Mesembryanthemum nodiflorum	אגוזית	nutlet	חיעדיים	Aizoaceae	1		1		0.3+					1של 1מ"מ
SVT-4	Shivta	Tepper, Bar-Oz and Gini	Daniel Fuks	2016-2017	E	501	5102	Yes	3		114	פרג	Papaver sp.	זרע	seed	פרגיים	Papaveraceae	1		1		1+					1של 1מ"מ
SVT-10	Shivta	Tepper, Bar-Oz and Gini	Daniel Fuks	2016-2018	E	503	5016	Yes	3		42	פרג/ה	Papaver/Glaucium	זרע	seed			1		1	1	1
SVT-17	Shivta	Tepper, Bar-Oz and Gini	Daniel Fuks	2016-2017	E	507	5133	Yes	1.5		3			פרק גבעול	culm node	דגניים	Gramineae	1		1		1+
SVT-17	Shivta	Tepper, Bar-Oz and Gini	Daniel Fuks	2016-2017	E	507	5133	Yes	1.5		4	בקיית הכרשינה?	Vicia ervilia?	זרע	seed	פרפרניים	Fabaceae	1		1		1+
SVT-17	Shivta	Tepper, Bar-Oz and Gini	Daniel Fuks	2016-2017	E	507	5133	Yes	1.5		5	בלתי ליואל						1		1		1+
SVT-17	Shivta	Tepper, Bar-Oz and Gini	Daniel Fuks	2016-2017	E	507	5133	Yes	1.5		6	בלתי ליואל						2		2		1+
SVT-18	Shivta	Tepper, Bar-Oz and Gini	Daniel Fuks	2016-2017	E	507	5137	Yes	3		1			קליפה חיצונית	exocarp	ורדניים?	Rosaceae?					1+
SVT-18	Shivta	Tepper, Bar-Oz and Gini	Daniel Fuks	2016-2017	E	507	5137	Yes	3		2	בלתי										1+
SVT-18	Shivta	Tepper, Bar-Oz and Gini	Daniel Fuks	2016-2017	E	507	5137	Yes	3		3	בלתי										1+
SVT-10	Shivta	Tepper, Bar-Oz and Gini	Daniel Fuks	2016-2018	E	503	5016	Yes	3		48	חפורית	Phalaris					3		3	3	1
SVT-19	Shivta	Tepper, Bar-Oz and Gini	Daniel Fuks	2016-2017	E	507	5045	Yes	1.5		2	חיטה	Triticum	גרגיר	grain	דגניים	Gramineae	6		6	6	2
SVT-19	Shivta	Tepper, Bar-Oz and Gini	Daniel Fuks	2016-2017	E	507	5045	Yes	1.5		3	חיטה/שעורה	Hordeum/Triticum	גרגיר	grain	דגניים	Gramineae	2		2	2	1+
SVT-19	Shivta	Tepper, Bar-Oz and Gini	Daniel Fuks	2016-2017	E	507	5045	Yes	1.5		4			פרק גבעול	culm node	דגניים	Gramineae	2		2		1+
SVT-19	Shivta	Tepper, Bar-Oz and Gini	Daniel Fuks	2016-2017	E	507	5045	Yes	1.5		5			שורשים	roots	דגניים	Gramineae	2		2		1+
SVT-11	Shivta	Tepper, Bar-Oz and Gini				503	5018				24	חפורית	Phalaris		Phalaris			1		1	1
SVT-13	Shivta	Tepper, Bar-Oz and Gini				503	5039				59	חפורית	Phalaris					44		44	44	<2
SVT-5	Shivta	Tepper, Bar-Oz and Gini	Daniel Fuks	2016-2017	E	501	5110	Yes	3		22	חפורית	Phalaris	גרגיר	grain	דגניים	Gramineae	3		3		1+
SVT-19	Shivta	Tepper, Bar-Oz and Gini	Daniel Fuks	2016-2017	E	507	5045	Yes	1.5		9	אספסת	Medicago	תרמיל	pod	פרפרניים	Fabaceae	1		1		1+
SVT-8	Shivta	Tepper, Bar-Oz and Gini	Daniel Fuks	2016-2018	E	502	5010	Yes	3		10	חפורית	Phalaris	גרגיר	grain	דגניים	Gramineae	2		2		0.3+
SVT-19	Shivta	Tepper, Bar-Oz and Gini	Daniel Fuks	2016-2017	E	507	5045	Yes	1.5		11	בלתי						1		1		1+
SVT-4	Shivta	Tepper, Bar-Oz and Gini	Daniel Fuks	2016-2017	E	501	5102	Yes	3	1	18	חפורית קטנה	Phalaris minor	גרגיר	grain	דגניים	Gramineae	5		5		1mm+
SVT-2	Shivta	Tepper, Bar-Oz and Gini	Daniel Fuks	2016-2017	E	501	5006	Yes	3	1	2	חיטה	Triticum	גרגיר	grain	דגניים	Gramineae	8	3	11	11	1mm+
SVT-2	Shivta	Tepper, Bar-Oz and Gini	Daniel Fuks	2016-2017	E	501	5006	Yes	3	1	3	חיטה/שעורה	Hordeum/Triticum	גרגיר	grain	דגניים	Gramineae	5		5	5	1mm+
SVT-4	Shivta	Tepper, Bar-Oz and Gini	Daniel Fuks	2016-2017	E	501	5102	Yes	3	1	152	חפורית קטנה	Phalaris minor	גרגיר	grain	דגניים	Gramineae	11		11		0.5
SVT-4	Shivta	Tepper, Bar-Oz and Gini	Daniel Fuks	2016-2017	E	501	5102	Yes	3		125	חפורית מוזרה	Phalaris paradoxa	שיבולית	spikelet	דגניים	Gramineae	1		1		1+
SVT-1	Shivta	Tepper, Bar-Oz and Gini	Daniel Fuks	2016-2017	E	500	5003	Yes	3	3	18	תמר מצוי	Phoenix dactylifera	גלעין	stone	דקליים	Palmae	1		1	1	2mm					2של 1מ"מ
SVT-2	Shivta	Tepper, Bar-Oz and Gini	Daniel Fuks	2016-2017	E	501	5006	Yes	3	1	7			שברי מלען	awn fragments	דגניים	Gramineae					1mm+
SVT-2	Shivta	Tepper, Bar-Oz and Gini	Daniel Fuks	2016-2017	E	501	5006	Yes	3	1	8			פרקי גבעול	culm nodes	דגניים	Gramineae	14		14		1mm+
SVT-10	Shivta	Tepper, Bar-Oz and Gini	Daniel Fuks	2016-2018	E	503	5016	Yes	3		19	תמר מצוי	Phoenix dactylifera	שבר גלעין					1				2
SVT-13	Shivta	Tepper, Bar-Oz and Gini	Daniel Fuks	2016-2018	E	503	5039	Yes	3		28	תמר מצוי	Phoenix dactylifera	שבר גלעין					1			2	2
SVT-14	Shivta	Tepper, Bar-Oz and Gini	Daniel Fuks	2016-2018	E	504	5029	Yes	3		28	תמר מצוי	Phoenix dactylifera	שבר גלעין					1	1	1		2
SVT-2	Shivta	Tepper, Bar-Oz and Gini	Daniel Fuks	2016-2017	E	501	5006	Yes	3	1	12	שעורה שש-טורית?	Hordeum vulgare hexastichum?	חלקי שדרה	rachis fragments	דגניים	Gramineae	3		3		1mm+
SVT-2	Shivta	Tepper, Bar-Oz and Gini	Daniel Fuks	2016-2017	E	501	5006	Yes	3	1	13	שעורה דו-טורית?	Hordeum vulgare disticum?	חלקי שדרה	rachis fragments	דגניים	Gramineae	11		11		1mm+
SVT-140	Shivta	Tepper, Bar-Oz and Gini	Daniel Fuks	2016-2017	E	504	5029	No	3		15	תמר מצוי	Phoenix dactylifera	גלעין	stone	דקליים	Palmae			1	1			2
SVT-2	Shivta	Tepper, Bar-Oz and Gini	Daniel Fuks	2016-2017	E	501	5006	Yes	3	1	15			בסיס ראכיס	rachis base	דגניים	Gramineae	4		4		1mm+
SVT-2	Shivta	Tepper, Bar-Oz and Gini	Daniel Fuks	2016-2017	E	501	5006	Yes	3	1	16			חלקי שדרה	rachis fragments	דגניים	Gramineae					1mm+
SVT-2	Shivta	Tepper, Bar-Oz and Gini	Daniel Fuks	2016-2017	E	501	5006	Yes	3	1	17			חלקי שדרה	rachis fragments	דגניים	Gramineae					1mm+
SVT-2	Shivta	Tepper, Bar-Oz and Gini	Daniel Fuks	2016-2017	E	501	5006	Yes	3	1	18			פרק בסיס	culm base	דגניים	Gramineae	1		1		1mm+
SVT-2	Shivta	Tepper, Bar-Oz and Gini	Daniel Fuks	2016-2017	E	501	5006	Yes	3	1	19			שורשי דגן	culm roots	דגניים	Gramineae	2		2		1mm+
SVT-2	Shivta	Tepper, Bar-Oz and Gini	Daniel Fuks	2016-2017	E	501	5006	Yes	3	1	20	דגני להגדרה		גרגיר	grain	דגניים	Gramineae	2		2		1mm+
SVT-2	Shivta	Tepper, Bar-Oz and Gini	Daniel Fuks	2016-2017	E	501	5006	Yes	3	1	21	דגני		גרגיר	grain	דגניים	Gramineae	2		2		1mm+
SVT-2	Shivta	Tepper, Bar-Oz and Gini	Daniel Fuks	2016-2017	E	501	5006	Yes	3	1	22	דגני?		עובר?	embryo	דגניים?	Gramineae?	1		1		1mm+
SVT-2	Shivta	Tepper, Bar-Oz and Gini	Daniel Fuks	2016-2017	E	501	5006	Yes	3	1	23			שברי גרגיר	grain fragments	דגניים	Gramineae					1mm+
SVT-2	Shivta	Tepper, Bar-Oz and Gini	Daniel Fuks	2016-2017	E	501	5006	Yes	3	3	24	גפן?	Vitis vinifera?	קליפה	skin	גפניים	Vitaceae	1		1		1mm+
SVT-2	Shivta	Tepper, Bar-Oz and Gini	Daniel Fuks	2016-2017	E	501	5006	Yes	3	2	25	אספסת?		זרע	seed	פרפרניים	Fabaceae	4		4		1mm+
SVT-2	Shivta	Tepper, Bar-Oz and Gini	Daniel Fuks	2016-2017	E	501	5006	Yes	3	2	26	קדד? גרגרנית?		זרע	seed	פרפרניים	Fabaceae	1		1		1mm+
SVT-2	Shivta	Tepper, Bar-Oz and Gini	Daniel Fuks	2016-2017	E	501	5006	Yes	3	2	27	בלתי		זרע	seed	פרפרניים	Fabaceae	10		10		1mm+
SVT-2	Shivta	Tepper, Bar-Oz and Gini	Daniel Fuks	2016-2017	E	501	5006	Yes	3	2	28	בלתי		זרע	seed	פרפרניים	Fabaceae	1		1		1mm+
SVT-2	Shivta	Tepper, Bar-Oz and Gini	Daniel Fuks	2016-2017	E	501	5006	Yes	3	2	29	פרפרניים- שונות		זרע	seed	פרפרניים	Fabaceae	16		16		1mm+
SVT-2	Shivta	Tepper, Bar-Oz and Gini	Daniel Fuks	2016-2017	E	501	5006	Yes	3	6	30	חלמית	Malva	זרע	seed	חלמיתיים	Malvaceae					1mm+
SVT-16	Shivta	Tepper, Bar-Oz and Gini	Daniel Fuks	2016-2017	E	505	5037	Yes	3		38	תמר מצוי	Phoenix dactylifera	שבר גלעין					1		1		2
SVT-2	Shivta	Tepper, Bar-Oz and Gini	Daniel Fuks	2016-2017	E	501	5006	Yes	3	5	32	מתנן שעיר?	Thymelaea hirsuta?	ניצן	bud	מתנניים?	Thymelaeaceae?					1mm+
SVT-2	Shivta	Tepper, Bar-Oz and Gini	Daniel Fuks	2016-2017	E	501	5006	Yes	3		49	תמר מצוי	Phoenix dactylifera	שבר גלעין					1	1	1		2
SVT-2	Shivta	Tepper, Bar-Oz and Gini	Daniel Fuks	2016-2017	E	501	5006	Yes	3		34	יפרוק? חמד?				סלקיים	Chenopodiaceae	5		5		1mm+
SVT-2	Shivta	Tepper, Bar-Oz and Gini	Daniel Fuks	2016-2017	E	501	5006	Yes	3		35	ניצנים להגדרה						3		3		1mm+
SVT-2	Shivta	Tepper, Bar-Oz and Gini	Daniel Fuks	2016-2017	E	501	5006	Yes	3		36	ארנבית שרועה?						1		1		1mm+
SVT-2	Shivta	Tepper, Bar-Oz and Gini	Daniel Fuks	2016-2017	E	501	5006	Yes	3		37	בן-שלח?						2		2		1mm+
SVT-2	Shivta	Tepper, Bar-Oz and Gini	Daniel Fuks	2016-2017	E	501	5006	Yes	3		38	ארכוביתי?						2		2		1mm+
SVT-2	Shivta	Tepper, Bar-Oz and Gini	Daniel Fuks	2016-2017	E	501	5006	Yes	3		39	לחך?						1		1		1mm+
SVT-2	Shivta	Tepper, Bar-Oz and Gini	Daniel Fuks	2016-2017	E	501	5006	Yes	3		40	בלתי						1		1		1mm+					1של 1מ"מ
SVT-2	Shivta	Tepper, Bar-Oz and Gini	Daniel Fuks	2016-2017	E	501	5006	Yes	3		41	בלתי						1		1		1mm+
SVT-2	Shivta	Tepper, Bar-Oz and Gini	Daniel Fuks	2016-2017	E	501	5006	Yes	3		42	בלתי						1		1		1mm+
SVT-2	Shivta	Tepper, Bar-Oz and Gini	Daniel Fuks	2016-2017	E	501	5006	Yes	3		43	בלתי						1		1		1mm+
SVT-2	Shivta	Tepper, Bar-Oz and Gini	Daniel Fuks	2016-2017	E	501	5006	Yes	3		44	בלתי						1		1		1mm+
SVT-2	Shivta	Tepper, Bar-Oz and Gini	Daniel Fuks	2016-2017	E	501	5006	Yes	3		45	בלתי						1		1		1mm+
SVT-2	Shivta	Tepper, Bar-Oz and Gini	Daniel Fuks	2016-2017	E	501	5006	Yes	3		46	בלתי						1		1		1mm+
SVT-2	Shivta	Tepper, Bar-Oz and Gini	Daniel Fuks	2016-2017	E	501	5006	Yes	3		47	בלתי-שונות										1mm+
SVT-2	Shivta	Tepper, Bar-Oz and Gini	Daniel Fuks	2016-2017	E	501	5006	Yes	3		48	גללים										1mm+
SVT-27	Shivta	Tepper, Bar-Oz and Gini	Daniel Fuks	2016-2017	E	516	5130	Yes	3		8	תמר מצוי	Phoenix dactylifera	שבר גלעין					1			1+	2
SVT-2	Shivta	Tepper, Bar-Oz and Gini	Daniel Fuks	2016-2017	E	501	5006	Yes	3		50	עצם							1				2
SVT-20	Shivta	Tepper, Bar-Oz and Gini	Daniel Fuks	2016-2017	E	508	5048	Yes	3		1	חיטה/שעורה	Hordeum/Triticum	גרגיר	grain	דגניים	Gramineae	1		1	1	2
SVT-20	Shivta	Tepper, Bar-Oz and Gini	Daniel Fuks	2016-2017	E	508	5048	Yes	3		2			פרק גבעול	culm node	דגניים	Gramineae	3		3		1+
SVT-20	Shivta	Tepper, Bar-Oz and Gini	Daniel Fuks	2016-2017	E	508	5048	Yes	3		3	חרק?						1		1		1+
SVT-21	Shivta	Tepper, Bar-Oz and Gini	Daniel Fuks	2016-2017	E	510	5059	Yes	3		1	חרק?										1+
SVT-21	Shivta	Tepper, Bar-Oz and Gini	Daniel Fuks	2016-2018	E	510	5059	Yes	3		2	בלתי ליואל							1				2
SVT-4	Shivta	Tepper, Bar-Oz and Gini	Daniel Fuks	2016-2017	E	501	5102	Yes	3	3	76	תמר מצוי	Phoenix dactylifera	שבר גלעין	stone fragment	דקליים	Palmae	1	1	1	1	1+	2
SVT-22	Shivta	Tepper, Bar-Oz and Gini	Daniel Fuks	2016-2017	E	511	5084	Yes	3		2	חיטה	Triticum	גרגיר	grain	דגניים	Gramineae	1		1	1	2
SVT-22	Shivta	Tepper, Bar-Oz and Gini	Daniel Fuks	2016-2017	E	511	5084	Yes	3		3	חיטה/שעורה	Hordeum/Triticum	גרגיר	grain	דגניים	Gramineae	1		1	1	2
SVT-7	Shivta	Tepper, Bar-Oz and Gini				501	5118				31	תמר מצוי	Phoenix dactylifera	שבר גלעין					1		1		2
SVT-22	Shivta	Tepper, Bar-Oz and Gini	Daniel Fuks	2016-2017	E	511	5084	Yes	3		5			פרק גבעול	culm node	דגניים	Gramineae	2		2		1+
SVT-22	Shivta	Tepper, Bar-Oz and Gini	Daniel Fuks	2016-2017	E	511	5084	Yes	3		6	קטנית						1		1		1+
SVT-22	Shivta	Tepper, Bar-Oz and Gini	Daniel Fuks	2016-2017	E	511	5084	Yes	3		7	בלתי										1+
SVT-12	Shivta	Tepper, Bar-Oz and Gini				503	5019				31	לחך	Plantago					1		1	1
SVT-22	Shivta	Tepper, Bar-Oz and Gini	Daniel Fuks	2016-2017	E	511	5084	Yes	3		9	זכוכית ועצם											2
SVT-23	Shivta	Tepper, Bar-Oz and Gini	Daniel Fuks	2016-2017	E	511	5088	Yes	3		1	שעורה תרבותית?	Hordeum vulgare?	גרגיר	grain	דגניים	Gramineae	1	1	1		2	2
SVT-23	Shivta	Tepper, Bar-Oz and Gini	Daniel Fuks	2016-2017	E	511	5088	Yes	3		2			פרק גבעול	culm node	דגניים	Gramineae	2		2		1+
SVT-23	Shivta	Tepper, Bar-Oz and Gini	Daniel Fuks	2016-2017	E	511	5088	Yes	3		3			שורשים	roots	דגניים	Gramineae	1		1		1+
SVT-23	Shivta	Tepper, Bar-Oz and Gini	Daniel Fuks	2016-2017	E	511	5088	Yes	3		4	רימון?		קליפה								1+
SVT-23	Shivta	Tepper, Bar-Oz and Gini	Daniel Fuks	2016-2017	E	511	5088	Yes	3		5	בלתי										1+	2
SVT-24	Shivta	Tepper, Bar-Oz and Gini	Daniel Fuks	2016-2017	E	514	5084	Yes	3		1	שעורה תרבותית?	Hordeum vulgare?	גרגיר	grain	דגניים	Gramineae	1		1		2
SVT-4	Shivta	Tepper, Bar-Oz and Gini	Daniel Fuks	2016-2017	E	501	5102	Yes	3		200	לחך הנגב/משונן	Plantago chamaepsyllium/notata	זרע	seed	לחכיים	Plantaginaceae	2		2		0.5
SVT-24	Shivta	Tepper, Bar-Oz and Gini	Daniel Fuks	2016-2017	E	514	5084	Yes	3		3	בלתי										1+
SVT-25	Shivta	Tepper, Bar-Oz and Gini	Daniel Fuks	2016-2017	E	514	5091	Yes	3		1			פרק גבעול	culm node	דגניים	Gramineae	1		1		1+
SVT-25	Shivta	Tepper, Bar-Oz and Gini	Daniel Fuks	2016-2017	E	514	5091	Yes	3		2	לחיבור										1+
SVT-5	Shivta	Tepper, Bar-Oz and Gini	Daniel Fuks	2016-2017	E	501	5110	Yes	3		29	לחך הנגב/משונן?	Plantago chamaepsyllium/notata?					1		1		1+
SVT-26	Shivta	Tepper, Bar-Oz and Gini	Daniel Fuks	2016-2017	E	515	5103	Yes	3		2	חיטה	Triticum	גרגיר	grain	דגניים	Gramineae	2		2	2	2
SVT-26	Shivta	Tepper, Bar-Oz and Gini	Daniel Fuks	2016-2017	E	515	5103	Yes	3		3	חיטה/שעורה	Hordeum/Triticum	גרגיר	grain	דגניים	Gramineae	1		1	1	2
SVT-26	Shivta	Tepper, Bar-Oz and Gini	Daniel Fuks	2016-2017	E	515	5103	Yes	3		4			פרק גבעול	culm node	דגניים	Gramineae	12		12		1+
SVT-26	Shivta	Tepper, Bar-Oz and Gini	Daniel Fuks	2016-2017	E	515	5103	Yes	3		5			שורשים	roots	דגניים	Gramineae	3		3		1+
SVT-6	Shivta	Tepper, Bar-Oz and Gini	Daniel Fuks	2016-2017	E	501	5111	Yes	3		22	לחך הנגב/משונן?	Plantago chamaepsyllium/notata?	זרע	seed	לחכיים	Plantaginaceae	1		1		1+
SVT-7	Shivta	Tepper, Bar-Oz and Gini	Daniel Fuks	2016-2018	E	501	5118	Yes	3		30	שקד	Prunus amygdalus	קליפת גלעין	mesocarp	ורדניים	Rosaceae		1				2
SVT-5	Shivta	Tepper, Bar-Oz and Gini	Daniel Fuks	2016-2017	E	501	5110	Yes	3		31	רימון מצוי	Punica granatum	זרע	seed	רימוניים	Lyhtraceae	1	1	2	2	1+	2
SVT-7	Shivta	Tepper, Bar-Oz and Gini	Daniel Fuks	2016-2018	E	501	5118	Yes	3		22	רימון מצוי	Punica granatum	זרע	seed	רימוניים	Lyhtraceae	1	1	2	2	1+	2
SVT-4	Shivta	Tepper, Bar-Oz and Gini	Daniel Fuks	2016-2017	E	501	5102	Yes	3		242	שלח	Reboudia sp.	קשווה								0.5
SVT-26	Shivta	Tepper, Bar-Oz and Gini	Daniel Fuks	2016-2017	E	515	5103	Yes	3		11	אהל מצוי						1		1		1+
SVT-27	Shivta	Tepper, Bar-Oz and Gini	Daniel Fuks	2016-2017	E	516	5130	Yes	3		1	שעורה תרבותית??	Hordeum vulgare??	גרגיר	grain	דגניים	Gramineae	2		2		1+
SVT-27	Shivta	Tepper, Bar-Oz and Gini	Daniel Fuks	2016-2017	E	516	5130	Yes	3		2	חיטה	Triticum	גרגיר	grain	דגניים	Gramineae	12		12	12	2
SVT-3	Shivta	Tepper, Bar-Oz and Gini	Daniel Fuks	2016-2017	E	501	5097	Yes	3		59	רכפה	Reseda									1mm+			להגדרה
SVT-27	Shivta	Tepper, Bar-Oz and Gini	Daniel Fuks	2016-2017	E	516	5130	Yes	3		4			פרק גבעול	culm node	דגניים	Gramineae	3		3		1+
SVT-10	Shivta	Tepper, Bar-Oz and Gini	Daniel Fuks	2016-2018	E	503	5016	Yes	3		32	חומעה/ארכובית	Rumex/Polygonum	זרע	seed			2		2	2	1
SVT-27	Shivta	Tepper, Bar-Oz and Gini	Daniel Fuks	2016-2017	E	516	5130	Yes	3		6	קחוון?		קרקפת פורה	head	מורכבים	Asteraceae	1		1		1+
SVT-27	Shivta	Tepper, Bar-Oz and Gini	Daniel Fuks	2016-2017	E	516	5130	Yes	3		7	בלתי		שברי זרע	seed fragments	פרפרניים?	Fabaceae?					1+
SVT-1	Shivta	Tepper, Bar-Oz and Gini	Daniel Fuks	2016-2017	E	500	5003	Yes	3		34	יפרוק? חמד?	Salsoleae	פרקי גבעול	stem segments	סלקיים	Chenopodiaceae	2		2		1mm+
SVT-27	Shivta	Tepper, Bar-Oz and Gini	Daniel Fuks	2016-2017	E	516	5130	Yes	3		9	זכוכית										1+	2
SVT-12	Shivta	Tepper, Bar-Oz and Gini				503	5019				32	פרק סלקי	Salsoleae	פרקי גבעול	Tribe: Salsoleae			8		8	8
SVT-3	Shivta	Tepper, Bar-Oz and Gini	Daniel Fuks	2016-2017	E	501	5097	Yes	3	1	2	חיטה	Triticum	גרגיר	grain	דגניים	Gramineae	16	1	17	17	1mm+	2
SVT-3	Shivta	Tepper, Bar-Oz and Gini	Daniel Fuks	2016-2017	E	501	5097	Yes	3	1	3	חיטה	Triticum	גרגיר	grain	דגניים	Gramineae	5		5	5	1mm+			טיפוס אחר
SVT-10	Shivta	Tepper, Bar-Oz and Gini	Daniel Fuks	2016-2018	E	503	5016	Yes	3		34	זנב העקרב השיכני	Scorpiurus muricatus	זרע	seed			1		1	1	1
SVT-3	Shivta	Tepper, Bar-Oz and Gini	Daniel Fuks	2016-2017	E	501	5097	Yes	3	1	5	דגני להגדרה		גרגיר	grain	דגניים	Gramineae	9		9		1mm+			חיטה? בן חיטה?
SVT-3	Shivta	Tepper, Bar-Oz and Gini	Daniel Fuks	2016-2017	E	501	5097	Yes	3	1	6	דגני להגדרה		גרגיר	grain	דגניים	Gramineae	2		2		1mm+
SVT-3	Shivta	Tepper, Bar-Oz and Gini	Daniel Fuks	2016-2017	E	501	5097	Yes	3	1	7	דגני להגדרה		גרגיר	grain	דגניים	Gramineae	7		7		1mm+			ברומית? זון?
SVT-3	Shivta	Tepper, Bar-Oz and Gini	Daniel Fuks	2016-2017	E	501	5097	Yes	3	1	8	דגני להגדרה		גרגיר	grain	דגניים	Gramineae	6		6		1mm+			השתמרות גרועה
SVT-3	Shivta	Tepper, Bar-Oz and Gini	Daniel Fuks	2016-2017	E	501	5097	Yes	3	1	9	דגני להגדרה		גרגיר	grain	דגניים	Gramineae	4		4		1mm+			זון? ברומית?
SVT-3	Shivta	Tepper, Bar-Oz and Gini	Daniel Fuks	2016-2017	E	501	5097	Yes	3	1	10	דגני להגדרה		גרגיר	grain	דגניים	Gramineae	1		1		1mm+
SVT-3	Shivta	Tepper, Bar-Oz and Gini	Daniel Fuks	2016-2017	E	501	5097	Yes	3	1	11	דגני להגדרה		גרגיר	grain	דגניים	Gramineae	1		1		1mm+
SVT-3	Shivta	Tepper, Bar-Oz and Gini	Daniel Fuks	2016-2017	E	501	5097	Yes	3	1	12	דגני		גרגיר	grain	דגניים	Gramineae	3		3		1mm+
SVT-3	Shivta	Tepper, Bar-Oz and Gini	Daniel Fuks	2016-2017	E	501	5097	Yes	3	1	13			שברי גרגיר	grain fragments	דגניים	Gramineae					1mm+
SVT-3	Shivta	Tepper, Bar-Oz and Gini	Daniel Fuks	2016-2017	E	501	5097	Yes	3	2	35	זנב-העקרב השיכני	Scorpiurus muricatus	זרע	seed	פרפרניים	Fabaceae	5		5		1mm+
SVT-4	Shivta	Tepper, Bar-Oz and Gini	Daniel Fuks	2016-2017	E	501	5102	Yes	3	2	72	זנב העקרב השיכני	Scorpiurus muricatus	זרע	seed	פרפרניים	Fabaceae	1		1		1+			יש דומים לזנב-עקרב ב4-101
SVT-1	Shivta	Tepper, Bar-Oz and Gini	Daniel Fuks	2016-2017	E	500	5003	Yes	3		20	ציפורנית	Silene	זרע	seed	ציפורניים	Caryophyllaceae	1		1		1mm+			לוודא בסוף
SVT-4	Shivta	Tepper, Bar-Oz and Gini	Daniel Fuks	2016-2017	E	501	5102	Yes	3		199	ציפורנת מגוונת/מקופחת	Silene corolata/decipiens	זרע	seed	ציפורניים	Caryophyllaceae	4		4		0.5			דגם
SVT-3	Shivta	Tepper, Bar-Oz and Gini	Daniel Fuks	2016-2017	E	501	5097	Yes	3	1	18			חלקי שדרה	rachis fragments	דגניים	Gramineae	30		30		1mm+			למיין
SVT-3	Shivta	Tepper, Bar-Oz and Gini	Daniel Fuks	2016-2017	E	501	5097	Yes	3	1	19	חיטת הלחם?	Triticum aestivum?	חלק שדרה עליון	upper rachis node	דגניים	Gramineae	1		1		1mm+
SVT-3	Shivta	Tepper, Bar-Oz and Gini	Daniel Fuks	2016-2017	E	501	5097	Yes	3	1	20			חלקי שדרה	rachis fragments	דגניים	Gramineae	1		1		1mm+			מתוך גלל?
SVT-3	Shivta	Tepper, Bar-Oz and Gini	Daniel Fuks	2016-2017	E	501	5097	Yes	3	1	21			חלקי שדרה	rachis fragments	דגניים	Gramineae	כ-15		15		1mm+			לא להתעסק
SVT-3	Shivta	Tepper, Bar-Oz and Gini	Daniel Fuks	2016-2017	E	501	5097	Yes	3	1	22			בסיס ראכיס	rachis base	דגניים	Gramineae	3		3		1mm+
SVT-3	Shivta	Tepper, Bar-Oz and Gini	Daniel Fuks	2016-2017	E	501	5097	Yes	3	1	23	בלתי		חלקי שדרה?	rachis fragments?	דגניים	Gramineae	4		4		1mm+
SVT-3	Shivta	Tepper, Bar-Oz and Gini	Daniel Fuks	2016-2017	E	501	5097	Yes	3	1	24	להגדרה		שיבולית	spikelet	דגניים	Gramineae	1		1		1mm+			אודי: לבדוק שעורה
SVT-3	Shivta	Tepper, Bar-Oz and Gini	Daniel Fuks	2016-2017	E	501	5097	Yes	3	1	25			שברי מלען	awn fragments	דגניים	Gramineae					1mm+
SVT-3	Shivta	Tepper, Bar-Oz and Gini	Daniel Fuks	2016-2017	E	501	5097	Yes	3	1	26			פרקי גבעול	culm nodes	דגניים	Gramineae	34		34		1mm+
SVT-3	Shivta	Tepper, Bar-Oz and Gini	Daniel Fuks	2016-2017	E	501	5097	Yes	3	1	27			שורשי דגן	culm roots	דגניים	Gramineae	6		6		1mm+
SVT-3	Shivta	Tepper, Bar-Oz and Gini	Daniel Fuks	2016-2017	E	501	5097	Yes	3	1	28	דגני?										1mm+
SVT-3	Shivta	Tepper, Bar-Oz and Gini	Daniel Fuks	2016-2017	E	501	5097	Yes	3	1	29	דגני להגדרה		גרגיר	grain	דגניים	Gramineae	2		2		1mm+
SVT-3	Shivta	Tepper, Bar-Oz and Gini	Daniel Fuks	2016-2017	E	501	5097	Yes	3	1	30	דגני?		גרגיר	grain	דגניים	Gramineae	1		1		1mm+
SVT-3	Shivta	Tepper, Bar-Oz and Gini	Daniel Fuks	2016-2017	E	501	5097	Yes	3	1	31	שעורה?	Hordeum vulgare?	חלקי שדרה	rachis fragments	דגניים	Gramineae	1		1		1mm+
SVT-13	Shivta	Tepper, Bar-Oz and Gini				503	5039				48	ציפרנית	Silene sp.		Silene			2		2	2	<2			להגדרה
SVT-3	Shivta	Tepper, Bar-Oz and Gini	Daniel Fuks	2016-2017	E	501	5097	Yes	3	2	33	עדשה?	Lens culinaris?	זרע	seed	פרפרניים	Fabaceae	1		1		1mm+
SVT-13	Shivta	Tepper, Bar-Oz and Gini				503	5039				105	ציפורנית	Silene sp.	זרע	seed			1		1	1	<2
SVT-14	Shivta	Tepper, Bar-Oz and Gini	Daniel Fuks	2016-2018	E	504	5029	Yes	3		20	חציל תרבותי	Solanum melongena					3		3		1+					2של 1מ"מ
SVT-3	Shivta	Tepper, Bar-Oz and Gini	Daniel Fuks	2016-2017	E	501	5097	Yes	3	2	36	קדד? גרגרנית?		זרע	seed	פרפרניים	Fabaceae	1		1		1mm+
SVT-3	Shivta	Tepper, Bar-Oz and Gini	Daniel Fuks	2016-2017	E	501	5097	Yes	3	2	37	אספסת		זרע	seed	פרפרניים	Fabaceae	30		30		1mm+
SVT-3	Shivta	Tepper, Bar-Oz and Gini	Daniel Fuks	2016-2017	E	501	5097	Yes	3	2	38	אספסת?		זרע	seed	פרפרניים	Fabaceae	2		2		1mm+
SVT-3	Shivta	Tepper, Bar-Oz and Gini	Daniel Fuks	2016-2017	E	501	5097	Yes	3	2	39	אספסת?		זרע	seed	פרפרניים	Fabaceae	1		1		1mm+
SVT-3	Shivta	Tepper, Bar-Oz and Gini	Daniel Fuks	2016-2017	E	501	5097	Yes	3	2	40	קטרון?		זרע	seed	פרפרניים	Fabaceae	1		1		1mm+
SVT-3	Shivta	Tepper, Bar-Oz and Gini	Daniel Fuks	2016-2017	E	501	5097	Yes	3	2	41	פרפרני ליואל		זרע	seed	פרפרניים	Fabaceae	16		16		1mm+
SVT-3	Shivta	Tepper, Bar-Oz and Gini	Daniel Fuks	2016-2017	E	501	5097	Yes	3	2	42	פרפרני ליואל		זרע	seed	פרפרניים	Fabaceae	1		1		1mm+
SVT-3	Shivta	Tepper, Bar-Oz and Gini	Daniel Fuks	2016-2017	E	501	5097	Yes	3	2	43	פרפרני ליואל		זרע	seed	פרפרניים	Fabaceae	1		1		1mm+
SVT-3	Shivta	Tepper, Bar-Oz and Gini	Daniel Fuks	2016-2017	E	501	5097	Yes	3	2	44	פרפרני ליואל		זרע	seed	פרפרניים	Fabaceae	2		2		1mm+
SVT-3	Shivta	Tepper, Bar-Oz and Gini	Daniel Fuks	2016-2017	E	501	5097	Yes	3		45	בלתי		זרע	seed	פרפרניים?	Fabaceae?	8		8		1mm+			השתמרות גרועה
SVT-3	Shivta	Tepper, Bar-Oz and Gini	Daniel Fuks	2016-2017	E	501	5097	Yes	3		46	בלתי		זרע	seed	פרפרניים?	Fabaceae?					1mm+
SVT-3	Shivta	Tepper, Bar-Oz and Gini	Daniel Fuks	2016-2017	E	501	5097	Yes	3		47	חלמית	Malva	זרע	seed							1mm+
SVT-13	Shivta	Tepper, Bar-Oz and Gini				503	5039				74	אספרגולה	Spergula sp.					5		5	5	<2
SVT-11	Shivta	Tepper, Bar-Oz and Gini				503	5018				40	אשל הפרקים	Tamarix aphylla					2		2	2
SVT-3	Shivta	Tepper, Bar-Oz and Gini	Daniel Fuks	2016-2017	E	501	5097	Yes	3		50	בן-שלח?						1		1		1mm+
SVT-3	Shivta	Tepper, Bar-Oz and Gini	Daniel Fuks	2016-2017	E	501	5097	Yes	3		51	קרקפת מורכבים				מורכבים	Asteraceae	1		1		1mm+
SVT-3	Shivta	Tepper, Bar-Oz and Gini	Daniel Fuks	2016-2017	E	501	5097	Yes	3		52	זרעון מורכבים		זרעון	achene	מורכבים	Asteraceae	1		1		1mm+
SVT-3	Shivta	Tepper, Bar-Oz and Gini	Daniel Fuks	2016-2017	E	501	5097	Yes	3		53	ארכוביתי?										1mm+
SVT-12	Shivta	Tepper, Bar-Oz and Gini				503	5019				30	אשל הפרקים	Tamarix aphylla					2		2	2
SVT-3	Shivta	Tepper, Bar-Oz and Gini	Daniel Fuks	2016-2017	E	501	5097	Yes	3		55	לחך?										1mm+
SVT-3	Shivta	Tepper, Bar-Oz and Gini	Daniel Fuks	2016-2017	E	501	5097	Yes	3		56	יפרוק? חמד?										1mm+
SVT-3	Shivta	Tepper, Bar-Oz and Gini	Daniel Fuks	2016-2017	E	501	5097	Yes	3		57	כפיות שעירות										1mm+
SVT-13	Shivta	Tepper, Bar-Oz and Gini	Daniel Fuks	2016-2018	E	503	5039	Yes	3		24	אשל הפרקים	Tamarix aphylla					1		1		2
SVT-13	Shivta	Tepper, Bar-Oz and Gini				503	5039				81	אשל הפרקים - חלקים	Tamarix aphylla					24		24	24	<2
SVT-4	Shivta	Tepper, Bar-Oz and Gini	Daniel Fuks	2016-2017	E	501	5102	Yes	3		82	אשל הפרקים	Tamarix aphylla	פרק	segment	אשליים	Tamaricaceae	2	?1	2		1+	2		הארוך מheavy fraction
SVT-1	Shivta	Tepper, Bar-Oz and Gini	Daniel Fuks	2016-2017	E	500	5003	Yes	3		52	מתנן שעיר	Thymelaea hirsuta	פרי	fruit	מתנניים	Thymelaeaceae	2		2		1mm+
SVT-3	Shivta	Tepper, Bar-Oz and Gini	Daniel Fuks	2016-2017	E	501	5097	Yes	3		62	בלתי										1mm+
SVT-3	Shivta	Tepper, Bar-Oz and Gini	Daniel Fuks	2016-2017	E	501	5097	Yes	3		63	בלתי										1mm+
SVT-3	Shivta	Tepper, Bar-Oz and Gini	Daniel Fuks	2016-2017	E	501	5097	Yes	3		64	בלתי										1mm+
SVT-3	Shivta	Tepper, Bar-Oz and Gini	Daniel Fuks	2016-2017	E	501	5097	Yes	3		65	בלתי										1mm+
SVT-3	Shivta	Tepper, Bar-Oz and Gini	Daniel Fuks	2016-2017	E	501	5097	Yes	3		66	בלתי										1mm+
SVT-3	Shivta	Tepper, Bar-Oz and Gini	Daniel Fuks	2016-2017	E	501	5097	Yes	3		67	בלתי										1mm+
SVT-3	Shivta	Tepper, Bar-Oz and Gini	Daniel Fuks	2016-2017	E	501	5097	Yes	3		68	בלתי										1mm+
SVT-3	Shivta	Tepper, Bar-Oz and Gini	Daniel Fuks	2016-2017	E	501	5097	Yes	3		69	בלתי										1mm+
SVT-3	Shivta	Tepper, Bar-Oz and Gini	Daniel Fuks	2016-2017	E	501	5097	Yes	3		70	בלתי										1mm+
SVT-3	Shivta	Tepper, Bar-Oz and Gini	Daniel Fuks	2016-2017	E	501	5097	Yes	3		71	בלתי										1mm+			לבדוק אשל
SVT-3	Shivta	Tepper, Bar-Oz and Gini	Daniel Fuks	2016-2017	E	501	5097	Yes	3		72	תמר??		שבר	fragment							1mm+
SVT-3	Shivta	Tepper, Bar-Oz and Gini	Daniel Fuks	2016-2017	E	501	5097	Yes	3		73	בלתי-שונות										1mm+	2
SVT-3	Shivta	Tepper, Bar-Oz and Gini	Daniel Fuks	2016-2017	E	501	5097	Yes	3		74	גללים										1mm+	2
SVT-3	Shivta	Tepper, Bar-Oz and Gini	Daniel Fuks	2016-2017	E	501	5097	Yes	3		75	גלל מכרסם?										1mm+
SVT-3	Shivta	Tepper, Bar-Oz and Gini	Daniel Fuks	2016-2017	E	501	5097	Yes	3		76	זית		שבר גלעין					1	1			2
SVT-3	Shivta	Tepper, Bar-Oz and Gini	Daniel Fuks	2016-2017	E	501	5097	Yes	3		77	שקד?		שבר גלעין	mesocarp	ורדניים?	Rosaceae		1	1			2
SVT-1	Shivta	Tepper, Bar-Oz and Gini	Daniel Fuks	2016-2017	E	500	5003	Yes	3		53	מתנן שעיר	Thymelaea hirsuta	עלה	leaf	מתנניים	Thymelaeaceae	4		4		1mm+
SVT-10	Shivta	Tepper, Bar-Oz and Gini	Daniel Fuks	2016-2018	E	503	5016	Yes	3		38	מתנן שעיר	Thymelaea hirsuta	עלה	leaf			2		2	2	1
SVT-10	Shivta	Tepper, Bar-Oz and Gini	Daniel Fuks	2016-2018	E	503	5016	Yes	3		39	מתנן שעיר	Thymelaea hirsuta	אגוזית	nutlet			2		2	2	1
SVT-11	Shivta	Tepper, Bar-Oz and Gini				503	5018				23	מתנן שעיר	Thymelaea hirsuta	עלה	Thymelaea hirsuta			3		3	3
SVT-13	Shivta	Tepper, Bar-Oz and Gini	Daniel Fuks	2016-2018	E	503	5039	Yes	3		20	מתנן שעיר	Thymelaea hirsuta	עלה		מתנניים	Thymelaeaceae	1		1		2			לא מפוחם
SVT-13	Shivta	Tepper, Bar-Oz and Gini				503	5039				84	מתנן שעיר	Thymelaea hirsuta	עלה	leaf			25		25	25	<2
SVT-13	Shivta	Tepper, Bar-Oz and Gini				503	5039				85	מתנן שעיר	Thymelaea hirsuta	ניצן	bud			8		8	8	<2
SVT-14	Shivta	Tepper, Bar-Oz and Gini	Daniel Fuks	2016-2018	E	504	5029	Yes	3		21	מתנן שעיר	Thymelaea hirsuta	עלה	leaf	מתנניים	Thymelaeaceae	2		2		1+			אחד מפוחם אחד לא
SVT-140	Shivta	Tepper, Bar-Oz and Gini	Daniel Fuks	2016-2017	E	504	5029	No	3		63	מתנן שעיר	Thymelaea hirsuta	אגוזית	nutlet					4	4			1
SVT-140	Shivta	Tepper, Bar-Oz and Gini	Daniel Fuks	2016-2017	E	504	5029	No	3		64	מתנן שעיר	Thymelaea hirsuta	עלה	leaf					16	16			1	אחד לא מפוחם
SVT-2	Shivta	Tepper, Bar-Oz and Gini	Daniel Fuks	2016-2017	E	501	5006	Yes	3	5	31	מתנן שעיר	Thymelaea hirsuta	עלה	leaf	מתנניים	Thymelaeaceae					1mm+
SVT-3	Shivta	Tepper, Bar-Oz and Gini	Daniel Fuks	2016-2017	E	501	5097	Yes	3		48	מתנן שעיר	Thymelaea hirsuta	עלה	leaf	מתנניים	Thymelaeaceae	4		4		1mm+
SVT-3	Shivta	Tepper, Bar-Oz and Gini	Daniel Fuks	2016-2017	E	501	5097	Yes	3		49	מתנן שעיר	Thymelaea hirsuta	ניצן	bud?	מתנניים	Thymelaeaceae					1mm+
SVT-4	Shivta	Tepper, Bar-Oz and Gini	Daniel Fuks	2016-2017	E	501	5102	Yes	3		78	מתנן שעיר	Thymelaea hirsuta	פרי	fruit	מתנניים	Thymelaeaceae	1		1		1+
SVT-4	Shivta	Tepper, Bar-Oz and Gini	Daniel Fuks	2016-2017	E	501	5102	Yes	3		79	מתנן שעיר	Thymelaea hirsuta	עלה	leaf	מתנניים	Thymelaeaceae	24		24		1+
SVT-4	Shivta	Tepper, Bar-Oz and Gini	Daniel Fuks	2016-2017	E	501	5102	Yes	3		195	מתנן שעיר	Thymelaea hirsuta	עלה	leaf	מתנניים	Thymelaeaceae	21		21		0.5					1של 1מ"מ
SVT-8	Shivta	Tepper, Bar-Oz and Gini	Daniel Fuks	2016-2018	E	502	5010	Yes	3		12	מתנן שעיר	Thymelaea hirsuta	עלה	leaf	מתנניים	Thymelaeaceae	15		15		0.3+
SVT-9	Shivta	Tepper, Bar-Oz and Gini	Daniel Fuks	2016-2018	E	502	5014	Yes	3		11	מתנן שעיר	Thymelaea hirsuta	עלה	leaf	מתנניים	Thymelaeaceae	2		2		1+
SVT-10	Shivta	Tepper, Bar-Oz and Gini	Daniel Fuks	2016-2018	E	503	5016	Yes	3		10	פרק סלקי	Tribe: Salsoleae	פרקי גבעול	stem segments	סלקיים	Chenopodiaceae	1		1		1+
SVT-4	Shivta	Tepper, Bar-Oz and Gini	Daniel Fuks	2016-2017	E	501	5102	Yes	3	1	22	טיפוס של ברומית	Bromus type	גרגיר	grain	דגניים	Gramineae	1		1		1mm+			נראה כמתחבר ל-4-151 מהפרקציה הקטנה אבל יואל לא בטוח וקשה להבין מה הסיפור בעובר שלו...
SVT-4	Shivta	Tepper, Bar-Oz and Gini	Daniel Fuks	2016-2017	E	501	5102	Yes	3	1	151	טיפוס של ברומית	Bromus type	גרגיר	grain	דגניים	Gramineae	3		3		0.5			צר וארוך מאד
SVT-10	Shivta	Tepper, Bar-Oz and Gini	Daniel Fuks	2016-2018	E	503	5016	Yes	3		36	פרק סלקי	Tribe: Salsoleae	פרקי גבעול	stem segments			6		6	6	1
SVT-13	Shivta	Tepper, Bar-Oz and Gini	Daniel Fuks	2016-2018	E	503	5039	Yes	3		19	פרק סלקי	Tribe: Salsoleae	פרקי גבעול		סלקיים	Chenopodiaceae	1		1		2
SVT-14	Shivta	Tepper, Bar-Oz and Gini	Daniel Fuks	2016-2018	E	504	5029	Yes	3		22	פרק סלקי	Tribe: Salsoleae	פרקי גבעול	stem segments	סלקיים	Chenopodiaceae	9		9		1+
SVT-140	Shivta	Tepper, Bar-Oz and Gini	Daniel Fuks	2016-2017	E	504	5029	No	3		16	פרק סלקי	Tribe: Salsoleae	פרקי גבעול	stem segments	סלקיים	Chenopodiaceae			11	11			2	each fragment contains several segments, for most
SVT-140	Shivta	Tepper, Bar-Oz and Gini	Daniel Fuks	2016-2017	E	504	5029	No	3		72	פרק סלקי	Tribe: Salsoleae	פרקי גבעול	stem segments	סלקיים	Chenopodiaceae			16	16			1
SVT-15	Shivta	Tepper, Bar-Oz and Gini	Daniel Fuks	2016-2017	E	505	5031	Yes	3		15	פרק סלקי	Tribe: Salsoleae	פרקי גבעול	stem segments	סלקיים	Chenopodiaceae	28		28		1+
SVT-16	Shivta	Tepper, Bar-Oz and Gini	Daniel Fuks	2016-2017	E	505	5037	Yes	3		22	פרק סלקי	Tribe: Salsoleae	פרקי גבעול	stem segments	סלקיים	Chenopodiaceae	3		3		1+
SVT-19	Shivta	Tepper, Bar-Oz and Gini	Daniel Fuks	2016-2017	E	507	5045	Yes	1.5		10	פרק סלקי	Tribe: Salsoleae	פרקי גבעול	stem segments	סלקיים	Chenopodiaceae	1		1		1+
SVT-4	Shivta	Tepper, Bar-Oz and Gini	Daniel Fuks	2016-2017	E	501	5102	Yes	3		254	גללי צאן	dung	גלל	dung pellets								2
SVT-24	Shivta	Tepper, Bar-Oz and Gini	Daniel Fuks	2016-2017	E	514	5084	Yes	3		2	פרק סלקי	Tribe: Salsoleae	פרקי גבעול	stem segments	סלקיים	Chenopodiaceae	1		1		1+
SVT-26	Shivta	Tepper, Bar-Oz and Gini	Daniel Fuks	2016-2017	E	515	5103	Yes	3		10	פרק סלקי	Tribe: Salsoleae	פרקי גבעול	stem segments	סלקיים	Chenopodiaceae	1		1		1+
SVT-4	Shivta	Tepper, Bar-Oz and Gini	Daniel Fuks	2016-2017	E	501	5102	Yes	3		93	Tribe: Salsoleae	Tribe: Salsoleae	פרקי גבעול	stem segments	סלקיים	Chenopodiaceae					1+
SVT-5	Shivta	Tepper, Bar-Oz and Gini	Daniel Fuks	2016-2017	E	501	5110	Yes	3		27	Tribe: Salsoleae	Tribe: Salsoleae	פרקי גבעול	stem segments	סלקיים	Chenopodiaceae	5		5		1+			להגדרה
SVT-6	Shivta	Tepper, Bar-Oz and Gini	Daniel Fuks	2016-2017	E	501	5111	Yes	3		19	Tribe: Salsoleae	Tribe: Salsoleae	פרקי גבעול	stem segments	סלקיים	Chenopodiaceae	2		2		1+
SVT-7	Shivta	Tepper, Bar-Oz and Gini	Daniel Fuks	2016-2018	E	501	5118	Yes	3		20	Tribe: Salsoleae	Tribe: Salsoleae	פרקי גבעול	stem segments	סלקיים	Chenopodiaceae	2		2		1+
SVT-8	Shivta	Tepper, Bar-Oz and Gini	Daniel Fuks	2016-2018	E	502	5010	Yes	3		14	Tribe: Salsoleae	Tribe: Salsoleae	פרקי גבעול	stem segments	סלקיים	Chenopodiaceae	1		1		0.3+
SVT-4	Shivta	Tepper, Bar-Oz and Gini	Daniel Fuks	2016-2017	E	501	5102	Yes	3		244	תלתן	Trifolium sp.	זרע	seed	פרפרניים	Fabaceae	1		1		0.5
SVT-12	Shivta	Tepper, Bar-Oz and Gini				503	5019				29	גרגרנית ערבית	Trigonella arabica					7		7	7
SVT-4	Shivta	Tepper, Bar-Oz and Gini	Daniel Fuks	2016-2017	E	501	5102	Yes	3	2	69	גרגרנית ערבית	Trigonella arabica	זרע	seed	פרפרניים	Fabaceae	20		20		1+
SVT-10	Shivta	Tepper, Bar-Oz and Gini	Daniel Fuks	2016-2018	E	503	5016	Yes	3		24	גרגרנית החילבה	Trigonella foenum-graecum	זרע	seed			1		1	1	1
SVT-13	Shivta	Tepper, Bar-Oz and Gini	Daniel Fuks	2016-2018	E	503	5039	Yes	3		9	חיטת הלחם	Triticum aestivum	חלקי שדרה		דגניים	Gramineae	9		9		2			Includes 1 pieces with 3 segments, 1 piece with 2 segments, 7 pieces with 1 segment
SVT-4	Shivta	Tepper, Bar-Oz and Gini	Daniel Fuks	2016-2017	E	501	5102	Yes	3	1	29	שעורה?	Hordeum sp.?	פרק ציר שיבולת בלי מפרק	rachis fragments	דגניים	Gramineae	3		3		1mm+
SVT-14	Shivta	Tepper, Bar-Oz and Gini	Daniel Fuks	2016-2018	E	504	5029	Yes	3		8	חיטת הלחם	Triticum aestivum	חלקי שדרה	rachis segment	דגניים	Gramineae	5		5		1+			Includes 1 piece with 4 segments, 1 piece with 2 segments, 3 pieces with 1 segment
SVT-4	Shivta	Tepper, Bar-Oz and Gini	Daniel Fuks	2016-2017	E	501	5102	Yes	3	1	2	cf. שעורה	Hordeum vulgare cf.	גרגיר	grain	דגניים	Gramineae	10	1	10		1mm+	2		אולי שיבולת שועל ואולי אחרים
SVT-4	Shivta	Tepper, Bar-Oz and Gini	Daniel Fuks	2016-2017	E	501	5102	Yes	3	1	43	שעורה דו-טורית?	Hordeum vulgare disticum?	פרק ציר שיבולת מגלל	rachis fragments from dung pellets	דגניים	Gramineae	1		1		1mm+
SVT-4	Shivta	Tepper, Bar-Oz and Gini	Daniel Fuks	2016-2017	E	501	5102	Yes	3	1	27	שעורה שש-טורית?	Hordeum vulgare hexastichum?	פרק ציר שיבולת	rachis fragments	דגניים	Gramineae	4		4		1mm+
SVT-4	Shivta	Tepper, Bar-Oz and Gini	Daniel Fuks	2016-2017	E	501	5102	Yes	3	1	42	שעורה שש-טורית?	Hordeum vulgare hexastichum?	פרק ציר שיבולת מגלל	rachis fragments from dung pellets	דגניים	Gramineae	1		1		1mm+
SVT-140	Shivta	Tepper, Bar-Oz and Gini	Daniel Fuks	2016-2017	E	504	5029	No	3		8	חיטת הלחם	Triticum aestivum	פרק ציר שיבולת	rachis fragments	דגניים	Gramineae			3	3			2	2 pieces with 2 segments each
SVT-140	Shivta	Tepper, Bar-Oz and Gini	Daniel Fuks	2016-2017	E	504	5029	No	3		28	חיטת הלחם	Triticum aestivum	פרק ציר שיבולת	rachis fragments	דגניים	Gramineae			106	106			1	includes 6 pieces with 2 segments each and 2 with 2
SVT-4	Shivta	Tepper, Bar-Oz and Gini	Daniel Fuks	2016-2017	E	501	5102	Yes	3	1	38	שעורה?	Hordeum vulgare?	בסיס ראכיס	rachis base	דגניים	Gramineae	3		3		1mm+
SVT-4	Shivta	Tepper, Bar-Oz and Gini	Daniel Fuks	2016-2017	E	501	5102	Yes	3	1	13	חיטה/שעורה	Hordeum/Triticum	גרגיר	grain	דגניים	Gramineae	14	2	16	16	1mm+	2
SVT-4	Shivta	Tepper, Bar-Oz and Gini	Daniel Fuks	2016-2017	E	501	5102	Yes	3	1	35	חיטה/שעורה	Hordeum/Triticum	פרק ציר שיבולת	rachis fragments	דגניים	Gramineae	15		15		1mm+
SVT-4	Shivta	Tepper, Bar-Oz and Gini	Daniel Fuks	2016-2017	E	501	5102	Yes	3	1	36	חיטה/שעורה	Hordeum/Triticum	פרק ציר שיבולת בלי מפרק	rachis fragments	דגניים	Gramineae	23		23		1mm+
SVT-4	Shivta	Tepper, Bar-Oz and Gini	Daniel Fuks	2016-2017	E	501	5102	Yes	3	1	37	חיטה/שעורה	Hordeum/Triticum	פרק ציר שיבולת ראשוני	1st rachis segment	דגניים	Gramineae	4		4		1mm+
SVT-4	Shivta	Tepper, Bar-Oz and Gini	Daniel Fuks	2016-2017	E	501	5102	Yes	3	1	46	חיטה/שעורה	Hordeum/Triticum	פרק ציר שיבולת מגלל	rachis fragments from dung pellets	דגניים	Gramineae	11		11		1mm+
SVT-15	Shivta	Tepper, Bar-Oz and Gini	Daniel Fuks	2016-2017	E	505	5031	Yes	3		10	חיטת הלחם	Triticum aestivum	חלקי שדרה	rachis segment	דגניים	Gramineae	4		4		1+			Includes 1 piece with 3 segments, 1 pieces with 2 segments, 2 pieces with 1 segment
SVT-16	Shivta	Tepper, Bar-Oz and Gini	Daniel Fuks	2016-2017	E	505	5037	Yes	3		10	חיטת הלחם	Triticum aestivum	חלקי שדרה	rachis segment	דגניים	Gramineae	2		2		1+			Includes 1 piece with 4 segments, 1 piece with 1 segment
SVT-2	Shivta	Tepper, Bar-Oz and Gini	Daniel Fuks	2016-2017	E	501	5006	Yes	3	1	9	חיטת הלחם	Triticum aestivum	חלקי שדרה	rachis fragments	דגניים	Gramineae	15		15		1mm+
SVT-4	Shivta	Tepper, Bar-Oz and Gini	Daniel Fuks	2016-2017	E	501	5102	Yes	3		245	זון אשון	Lolium rigidum	גרגיר	grain	דגניים	Gramineae	1		1		1			גדול מדיי לזון רב-שנתי
SVT-26	Shivta	Tepper, Bar-Oz and Gini	Daniel Fuks	2016-2017	E	515	5103	Yes	3		8	חיטת הלחם	Triticum aestivum	חלקי שדרה	rachis segment	דגניים	Gramineae	3		3		1+			Includes 1 piece with 3 segments, 2 pieces with 2 segments
SVT-4	Shivta	Tepper, Bar-Oz and Gini	Daniel Fuks	2016-2017	E	501	5102	Yes	3	1	16	זון	Lolium sp.	גרגיר	grain	דגניים	Gramineae	1		1		1mm+			Not Lolium temulentum
SVT-27	Shivta	Tepper, Bar-Oz and Gini	Daniel Fuks	2016-2017	E	516	5130	Yes	3		5	חיטת הלחם	Triticum aestivum	חלקי שדרה	rachis segment	דגניים	Gramineae	1		1		1+
SVT-4	Shivta	Tepper, Bar-Oz and Gini	Daniel Fuks	2016-2017	E	501	5102	Yes	3		85	חלמית	Malva	קליפת פרודה		חלמיתיים	Malvaceae	2		2		1+			לא מפוחם
SVT-3	Shivta	Tepper, Bar-Oz and Gini	Daniel Fuks	2016-2017	E	501	5097	Yes	3	1	14	חיטת הלחם	Triticum aestivum	חלקי שדרה	rachis fragments	דגניים	Gramineae	19		19		1mm+
SVT-4	Shivta	Tepper, Bar-Oz and Gini	Daniel Fuks	2016-2017	E	501	5102	Yes	3	1	30	חיטת הלחם	Triticum aestivum	פרק ציר שיבולת	rachis fragments	דגניים	Gramineae	67		67		1mm+			1רביעה, 4כפולים=73 מפרקים		5של 1מ"מ
SVT-5	Shivta	Tepper, Bar-Oz and Gini	Daniel Fuks	2016-2017	E	501	5110	Yes	3		13	חיטת הלחם	Triticum aestivum	חלקי שדרה	rachis segment	דגניים	Gramineae	15		15		1+			includes 4 pieces with 3 segments each; 4 with 2 segments each and 7 with one segment each		2של 1מ"מ
SVT-6	Shivta	Tepper, Bar-Oz and Gini	Daniel Fuks	2016-2017	E	501	5111	Yes	3		7	חיטת הלחם	Triticum aestivum	חלקי שדרה	rachis segment	דגניים	Gramineae	8		8		1+			Includes 1 piece with 4 segments. 1 with 3, 3 with 2 and 3 with 1
SVT-7	Shivta	Tepper, Bar-Oz and Gini	Daniel Fuks	2016-2018	E	501	5118	Yes	3		10	חיטת הלחם	Triticum aestivum	חלקי שדרה	rachis segment	דגניים	Gramineae	7	3	7		1+			Includes 1 piece with 4 segments, 3 pieces with 3 segments each, and 3 pieces with 2 segments each, Heavy F: 3 pieces with 1 segment
SVT-8	Shivta	Tepper, Bar-Oz and Gini	Daniel Fuks	2016-2018	E	502	5010	Yes	3		2	חיטת הלחם	Triticum aestivum	חלקי שדרה	rachis segment	דגניים	Gramineae	1		1		0.3+
SVT-9	Shivta	Tepper, Bar-Oz and Gini	Daniel Fuks	2016-2018	E	502	5014	Yes	3		8	חיטת הלחם	Triticum aestivum	חלקי שדרה	rachis segment	דגניים	Gramineae	2		2		1+
SVT-4	Shivta	Tepper, Bar-Oz and Gini	Daniel Fuks	2016-2017	E	501	5102	Yes	3	1	163	חיטה cf.	Triticum cf.	פרק ציר שיבולת	rachis fragments	דגניים	Gramineae	1		1		0.5			יואל רואה בו מזלג דומה לחיטה. לא מתחבר לחיטה של 4-30
SVT-13	Shivta	Tepper, Bar-Oz and Gini	Daniel Fuks	2016-2018	E	503	5039	Yes	3		8	חיטה טטרפלוידית	Triticum durum/turgidum/parvicoccum	חלקי שדרה		דגניים	Gramineae	1		1		2			3 segments on one piece
SVT-14	Shivta	Tepper, Bar-Oz and Gini	Daniel Fuks	2016-2018	E	504	5029	Yes	3		7	חיטה טטרפלוידית	Triticum durum/turgidum/parvicoccum	חלקי שדרה	rachis segment	דגניים	Gramineae	4		4		1+			Includes 1 piece with 3 segments, 1 piece with 2 segments, 2 pieces with 1 segment
SVT-140	Shivta	Tepper, Bar-Oz and Gini	Daniel Fuks	2016-2017	E	504	5029	No	3		9	חיטה טטרפלוידית	Triticum durum/turgidum/parvicoccum	פרק ציר שיבולת	rachis fragments	דגניים	Gramineae			4	4			2	2 pieces with 2 segments each, 2 with 3 segments each
SVT-16	Shivta	Tepper, Bar-Oz and Gini	Daniel Fuks	2016-2017	E	505	5037	Yes	3		9	חיטה טטרפלוידית	Triticum durum/turgidum/parvicoccum	חלקי שדרה	rachis segment	דגניים	Gramineae	2		2		1+			Includes 1 piece with 1 segment, 1 piece with 2 segments
SVT-19	Shivta	Tepper, Bar-Oz and Gini	Daniel Fuks	2016-2017	E	507	5045	Yes	1.5		6	חיטה טטרפלוידית	Triticum durum/turgidum/parvicoccum	חלקי שדרה	rachis segment	דגניים	Gramineae	1		1		1+
SVT-2	Shivta	Tepper, Bar-Oz and Gini	Daniel Fuks	2016-2017	E	501	5006	Yes	3	1	10	חיטה טטרפלוידית	Triticum durum/turgidum/parvicoccum	חלקי שדרה	rachis fragments	דגניים	Gramineae	4		4		1mm+
SVT-26	Shivta	Tepper, Bar-Oz and Gini	Daniel Fuks	2016-2017	E	515	5103	Yes	3		7	חיטה טטרפלוידית	Triticum durum/turgidum/parvicoccum	חלקי שדרה	rachis segment	דגניים	Gramineae	1		1		1+
SVT-3	Shivta	Tepper, Bar-Oz and Gini	Daniel Fuks	2016-2017	E	501	5097	Yes	3	1	15	חיטה טטרפלוידית	Triticum durum/turgidum/parvicoccum	חלקי שדרה	rachis fragments	דגניים	Gramineae	6		6		1mm+
SVT-5	Shivta	Tepper, Bar-Oz and Gini	Daniel Fuks	2016-2017	E	501	5110	Yes	3		12	חיטה טטרפלוידית	Triticum durum/turgidum/parvicoccum	חלקי שדרה	rachis segment	דגניים	Gramineae	1		1		1+
SVT-7	Shivta	Tepper, Bar-Oz and Gini	Daniel Fuks	2016-2018	E	501	5118	Yes	3		9	חיטה טטרפלוידית	Triticum durum/turgidum/parvicoccum	חלקי שדרה	rachis segment	דגניים	Gramineae	3	2	3		1+			Includes 1 pieces with 3 segments amd 2 pieces with 2 segments each, Heavy F: 2 pieces with 1 segment
SVT-9	Shivta	Tepper, Bar-Oz and Gini	Daniel Fuks	2016-2018	E	502	5014	Yes	3		7	חיטה טטרפלוידית	Triticum durum/turgidum/parvicoccum	חלקי שדרה	rachis segment	דגניים	Gramineae	3		3		1+
SVT-4	Shivta	Tepper, Bar-Oz and Gini	Daniel Fuks	2016-2017	E	501	5102	Yes	3		80	מתנן שעיר?	Thymelaea hirsuta?	ניצן	bud	מתנניים?	Thymelaeaceae?	2		2		1+
SVT-4	Shivta	Tepper, Bar-Oz and Gini	Daniel Fuks	2016-2017	E	501	5102	Yes	3	1	44	?חיטה טטרפלוידית	Triticum durum/turgidum/parvicoccum?	פרק ציר שיבולת מגלל	rachis fragments from dung pellets	דגניים	Gramineae	1		1		1mm+
SVT-4	Shivta	Tepper, Bar-Oz and Gini	Daniel Fuks	2016-2017	E	501	5102	Yes	3		103	cf. תלתן	Trifolium cf.	זרע	seed	פרפרניים	Fabaceae	1		1		1+			יואל: לא להגדרה (להשאיר לסוף)
SVT-4	Shivta	Tepper, Bar-Oz and Gini	Daniel Fuks	2016-2017	E	501	5102	Yes	3	1	4	חיטה	Triticum parvicoccum cf.	גרגיר	grain	דגניים	Gramineae	7		7	7	2			טיפוס 2
SVT-4	Shivta	Tepper, Bar-Oz and Gini	Daniel Fuks	2016-2017	E	501	5102	Yes	3	1	5	חיטה	Triticum parvicoccum cf.	גרגיר	grain	דגניים	Gramineae	9		9	9	1mm+
SVT-4	Shivta	Tepper, Bar-Oz and Gini	Daniel Fuks	2016-2017	E	501	5102	Yes	3	1	33	חיטה	Triticum	פרק ציר שיבולת	rachis fragments	דגניים	Gramineae	16		16		1mm+
SVT-4	Shivta	Tepper, Bar-Oz and Gini	Daniel Fuks	2016-2017	E	501	5102	Yes	3	1	34	חיטה	Triticum	פרק ציר שיבולת צלקת נקיה	rachis fragments	דגניים	Gramineae	1		1		1mm+
SVT-4	Shivta	Tepper, Bar-Oz and Gini	Daniel Fuks	2016-2017	E	501	5102	Yes	3	1	6	חיטה	Triticum parvicoccum cf.	גרגיר	grain	דגניים	Gramineae	7		7	7	2
SVT-4	Shivta	Tepper, Bar-Oz and Gini	Daniel Fuks	2016-2017	E	501	5102	Yes	3	1	32	חיטת הלחם?	Triticum aestivum?	פרק ציר שיבולת בלי מפרק	rachis fragments	דגניים	Gramineae	9		9		1mm+
SVT-4	Shivta	Tepper, Bar-Oz and Gini	Daniel Fuks	2016-2017	E	501	5102	Yes	3	1	7	חיטה	Triticum parvicoccum cf.	גרגיר	grain	דגניים	Gramineae	3		3	3	1			טיפוס 3
SVT-4	Shivta	Tepper, Bar-Oz and Gini	Daniel Fuks	2016-2017	E	501	5102	Yes	3	1	8	חיטה	Triticum parvicoccum cf.	גרגיר	grain	דגניים	Gramineae	8		8	8	1
SVT-4	Shivta	Tepper, Bar-Oz and Gini	Daniel Fuks	2016-2017	E	501	5102	Yes	3	1	9	חיטה	Triticum parvicoccum cf.	גרגיר	grain	דגניים	Gramineae	5		5	5	1
SVT-4	Shivta	Tepper, Bar-Oz and Gini	Daniel Fuks	2016-2017	E	501	5102	Yes	3	1	10	חיטה	Triticum parvicoccum cf.	גרגיר	grain	דגניים	Gramineae	2		2	2	1
SVT-4	Shivta	Tepper, Bar-Oz and Gini	Daniel Fuks	2016-2017	E	501	5102	Yes	3	1	11	חיטה	Triticum parvicoccum cf.	גרגיר	grain	דגניים	Gramineae	4		4	4	1			טיפוס 4
SVT-10	Shivta	Tepper, Bar-Oz and Gini	Daniel Fuks	2016-2018	E	503	5016	Yes	3		2	חיטה	Triticum sp.	גרגיר	grain	דגניים	Gramineae	8	1	8	9	2	2
SVT-10	Shivta	Tepper, Bar-Oz and Gini	Daniel Fuks	2016-2018	E	503	5016	Yes	3		21	חיטה	Triticum sp.	גרגיר	grain			2		2	2	1
SVT-11	Shivta	Tepper, Bar-Oz and Gini	Daniel Fuks	2016-2018	E	503	5018	Yes	3		2	חיטה	Triticum sp.	גרגיר	Triticum sp.	דגניים	Gramineae	15	2	17	17	2	2
SVT-11	Shivta	Tepper, Bar-Oz and Gini				503	5018				19	חיטה	Triticum sp.	גרגיר				7		7	7
SVT-12	Shivta	Tepper, Bar-Oz and Gini	Daniel Fuks	2016-2018	E	503	5019	Yes	3		2	חיטה	Triticum sp.	גרגיר	Triticum sp.	דגניים	Gramineae	8	2	10	10	2	2
SVT-12	Shivta	Tepper, Bar-Oz and Gini				503	5019				19	חיטה	Triticum sp.					5		5	5
SVT-13	Shivta	Tepper, Bar-Oz and Gini	Daniel Fuks	2016-2018	E	503	5039	Yes	3		2	חיטה	Triticum sp.	גרגיר	Triticum sp.	דגניים	Gramineae	26	1	27	27	2	2
SVT-4	Shivta	Tepper, Bar-Oz and Gini	Daniel Fuks	2016-2017	E	501	5102	Yes	3	1	39	חיטה?	Triticum?	בסיס ראכיס	rachis base	דגניים	Gramineae	2		2		1mm+
SVT-4	Shivta	Tepper, Bar-Oz and Gini	Daniel Fuks	2016-2017	E	501	5102	Yes	3	1	45	חיטה?	Triticum?	פרק ציר שיבולת מגלל	rachis fragments from dung pellets	דגניים	Gramineae	1		1		1mm+
SVT-4	Shivta	Tepper, Bar-Oz and Gini	Daniel Fuks	2016-2017	E	501	5102	Yes	3	1	146	חיטה?	Triticum?	גרגיר	grain	דגניים	Gramineae	2	לחבר 146-148?	2		0.5			השווה 1מ"מ לעיל
SVT-4	Shivta	Tepper, Bar-Oz and Gini	Daniel Fuks	2016-2017	E	501	5102	Yes	3	1	147	חיטה?	Triticum?	גרגיר	grain	דגניים	Gramineae	3		3		0.5
SVT-4	Shivta	Tepper, Bar-Oz and Gini	Daniel Fuks	2016-2017	E	501	5102	Yes	3	1	148	חיטה?	Triticum?	גרגיר	grain	דגניים	Gramineae	3		3		0.5
SVT-4	Shivta	Tepper, Bar-Oz and Gini	Daniel Fuks	2016-2017	E	501	5102	Yes	3		186	חיטה?	Triticum?	פרק ציר שיבולת	rachis fragments	דגניים	Gramineae	1		1		0.5
SVT-4	Shivta	Tepper, Bar-Oz and Gini	Daniel Fuks	2016-2017	E	501	5102	Yes	3		95	בלתי	UNIDENTIFIED	גרגיר	grain	דגניים	Gramineae	2		2		1+			עמ' 337 מחברת1. מגינית מתאימה ל-שיבולת שועל
SVT-4	Shivta	Tepper, Bar-Oz and Gini	Daniel Fuks	2016-2017	E	501	5102	Yes	3		96	בלתי	UNIDENTIFIED					1		1		1+			אם יהיו עוד אפשר לחבר ולנסות להגדיר לכף אווז ריחני, אוכם, ירבוז ואולי אחרים
SVT-4	Shivta	Tepper, Bar-Oz and Gini	Daniel Fuks	2016-2017	E	501	5102	Yes	3		108	בלתי	UNIDENTIFIED	זרע	seed			2		2		1+			יואל מהמר על זרע של חומעה
SVT-4	Shivta	Tepper, Bar-Oz and Gini	Daniel Fuks	2016-2017	E	501	5102	Yes	3		109	בלתי	UNIDENTIFIED					1		1		1+			יואל: בלתי כרגע. להראות שוב יותר מאוחר
SVT-4	Shivta	Tepper, Bar-Oz and Gini	Daniel Fuks	2016-2017	E	501	5102	Yes	3		111	בלתי	UNIDENTIFIED	שבר				1		1		1+			.יואל: לא בטוח שאני יודע להשלים צורתו כמו שצריך, לא מתאים לחריריים, ראה עמ' 327
SVT-4	Shivta	Tepper, Bar-Oz and Gini	Daniel Fuks	2016-2017	E	501	5102	Yes	3		113	בלתי	UNIDENTIFIED	זרע שדוף				2		2		1+			יואל: שדופים
SVT-4	Shivta	Tepper, Bar-Oz and Gini	Daniel Fuks	2016-2017	E	501	5102	Yes	3		115	בלתי	UNIDENTIFIED					1		1		1+			יואל: נראה מצליב אך קשה מדיי להגדיר
SVT-4	Shivta	Tepper, Bar-Oz and Gini	Daniel Fuks	2016-2017	E	501	5102	Yes	3		116	בלתי	UNIDENTIFIED	זרע	seed			1		1		1+			לא סבונית. שורשון מקיף 3/4 זרע ויש דגם
SVT-4	Shivta	Tepper, Bar-Oz and Gini	Daniel Fuks	2016-2017	E	501	5102	Yes	3		119	בלתי	UNIDENTIFIED					1		1		1+			יואל ראה, אין כיוון בינתיים
SVT-4	Shivta	Tepper, Bar-Oz and Gini	Daniel Fuks	2016-2017	E	501	5102	Yes	3		121	בלתי	UNIDENTIFIED	קליפת זרע	seed coat			1		1		1+			דקה ועגולה
SVT-4	Shivta	Tepper, Bar-Oz and Gini	Daniel Fuks	2016-2017	E	501	5102	Yes	3		126		UNIDENTIFIED	ענפים	branches	דגניים?	Gramineae?	2		2		1+			פרויקט להגדיר. לא להתעסק
SVT-4	Shivta	Tepper, Bar-Oz and Gini	Daniel Fuks	2016-2017	E	501	5102	Yes	3		127	בלתי	UNIDENTIFIED	גבעול	stem			5		5		1+			יואל ראה
SVT-4	Shivta	Tepper, Bar-Oz and Gini	Daniel Fuks	2016-2017	E	501	5102	Yes	3		129	בלתי	UNIDENTIFIED									1+			יואל ראה
SVT-4	Shivta	Tepper, Bar-Oz and Gini	Daniel Fuks	2016-2017	E	501	5102	Yes	3		130	בלתי	UNIDENTIFIED					1		1		1+			יואל ראה, אין כיוון
SVT-4	Shivta	Tepper, Bar-Oz and Gini	Daniel Fuks	2016-2017	E	501	5102	Yes	3		131	בלתי	UNIDENTIFIED	תרמיל				1		1		1+			לחבר
SVT-4	Shivta	Tepper, Bar-Oz and Gini	Daniel Fuks	2016-2017	E	501	5102	Yes	3		132	בלתי	UNIDENTIFIED	ענבה?				1		1		1+			יואל ראה, אין כיוון
SVT-4	Shivta	Tepper, Bar-Oz and Gini	Daniel Fuks	2016-2017	E	501	5102	Yes	3		133	בלתי	UNIDENTIFIED					1		1		1+			לחבר
SVT-4	Shivta	Tepper, Bar-Oz and Gini	Daniel Fuks	2016-2017	E	501	5102	Yes	3		134	בלתי	UNIDENTIFIED	קשקש?				1		1		1+			לחבר
SVT-4	Shivta	Tepper, Bar-Oz and Gini	Daniel Fuks	2016-2017	E	501	5102	Yes	3		135	בלתי	UNIDENTIFIED					3		3		1+			שעירים, אולי מתנן, אולי מתנן. השווה 4-112
SVT-4	Shivta	Tepper, Bar-Oz and Gini	Daniel Fuks	2016-2017	E	501	5102	Yes	3		137	בלתי	UNIDENTIFIED					1		1		1+			לחבר, גדול וכדורי
SVT-4	Shivta	Tepper, Bar-Oz and Gini	Daniel Fuks	2016-2017	E	501	5102	Yes	3		138	בלתי	UNIDENTIFIED			סוככי?		1		1		1+			רצנטי?
SVT-4	Shivta	Tepper, Bar-Oz and Gini	Daniel Fuks	2016-2017	E	501	5102	Yes	3		140	בלתי	UNIDENTIFIED	קליפות								1+			תרמיל עדשה?? השווה ל-4-59
SVT-4	Shivta	Tepper, Bar-Oz and Gini	Daniel Fuks	2016-2017	E	501	5102	Yes	3		141	בלתי	UNIDENTIFIED	קליפות								1+			נראה של זרדים
SVT-4	Shivta	Tepper, Bar-Oz and Gini	Daniel Fuks	2016-2017	E	501	5102	Yes	3		142	בלתי	UNIDENTIFIED									1+			סיבים, זרעים?
SVT-4	Shivta	Tepper, Bar-Oz and Gini	Daniel Fuks	2016-2017	E	501	5102	Yes	3		207	בלתי	UNIDENTIFIED					1		1		0.5			יואל: או תלתן או פטריה
SVT-4	Shivta	Tepper, Bar-Oz and Gini	Daniel Fuks	2016-2017	E	501	5102	Yes	3		208	בלתי	UNIDENTIFIED					1		1		0.5
SVT-4	Shivta	Tepper, Bar-Oz and Gini	Daniel Fuks	2016-2017	E	501	5102	Yes	3		209	בלתי	UNIDENTIFIED					1		1		0.5			יואל ראה
SVT-4	Shivta	Tepper, Bar-Oz and Gini	Daniel Fuks	2016-2017	E	501	5102	Yes	3		210	בלתי	UNIDENTIFIED					1		1		0.5			או צואת חרק או מהזרעים הקטנים שצריך לחשוב עליהם
SVT-4	Shivta	Tepper, Bar-Oz and Gini	Daniel Fuks	2016-2017	E	501	5102	Yes	3		211	בלתי	UNIDENTIFIED					1		1		0.5			שורשון קטנית?
SVT-4	Shivta	Tepper, Bar-Oz and Gini	Daniel Fuks	2016-2017	E	501	5102	Yes	3		212	בלתי	UNIDENTIFIED					1		1		0.5
SVT-4	Shivta	Tepper, Bar-Oz and Gini	Daniel Fuks	2016-2017	E	501	5102	Yes	3		213	בלתי	UNIDENTIFIED					1		1		0.5			אולי לחיבור בהמשך. שבור במקום קריטי
SVT-4	Shivta	Tepper, Bar-Oz and Gini	Daniel Fuks	2016-2017	E	501	5102	Yes	3		214	בלתי	UNIDENTIFIED	ענף	branch			1		1		0.5			אולי עוקץ ענב. לא להתעסק
SVT-4	Shivta	Tepper, Bar-Oz and Gini	Daniel Fuks	2016-2017	E	501	5102	Yes	3		215	בלתי	UNIDENTIFIED					2		2		0.5			לא להתעסק
SVT-4	Shivta	Tepper, Bar-Oz and Gini	Daniel Fuks	2016-2017	E	501	5102	Yes	3		217	בלתי	UNIDENTIFIED					2		2		0.5			לא להתעסק
SVT-4	Shivta	Tepper, Bar-Oz and Gini	Daniel Fuks	2016-2017	E	501	5102	Yes	3		218	בלתי	UNIDENTIFIED					1		1		0.5			מחברת 2, עמ'29
SVT-4	Shivta	Tepper, Bar-Oz and Gini	Daniel Fuks	2016-2017	E	501	5102	Yes	3		219	בלתי	UNIDENTIFIED					3		3		0.5			אולי מצליבים קטנים, אך יהיה קשה מאד להגדיר
SVT-4	Shivta	Tepper, Bar-Oz and Gini	Daniel Fuks	2016-2017	E	501	5102	Yes	3		237	בלתי	UNIDENTIFIED	גבעול				1		1		0.5
SVT-4	Shivta	Tepper, Bar-Oz and Gini	Daniel Fuks	2016-2017	E	501	5102	Yes	3		241	בלתי	UNIDENTIFIED	זרע	seed			4		4		0.5			בכיוון גרגרנית הכוכב אבל קשה להוכיח
SVT-13	Shivta	Tepper, Bar-Oz and Gini				503	5039				32	חיטה	Triticum sp.	גרגיר	grain			13		13	13	<2
SVT-14	Shivta	Tepper, Bar-Oz and Gini	Daniel Fuks	2016-2018	E	504	5029	Yes	3		2	חיטה	Triticum sp.	גרגיר	grain	דגניים	Gramineae	26	2	28	28	1+	2
SVT-140	Shivta	Tepper, Bar-Oz and Gini	Daniel Fuks	2016-2017	E	504	5029	No	3		2	חיטה	Triticum sp.	גרגיר	grain	דגניים	Gramineae			27	27			2
SVT-140	Shivta	Tepper, Bar-Oz and Gini	Daniel Fuks	2016-2017	E	504	5029	No	3		19	חיטה	Triticum sp.	גרגיר	grain	דגניים	Gramineae			20	20			1
SVT-2	Shivta	Tepper, Bar-Oz and Gini	Daniel Fuks	2016-2017	E	501	5006	Yes	3	1	11	חיטה	Triticum sp.	חלקי שדרה	rachis fragments	דגניים	Gramineae	3		3		1mm+
SVT-4	Shivta	Tepper, Bar-Oz and Gini	Daniel Fuks	2016-2017	E	501	5102	Yes	3	1	3	חיטה	Triticum sp.	גרגיר	grain	דגניים	Gramineae	11	2	13	13	1mm+	2		טיפוס 1
SVT-5	Shivta	Tepper, Bar-Oz and Gini	Daniel Fuks	2016-2017	E	501	5110	Yes	3		2	חיטה	Triticum sp.	גרגיר	grain	דגניים	Gramineae	39	4	43	43	1+	2
SVT-6	Shivta	Tepper, Bar-Oz and Gini	Daniel Fuks	2016-2017	E	501	5111	Yes	3		2	חיטה	Triticum sp.	גרגיר	grain	דגניים	Gramineae	37	5	42	42	1+	2
SVT-4	Shivta	Tepper, Bar-Oz and Gini	Daniel Fuks	2016-2017	E	501	5102	Yes	3	1	12	לחבר בהמשך		גרגיר	grain	דגניים	Gramineae	3		3		1mm+
SVT-4	Shivta	Tepper, Bar-Oz and Gini	Daniel Fuks	2016-2017	E	501	5102	Yes	3	1	23	דגני		גרגיר	grain	דגניים	Gramineae	26		26		1mm+			שונות - למיין בסוף
SVT-4	Shivta	Tepper, Bar-Oz and Gini	Daniel Fuks	2016-2017	E	501	5102	Yes	3	1	24			שברי גרגיר	grain fragments	דגניים	Gramineae					1mm+
SVT-4	Shivta	Tepper, Bar-Oz and Gini	Daniel Fuks	2016-2017	E	501	5102	Yes	3	1	48	דגני +גלל?		גלל עם שברי גלומה?	glume fragments in pellets?	דגניים	Gramineae					1mm+			מעניין, לחזור לזה
SVT-4	Shivta	Tepper, Bar-Oz and Gini	Daniel Fuks	2016-2017	E	501	5102	Yes	3	1	49	דגני +גלל?		גלל עם שברי גלומה?	glume fragments in pellets?	דגניים	Gramineae					1mm+			מעניין, לחזור לזה
SVT-4	Shivta	Tepper, Bar-Oz and Gini	Daniel Fuks	2016-2017	E	501	5102	Yes	3	1	50	דגני +גלל?		גלל עם שברי גלומה??	glume fragments in pellets??	דגניים	Gramineae					1mm+			מעניין, לחזור לזה
SVT-4	Shivta	Tepper, Bar-Oz and Gini	Daniel Fuks	2016-2017	E	501	5102	Yes	3	1	51	שעורה?		גלומה	glume	דגניים	Gramineae					1mm+
SVT-4	Shivta	Tepper, Bar-Oz and Gini	Daniel Fuks	2016-2017	E	501	5102	Yes	3	1	52	דגני		שברי גלומה ומלען	glume and awn fragments	דגניים	Gramineae					1mm+
SVT-4	Shivta	Tepper, Bar-Oz and Gini	Daniel Fuks	2016-2017	E	501	5102	Yes	3	1	53	דגני		שרשי דגן	culm roots	דגניים	Gramineae	8		8		1mm+
SVT-4	Shivta	Tepper, Bar-Oz and Gini	Daniel Fuks	2016-2017	E	501	5102	Yes	3	1	54	דגני		חלקי גבעול	culm internodes	דגניים	Gramineae					1mm+
SVT-4	Shivta	Tepper, Bar-Oz and Gini	Daniel Fuks	2016-2017	E	501	5102	Yes	3	1	55	דגני		שברי גבעול	culm node and fragments	דגניים	Gramineae	53		53		1mm+			culm nodes not removed
SVT-4	Shivta	Tepper, Bar-Oz and Gini	Daniel Fuks	2016-2017	E	501	5102	Yes	3	1	56	דגני		תחתית גבעול עם ניצן	stem segment with bud	דגניים	Gramineae					1mm+
SVT-4	Shivta	Tepper, Bar-Oz and Gini	Daniel Fuks	2016-2017	E	501	5102	Yes	3	2	62	בקיי		זרע	seed	פרפרניים	Fabaceae	2		2	2	1mm+
SVT-4	Shivta	Tepper, Bar-Oz and Gini	Daniel Fuks	2016-2017	E	501	5102	Yes	3	2	63	בקיי		זרע	seed	פרפרניים	Fabaceae	4		4	4	1mm+
SVT-4	Shivta	Tepper, Bar-Oz and Gini	Daniel Fuks	2016-2017	E	501	5102	Yes	3	2	64	בקיי		פסיג	cotyledon	פרפרניים	Fabaceae			1	1	1+			11פסיגים
SVT-4	Shivta	Tepper, Bar-Oz and Gini	Daniel Fuks	2016-2017	E	501	5102	Yes	3	2	65	כרוב/כרבה?		זרע	seed	מצליבים?	Brassicaceae?	1		1		1+					1של 1מ"מ
SVT-4	Shivta	Tepper, Bar-Oz and Gini	Daniel Fuks	2016-2017	E	501	5102	Yes	3	2	66	בלתי		זרע	seed	פרפרניים?	Fabaceae?	1		1		1+			יש לו טבורית של פרפרני אך לא רואים עדשה ויש מין רישות בחיבור הקליפה לזרע		3של 1מ"מ
SVT-4	Shivta	Tepper, Bar-Oz and Gini	Daniel Fuks	2016-2017	E	501	5102	Yes	3	2	70	בלתי		זרע	seed	פרפרניים	Fabaceae	7		7		1+			לא בטוח שהכל אותו דבר
SVT-4	Shivta	Tepper, Bar-Oz and Gini	Daniel Fuks	2016-2017	E	501	5102	Yes	3	2	71	בלתי		זרע	seed	פרפרניים	Fabaceae	2		2		1+			אחד חשש לאספסת, השני אולי לא פרפרני אבל שניהם דומים זה לזה
SVT-4	Shivta	Tepper, Bar-Oz and Gini	Daniel Fuks	2016-2017	E	501	5102	Yes	3	2	73	קטנית קטנה		זרע	seed	פרפרניים	Fabaceae	1		1		1+			קטנית קטנה ומעוותת
SVT-4	Shivta	Tepper, Bar-Oz and Gini	Daniel Fuks	2016-2017	E	501	5102	Yes	3		92	עפץ של אשל?						1		1		1+			צריך לאסוף עפצים של אשל
SVT-4	Shivta	Tepper, Bar-Oz and Gini	Daniel Fuks	2016-2017	E	501	5102	Yes	3		94	בלתי				מצליבים?	Brassicaceae?	1		1		1+			חיפשתי במצליבים. ראה עמ' 7 מחברת 2
SVT-4	Shivta	Tepper, Bar-Oz and Gini	Daniel Fuks	2016-2017	E	501	5102	Yes	3		98	להגדרה בהמשך		מצעית	head	מורכבים	Asteraceae					1+
SVT-4	Shivta	Tepper, Bar-Oz and Gini	Daniel Fuks	2016-2017	E	501	5102	Yes	3		99	להגדרה בהמשך		מצעית	head	מורכבים	Asteraceae					1+
SVT-4	Shivta	Tepper, Bar-Oz and Gini	Daniel Fuks	2016-2017	E	501	5102	Yes	3		100	בקיים		זרע	seed	פרפרניים	Fabaceae	1		1	1	1+			כנראה כרשינה ירוקה ומעוותת אך לא ניתן להגדיר
SVT-4	Shivta	Tepper, Bar-Oz and Gini	Daniel Fuks	2016-2017	E	501	5102	Yes	3		101	בלתי		זרע	seed	פרפרניים	Fabaceae	4		4		1+			דומה לזנב העקרב
SVT-4	Shivta	Tepper, Bar-Oz and Gini	Daniel Fuks	2016-2017	E	501	5102	Yes	3		107	להגדרה בהמשך		זרע	seed			1		1		1+			מאד קרוב לגומא משחיר. נבדקו ארכוביתיים שיש באוסף, לא הכל יש
SVT-4	Shivta	Tepper, Bar-Oz and Gini	Daniel Fuks	2016-2017	E	501	5102	Yes	3		112			גביע		שפתניים		1		1		1+
SVT-4	Shivta	Tepper, Bar-Oz and Gini	Daniel Fuks	2016-2017	E	501	5102	Yes	3		117	בלתי		זרעון?	achene?	מורכבים?	Asteraceae?	1		1		1+			לחבר בהמשך
SVT-4	Shivta	Tepper, Bar-Oz and Gini	Daniel Fuks	2016-2017	E	501	5102	Yes	3		118	זרע בגלל		זרע בגלל				1		1		1+			יואל: נראה דגני/גומאי/סמרי. אפשר למדוד ולהכניס למגדיר
SVT-4	Shivta	Tepper, Bar-Oz and Gini	Daniel Fuks	2016-2017	E	501	5102	Yes	3		123	להגדרה בהמשך		גרגיר?	grain?	דגניים?	Gramineae?	3		3		1+			יש עוד בדגימות אחרות. להגדיר בהמשך
SVT-4	Shivta	Tepper, Bar-Oz and Gini	Daniel Fuks	2016-2017	E	501	5102	Yes	3		128	זחל?						1		1		1+			יואל ראה
SVT-4	Shivta	Tepper, Bar-Oz and Gini	Daniel Fuks	2016-2017	E	501	5102	Yes	3		139	בלתי		גרגיר	grain	דגניים	Gramineae	1		1		1+			מחברת 2 עמ' 23
SVT-4	Shivta	Tepper, Bar-Oz and Gini	Daniel Fuks	2016-2017	E	501	5102	Yes	3		143	גלל מכרסם?						2		2		1+
SVT-4	Shivta	Tepper, Bar-Oz and Gini	Daniel Fuks	2016-2017	E	501	5102	Yes	3		144	חרקים		רגליים, ראש נמלה ועוד								1+			מפוחמים
SVT-4	Shivta	Tepper, Bar-Oz and Gini	Daniel Fuks	2016-2017	E	501	5102	Yes	3		145	בלתי - שונות										1+			אולי לחזור לחבר בעתיד
SVT-4	Shivta	Tepper, Bar-Oz and Gini	Daniel Fuks	2016-2017	E	501	5102	Yes	3	1	150	לחבר בהמשך		גרגיר	grain	דגניים	Gramineae	3		3		0.5
SVT-4	Shivta	Tepper, Bar-Oz and Gini	Daniel Fuks	2016-2017	E	501	5102	Yes	3	1	156	להגדרה בהמשך		גרגיר	grain	דגניים	Gramineae	1		1		0.5			בכיוון עוקצר - מחבר2 עמ'38
SVT-4	Shivta	Tepper, Bar-Oz and Gini	Daniel Fuks	2016-2017	E	501	5102	Yes	3	1	158	דגני		גרגיר	grain	דגניים	Gramineae	2		2		0.5			יכול להתחבר לש"ש
SVT-4	Shivta	Tepper, Bar-Oz and Gini	Daniel Fuks	2016-2017	E	501	5102	Yes	3	1	159	דגני		גרגיר	grain	דגניים	Gramineae	2		2		0.5			אחד אולי שעורה ואולי משהו אחר. לחבר בהמשך
SVT-4	Shivta	Tepper, Bar-Oz and Gini	Daniel Fuks	2016-2017	E	501	5102	Yes	3	1	160	להגדרה בהמשך						1		1		0.5
SVT-4	Shivta	Tepper, Bar-Oz and Gini	Daniel Fuks	2016-2017	E	501	5102	Yes	3	1	161	להגדרה בהמשך		זרע?	seed?	שפתניים?	Liliaceae?	145		145		0.5			2מבחנות-אחד עם דוגמאות להגדרה-הכי קרוב בינתיים היה זוטה
SVT-4	Shivta	Tepper, Bar-Oz and Gini	Daniel Fuks	2016-2017	E	501	5102	Yes	3	1	162	בלתי		גרגיר	grain	דגניים	Gramineae	4		4		0.5			דומה לקוטנדיה (4-149) אך אין הצדקה לחיבור
SVT-4	Shivta	Tepper, Bar-Oz and Gini	Daniel Fuks	2016-2017	E	501	5102	Yes	3	1	164	בלתי		ניצן?	bud?			2		2		0.5			עטוי
SVT-4	Shivta	Tepper, Bar-Oz and Gini	Daniel Fuks	2016-2017	E	501	5102	Yes	3	1	165	בלתי						3		3		0.5			מעניין, אולי לפוסט
SVT-4	Shivta	Tepper, Bar-Oz and Gini	Daniel Fuks	2016-2017	E	501	5102	Yes	3	1	166	בלתי		גרגיר	grain	דגניים	Gramineae	5		5		0.5			שונות
SVT-4	Shivta	Tepper, Bar-Oz and Gini	Daniel Fuks	2016-2017	E	501	5102	Yes	3	1	167	דגני		עובר	embryo			6		6		0.5			לא כולם ודאיים
SVT-4	Shivta	Tepper, Bar-Oz and Gini	Daniel Fuks	2016-2017	E	501	5102	Yes	3		172	פרפרני להגדרה		זרע	seed	פרפרניים	Fabaceae	7		7		0.5
SVT-4	Shivta	Tepper, Bar-Oz and Gini	Daniel Fuks	2016-2017	E	501	5102	Yes	3		173	פרפרני להגדרה		זרע	seed	פרפרניים	Fabaceae	1		1		0.5
SVT-4	Shivta	Tepper, Bar-Oz and Gini	Daniel Fuks	2016-2017	E	501	5102	Yes	3		174	גרגרנית/שברק		זרע	seed	פרפרניים	Fabaceae	2		2		0.5			נפתח
SVT-4	Shivta	Tepper, Bar-Oz and Gini	Daniel Fuks	2016-2017	E	501	5102	Yes	3		175	פרפרני להגדרה		זרע	seed	פרפרניים	Fabaceae	4		4		0.5
SVT-4	Shivta	Tepper, Bar-Oz and Gini	Daniel Fuks	2016-2017	E	501	5102	Yes	3		176	פרפרני להגדרה		זרע	seed	פרפרניים	Fabaceae	62		62		0.5			שורשון מתעבה ומצטרר, קצהו עד כמעט קצה הפסיג, אין דגם מיוחד
SVT-4	Shivta	Tepper, Bar-Oz and Gini	Daniel Fuks	2016-2017	E	501	5102	Yes	3		177	פרפרני להגדרה		זרע	seed	פרפרניים	Fabaceae	12		12		0.5			שורשון ארוך מפסיג
SVT-4	Shivta	Tepper, Bar-Oz and Gini	Daniel Fuks	2016-2017	E	501	5102	Yes	3		178	פרפרני להגדרה		זרע	seed	פרפרניים	Fabaceae	2		2		0.5			שורשון באורך הפסיג
SVT-4	Shivta	Tepper, Bar-Oz and Gini	Daniel Fuks	2016-2017	E	501	5102	Yes	3		180	פרפרני להגדרה		זרע	seed	פרפרניים	Fabaceae	2		2		0.5
SVT-4	Shivta	Tepper, Bar-Oz and Gini	Daniel Fuks	2016-2017	E	501	5102	Yes	3		181	פרפרני להגדרה		זרע	seed	פרפרניים	Fabaceae	7		7		0.5
SVT-4	Shivta	Tepper, Bar-Oz and Gini	Daniel Fuks	2016-2017	E	501	5102	Yes	3		182	פרפרני בלתי		זרע	seed	פרפרניים	Fabaceae	3		3		0.5
SVT-4	Shivta	Tepper, Bar-Oz and Gini	Daniel Fuks	2016-2017	E	501	5102	Yes	3		183	בלתי		זרע	seed			17		17		0.5			נפלו, הצלתי כמעט כולם. לחבר עם 241 בתור ספק פרפרניים
SVT-4	Shivta	Tepper, Bar-Oz and Gini	Daniel Fuks	2016-2017	E	501	5102	Yes	3		184	פרפרני להגדרה		זרע	seed	פרפרניים	Fabaceae	2		2		0.5			אספסת?
SVT-4	Shivta	Tepper, Bar-Oz and Gini	Daniel Fuks	2016-2017	E	501	5102	Yes	3		185	דגני		גרגיר	grain	דגניים	Gramineae	1		1		0.5
SVT-4	Shivta	Tepper, Bar-Oz and Gini	Daniel Fuks	2016-2017	E	501	5102	Yes	3		187	דגני		פרק ציר שיבולת	rachis fragments	דגניים	Gramineae	2		2		0.5			מעניין
SVT-4	Shivta	Tepper, Bar-Oz and Gini	Daniel Fuks	2016-2017	E	501	5102	Yes	3		188	דגני?		פרק ציר שיבולת?	rachis fragments?	דגניים	Gramineae	1		1		0.5
SVT-4	Shivta	Tepper, Bar-Oz and Gini	Daniel Fuks	2016-2017	E	501	5102	Yes	3		189	דגני?		פרק ציר שיבולת?	rachis fragments?	דגניים	Gramineae	1		1		0.5
SVT-4	Shivta	Tepper, Bar-Oz and Gini	Daniel Fuks	2016-2017	E	501	5102	Yes	3		190	דגני?		פרק ציר שיבולת?	rachis fragments?	דגניים	Gramineae	1		1		0.5
SVT-4	Shivta	Tepper, Bar-Oz and Gini	Daniel Fuks	2016-2017	E	501	5102	Yes	3		191			פרק ציר שיבולת	rachis fragments	דגניים	Gramineae	20		20		0.5			לא להתעסק
SVT-4	Shivta	Tepper, Bar-Oz and Gini	Daniel Fuks	2016-2017	E	501	5102	Yes	3		192			חלקי גלומה	glume fragments	דגניים	Gramineae					0.5
SVT-4	Shivta	Tepper, Bar-Oz and Gini	Daniel Fuks	2016-2017	E	501	5102	Yes	3		193			חלקים שונים	various fragments	דגניים	Gramineae					0.5
SVT-4	Shivta	Tepper, Bar-Oz and Gini	Daniel Fuks	2016-2017	E	501	5102	Yes	3		194	בלתי				דגניים	Gramineae	4		4		0.5
SVT-4	Shivta	Tepper, Bar-Oz and Gini	Daniel Fuks	2016-2017	E	501	5102	Yes	3		202	ארכוביתי?						1		1		0.5
SVT-4	Shivta	Tepper, Bar-Oz and Gini	Daniel Fuks	2016-2017	E	501	5102	Yes	3		203	אספרגולה?						7		7		0.5
SVT-4	Shivta	Tepper, Bar-Oz and Gini	Daniel Fuks	2016-2017	E	501	5102	Yes	3		204	מורכבים		זרעון	achene	מורכבים	Asteraceae	8		8		0.5
SVT-4	Shivta	Tepper, Bar-Oz and Gini	Daniel Fuks	2016-2017	E	501	5102	Yes	3		206			זרע	seed	חלמיתיים	Malvaceae	1		1		0.5			לא להגדרה
SVT-4	Shivta	Tepper, Bar-Oz and Gini	Daniel Fuks	2016-2017	E	501	5102	Yes	3		220	בלתי						1		1		0.5
SVT-4	Shivta	Tepper, Bar-Oz and Gini	Daniel Fuks	2016-2017	E	501	5102	Yes	3		221	בלתי						1		1		0.5
SVT-4	Shivta	Tepper, Bar-Oz and Gini	Daniel Fuks	2016-2017	E	501	5102	Yes	3		222	בלתי		תרמיל?				1		1		0.5
SVT-4	Shivta	Tepper, Bar-Oz and Gini	Daniel Fuks	2016-2017	E	501	5102	Yes	3		223	בלתי						3		3		0.5			שונות
SVT-4	Shivta	Tepper, Bar-Oz and Gini	Daniel Fuks	2016-2017	E	501	5102	Yes	3		224	בלתי						3		3		0.5			שונות
SVT-4	Shivta	Tepper, Bar-Oz and Gini	Daniel Fuks	2016-2017	E	501	5102	Yes	3		225	בלתי						3		3		0.5			שונות
SVT-4	Shivta	Tepper, Bar-Oz and Gini	Daniel Fuks	2016-2017	E	501	5102	Yes	3		226	בלתי						4		4		0.5			שונות
SVT-4	Shivta	Tepper, Bar-Oz and Gini	Daniel Fuks	2016-2017	E	501	5102	Yes	3		227	בלתי						13		13		0.5			שונות
SVT-4	Shivta	Tepper, Bar-Oz and Gini	Daniel Fuks	2016-2017	E	501	5102	Yes	3		228	בלתי						1		1		0.5
SVT-4	Shivta	Tepper, Bar-Oz and Gini	Daniel Fuks	2016-2017	E	501	5102	Yes	3		229	בלתי						עשרות		20		0.5			שונות
SVT-4	Shivta	Tepper, Bar-Oz and Gini	Daniel Fuks	2016-2017	E	501	5102	Yes	3		230	בלתי						1		1		0.5
SVT-4	Shivta	Tepper, Bar-Oz and Gini	Daniel Fuks	2016-2017	E	501	5102	Yes	3		231	בלתי						3		3		0.5
SVT-4	Shivta	Tepper, Bar-Oz and Gini	Daniel Fuks	2016-2017	E	501	5102	Yes	3		232	בלתי		קוצים				1		1		0.5			היו מחוברים
SVT-4	Shivta	Tepper, Bar-Oz and Gini	Daniel Fuks	2016-2017	E	501	5102	Yes	3		233	בלתי						3		3		0.5
SVT-4	Shivta	Tepper, Bar-Oz and Gini	Daniel Fuks	2016-2017	E	501	5102	Yes	3		234	בלתי										0.5			מקור חסידה? דגני?
SVT-4	Shivta	Tepper, Bar-Oz and Gini	Daniel Fuks	2016-2017	E	501	5102	Yes	3		235	מתנן?		ניצן?				3		3		0.5
SVT-4	Shivta	Tepper, Bar-Oz and Gini	Daniel Fuks	2016-2017	E	501	5102	Yes	3		236	בלתי						1		1		0.5
SVT-4	Shivta	Tepper, Bar-Oz and Gini	Daniel Fuks	2016-2017	E	501	5102	Yes	3		238	בלתי						3		3		0.5			רצנטי?
SVT-4	Shivta	Tepper, Bar-Oz and Gini	Daniel Fuks	2016-2017	E	501	5102	Yes	3		239	חרק		רגל				1		1		0.5			נראה קדום
SVT-4	Shivta	Tepper, Bar-Oz and Gini	Daniel Fuks	2016-2017	E	501	5102	Yes	3		240	בלתי-שונות										0.5			לא להתעסק
SVT-4	Shivta	Tepper, Bar-Oz and Gini	Daniel Fuks	2016-2017	E	501	5102	Yes	3		246	דגני מתוך גלל?		גרגיר ששעבר בגלל?	grain from dung?	דגניים	Gramineae	1		1		1?
SVT-4	Shivta	Tepper, Bar-Oz and Gini	Daniel Fuks	2016-2017	E	501	5102	Yes	3		247	לחבר בהמשך		גרגיר	grain	דגניים	Gramineae	1		1		1			כיוון שעורה
SVT-4	Shivta	Tepper, Bar-Oz and Gini	Daniel Fuks	2016-2017	E	501	5102	Yes	3		248	לחבר בהמשך		גרגיר	grain	דגניים	Gramineae	1		1		1			מחברת 2 עמ' 35
SVT-4	Shivta	Tepper, Bar-Oz and Gini	Daniel Fuks	2016-2017	E	501	5102	Yes	3		249	לחבר בהמשך		גרגיר	grain	דגניים	Gramineae	1		1		1			כיוון ש"ש, עמ' 328 מחברת 1
SVT-4	Shivta	Tepper, Bar-Oz and Gini	Daniel Fuks	2016-2017	E	501	5102	Yes	3		250	לחבר בהמשך		גרגיר	grain	דגניים	Gramineae	1		1		1			עמ1 313 מחברת 1
SVT-4	Shivta	Tepper, Bar-Oz and Gini	Daniel Fuks	2016-2017	E	501	5102	Yes	3		252	לחבר בהמשך		גרגיר	grain	דגניים	Gramineae	1		1		1			המגנית מרמז על ש"ש עמ' 322
SVT-4	Shivta	Tepper, Bar-Oz and Gini	Daniel Fuks	2016-2017	E	501	5102	Yes	3		255	עצם											2
SVT-7	Shivta	Tepper, Bar-Oz and Gini	Daniel Fuks	2016-2018	E	501	5118	Yes	3		2	חיטה	Triticum sp.	גרגיר	grain	דגניים	Gramineae	24	26	50	50	1+	2
SVT-8	Shivta	Tepper, Bar-Oz and Gini	Daniel Fuks	2016-2018	E	502	5010	Yes	3		1	חיטה	Triticum sp.	גרגיר	grain	דגניים	Gramineae	2		2	2	0.3+
SVT-5	Shivta	Tepper, Bar-Oz and Gini	Daniel Fuks	2016-2017	E	501	5110	Yes	3		3	חיטה/שעורה	Hordeum/Triticum	גרגיר	grain	דגניים	Gramineae	15	11	26	26	1+	2
SVT-140	Shivta	Tepper, Bar-Oz and Gini	Daniel Fuks	2016-2017	E	504	5029	No	3		31	חיטה טטרפלוידית	Triticum turgidum s.l.	פרק ציר שיבולת	rachis fragments	דגניים	Gramineae			38	38			1	includes 2 pieces with 2 segments each
SVT-5	Shivta	Tepper, Bar-Oz and Gini	Daniel Fuks	2016-2017	E	501	5110	Yes	3		5	שעורה/זון	Hordeum vulgare/Lolium temulentum	גרגיר	grain	דגניים	Gramineae	5		5		1+
SVT-5	Shivta	Tepper, Bar-Oz and Gini	Daniel Fuks	2016-2017	E	501	5110	Yes	3		6	חיטה/שעורה	Hordeum/Triticum	שברי גרגיר	grain fragments	דגניים	Gramineae					1+	2
SVT-5	Shivta	Tepper, Bar-Oz and Gini	Daniel Fuks	2016-2017	E	501	5110	Yes	3		7			פרק גבעול	culm node	דגניים	Gramineae	39		39		1+
SVT-5	Shivta	Tepper, Bar-Oz and Gini	Daniel Fuks	2016-2017	E	501	5110	Yes	3		8			שורשים	roots	דגניים	Gramineae	5		5		1+
SVT-5	Shivta	Tepper, Bar-Oz and Gini	Daniel Fuks	2016-2017	E	501	5110	Yes	3		9			שברי גלומה ומלען	glume and awn fragments	דגניים	Gramineae					1+
SVT-4	Shivta	Tepper, Bar-Oz and Gini	Daniel Fuks	2016-2017	E	501	5102	Yes	3	1	31	חיטה טטרפלוידית	Triticum turgidum s.l.	פרק ציר שיבולת	rachis fragments	דגניים	Gramineae	29		29		1mm+			1שלישיה, 3כפולים
SVT-5	Shivta	Tepper, Bar-Oz and Gini	Daniel Fuks	2016-2017	E	501	5110	Yes	3		11	שעורה דו-טורית	Hordeum vulgare disticum?	חלקי שדרה	rachis segment	דגניים	Gramineae	3		3		1+
SVT-4	Shivta	Tepper, Bar-Oz and Gini	Daniel Fuks	2016-2017	E	501	5102	Yes	3	5	120	סבונית השדות	Vaccaria hispanica	זרע	seed	ציפורניים	Caryophyllaceae	1		1		1+			יואל: אין אפס
SVT-4	Shivta	Tepper, Bar-Oz and Gini	Daniel Fuks	2016-2017	E	501	5102	Yes	3		243	סבונית השדות	Vaccaria hispanica	זרע	seed	ציפורניים	Caryophyllaceae	2		2		0.5
SVT-1	Shivta	Tepper, Bar-Oz and Gini	Daniel Fuks	2016-2017	E	500	5003	Yes	3	2	14	בקיית הכרשינה?	Vicia ervilia	זרע	seed	פרפרניים	Fabaceae	2		2	2	1mm+			לוודא מול כל הכרשינות בסוף
SVT-10	Shivta	Tepper, Bar-Oz and Gini	Daniel Fuks	2016-2018	E	503	5016	Yes	3		7	בקיית הכרשינה	Vicia ervilia	זרע	seed	פרפרניים	Fabaceae	2		2		1+
SVT-11	Shivta	Tepper, Bar-Oz and Gini	Daniel Fuks	2016-2018	E	503	5018	Yes	3		11	בקיית הכרשינה	Vicia ervilia	זרע	Vicia ervilia	פרפרניים	Fabaceae	4		4		1+
SVT-5	Shivta	Tepper, Bar-Oz and Gini	Daniel Fuks	2016-2017	E	501	5110	Yes	3		17	קטניות לחיבור?		זרע	seed	פרפרניים	Fabaceae	3		3		1+
SVT-5	Shivta	Tepper, Bar-Oz and Gini	Daniel Fuks	2016-2017	E	501	5110	Yes	3		18	קטניות בלתי		זרע	seed	פרפרניים	Fabaceae	5		5		1+					1של 1מ"מ
SVT-5	Shivta	Tepper, Bar-Oz and Gini	Daniel Fuks	2016-2017	E	501	5110	Yes	3		19	קטניות בלתי		פסיגים ושברים	cotyleda and fragments	פרפרניים	Fabaceae					1+
SVT-5	Shivta	Tepper, Bar-Oz and Gini	Daniel Fuks	2016-2017	E	501	5110	Yes	3		20	אספסת/קדד/גרגרנית	Medicago/Astragalus/Trigonella	זרע	seed	פרפרניים	Fabaceae	2		2		1+
SVT-5	Shivta	Tepper, Bar-Oz and Gini	Daniel Fuks	2016-2017	E	501	5110	Yes	3		21	דגני להגדרה		גרגיר	grain	דגניים	Gramineae	2		2		1+
SVT-12	Shivta	Tepper, Bar-Oz and Gini	Daniel Fuks	2016-2018	E	503	5019	Yes	3		12	בקיית הכרשינה	Vicia ervilia	זרע	Vicia ervilia	פרפרניים	Fabaceae	4	1	4		1+	2
SVT-5	Shivta	Tepper, Bar-Oz and Gini	Daniel Fuks	2016-2017	E	501	5110	Yes	3		23	חלמית	Malva	זרע	seed	חלמיתיים	Malvaceae	2		2		1+			להגדרה
SVT-13	Shivta	Tepper, Bar-Oz and Gini	Daniel Fuks	2016-2018	E	503	5039	Yes	3		16	בקיית הכרשינה	Vicia ervilia	זרע		פרפרניים	Fabaceae	3		3		2			Light F: 1seed and 3 cotyleda
SVT-14	Shivta	Tepper, Bar-Oz and Gini	Daniel Fuks	2016-2018	E	504	5029	Yes	3		14	בקיית הכרשינה	Vicia ervilia	זרע	seed	פרפרניים	Fabaceae	1	4	5	5	1+			Light F:2 cotyleda, Heavy F: 1 cotyledon, 3 seeds
SVT-140	Shivta	Tepper, Bar-Oz and Gini	Daniel Fuks	2016-2017	E	504	5029	No	3		14	בקיית הכרשינה	Vicia ervilia	זרע	seed	פרפרניים	Fabaceae			7	7			2	cotyleda counted as half
SVT-140	Shivta	Tepper, Bar-Oz and Gini	Daniel Fuks	2016-2017	E	504	5029	No	3		50	בקיית הכרשינה	Vicia ervilia	זרע	seed	פרפרניים	Fabaceae			1	1			1
SVT-5	Shivta	Tepper, Bar-Oz and Gini	Daniel Fuks	2016-2017	E	501	5110	Yes	3		28	דבקה/חספסנית						1		1		1+			להגדרה
SVT-15	Shivta	Tepper, Bar-Oz and Gini	Daniel Fuks	2016-2017	E	505	5031	Yes	3		12	בקיית הכרשינה	Vicia ervilia	זרע	seed	פרפרניים	Fabaceae	1?	2	2	2	1+			Light F:2פסיגים
SVT-5	Shivta	Tepper, Bar-Oz and Gini	Daniel Fuks	2016-2017	E	501	5110	Yes	3		30	חלמית? מצליבים?	Malva?	גביע	calyx							1+			להגדרה
SVT-16	Shivta	Tepper, Bar-Oz and Gini	Daniel Fuks	2016-2017	E	505	5037	Yes	3		18	בקיית הכרשינה	Vicia ervilia	פסיג וזרע	cotyledon and seed	פרפרניים	Fabaceae	4		4	4	1+
SVT-5	Shivta	Tepper, Bar-Oz and Gini	Daniel Fuks	2016-2017	E	501	5110	Yes	3		32	דבקה?										1+
SVT-5	Shivta	Tepper, Bar-Oz and Gini	Daniel Fuks	2016-2017	E	501	5110	Yes	3		33	קחוון?										1+
SVT-5	Shivta	Tepper, Bar-Oz and Gini	Daniel Fuks	2016-2017	E	501	5110	Yes	3		34	?חיעד ספרדי						2		2		1+
SVT-19	Shivta	Tepper, Bar-Oz and Gini	Daniel Fuks	2016-2017	E	507	5045	Yes	1.5		7	בקיית הכרשינה	Vicia ervilia	זרע	seed	פרפרניים	Fabaceae	1		1		1+
SVT-5	Shivta	Tepper, Bar-Oz and Gini	Daniel Fuks	2016-2017	E	501	5110	Yes	3		36	דמומית?	Adonis?					1		1		1+
SVT-5	Shivta	Tepper, Bar-Oz and Gini	Daniel Fuks	2016-2017	E	501	5110	Yes	3		37	בלתי -ליואל										1+
SVT-5	Shivta	Tepper, Bar-Oz and Gini	Daniel Fuks	2016-2017	E	501	5110	Yes	3		38	בלתי -ליואל						1	2	1		1+			אלה מה-heavy fraction כנראה ברי הגדרה
SVT-5	Shivta	Tepper, Bar-Oz and Gini	Daniel Fuks	2016-2017	E	501	5110	Yes	3		39	בלתי -ליואל										1+
SVT-5	Shivta	Tepper, Bar-Oz and Gini	Daniel Fuks	2016-2017	E	501	5110	Yes	3		40	בלתי -ליואל										1+
SVT-5	Shivta	Tepper, Bar-Oz and Gini	Daniel Fuks	2016-2017	E	501	5110	Yes	3		41	בלתי - לחבר בהמשך										1+			ענבה? אל?
SVT-5	Shivta	Tepper, Bar-Oz and Gini	Daniel Fuks	2016-2017	E	501	5110	Yes	3		42	בלתי-שונות										1+	2
SVT-5	Shivta	Tepper, Bar-Oz and Gini	Daniel Fuks	2016-2017	E	501	5110	Yes	3		43	גלל										1+	2
SVT-5	Shivta	Tepper, Bar-Oz and Gini	Daniel Fuks	2016-2017	E	501	5110	Yes	3		44	זרע בגלל	Malva aegyptica??	זרע	seed			1		1			2
SVT-5	Shivta	Tepper, Bar-Oz and Gini	Daniel Fuks	2016-2017	E	501	5110	Yes	3		45	בלתי -ליואל							1				2
SVT-2	Shivta	Tepper, Bar-Oz and Gini	Daniel Fuks	2016-2017	E	501	5006	Yes	3	2	5	בקיית הכרשינה	Vicia ervilia	זרע	seed	פרפרניים	Fabaceae	2		2	2	1mm+
SVT-2	Shivta	Tepper, Bar-Oz and Gini	Daniel Fuks	2016-2017	E	501	5006	Yes	3	2	6	בקיית הכרשינה?	Vicia ervilia	פסיג	cotyledon	פרפרניים	Fabaceae	1		1	1	1mm+			2 פסיגים
SVT-6	Shivta	Tepper, Bar-Oz and Gini	Daniel Fuks	2016-2017	E	501	5111	Yes	3		3	חיטה/שעורה	Hordeum/Triticum	גרגיר	grain	דגניים	Gramineae	9	4	13	13	1+	2
SVT-6	Shivta	Tepper, Bar-Oz and Gini	Daniel Fuks	2016-2017	E	501	5111	Yes	3		4			פרק גבעול	culm node	דגניים	Gramineae	29		29		1+
SVT-6	Shivta	Tepper, Bar-Oz and Gini	Daniel Fuks	2016-2017	E	501	5111	Yes	3		5			שורשים	roots	דגניים	Gramineae	2		2		1+
SVT-6	Shivta	Tepper, Bar-Oz and Gini	Daniel Fuks	2016-2017	E	501	5111	Yes	3		6			שברי גלומה ומלען	glume and awn fragments	דגניים	Gramineae					1+
SVT-22	Shivta	Tepper, Bar-Oz and Gini	Daniel Fuks	2016-2017	E	511	5084	Yes	3		8	בקיית הכרשינה	Vicia ervilia	זרע	seed	פרפרניים	Fabaceae		1				2
SVT-6	Shivta	Tepper, Bar-Oz and Gini	Daniel Fuks	2016-2017	E	501	5111	Yes	3		8	דגני		חלקי שדרה	rachis segment	דגניים	Gramineae	1		1		1+
SVT-6	Shivta	Tepper, Bar-Oz and Gini	Daniel Fuks	2016-2017	E	501	5111	Yes	3		9	דגני להגדרה		גרגיר	grain	דגניים	Gramineae	1		1		1+
SVT-6	Shivta	Tepper, Bar-Oz and Gini	Daniel Fuks	2016-2017	E	501	5111	Yes	3		10			שברי גרגיר	grain fragments	דגניים	Gramineae					1+
SVT-6	Shivta	Tepper, Bar-Oz and Gini	Daniel Fuks	2016-2017	E	501	5111	Yes	3		11	דגני להגדרה		גרגיר	grain	דגניים	Gramineae	1		1		1+
SVT-3	Shivta	Tepper, Bar-Oz and Gini	Daniel Fuks	2016-2017	E	501	5097	Yes	3	2	34	בקיית הכרשינה	Vicia ervilia	זרע	seed	פרפרניים	Fabaceae	1		1	1	1mm+
SVT-6	Shivta	Tepper, Bar-Oz and Gini	Daniel Fuks	2016-2017	E	501	5111	Yes	3		13	עדשה תרבותית?	Lens culinaris?	זרע	seed	פרפרניים	Fabaceae	1		1		1+
SVT-4	Shivta	Tepper, Bar-Oz and Gini	Daniel Fuks	2016-2017	E	501	5102	Yes	3	2	57	בקיית הכרשינה	Vicia ervilia	זרע	seed	פרפרניים	Fabaceae	8	2	10	10	1mm+	2
SVT-5	Shivta	Tepper, Bar-Oz and Gini	Daniel Fuks	2016-2017	E	501	5110	Yes	3		15	בקיית הכרשינה	Vicia ervilia	זרע	seed	פרפרניים	Fabaceae	22	6	28	28	1+	2
SVT-6	Shivta	Tepper, Bar-Oz and Gini	Daniel Fuks	2016-2017	E	501	5111	Yes	3		16	קטניות בלתי		פסיגים ושברים	cotyleda and fragments	פרפרניים	Fabaceae	5	1	5		1+	2		כל פסיג נספר כחצי, בניגוד לקודם
SVT-6	Shivta	Tepper, Bar-Oz and Gini	Daniel Fuks	2016-2017	E	501	5111	Yes	3		17	פרפרני קטן		זרע	seed	פרפרניים	Fabaceae	1		1		1+
SVT-5	Shivta	Tepper, Bar-Oz and Gini	Daniel Fuks	2016-2017	E	501	5110	Yes	3		16	בקיית הכרשינה	Vicia ervilia	פסיג	cotyledon	פרפרניים	Fabaceae	6	2	6	8	1+	2		equivalent to 3 seeds
SVT-6	Shivta	Tepper, Bar-Oz and Gini	Daniel Fuks	2016-2017	E	501	5111	Yes	3		14	בקיית הכרשינה	Vicia ervilia	זרע	seed	פרפרניים	Fabaceae	22	2	24	24	1+	2
SVT-6	Shivta	Tepper, Bar-Oz and Gini	Daniel Fuks	2016-2017	E	501	5111	Yes	3		15	בקיית הכרשינה	Vicia ervilia	פסיג	cotyledon	פרפרניים	Fabaceae	6	1	7	7	1+	2		שווה ערך ל-3 זרעים
SVT-6	Shivta	Tepper, Bar-Oz and Gini	Daniel Fuks	2016-2017	E	501	5111	Yes	3		21	ששן מאפיר?	Caylusea hexagyna?	זרע	seed	רכפתיים	Resedaceae					1+
SVT-7	Shivta	Tepper, Bar-Oz and Gini	Daniel Fuks	2016-2018	E	501	5118	Yes	3		16	בקיית הכרשינה	Vicia ervilia	זרע	seed	פרפרניים	Fabaceae	5	1	6	6	1+	2
SVT-6	Shivta	Tepper, Bar-Oz and Gini	Daniel Fuks	2016-2017	E	501	5111	Yes	3		23	גפן?	Vitis vinifera?	קליפה	peel	גפניים?	Vitaceae?					1+	2
SVT-6	Shivta	Tepper, Bar-Oz and Gini	Daniel Fuks	2016-2017	E	501	5111	Yes	3		24	בלתי							2			1+	2		לחזור לזה
SVT-6	Shivta	Tepper, Bar-Oz and Gini	Daniel Fuks	2016-2017	E	501	5111	Yes	3		25	גלל		שברי גלל								1+	2
SVT-6	Shivta	Tepper, Bar-Oz and Gini	Daniel Fuks	2016-2017	E	501	5111	Yes	3		26	בלתי-שונות										1+	2
SVT-7	Shivta	Tepper, Bar-Oz and Gini	Daniel Fuks	2016-2018	E	501	5118	Yes	3		17	בקיית הכרשינה	Vicia ervilia	פסיג	cotyledon	פרפרניים	Fabaceae	2	2	4	4	1+	2		שווה ערך ל-2
SVT-4	Shivta	Tepper, Bar-Oz and Gini	Daniel Fuks	2016-2017	E	501	5102	Yes	3	2	60	בקיה תרבותית	Vicia sativa	זרע	seed	פרפרניים	Fabaceae	1		1		1mm+
SVT-7	Shivta	Tepper, Bar-Oz and Gini	Daniel Fuks	2016-2018	E	501	5118	Yes	3		3	חיטה/שעורה	Hordeum/Triticum	גרגיר	grain	דגניים	Gramineae	6	4	10	10	2	2
SVT-4	Shivta	Tepper, Bar-Oz and Gini	Daniel Fuks	2016-2017	E	501	5102	Yes	3	2	61	בקיה/טופח	Vicia/Lathyrus	טבורית	hilum	פרפרניים	Fabaceae	1		1		1mm+
SVT-7	Shivta	Tepper, Bar-Oz and Gini	Daniel Fuks	2016-2018	E	501	5118	Yes	3		5	גפן?	Vitis vinifera?	צימוק?	raisin?	?גפניים	Vitaceae?	1		1		1+
SVT-1	Shivta	Tepper, Bar-Oz and Gini	Daniel Fuks	2016-2017	E	500	5003	Yes	3	3	3	גפן	Vitis vinifera	חרצן	pip	גפניים	Vitaceae	1		1	1	2mm			MNI=2
SVT-1	Shivta	Tepper, Bar-Oz and Gini	Daniel Fuks	2016-2017	E	500	5003	Yes	3	3	4	גפן	Vitis vinifera	פרח	flower	גפניים	Vitaceae	1		1		1mm+			mineralized?
SVT-10	Shivta	Tepper, Bar-Oz and Gini	Daniel Fuks	2016-2018	E	503	5016	Yes	3		22	גפן	Vitis vinifera	עוקץ	pedicel			1		1	1	1
SVT-11	Shivta	Tepper, Bar-Oz and Gini	Daniel Fuks	2016-2018	E	503	5018	Yes	3		4	גפן	Vitis vinifera	חרצן	Vitis vinifera	גפניים	Vitaceae	1		1	1	2
SVT-12	Shivta	Tepper, Bar-Oz and Gini	Daniel Fuks	2016-2018	E	503	5019	Yes	3		4	גפן	Vitis vinifera	חרצן	Vitis vinifera	גפניים	Vitaceae	1	1	2	2	2	2
SVT-7	Shivta	Tepper, Bar-Oz and Gini	Daniel Fuks	2016-2018	E	501	5118	Yes	3		11	חיטה/שעורה	Hordeum/Triticum	חלקי שדרה	rachis segment	דגניים	Gramineae	2		2		1+
SVT-7	Shivta	Tepper, Bar-Oz and Gini	Daniel Fuks	2016-2018	E	501	5118	Yes	3		12			פרק גבעול	culm node	דגניים	Gramineae	83	8	83		1+	2
SVT-7	Shivta	Tepper, Bar-Oz and Gini	Daniel Fuks	2016-2018	E	501	5118	Yes	3		13			שורשים	roots	דגניים	Gramineae	6		6		1+
SVT-7	Shivta	Tepper, Bar-Oz and Gini	Daniel Fuks	2016-2018	E	501	5118	Yes	3		14			שברי גלומה ומלען	glume and awn fragments	דגניים	Gramineae					1+
SVT-7	Shivta	Tepper, Bar-Oz and Gini	Daniel Fuks	2016-2018	E	501	5118	Yes	3		15			שברי גרגיר	grain fragments	דגניים	Gramineae					1+
SVT-13	Shivta	Tepper, Bar-Oz and Gini				503	5039				42	גפן	Vitis vinifera	שברי חרצן	pip fragment			2		2	2	<2
SVT-140	Shivta	Tepper, Bar-Oz and Gini	Daniel Fuks	2016-2017	E	504	5029	No	3		4	גפן	Vitis vinifera	חרצן	pip	גפניים	Vitaceae			3	3			2
SVT-7	Shivta	Tepper, Bar-Oz and Gini	Daniel Fuks	2016-2018	E	501	5118	Yes	3		18	קטניות בלתי		זרע	seed	פרפרניים	Fabaceae	4		4		1+			כנראה כרשינה
SVT-140	Shivta	Tepper, Bar-Oz and Gini	Daniel Fuks	2016-2017	E	504	5029	No	3		5	גפן	Vitis vinifera	עוקץ	pedicel	גפניים	Vitaceae			2	2			2
SVT-140	Shivta	Tepper, Bar-Oz and Gini	Daniel Fuks	2016-2017	E	504	5029	No	3		21	גפן	Vitis vinifera	חרצן	pip	גפניים	Vitaceae			3	3			1	fragments - counts based on pip ends and MNI
SVT-7	Shivta	Tepper, Bar-Oz and Gini	Daniel Fuks	2016-2018	E	501	5118	Yes	3		21	קחוון?	Anthemis?			מורכבים	Asteraceae					1+
SVT-140	Shivta	Tepper, Bar-Oz and Gini	Daniel Fuks	2016-2017	E	504	5029	No	3		22	גפן	Vitis vinifera	עוקץ	pedicel	גפניים	Vitaceae			3	3			1
SVT-7	Shivta	Tepper, Bar-Oz and Gini	Daniel Fuks	2016-2018	E	501	5118	Yes	3		23	דמומית?	Adonis?					1		1		1+
SVT-7	Shivta	Tepper, Bar-Oz and Gini	Daniel Fuks	2016-2018	E	501	5118	Yes	3		24	בלתי - ליואל						1		1		1+
SVT-7	Shivta	Tepper, Bar-Oz and Gini	Daniel Fuks	2016-2018	E	501	5118	Yes	3		25	זמזומית? דבקה?						1		1		1+
SVT-7	Shivta	Tepper, Bar-Oz and Gini	Daniel Fuks	2016-2018	E	501	5118	Yes	3		26	בלתי-שונות							2			1+
SVT-7	Shivta	Tepper, Bar-Oz and Gini	Daniel Fuks	2016-2018	E	501	5118	Yes	3		27	גלל						1	2	1		1+
SVT-15	Shivta	Tepper, Bar-Oz and Gini	Daniel Fuks	2016-2017	E	505	5031	Yes	3	3	4	גפן	Vitis vinifera	חרצן	pip	גפניים	Vitaceae	2		2	2	2
SVT-7	Shivta	Tepper, Bar-Oz and Gini	Daniel Fuks	2016-2018	E	501	5118	Yes	3		29	אספסת	Medicago	תרמי	pod	פרפרניים	Fabaceae		1				2
SVT-15	Shivta	Tepper, Bar-Oz and Gini	Daniel Fuks	2016-2017	E	505	5031	Yes	3	3	5	גפן	Vitis vinifera	עוקץ	pedicel	גפניים	Vitaceae	1		1		1+
SVT-15	Shivta	Tepper, Bar-Oz and Gini	Daniel Fuks	2016-2017	E	505	5031	Yes	3	1	6	גפן	Vitis vinifera	קליפה	skin	גפניים	Vitaceae					1+	2
SVT-7	Shivta	Tepper, Bar-Oz and Gini				501	5118				32	אשל?		ענף	twig				2
SVT-7	Shivta	Tepper, Bar-Oz and Gini				501	5118				33	חוט סיבי עז?							1				2
SVT-7	Shivta	Tepper, Bar-Oz and Gini				501	5118				34	למיון											2
SVT-7	Shivta	Tepper, Bar-Oz and Gini				501	5118				35	למיון							3				2		דגניים קטנים +
SVT-17	Shivta	Tepper, Bar-Oz and Gini	Daniel Fuks	2016-2017	E	507	5133	Yes	1.5		1	גפן	Vitis vinifera	חרצן	pip	גפניים	Vitaceae	24	1	25	25	2	2
SVT-17	Shivta	Tepper, Bar-Oz and Gini	Daniel Fuks	2016-2017	E	507	5133	Yes	1.5		2	גפן	Vitis vinifera	קליפה	skin	גפניים	Vitaceae					1+
SVT-8	Shivta	Tepper, Bar-Oz and Gini	Daniel Fuks	2016-2018	E	502	5010	Yes	3		3	חיטה/שעורה	Hordeum/Triticum	חלקי שדרה	rachis segment	דגניים	Gramineae	4		4		0.3+
SVT-8	Shivta	Tepper, Bar-Oz and Gini	Daniel Fuks	2016-2018	E	502	5010	Yes	3		4			פרק גבעול	culm node	דגניים	Gramineae	1		1		0.3+
SVT-8	Shivta	Tepper, Bar-Oz and Gini	Daniel Fuks	2016-2018	E	502	5010	Yes	3		5			שברי גלומה ומלען	glume and awn fragments	דגניים	Gramineae					0.3+
SVT-8	Shivta	Tepper, Bar-Oz and Gini	Daniel Fuks	2016-2018	E	502	5010	Yes	3		6	גרגרנית ערבית??		זרע	seed	פרפרניים	Fabaceae	1		1		0.3+
SVT-8	Shivta	Tepper, Bar-Oz and Gini	Daniel Fuks	2016-2018	E	502	5010	Yes	3		7	פרפרני קטן		זרע	seed	פרפרניים	Fabaceae	8		8		0.3+
SVT-8	Shivta	Tepper, Bar-Oz and Gini	Daniel Fuks	2016-2018	E	502	5010	Yes	3		8	דגני		גרגיר	grain	דגניים	Gramineae	2		2		0.3+
SVT-8	Shivta	Tepper, Bar-Oz and Gini	Daniel Fuks	2016-2018	E	502	5010	Yes	3		9	תלתן		זרע	seed	פרפרניים	Fabaceae	1		1		0.3+
SVT-2	Shivta	Tepper, Bar-Oz and Gini	Daniel Fuks	2016-2017	E	501	5006	Yes	3	3	4	גפן	Vitis vinifera	חרצן	pip	גפניים	Vitaceae	1		1	1	1
SVT-8	Shivta	Tepper, Bar-Oz and Gini	Daniel Fuks	2016-2018	E	502	5010	Yes	3		11	לחך הנגב/משונן?						3		3		0.3+
SVT-27	Shivta	Tepper, Bar-Oz and Gini	Daniel Fuks	2016-2017	E	516	5130	Yes	3		3	גפן	Vitis vinifera	חרצן	pip	גפניים	Vitaceae	9		9	9	2
SVT-8	Shivta	Tepper, Bar-Oz and Gini	Daniel Fuks	2016-2018	E	502	5010	Yes	3		13	כף-אווז						2		2		0.3+			השלישי גם או ספרגולה?
SVT-4	Shivta	Tepper, Bar-Oz and Gini	Daniel Fuks	2016-2017	E	501	5102	Yes	3	3	74	גפן	Vitis vinifera	חרצן	pip	גפניים	Vitaceae	2		2	2	2
SVT-8	Shivta	Tepper, Bar-Oz and Gini	Daniel Fuks	2016-2018	E	502	5010	Yes	3		15	ששן מאפיר?						3		3		0.3+
SVT-8	Shivta	Tepper, Bar-Oz and Gini	Daniel Fuks	2016-2018	E	502	5010	Yes	3		16	אשל						3		3		0.3+
SVT-4	Shivta	Tepper, Bar-Oz and Gini	Daniel Fuks	2016-2017	E	501	5102	Yes	3	3	75	גפן	Vitis vinifera	עוקץ	pedicel	גפניים	Vitaceae	1		1		1+
SVT-4	Shivta	Tepper, Bar-Oz and Gini	Daniel Fuks	2016-2017	E	501	5102	Yes	3		253	גפן	Vitis vinifera	קליפה	skin	גפניים	Vitaceae		1				2
SVT-8	Shivta	Tepper, Bar-Oz and Gini	Daniel Fuks	2016-2018	E	502	5010	Yes	3		19	להגדרה בהמשך										0.3+
SVT-8	Shivta	Tepper, Bar-Oz and Gini	Daniel Fuks	2016-2018	E	502	5010	Yes	3		20	למיון										0.3+
SVT-5	Shivta	Tepper, Bar-Oz and Gini	Daniel Fuks	2016-2017	E	501	5110	Yes	3		4	גפן	Vitis vinifera	חרצן	pip	גפניים	Vitaceae	2	1	3	3	2	2
SVT-9	Shivta	Tepper, Bar-Oz and Gini	Daniel Fuks	2016-2018	E	502	5014	Yes	3		2	חיטה?	Triticum sp.?	גרגיר	grain	דגניים	Gramineae	2		2		1+
SVT-7	Shivta	Tepper, Bar-Oz and Gini	Daniel Fuks	2016-2018	E	501	5118	Yes	3		4	גפן	Vitis vinifera	חרצן	pip	גפניים	Vitaceae	10	3	13	13	2	2
SVT-9	Shivta	Tepper, Bar-Oz and Gini	Daniel Fuks	2016-2018	E	502	5014	Yes	3		4			פרק גבעול	culm node	דגניים	Gramineae	1		1		1+
SVT-9	Shivta	Tepper, Bar-Oz and Gini	Daniel Fuks	2016-2018	E	502	5014	Yes	3		5			שברי גלומה ומלען	glume and awn fragments	דגניים	Gramineae					1+
SVT-9	Shivta	Tepper, Bar-Oz and Gini	Daniel Fuks	2016-2018	E	502	5014	Yes	3		6			שברי גרגיר	grain fragments	דגניים	Gramineae					1+
SVT-7	Shivta	Tepper, Bar-Oz and Gini	Daniel Fuks	2016-2018	E	501	5118	Yes	3		6	גפן	Vitis vinifera	עוקץ	pedicel	גפניים	Vitaceae	2	5	2		1+	2
SVT-7	Shivta	Tepper, Bar-Oz and Gini	Daniel Fuks	2016-2018	E	501	5118	Yes	3		7	גפן	Vitis vinifera	קליפה	peel	גפניים	Vitaceae					1+	2
SVT-9	Shivta	Tepper, Bar-Oz and Gini	Daniel Fuks	2016-2018	E	502	5014	Yes	3		9			חלקי שדרה	rachis segment	דגניים	Gramineae	3		3		1+
SVT-9	Shivta	Tepper, Bar-Oz and Gini	Daniel Fuks	2016-2018	E	502	5014	Yes	3		10	דגני להגדרה		גרגיר	grain	דגניים	Gramineae	3		3		1+
SVT-9	Shivta	Tepper, Bar-Oz and Gini	Daniel Fuks	2016-2018	E	502	5014	Yes	3		3	גפן	Vitis vinifera	חרצן	pip	גפניים	Vitaceae	1		1	1	1
SVT-9	Shivta	Tepper, Bar-Oz and Gini	Daniel Fuks	2016-2018	E	502	5014	Yes	3		12	ליואל										1+
SVT-9	Shivta	Tepper, Bar-Oz and Gini	Daniel Fuks	2016-2018	E	502	5014	Yes	3		13	ליואל										1+
SVT-9	Shivta	Tepper, Bar-Oz and Gini	Daniel Fuks	2016-2018	E	502	5014	Yes	3		14	שונות למיון										1+
																						<2
																						<2
																						<2
																						<2
																						<2
																						<2
																						<2
																						<2
																						<2
																						<2
																						<2
																						<2
																						<2
																						<2
																						<2
																				6418

## Sheet: שטח F
Lab #	Site	Excavator	Archaeobotanist	Year analyzed	Area	Locus	Basket	Vial no.	מין הצמח	Plant Latin name	איבר	Organ	משפחה	Family	Quantity	Notes
SVT-171	Shivta	Tepper, Bar-Oz and Gini	Daniel Fuks	2016 & 2019	F	601	6004	1	שעורה	Hordeum vulgare	גרגיר	grain	דגניים	Gramineae	1
SVT-171	Shivta	Tepper, Bar-Oz and Gini	Daniel Fuks	2016 & 2019	F	601	6004	2	שעורה	Hordeum sp.	פרק ציר שיבולת	rachis fragment	דגניים	Gramineae	1
SVT-171	Shivta	Tepper, Bar-Oz and Gini	Daniel Fuks	2016 & 2019	F	601	6004	3	דגני	Gramineae	פרק ציר שיבולת	rachis fragment	דגניים	Gramineae	1
SVT-171	Shivta	Tepper, Bar-Oz and Gini	Daniel Fuks	2016 & 2019	F	601	6004	4	תלתן?	cf. Trifolium	זרע	seed	פרפרניים	Fabaceae	1	פרפרני קטן
SVT-171	Shivta	Tepper, Bar-Oz and Gini	Daniel Fuks	2016 & 2019	F	601	6004	5	רכפה מגובששת?	cf. Reseda muricata	זרע	seed	רכפתיים	Resedaceae	1	בסוף, להשוות את כל הרכפה שאצלי
SVT-171	Shivta	Tepper, Bar-Oz and Gini	Daniel Fuks	2016 & 2019	F	601	6004	6	חלמית	Malva sp.	פרודה	mericarp	חלמתיים	Malvaceae	7	לא מפוחם, כנראה רצנטי
SVT-171	Shivta	Tepper, Bar-Oz and Gini	Daniel Fuks	2016 & 2019	F	601	6004	7	מלוח	Atriplex	זרע	seed	סלקיים	Chenopodiaceae	4	לא מפוחם, כנראה רצנטי
SVT-171	Shivta	Tepper, Bar-Oz and Gini	Daniel Fuks	2016 & 2019	F	601	6004	8	דורית רפה	Spergula fallax	זרע	seed	ציפורניים	Caryophyllaceae	5	לא מפוחם, כנראה רצנטי
SVT-171	Shivta	Tepper, Bar-Oz and Gini	Daniel Fuks	2016 & 2019	F	601	6004	9	חיעד ספרדי	Aizoon hispanicum	זרע	seed	חיעדיים	Aizoaceae	3	לא מפוחם, כנראה רצנטי
SVT-171	Shivta	Tepper, Bar-Oz and Gini	Daniel Fuks	2016 & 2019	F	601	6004	10	אהל מצוי	Mesembryanthemum nodiflorum	זרע	seed	חיעדיים	Aizoaceae	מאות	לא מפוחם, כנראה רצנטי
SVT-171	Shivta	Tepper, Bar-Oz and Gini	Daniel Fuks	2016 & 2019	F	601	6004	11	שונות							לא מפוחם, כנראה רצנטי
SVT-171	Shivta	Tepper, Bar-Oz and Gini	Daniel Fuks	2016 & 2019	F	601	6004	12	בלתי- שונות							מפוחם

## Sheet: שטח G
Lab #	Site	Excavator	Archaeobotanist	Year analyzed	Area	Locus	Basket	Vial no.	מין הצמח	Plant Latin name	איבר	Organ	משפחה	family	Quantity	Notes
SVT-172	Shivta	Tepper, Bar-Oz and Gini	Daniel Fuks	2016 & 2019	G	707	7025	1	שעורה	Hordeum vulgare	גרגיר	grain	דגניים	Gramineae	4
SVT-172	Shivta	Tepper, Bar-Oz and Gini	Daniel Fuks	2016 & 2019	G	707	7025	2	שעורה?	Hordeum?	גרגיר	grain	דגניים	Gramineae	1	לא מפוחמת אך נראית קדומה
SVT-172	Shivta	Tepper, Bar-Oz and Gini	Daniel Fuks	2016 & 2019	G	707	7025	3	חיטה	Triticum sp.	גרגיר	grain	דגניים	Gramineae	8
SVT-172	Shivta	Tepper, Bar-Oz and Gini	Daniel Fuks	2016 & 2019	G	707	7025	4	שברי דגן		גרגיר	grain	דגניים	Gramineae		לא נספר
SVT-172	Shivta	Tepper, Bar-Oz and Gini	Daniel Fuks	2016 & 2019	G	707	7025	5	שעורה שש-טורית	Hordeum vulgare hexastichum	פרק ציר שיבולת	rachis fragment	דגניים	Gramineae	2	אחת לא מפוחמת אך נראית קדומה
SVT-172	Shivta	Tepper, Bar-Oz and Gini	Daniel Fuks	2016 & 2019	G	707	7025	6	שעורה דו-טורית	Hordeum vulgare distichum	פרק ציר שיבולת	rachis fragment	דגניים	Gramineae	9	אחת לא מפוחמת אך נראית קדומה
SVT-172	Shivta	Tepper, Bar-Oz and Gini	Daniel Fuks	2016 & 2019	G	707	7025	7	שעורה	Hordeum vulgare	פרק ציר שיבולת	rachis fragment	דגניים	Gramineae	8
SVT-172	Shivta	Tepper, Bar-Oz and Gini	Daniel Fuks	2016 & 2019	G	707	7025	8	חיטת הלחם	Triticum aestivum s.l.	פרק ציר שיבולת	rachis fragment	דגניים	Gramineae	12
SVT-172	Shivta	Tepper, Bar-Oz and Gini	Daniel Fuks	2016 & 2019	G	707	7025	9	חיטת הלחם	Triticum aestivum s.l.	פרק ראשון	first rachis	דגניים	Gramineae	1
SVT-172	Shivta	Tepper, Bar-Oz and Gini	Daniel Fuks	2016 & 2019	G	707	7025	10	חיטה טטרפלוידית	Triticum turgidum s.l.	פרק ציר שיבולת	rachis fragment	דגניים	Gramineae	1
SVT-172	Shivta	Tepper, Bar-Oz and Gini	Daniel Fuks	2016 & 2019	G	707	7025	11	דגני	Gramineae	פרק ציר שיבולת	rachis fragment	דגניים	Gramineae	14
SVT-172	Shivta	Tepper, Bar-Oz and Gini	Daniel Fuks	2016 & 2019	G	707	7025	12	דגני	Gramineae	גרגיר	grain	דגניים	Gramineae	3
SVT-172	Shivta	Tepper, Bar-Oz and Gini	Daniel Fuks	2016 & 2019	G	707	7025	13	זון אשון/רב-שנתי?	cf. Lolium rigidum/perenne	גרגיר	grain	דגניים	Gramineae	2	למדוד ולהגדיר בסוף
SVT-172	Shivta	Tepper, Bar-Oz and Gini	Daniel Fuks	2016 & 2019	G	707	7025	14	דגני	Gramineae	שברי מלען וגלומה	awn fragment& glume	דגניים	Gramineae
SVT-172	Shivta	Tepper, Bar-Oz and Gini	Daniel Fuks	2016 & 2019	G	707	7025	15	עוקצר מצוי?	cf. Brachypodium distachyon			דגניים	Gramineae	1	למדוד ולהגדיר בסוף
SVT-172	Shivta	Tepper, Bar-Oz and Gini	Daniel Fuks	2016 & 2019	G	707	7025	16	יבלית מצויה	Cynodon dactylon	גרגיר	grain	דגניים	Gramineae	1
SVT-172	Shivta	Tepper, Bar-Oz and Gini	Daniel Fuks	2016 & 2019	G	707	7025	17	עדשה תרבותית	Lens culinaris	זרע	seed	פרפרניים	Fabaceae	1	מתאים בגודל, צורה, שורשון
SVT-172	Shivta	Tepper, Bar-Oz and Gini	Daniel Fuks	2016 & 2019	G	707	7025	18	פרפרני קטן	Fabaceae	זרע	seed	פרפרניים	Fabaceae	4	תלתן?
SVT-172	Shivta	Tepper, Bar-Oz and Gini	Daniel Fuks	2016 & 2019	G	707	7025	19	גרגרנית ערבית	Trigonella arabica	זרע	seed	פרפרניים	Fabaceae	4
SVT-172	Shivta	Tepper, Bar-Oz and Gini	Daniel Fuks	2016 & 2019	G	707	7025	20	בן-שלח מנוצה	Erucaria microcarpa	תרמיל	pod	מצליבים	Brassicaceae	1
SVT-172	Shivta	Tepper, Bar-Oz and Gini	Daniel Fuks	2016 & 2019	G	707	7025	21	אהל מצוי	Mesembryanthemum nodiflorum	זרע	seed	חיעדיים	Aizoaceae		לא מפוחם, כנראה רצנטי
SVT-172	Shivta	Tepper, Bar-Oz and Gini	Daniel Fuks	2016 & 2019	G	707	7025	22	חלמית קטנת פרחים/חדת אונות-	Malva parviflora/oxyloba	זרע	seed	חלמתיים	Malvaceae	1
SVT-172	Shivta	Tepper, Bar-Oz and Gini	Daniel Fuks	2016 & 2019	G	707	7025	23	מתנן שעיר	Thymelaea hirsuta	עלה	leaf	מתנניים	Thymelaeaceae	2
SVT-172	Shivta	Tepper, Bar-Oz and Gini	Daniel Fuks	2016 & 2019	G	707	7025	24	קחוון?	Anthemis?	זרעון	achene	מורכבים	Asteraceae	1
SVT-172	Shivta	Tepper, Bar-Oz and Gini	Daniel Fuks	2016 & 2019	G	707	7025	25	גלעינית זעירת פרחים	Buglossoides tenuiflora	זרע	seed	זיפניים	Boraginaceae	1	(לא מפוחם)
SVT-172	Shivta	Tepper, Bar-Oz and Gini	Daniel Fuks	2016 & 2019	G	707	7025	26	cf. מלעניאל מצוי	cf. Stipa capensis	גרגיר	grain	דגניים	Gramineae	1	עמ' 132 במח' 2
SVT-172	Shivta	Tepper, Bar-Oz and Gini	Daniel Fuks	2016 & 2019	G	707	7025	27	קוטנדיה מצרית/מדוקרנת	Cutandia memphitica/dichotoma
SVT-172	Shivta	Tepper, Bar-Oz and Gini	Daniel Fuks	2016 & 2019	G	707	7025	28	שום???	Allium???	בצלצול???				1	להמשך
SVT-172	Shivta	Tepper, Bar-Oz and Gini	Daniel Fuks	2016 & 2019	G	707	7025	29	חלמית אכולה??						2	להמשך
SVT-172	Shivta	Tepper, Bar-Oz and Gini	Daniel Fuks	2016 & 2019	G	707	7025	30	בלתי-שונות להמשך
SVT-172	Shivta	Tepper, Bar-Oz and Gini	Daniel Fuks	2016 & 2019	G	707	7025	31	בלתי-שונות
SVT-173	Shivta	Tepper, Bar-Oz and Gini	Daniel Fuks	2016 & 2019	G	708	7029	1	חיטה טטרפלוידית	Triticum turgidum s.l.	פרק ציר שיבולת	rachis fragment	דגניים	Gramineae	1	לא מפוחם
SVT-173	Shivta	Tepper, Bar-Oz and Gini	Daniel Fuks	2016 & 2019	G	708	7029	2	חיטת הלחם	Triticum aestivum s.l.	פרק ציר שיבולת ופרק ראשון	rachis fragment& first rachis	דגניים	Gramineae	1	3 פרקים+ פרק ראשון
SVT-173	Shivta	Tepper, Bar-Oz and Gini	Daniel Fuks	2016 & 2019	G	708	7029	3	חיטה/שעורה cf.	cf. Hordeum/Triticum	גרגיר	grain	דגניים	Gramineae	1
SVT-173	Shivta	Tepper, Bar-Oz and Gini	Daniel Fuks	2016 & 2019	G	708	7029	4	דגני	Gramineae	גרגיר	grain	דגניים	Gramineae	1
SVT-173	Shivta	Tepper, Bar-Oz and Gini	Daniel Fuks	2016 & 2019	G	708	7029	5	דגני	Gramineae	פרק ציר שיבולת	rachis fragment	דגניים	Gramineae	1	לא מפוחם
SVT-173	Shivta	Tepper, Bar-Oz and Gini	Daniel Fuks	2016 & 2019	G	708	7029	6	דגני	Gramineae	שברי מלען	awn fragment	דגניים	Gramineae	9
SVT-173	Shivta	Tepper, Bar-Oz and Gini	Daniel Fuks	2016 & 2019	G	708	7029	7	בקיים להגדרה	Vicieae	זרע	seed	פרפרניים	Fabaceae	1
SVT-173	Shivta	Tepper, Bar-Oz and Gini	Daniel Fuks	2016 & 2019	G	708	7029	8	גרגרנית/תלתן	Trigonella/ Trifolium	זרע	seed	פרפרניים	Fabaceae	1
SVT-173	Shivta	Tepper, Bar-Oz and Gini	Daniel Fuks	2016 & 2019	G	708	7029	9	אהל מצוי-רצנטי	Mesembryanthemum nodiflorum	זרע	seed	חיעדיים	Aizoaceae	עשרות	לא מפוחם
SVT-173	Shivta	Tepper, Bar-Oz and Gini	Daniel Fuks	2016 & 2019	G	708	7029	10	מתנן שעיר	Thymelaea hirsuta	עלה	leaf	מתנניים	Thymelaeaceae	1	לא מפוחם
SVT-173	Shivta	Tepper, Bar-Oz and Gini	Daniel Fuks	2016 & 2019	G	708	7029	11	מלוח?	Atriplex?	זרע	seed	סלקיים	Chenopodiaceae	5
SVT-173	Shivta	Tepper, Bar-Oz and Gini	Daniel Fuks	2016 & 2019	G	708	7029	12	רכפה?						1
SVT-173	Shivta	Tepper, Bar-Oz and Gini	Daniel Fuks	2016 & 2019	G	708	7029	13	שונות ליואל						4
SVT-173	Shivta	Tepper, Bar-Oz and Gini	Daniel Fuks	2016 & 2019	G	708	7029	14	שבר גלל						1	שבר קטן
SVT-173	Shivta	Tepper, Bar-Oz and Gini	Daniel Fuks	2016 & 2019	G	708	7029	15	חרק							לא נספר
SVT-173	Shivta	Tepper, Bar-Oz and Gini	Daniel Fuks	2016 & 2019	G	708	7029	16	בלתי-שונות							לא נספר
SVT-174	Shivta	Tepper, Bar-Oz and Gini	Daniel Fuks	2016 & 2019	G	711	7034	1	שעורה	Hordeum vulgare	גרגיר	grain	דגניים	Gramineae	6
SVT-174	Shivta	Tepper, Bar-Oz and Gini	Daniel Fuks	2016 & 2019	G	711	7034	2	חיטה	Triticum sp.	גרגיר	grain	דגניים	Gramineae	6
SVT-174	Shivta	Tepper, Bar-Oz and Gini	Daniel Fuks	2016 & 2019	G	711	7034	3	חיטה/שעורה	Hordeum/Triticum	גרגיר	grain	דגניים	Gramineae	2
SVT-174	Shivta	Tepper, Bar-Oz and Gini	Daniel Fuks	2016 & 2019	G	711	7034	4	דגני	Gramineae	גרגיר	grain	דגניים	Gramineae	1
SVT-174	Shivta	Tepper, Bar-Oz and Gini	Daniel Fuks	2016 & 2019	G	711	7034	5	דגני להגדרה	Gramineae	גרגיר	grain	דגניים	Gramineae	1
SVT-174	Shivta	Tepper, Bar-Oz and Gini	Daniel Fuks	2016 & 2019	G	711	7034	6	שעורה שש-טורית	Hordeum vulgare hexastichum	פרק ציר שיבולת	rachis fragment	דגניים	Gramineae	1
SVT-174	Shivta	Tepper, Bar-Oz and Gini	Daniel Fuks	2016 & 2019	G	711	7034	7	שעורה דו-טורית/שעורת התבור	Hordeum vulgare disticum/ spontaneum	פרק ציר שיבולת	rachis fragment	דגניים	Gramineae	4	כולל אחד עם 4 פרקים
SVT-174	Shivta	Tepper, Bar-Oz and Gini	Daniel Fuks	2016 & 2019	G	711	7034	8	שעורה	Hordeum vulgare	פרק ציר שיבולת	rachis fragment	דגניים	Gramineae	1
SVT-174	Shivta	Tepper, Bar-Oz and Gini	Daniel Fuks	2016 & 2019	G	711	7034	9	חיטה טטרפלוידית	Triticum turgidum s.l.	פרק ציר שיבולת	rachis fragment	דגניים	Gramineae	7
SVT-174	Shivta	Tepper, Bar-Oz and Gini	Daniel Fuks	2016 & 2019	G	711	7034	10	חיטה טטרפלוידית	Triticum turgidum s.l.	פרק ראשון	first rachis	דגניים	Gramineae	2
SVT-174	Shivta	Tepper, Bar-Oz and Gini	Daniel Fuks	2016 & 2019	G	711	7034	11	חיטה?	cf. Triticum	פרק ציר שיבולת	rachis fragment	דגניים	Gramineae	1
SVT-174	Shivta	Tepper, Bar-Oz and Gini	Daniel Fuks	2016 & 2019	G	711	7034	12	דגני	Gramineae	פרק ציר שיבולת	rachis fragment	דגניים	Gramineae	10
SVT-174	Shivta	Tepper, Bar-Oz and Gini	Daniel Fuks	2016 & 2019	G	711	7034	13	חיטה/שעורה	Hordeum/Triticum	פרקי גבעול	culm node	דגניים	Gramineae	5
SVT-174	Shivta	Tepper, Bar-Oz and Gini	Daniel Fuks	2016 & 2019	G	711	7034	14	חיטה/שעורה	Hordeum/Triticum	שורש דגן	culm root	דגניים	Gramineae	3
SVT-174	Shivta	Tepper, Bar-Oz and Gini	Daniel Fuks	2016 & 2019	G	711	7034	15	זון	Lolium sp.	פרק ציר שיבולת	rachis fragment	דגניים	Gramineae	1
SVT-174	Shivta	Tepper, Bar-Oz and Gini	Daniel Fuks	2016 & 2019	G	711	7034	16	דגני	Gramineae	שברי מלען וגלומה	awn fragment& glume	דגניים	Gramineae	4	מלען אחד ו3 שברי גלומה
SVT-174	Shivta	Tepper, Bar-Oz and Gini	Daniel Fuks	2016 & 2019	G	711	7034	17	דגני? יבלית?	Gramineae? Cynodon?	גרגיר	grain	?דגניים	Gramineae?	3
SVT-174	Shivta	Tepper, Bar-Oz and Gini	Daniel Fuks	2016 & 2019	G	711	7034	18	פרפרני קטן	Fabaceae	זרע	seed	פרפרניים	Fabaceae	4
SVT-174	Shivta	Tepper, Bar-Oz and Gini	Daniel Fuks	2016 & 2019	G	711	7034	19	גרגרנית ערבית?	cf. Trigonella arabica	זרע	seed	פרפרניים	Fabaceae	5
SVT-174	Shivta	Tepper, Bar-Oz and Gini	Daniel Fuks	2016 & 2019	G	711	7034	20	תלתן? ליואל	Trifolium?	זרע	seed	פרפרניים	Fabaceae	1
SVT-174	Shivta	Tepper, Bar-Oz and Gini	Daniel Fuks	2016 & 2019	G	711	7034	21	אהל מצוי	Mesembryanthemum nodiflorum	זרע	seed	חיעדיים	Aizoaceae	עשרות
SVT-174	Shivta	Tepper, Bar-Oz and Gini	Daniel Fuks	2016 & 2019	G	711	7034	22	כף אווז האשפות?	Chenopodium murale?	זרע	seed	סלקיים?	Chenopodiaceae?	5
SVT-174	Shivta	Tepper, Bar-Oz and Gini	Daniel Fuks	2016 & 2019	G	711	7034	23	מתנן שעיר	Thymelaea hirsuta	עלה	leaf	מתנניים	Thymelaeaceae	2
SVT-174	Shivta	Tepper, Bar-Oz and Gini	Daniel Fuks	2016 & 2019	G	711	7034	24	מתנן שעיר	Thymelaea hirsuta	פרי	fruit	מתנניים	Thymelaeaceae	1
SVT-174	Shivta	Tepper, Bar-Oz and Gini	Daniel Fuks	2016 & 2019	G	711	7034	25	קחוון?	Anthemis?	זרעון	achene	מורכבים	Asteraceae	1
SVT-174	Shivta	Tepper, Bar-Oz and Gini	Daniel Fuks	2016 & 2019	G	711	7034	26	פרג/פרגה להגדרה	Papaver/Glaucum	זרע	seed	פרגיים	Papaveraceae	3	לא מפוחם
SVT-174	Shivta	Tepper, Bar-Oz and Gini	Daniel Fuks	2016 & 2019	G	711	7034	27	מצליבים ליואל				מצליבים	Brassicaceae	2
SVT-174	Shivta	Tepper, Bar-Oz and Gini	Daniel Fuks	2016 & 2019	G	711	7034	28	ליואל						1	מלוח?
SVT-174	Shivta	Tepper, Bar-Oz and Gini	Daniel Fuks	2016 & 2019	G	711	7034	29	שונות ליואל						9
SVT-174	Shivta	Tepper, Bar-Oz and Gini	Daniel Fuks	2016 & 2019	G	711	7034	30	גלל						1
SVT-174	Shivta	Tepper, Bar-Oz and Gini	Daniel Fuks	2016 & 2019	G	711	7034	31	חרק להגדרה						1
SVT-174	Shivta	Tepper, Bar-Oz and Gini	Daniel Fuks	2016 & 2019	G	711	7034	32	עצם							לא נספר. חתיכות קטנות
SVT-174	Shivta	Tepper, Bar-Oz and Gini	Daniel Fuks	2016 & 2019	G	711	7034	33	בלתי-שונות							לא נספר

## Sheet: שטח M
Lab #	Site	Excavator	Archaeobotanist	Year analyzed	Area	Locus	Basket	Sediment Volume (liter)	Group	Vial no.	מין הצמח	Plant Latin name	איבר	Organ	Family	משפחה	Quantity Light Fraction	Quantity Heavy Fraction	Quantity calculated	Quantity	Sieve size (mm)	Notes
SVT-28	Shivta	Tepper, Bar-Oz and Gini	Daniel Fuks	2016-2020	M	550	5501	3	1	1	שעורה	Hordeum	גרגיר	grain	Graminae	דגניים	1	1	2	2	2
SVT-28	Shivta	Tepper, Bar-Oz and Gini	Daniel Fuks	2016-2020	M	550	5501	3	1	2	חיטה	Triticum	גרגיר	grain	Graminae	דגניים	2		2		2
SVT-28	Shivta	Tepper, Bar-Oz and Gini	Daniel Fuks	2016-2020	M	550	5501	3	1	3	חיטה/שעורה	Hordeum/Triticum	גרגיר	grain	Graminae	דגניים	3	1	3		2		כמות לחישוב
SVT-28	Shivta	Tepper, Bar-Oz and Gini	Daniel Fuks	2016-2020	M	550	5501	3	3	4	גפן	Vitis vinifera	חרצן	pip	Vitaceae	גפניים	1		1	1	2
SVT-28	Shivta	Tepper, Bar-Oz and Gini	Daniel Fuks	2016-2020	M	550	5501	3	1	5			פרקי דגן	culm node	Graminae	דגניים	10		10		2
SVT-28	Shivta	Tepper, Bar-Oz and Gini	Daniel Fuks	2016-2020	M	550	5501	3	2	6	קטנית		זרע	seed	Fabaceae	פרפרניים	1		1		2	לא להגדרה. אולי לחיבור בהמשך
SVT-28	Shivta	Tepper, Bar-Oz and Gini	Daniel Fuks	2016-2020	M	550	5501	3	2	7	בקיים		זרע	seed	Fabaceae	פרפרניים	1		1		2	שרוף
SVT-28	Shivta	Tepper, Bar-Oz and Gini	Daniel Fuks	2016-2020	M	550	5501	3	3	8	גפן	Vitis vinifera	קליפה	peel	Vitaceae	גפניים					2	heavy+light
SVT-28	Shivta	Tepper, Bar-Oz and Gini	Daniel Fuks	2016-2020	M	550	5501	3	6	9	אמיך קוצני	Emex spinosa	פרי	fruit	Polygonaceae	ארכוביתיים	2		2		2	בשלבי הבשלה שונים
SVT-28	Shivta	Tepper, Bar-Oz and Gini	Daniel Fuks	2016-2020	M	550	5501	3	7	10	בלתי		ענבה	berry			1		1		2	יואל ראה. ענבה מצומקת. אפשר לפתוח ולחפש את הזרע. גם לא כל כך מפוחם
SVT-28	Shivta	Tepper, Bar-Oz and Gini	Daniel Fuks	2016-2020	M	550	5501	3	1	11			שברי גרגיר	grain fragment	Graminae	דגניים					2	heavy+light
SVT-28	Shivta	Tepper, Bar-Oz and Gini	Daniel Fuks	2016-2020	M	550	5501	3	6	12	לשון-פר?	Anchusa?			Boraginaceae	זיפניים	1		1		2	רצנטי?
SVT-28	Shivta	Tepper, Bar-Oz and Gini	Daniel Fuks	2016-2020	M	550	5501	3	7	13	בלתי										2	heavy+light	לא להתעסק
SVT-28	Shivta	Tepper, Bar-Oz and Gini	Daniel Fuks	2016-2020	M	550	5501	3	8	14	גללים										2
SVT-28	Shivta	Tepper, Bar-Oz and Gini	Daniel Fuks	2016-2020	M	550	5501		7	15	רצנטי										2	אפשר בתור בסיס להשוואה
SVT-29	Shivta	Tepper, Bar-Oz and Gini	Daniel Fuks	2016-2020	M	550	5522		1	1	שעורה	Hordeum	גרגיר	grain	Graminae	דגניים	9	1	10	10	2	לבדוק עם יואל
SVT-29	Shivta	Tepper, Bar-Oz and Gini	Daniel Fuks	2016-2020	M	550	5522		1	2	חיטה	Triticum	גרגיר	grain	Graminae	דגניים	1		1		2
SVT-29	Shivta	Tepper, Bar-Oz and Gini	Daniel Fuks	2016-2020	M	550	5522		1	3	חיטה/שעורה	Hordeum/Triticum	גרגיר	grain	Graminae	דגניים	8	1	8		2
SVT-29	Shivta	Tepper, Bar-Oz and Gini	Daniel Fuks	2016-2020	M	550	5522		3	4	גפן	Vitis vinifera	חרצן	pip	Vitaceae	גפניים	2	1	3	3	2
SVT-29	Shivta	Tepper, Bar-Oz and Gini	Daniel Fuks	2016-2020	M	550	5522		1	5			חלקי שדרה		Graminae	דגניים	4		4		2
SVT-29	Shivta	Tepper, Bar-Oz and Gini	Daniel Fuks	2016-2020	M	550	5522		1	6			פרקי דגן	culm node	Graminae	דגניים	0		0		2	מבחנה 1 מתוך 2
SVT-29	Shivta	Tepper, Bar-Oz and Gini	Daniel Fuks	2016-2020	M	550	5522		1	7			פרקי דגן	culm node	Graminae	דגניים	55		55		2	מבחנה 2 מתוך 2 סה"כ כמות 2 מבחנות -55
SVT-29	Shivta	Tepper, Bar-Oz and Gini	Daniel Fuks	2016-2020	M	550	5522		3	8	גפן	Vitis vinifera	עוקץ גפן	pedicel	Vitaceae	גפניים	1		1		2
SVT-29	Shivta	Tepper, Bar-Oz and Gini	Daniel Fuks	2016-2020	M	550	5522		3	9	גפן	Vitis vinifera	קליפה	peel	Vitaceae	גפניים					2
SVT-29	Shivta	Tepper, Bar-Oz and Gini	Daniel Fuks	2016-2020	M	550	5522		6	10	אמיך קוצני	Emex spinosa	פרי	fruit	Polygonaceae	ארכוביתיים	1		1		2	מפוחם
SVT-29	Shivta	Tepper, Bar-Oz and Gini	Daniel Fuks	2016-2020	M	550	5522		6	11	ציפורני החתול	Calendula sp.	פרי	fruit	Asteraceae	מורכבים	1		1		2	מפוחם
SVT-29	Shivta	Tepper, Bar-Oz and Gini	Daniel Fuks	2016-2020	M	550	5522		2	12	בקיית הכרשינה?	Vicia ervilia?	זרע	seed	Fabaceae	פרפרניים	1		1		2
SVT-29	Shivta	Tepper, Bar-Oz and Gini	Daniel Fuks	2016-2020	M	550	5522		1	13	דגן בגלל?		זרע	seed			1		1		2
SVT-29	Shivta	Tepper, Bar-Oz and Gini	Daniel Fuks	2016-2020	M	550	5522		7	14	בלתי										2	heavy+light	לא להתעסק	אחד של צאן מפוחם ועד של מכרסם לא מפוחם
SVT-29	Shivta	Tepper, Bar-Oz and Gini	Daniel Fuks	2016-2020	M	550	5522		8	15	גללים										2
SVT-29	Shivta	Tepper, Bar-Oz and Gini	Daniel Fuks	2016-2020	M	550	5522		7	16	רצנטי										2	אפשר בתור בסיס להשוואה
SVT-29	Shivta	Tepper, Bar-Oz and Gini	Daniel Fuks	2016-2020	M	550	5522		6	17	בלתי		מצעית	receptacle	Asteraceae	מורכבים	1		1		2	לספור פרחים באמצע. חפים חיצוניים דקים וקטנים. גם הקוטר הקטן מהווה סימן
SVT-29	Shivta	Tepper, Bar-Oz and Gini	Daniel Fuks	2016-2020	M	550	5522		6	18	בלתי		גבעול שעיר	hairy stem			1		1		2	יואל: לא מין תרבות
SVT-29	Shivta	Tepper, Bar-Oz and Gini	Daniel Fuks	2016-2020	M	550	5522		6	19	בלתי		מצעית	receptacle	Asteraceae	מורכבים	1		1		2	יואל: מצעית מורכבים
SVT-29	Shivta	Tepper, Bar-Oz and Gini	Daniel Fuks	2016-2020	M	550	5522		6	20	בלתי		מצעית	receptacle	Asteraceae	מורכבים	1		1		2	יואל: מצעית מורכבים
SVT-29	Shivta	Tepper, Bar-Oz and Gini	Daniel Fuks	2016-2020	M	550	5522		6	21	קחוון	Anthemis pseudocotula	קרקפת	capitulum	Asteraceae	מורכבים	1		1		2	קחוון מצוי?
SVT-29	Shivta	Tepper, Bar-Oz and Gini	Daniel Fuks	2016-2020	M	550	5522		3	22	גפן	Vitis vinifera	פרי לא בשל	unripe fruit	Vitaceae	גפניים	1		1		2
SVT-29	Shivta	Tepper, Bar-Oz and Gini	Daniel Fuks	2016-2020	M	550	5522		7	23	בלתי						1		1		2	יואל: אין כיוון
SVT-29	Shivta	Tepper, Bar-Oz and Gini	Daniel Fuks	2016-2020	M	550	5522			24	שעורה	Hordeum		rachis, dung	Graminae	דגניים	1		1		1
SVT-29	Shivta	Tepper, Bar-Oz and Gini	Daniel Fuks	2016-2020	M	550	5522			25	שעורה שש-טורית	Hordeum vulgare hexastichum		basal rachis	Graminae	דגניים	1		1		1
SVT-29	Shivta	Tepper, Bar-Oz and Gini	Daniel Fuks	2016-2020	M	550	5522			26	שעורה דו-טורית	Hordeum vulgare distichum/spontaneum		rachis	Graminae	דגניים	1		1		1
SVT-29	Shivta	Tepper, Bar-Oz and Gini	Daniel Fuks	2016-2020	M	550	5522			27	שעורה	Hordeum		rachis	Graminae	דגניים	37		37		1
SVT-29	Shivta	Tepper, Bar-Oz and Gini	Daniel Fuks	2016-2020	M	550	5522			28	שעורה שש-טורית	Hordeum vulgare hexastichum		rachis	Graminae	דגניים	10s		20		1
SVT-29	Shivta	Tepper, Bar-Oz and Gini	Daniel Fuks	2016-2020	M	550	5522			29	חיטה/שעורה	Hordeum/Triticum		collar	Graminae	דגניים	3		3		1
SVT-29	Shivta	Tepper, Bar-Oz and Gini	Daniel Fuks	2016-2020	M	550	5522			30	שעורה	Hordeum		collar	Graminae	דגניים	6		6		1
SVT-29	Shivta	Tepper, Bar-Oz and Gini	Daniel Fuks	2016-2020	M	550	5522			31	שעורה	Hordeum		basal rachis	Graminae	דגניים	6		6		1
SVT-29	Shivta	Tepper, Bar-Oz and Gini	Daniel Fuks	2016-2020	M	550	5522			32	חיטה	Triticum			Graminae	דגניים	2		2		1
SVT-29	Shivta	Tepper, Bar-Oz and Gini	Daniel Fuks	2016-2020	M	550	5522			33	חיטה	Triticum		basal rachis	Graminae	דגניים	2		2		1
SVT-29	Shivta	Tepper, Bar-Oz and Gini	Daniel Fuks	2016-2020	M	550	5522			34	דגני		פרק ציר שיבולת		Graminae	דגניים	1		1		1
SVT-29	Shivta	Tepper, Bar-Oz and Gini	Daniel Fuks	2016-2020	M	550	5522			35	חיטה/שעורה	Hordeum/Triticum		rachis	Graminae	דגניים	38		38		1
SVT-29	Shivta	Tepper, Bar-Oz and Gini	Daniel Fuks	2016-2020	M	550	5522			36	חיטה טטרפלוידית	Triticum turgidum s.l.		rachis	Graminae	דגניים	51		51		1
SVT-29	Shivta	Tepper, Bar-Oz and Gini	Daniel Fuks	2016-2020	M	550	5522			37	דגני			roots	Graminae	דגניים	4		4		1
SVT-29	Shivta	Tepper, Bar-Oz and Gini	Daniel Fuks	2016-2020	M	550	5522			38				culm node			50		50		1
SVT-29	Shivta	Tepper, Bar-Oz and Gini	Daniel Fuks	2016-2020	M	550	5522			39	שברי מלען וגלומה										1
SVT-29	Shivta	Tepper, Bar-Oz and Gini	Daniel Fuks	2016-2020	M	550	5522			40	נונאה/ בטנונית	Nonea/Gastrocotyle					1		1		1
SVT-29	Shivta	Tepper, Bar-Oz and Gini	Daniel Fuks	2016-2020	M	550	5522			41	אמיך קוצני	Emex spinosa	קליפת פרי	peel			1		1		1
SVT-29	Shivta	Tepper, Bar-Oz and Gini	Daniel Fuks	2016-2020	M	550	5522			42	חלמית	Malva sp.	פרודה/זרע				27		27		1
SVT-29	Shivta	Tepper, Bar-Oz and Gini	Daniel Fuks	2016-2020	M	550	5522			43	חיעד ספרדי	Aizoon hispanicum					1		1		1
SVT-29	Shivta	Tepper, Bar-Oz and Gini	Daniel Fuks	2016-2020	M	550	5522			44	אהל מצוי	Mesembryanthmeum nodiflorum									1
SVT-29	Shivta	Tepper, Bar-Oz and Gini	Daniel Fuks	2016-2020	M	550	5522			45	ליואל		תרמיל מצליב + זרעים				1		1		1
SVT-29	Shivta	Tepper, Bar-Oz and Gini	Daniel Fuks	2016-2020	M	550	5522			46	ליואל - בוצין?פיגם?	Verbascum?					1		1		1
SVT-29	Shivta	Tepper, Bar-Oz and Gini	Daniel Fuks	2016-2020	M	550	5522			47	ליואל?						8		8		1
SVT-29	Shivta	Tepper, Bar-Oz and Gini	Daniel Fuks	2016-2020	M	550	5522			48	ליואל										1
SVT-29	Shivta	Tepper, Bar-Oz and Gini	Daniel Fuks	2016-2020	M	550	5522			49	חרק										1	לא מפוחם
SVT-29	Shivta	Tepper, Bar-Oz and Gini	Daniel Fuks	2016-2020	M	550	5522			50	שברי גלל										1
SVT-29	Shivta	Tepper, Bar-Oz and Gini	Daniel Fuks	2016-2020	M	550	5522			51	בלתי-שונות										1
SVT-29	Shivta	Tepper, Bar-Oz and Gini	Daniel Fuks	2016-2020	M	550	5522			52	סלק מצוי	Beta vulgaris	פרודה				1		1		1
SVT-29	Shivta	Tepper, Bar-Oz and Gini	Daniel Fuks	2016-2020	M	550	5522			53	לחך	Plantago sp.					3		3		1
SVT-29	Shivta	Tepper, Bar-Oz and Gini	Daniel Fuks	2016-2020	M	550	5522			54	ציפרנית?	Silene?					1		1		1	להגדרה
SVT-29	Shivta	Tepper, Bar-Oz and Gini	Daniel Fuks	2016-2020	M	550	5522			55	ארנבית שרועה	Arnebia decumbrens					1		1		1
SVT-29	Shivta	Tepper, Bar-Oz and Gini	Daniel Fuks	2016-2020	M	550	5522			56	שבר לבן	Peganum harmala					3		3		1
SVT-29	Shivta	Tepper, Bar-Oz and Gini	Daniel Fuks	2016-2020	M	550	5522			57	בן-שלח	Erucaria microcarpa	מקור/תרמיל				2		2		1
SVT-29	Shivta	Tepper, Bar-Oz and Gini	Daniel Fuks	2016-2020	M	550	5522			58	מתנן	Thymelaea hirsuta	אגוזית	nutlet			1		1		1
SVT-29	Shivta	Tepper, Bar-Oz and Gini	Daniel Fuks	2016-2020	M	550	5522			59	אשל הפרקים	Tamarix aphylla					1		1		1
SVT-29	Shivta	Tepper, Bar-Oz and Gini	Daniel Fuks	2016-2020	M	550	5522			60	מתנן שעיר	Thymelaea hirsuta	עלה	leaf							1
SVT-29	Shivta	Tepper, Bar-Oz and Gini	Daniel Fuks	2016-2020	M	550	5522			61	קרקפת מורכבים						1		1		1
SVT-29	Shivta	Tepper, Bar-Oz and Gini	Daniel Fuks	2016-2020	M	550	5522			62	קרקפת מורכבים						4		4		1
SVT-29	Shivta	Tepper, Bar-Oz and Gini	Daniel Fuks	2016-2020	M	550	5522			63	ציפרני החתול	Calendula sp.					6		6		1
SVT-29	Shivta	Tepper, Bar-Oz and Gini	Daniel Fuks	2016-2020	M	550	5522			64	שבט דרדרים						2		2		1
SVT-29	Shivta	Tepper, Bar-Oz and Gini	Daniel Fuks	2016-2020	M	550	5522			65	מורכבים? - ליואל						1		1		1
SVT-29	Shivta	Tepper, Bar-Oz and Gini	Daniel Fuks	2016-2020	M	550	5522			66	זרעון - מורכבים - חרצית?						8		8		1
SVT-29	Shivta	Tepper, Bar-Oz and Gini	Daniel Fuks	2016-2020	M	550	5522			67	גפן	Vitis vinifera	חרצן	endosperm	Vitaceae	גפניים	1		1		1
SVT-29	Shivta	Tepper, Bar-Oz and Gini	Daniel Fuks	2016-2020	M	550	5522			68	גפן	Vitis vinifera	עוקץ	pedicel	Vitaceae	גפניים	6		6		1
SVT-29	Shivta	Tepper, Bar-Oz and Gini	Daniel Fuks	2016-2020	M	550	5522			69	גפן	Vitis vinifera	קליפה	peel	Vitaceae	גפניים	10		10		1
SVT-29	Shivta	Tepper, Bar-Oz and Gini	Daniel Fuks	2016-2020	M	550	5522			70	פיקוס התאנה	Ficus carica	אגוזית	nutlet			2		2		1
SVT-29	Shivta	Tepper, Bar-Oz and Gini	Daniel Fuks	2016-2020	M	550	5522			71	חיטה	Triticum			Graminae	דגניים	2		2		1
SVT-29	Shivta	Tepper, Bar-Oz and Gini	Daniel Fuks	2016-2020	M	550	5522			72	דגני				Graminae	דגניים	6		6		1
SVT-29	Shivta	Tepper, Bar-Oz and Gini	Daniel Fuks	2016-2020	M	550	5522			73	שלוחית קירחת/שעירה	Andrachne telephioides/aspera					2		2		1
SVT-29	Shivta	Tepper, Bar-Oz and Gini	Daniel Fuks	2016-2020	M	550	5522			74	דמומית?	Adonis?					1		1		1	להגדרה
SVT-29	Shivta	Tepper, Bar-Oz and Gini	Daniel Fuks	2016-2020	M	550	5522			75	פרפרני קטן						5		5		1
SVT-29	Shivta	Tepper, Bar-Oz and Gini	Daniel Fuks	2016-2020	M	550	5522			76	ארכוביתי						1		1		1
SVT-29	Shivta	Tepper, Bar-Oz and Gini	Daniel Fuks	2016-2020	M	550	5522			77	אמיך קוצני	Emex spinosa					2		2		1
SVT-29	Shivta	Tepper, Bar-Oz and Gini	Daniel Fuks	2016-2020	M	550	5522			78	Salsoleae	Salsoleae					5		5		1
SVT-30	Shivta	Tepper, Bar-Oz and Gini	Daniel Fuks	2016-2020	M	550	5536		1	1	שעורה	Hordeum	גרגיר	grain	Graminae	דגניים	1		1	1	2
SVT-30	Shivta	Tepper, Bar-Oz and Gini	Daniel Fuks	2016-2020	M	550	5536		1	2	חיטה	Triticum	גרגיר	grain	Graminae	דגניים	1		1		2
SVT-30	Shivta	Tepper, Bar-Oz and Gini	Daniel Fuks	2016-2020	M	550	5536		1	3	חיטה/שעורה	Hordeum/Triticum	גרגיר	grain	Graminae	דגניים	7	2	7		2
SVT-30	Shivta	Tepper, Bar-Oz and Gini	Daniel Fuks	2016-2020	M	550	5536		1	4			חלקי שדרה		Graminae	דגניים	1		1		2
SVT-30	Shivta	Tepper, Bar-Oz and Gini	Daniel Fuks	2016-2020	M	550	5536		1	5			פרקי דגן	culm node	Graminae	דגניים	27		27		2
SVT-30	Shivta	Tepper, Bar-Oz and Gini	Daniel Fuks	2016-2020	M	550	5536		3	6	גפן	Vitis vinifera	קליפה	peel	Vitaceae	גפניים					2
SVT-30	Shivta	Tepper, Bar-Oz and Gini	Daniel Fuks	2016-2020	M	550	5536		3	7	גפן	Vitis vinifera	עוקץ גפן	pedicel	Vitaceae	גפניים	2		2		2
SVT-30	Shivta	Tepper, Bar-Oz and Gini	Daniel Fuks	2016-2020	M	550	5536		3	8	פיקוס התאנה	Ficus carica	אגוזית בציפה/גללי	achenes in pulp?	Moraceae	תותיים	בודדים		5		2
SVT-30	Shivta	Tepper, Bar-Oz and Gini	Daniel Fuks	2016-2020	M	550	5536		3	9	תמר מצוי	Phoenix dactylifera	גלעין	stone	Palmae	דקליים	1		1		2	יפה ושלם. שווה צילום
SVT-30	Shivta	Tepper, Bar-Oz and Gini	Daniel Fuks	2016-2020	M	550	5536		6	10	אמיך קוצני	Emex spinosa	פרי	fruit	Polygonaceae	ארכוביתיים	מאות	8	200		2	לא מפוחם
SVT-30	Shivta	Tepper, Bar-Oz and Gini	Daniel Fuks	2016-2020	M	550	5536		2	11	בקיית הכרשינה	Vicia ervilia	זרע	seed	Fabaceae	פרפרניים	1		1		2
SVT-30	Shivta	Tepper, Bar-Oz and Gini	Daniel Fuks	2016-2020	M	550	5536		6	12	דבקה?	Galium?					1		1		2
SVT-30	Shivta	Tepper, Bar-Oz and Gini	Daniel Fuks	2016-2020	M	550	5536		2	13	בקיים		זרע	seed	Fabaceae	פרפרניים	1		1		2	קטנית קטנה ועגולה, לחבר בהמשך
SVT-30	Shivta	Tepper, Bar-Oz and Gini	Daniel Fuks	2016-2020	M	550	5536		6	14	כפיות שעירות	Carrichtera annua	פרי	fruit	Brassicaceae	מצליבים	1		1		2	יואל ראה
SVT-30	Shivta	Tepper, Bar-Oz and Gini	Daniel Fuks	2016-2020	M	550	5536		6	15	בוצין?	Verbascum?	פרי	fruit	Scrophulariaceae	לועניתיים	1		1		2	להגדיר. ראה קווים על הזרע, וגם לפי ההלקט
SVT-30	Shivta	Tepper, Bar-Oz and Gini	Daniel Fuks	2016-2020	M	550	5536		6	16	בלתי		קרקפת	capitulum	Asteraceae	מורכבים	1		1		2	לחבר בהמשך
SVT-30	Shivta	Tepper, Bar-Oz and Gini	Daniel Fuks	2016-2020	M	550	5536		7	17	בלתי										2	heavy+light	לא להתעסק
SVT-30	Shivta	Tepper, Bar-Oz and Gini	Daniel Fuks	2016-2020	M	550	5536		8	18	גללים		גללי צאן ומכרסם?								2	מפוחמים - כנראה גם צאן וגם מכרסמים
SVT-30	Shivta	Tepper, Bar-Oz and Gini	Daniel Fuks	2016-2020	M	550	5536		8	19	גללים		גללי מכרסם								2	לא מפוחם
SVT-30	Shivta	Tepper, Bar-Oz and Gini	Daniel Fuks	2016-2020	M	550	5536		7	20	רצנטי										2	אפשר בתור בסיס להשוואה
SVT-30	Shivta	Tepper, Bar-Oz and Gini	Daniel Fuks	2016-2020	M	550	5536		6	21	קנה/נונאה						1		1		2
SVT-30	Shivta	Tepper, Bar-Oz and Gini	Daniel Fuks	2016-2020	M	550	5536		8	22	גללים		גלל צאן				1		1		2	לא מפוחם
SVT-31	Shivta	Tepper, Bar-Oz and Gini	Daniel Fuks	2016-2020	M	551	5510		1	1	שעורה	Hordeum	גרגיר	grain	Graminae	דגניים	14		14	14	2	שניים לא מפוחמים
SVT-31	Shivta	Tepper, Bar-Oz and Gini	Daniel Fuks	2016-2020	M	551	5510		1	2	חיטה	Triticum	גרגיר	grain	Graminae	דגניים	1		1		2
SVT-31	Shivta	Tepper, Bar-Oz and Gini	Daniel Fuks	2016-2020	M	551	5510		1	3	חיטה/שעורה	Hordeum/Triticum	גרגיר	grain	Graminae	דגניים	3		3		2
SVT-31	Shivta	Tepper, Bar-Oz and Gini	Daniel Fuks	2016-2020	M	551	5510		3	4	גפן	Vitis vinifera	חרצן	pip	Vitaceae	גפניים	2		2	2	2
SVT-31	Shivta	Tepper, Bar-Oz and Gini	Daniel Fuks	2016-2020	M	551	5510		1	5			פרקי דגן	culm node	Graminae	דגניים	11		11		2
SVT-31	Shivta	Tepper, Bar-Oz and Gini	Daniel Fuks	2016-2020	M	551	5510		1	6			שברי גרגיר		Graminae	דגניים	15		15		2
SVT-31	Shivta	Tepper, Bar-Oz and Gini	Daniel Fuks	2016-2020	M	551	5510		2	7	בקיים		זרע	seed	Fabaceae	פרפרניים	3		3		2	קטנית קטנה ועגולה, לחבר בהמשך
SVT-31	Shivta	Tepper, Bar-Oz and Gini	Daniel Fuks	2016-2020	M	551	5510		2	8	עדשה	Lens culinaris	זרע	seed	Fabaceae	פרפרניים	1		1		2
SVT-31	Shivta	Tepper, Bar-Oz and Gini	Daniel Fuks	2016-2020	M	551	5510		6	9	דבקה?	Galium?			Rubiaceae	פואתיים	1		1		2
SVT-31	Shivta	Tepper, Bar-Oz and Gini	Daniel Fuks	2016-2020	M	551	5510		7	10	בצלצול						1		1		2
SVT-31	Shivta	Tepper, Bar-Oz and Gini	Daniel Fuks	2016-2020	M	551	5510		7	11	בלתי		קליפה של שורש?								2	רצנטי?	השווה ערך "תאנה??" מניצנה
SVT-31	Shivta	Tepper, Bar-Oz and Gini	Daniel Fuks	2016-2020	M	551	5510		1	12	בלתי		גרגיר	grain	Graminae	דגניים	1		1		2	שעורה? דגן אחר?
SVT-31	Shivta	Tepper, Bar-Oz and Gini	Daniel Fuks	2016-2020	M	551	5510		3	13	פיקוס התאנה	Ficus carica	אגוזית בציפה	achenes in pulp?	Moraceae	תותיים	בודדים	1	5		2
SVT-31	Shivta	Tepper, Bar-Oz and Gini	Daniel Fuks	2016-2020	M	551	5510		3	14	גפן	Vitis vinifera	קליפה	peel	Vitaceae	גפניים					2	רק heavy f
SVT-31	Shivta	Tepper, Bar-Oz and Gini	Daniel Fuks	2016-2020	M	551	5510		3	15	תמר מצוי?	Phoenix dactylifera cf.	שבר גלעין	stone fragment	Palmae	דקליים					2	רק heavy f
SVT-31	Shivta	Tepper, Bar-Oz and Gini	Daniel Fuks	2016-2020	M	551	5510		2	16	בקיים?							1	1		2	לא להתעסק
SVT-31	Shivta	Tepper, Bar-Oz and Gini	Daniel Fuks	2016-2020	M	551	5510		7	17	בלתי										2	רק heavy f	לא להתעסק
SVT-31	Shivta	Tepper, Bar-Oz and Gini	Daniel Fuks	2016-2020	M	551	5510		8	18	דגם על מתכת							1	1		2	רק heavy f
SVT-31	Shivta	Tepper, Bar-Oz and Gini	Daniel Fuks	2016-2020	M	551	5510		8	19	גללים										2	רק heavy f
SVT-31	Shivta	Tepper, Bar-Oz and Gini	Daniel Fuks	2016-2020	M	551	5510		7	20	בלתי										2	יואל?רק heavy
SVT-31	Shivta	Tepper, Bar-Oz and Gini	Daniel Fuks	2016-2020	M	551	5510		7	21	בלתי										2	יואל?רק heavy
SVT-31	Shivta	Tepper, Bar-Oz and Gini	Daniel Fuks	2016-2020	M	551	5510			22	חיטה	Triticum	גרגיר	grain	Graminae	דגניים		1	1		1
SVT-31	Shivta	Tepper, Bar-Oz and Gini	Daniel Fuks	2016-2020	M	551	5510			23	שעורה	Hordeum	גרגיר	grain	Graminae	דגניים		4	4		1
SVT-31	Shivta	Tepper, Bar-Oz and Gini	Daniel Fuks	2016-2020	M	551	5510			24	גפן	Vitis vinifera	קליפה	peel	Vitaceae	גפניים		2	2		1
SVT-31	Shivta	Tepper, Bar-Oz and Gini	Daniel Fuks	2016-2020	M	551	5510			25	גפן	Vitis vinifera	שברי חרצן		Vitaceae	גפניים		4	4		1
SVT-31	Shivta	Tepper, Bar-Oz and Gini	Daniel Fuks	2016-2020	M	551	5510			26	גפן	Vitis vinifera	עוקץ?	pedicel?	Vitaceae	גפניים		6	6		1
SVT-31	Shivta	Tepper, Bar-Oz and Gini	Daniel Fuks	2016-2020	M	551	5510			27	גרגרנית ערבית?							2	2		1
SVT-31	Shivta	Tepper, Bar-Oz and Gini	Daniel Fuks	2016-2020	M	551	5510			28	תאנה		אגוזית	nutlet				2	2		1
SVT-31	Shivta	Tepper, Bar-Oz and Gini	Daniel Fuks	2016-2020	M	551	5510			29	שעורה שש-טורית			collar + basal rachis	Graminae	דגניים		5	5		1
SVT-31	Shivta	Tepper, Bar-Oz and Gini	Daniel Fuks	2016-2020	M	551	5510			30	שעורה שש-טורית			rachis	Graminae	דגניים		37	37		1
SVT-31	Shivta	Tepper, Bar-Oz and Gini	Daniel Fuks	2016-2020	M	551	5510			31	שעורה	Hordeum		basal rachis	Graminae	דגניים		1	1		1
SVT-31	Shivta	Tepper, Bar-Oz and Gini	Daniel Fuks	2016-2020	M	551	5510			32	שעורה דו-טורית			rachis?	Graminae	דגניים		5	5		1
SVT-31	Shivta	Tepper, Bar-Oz and Gini	Daniel Fuks	2016-2020	M	551	5510			33	שעורה			rachis	Graminae	דגניים		15	15		1
SVT-31	Shivta	Tepper, Bar-Oz and Gini	Daniel Fuks	2016-2020	M	551	5510			34	חיטה	Triticum		basal rachis/ collar	Graminae	דגניים		1	1		1
SVT-31	Shivta	Tepper, Bar-Oz and Gini	Daniel Fuks	2016-2020	M	551	5510			35	חיטה x4	Triticum turgidum s.l.		basal rachis	Graminae	דגניים		1	1		1
SVT-31	Shivta	Tepper, Bar-Oz and Gini	Daniel Fuks	2016-2020	M	551	5510			36	חיטה x4	Triticum turgidum s.l.		rachis	Graminae	דגניים		29	29		1
SVT-31	Shivta	Tepper, Bar-Oz and Gini	Daniel Fuks	2016-2020	M	551	5510			37	שיבולת שועל		צלקת	abcission scar	Graminae	דגניים		1	1		1
SVT-31	Shivta	Tepper, Bar-Oz and Gini	Daniel Fuks	2016-2020	M	551	5510			38	חיטה/שעורה	Hordeum/Triticum		basal rachis fragments	Graminae	דגניים		2	2		1
SVT-31	Shivta	Tepper, Bar-Oz and Gini	Daniel Fuks	2016-2020	M	551	5510			39	חיטה/שעורה	Hordeum/Triticum		rachis	Graminae	דגניים		19	19		1
SVT-31	Shivta	Tepper, Bar-Oz and Gini	Daniel Fuks	2016-2020	M	551	5510			40	דגני			roots	Graminae	דגניים		3	3		1
SVT-31	Shivta	Tepper, Bar-Oz and Gini	Daniel Fuks	2016-2020	M	551	5510			41	דגני			grain	Graminae	דגניים		6	6		1
SVT-31	Shivta	Tepper, Bar-Oz and Gini	Daniel Fuks	2016-2020	M	551	5510			42				culm node				18	18		1
SVT-31	Shivta	Tepper, Bar-Oz and Gini	Daniel Fuks	2016-2020	M	551	5510			43	חפורית?							1	1		1
SVT-31	Shivta	Tepper, Bar-Oz and Gini	Daniel Fuks	2016-2020	M	551	5510			44	זון	Lolium sp.						3	3		1	להגדרה
SVT-31	Shivta	Tepper, Bar-Oz and Gini	Daniel Fuks	2016-2020	M	551	5510			45	דגני	Brachypodium?	צמוי עוקצר	grain				2	2		1
SVT-31	Shivta	Tepper, Bar-Oz and Gini	Daniel Fuks	2016-2020	M	551	5510			46	מתנן שעיר	Thymelaea hirsuta	אגוזית	nutlet				2	2		1
SVT-31	Shivta	Tepper, Bar-Oz and Gini	Daniel Fuks	2016-2020	M	551	5510			47	ארכוביתי							2	2		1
SVT-31	Shivta	Tepper, Bar-Oz and Gini	Daniel Fuks	2016-2020	M	551	5510			48	מתנן שעיר	Thymelaea hirsuta	עלה	leaf				21	21		1
SVT-31	Shivta	Tepper, Bar-Oz and Gini	Daniel Fuks	2016-2020	M	551	5510			49	מצליב		תרמיל					1	1		1
SVT-31	Shivta	Tepper, Bar-Oz and Gini	Daniel Fuks	2016-2020	M	551	5510			50	גלעינית	Buglossoides	זעירת פרחים					1	1		1	לוודא
SVT-31	Shivta	Tepper, Bar-Oz and Gini	Daniel Fuks	2016-2020	M	551	5510			51	חלמית	Malva sp.						4	4		1
SVT-31	Shivta	Tepper, Bar-Oz and Gini	Daniel Fuks	2016-2020	M	551	5510			52	עירית/ צרת-עלים/נבובה	Asphodelus tenuifolia/fistulosus						1	1		1
SVT-31	Shivta	Tepper, Bar-Oz and Gini	Daniel Fuks	2016-2020	M	551	5510			53	ציפורני החתול	Calendula sp.						1	1		1
SVT-31	Shivta	Tepper, Bar-Oz and Gini	Daniel Fuks	2016-2020	M	551	5510			54	אהל מצוי	Mesembryanthmeum nodiflorum									1
SVT-31	Shivta	Tepper, Bar-Oz and Gini	Daniel Fuks	2016-2020	M	551	5510			55	דבקה?	Galium?						1	1		1
SVT-31	Shivta	Tepper, Bar-Oz and Gini	Daniel Fuks	2016-2020	M	551	5510			56	שונות							6	6		1	לא מפוחם-רצנטי?
SVT-31	Shivta	Tepper, Bar-Oz and Gini	Daniel Fuks	2016-2020	M	551	5510			57	בלתי-שונות										1
SVT-31	Shivta	Tepper, Bar-Oz and Gini	Daniel Fuks	2016-2020	M	551	5510			58	ליואל							3	3		1
SVT-31	Shivta	Tepper, Bar-Oz and Gini	Daniel Fuks	2016-2020	M	551	5510			59	גללים		שברים								1	רק חלק נאסף
SVT-32	Shivta	Tepper, Bar-Oz and Gini	Daniel Fuks	2016-2020	M	552	5519		1	1	שעורה	Hordeum	גרגיר	grain	Graminae	דגניים		1	1	1	2
SVT-32	Shivta	Tepper, Bar-Oz and Gini	Daniel Fuks	2016-2020	M	552	5519		1	2	חיטה	Triticum	גרגיר	grain	Graminae	דגניים	1		1		2
SVT-32	Shivta	Tepper, Bar-Oz and Gini	Daniel Fuks	2016-2020	M	552	5519		6	3	אמיך קוצני	Emex spinosa	פרי	fruit	Polygonaceae	ארכוביתיים	2		2		2	לא מפוחם
SVT-32	Shivta	Tepper, Bar-Oz and Gini	Daniel Fuks	2016-2020	M	552	5519		3	4	תמר מצוי?	Phoenix dactylifera cf.	חותם	?	Palmae	דקליים					2	לבדוק
SVT-32	Shivta	Tepper, Bar-Oz and Gini	Daniel Fuks	2016-2020	M	552	5519		8	5	גללים										2
SVT-32	Shivta	Tepper, Bar-Oz and Gini	Daniel Fuks	2016-2020	M	552	5519		7	6	בלתי										2	חבלבל?רימון?
SVT-32	Shivta	Tepper, Bar-Oz and Gini	Daniel Fuks	2016-2020	M	552	5519		1	7			פרקי דגן	culm node	Graminae	דגניים	8		8		2
SVT-32	Shivta	Tepper, Bar-Oz and Gini	Daniel Fuks	2016-2020	M	552	5519		8	8	חרק										2	heavy f	רצנטי
SVT-32	Shivta	Tepper, Bar-Oz and Gini	Daniel Fuks	2016-2020	M	552	5519		7	9	פיקוס התאנה?	Ficus carica?	אגוזית בציפה/גללי	achenes in pulp?	Moraceae?	תותיים?					2	רק heavy f
SVT-33	Shivta	Tepper, Bar-Oz and Gini	Daniel Fuks	2016-2020	M	554	5533		1	1	שעורה	Hordeum	גרגיר	grain	Graminae	דגניים	3		3	3	2
SVT-141	Shivta	Tepper, Bar-Oz and Gini	Daniel Fuks	2016-2020	M	554	5533			1	שעורה	Hordeum	גרגיר	grain	Graminae	דגניים				2	2
SVT-33	Shivta	Tepper, Bar-Oz and Gini	Daniel Fuks	2016-2020	M	554	5533		1	2	חיטה/שעורה	Hordeum/Triticum	גרגיר	grain	Graminae	דגניים	3		3		2
SVT-141	Shivta	Tepper, Bar-Oz and Gini	Daniel Fuks	2016-2020	M	554	5533			2	חיטה	Triticum	גרגיר	grain	Graminae	דגניים			1	1	2
SVT-141	Shivta	Tepper, Bar-Oz and Gini	Daniel Fuks	2016-2020	M	554	5533			3	חיטה/שעורה	Hordeum/Triticum	גרגיר	grain	Graminae	דגניים			1	1	2
SVT-33	Shivta	Tepper, Bar-Oz and Gini	Daniel Fuks	2016-2020	M	554	5533		3	3	גפן	Vitis vinifera	חרצן	pip	Vitaceae	גפניים	12		12	12	2
SVT-33	Shivta	Tepper, Bar-Oz and Gini	Daniel Fuks	2016-2020	M	554	5533		3	4	פיקוס התאנה	Ficus carica	אגוזית בציפה	achenes in pulp?	Moraceae	תותיים	בודדים		5		2
SVT-141	Shivta	Tepper, Bar-Oz and Gini	Daniel Fuks	2016-2020	M	554	5533			4	גפן	Vitis vinifera	חרצן	pip	Vitaceae	גפניים			21	21	2	מתוכם 12 שלמים לגמרי. 4 הופרשו למחקר גנטי. יש שני טיפוסים, ראה עמ' 80 במחברת 2
SVT-33	Shivta	Tepper, Bar-Oz and Gini	Daniel Fuks	2016-2020	M	554	5533		2	5	עדשה??	Lens culinaris?	זרע	seed	Fabaceae	פרפרניים	1		1		2	להשוות לשאר העדשים
SVT-141	Shivta	Tepper, Bar-Oz and Gini	Daniel Fuks	2016-2020	M	554	5533			5			פרקי דגן	culm node	Graminae	דגניים			9	9	2	אחד לא מפוחם
SVT-33	Shivta	Tepper, Bar-Oz and Gini	Daniel Fuks	2016-2020	M	554	5533		8	6	גללים										2
SVT-141	Shivta	Tepper, Bar-Oz and Gini	Daniel Fuks	2016-2020	M	554	5533			6			שרשי דגן	roots	Graminae	דגניים			1	1	2
SVT-141	Shivta	Tepper, Bar-Oz and Gini	Daniel Fuks	2016-2020	M	554	5533			7	גפן	Vitis vinifera	עוקץ	pedicel	Vitaceae	גפניים			1	1	2
SVT-33	Shivta	Tepper, Bar-Oz and Gini	Daniel Fuks	2016-2020	M	554	5533		7	7	cf. רימון	cf. Punica granatum	קליפת פרי	rind	רימוניים	Lythraceae	1		1		2
SVT-33	Shivta	Tepper, Bar-Oz and Gini	Daniel Fuks	2016-2020	M	554	5533		7	8	רצנטי										2	אפשר בתור בסיס להשוואה
SVT-141	Shivta	Tepper, Bar-Oz and Gini	Daniel Fuks	2016-2020	M	554	5533			8	עוקצים ליואל		עוקץ	pedicel							2
SVT-33	Shivta	Tepper, Bar-Oz and Gini	Daniel Fuks	2016-2020	M	554	5533		3	9	זית אירופאי?	Olea europaea?	שבר גלעין	stone fragment	Oleaceae	זיתיים	1	1	1		2	השבר המפוחם מ-heavy f
SVT-141	Shivta	Tepper, Bar-Oz and Gini	Daniel Fuks	2016-2020	M	554	5533			9	כרשינה?		זרע ופסיג	seed and cotyledon	Fabaceae	פרפרניים			2	2	2
SVT-141	Shivta	Tepper, Bar-Oz and Gini	Daniel Fuks	2016-2020	M	554	5533			10	קדד/גרגרנית	Astragalus/Trigonella	זרע	seed	Fabaceae	פרפרניים			1	1	2
SVT-33	Shivta	Tepper, Bar-Oz and Gini	Daniel Fuks	2016-2020	M	554	5533		1	10			פרקי דגן	culm node	Graminae	דגניים	3		3		2
SVT-141	Shivta	Tepper, Bar-Oz and Gini	Daniel Fuks	2016-2020	M	554	5533			11	תמר	Phoenix dactylifera	שבר גלעין						2	2	2	אחד מפוחם אחד לא
SVT-33	Shivta	Tepper, Bar-Oz and Gini	Daniel Fuks	2016-2020	M	554	5533		3	11	גפן?	Vitis vinifera?	עוקץ	pedicel	Vitaceae	גפניים	1	1	1		2
SVT-141	Shivta	Tepper, Bar-Oz and Gini	Daniel Fuks	2016-2020	M	554	5533			12	cf. רימון	cf. Punica granatum	קליפת פרי						1	1	2
SVT-33	Shivta	Tepper, Bar-Oz and Gini	Daniel Fuks	2016-2020	M	554	5533		7	12	בלתי							שונות, קליפות, אפשר לנסות למיין אך לדעתי לא צריך להתעסק			2
SVT-33	Shivta	Tepper, Bar-Oz and Gini	Daniel Fuks	2016-2020	M	554	5533		8	13	זכוכית										2
SVT-141	Shivta	Tepper, Bar-Oz and Gini	Daniel Fuks	2016-2020	M	554	5533			13	דלועי?										2	לא מפוחם
SVT-141	Shivta	Tepper, Bar-Oz and Gini	Daniel Fuks	2016-2020	M	554	5533			14	אמיך קוצני	Emex spinosa							1	1	2	לא מפוחם
SVT-33	Shivta	Tepper, Bar-Oz and Gini	Daniel Fuks	2016-2020	M	554	5533		8	14	מתכת- משקולת?										2	heavy f
SVT-33	Shivta	Tepper, Bar-Oz and Gini	Daniel Fuks	2016-2020	M	554	5533		8	15	מתכת										2	heavy f
SVT-141	Shivta	Tepper, Bar-Oz and Gini	Daniel Fuks	2016-2020	M	554	5533			15	בלתי										2	לא מפוחם
SVT-141	Shivta	Tepper, Bar-Oz and Gini	Daniel Fuks	2016-2020	M	554	5533			16	בלתי ליואל								25	25	2	לא מפוחם
SVT-141	Shivta	Tepper, Bar-Oz and Gini	Daniel Fuks	2016-2020	M	554	5533			17	כנפן?								9	9	2	לא מפוחם
SVT-141	Shivta	Tepper, Bar-Oz and Gini	Daniel Fuks	2016-2020	M	554	5533			18	אספסת?		תרמיל								2	לא מפוחם
SVT-141	Shivta	Tepper, Bar-Oz and Gini	Daniel Fuks	2016-2020	M	554	5533			19	בלתי-שונות										2
SVT-141	Shivta	Tepper, Bar-Oz and Gini	Daniel Fuks	2016-2020	M	554	5533			20	גלל?										2
SVT-141	Shivta	Tepper, Bar-Oz and Gini	Daniel Fuks	2016-2020	M	554	5533			21	חרק										2	לא מפוחם
SVT-141	Shivta	Tepper, Bar-Oz and Gini	Daniel Fuks	2016-2020	M	554	5533			22	גללים										2
SVT-141	Shivta	Tepper, Bar-Oz and Gini	Daniel Fuks	2016-2020	M	554	5533			23	זרדים										2
SVT-141	Shivta	Tepper, Bar-Oz and Gini	Daniel Fuks	2016-2020	M	554	5533			24	תכשיטים										2
SVT-141	Shivta	Tepper, Bar-Oz and Gini	Daniel Fuks	2016-2020	M	554	5533			25	קרמיקה וזכוכית										2
SVT-141	Shivta	Tepper, Bar-Oz and Gini	Daniel Fuks	2016-2020	M	554	5533			26	עצמות										2
SVT-141	Shivta	Tepper, Bar-Oz and Gini	Daniel Fuks	2016-2020	M	554	5533			27	מלעניאל??		מלען								2	היה ועף לי
SVT-34	Shivta	Tepper, Bar-Oz and Gini	Daniel Fuks	2016-2020	M	556	5554		1	1	שעורה	Hordeum	גרגיר	grain	Graminae	דגניים	11		11	11	2
SVT-34	Shivta	Tepper, Bar-Oz and Gini	Daniel Fuks	2016-2020	M	556	5554		1	2	חיטה	Triticum	גרגיר	grain	Graminae	דגניים	1		1		2
SVT-34	Shivta	Tepper, Bar-Oz and Gini	Daniel Fuks	2016-2020	M	556	5554		1	3	חיטה/שעורה	Hordeum/Triticum	גרגיר	grain	Graminae	דגניים	4	2	4		2
SVT-34	Shivta	Tepper, Bar-Oz and Gini	Daniel Fuks	2016-2020	M	556	5554		3	4	גפן	Vitis vinifera	חרצן	pip	Vitaceae	גפניים	1		1	1	2
SVT-34	Shivta	Tepper, Bar-Oz and Gini	Daniel Fuks	2016-2020	M	556	5554		1	5			פרקי דגן	culm node	Graminae	דגניים	37		37		2
SVT-34	Shivta	Tepper, Bar-Oz and Gini	Daniel Fuks	2016-2020	M	556	5554		6	6	אמיך קוצני	Emex spinosa	פרי	fruit	Polygonaceae	ארכוביתיים	מאות	2	200		2	לא מפוחם
SVT-34	Shivta	Tepper, Bar-Oz and Gini	Daniel Fuks	2016-2020	M	556	5554		6	7	אמיך קוצני	Emex spinosa	פרי	fruit	Polygonaceae	ארכוביתיים	2		2		2	מפוחם
SVT-34	Shivta	Tepper, Bar-Oz and Gini	Daniel Fuks	2016-2020	M	556	5554		6	8	בלתי		קרקפת	capitulum	Asteraceae	מורכבים	2		2		2
SVT-34	Shivta	Tepper, Bar-Oz and Gini	Daniel Fuks	2016-2020	M	556	5554		2	9	בקיה/טופח		זרע	seed	Fabaceae	פרפרניים	1		1		2	לא להגדרה
SVT-34	Shivta	Tepper, Bar-Oz and Gini	Daniel Fuks	2016-2020	M	556	5554		3	10	פיקוס התאנה	Ficus carica	אגוזית בציפה	achenes in pulp?	Moraceae	תותיים	בודדים		5		2
SVT-34	Shivta	Tepper, Bar-Oz and Gini	Daniel Fuks	2016-2020	M	556	5554		3	11	זית אירופאי	Olea europaea	שבר גלעין	stone fragment	Oleaceae	זיתיים	1		1		2	לא מפוחם
SVT-34	Shivta	Tepper, Bar-Oz and Gini	Daniel Fuks	2016-2020	M	556	5554		7	12	בלתי										2	שונות- אחד ליואל
SVT-34	Shivta	Tepper, Bar-Oz and Gini	Daniel Fuks	2016-2020	M	556	5554		?	13	אלה	Pistacia		exocarp	Anacardiaceae	אלתיים	1		1		2
SVT-34	Shivta	Tepper, Bar-Oz and Gini	Daniel Fuks	2016-2020	M	556	5554		7	14	בלתי		גבעול	stem				לא מפוחם. יואל: לא יודע לזהות			2	מעניין. ?רצנטי
SVT-34	Shivta	Tepper, Bar-Oz and Gini	Daniel Fuks	2016-2020	M	556	5554		7	15	בלתי										2
SVT-34	Shivta	Tepper, Bar-Oz and Gini	Daniel Fuks	2016-2020	M	556	5554		8	16	גללים										2	לא להתעסק
SVT-34	Shivta	Tepper, Bar-Oz and Gini	Daniel Fuks	2016-2020	M	556	5554		3	17	תמר מצוי	Phoenix dactylifera	שבר גלעין	stone fragment	Palmae	דקליים		2			2	heavy f
SVT-34	Shivta	Tepper, Bar-Oz and Gini	Daniel Fuks	2016-2020	M	556	5554		7	18	בלתי			straw impressions							2	heavy f
SVT-34	Shivta	Tepper, Bar-Oz and Gini	Daniel Fuks	2016-2020	M	556	5554		6	19	רצנטי										2	heavy f
SVT-34	Shivta	Tepper, Bar-Oz and Gini	Daniel Fuks	2016-2020	M	556	5554		8	20	גללים										2	heavy f גללים מפוחמים
SVT-35	Shivta	Tepper, Bar-Oz and Gini	Daniel Fuks	2016-2020	M	557	5557		1	1	שעורה	Hordeum	גרגיר	grain	Graminae	דגניים	1		1	1	2
SVT-35	Shivta	Tepper, Bar-Oz and Gini	Daniel Fuks	2016-2020	M	557	5557		1	2	חיטה	Triticum	גרגיר	grain	Graminae	דגניים	1		1		2
SVT-35	Shivta	Tepper, Bar-Oz and Gini	Daniel Fuks	2016-2020	M	557	5557		1	3	חיטה/שעורה	Hordeum/Triticum	גרגיר	grain	Graminae	דגניים	1		1		2
SVT-35	Shivta	Tepper, Bar-Oz and Gini	Daniel Fuks	2016-2020	M	557	5557		1	4			פרקי דגן	culm node	Graminae	דגניים	3		3		2
SVT-35	Shivta	Tepper, Bar-Oz and Gini	Daniel Fuks	2016-2020	M	557	5557		1	5			חלקי שדרה	rachis fragment	Graminae	דגניים	1		1		2
SVT-35	Shivta	Tepper, Bar-Oz and Gini	Daniel Fuks	2016-2020	M	557	5557		3	6	בלתי										2	אולי תאנה - ציפה
SVT-35	Shivta	Tepper, Bar-Oz and Gini	Daniel Fuks	2016-2020	M	557	5557		2	7	קטנית		זרע	seed	Fabaceae	פרפרניים	1		1		2	לא להתעסק
SVT-35	Shivta	Tepper, Bar-Oz and Gini	Daniel Fuks	2016-2020	M	557	5557		6	8	אמיך קוצני	Emex spinosa	פרי	fruit	Polygonaceae	ארכוביתיים	4		4		2	לא מפוחם
SVT-35	Shivta	Tepper, Bar-Oz and Gini	Daniel Fuks	2016-2020	M	557	5557		2	9	בלתי		?שברי זרעים	seed fragments?	Fabaceae?	פרפרניים?	2		2		2	heavy f+light f
SVT-35	Shivta	Tepper, Bar-Oz and Gini	Daniel Fuks	2016-2020	M	557	5557		8	10	גללים										2
SVT-35	Shivta	Tepper, Bar-Oz and Gini	Daniel Fuks	2016-2020	M	557	5557		7	11	בלתי		גלל מכרסם?								2	heavy f/להגדרה
SVT-35	Shivta	Tepper, Bar-Oz and Gini	Daniel Fuks	2016-2020	M	557	5557		7	12	בלתי		גלל מכרסם?								2	heavy f/להגדרה
SVT-35	Shivta	Tepper, Bar-Oz and Gini	Daniel Fuks	2016-2020	M	557	5557			13	שעורה	Hordeum		collar	Graminae	דגניים	1		1		1
SVT-35	Shivta	Tepper, Bar-Oz and Gini	Daniel Fuks	2016-2020	M	557	5557			14	שעורה	Hordeum		rachis	Graminae	דגניים	5		5		1
SVT-35	Shivta	Tepper, Bar-Oz and Gini	Daniel Fuks	2016-2020	M	557	5557			15	שעורה שש-טורית			rachis	Graminae	דגניים	7		7		1
SVT-35	Shivta	Tepper, Bar-Oz and Gini	Daniel Fuks	2016-2020	M	557	5557			16	שעורה	Hordeum		basal rachis	Graminae	דגניים	1		1		1
SVT-35	Shivta	Tepper, Bar-Oz and Gini	Daniel Fuks	2016-2020	M	557	5557			17	שעורה	Hordeum		basal rachis	Graminae	דגניים	1		1		1
SVT-35	Shivta	Tepper, Bar-Oz and Gini	Daniel Fuks	2016-2020	M	557	5557			18	שעורה שש-טורית		מגלל	w/dung	Graminae	דגניים	1		1		1
SVT-35	Shivta	Tepper, Bar-Oz and Gini	Daniel Fuks	2016-2020	M	557	5557			19	חיטה x4			rachis	Graminae	דגניים	5		5		1
SVT-35	Shivta	Tepper, Bar-Oz and Gini	Daniel Fuks	2016-2020	M	557	5557			20	חיטה	Triticum		basal rachis	Graminae	דגניים	1		1		1
SVT-35	Shivta	Tepper, Bar-Oz and Gini	Daniel Fuks	2016-2020	M	557	5557			21	חיטה/שעורה	Hordeum/Triticum		rachis	Graminae	דגניים	4		4		1
SVT-35	Shivta	Tepper, Bar-Oz and Gini	Daniel Fuks	2016-2020	M	557	5557			22				culm node			6		6		1
SVT-35	Shivta	Tepper, Bar-Oz and Gini	Daniel Fuks	2016-2020	M	557	5557			23	דגני - שברי מלען וגלומה						1		1		1
SVT-35	Shivta	Tepper, Bar-Oz and Gini	Daniel Fuks	2016-2020	M	557	5557			24	תאנה	Ficus carica	אגוזית	nutlet			2		2		1
SVT-35	Shivta	Tepper, Bar-Oz and Gini	Daniel Fuks	2016-2020	M	557	5557			25	חיטה cf.			grain	Graminae	דגניים	1		1		1
SVT-35	Shivta	Tepper, Bar-Oz and Gini	Daniel Fuks	2016-2020	M	557	5557			26	גפן	Vitis vinifera	שבר חרצן		Vitaceae	גפניים	2		2		1
SVT-35	Shivta	Tepper, Bar-Oz and Gini	Daniel Fuks	2016-2020	M	557	5557			27	פרפרני						1		1		1
SVT-35	Shivta	Tepper, Bar-Oz and Gini	Daniel Fuks	2016-2020	M	557	5557			28	פרפרני-ליואל						1		1		1
SVT-35	Shivta	Tepper, Bar-Oz and Gini	Daniel Fuks	2016-2020	M	557	5557			29	גרגרנית ערבית?		זרע	seed			1		1		1
SVT-35	Shivta	Tepper, Bar-Oz and Gini	Daniel Fuks	2016-2020	M	557	5557			30	עכנאי?זיפני	Echium?					1		1		1	להגדרה
SVT-35	Shivta	Tepper, Bar-Oz and Gini	Daniel Fuks	2016-2020	M	557	5557			31	ארנבית שרועה	Arnebia decumbrens					1		1		1
SVT-35	Shivta	Tepper, Bar-Oz and Gini	Daniel Fuks	2016-2020	M	557	5557			32	נונאה/ בטנונית	Nonea/Gastrocotyle					1		1		1	להגדרה
SVT-35	Shivta	Tepper, Bar-Oz and Gini	Daniel Fuks	2016-2020	M	557	5557			33	אמיך קוצני	Emex spinosa					5		5		1
SVT-35	Shivta	Tepper, Bar-Oz and Gini	Daniel Fuks	2016-2020	M	557	5557			34	אהל מצוי	Mesembryanthmeum nodiflorum									1
SVT-35	Shivta	Tepper, Bar-Oz and Gini	Daniel Fuks	2016-2020	M	557	5557			35	בן-שלח	Erucaria microcarpa					2		2		1
SVT-35	Shivta	Tepper, Bar-Oz and Gini	Daniel Fuks	2016-2020	M	557	5557			36	שבט דרדרים	Centauria					2		2		1
SVT-35	Shivta	Tepper, Bar-Oz and Gini	Daniel Fuks	2016-2020	M	557	5557			37	חלמית	Malva sp.					109		109		1	לא מפוחם
SVT-35	Shivta	Tepper, Bar-Oz and Gini	Daniel Fuks	2016-2020	M	557	5557			38	לחך	Plantago sp.					2		2		1
SVT-35	Shivta	Tepper, Bar-Oz and Gini	Daniel Fuks	2016-2020	M	557	5557			39	ציפורני החתול	Calendula sp.					1		1		1
SVT-35	Shivta	Tepper, Bar-Oz and Gini	Daniel Fuks	2016-2020	M	557	5557			40	גלל		שבר								1
SVT-35	Shivta	Tepper, Bar-Oz and Gini	Daniel Fuks	2016-2020	M	557	5557			41	בלתי - שונות										1
SVT-35	Shivta	Tepper, Bar-Oz and Gini	Daniel Fuks	2016-2020	M	557	5557			42	חרק						12		12		1
SVT-35	Shivta	Tepper, Bar-Oz and Gini	Daniel Fuks	2016-2020	M	557	5557			43	בלתי - שונות										1
SVT-36	Shivta	Tepper, Bar-Oz and Gini	Daniel Fuks	2016-2020	M	557	5558		1	1	שעורה	Hordeum	גרגיר	grain	Graminae	דגניים	2		2	2	2
SVT-36	Shivta	Tepper, Bar-Oz and Gini	Daniel Fuks	2016-2020	M	557	5558		3	2	גפן	Vitis vinifera	חרצן	pip	Vitaceae	גפניים	4		4	4	2
SVT-36	Shivta	Tepper, Bar-Oz and Gini	Daniel Fuks	2016-2020	M	557	5558		1	3			פרקי דגן	culm node	Graminae	דגניים	12		12		2
SVT-36	Shivta	Tepper, Bar-Oz and Gini	Daniel Fuks	2016-2020	M	557	5558		3	4	פיקוס התאנה?	Ficus carica?	?ציפה	pulp?	Moraceae?	תותיים?					2
SVT-36	Shivta	Tepper, Bar-Oz and Gini	Daniel Fuks	2016-2020	M	557	5558		2	5	עדשה?		זרע	seed	Fabaceae	פרפרניים	2		2		2
SVT-36	Shivta	Tepper, Bar-Oz and Gini	Daniel Fuks	2016-2020	M	557	5558		2	6	בקיים	Vicieae	זרע	seed	Fabaceae	פרפרניים	4		4		2	לא להתעסק
SVT-36	Shivta	Tepper, Bar-Oz and Gini	Daniel Fuks	2016-2020	M	557	5558		3	7	זית אירופאי	Olea europaea	שבר גלעין	stone fragment	Oleaceae	זיתיים	1		1		2	שביר מאד- לא מפוחם
SVT-36	Shivta	Tepper, Bar-Oz and Gini	Daniel Fuks	2016-2020	M	557	5558		6	8	ציפורני החתול	Calendula sp.	פרי	fruit	Asteraceae	מורכבים	1		1		2
SVT-36	Shivta	Tepper, Bar-Oz and Gini	Daniel Fuks	2016-2020	M	557	5558		8	9	בטן חרק										2
SVT-36	Shivta	Tepper, Bar-Oz and Gini	Daniel Fuks	2016-2020	M	557	5558		7	10	בלתי										2	יואל: קטנית? חבלבל?	לא להתעסק
SVT-36	Shivta	Tepper, Bar-Oz and Gini	Daniel Fuks	2016-2020	M	557	5558		7	11	בלתי										2	למיין
SVT-36	Shivta	Tepper, Bar-Oz and Gini	Daniel Fuks	2016-2020	M	557	5558		8	12	גללים										2
SVT-36	Shivta	Tepper, Bar-Oz and Gini	Daniel Fuks	2016-2020	M	557	5558		7	13	בלתי							קליפת גפן?			2	heavy f
SVT-37	Shivta	Tepper, Bar-Oz and Gini	Daniel Fuks	2016-2020	M	563	5585		1	1	שעורה	Hordeum	גרגיר	grain	Graminae	דגניים	2		2	2	2
SVT-37	Shivta	Tepper, Bar-Oz and Gini	Daniel Fuks	2016-2020	M	563	5585		1	2			גרגיר	grain	Graminae	דגניים	2		2		2	יואל: רק דגן
SVT-37	Shivta	Tepper, Bar-Oz and Gini	Daniel Fuks	2016-2020	M	563	5585		3	3	גפן	Vitis vinifera	חרצן	pip	Vitaceae	גפניים	6		6	6	2
SVT-37	Shivta	Tepper, Bar-Oz and Gini	Daniel Fuks	2016-2020	M	563	5585		6	4	דבקה	Galium			Rubiaceae	פואתיים	1		1		2
SVT-37	Shivta	Tepper, Bar-Oz and Gini	Daniel Fuks	2016-2020	M	563	5585		2	5	בקיים		זרע	seed	Fabaceae	פרפרניים	3		3		2
SVT-37	Shivta	Tepper, Bar-Oz and Gini	Daniel Fuks	2016-2020	M	563	5585		1	6			פרקי דגן	culm node	Graminae	דגניים	6		6		2
SVT-37	Shivta	Tepper, Bar-Oz and Gini	Daniel Fuks	2016-2020	M	563	5585		1	7			שברי גרגיר		Graminae	דגניים	5		5		2
SVT-37	Shivta	Tepper, Bar-Oz and Gini	Daniel Fuks	2016-2020	M	563	5585		1	8			חלקי שדרה	rachis fragment	Graminae	דגניים	1		1		2
SVT-37	Shivta	Tepper, Bar-Oz and Gini	Daniel Fuks	2016-2020	M	563	5585		6	9	אמיך קוצני	Emex spinosa	פרי	fruit	Polygonaceae	ארכוביתיים	1		1		2	לא מפוחם, שמור היטב
SVT-37	Shivta	Tepper, Bar-Oz and Gini	Daniel Fuks	2016-2020	M	563	5585		3	10	זית אירופאי	Olea europaea	שבר גלעין	stone fragment	Oleaceae	זיתיים	1		1		2
SVT-37	Shivta	Tepper, Bar-Oz and Gini	Daniel Fuks	2016-2020	M	563	5585		7	11	בלתי		קליפות								2	לחזור לזה
SVT-37	Shivta	Tepper, Bar-Oz and Gini	Daniel Fuks	2016-2020	M	563	5585		7	12	לחך	Plantago sp.									2	סגלגל? ענק
SVT-37	Shivta	Tepper, Bar-Oz and Gini	Daniel Fuks	2016-2020	M	563	5585		7	13	בלתי										2	לחזור לזה
SVT-37	Shivta	Tepper, Bar-Oz and Gini	Daniel Fuks	2016-2020	M	563	5585		8	14	גללים		סוגים שונים								2	סוגים שונים
SVT-37	Shivta	Tepper, Bar-Oz and Gini	Daniel Fuks	2016-2020	M	563	5585		6	15	להגדרה					סלקיים					2	להתחיל עם אלניה
SVT-37	Shivta	Tepper, Bar-Oz and Gini	Daniel Fuks	2016-2020	M	563	5585		3	16	תמר מצוי?	Phoenix dactylifera cf.	שבר גלעין	stone fragment	Palmae	דקליים					2	heavy f
SVT-37	Shivta	Tepper, Bar-Oz and Gini	Daniel Fuks	2016-2020	M	563	5585		3	17	גפן	Vitis vinifera	שבר חרצן	pip fragment	Vitaceae	גפניים					2	heavy f
SVT-37	Shivta	Tepper, Bar-Oz and Gini	Daniel Fuks	2016-2020	M	563	5585		8	18	גללים		שבר גללי צאן								2	heavy f
SVT-37	Shivta	Tepper, Bar-Oz and Gini	Daniel Fuks	2016-2020	M	563	5585		7	19	בלתי										2	heavy f	לא להתעסק
SVT-37	Shivta	Tepper, Bar-Oz and Gini	Daniel Fuks	2016-2020	M	563	5585		8	20	גללים		סוג שונה								2	heavy f	סוג שונה
SVT-38	Shivta	Tepper, Bar-Oz and Gini	Daniel Fuks	2016-2020	M	564	5593		1	1	שעורה	Hordeum	גרגיר	grain	Graminae	דגניים	4		4	4	2
SVT-38	Shivta	Tepper, Bar-Oz and Gini	Daniel Fuks	2016-2020	M	564	5593		3	2	גפן	Vitis vinifera	חרצן	pip	Vitaceae	גפניים		1	1	1	2
SVT-38	Shivta	Tepper, Bar-Oz and Gini	Daniel Fuks	2016-2020	M	564	5593		2	3	בקיים		זרע	seed	Fabaceae	פרפרניים	4		4		2	למיין
SVT-38	Shivta	Tepper, Bar-Oz and Gini	Daniel Fuks	2016-2020	M	564	5593		3	4	זית אירופאי	Olea europaea	שבר גלעין	stone fragment	Oleaceae	זיתיים					2
SVT-38	Shivta	Tepper, Bar-Oz and Gini	Daniel Fuks	2016-2020	M	564	5593			5	להגדרה					שושניים	1		1		2	יואל: להתחיל עם זמזומית
SVT-38	Shivta	Tepper, Bar-Oz and Gini	Daniel Fuks	2016-2020	M	564	5593		6	6	ציפורני החתול	Calendula	פרי	fruit	Asteraceae	מורכבים					2	רצנטי
SVT-38	Shivta	Tepper, Bar-Oz and Gini	Daniel Fuks	2016-2020	M	564	5593		7	7	בלתי										2	קליפת זרע אבטיח?
SVT-38	Shivta	Tepper, Bar-Oz and Gini	Daniel Fuks	2016-2020	M	564	5593		8	8	גללים										2
SVT-38	Shivta	Tepper, Bar-Oz and Gini	Daniel Fuks	2016-2020	M	564	5593		1	9			פרקי דגן	culm node	Graminae	דגניים	4		4		2
SVT-38	Shivta	Tepper, Bar-Oz and Gini	Daniel Fuks	2016-2020	M	564	5593			10	בלתי										2	יואל? Heavy f
SVT-38	Shivta	Tepper, Bar-Oz and Gini	Daniel Fuks	2016-2020	M	564	5593		7	11	בלתי										2
SVT-39	Shivta	Tepper, Bar-Oz and Gini	Daniel Fuks	2016-2020	M	564	5594		1	1	שעורה	Hordeum	גרגיר	grain	Graminae	דגניים	3		3	3	2
SVT-39	Shivta	Tepper, Bar-Oz and Gini	Daniel Fuks	2016-2020	M	564	5594		3	2	גפן	Vitis vinifera	עוקץ	pedicel	Vitaceae	גפניים	3		3		2
SVT-39	Shivta	Tepper, Bar-Oz and Gini	Daniel Fuks	2016-2020	M	564	5594		1	3			פרקי דגן	culm node	Graminae	דגניים	5		5		2
SVT-39	Shivta	Tepper, Bar-Oz and Gini	Daniel Fuks	2016-2020	M	564	5594		1	4			שברי גרגיר	grain fragments	Graminae	דגניים	6		6		2
SVT-39	Shivta	Tepper, Bar-Oz and Gini	Daniel Fuks	2016-2020	M	564	5594		2	5	בקיים		זרע	seed	Fabaceae	פרפרניים	1		1		2	לחבר בהמשך. יש דומים מניצנה ועוד
SVT-39	Shivta	Tepper, Bar-Oz and Gini	Daniel Fuks	2016-2020	M	564	5594		2	6	בקיית הכרשינה	Vicia ervilia	זרע	seed	Fabaceae	פרפרניים	3		3		2
SVT-39	Shivta	Tepper, Bar-Oz and Gini	Daniel Fuks	2016-2020	M	564	5594		3	7	תמר מצוי?	Phoenix dactylifera cf.	שבר גלעין	stone fragment	Palmae	דקליים					2
SVT-39	Shivta	Tepper, Bar-Oz and Gini	Daniel Fuks	2016-2020	M	564	5594		7	8	בלתי										2	לא להתעסק
SVT-39	Shivta	Tepper, Bar-Oz and Gini	Daniel Fuks	2016-2020	M	564	5594		7	9	בלתי				Apiaceae	סוככיים					2	דמוי כלך
SVT-39	Shivta	Tepper, Bar-Oz and Gini	Daniel Fuks	2016-2020	M	564	5594		8	10	גללים										2
SVT-39	Shivta	Tepper, Bar-Oz and Gini	Daniel Fuks	2016-2020	M	564	5594		3	11	זית אירופאי	Olea europaea	שבר גלעין	stone fragment	Oleaceae	זיתיים					2	heavy f
SVT-39	Shivta	Tepper, Bar-Oz and Gini	Daniel Fuks	2016-2020	M	564	5594		7	12	בלתי										2	heavy f	לא להתעסק
SVT-40	Shivta	Tepper, Bar-Oz and Gini	Daniel Fuks	2016-2020	M	564	5595		1	1	שעורה	Hordeum	גרגיר	grain	Graminae	דגניים	2		2	2	2	אחד מפוחם ואחד לא
SVT-40	Shivta	Tepper, Bar-Oz and Gini	Daniel Fuks	2016-2020	M	564	5595		1	2	חיטה	Triticum	גרגיר	grain	Graminae	דגניים	1		1		2
SVT-40	Shivta	Tepper, Bar-Oz and Gini	Daniel Fuks	2016-2020	M	564	5595		3	3	גפן	Vitis vinifera	חרצן	pip	Vitaceae	גפניים	4		4	4	2
SVT-40	Shivta	Tepper, Bar-Oz and Gini	Daniel Fuks	2016-2020	M	564	5595		1	4			שברי גרגיר	grain fragments	Graminae	דגניים	18		18		2
SVT-40	Shivta	Tepper, Bar-Oz and Gini	Daniel Fuks	2016-2020	M	564	5595		3	5	מתנן	Thymelaea	פרי	fruit	Thymelaeaceae	מתנניים	2		2		2
SVT-40	Shivta	Tepper, Bar-Oz and Gini	Daniel Fuks	2016-2020	M	564	5595		1	6			פרקי דגן	culm node	Graminae	דגניים	10		10		2
SVT-40	Shivta	Tepper, Bar-Oz and Gini	Daniel Fuks	2016-2020	M	564	5595		1	7			חלקי שדרה		Graminae	דגניים	12		12		1
SVT-40	Shivta	Tepper, Bar-Oz and Gini	Daniel Fuks	2016-2020	M	564	5595		1	8	דגני		גרגיר	grain	Graminae	דגניים	1		1		1	להגדרה
SVT-40	Shivta	Tepper, Bar-Oz and Gini	Daniel Fuks	2016-2020	M	564	5595		1	9			גרגיר	grain	Graminae	דגניים	1		1		1	יואל: לא להתעסק
SVT-40	Shivta	Tepper, Bar-Oz and Gini	Daniel Fuks	2016-2020	M	564	5595		6	10	חיעד	Aizoon hispanicum	זרע	seed	Aizoaceae	חיעדיים	2		2		1
SVT-40	Shivta	Tepper, Bar-Oz and Gini	Daniel Fuks	2016-2020	M	564	5595		6	11	גלעינית/עכנאי?		זרע	seed	Boraginaceae	זיפניים	1		1		1
SVT-40	Shivta	Tepper, Bar-Oz and Gini	Daniel Fuks	2016-2020	M	564	5595		6	12	ארכוביתים										1	להגדרה
SVT-40	Shivta	Tepper, Bar-Oz and Gini	Daniel Fuks	2016-2020	M	564	5595		3	13	גפן	Vitis vinifera	עוקץ	pedicel	Vitaceae	גפניים	9		9		1
SVT-40	Shivta	Tepper, Bar-Oz and Gini	Daniel Fuks	2016-2020	M	564	5595		6	14	חלמית?		פרודה		Malvaceae	חלמיתיים	20		20		1	לא מפוחם, כנראה רצנטי
SVT-40	Shivta	Tepper, Bar-Oz and Gini	Daniel Fuks	2016-2020	M	564	5595		6	15	ציפורני החתול	Calendula sp.	פרי	fruit	Asteraceae	מורכבים					1	לא מפוחם, כנראה רצנטי
SVT-40	Shivta	Tepper, Bar-Oz and Gini	Daniel Fuks	2016-2020	M	564	5595		1	16			פרקי דגן	culm node	Graminae	דגניים					1	לא מפוחם, כנראה רצנטי
SVT-40	Shivta	Tepper, Bar-Oz and Gini	Daniel Fuks	2016-2020	M	564	5595		1	17			חלקי שדרה		Graminae	דגניים					1
SVT-40	Shivta	Tepper, Bar-Oz and Gini	Daniel Fuks	2016-2020	M	564	5595			18	בלתי										1	שברים/קליפות	לחזור בשביל הדבר המוזר מחלוצה ונתיב הגדוג
SVT-40	Shivta	Tepper, Bar-Oz and Gini	Daniel Fuks	2016-2020	M	564	5595			19	בלתי										1	אולי בר זיהוי
SVT-40	Shivta	Tepper, Bar-Oz and Gini	Daniel Fuks	2016-2020	M	564	5595			20	בלתי										1	לא להתעסק
SVT-40	Shivta	Tepper, Bar-Oz and Gini	Daniel Fuks	2016-2020	M	564	5595			21	בלתי										1	אולי בוצין
SVT-40	Shivta	Tepper, Bar-Oz and Gini	Daniel Fuks	2016-2020	M	564	5595			22	בלתי										1	לנסות לחבר
SVT-40	Shivta	Tepper, Bar-Oz and Gini	Daniel Fuks	2016-2020	M	564	5595			23	בלתי										1	קטנית?
SVT-40	Shivta	Tepper, Bar-Oz and Gini	Daniel Fuks	2016-2020	M	564	5595			24	בלתי										1	אולי חבלבל שדוף מאוד
SVT-40	Shivta	Tepper, Bar-Oz and Gini	Daniel Fuks	2016-2020	M	564	5595			25	בלתי										1
SVT-40	Shivta	Tepper, Bar-Oz and Gini	Daniel Fuks	2016-2020	M	564	5595			26	בלתי										1	קטן ובעייתי.זיפני?מורכב?
SVT-40	Shivta	Tepper, Bar-Oz and Gini	Daniel Fuks	2016-2020	M	564	5595			27	גללים										1	מעניין
SVT-40	Shivta	Tepper, Bar-Oz and Gini	Daniel Fuks	2016-2020	M	564	5595			28	גללים										1
SVT-40	Shivta	Tepper, Bar-Oz and Gini	Daniel Fuks	2016-2020	M	564	5595			29	רצנטי										1
SVT-41	Shivta	Tepper, Bar-Oz and Gini	Daniel Fuks	2016-2020	M	567	5603		1	1	חיטה/שעורה	Hordeum/Triticum	גרגיר	grain	Graminae	דגניים	2		2		2
SVT-41	Shivta	Tepper, Bar-Oz and Gini	Daniel Fuks	2016-2020	M	567	5603		3	2	גפן	Vitis vinifera	חרצן	pip	Vitaceae	גפניים	3		3	3	2
SVT-41	Shivta	Tepper, Bar-Oz and Gini	Daniel Fuks	2016-2020	M	567	5603		1	3			פרקי דגן	culm node	Graminae	דגניים	1		1		2
SVT-41	Shivta	Tepper, Bar-Oz and Gini	Daniel Fuks	2016-2020	M	567	5603		1	4			חלקי שדרה		Graminae	דגניים	2		2		2
SVT-41	Shivta	Tepper, Bar-Oz and Gini	Daniel Fuks	2016-2020	M	567	5603			5	עפץ?						1		1		2	יואל ראה.
SVT-41	Shivta	Tepper, Bar-Oz and Gini	Daniel Fuks	2016-2020	M	567	5603			6	בלתי										2
SVT-41	Shivta	Tepper, Bar-Oz and Gini	Daniel Fuks	2016-2020	M	567	5603		1	7	שעורה תרבותית/התבור	Hordeum	גרגיר	grain	Graminae	דגניים	7		7		1
SVT-41	Shivta	Tepper, Bar-Oz and Gini	Daniel Fuks	2016-2020	M	567	5603		1	8	שעורה דו-טורית/התבור	Hordeum vulgare disticum/spontaneum	פרק ציר שיבולת	rachis fragments	Graminae	דגניים	2		2		1
SVT-41	Shivta	Tepper, Bar-Oz and Gini	Daniel Fuks	2016-2020	M	567	5603			9	שעורה	Hordeum sp.	פרק ציר שיבולת	rachis fragments	Graminae	דגניים	1		1		1
SVT-41	Shivta	Tepper, Bar-Oz and Gini	Daniel Fuks	2016-2020	M	567	5603			10	חיטה טטרפלוידית	Triticum turgidum s.l.	פרק ציר שיבולת	rachis fragments	Graminae	דגניים	5		5		1
SVT-41	Shivta	Tepper, Bar-Oz and Gini	Daniel Fuks	2016-2020	M	567	5603		1	11	חיטה	Triticum	פרק ציר שיבולת	rachis fragments	Graminae	דגניים	1		1		1
SVT-41	Shivta	Tepper, Bar-Oz and Gini	Daniel Fuks	2016-2020	M	567	5603		1	12	חיטה/שעורה	Hordeum/Triticum	פרק ציר שיבולת	rachis fragments	Graminae	דגניים	14		14		1	חצי לא מפוחם
SVT-41	Shivta	Tepper, Bar-Oz and Gini	Daniel Fuks	2016-2020	M	567	5603			13			פרק גבעול	culm node	Graminae	דגניים	7		7		1
SVT-41	Shivta	Tepper, Bar-Oz and Gini	Daniel Fuks	2016-2020	M	567	5603			14			שרשי דגן	roots	Graminae	דגניים	3		3		1
SVT-41	Shivta	Tepper, Bar-Oz and Gini	Daniel Fuks	2016-2020	M	567	5603		1	15			שברי מלען		Graminae	דגניים					1
SVT-41	Shivta	Tepper, Bar-Oz and Gini	Daniel Fuks	2016-2020	M	567	5603		1	16	cf. זון אשון	cf. Lolium rigidum	גרגיר	grain	Graminae	דגניים	2		2		1	זון?
SVT-41	Shivta	Tepper, Bar-Oz and Gini	Daniel Fuks	2016-2020	M	567	5603			17	דגני		גרגיר	grain	Graminae	דגניים	1		1		1	אולי זון??
SVT-41	Shivta	Tepper, Bar-Oz and Gini	Daniel Fuks	2016-2020	M	567	5603			18	גפן	Vitis vinifera	שבר חרצן	pip fragment	Vitaceae	גפניים					1
SVT-41	Shivta	Tepper, Bar-Oz and Gini	Daniel Fuks	2016-2020	M	567	5603		1	19	גפן	Vitis vinifera	עוקץ	pedicel	Vitaceae	גפניים	14		14		1	לא מפוחם
SVT-41	Shivta	Tepper, Bar-Oz and Gini	Daniel Fuks	2016-2020	M	567	5603		1	20	פיקוס התאנה	Ficus carica	אגוזית בציפה	achenes	Moraceae	תותיים	8		8		1	לא מפוחם
SVT-41	Shivta	Tepper, Bar-Oz and Gini	Daniel Fuks	2016-2020	M	567	5603			21	פרפרני להגדרה		זרע	seed	Fabaceae	פרפרניים	1		1		1	השושרון התנתק אך נמצא במבחנה
SVT-41	Shivta	Tepper, Bar-Oz and Gini	Daniel Fuks	2016-2020	M	567	5603			22	גרגרנית ערבית?	Trigonella arabica	זרע	seed	Fabaceae	פרפרניים	1		1		1
SVT-41	Shivta	Tepper, Bar-Oz and Gini	Daniel Fuks	2016-2020	M	567	5603		1	23	פרפרני		זרע	seed	Fabaceae	פרפרניים	2		2		1
SVT-41	Shivta	Tepper, Bar-Oz and Gini	Daniel Fuks	2016-2020	M	567	5603		1	24	ארנבית שרועה	Arnebia decumbrens	זרע	seed	Boraginaceae	זיפניים	1		1		1
SVT-41	Shivta	Tepper, Bar-Oz and Gini	Daniel Fuks	2016-2020	M	567	5603			25	מתנן שעיר	Thymelaea hirsuta	אגוזית	nutlet	Thymelaeaceae	מתנניים	2		2		1
SVT-41	Shivta	Tepper, Bar-Oz and Gini	Daniel Fuks	2016-2020	M	567	5603			26	מתנן שעיר	Thymelaea hirsuta	עלה	leaf	Thymelaeaceae	מתנניים	50		50		1
SVT-41	Shivta	Tepper, Bar-Oz and Gini	Daniel Fuks	2016-2020	M	567	5603		1	27	מתנן שעיר	Thymelaea hirsuta	ניצן	bud	Thymelaeaceae	מתנניים	1		1		1
SVT-41	Shivta	Tepper, Bar-Oz and Gini	Daniel Fuks	2016-2020	M	567	5603		1	28	עירית	Asphodelus sp.	זרע	seed			2		2		1	להשתמש במחברת
SVT-41	Shivta	Tepper, Bar-Oz and Gini	Daniel Fuks	2016-2020	M	567	5603			29	צלע השור החרוזה	Bupleurum lancifolium	פרודה	mericarp	Umbelliferae	סוככיים	2		2		1	מח' 2 עמ' 82
SVT-41	Shivta	Tepper, Bar-Oz and Gini	Daniel Fuks	2016-2020	M	567	5603			30	בן-שלח מנוצה	Reboudia pinnata	תרמיל	pod	Brassicaceae	מצליבים	1		1		1	זיהוי לפי קצה תרמיל בודד
SVT-41	Shivta	Tepper, Bar-Oz and Gini	Daniel Fuks	2016-2020	M	567	5603			31	חיעד ספרדי	Aizoon hispanicum	זרע	seed	Aizoaceae	חיעדיים	1		1		1
SVT-41	Shivta	Tepper, Bar-Oz and Gini	Daniel Fuks	2016-2020	M	567	5603			32	ציפורני החתול	Calendula sp.					1		1		1
SVT-41	Shivta	Tepper, Bar-Oz and Gini	Daniel Fuks	2016-2020	M	567	5603		1	33	רכפה מגובששת?	Reseda	זרע	seed	Resedaceae	רכפתיים	1		1		1	נראה לי מגובששת - מח' 2 עמ' 82
SVT-41	Shivta	Tepper, Bar-Oz and Gini	Daniel Fuks	2016-2020	M	567	5603		1	34	פרגה	Glaucium sp.	זרע	seed	Papaveraceae	פרגיים					1	למדוד ריבועי הרשת
SVT-41	Shivta	Tepper, Bar-Oz and Gini	Daniel Fuks	2016-2020	M	567	5603			35	פרג	Papaver sp.	זרע	seed	Papaveraceae	פרגיים					1	יש מצב לתרבותי. ראו עמ' 97 ו-83 במח' 2
SVT-41	Shivta	Tepper, Bar-Oz and Gini	Daniel Fuks	2016-2020	M	567	5603			36	שבר לבן	Peganum harmala	זרע	seed	Zygophyllaceae	זוגניים	4		4		1
SVT-41	Shivta	Tepper, Bar-Oz and Gini	Daniel Fuks	2016-2020	M	567	5603			37	בלתי?		זרע	seed			1		1		1	אם לא רכפה, לחפש ציפורנית וציפורניים בכלל
SVT-41	Shivta	Tepper, Bar-Oz and Gini	Daniel Fuks	2016-2020	M	567	5603			38	גבסנית ערבית	Gypsophila capillaris	זרע	seed	Caryophyllaceae	ציפורניים	1		1		1	מח' 2, עמ' 97
SVT-41	Shivta	Tepper, Bar-Oz and Gini	Daniel Fuks	2016-2020	M	567	5603		1	39	גזר יושב?		זרע	seed			1		1		1
SVT-41	Shivta	Tepper, Bar-Oz and Gini	Daniel Fuks	2016-2020	M	567	5603		1	40	גבסנית שעירה	Gypsophila pilosa	זרע	seed	Caryophyllaceae	ציפורניים	3		3		1	מח' 2, עמ' 97
SVT-41	Shivta	Tepper, Bar-Oz and Gini	Daniel Fuks	2016-2020	M	567	5603			41	סוככי?		פרודה	mericarp		סוככיים	1		1		1	להמשך
SVT-41	Shivta	Tepper, Bar-Oz and Gini	Daniel Fuks	2016-2020	M	567	5603			42	בלתי		זרע	seed							1	להמשך
SVT-41	Shivta	Tepper, Bar-Oz and Gini	Daniel Fuks	2016-2020	M	567	5603			43	פרק סלקי- חמד?		פרק			סלקיים	4		4		1	להמשך
SVT-41	Shivta	Tepper, Bar-Oz and Gini	Daniel Fuks	2016-2020	M	567	5603		1	44	בלתי		זרע	seed							1	להמשך
SVT-41	Shivta	Tepper, Bar-Oz and Gini	Daniel Fuks	2016-2020	M	567	5603		1	45	בלתי										1	מאד קטן, לא להתעסק בינתיים
SVT-41	Shivta	Tepper, Bar-Oz and Gini	Daniel Fuks	2016-2020	M	567	5603			46	גלל										1	רק חלק קטן נלקח. הדגימה מאד עשירה בגללים
SVT-41	Shivta	Tepper, Bar-Oz and Gini	Daniel Fuks	2016-2020	M	567	5603			47	בלתי-שונות										1
SVT-41	Shivta	Tepper, Bar-Oz and Gini	Daniel Fuks	2016-2020	M	567	5603			48	בלתי										1	למעיכה
SVT-41	Shivta	Tepper, Bar-Oz and Gini	Daniel Fuks	2016-2020	M	567	5603			49	גפן	Vitis vinifera	שבר חרצן	pip fragment	Vitaceae	גפניים	1		1		0.5
SVT-41	Shivta	Tepper, Bar-Oz and Gini	Daniel Fuks	2016-2020	M	567	5603			50	פיקוס התאנה	Ficus carica	אגוזית	nutlet			7		7		0.5
SVT-41	Shivta	Tepper, Bar-Oz and Gini	Daniel Fuks	2016-2020	M	567	5603			51	דגני			rachis	Graminae	דגניים	32		32		0.5
SVT-41	Shivta	Tepper, Bar-Oz and Gini	Daniel Fuks	2016-2020	M	567	5603			52	לחך	Plantago sp.	זרע	seed	Plantaginaceae	לחכיים	1		1		0.5
SVT-41	Shivta	Tepper, Bar-Oz and Gini	Daniel Fuks	2016-2020	M	567	5603			53	פרפרני קטן	Fabaceae		seed	Fabaceae	פרפרני	1		1		0.5
SVT-41	Shivta	Tepper, Bar-Oz and Gini	Daniel Fuks	2016-2020	M	567	5603			54	אשל הפרקים	Salsoleae		segment	Tamaricaceae	אשליים	6		6		0.5
SVT-41	Shivta	Tepper, Bar-Oz and Gini	Daniel Fuks	2016-2020	M	567	5603			55	אספרגולה	Spergula	זרע	seed	Caryophyllaceae	ציפורניים	1		1		0.5
SVT-41	Shivta	Tepper, Bar-Oz and Gini	Daniel Fuks	2016-2020	M	567	5603			56	סלק	Beta vulgaris	זרע	seed	Chenopodiaceae	סלקיים	1		1		0.5	להגדרה
SVT-41	Shivta	Tepper, Bar-Oz and Gini	Daniel Fuks	2016-2020	M	567	5603			57	כף אווז האשפות	Chenopodium sp.	זרע	seed	Chenopodiaceae	סלקיים	9		9		0.5
SVT-41	Shivta	Tepper, Bar-Oz and Gini	Daniel Fuks	2016-2020	M	567	5603			58	ציפרנית	Silene sp.	זרע	seed			1		1		0.5	להגדרה
SVT-41	Shivta	Tepper, Bar-Oz and Gini	Daniel Fuks	2016-2020	M	567	5603			59	בן-שלח	Erucaria microcarpa	זרע	seed	Brassicaceae	מצליבים	4		4		0.5
SVT-41	Shivta	Tepper, Bar-Oz and Gini	Daniel Fuks	2016-2020	M	567	5603			60	פרגה	Glaucium sp.	זרע	seed	Papaveraceae	פרגיים	2		2		0.5
SVT-41	Shivta	Tepper, Bar-Oz and Gini	Daniel Fuks	2016-2020	M	567	5603			61	שלוחית קירחת/שעירה	Andrachne telephioides	זרע	seed	Euphorbiaceae	חלבלוביים	2		2		0.5
SVT-41	Shivta	Tepper, Bar-Oz and Gini	Daniel Fuks	2016-2020	M	567	5603			62	פרג/ה	Papaver sp./Glaucium sp.	זרע	seed	Papaveraceae	פרגיים	2		2		0.5
SVT-41	Shivta	Tepper, Bar-Oz and Gini	Daniel Fuks	2016-2020	M	567	5603			63	גיבסנית?	Gypsophila	זרע	seed	Caryophyllaceae	ציפורניים	1		1		0.5
SVT-41	Shivta	Tepper, Bar-Oz and Gini	Daniel Fuks	2016-2020	M	567	5603			64	אהל מצוי	Mesembryanthmeum nodiflorum	זרע	seed	Aizoaceae	חיעדיים	1		1		0.5
SVT-41	Shivta	Tepper, Bar-Oz and Gini	Daniel Fuks	2016-2020	M	567	5603			65	רכפה	Reseda	זרע	seed	Resedaceae	רכפתיים	20		20		0.5	להגדרה
SVT-41	Shivta	Tepper, Bar-Oz and Gini	Daniel Fuks	2016-2020	M	567	5603			66	חיעד ספרדי	Aizoon hispanicum	זרע	seed	Aizoaceae	חיעדיים	9		9		0.5
SVT-41	Shivta	Tepper, Bar-Oz and Gini	Daniel Fuks	2016-2020	M	567	5603			67	מתנן שעיר	Thymelaea hirsuta	עלה	leaf	Thymelaeaceae	מתנניים	10s		20		0.5
SVT-41	Shivta	Tepper, Bar-Oz and Gini	Daniel Fuks	2016-2020	M	567	5603			68				culm node			2		2		0.5
SVT-41	Shivta	Tepper, Bar-Oz and Gini	Daniel Fuks	2016-2020	M	567	5603			69	יבלית מצויה	Cynodon dactylon		infertile floret	Gramineae	דגניים	3		3		0.5
SVT-41	Shivta	Tepper, Bar-Oz and Gini	Daniel Fuks	2016-2020	M	567	5603			70	יבלית מצויה	Cynodon dactylon	דגן	grain	Gramineae	דגניים	11		11		0.5
SVT-41	Shivta	Tepper, Bar-Oz and Gini	Daniel Fuks	2016-2020	M	567	5603			71	ליואל						4		4		0.5
SVT-41	Shivta	Tepper, Bar-Oz and Gini	Daniel Fuks	2016-2020	M	567	5603			72	דג - חולייה + שן			fish vertebra			3		3		0.5
SVT-41	Shivta	Tepper, Bar-Oz and Gini	Daniel Fuks	2016-2020	M	567	5603			73	חרק						11		11		0.5
SVT-41	Shivta	Tepper, Bar-Oz and Gini	Daniel Fuks	2016-2020	M	567	5603			74	חלמית?	Malva sp.		seed?			1		1		0.5
SVT-41	Shivta	Tepper, Bar-Oz and Gini	Daniel Fuks	2016-2020	M	567	5603			75	בלתי						8		8		0.5
SVT-42	Shivta	Tepper, Bar-Oz and Gini	Daniel Fuks	2016-2020	M	567	5603			76	בלתי - שונות										0.5	למיין
																					2
																			2049

## Sheet: שטח K
Lab #	Site	Excavator	Archaeobotanist	Year analyzed	Area	Locus	Basket	Vial no.	מין הצמח	Plant Latin name	איבר	Organ	משפחה	Family	Light Fraction -Quantity	Heavy Fraction - Quantity	Quantity calculated	Quantity	Fraction size (mm)	Notes	הערות	Min Height (cm)	Max Height (cm)
STV-143	Shivta	Tepper, Bar-Oz and Gini	Daniel Fuks	2016-2020	K	156	1594	4	דגני		גרגיר	grain	דגניים	Gramineae					2		לא נספר
STV-143	Shivta	Tepper, Bar-Oz and Gini	Daniel Fuks	2016-2020	K	156	1594	5	דגני להגדרה		גרגיר	grain	דגניים	Gramineae			1	1	2		שעורה?
STV-143	Shivta	Tepper, Bar-Oz and Gini	Daniel Fuks	2016-2020	K	156	1594	6	דגני להגדרה		גרגיר	grain	דגניים	Gramineae			1	1	2
STV-143	Shivta	Tepper, Bar-Oz and Gini	Daniel Fuks	2016-2020	K	156	1594	8	גפן	Vitis vinifera	עוקץ	pedicel	גפניים	Vitaceae			1	1	2
STV-143	Shivta	Tepper, Bar-Oz and Gini	Daniel Fuks	2016-2020	K	156	1594	9	גפן	Vitis vinifera	זג	exocarp	גפניים	Vitaceae					2		זגים לא נספרים
STV-143	Shivta	Tepper, Bar-Oz and Gini	Daniel Fuks	2016-2020	K	156	1594	10	חיטה/שעורה .cf	cf. Hordeum/Triticum	מפרק גבעול	culm node	דגניים	Gramineae			20	20	2
STV-143	Shivta	Tepper, Bar-Oz and Gini	Daniel Fuks	2016-2020	K	156	1594	11	חיטה/שעורה .cf	cf. Hordeum/Triticum	שורש דגן	culm root	דגניים	Gramineae			8	8	2
STV-143	Shivta	Tepper, Bar-Oz and Gini	Daniel Fuks	2016-2020	K	156	1594	12	חיטה/שעורה .cf	cf. Hordeum/Triticum	מפרק גבעול	culm node	דגניים	Gramineae			5	5	1
STV-143	Shivta	Tepper, Bar-Oz and Gini	Daniel Fuks	2016-2020	K	156	1594	13	cf. בקיית הכרשינה	cf. Vicia ervilia	זרע	seed	פרפרניים	Fabaceae			1	1	2		צורה ארבעונית, שורשון וטבורית במקום הנכון אך הכל שחוק מאד ויש טופחים ארבעוניים...
STV-143	Shivta	Tepper, Bar-Oz and Gini	Daniel Fuks	2016-2020	K	156	1594	14	זנב-עקרב שיכני?	Scorpiurus muricatus?	זרע	seed	פרפרניים	Fabaceae			1	1
STV-143	Shivta	Tepper, Bar-Oz and Gini	Daniel Fuks	2016-2020	K	156	1594	15	קטנית		פסיגים	cotyledon	פרפרניים	Fabaceae			5	5			ספירה לפי MNI כרגיל
STV-143	Shivta	Tepper, Bar-Oz and Gini	Daniel Fuks	2016-2020	K	156	1594	16	שעורה	Hordeum sp.	פרק ציר שיבולת	rachis fragment	דגניים	Gramineae			1	1	1
STV-143	Shivta	Tepper, Bar-Oz and Gini	Daniel Fuks	2016-2020	K	156	1594	17	חיטה	Triticum sp.	פרק עליון	apical rachis fragment	דגניים	Gramineae			1	1	1
STV-143	Shivta	Tepper, Bar-Oz and Gini	Daniel Fuks	2016-2020	K	156	1594	18	חיטה/שעורה	Hordeum/Triticum	צווארון	culm	דגניים	Gramineae			1	1	1
STV-143	Shivta	Tepper, Bar-Oz and Gini	Daniel Fuks	2016-2020	K	156	1594	19	חיטה טטרפלוידית	Triticum turgidum s.l.	פרק ציר שיבולת	rachis fragment	דגניים	Gramineae			8	8	1		אחד עם 3 פרקים, אחד עם 2
STV-143	Shivta	Tepper, Bar-Oz and Gini	Daniel Fuks	2016-2020	K	156	1594	20	??חיטת הלחם	Triticum aestivum s.l.??	פרק ציר שיבולת	rachis fragment	דגניים	Gramineae			1	1	1
STV-143	Shivta	Tepper, Bar-Oz and Gini	Daniel Fuks	2016-2020	K	156	1594	21	חיטה	Triticum sp.	פרק ציר שיבולת	rachis fragment	דגניים	Gramineae			3	3	1
STV-143	Shivta	Tepper, Bar-Oz and Gini	Daniel Fuks	2016-2020	K	156	1594	22	חיטה/שעורה	Hordeum/Triticum	פרק ציר שיבולת	rachis fragment	דגניים	Gramineae			11	11	1
STV-143	Shivta	Tepper, Bar-Oz and Gini	Daniel Fuks	2016-2020	K	156	1594	23	דגני		מלען	awn	דגניים	Gramineae			1	1	1
STV-143	Shivta	Tepper, Bar-Oz and Gini	Daniel Fuks	2016-2020	K	156	1594	24	דגני להגדרה		גרגיר	grain	דגניים	Gramineae			1	1	1
STV-143	Shivta	Tepper, Bar-Oz and Gini	Daniel Fuks	2016-2020	K	156	1594	25	מצליב		פרק תרמיל	siliqua fragment	מצליבים	Brassicaceae			1	1	1
STV-143	Shivta	Tepper, Bar-Oz and Gini	Daniel Fuks	2016-2020	K	156	1594	26	דגני		גרגיר	grain	דגניים	Gramineae			2	2	1
STV-143	Shivta	Tepper, Bar-Oz and Gini	Daniel Fuks	2016-2020	K	156	1594	27	מתנן שעיר	Thymelaea hirsuta	אגוזית	nutlet	מתנניים	Thymelaeaceae			1	1	2
STV-143	Shivta	Tepper, Bar-Oz and Gini	Daniel Fuks	2016-2020	K	156	1594	28	מתנן שעיר	Thymelaea hirsuta	עלה	leaf	מתנניים	Thymelaeaceae			3	3	1
STV-143	Shivta	Tepper, Bar-Oz and Gini	Daniel Fuks	2016-2020	K	156	1594	29	כף אווז/מלוח?		זרע	seed	סלקיים?	Chenopodiaceae?			1	1	1		רצנטי??
STV-143	Shivta	Tepper, Bar-Oz and Gini	Daniel Fuks	2016-2020	K	156	1594	30	בקיי	Viceae	זרע	seed	פרפרניים	Fabaceae			1	1	1
STV-143	Shivta	Tepper, Bar-Oz and Gini	Daniel Fuks	2016-2020	K	156	1594	31	בלתי		זרע	seed	פרפרניים	Fabaceae			1	1	1		לחבר בהמשך
STV-143	Shivta	Tepper, Bar-Oz and Gini	Daniel Fuks	2016-2020	K	156	1594	32	גרגרנית/תלתן	Trifolium/Trigonella	זרע	seed	פרפרניים	Fabaceae			2	2	1
STV-143	Shivta	Tepper, Bar-Oz and Gini	Daniel Fuks	2016-2020	K	156	1594	33	לחך	Plantago sp.	זרע	seed	לחכיים	Plantaginaceae			1	1	1
STV-143	Shivta	Tepper, Bar-Oz and Gini	Daniel Fuks	2016-2020	K	156	1594	34	Salsoleae	Salsoleae	פרקי גבעול	stem segments	סלקיים	Chenopodiaceae			2	2	1
STV-143	Shivta	Tepper, Bar-Oz and Gini	Daniel Fuks	2016-2020	K	156	1594	35	בלתי		שבר גלעין						3	3	1
STV-143	Shivta	Tepper, Bar-Oz and Gini	Daniel Fuks	2016-2020	K	156	1594	36	אמיך קוצני	Emex spinosa	פרי	fruiting perianth	ארכוביתיים	Polygonaceae			4	4	2
STV-143	Shivta	Tepper, Bar-Oz and Gini	Daniel Fuks	2016-2020	K	156	1594	37	אמיך קוצני	Emex spinosa	פרי	fruiting perianth	ארכוביתיים	Polygonaceae			1	1	1
STV-143	Shivta	Tepper, Bar-Oz and Gini	Daniel Fuks	2016-2020	K	156	1594	38	חלמית קטנת פרחים/חדת אונות	Malva parviflora/oxyloba	זרע	seed	חלמתיים	Malvaceae			1	1	1
STV-143	Shivta	Tepper, Bar-Oz and Gini	Daniel Fuks	2016-2020	K	156	1594	39	ליואל								1	1	2
STV-143	Shivta	Tepper, Bar-Oz and Gini	Daniel Fuks	2016-2020	K	156	1594	40	גללים												אחד כמעט שלם
STV-143	Shivta	Tepper, Bar-Oz and Gini	Daniel Fuks	2016-2020	K	156	1594	41	בלתי? גלל?
STV-143	Shivta	Tepper, Bar-Oz and Gini	Daniel Fuks	2016-2020	K	156	1594	42	בלתי-שונות
STV-143	Shivta	Tepper, Bar-Oz and Gini	Daniel Fuks	2016-2020	K	156	1594	43	חרק										1
STV-143	Shivta	Tepper, Bar-Oz and Gini	Daniel Fuks	2016-2020	K	156	1594	44	חלמית רצנטית?		פרודה	mericarp	חלמתיים	Malvaceae			15	15	1		לא מפוחם
STV-143	Shivta	Tepper, Bar-Oz and Gini	Daniel Fuks	2016-2020	K	156	1594	45	רצנטי?												לא מפוחם
STV-144	Shivta	Tepper, Bar-Oz and Gini	Daniel Fuks	2016-2020	K	160	1623	5	שברי דגני		גרגיר	grain	דגניים	Gramineae					2
STV-144	Shivta	Tepper, Bar-Oz and Gini	Daniel Fuks	2016-2020	K	160	1623	7	גפן	Vitis vinifera	עוקץ	pedicel	גפניים	Vitaceae			2	2	2
STV-144	Shivta	Tepper, Bar-Oz and Gini	Daniel Fuks	2016-2020	K	160	1623	8	גפן	Vitis vinifera	זג	exocarp	גפניים	Vitaceae					2
STV-144	Shivta	Tepper, Bar-Oz and Gini	Daniel Fuks	2016-2020	K	160	1623	9	שעורה שש-טורית	Hordeum vulgare hexastichum	פרק ציר שיבולת	rachis fragment	דגניים	Gramineae			1	1	2
STV-144	Shivta	Tepper, Bar-Oz and Gini	Daniel Fuks	2016-2020	K	160	1623	10	חיטה/שעורה .cf	cf. Hordeum/Triticum	שורש דגן	culm root	דגניים	Gramineae			2	2	2
STV-144	Shivta	Tepper, Bar-Oz and Gini	Daniel Fuks	2016-2020	K	160	1623	11	חיטה/שעורה .cf	cf. Hordeum/Triticum	מפרק גבעול	culm node	דגניים	Gramineae			7	7	2
STV-144	Shivta	Tepper, Bar-Oz and Gini	Daniel Fuks	2016-2020	K	160	1623	12	בקיית הכרשינה .cf	cf. Vicia ervilia	פסיגים	cotyledon	פרפרניים	Fabaceae			4	4	2
STV-144	Shivta	Tepper, Bar-Oz and Gini	Daniel Fuks	2016-2020	K	160	1623	13	נונאה?	Nonea?	זרע	seed	זיפניים	Boraginaceae			1	1	2
STV-144	Shivta	Tepper, Bar-Oz and Gini	Daniel Fuks	2016-2020	K	160	1623	14	תמר מצוי	Phoenix dactylifera	גלעין	stone	דקליים	Palmae			1	1	2
STV-144	Shivta	Tepper, Bar-Oz and Gini	Daniel Fuks	2016-2020	K	160	1623	15	זית אירופאי	Olea europaea	גלעין	stone	זיתיים	Oleaceae			2	2	2
STV-144	Shivta	Tepper, Bar-Oz and Gini	Daniel Fuks	2016-2020	K	160	1623	16	פיקוס התאנה?	Ficus carica?	אגוזית	achene	תותיים?	Moraceae?			1	1	2
STV-144	Shivta	Tepper, Bar-Oz and Gini	Daniel Fuks	2016-2020	K	160	1623	17	Salsoleae	Salsoleae	פרקי גבעול	stem segments	סלקיים	Chenopodiaceae			1	1	2
STV-144	Shivta	Tepper, Bar-Oz and Gini	Daniel Fuks	2016-2020	K	160	1623	18	אמיך קוצני	Emex spinosa	פרי	fruiting perianth	ארכוביתיים	Polygonaceae			2	2	2		לא מפוחם
STV-144	Shivta	Tepper, Bar-Oz and Gini	Daniel Fuks	2016-2020	K	160	1623	19	ליואל								1	1	2
STV-144	Shivta	Tepper, Bar-Oz and Gini	Daniel Fuks	2016-2020	K	160	1623	20	גלל								1	1	2		שלם ושמור!
STV-144	Shivta	Tepper, Bar-Oz and Gini	Daniel Fuks	2016-2020	K	160	1623	21	רצנטי?										2
STV-144	Shivta	Tepper, Bar-Oz and Gini	Daniel Fuks	2016-2020	K	160	1623	22	בלתי-שונות										2
SVT-142	Shivta	Tepper, Bar-Oz and Gini	Daniel Fuks	2016-2020	K	153	1588	1	שעורה תרבותית	Hordeum vulgare	גרגיר	grain	דגניים	Gramineae			18	18	2
SVT-142	Shivta	Tepper, Bar-Oz and Gini	Daniel Fuks	2016-2020	K	153	1588	2	חיטה	Triticum sp.	גרגיר	grain	דגניים	Gramineae			30	30	2
SVT-142	Shivta	Tepper, Bar-Oz and Gini	Daniel Fuks	2016-2020	K	153	1588	3	חיטה/שעורה	Hordeum/Triticum	גרגיר	grain	דגניים	Gramineae			2	2	2
SVT-142	Shivta	Tepper, Bar-Oz and Gini	Daniel Fuks	2016-2020	K	153	1588	4	גפן	Vitis vinifera	חרצן	pip	גפניים	Vitaceae			16	16	2
SVT-142	Shivta	Tepper, Bar-Oz and Gini	Daniel Fuks	2016-2020	K	153	1588	5	גפן	Vitis vinifera	עוקץ	pedicel	גפניים	Vitaceae			5	5	2
SVT-142	Shivta	Tepper, Bar-Oz and Gini	Daniel Fuks	2016-2020	K	153	1588	6	גפן	Vitis vinifera	ענב לא מפותח	undeveloped grape	גפניים	Vitaceae			1	1	2
SVT-142	Shivta	Tepper, Bar-Oz and Gini	Daniel Fuks	2016-2020	K	153	1588	7	גפן	Vitis vinifera	זג	exocarp	גפניים	Vitaceae					2		32 חתיכות
SVT-142	Shivta	Tepper, Bar-Oz and Gini	Daniel Fuks	2016-2020	K	153	1588	8	שעורה	Hordeum vulgare	פרק ציר שיבולת	rachis fragment	דגניים	Gramineae			1	1	2
SVT-142	Shivta	Tepper, Bar-Oz and Gini	Daniel Fuks	2016-2020	K	153	1588	9	שעורה שש-טורית	Hordeum vulgare hexastichum	פרק ציר שיבולת	rachis fragment	דגניים	Gramineae			3	3	2		אחד עם 5 פרקים
SVT-142	Shivta	Tepper, Bar-Oz and Gini	Daniel Fuks	2016-2020	K	153	1588	10	חיטה טטרפלוידית	Triticum turgidum s.l.	פרק ציר שיבולת	rachis fragment	דגניים	Gramineae			5	5	2		כולל אחד עם פרק ראשון ועוד 5 פרקים, אחד עם 4 פרקים, אחד עם 3
SVT-142	Shivta	Tepper, Bar-Oz and Gini	Daniel Fuks	2016-2020	K	153	1588	11	חיטה	Triticum sp.	פרק ראשון	first rachis	דגניים	Gramineae			1	1	2		עם 2 פרקים. חשש לחיטת הלחם
SVT-142	Shivta	Tepper, Bar-Oz and Gini	Daniel Fuks	2016-2020	K	153	1588	12	חיטה/שעורה	Hordeum/Triticum	פרק ציר שיבולת	rachis fragment	דגניים	Gramineae			1	1	2
SVT-142	Shivta	Tepper, Bar-Oz and Gini	Daniel Fuks	2016-2020	K	153	1588	13	דגני		שורש דגן	culm root	דגניים	Gramineae			3	3	2
SVT-142	Shivta	Tepper, Bar-Oz and Gini	Daniel Fuks	2016-2020	K	153	1588	14	דגני		מפרק גבעול	culm node	דגניים	Gramineae			18	18	2
SVT-142	Shivta	Tepper, Bar-Oz and Gini	Daniel Fuks	2016-2020	K	153	1588	15	קטניות להגדרה		זרע	seed	פרפרניים	Fabaceae			8	8	2
SVT-142	Shivta	Tepper, Bar-Oz and Gini	Daniel Fuks	2016-2020	K	153	1588	16	קטנית		פסיגים	cotyledon	פרפרניים	Fabaceae			4	4	2
SVT-142	Shivta	Tepper, Bar-Oz and Gini	Daniel Fuks	2016-2020	K	153	1588	17	קטנית?		זרע	seed	פרפרניים	Fabaceae			1	1	2
SVT-142	Shivta	Tepper, Bar-Oz and Gini	Daniel Fuks	2016-2020	K	153	1588	18	בקיית הכרשינה	cf. Vicia ervilia	פסיגים	cotyledon	פרפרניים	Fabaceae			5	5	2
SVT-142	Shivta	Tepper, Bar-Oz and Gini	Daniel Fuks	2016-2020	K	153	1588	19	בקיים	Vicieae	זרע	seed	פרפרניים	Fabaceae			1	1	2		compare to NZN 144-11, HLZ 16-31
SVT-142	Shivta	Tepper, Bar-Oz and Gini	Daniel Fuks	2016-2020	K	153	1588	20	תמר מצוי	Phoenix dactylifera	שבר גלעין	stone fragment	דקליים	Palmae			1	1	2
SVT-142	Shivta	Tepper, Bar-Oz and Gini	Daniel Fuks	2016-2020	K	153	1588	21	תמר מצוי	Phoenix dactylifera	חותם	?	דקליים	Palmae			1	1	2
SVT-142	Shivta	Tepper, Bar-Oz and Gini	Daniel Fuks	2016-2020	K	153	1588	22	cf. חרוב מצוי	cf. Ceratonia siliqua	זרע	seed	כליליים	Caesalpiniaceae			1	1	2
SVT-142	Shivta	Tepper, Bar-Oz and Gini	Daniel Fuks	2016-2020	K	153	1588	23	מורכבים		תפרחת	inflorescence	מורכבים	Asteraceae			1	1?	2
SVT-142	Shivta	Tepper, Bar-Oz and Gini	Daniel Fuks	2016-2020	K	153	1588	24	מתנן שעיר	Thymelaea hirsuta	עלים	leaf	מתנניים	Thymelaceae			1	?	2
SVT-142	Shivta	Tepper, Bar-Oz and Gini	Daniel Fuks	2016-2020	K	153	1588	25	אמיך קוצני	Emex spinosa	פרי	fruiting perianth	ארכוביתיים	Polygonaceae			1	?	2
SVT-142	Shivta	Tepper, Bar-Oz and Gini	Daniel Fuks	2016-2020	K	153	1588	26	חבלבל להגדרה	Convolvulus			חבלבליים	Convolvulaceae			1	1	2
SVT-142	Shivta	Tepper, Bar-Oz and Gini	Daniel Fuks	2016-2020	K	153	1588	27	Salsoleae	Salsoleae	פרק		סלקיים?	Chenopodiaceae			1	1	2
SVT-142	Shivta	Tepper, Bar-Oz and Gini	Daniel Fuks	2016-2020	K	153	1588	28	בלתי								1	1	2
SVT-142	Shivta	Tepper, Bar-Oz and Gini	Daniel Fuks	2016-2020	K	153	1588	29	תאנה או פרפרני?	Ficus?	אגוזית	achene	תותיים	Moraceae			1	1	2
SVT-142	Shivta	Tepper, Bar-Oz and Gini	Daniel Fuks	2016-2020	K	153	1588	30	חרק? ליואל								1	1	2
SVT-142	Shivta	Tepper, Bar-Oz and Gini	Daniel Fuks	2016-2020	K	153	1588	31	ליואל								6	6	2
SVT-142	Shivta	Tepper, Bar-Oz and Gini	Daniel Fuks	2016-2020	K	153	1588	32	גלל										2		יש חצי גלל ועוד שברים
SVT-142	Shivta	Tepper, Bar-Oz and Gini	Daniel Fuks	2016-2020	K	153	1588	33	רכפה בגלל?	Reseda?	Reseda		רכפתיים	Resedaceae			1	1	2
SVT-142	Shivta	Tepper, Bar-Oz and Gini	Daniel Fuks	2016-2020	K	153	1588	34	בלתי-שונות										2
SVT-142	Shivta	Tepper, Bar-Oz and Gini	Daniel Fuks	2016-2020	K	153	1588	35	גפן	Vitis vinifera	חרצן	pip	גפניים	Vitaceae			3	3	1		מתבסס על ספירת עוקץ חרצן
SVT-142	Shivta	Tepper, Bar-Oz and Gini	Daniel Fuks	2016-2020	K	153	1588	36	מתנן שעיר	Thymelaea hirsuta	אגוזית	achene	מתנניים	Thymelaeaceae			1	1	1
SVT-142	Shivta	Tepper, Bar-Oz and Gini	Daniel Fuks	2016-2020	K	153	1588	37	מתנן שעיר	Thymelaea hirsuta	עלה	leaf	מתנניים	Thymelaeaceae			3	3	1
SVT-142	Shivta	Tepper, Bar-Oz and Gini	Daniel Fuks	2016-2020	K	153	1588	38	שעורה	Hordeum vulgare	פרק ציר שיבולת	rachis	דגניים	Gramineae			1	1	1
SVT-142	Shivta	Tepper, Bar-Oz and Gini	Daniel Fuks	2016-2020	K	153	1588	39	שעורה שש-טורית	Hordeum vulgare hexastichum	פרק ציר שיבולת	rachis	דגניים	Gramineae			1	1	1
SVT-142	Shivta	Tepper, Bar-Oz and Gini	Daniel Fuks	2016-2020	K	153	1588	40	דגני		מלען	awn	דגניים	Gramineae			2	2	1
SVT-142	Shivta	Tepper, Bar-Oz and Gini	Daniel Fuks	2016-2020	K	153	1588	41	חיטה	Triticum sp.	גרגיר	grain	דגניים	Gramineae			1	1	1
SVT-142	Shivta	Tepper, Bar-Oz and Gini	Daniel Fuks	2016-2020	K	153	1588	42	חיטה	Triticum sp.	פרק ציר שיבולת	rachis fragment	דגניים	Gramineae			2	2	1
SVT-142	Shivta	Tepper, Bar-Oz and Gini	Daniel Fuks	2016-2020	K	153	1588	43	חיטה טטרפלוידית	Triticum turgidum s.l.	פרק ציר שיבולת	rachis fragment	דגניים	Gramineae			6	6	1
SVT-142	Shivta	Tepper, Bar-Oz and Gini	Daniel Fuks	2016-2020	K	153	1588	44	דגני		פרק ציר שיבולת	rachis fragment	דגניים	Gramineae			5	5	1
SVT-142	Shivta	Tepper, Bar-Oz and Gini	Daniel Fuks	2016-2020	K	153	1588	45	דגני		גרגיר	grain	דגניים	Gramineae			1	1	1
SVT-142	Shivta	Tepper, Bar-Oz and Gini	Daniel Fuks	2016-2020	K	153	1588	46	דגן?		פרק?	culm node?	דגניים	Gramineae			1	1	1
SVT-142	Shivta	Tepper, Bar-Oz and Gini	Daniel Fuks	2016-2020	K	153	1588	47	ניצן? ליואל								1	1	1
SVT-142	Shivta	Tepper, Bar-Oz and Gini	Daniel Fuks	2016-2020	K	153	1588	48	ליואל בהמשך								1	1	1
SVT-142	Shivta	Tepper, Bar-Oz and Gini	Daniel Fuks	2016-2020	K	153	1588	49	שברי גללים										1
SVT-142	Shivta	Tepper, Bar-Oz and Gini	Daniel Fuks	2016-2020	K	153	1588	50	מצליב				מצליבים	Brassicaceae			1	1	1
SVT-142	Shivta	Tepper, Bar-Oz and Gini	Daniel Fuks	2016-2020	K	153	1588	51	בלתי								4	4	1		לעתיד
SVT-142	Shivta	Tepper, Bar-Oz and Gini	Daniel Fuks	2016-2020	K	153	1588	52	בלתי-שונות										1
SVT-143	Shivta	Tepper, Bar-Oz and Gini	Daniel Fuks	2016-2020	K	156	1594	1	שעורה	Hordeum vulgare	גרגיר	grain	דגניים	Gramineae			21	21	2
SVT-143	Shivta	Tepper, Bar-Oz and Gini	Daniel Fuks	2016-2020	K	156	1594	2	חיטה	Triticum sp.	גרגיר	grain	דגניים	Gramineae			18	18	2
SVT-143	Shivta	Tepper, Bar-Oz and Gini	Daniel Fuks	2016-2020	K	156	1594	3	חיטה/שעורה	Hordeum/Triticum	גרגיר	grain	דגניים	Gramineae			10	10	2
SVT-143	Shivta	Tepper, Bar-Oz and Gini	Daniel Fuks	2016-2020	K	156	1594	7	גפן	Vitis vinifera	חרצן	pip	גפניים	Vitaceae			16	16	2
SVT-144	Shivta	Tepper, Bar-Oz and Gini	Daniel Fuks	2016-2020	K	160	1623	1	שעורה	Hordeum vulgare	גרגיר	grain	דגניים	Gramineae			16	16	2
SVT-144	Shivta	Tepper, Bar-Oz and Gini	Daniel Fuks	2016-2020	K	160	1623	2	חיטה	Triticum sp.	גרגיר	grain	דגניים	Gramineae			18	18	2
SVT-144	Shivta	Tepper, Bar-Oz and Gini	Daniel Fuks	2016-2020	K	160	1623	3	חיטה/שעורה	Hordeum/Triticum	גרגיר	grain	דגניים	Gramineae			6	6	2
SVT-144	Shivta	Tepper, Bar-Oz and Gini	Daniel Fuks	2016-2020	K	160	1623	4	שעורה?		גרגיר	grain	דגניים	Gramineae			1	1	2
SVT-144	Shivta	Tepper, Bar-Oz and Gini	Daniel Fuks	2016-2020	K	160	1623	6	גפן	Vitis vinifera	חרצן	pip	גפניים	Vitaceae			7	7	2
SVT-145	Shivta	Tepper, Bar-Oz and Gini	Daniel Fuks	2016-2020	K	164	1648	1	שעורה תרבותית	Hordeum vulgare	גרגיר	grain	דגניים	Gramineae			238	238	2
SVT-145	Shivta	Tepper, Bar-Oz and Gini	Daniel Fuks	2016-2020	K	164	1648	2	חיטה	Triticum sp.	גרגיר	grain	דגניים	Gramineae			64	64	2
SVT-145	Shivta	Tepper, Bar-Oz and Gini	Daniel Fuks	2016-2020	K	164	1648	3	חיטה/שעורה	Hordeum/Triticum	גרגיר	grain	דגניים	Gramineae			92	92	2
SVT-145	Shivta	Tepper, Bar-Oz and Gini	Daniel Fuks	2016-2020	K	164	1648	4	דגני להגדרה		גרגיר	grain	דגניים	Gramineae			2	2	2
SVT-145	Shivta	Tepper, Bar-Oz and Gini	Daniel Fuks	2016-2020	K	164	1648	5	שברי דגני		גרגיר	grain	דגניים	Gramineae					2		לא נספר
SVT-145	Shivta	Tepper, Bar-Oz and Gini	Daniel Fuks	2016-2020	K	164	1648	6	גפן	Vitis vinifera	חרצן	pip	גפניים	Vitaceae			7	7	2
SVT-145	Shivta	Tepper, Bar-Oz and Gini	Daniel Fuks	2016-2020	K	164	1648	7	חיטה	Triticum sp.	פרק ציר שיבולת	rachis	דגניים	Gramineae			1	1	2
SVT-145	Shivta	Tepper, Bar-Oz and Gini	Daniel Fuks	2016-2020	K	164	1648	8	שעורה תרבותית	Hordeum vulgare	גרגיר וגלל	grain	דגניים	Gramineae			1	1	2		גרגיר שעורה בתוך גלל?
SVT-145	Shivta	Tepper, Bar-Oz and Gini	Daniel Fuks	2016-2020	K	164	1648	9	שעורה שש-טורית	Hordeum vulgare hexastichum	פרק ציר שיבולת	rachis fragment	דגניים	Gramineae			6	6	2
SVT-145	Shivta	Tepper, Bar-Oz and Gini	Daniel Fuks	2016-2020	K	164	1648	10	חיטה טטרפלוידית	Triticum turgidum s.l.	פרק ציר שיבולת	rachis fragment	דגניים	Gramineae			8	8	2
SVT-145	Shivta	Tepper, Bar-Oz and Gini	Daniel Fuks	2016-2020	K	164	1648	11	חיטה טטרפלוידית	Triticum turgidum s.l.	פרק ראשון	first rachis	דגניים	Gramineae			1	1	2
SVT-145	Shivta	Tepper, Bar-Oz and Gini	Daniel Fuks	2016-2020	K	164	1648	12	דגני להגדרה		גרגיר	grain	דגניים	Gramineae			1	1	2
SVT-145	Shivta	Tepper, Bar-Oz and Gini	Daniel Fuks	2016-2020	K	164	1648	13	חיטה/שעורה	Hordeum/Triticum	פרקי גבעול	culm node	דגניים	Gramineae			29	29	2
SVT-145	Shivta	Tepper, Bar-Oz and Gini	Daniel Fuks	2016-2020	K	164	1648	14	חיטה/שעורה	Hordeum/Triticum	שורש דגן	culm root	דגניים	Gramineae			9	9	2
SVT-145	Shivta	Tepper, Bar-Oz and Gini	Daniel Fuks	2016-2020	K	164	1648	15	חיטה/שעורה	Hordeum/Triticum	צווארון	collar	דגניים	Gramineae			1	1	2
SVT-145	Shivta	Tepper, Bar-Oz and Gini	Daniel Fuks	2016-2020	K	164	1648	16	בקיית הכרשינה	Vicia ervilia	פסיגים	cotyledon	פרפרניים	Fabaceae			4	4	2
SVT-145	Shivta	Tepper, Bar-Oz and Gini	Daniel Fuks	2016-2020	K	164	1648	17	עדשה	Lens culinaris	זרע	seed	פרפרניים	Fabaceae			1	1	2
SVT-145	Shivta	Tepper, Bar-Oz and Gini	Daniel Fuks	2016-2020	K	164	1648	18	קטנית		זרע	seed	פרפרניים	Fabaceae			1	1	2		לחבר בהמשך
SVT-145	Shivta	Tepper, Bar-Oz and Gini	Daniel Fuks	2016-2020	K	164	1648	19	קטנית		פסיג	cotyledon	פרפרניים	Fabaceae			1	1	2
SVT-145	Shivta	Tepper, Bar-Oz and Gini	Daniel Fuks	2016-2020	K	164	1648	20	אמיך קוצני	Emex spinosa	פרי	fruit	ארכוביתיים	Polygonaceae			3	3	2
SVT-145	Shivta	Tepper, Bar-Oz and Gini	Daniel Fuks	2016-2020	K	164	1648	21	Salsoleae	Salsoleae	פרקי גבעול	stem segments	סלקיים	Chenopodiaceae			9	9	2
SVT-145	Shivta	Tepper, Bar-Oz and Gini	Daniel Fuks	2016-2020	K	164	1648	22	בלתי										2
SVT-145	Shivta	Tepper, Bar-Oz and Gini	Daniel Fuks	2016-2020	K	164	1648	23	גללים										2
SVT-145	Shivta	Tepper, Bar-Oz and Gini	Daniel Fuks	2016-2020	K	164	1648	24	בלתי-שונות										2
SVT-146	Shivta	Tepper, Bar-Oz and Gini	Daniel Fuks	2016-2020	K	165	1673	1	שעורה תרבותית	Hordeum vulgare	גרגיר	grain	דגניים	Gramineae			63	63	2
SVT-146	Shivta	Tepper, Bar-Oz and Gini	Daniel Fuks	2016-2020	K	165	1673	2	חיטה	Triticum sp.	גרגיר	grain	דגניים	Gramineae			100	100	2
SVT-146	Shivta	Tepper, Bar-Oz and Gini	Daniel Fuks	2016-2020	K	165	1673	3	חיטה/שעורה	Hordeum/Triticum	גרגיר	grain	דגניים	Gramineae			23	23	2
SVT-146	Shivta	Tepper, Bar-Oz and Gini	Daniel Fuks	2016-2020	K	165	1673	4	שברי דגני		גרגיר	grain	דגניים	Gramineae					2
SVT-146	Shivta	Tepper, Bar-Oz and Gini	Daniel Fuks	2016-2020	K	165	1673	5	גפן	Vitis vinifera	חרצן	pip	גפניים	Vitaceae			36	36	2		לא נספר
SVT-146	Shivta	Tepper, Bar-Oz and Gini	Daniel Fuks	2016-2020	K	165	1673	6	גפן	Vitis vinifera	צימוק עם חרצן	pericarp	גפניים	Vitaceae			3	3	2
SVT-146	Shivta	Tepper, Bar-Oz and Gini	Daniel Fuks	2016-2020	K	165	1673	7	גפן?	Vitis vinifera??	?צימוק	pericarp?	גפניים?	Vitaceae?			3	3	2
SVT-146	Shivta	Tepper, Bar-Oz and Gini	Daniel Fuks	2016-2020	K	165	1673	8	גפן	Vitis vinifera	עוקץ	pedicel	גפניים	Vitaceae			9	9	2
SVT-146	Shivta	Tepper, Bar-Oz and Gini	Daniel Fuks	2016-2020	K	165	1673	9	גפן	Vitis vinifera	זג	exocarp	גפניים	Vitaceae					2		לא נספר
SVT-146	Shivta	Tepper, Bar-Oz and Gini	Daniel Fuks	2016-2020	K	165	1673	10	שעורה שש-טורית	Hordeum vulgare hexastichum	פרק ציר שיבולת	rachis fragment	דגניים	Gramineae			5	5	2
SVT-146	Shivta	Tepper, Bar-Oz and Gini	Daniel Fuks	2016-2020	K	165	1673	11	חיטה טטרפלוידית	Triticum turgidum s.l.	פרק ציר שיבולת	rachis fragment	דגניים	Gramineae			12	12	2		כולל 5 עם 2 פרקים
SVT-146	Shivta	Tepper, Bar-Oz and Gini	Daniel Fuks	2016-2020	K	165	1673	12	חיטה טטרפלוידית	Triticum turgidum s.l.	פרק ראשון	first rachis	דגניים	Gramineae			3	3	2		אחד עם 4 פרקים, ו-2 עם שני פרקים
SVT-146	Shivta	Tepper, Bar-Oz and Gini	Daniel Fuks	2016-2020	K	165	1673	13	חיטה טטרפלוידית	Triticum turgidum s.l.	צווארון פרק ראשון	collar and first rachis	דגניים	Gramineae			1	1	2		כולל ארבע פרקים
SVT-146	Shivta	Tepper, Bar-Oz and Gini	Daniel Fuks	2016-2020	K	165	1673	14	חיטת הלחם	Triticum aestivum s.l.	פרק ציר שיבולת	rachis fragment	דגניים	Gramineae			1	1	2
SVT-146	Shivta	Tepper, Bar-Oz and Gini	Daniel Fuks	2016-2020	K	165	1673	15	חיטה	Triticum sp.	פרק ראשון	first rachis	דגניים	Gramineae			1	1	2
SVT-146	Shivta	Tepper, Bar-Oz and Gini	Daniel Fuks	2016-2020	K	165	1673	16	חיטה/שעורה	Hordeum/Triticum	פרק ציר שיבולת	rachis fragment	דגניים	Gramineae			5	5	2
SVT-146	Shivta	Tepper, Bar-Oz and Gini	Daniel Fuks	2016-2020	K	165	1673	17	חיטה/שעורה	Hordeum/Triticum	פרקי גבעול	culm node	דגניים	Gramineae			67	67	2		פוצל ל-2 מבחנות
SVT-146	Shivta	Tepper, Bar-Oz and Gini	Daniel Fuks	2016-2020	K	165	1673	18	חיטה/שעורה	Hordeum/Triticum	שורש דגן	culm root	דגניים	Gramineae			10	10	2
SVT-146	Shivta	Tepper, Bar-Oz and Gini	Daniel Fuks	2016-2020	K	165	1673	19	תמר מצוי	Phoenix dactylifera	גלעין	stone	דקליים	Palmae			2	2	2
SVT-146	Shivta	Tepper, Bar-Oz and Gini	Daniel Fuks	2016-2020	K	165	1673	20	מתנן שעיר	Thymelaea hirsuta	עלה	leaf	מתנניים	Thymelaeaceae			5	5	2
SVT-146	Shivta	Tepper, Bar-Oz and Gini	Daniel Fuks	2016-2020	K	165	1673	21	מתנן שעיר	Thymelaea hirsuta	ענף עם עלים	stem with leaves	מתנניים	Thymelaeaceae			1	1	2
SVT-146	Shivta	Tepper, Bar-Oz and Gini	Daniel Fuks	2016-2020	K	165	1673	22	בקיי	Vicieae	זרע	seed	פרפרניים	Fabaceae			4	4	2
SVT-146	Shivta	Tepper, Bar-Oz and Gini	Daniel Fuks	2016-2020	K	165	1673	23	בקיי לחבר בהמשך	Vicieae	זרע	seed	פרפרניים	Fabaceae			5	5	2
SVT-146	Shivta	Tepper, Bar-Oz and Gini	Daniel Fuks	2016-2020	K	165	1673	24	בקיי	Vicieae	פסיגים	cotyledon	פרפרניים	Fabaceae			9	9	2		שווה ל-5 זרעים
SVT-146	Shivta	Tepper, Bar-Oz and Gini	Daniel Fuks	2016-2020	K	165	1673	25	בקיית הכרשינה	Vicia ervilia	פסיג וזרע	seed and cotyledon	פרפרניים	Fabaceae			12	12	2		כולל 10 זרעים ו-4 פסיגים
SVT-146	Shivta	Tepper, Bar-Oz and Gini	Daniel Fuks	2016-2020	K	165	1673	26	עדשה תרבותית	Lens culinaris	זרע	seed	פרפרניים	Fabaceae			5	5	2
SVT-146	Shivta	Tepper, Bar-Oz and Gini	Daniel Fuks	2016-2020	K	165	1673	27	חרוב מצוי	Ceratonia siliqua	זרע	seed	כליליים	Caesalpiniaceae			1	1	2
SVT-146	Shivta	Tepper, Bar-Oz and Gini	Daniel Fuks	2016-2020	K	165	1673	28	אמיך קוצני	Emex spinosa	פרי	fruit	ארכוביתיים	Polygonaceae			2	2	2
SVT-146	Shivta	Tepper, Bar-Oz and Gini	Daniel Fuks	2016-2020	K	165	1673	29	חפורית מוזרה	Phalaris paradoxa	יחידות הפצה	dispersal unit	דגניים	Gramineae			1	1	2		צולם
SVT-146	Shivta	Tepper, Bar-Oz and Gini	Daniel Fuks	2016-2020	K	165	1673	30	זנב-עקרב שיכני	Scorpiurus muricatus	זרע	seed	פרפרניים	Fabaceae			1	1	2
SVT-146	Shivta	Tepper, Bar-Oz and Gini	Daniel Fuks	2016-2020	K	165	1673	31	עדשה תרבותית	Lens culinaris	עוקץ	pedicel	פרפרניים	Fabaceae			1	1	2
SVT-146	Shivta	Tepper, Bar-Oz and Gini	Daniel Fuks	2016-2020	K	165	1673	32	בלתי		זרדים		דגניים	Gramineae					2		לא נספר
SVT-146	Shivta	Tepper, Bar-Oz and Gini	Daniel Fuks	2016-2020	K	165	1673	33	חיטה/שעורה	Hordeum/Triticum	גרגיר בגלל	grain in dung	דגניים	Gramineae			1	1	2
SVT-146	Shivta	Tepper, Bar-Oz and Gini	Daniel Fuks	2016-2020	K	165	1673	34	שעורה בגלל		גרגיר בגלל	grain in dung	דגניים	Gramineae			1	1	2		צולם
SVT-146	Shivta	Tepper, Bar-Oz and Gini	Daniel Fuks	2016-2020	K	165	1673	35	חלמית בגלל	Malva sp.	פרודה בגלל	mericarp in dung	חלמתיים	Malvaceae			1	1	2
SVT-146	Shivta	Tepper, Bar-Oz and Gini	Daniel Fuks	2016-2020	K	165	1673	36	זרע בגלל	Calendula?	זרע בגלל	seed in dung					1	1	2
SVT-146	Shivta	Tepper, Bar-Oz and Gini	Daniel Fuks	2016-2020	K	165	1673	37	Salsoleae	Salsoleae	פרקי גבעול	stem segments	סלקיים	Chenopodiaceae			1	1	2
SVT-146	Shivta	Tepper, Bar-Oz and Gini	Daniel Fuks	2016-2020	K	165	1673	38	זית אירופאי	Olea europaea	גלעין	stone	זיתיים	Oleaceae			2	2	2		שברים ומתוכם אחד שהוא חצי
SVT-146	Shivta	Tepper, Bar-Oz and Gini	Daniel Fuks	2016-2020	K	165	1673	39	ליואל								1	1	2
SVT-146	Shivta	Tepper, Bar-Oz and Gini	Daniel Fuks	2016-2020	K	165	1673	40	גללים										2		שברים ו-3 גללים שלמים
SVT-146	Shivta	Tepper, Bar-Oz and Gini	Daniel Fuks	2016-2020	K	165	1673	41	בלתי-שונות										2
SVT-146	Shivta	Tepper, Bar-Oz and Gini	Daniel Fuks	2016-2020	K	165	1673	42	זון אשון/רב שנתי	Lolium rigidum/perenne	גרגיר עטוי	grain	דגניים	Gramineae			1	1	2
SVT-146	Shivta	Tepper, Bar-Oz and Gini	Daniel Fuks	2016-2020	K	165	1673	43	זרע בגלל		גרגיר בגלל	grain in dung	דגניים	Gramineae			1	1	2
SVT-146	Shivta	Tepper, Bar-Oz and Gini	Daniel Fuks	2016-2020	K	165	1673	44	בקיי				פרפרניים	Fabaceae			1	1	2
SVT-146	Shivta	Tepper, Bar-Oz and Gini	Daniel Fuks	2016-2020	K	165	1673	45	פרפרני קטן		זרע	seed	פרפרניים	Fabaceae			1	1	2
SVT-146	Shivta	Tepper, Bar-Oz and Gini	Daniel Fuks	2016-2020	K	165	1673	46	אמיך קוצני?		זרע	seed	ארכוביתיים	Polygonaceae			1	1	2
SVT-146	Shivta	Tepper, Bar-Oz and Gini	Daniel Fuks	2016-2020	K	165	1673	47	מורכבים- לחבר בהמשך		תפרחת	inflorescence	מורכבים	Asteraceae			1	1	2
SVT-146	Shivta	Tepper, Bar-Oz and Gini	Daniel Fuks	2016-2020	K	165	1673	48	עשנן??	Fumaria?							1	1	2
SVT-146	Shivta	Tepper, Bar-Oz and Gini	Daniel Fuks	2016-2020	K	165	1673	49	cf. רימון מצוי	cf. Punica granatum	שבר זרע	seed fragment	cf. רימוניים	cf. Lythraceae			1	1	2
SVT-146	Shivta	Tepper, Bar-Oz and Gini	Daniel Fuks	2016-2020	K	165	1673	50	ליואל								1	1	2
SVT-146	Shivta	Tepper, Bar-Oz and Gini	Daniel Fuks	2016-2020	K	165	1673	51	דגני				דגניים	Gramineae			5	5	2
SVT-146	Shivta	Tepper, Bar-Oz and Gini	Daniel Fuks	2016-2020	K	165	1673	52	בלתי להמשך								1	1	2
SVT-146	Shivta	Tepper, Bar-Oz and Gini	Daniel Fuks	2016-2020	K	165	1673	53	בלתי שונות								1	1	2
SVT-146	Shivta	Tepper, Bar-Oz and Gini	Daniel Fuks	2016-2020	K	165	1673	54	דגני		גרגיר	grain	דגניים	Gramineae			1	0.3	2
SVT-147	Shivta	Tepper, Bar-Oz and Gini	Daniel Fuks	2016-2020	K	168	1669	1	שעורה	Hordeum	גרגיר	grain	דגניים	Gramineae			75	75	2		חולק ל-2 מבחנות
SVT-147	Shivta	Tepper, Bar-Oz and Gini	Daniel Fuks	2016-2020	K	168	1669	2	חיטה	Triticum sp.	גרגיר	grain	דגניים	Gramineae			20	20	2
SVT-147	Shivta	Tepper, Bar-Oz and Gini	Daniel Fuks	2016-2020	K	168	1669	3	חיטה/שעורה	Hordeum/Triticum	גרגיר	grain	דגניים	Gramineae			25	25	2
SVT-147	Shivta	Tepper, Bar-Oz and Gini	Daniel Fuks	2016-2020	K	168	1669	4	שברי דגני		גרגיר	grain	דגניים	Gramineae					2		לא נספר
SVT-147	Shivta	Tepper, Bar-Oz and Gini	Daniel Fuks	2016-2020	K	168	1669	5	גפן	Vitis vinifera	חרצן	pip	גפניים	Vitaceae			2	2	2
SVT-147	Shivta	Tepper, Bar-Oz and Gini	Daniel Fuks	2016-2020	K	168	1669	6	שעורה? זון? דגני אחר?		גרגיר	grain	דגניים	Gramineae			3	3	2
SVT-147	Shivta	Tepper, Bar-Oz and Gini	Daniel Fuks	2016-2020	K	168	1669	7	בקיים	Vicieae	פסיג וזרע	seed and cotyledon	פרפרניים	Fabaceae			4	4	2		פסיג וזרע
SVT-147	Shivta	Tepper, Bar-Oz and Gini	Daniel Fuks	2016-2020	K	168	1669	8	זנב-עקרב שיכני	Scorpiurus muricatus	זרע	seed	פרפרניים	Fabaceae			1	1	2
SVT-147	Shivta	Tepper, Bar-Oz and Gini	Daniel Fuks	2016-2020	K	168	1669	9	שעורה שש-טורית	Hordeum vulgare hexastichum	פרק ציר שיבולת	rachis fragment	דגניים	Gramineae			1	1	2		2 פרקים
SVT-147	Shivta	Tepper, Bar-Oz and Gini	Daniel Fuks	2016-2020	K	168	1669	10	חיטה טטרפלוידית	Triticum turgidum s.l.	פרק ציר שיבולת	rachis fragment	דגניים	Gramineae			4	4	2		כולל 2 עם 4 פרקים ואחד עם 3
SVT-147	Shivta	Tepper, Bar-Oz and Gini	Daniel Fuks	2016-2020	K	168	1669	11	חיטה	Triticum sp.	פרק ראשון וצאוורון	first rachis &collar	דגניים	Gramineae			1	1	2
SVT-147	Shivta	Tepper, Bar-Oz and Gini	Daniel Fuks	2016-2020	K	168	1669	12	חיטה/שעורה	Hordeum/Triticum	פרקי גבעול	culm node	דגניים	Gramineae			59	59	2
SVT-147	Shivta	Tepper, Bar-Oz and Gini	Daniel Fuks	2016-2020	K	168	1669	13	חיטה/שעורה	Hordeum/Triticum	שורש דגן	culm root	דגניים	Gramineae			5	5	2
SVT-147	Shivta	Tepper, Bar-Oz and Gini	Daniel Fuks	2016-2020	K	168	1669	14	זית אירופאי	Olea europaea	גלעין	stone	זיתיים	Oleaceae			1	1	2		שבר גלעין
SVT-147	Shivta	Tepper, Bar-Oz and Gini	Daniel Fuks	2016-2020	K	168	1669	15	תמר מצוי	Phoenix dactylifera	שברי גלעין	stone fragment	דקליים	Palmae			3	3	2
SVT-147	Shivta	Tepper, Bar-Oz and Gini	Daniel Fuks	2016-2020	K	168	1669	16	אמיך קוצני	Emex spinosa	פרי	fruit	ארכוביתיים	Polygonaceae			1	1	2
SVT-147	Shivta	Tepper, Bar-Oz and Gini	Daniel Fuks	2016-2020	K	168	1669	17	ליואל								1	1	2
SVT-147	Shivta	Tepper, Bar-Oz and Gini	Daniel Fuks	2016-2020	K	168	1669	18	גלל								6	6	2
SVT-147	Shivta	Tepper, Bar-Oz and Gini	Daniel Fuks	2016-2020	K	168	1669	19	בלתי										2
SVT-147	Shivta	Tepper, Bar-Oz and Gini	Daniel Fuks	2016-2020	K	168	1669	20	בלתי-שונות										2
SVT-148	Shivta	Tepper, Bar-Oz and Gini	Daniel Fuks	2016-2020	K	169	1677	1	שעורה	Hordeum	גרגיר	grain	דגניים	Gramineae			55	55	2
SVT-148	Shivta	Tepper, Bar-Oz and Gini	Daniel Fuks	2016-2020	K	169	1677	2	חיטה	Triticum sp.	גרגיר	grain	דגניים	Gramineae			29	29	2
SVT-148	Shivta	Tepper, Bar-Oz and Gini	Daniel Fuks	2016-2020	K	169	1677	3	חיטה/שעורה	Hordeum/Triticum	גרגיר	grain	דגניים	Gramineae			11	11	2
SVT-148	Shivta	Tepper, Bar-Oz and Gini	Daniel Fuks	2016-2020	K	169	1677	4	שברי דגן		גרגיר	grain	דגניים	Gramineae					2		לא נספר
SVT-148	Shivta	Tepper, Bar-Oz and Gini	Daniel Fuks	2016-2020	K	169	1677	5	גפן	Vitis vinifera	חרצן	pip	גפניים	Vitaceae			23	23	2
SVT-148	Shivta	Tepper, Bar-Oz and Gini	Daniel Fuks	2016-2020	K	169	1677	6	גפן	Vitis vinifera	עוקץ	pedicel	גפניים	Vitaceae			2	2	2
SVT-148	Shivta	Tepper, Bar-Oz and Gini	Daniel Fuks	2016-2020	K	169	1677	7	גפן	Vitis vinifera	זג	exocarp	גפניים	Vitaceae					2		לא נספר
SVT-148	Shivta	Tepper, Bar-Oz and Gini	Daniel Fuks	2016-2020	K	169	1677	8	שעורה שש-טורית	Hordeum vulgare hexastichum	פרק ציר שיבולת	rachis fragment	דגניים	Gramineae			4	4	2
SVT-148	Shivta	Tepper, Bar-Oz and Gini	Daniel Fuks	2016-2020	K	169	1677	9	שעורה שש-טורית	Hordeum vulgare hexastichum	פרק ראשון וצאוורון	first rachis &collar	דגניים	Gramineae			1	1	2		4 פרקים
SVT-148	Shivta	Tepper, Bar-Oz and Gini	Daniel Fuks	2016-2020	K	169	1677	10	שעורה?	Hordeum?	צווארון	collar	דגניים	Gramineae			1	1	2
SVT-148	Shivta	Tepper, Bar-Oz and Gini	Daniel Fuks	2016-2020	K	169	1677	11	חיטה טטרפלוידית	Triticum turgidum s.l.	פרק ציר שיבולת	rachis fragment	דגניים	Gramineae			8	8	2		3 פרקים
SVT-148	Shivta	Tepper, Bar-Oz and Gini	Daniel Fuks	2016-2020	K	169	1677	12	חיטה טטרפלוידית	Triticum turgidum s.l.	פרק ראשון וצאוורון	first rachis &collar	דגניים	Gramineae			1	1	2
SVT-148	Shivta	Tepper, Bar-Oz and Gini	Daniel Fuks	2016-2020	K	169	1677	13	חיטה	Triticum sp.	פרק ציר שיבולת	rachis fragment	דגניים	Gramineae			1	1	2
SVT-148	Shivta	Tepper, Bar-Oz and Gini	Daniel Fuks	2016-2020	K	169	1677	14	חיטה	Triticum sp.	צווארון	collar	דגניים	Gramineae			1	1	2
SVT-148	Shivta	Tepper, Bar-Oz and Gini	Daniel Fuks	2016-2020	K	169	1677	15	חיטה/שעורה	Hordeum/Triticum	צווארון	collar	דגניים	Gramineae			1	1	2
SVT-148	Shivta	Tepper, Bar-Oz and Gini	Daniel Fuks	2016-2020	K	169	1677	16	חיטה/שעורה	Hordeum/Triticum	פרקי גבעול	culm node	דגניים	Gramineae			39	39	2
SVT-148	Shivta	Tepper, Bar-Oz and Gini	Daniel Fuks	2016-2020	K	169	1677	17	חיטה/שעורה	Hordeum/Triticum	שורש דגן	culm root	דגניים	Gramineae			3	3	2
SVT-148	Shivta	Tepper, Bar-Oz and Gini	Daniel Fuks	2016-2020	K	169	1677	18	בקיית הכרשינה	cf. Vicia ervilia	פסיגים וזרע	cotyledon &seed	פרפרניים	Fabaceae			23	23	2		פסיג נספר כחצי
SVT-148	Shivta	Tepper, Bar-Oz and Gini	Daniel Fuks	2016-2020	K	169	1677	19	עדשה	Lens culinaris	זרע	seed	פרפרניים	Fabaceae			1	1	2
SVT-148	Shivta	Tepper, Bar-Oz and Gini	Daniel Fuks	2016-2020	K	169	1677	20	זית אירופאי	Olea europaea	גלעין	stone	זיתיים	Oleaceae			1	1	2		שברי גלעין
SVT-148	Shivta	Tepper, Bar-Oz and Gini	Daniel Fuks	2016-2020	K	169	1677	21	תמר מצוי	Phoenix dactylifera	שברי גלעין	stone fragment	דקליים	Palmae			1	1	2		שברי גלעין. חולק ל-2 מבחנות
SVT-148	Shivta	Tepper, Bar-Oz and Gini	Daniel Fuks	2016-2020	K	169	1677	22	מתנן שעיר	Thymelaea hirsuta	ענף עם עלים	stem with leaves	מתנניים	Thymelaeaceae			1	1	2
SVT-148	Shivta	Tepper, Bar-Oz and Gini	Daniel Fuks	2016-2020	K	169	1677	23	אמיך קוצני	Emex spinosa	פרי	fruit	ארכוביתיים	Polygonaceae			6	6	2
SVT-148	Shivta	Tepper, Bar-Oz and Gini	Daniel Fuks	2016-2020	K	169	1677	24	ציפורני החתול	Calendula sp.	זרעון	achene	מורכבים	Asteraceae			3	3	2
SVT-148	Shivta	Tepper, Bar-Oz and Gini	Daniel Fuks	2016-2020	K	169	1677	25	מורכבים ליואל		תפרחת	inflorescence	מורכבים	Asteraceae			5	5	2
SVT-148	Shivta	Tepper, Bar-Oz and Gini	Daniel Fuks	2016-2020	K	169	1677	26	מורכבים? קרקפת? ליואל		קרקפת?	head?	מורכבים?	Asteraceae?			1	1	2
SVT-148	Shivta	Tepper, Bar-Oz and Gini	Daniel Fuks	2016-2020	K	169	1677	27	ליואל								1	1	2
SVT-148	Shivta	Tepper, Bar-Oz and Gini	Daniel Fuks	2016-2020	K	169	1677	28	ליואל								1	1	2
SVT-148	Shivta	Tepper, Bar-Oz and Gini	Daniel Fuks	2016-2020	K	169	1677	29	ליואל								1	1	2
SVT-148	Shivta	Tepper, Bar-Oz and Gini	Daniel Fuks	2016-2020	K	169	1677	30	ליואל								1	1	2
SVT-148	Shivta	Tepper, Bar-Oz and Gini	Daniel Fuks	2016-2020	K	169	1677	31	זרע בגלל								1	1	2
SVT-148	Shivta	Tepper, Bar-Oz and Gini	Daniel Fuks	2016-2020	K	169	1677	32	גלל שלם								1	1	2		גלל שלם (וגדול) ושברים
SVT-148	Shivta	Tepper, Bar-Oz and Gini	Daniel Fuks	2016-2020	K	169	1677	33	בלתי לחבר בהמשך										2
SVT-148	Shivta	Tepper, Bar-Oz and Gini	Daniel Fuks	2016-2020	K	169	1677	34	בלתי-שונות										2
SVT-149	Shivta	Tepper, Bar-Oz and Gini	Daniel Fuks	2016-2020	K	169	1702	1	שעורה	Hordeum	גרגיר	grain	דגניים	Gramineae			21	21	2
SVT-149	Shivta	Tepper, Bar-Oz and Gini	Daniel Fuks	2016-2020	K	169	1702	2	חיטה	Triticum sp.	גרגיר	grain	דגניים	Gramineae			21	21	2
SVT-149	Shivta	Tepper, Bar-Oz and Gini	Daniel Fuks	2016-2020	K	169	1702	3	חיטה/שעורה	Hordeum/Triticum	גרגיר	grain	דגניים	Gramineae			6	6	2
SVT-149	Shivta	Tepper, Bar-Oz and Gini	Daniel Fuks	2016-2020	K	169	1702	4	שברי דגן		גרגיר	grain	דגניים	Gramineae					2
SVT-149	Shivta	Tepper, Bar-Oz and Gini	Daniel Fuks	2016-2020	K	169	1702	5	גפן	Vitis vinifera	חרצן	pip	גפניים	Vitaceae			11	11	2
SVT-149	Shivta	Tepper, Bar-Oz and Gini	Daniel Fuks	2016-2020	K	169	1702	6	גפן	Vitis vinifera	עוקץ	pedicel	גפניים	Vitaceae			1	1	2
SVT-149	Shivta	Tepper, Bar-Oz and Gini	Daniel Fuks	2016-2020	K	169	1702	7	גפן	Vitis vinifera	זג	exocarp	גפניים	Vitaceae					2
SVT-149	Shivta	Tepper, Bar-Oz and Gini	Daniel Fuks	2016-2020	K	169	1702	8	שעורה? או ש"ש?				דגניים	Gramineae			1	1	2
SVT-149	Shivta	Tepper, Bar-Oz and Gini	Daniel Fuks	2016-2020	K	169	1702	9	שעורה שש-טורית	Hordeum vulgare hexastichum	פרק ציר שיבולת	rachis fragment	דגניים	Gramineae			3	3	2
SVT-149	Shivta	Tepper, Bar-Oz and Gini	Daniel Fuks	2016-2020	K	169	1702	10	חיטה טטרפלוידית	Triticum turgidum s.l.	פרק ציר שיבולת	rachis fragment	דגניים	Gramineae			4	4	2
SVT-149	Shivta	Tepper, Bar-Oz and Gini	Daniel Fuks	2016-2020	K	169	1702	11	חיטה טטרפלוידית	Triticum turgidum s.l.	פרק ראשון וצאוורון	first rachis &collar	דגניים	Gramineae			2	2	2		ארבע פרקים
SVT-149	Shivta	Tepper, Bar-Oz and Gini	Daniel Fuks	2016-2020	K	169	1702	12	חיטה	Triticum sp.	פרק ציר שיבולת	rachis fragment	דגניים	Gramineae			1	1	2
SVT-149	Shivta	Tepper, Bar-Oz and Gini	Daniel Fuks	2016-2020	K	169	1702	13	חיטה/שעורה	Hordeum/Triticum	פרקי גבעול	culm node	דגניים	Gramineae			34	34	2
SVT-149	Shivta	Tepper, Bar-Oz and Gini	Daniel Fuks	2016-2020	K	169	1702	14	חיטה/שעורה	Hordeum/Triticum	שורש דגן?	culm root?	דגניים	Gramineae			5	5	2
SVT-149	Shivta	Tepper, Bar-Oz and Gini	Daniel Fuks	2016-2020	K	169	1702	15	חיטה טטרפלוידית עם גלל	Triticum turgidum s.l.			דגניים	Gramineae			1	1	2
SVT-149	Shivta	Tepper, Bar-Oz and Gini	Daniel Fuks	2016-2020	K	169	1702	16	בקיית הכרשינה	Vicia ervilia	פסיגים וזרע	cotyledon &seed	פרפרניים	Fabaceae			4	4	2
SVT-149	Shivta	Tepper, Bar-Oz and Gini	Daniel Fuks	2016-2020	K	169	1702	17	בקיים	Vicieae	פסיג וזרע	seed and cotyledon	פרפרניים	Fabaceae			7	7	2
SVT-149	Shivta	Tepper, Bar-Oz and Gini	Daniel Fuks	2016-2020	K	169	1702	18	זנב-עקרב שיכני	Scorpiurus muricatus	זרע	seed	פרפרניים	Fabaceae			3	3	2
SVT-149	Shivta	Tepper, Bar-Oz and Gini	Daniel Fuks	2016-2020	K	169	1702	19	עדשה	Lens	זרע	seed	פרפרניים	Fabaceae			1	1	2
SVT-149	Shivta	Tepper, Bar-Oz and Gini	Daniel Fuks	2016-2020	K	169	1702	20	בקיים	Vicia/Lathyrus	זרע	seed	פרפרניים	Fabaceae			1	1	2		אולי פול, אולי טופח
SVT-149	Shivta	Tepper, Bar-Oz and Gini	Daniel Fuks	2016-2020	K	169	1702	21	בקיים לחבר בהמשך	Vicieae	זרע ופסיג	seed and cotyledon	פרפרניים	Fabaceae			2	2	2
SVT-149	Shivta	Tepper, Bar-Oz and Gini	Daniel Fuks	2016-2020	K	169	1702	22	זית אירופאי	Olea europaea	גלעין	stone	זיתיים	Oleaceae			1	1	2		חצי גלעין
SVT-149	Shivta	Tepper, Bar-Oz and Gini	Daniel Fuks	2016-2020	K	169	1702	23	תמר מצוי	Phoenix dactylifera	גלעין	stone	דקליים	Palmae			2	2	2		שני גלעינים שלמים. נמצאים ב-2 מבחנות
SVT-149	Shivta	Tepper, Bar-Oz and Gini	Daniel Fuks	2016-2020	K	169	1702	24	רימון מצוי	Punica granatum	קליפת הפרי	rind fragment	כפריים	Lythraceae			1	1	2		שבר קליפה
SVT-149	Shivta	Tepper, Bar-Oz and Gini	Daniel Fuks	2016-2020	K	169	1702	25	זרע שעבר בגלל?								1	1	2
SVT-149	Shivta	Tepper, Bar-Oz and Gini	Daniel Fuks	2016-2020	K	169	1702	26	זון? גרגיר עטוי	Lolium?	גרגיר	grain	דגניים	Gramineae			1	1	2
SVT-149	Shivta	Tepper, Bar-Oz and Gini	Daniel Fuks	2016-2020	K	169	1702	27	דבקה?	Galium?	זרע	seed	פואתיים	Rubiaceae			1	1	2
SVT-149	Shivta	Tepper, Bar-Oz and Gini	Daniel Fuks	2016-2020	K	169	1702	28	אמיך קוצני	Emex spinosa	פרי	fruit	ארכוביתיים	Polygonaceae			1	1	2
SVT-149	Shivta	Tepper, Bar-Oz and Gini	Daniel Fuks	2016-2020	K	169	1702	29	ליואל								1	1	2
SVT-149	Shivta	Tepper, Bar-Oz and Gini	Daniel Fuks	2016-2020	K	169	1702	30	גלל- שברים										2		גלל- שברים קטנים ודקים
SVT-149	Shivta	Tepper, Bar-Oz and Gini	Daniel Fuks	2016-2020	K	169	1702	31	זרדים										2		לא נספר
SVT-149	Shivta	Tepper, Bar-Oz and Gini	Daniel Fuks	2016-2020	K	169	1702	32	בלתי								1	1	2
SVT-149	Shivta	Tepper, Bar-Oz and Gini	Daniel Fuks	2016-2020	K	169	1702	33	בלתי-שונות										2		לא נספר
SVT-150	Shivta	Tepper, Bar-Oz and Gini	Daniel Fuks	2016-2020	K	169	1704	1	שעורה	Hordeum vulgare	גרגיר	grain	דגניים	Gramineae			43	43	2
SVT-150	Shivta	Tepper, Bar-Oz and Gini	Daniel Fuks	2016-2020	K	169	1704	2	חיטה	Triticum sp.	גרגיר	grain	דגניים	Gramineae			31	31	2
SVT-150	Shivta	Tepper, Bar-Oz and Gini	Daniel Fuks	2016-2020	K	169	1704	3	חיטה/שעורה	Hordeum/Triticum	גרגיר	grain	דגניים	Gramineae			11	11	2
SVT-150	Shivta	Tepper, Bar-Oz and Gini	Daniel Fuks	2016-2020	K	169	1704	4	שברי דגן		גרגיר	grain	דגניים	Gramineae					2		לא נספר
SVT-150	Shivta	Tepper, Bar-Oz and Gini	Daniel Fuks	2016-2020	K	169	1704	5	גפן	Vitis vinifera	חרצן	pip	גפניים	Vitaceae			11	11	2
SVT-150	Shivta	Tepper, Bar-Oz and Gini	Daniel Fuks	2016-2020	K	169	1704	6	גפן	Vitis vinifera	עוקץ	pedicel	גפניים	Vitaceae			1	1	2
SVT-150	Shivta	Tepper, Bar-Oz and Gini	Daniel Fuks	2016-2020	K	169	1704	7	גפן	Vitis vinifera	זג	exocarp	גפניים	Vitaceae					2		לא נספר
SVT-150	Shivta	Tepper, Bar-Oz and Gini	Daniel Fuks	2016-2020	K	169	1704	8	גפן	Vitis vinifera	צימוק	pericarp	גפניים	Vitaceae			1	1	2
SVT-150	Shivta	Tepper, Bar-Oz and Gini	Daniel Fuks	2016-2020	K	169	1704	9	שעורה שש-טורית	Hordeum vulgare hexastichum	פרק ציר שיבולת	rachis fragment	דגניים	Gramineae			2	2	2
SVT-150	Shivta	Tepper, Bar-Oz and Gini	Daniel Fuks	2016-2020	K	169	1704	10	חיטה טטרפלוידית	Triticum turgidum s.l.	פרק ציר שיבולת	rachis fragment	דגניים	Gramineae			3	3	2
SVT-150	Shivta	Tepper, Bar-Oz and Gini	Daniel Fuks	2016-2020	K	169	1704	11	חיטה/שעורה	Hordeum/Triticum	פרק ציר שיבולת	rachis fragment	דגניים	Gramineae			1	1	2
SVT-150	Shivta	Tepper, Bar-Oz and Gini	Daniel Fuks	2016-2020	K	169	1704	12	חיטה/שעורה cf.	cf. Hordeum/Triticum	פרקי גבעול	culm node	דגניים	Gramineae			37	37	2
SVT-150	Shivta	Tepper, Bar-Oz and Gini	Daniel Fuks	2016-2020	K	169	1704	13	חיטה/שעורה cf.	cf. Hordeum/Triticum	שורש דגן	culm root	דגניים	Gramineae			3	3	2
SVT-150	Shivta	Tepper, Bar-Oz and Gini	Daniel Fuks	2016-2020	K	169	1704	14	חיטה? בן חיטה?	Triticum/Aegilops?	גרגיר	grain	דגניים	Gramineae			1	1	2
SVT-150	Shivta	Tepper, Bar-Oz and Gini	Daniel Fuks	2016-2020	K	169	1704	15	שיבולת שועל	Avena sp.	שיבולית	floret	דגניים	Gramineae			2	2	2
SVT-150	Shivta	Tepper, Bar-Oz and Gini	Daniel Fuks	2016-2020	K	169	1704	16	בקיית הכרשינה	Vicia ervilia	זרע	seed	פרפרניים	Fabaceae			14	14	2		7 פסיגים שבסבירות גבוהה שייכים לכרשינה = 4 זרעים
SVT-150	Shivta	Tepper, Bar-Oz and Gini	Daniel Fuks	2016-2020	K	169	1704	17	בקיים	Vicieae	זרע	seed	פרפרניים	Fabaceae			3	3	2		כרשינה?
SVT-150	Shivta	Tepper, Bar-Oz and Gini	Daniel Fuks	2016-2020	K	169	1704	18	בקיים	Vicieae	פסיג	cotyledon	פרפרניים	Fabaceae			12	12	2
SVT-150	Shivta	Tepper, Bar-Oz and Gini	Daniel Fuks	2016-2020	K	169	1704	19	EMPTY										2
SVT-150	Shivta	Tepper, Bar-Oz and Gini	Daniel Fuks	2016-2020	K	169	1704	20	עדשה תרבותית	Lens culinaris	זרע	seed	פרפרניים	Fabaceae			1	1	2
SVT-150	Shivta	Tepper, Bar-Oz and Gini	Daniel Fuks	2016-2020	K	169	1704	21	אספספת	Medicago sp.	תרמיל	pod	פרפרניים	Fabaceae			2	2	2
SVT-150	Shivta	Tepper, Bar-Oz and Gini	Daniel Fuks	2016-2020	K	169	1704	22	זית אירופאי	Olea europaea	שבר גלעין	stone fragment	זיתיים	Oleaceae			1	1	2		שבר גלעין
SVT-150	Shivta	Tepper, Bar-Oz and Gini	Daniel Fuks	2016-2020	K	169	1704	23	תמר מצוי	Phoenix dactylifera	שבר גלעין	stone fragment	דקליים	Palmae			2	2	2		שבר גלעין
SVT-150	Shivta	Tepper, Bar-Oz and Gini	Daniel Fuks	2016-2020	K	169	1704	24	רימון מצוי	Punica granatum	קליפת הפרי	rind fragment	כפריים	Lythraceae			1	1	2		שבר קליפה
SVT-150	Shivta	Tepper, Bar-Oz and Gini	Daniel Fuks	2016-2020	K	169	1704	25	אמיך קוצני	Emex spinosa	פרי	fruit	ארכוביתיים	Polygonaceae			1	1	2
SVT-150	Shivta	Tepper, Bar-Oz and Gini	Daniel Fuks	2016-2020	K	169	1704	26	Salsoleae	Salsoleae	פרקי גבעול	stem segments	סלקיים	Chenopodiaceae			1	1	2
SVT-150	Shivta	Tepper, Bar-Oz and Gini	Daniel Fuks	2016-2020	K	169	1704	27	גללים- שברים										2		שברים. לא נספר. חולק ל-2 מבחנות
SVT-150	Shivta	Tepper, Bar-Oz and Gini	Daniel Fuks	2016-2020	K	169	1704	28	גלל+זרע								1	1	2
SVT-150	Shivta	Tepper, Bar-Oz and Gini	Daniel Fuks	2016-2020	K	169	1704	29	בלתי- ליואל								1	1	2
SVT-150	Shivta	Tepper, Bar-Oz and Gini	Daniel Fuks	2016-2020	K	169	1704	30	בלתי-שונות										2		לא נספר
SVT-151	Shivta	Tepper, Bar-Oz and Gini	Daniel Fuks	2016-2020	K	170	1681	1	שעורה	Hordeum vulgare	גרגיר	grain	דגניים	Gramineae			54	54	2		חולק ל-2 מבחנות
SVT-151	Shivta	Tepper, Bar-Oz and Gini	Daniel Fuks	2016-2020	K	170	1681	2	חיטה	Triticum sp.	גרגיר	grain	דגניים	Gramineae			15	15	2
SVT-151	Shivta	Tepper, Bar-Oz and Gini	Daniel Fuks	2016-2020	K	170	1681	3	חיטה/שעורה	Hordeum/Triticum	גרגיר	grain	דגניים	Gramineae			10	10	2
SVT-151	Shivta	Tepper, Bar-Oz and Gini	Daniel Fuks	2016-2020	K	170	1681	4	שברי דגן		גרגיר	grain	דגניים	Gramineae					2		לא נספר
SVT-151	Shivta	Tepper, Bar-Oz and Gini	Daniel Fuks	2016-2020	K	170	1681	5	גפן?	Vitis vinifera?	עוקץ?	pedicel?	?גפניים	Vitaceae?			1	1	2
SVT-151	Shivta	Tepper, Bar-Oz and Gini	Daniel Fuks	2016-2020	K	170	1681	6	גפן?	Vitis vinifera?	?זג	exocarp?	?גפניים	Vitaceae?			1	1	2
SVT-151	Shivta	Tepper, Bar-Oz and Gini	Daniel Fuks	2016-2020	K	170	1681	7	שעורה שש-טורית	Hordeum vulgare hexastichum	פרק ציר שיבולת	rachis fragment	דגניים	Gramineae			5	5	2
SVT-151	Shivta	Tepper, Bar-Oz and Gini	Daniel Fuks	2016-2020	K	170	1681	8	שעורה	Hordeum sp.	פרק ראשון?	first rachis?	דגניים	Gramineae			2	2	2
SVT-151	Shivta	Tepper, Bar-Oz and Gini	Daniel Fuks	2016-2020	K	170	1681	9	חיטה טטרפלוידית	Triticum turgidum s.l.	פרק ציר שיבולת	rachis fragment	דגניים	Gramineae			7	7	2		כולל אחד עם 6, אחד עם 4, אחד עם 6, שלוש עם 2
SVT-151	Shivta	Tepper, Bar-Oz and Gini	Daniel Fuks	2016-2020	K	170	1681	10	חיטה	Triticum sp.	צאוורון	collar	דגניים	Gramineae			1	1	2
SVT-151	Shivta	Tepper, Bar-Oz and Gini	Daniel Fuks	2016-2020	K	170	1681	11	חיטה?	Triticum?	גרגיר	grain	דגניים	Gramineae			1	1	2
SVT-151	Shivta	Tepper, Bar-Oz and Gini	Daniel Fuks	2016-2020	K	170	1681	12	זון?	Lolium?	גרגיר	grain	דגניים	Gramineae			1	1	2
SVT-151	Shivta	Tepper, Bar-Oz and Gini	Daniel Fuks	2016-2020	K	170	1681	13	חיטה/שעורה cf.	cf. Hordeum/Triticum	פרקי גבעול	culm node	דגניים	Gramineae			57	57	2		חולק ל-2 מבחנות
SVT-151	Shivta	Tepper, Bar-Oz and Gini	Daniel Fuks	2016-2020	K	170	1681	14	חיטה/שעורה cf.	cf. Hordeum/Triticum	שורש דגן	culm root	דגניים	Gramineae			6	6	2
SVT-151	Shivta	Tepper, Bar-Oz and Gini	Daniel Fuks	2016-2020	K	170	1681	15	בקיית הכרשינה?	Vicia ervilia?	פסיג	cotyledon	פרפרניים	Fabaceae			1	1	2
SVT-151	Shivta	Tepper, Bar-Oz and Gini	Daniel Fuks	2016-2020	K	170	1681	16	זנב-עקרב שיכני	Scorpiurus muricatus	זרע	seed	פרפרניים	Fabaceae			2	2	2
SVT-151	Shivta	Tepper, Bar-Oz and Gini	Daniel Fuks	2016-2020	K	170	1681	17	פרפרני ליואל				פרפרניים	Fabaceae			1	1	2
SVT-151	Shivta	Tepper, Bar-Oz and Gini	Daniel Fuks	2016-2020	K	170	1681	18	פרפרני? ליואל				?פרפרניים	Fabaceae?			1	1	2
SVT-151	Shivta	Tepper, Bar-Oz and Gini	Daniel Fuks	2016-2020	K	170	1681	19	ליואל								1	1	2
SVT-151	Shivta	Tepper, Bar-Oz and Gini	Daniel Fuks	2016-2020	K	170	1681	20	ליואל ורדי?								1	1	2
SVT-151	Shivta	Tepper, Bar-Oz and Gini	Daniel Fuks	2016-2020	K	170	1681	21	מורכבים		תפרחת	inflorescence	מורכבים	Asteraceae			1	1	2
SVT-151	Shivta	Tepper, Bar-Oz and Gini	Daniel Fuks	2016-2020	K	170	1681	22	אמיך קוצני	Emex spinosa	פרי	fruit	ארכוביתיים	Polygonaceae			3	3	2
SVT-151	Shivta	Tepper, Bar-Oz and Gini	Daniel Fuks	2016-2020	K	170	1681	23	תמר מצוי?								13	13	2		שברים קטנים
SVT-151	Shivta	Tepper, Bar-Oz and Gini	Daniel Fuks	2016-2020	K	170	1681	24	Salsoleae	Salsoleae	פרקי גבעול	stem segments	סלקיים	Chenopodiaceae			1	1	2		לא נספר. שברים קטנים
SVT-151	Shivta	Tepper, Bar-Oz and Gini	Daniel Fuks	2016-2020	K	170	1681	25	גללים- שברים										2
SVT-151	Shivta	Tepper, Bar-Oz and Gini	Daniel Fuks	2016-2020	K	170	1681	26	זרדים								13	13	2		לא נספר
SVT-151	Shivta	Tepper, Bar-Oz and Gini	Daniel Fuks	2016-2020	K	170	1681	27	בלתי-שונות										2
SVT-152	Shivta	Tepper, Bar-Oz and Gini	Daniel Fuks	2016-2020	K	172	1687	1	שעורה	Hordeum vulgare	גרגיר	grain	דגניים	Gramineae			47	47	2
SVT-152	Shivta	Tepper, Bar-Oz and Gini	Daniel Fuks	2016-2020	K	172	1687	2	חיטה	Triticum sp.	גרגיר	grain	דגניים	Gramineae			88	88	2		זרע אחד דבוק לכרשינה ונמצא במבחנה 17
SVT-152	Shivta	Tepper, Bar-Oz and Gini	Daniel Fuks	2016-2020	K	172	1687	3	חיטה/שעורה	Hordeum/Triticum	גרגיר	grain	דגניים	Gramineae			17	17	2
SVT-152	Shivta	Tepper, Bar-Oz and Gini	Daniel Fuks	2016-2020	K	172	1687	4	שברי דגן		גרגיר	grain	דגניים	Gramineae					2		לא נספר
SVT-152	Shivta	Tepper, Bar-Oz and Gini	Daniel Fuks	2016-2020	K	172	1687	5	שעורה טיפוס 2		גרגיר	grain	דגניים	Gramineae			3	3	2
SVT-152	Shivta	Tepper, Bar-Oz and Gini	Daniel Fuks	2016-2020	K	172	1687	6	זון משכר?	Lolium temulentum?	גרגיר	grain	דגניים	Gramineae			1	1	2
SVT-152	Shivta	Tepper, Bar-Oz and Gini	Daniel Fuks	2016-2020	K	172	1687	7	גפן	Vitis vinifera	חרצן	pip	גפניים	Vitaceae			60	60	2
SVT-152	Shivta	Tepper, Bar-Oz and Gini	Daniel Fuks	2016-2020	K	172	1687	8	גפן	Vitis vinifera	צימוק	pericarp	גפניים	Vitaceae			3	3	2		כולל 4 חרצנים שנספרו לעיל
SVT-152	Shivta	Tepper, Bar-Oz and Gini	Daniel Fuks	2016-2020	K	172	1687	9	גפן	Vitis vinifera	עוקץ	pedicel	גפניים	Vitaceae			4	4	2		לא נספר
SVT-152	Shivta	Tepper, Bar-Oz and Gini	Daniel Fuks	2016-2020	K	172	1687	10	גפן	Vitis vinifera	זג	exocarp	גפניים	Vitaceae					2		צימוק עם חרצן בפנים
SVT-152	Shivta	Tepper, Bar-Oz and Gini	Daniel Fuks	2016-2020	K	172	1687	11	חיטה טטרפלוידית	Triticum turgidum s.l.	פרק ציר שיבולת	rachis fragment	דגניים	Gramineae			10	10	2
SVT-152	Shivta	Tepper, Bar-Oz and Gini	Daniel Fuks	2016-2020	K	172	1687	12	חיטה טטרפלוידית	Triticum turgidum s.l.	פרק ראשון וצאוורון	first rachis &collar	דגניים	Gramineae			1	1	2
SVT-152	Shivta	Tepper, Bar-Oz and Gini	Daniel Fuks	2016-2020	K	172	1687	13	חיטה טטרפלוידית מגלל	Triticum turgidum s.l.	פרק ציר שיבולת	rachis fragment	דגניים	Gramineae			1	1	2
SVT-152	Shivta	Tepper, Bar-Oz and Gini	Daniel Fuks	2016-2020	K	172	1687	14	דגני		פרק ציר שיבולת	rachis fragment	דגניים	Gramineae			1	1	2
SVT-152	Shivta	Tepper, Bar-Oz and Gini	Daniel Fuks	2016-2020	K	172	1687	15	חיטה/שעורה cf.	cf. Hordeum/Triticum	פרקי גבעול	culm node	דגניים	Gramineae			67	67	2		חולק ל-2 מבחנות
SVT-152	Shivta	Tepper, Bar-Oz and Gini	Daniel Fuks	2016-2020	K	172	1687	16	חיטה/שעורה cf.	cf. Hordeum/Triticum	שורש דגן	culm root	דגניים	Gramineae			7	7	2
SVT-152	Shivta	Tepper, Bar-Oz and Gini	Daniel Fuks	2016-2020	K	172	1687	17	בקיית הכרשינה	Vicia ervilia	זרע	seed	פרפרניים	Fabaceae			14	14	2		זרע אחד דבוק לחיטה
SVT-152	Shivta	Tepper, Bar-Oz and Gini	Daniel Fuks	2016-2020	K	172	1687	18	בקיית הכרשינה	Vicia ervilia	פסיג	cotyledon	פרפרניים	Fabaceae			7	7	2
SVT-152	Shivta	Tepper, Bar-Oz and Gini	Daniel Fuks	2016-2020	K	172	1687	19	עדשה תרבותית	Lens culinaris	זרע ופסיג	seed and cotyledon	פרפרניים	Fabaceae			3	3	2		1 זרע, 2 פסיג
SVT-152	Shivta	Tepper, Bar-Oz and Gini	Daniel Fuks	2016-2020	K	172	1687	20	בקיים	Vicieae	זרע	seed	פרפרניים	Fabaceae			6	6	2
SVT-152	Shivta	Tepper, Bar-Oz and Gini	Daniel Fuks	2016-2020	K	172	1687	21	בקיים	Vicieae	פסיג	cotyledon	פרפרניים	Fabaceae			9	9	2		קליפה מגובששת
SVT-152	Shivta	Tepper, Bar-Oz and Gini	Daniel Fuks	2016-2020	K	172	1687	22	בקיים להגדרה	Vicieae	זרע	seed	פרפרניים	Fabaceae			1	1	2		3 זרעים, 1 פסיג
SVT-152	Shivta	Tepper, Bar-Oz and Gini	Daniel Fuks	2016-2020	K	172	1687	23	בקיים להגדרה	Vicieae	זרע ופסיג	seed and cotyledon	פרפרניים	Fabaceae			4	4	2
SVT-152	Shivta	Tepper, Bar-Oz and Gini	Daniel Fuks	2016-2020	K	172	1687	24	זית אירופאי	Olea europaea	שבר גלעין	stone fragment	זיתיים	Oleaceae			2	2	2		אחד שלם, ו-2 חצאים
SVT-152	Shivta	Tepper, Bar-Oz and Gini	Daniel Fuks	2016-2020	K	172	1687	25	תמר מצוי	Phoenix dactylifera	שבר גלעין	stone fragment	דקליים	Palmae			2	2	2		4 חצאים
SVT-152	Shivta	Tepper, Bar-Oz and Gini	Daniel Fuks	2016-2020	K	172	1687	26	מורכבים	Asteraceae	תפרחת	inflorescence	מורכבים	Asteraceae			2	2	2
SVT-152	Shivta	Tepper, Bar-Oz and Gini	Daniel Fuks	2016-2020	K	172	1687	27	מורכב?	Asteraceae?	קרקפת	head	מורכבים	Asteraceae			1	1	2
SVT-152	Shivta	Tepper, Bar-Oz and Gini	Daniel Fuks	2016-2020	K	172	1687	28	ליואל								1	1	2
SVT-152	Shivta	Tepper, Bar-Oz and Gini	Daniel Fuks	2016-2020	K	172	1687	29	אמיך קוצני	Emex spinosa	פרי	fruit	ארכוביתיים	Polygonaceae			3	3	2
SVT-152	Shivta	Tepper, Bar-Oz and Gini	Daniel Fuks	2016-2020	K	172	1687	30	אמיך קוצני?	Emex spinosa?	זרע	seed	ארכוביתיים	Polygonaceae			1	1	2
SVT-152	Shivta	Tepper, Bar-Oz and Gini	Daniel Fuks	2016-2020	K	172	1687	31	Salsoleae	Salsoleae	פרקי גבעול	stem segments	סלקיים	Chenopodiaceae			1	1	2
SVT-152	Shivta	Tepper, Bar-Oz and Gini	Daniel Fuks	2016-2020	K	172	1687	32	דבקה?	Galium?			פואתיים	Rubiaceae			1	1	2
SVT-152	Shivta	Tepper, Bar-Oz and Gini	Daniel Fuks	2016-2020	K	172	1687	33	גללים										2		שבירים קטנות
SVT-152	Shivta	Tepper, Bar-Oz and Gini	Daniel Fuks	2016-2020	K	172	1687	34	בלתי-שונות										2		לא נספר
SVT-153	Shivta	Tepper, Bar-Oz and Gini	Daniel Fuks	2016-2020	K	173	1690	1	שעורה	Hordeum vulgare	גרגיר	grain	דגניים	Gramineae			27	27	2
SVT-153	Shivta	Tepper, Bar-Oz and Gini	Daniel Fuks	2016-2020	K	173	1690	2	חיטה	Triticum sp.	גרגיר	grain	דגניים	Gramineae			15	15	2
SVT-153	Shivta	Tepper, Bar-Oz and Gini	Daniel Fuks	2016-2020	K	173	1690	3	חיטה/שעורה	Hordeum/Triticum	גרגיר	grain	דגניים	Gramineae			5	5	2
SVT-153	Shivta	Tepper, Bar-Oz and Gini	Daniel Fuks	2016-2020	K	173	1690	4	שברי דגן		גרגיר	grain	דגניים	Gramineae					2		לא נספר
SVT-153	Shivta	Tepper, Bar-Oz and Gini	Daniel Fuks	2016-2020	K	173	1690	5	גפן	Vitis vinifera	חרצן	pip	גפניים	Vitaceae			2	2	2
SVT-153	Shivta	Tepper, Bar-Oz and Gini	Daniel Fuks	2016-2020	K	173	1690	6	חיטה טטרפלוידית	Triticum turgidum s.l.	פרק ציר שיבולת	rachis fragment	דגניים	Gramineae			3	3	2
SVT-153	Shivta	Tepper, Bar-Oz and Gini	Daniel Fuks	2016-2020	K	173	1690	7	חיטה טטרפלוידית	Triticum turgidum s.l.	פרק ראשון וצווארון	first rachis & collar	דגניים	Gramineae			1	1	2
SVT-153	Shivta	Tepper, Bar-Oz and Gini	Daniel Fuks	2016-2020	K	173	1690	8	חיטת הלחם	Triticum aestivum s.l.	פרק ציר שיבולת	rachis fragment	דגניים	Gramineae			1	1	2
SVT-153	Shivta	Tepper, Bar-Oz and Gini	Daniel Fuks	2016-2020	K	173	1690	9	חיטה/שעורה?	Hordeum/Triticum	פרקי גבעול	culm node	דגניים	Gramineae			14	14	2
SVT-153	Shivta	Tepper, Bar-Oz and Gini	Daniel Fuks	2016-2020	K	173	1690	10	זנב-עקרב שיכני	Scorpiurus muricatus	זרע	seed	פרפרניים	Fabaceae			2	2	2		שני שברים
SVT-153	Shivta	Tepper, Bar-Oz and Gini	Daniel Fuks	2016-2020	K	173	1690	11	עדשה?	cf. Lens culinaris	זרע	seed	פרפרניים	Fabaceae			1	1	2
SVT-153	Shivta	Tepper, Bar-Oz and Gini	Daniel Fuks	2016-2020	K	173	1690	12	מורכבים?	Asteraceae?	קרקפת	head	מורכבים	Asteraceae			1	1	2
SVT-153	Shivta	Tepper, Bar-Oz and Gini	Daniel Fuks	2016-2020	K	173	1690	13	מורכבים	Asteraceae	תפרחת	inflorescence	מורכבים	Asteraceae			1	1	2
SVT-153	Shivta	Tepper, Bar-Oz and Gini	Daniel Fuks	2016-2020	K	173	1690	14	עשנן קטן	cf. Fumaria parviflora	אגוזית	nutlet	פרגיים	Papaveraceae			1	1	2
SVT-153	Shivta	Tepper, Bar-Oz and Gini	Daniel Fuks	2016-2020	K	173	1690	15	רצנטי?	Recent?									2		לא נספר
SVT-153	Shivta	Tepper, Bar-Oz and Gini	Daniel Fuks	2016-2020	K	173	1690	16	בלתי-שונות										2		לא נספר
SVT-154	Shivta	Tepper, Bar-Oz and Gini	Daniel Fuks	2016-2020	K	173	1694	1	חיטה	Triticum sp.	גרגיר	grain	דגניים	Gramineae			14	14	2
SVT-154	Shivta	Tepper, Bar-Oz and Gini	Daniel Fuks	2016-2020	K	173	1694	2	שברי דגן		גרגיר	grain	דגניים	Gramineae					2		לא נספר
SVT-154	Shivta	Tepper, Bar-Oz and Gini	Daniel Fuks	2016-2020	K	173	1694	3	דגני	Gramineae	גרגיר	grain	דגניים	Gramineae			2	2	2
SVT-154	Shivta	Tepper, Bar-Oz and Gini	Daniel Fuks	2016-2020	K	173	1694	4	זון משכר?	Lolium temulentum?	גרגיר	grain	דגניים	Gramineae			1	1	2
SVT-154	Shivta	Tepper, Bar-Oz and Gini	Daniel Fuks	2016-2020	K	173	1694	5	שעורה שש-טורית	Hordeum vulgare hexastichum	פרק ציר שיבולת	rachis fragment	דגניים	Gramineae			1	1	2
SVT-154	Shivta	Tepper, Bar-Oz and Gini	Daniel Fuks	2016-2020	K	173	1694	6	חיטה טטרפלוידית	Triticum turgidum s.l.	פרק ראשון וצאוורון	first rachis &collar	דגניים	Gramineae			1	1	2
SVT-154	Shivta	Tepper, Bar-Oz and Gini	Daniel Fuks	2016-2020	K	173	1694	7	אמיך קוצני	Emex spinosa	פרי	fruit	ארכוביתיים	Polygonaceae			1	1	2
SVT-154	Shivta	Tepper, Bar-Oz and Gini	Daniel Fuks	2016-2020	K	173	1694	8	חיטה/שעורה cf.	cf. Hordeum/Triticum	פרקי גבעול	culm node	דגניים	Gramineae			6	6	2
SVT-154	Shivta	Tepper, Bar-Oz and Gini	Daniel Fuks	2016-2020	K	173	1694	9	חיטה/שעורה cf.	cf. Hordeum/Triticum	שורש דגן	culm root	דגניים	Gramineae			4	4	2
SVT-154	Shivta	Tepper, Bar-Oz and Gini	Daniel Fuks	2016-2020	K	173	1694	10	בלתי-שונות										2		לא נספר
SVT-155	Shivta	Tepper, Bar-Oz and Gini	Daniel Fuks	2016-2020	K	173	1697	1	שעורה	Hordeum vulgare	גרגיר	grain	דגניים	Gramineae			2	2	2
SVT-155	Shivta	Tepper, Bar-Oz and Gini	Daniel Fuks	2016-2020	K	173	1697	2	שברי דגן		גרגיר	grain	דגניים	Gramineae					2
SVT-155	Shivta	Tepper, Bar-Oz and Gini	Daniel Fuks	2016-2020	K	173	1697	3	חיטה טטרפלוידית	Triticum turgidum s.l.	פרק ציר שיבולת	rachis fragment	דגניים	Gramineae			2	2	2		4 פרקים
SVT-155	Shivta	Tepper, Bar-Oz and Gini	Daniel Fuks	2016-2020	K	173	1697	4	אמיך קוצני	Emex spinosa	פרי	fruit	ארכוביתיים	Polygonaceae			1	1	2
SVT-155	Shivta	Tepper, Bar-Oz and Gini	Daniel Fuks	2016-2020	K	173	1697	5	חיטה/שעורה cf.	cf. Hordeum/Triticum	פרקי גבעול	culm node	דגניים	Gramineae			4	4	2
SVT-155	Shivta	Tepper, Bar-Oz and Gini	Daniel Fuks	2016-2020	K	173	1697	6	חיטה/שעורה cf.	cf. Hordeum/Triticum	שורש דגן	culm root	דגניים	Gramineae			1	1	2
SVT-155	Shivta	Tepper, Bar-Oz and Gini	Daniel Fuks	2016-2020	K	173	1697	7	בלתי-שונות										2		לא נספר
SVT-156	Shivta	Tepper, Bar-Oz and Gini	Daniel Fuks	2016-2020	K	174	1706	1	שעורה	Hordeum vulgare	גרגיר	grain	דגניים	Gramineae			1	1	2
SVT-156	Shivta	Tepper, Bar-Oz and Gini	Daniel Fuks	2016-2020	K	174	1706	2	חיטה	Triticum sp.	גרגיר	grain	דגניים	Gramineae			1	1	2
SVT-156	Shivta	Tepper, Bar-Oz and Gini	Daniel Fuks	2016-2020	K	174	1706	3	דגני?		גרגיר	grain	?דגניים	Gramineae?			1	1	2
SVT-156	Shivta	Tepper, Bar-Oz and Gini	Daniel Fuks	2016-2020	K	174	1706	4	חיטה/שעורה cf.	cf. Hordeum/Triticum	פרקי גבעול	culm node	דגניים	Gramineae			4	4	2
SVT-156	Shivta	Tepper, Bar-Oz and Gini	Daniel Fuks	2016-2020	K	174	1706	5	בקיית הכרשינה	Vicia ervilia	פסיג	cotyledon	פרפרניים	Fabaceae			1	1	2
SVT-156	Shivta	Tepper, Bar-Oz and Gini	Daniel Fuks	2016-2020	K	174	1706	6	בקיים	Vicieae	זרע	seed	פרפרניים	Fabaceae			1	1	2
SVT-156	Shivta	Tepper, Bar-Oz and Gini	Daniel Fuks	2016-2020	K	174	1706	7	בלתי-שונות										2		לא נספר
SVT-157	Shivta	Tepper, Bar-Oz and Gini	Daniel Fuks	2016-2020	K	175	1710	1	שעורה	Hordeum vulgare	גרגיר	grain	דגניים	Gramineae			4	4	2
SVT-157	Shivta	Tepper, Bar-Oz and Gini	Daniel Fuks	2016-2020	K	175	1710	2	חיטה	Triticum sp.	גרגיר	grain	דגניים	Gramineae			9	9	2
SVT-157	Shivta	Tepper, Bar-Oz and Gini	Daniel Fuks	2016-2020	K	175	1710	3	חיטה/שעורה	Hordeum/Triticum	גרגיר	grain	דגניים	Gramineae			3	3	2		כנראה שעורה
SVT-157	Shivta	Tepper, Bar-Oz and Gini	Daniel Fuks	2016-2020	K	175	1710	4	גפן	Vitis vinifera	חרצן	pip	גפניים	Vitaceae			3	3	2
SVT-157	Shivta	Tepper, Bar-Oz and Gini	Daniel Fuks	2016-2020	K	175	1710	5	גפן	Vitis vinifera	עוקץ	pedicel	גפניים	Vitaceae			1	1	2
SVT-157	Shivta	Tepper, Bar-Oz and Gini	Daniel Fuks	2016-2020	K	175	1710	6	חיטה טטרפלוידית	Triticum turgidum s.l.	פרק ציר שיבולת	rachis fragment	דגניים	Gramineae			1	1	2
SVT-157	Shivta	Tepper, Bar-Oz and Gini	Daniel Fuks	2016-2020	K	175	1710	7	חיטה	Triticum sp.	צאוורון	collar	דגניים	Gramineae			2	2	2
SVT-157	Shivta	Tepper, Bar-Oz and Gini	Daniel Fuks	2016-2020	K	175	1710	8	חיטה/שעורה	Hordeum/Triticum	פרקי גבעול	culm node	דגניים	Gramineae			19	19	2
SVT-157	Shivta	Tepper, Bar-Oz and Gini	Daniel Fuks	2016-2020	K	175	1710	9	חיטה/שעורה	Hordeum/Triticum	שורש דגן	culm root	דגניים	Gramineae			1	1	2
SVT-157	Shivta	Tepper, Bar-Oz and Gini	Daniel Fuks	2016-2020	K	175	1710	10	אמיך קוצני	Emex spinosa	פרי	fruit	ארכוביתיים	Polygonaceae			1	1	2
SVT-157	Shivta	Tepper, Bar-Oz and Gini	Daniel Fuks	2016-2020	K	175	1710	11	מתנן שעיר	Thymelaea hirsuta	עלה	leaf	מתנניים	Thymelaeaceae			1	1	2
SVT-157	Shivta	Tepper, Bar-Oz and Gini	Daniel Fuks	2016-2020	K	175	1710	12	מתנן שעיר	Thymelaea hirsuta	פרי	fruit	מתנניים	Thymelaeaceae			1	1	2
SVT-157	Shivta	Tepper, Bar-Oz and Gini	Daniel Fuks	2016-2020	K	175	1710	13	ציפורני החתול	Calendula sp.	זרעון	achene	מורכבים	Asteraceae			2	2	2
SVT-157	Shivta	Tepper, Bar-Oz and Gini	Daniel Fuks	2016-2020	K	175	1710	14	ליואל								1	1	2
SVT-157	Shivta	Tepper, Bar-Oz and Gini	Daniel Fuks	2016-2020	K	175	1710	15	ליואל								1	1	2
SVT-157	Shivta	Tepper, Bar-Oz and Gini	Daniel Fuks	2016-2020	K	175	1710	16	בלתי-שונות												לא נספר
SVT-54	Shivta	Tepper, Bar-Oz and Gini	Daniel Fuks	2016-2020	K	150	1503	1	חיטה	Triticum sp.	גרגיר	grain	דגניים	Gramineae	1		1	1	2
SVT-54	Shivta	Tepper, Bar-Oz and Gini	Daniel Fuks	2016-2020	K	150	1503	2	גפן	Vitis vinifera	חרצן	pip	גפניים	Vitaceae	1		1	1	2
SVT-54	Shivta	Tepper, Bar-Oz and Gini	Daniel Fuks	2016-2020	K	150	1503	3	בלתי						16		16	16	2
SVT-54	Shivta	Tepper, Bar-Oz and Gini	Daniel Fuks	2016-2020	K	150	1503	4	אמיך קוצני	Emex spinosa	פרי	fruit	ארכוביתיים	Polygonaceae	9		9	9	2		רצנטי
SVT-54	Shivta	Tepper, Bar-Oz and Gini	Daniel Fuks	2016-2020	K	150	1503	5	כנפן קוצני	Pteranthus dichotomus	יחידת הפצה	dispersal unit	ציפורניים	Caryophyllaceae	1		1	1	2		רצנטי
SVT-54	Shivta	Tepper, Bar-Oz and Gini	Daniel Fuks	2016-2020	K	150	1503	6	מלוח	Atriplex	יחידת הפצה	dispersal unit	סלקיים	Chenopodiaceae	2		2	2	2		רצנטי
SVT-54	Shivta	Tepper, Bar-Oz and Gini	Daniel Fuks	2016-2020	K	150	1503	7	כף אווז	Chenopodium sp.	זרע	seed	סלקיים	Chenopodiaceae	8		8	8	2		רצנטי
SVT-55	Shivta	Tepper, Bar-Oz and Gini	Daniel Fuks	2016-2020	K	150	1503	8	בלתי							6	6	6	2		heavy f
SVT-55	Shivta	Tepper, Bar-Oz and Gini	Daniel Fuks	2016-2020	K	151	1507-A	1	שעורה תרבותית	Hordeum vulgare	גרגיר	grain	Gramineae	דגניים	5		5	5	2
SVT-55	Shivta	Tepper, Bar-Oz and Gini	Daniel Fuks	2016-2020	K	151	1507-A	2	חיטה	Triticum sp.	גרגיר	grain	דגניים	Gramineae	2		2	2	2
SVT-55	Shivta	Tepper, Bar-Oz and Gini	Daniel Fuks	2016-2020	K	151	1507-A	3	חיטה/שעורה	Hordeum/Triticum	גרגיר	grain	דגניים	Gramineae	3		3	3	2		שברים
SVT-55	Shivta	Tepper, Bar-Oz and Gini	Daniel Fuks	2016-2020	K	151	1507-A	4	גפן	Vitis vinifera	חרצן	pip	גפניים	Vitaceae	3		3	3	2
SVT-55	Shivta	Tepper, Bar-Oz and Gini	Daniel Fuks	2016-2020	K	151	1507-A	5			פרק גבעול	culm node	דגניים	Gramineae	4		4	4	2
SVT-55	Shivta	Tepper, Bar-Oz and Gini	Daniel Fuks	2016-2020	K	151	1507-A	6	בקיים		פסיגים	cotyledon	פרפרניים	Fabaceae	1		1	1	2		?פסיג כרשינה
SVT-55	Shivta	Tepper, Bar-Oz and Gini	Daniel Fuks	2016-2020	K	151	1507-A	7	אמיך קוצני	Emex spinosa	פרי	fruit	ארכוביתיים	Polygonaceae	1	1	2	2	2		רצנטי
SVT-55	Shivta	Tepper, Bar-Oz and Gini	Daniel Fuks	2016-2020	K	151	1507-A	8	בלתי מזוהה		ציפה?	pulp?			1		1	1	2		יואל: אולי ציפה של פרי. ראה קווים. מזכיר ציפה של זית אך לא...
SVT-55	Shivta	Tepper, Bar-Oz and Gini	Daniel Fuks	2016-2020	K	151	1507-A	9	בלתי מזוהה		זרע	seed			1		1	1	2
SVT-55	Shivta	Tepper, Bar-Oz and Gini	Daniel Fuks	2016-2020	K	151	1507-A	10	שבר דגן							1	1	1	2
SVT-55	Shivta	Tepper, Bar-Oz and Gini	Daniel Fuks	2016-2020	K	151	1507-A	11	בלתי								0	0	2
SVT-55	Shivta	Tepper, Bar-Oz and Gini	Daniel Fuks	2016-2020	K	151	1507-A	12	חרק								0	0	2
SVT-55	Shivta	Tepper, Bar-Oz and Gini	Daniel Fuks	2016-2020	K	151	1507-A	13	גלל								0	0	2		heavy f
SVT-56	Shivta	Tepper, Bar-Oz and Gini	Daniel Fuks	2016-2020	K	151	1517	1	שעורה תרבותית	Hordeum vulgare	גרגיר	grain	דגניים	Gramineae	7		7	7	2
SVT-56	Shivta	Tepper, Bar-Oz and Gini	Daniel Fuks	2016-2020	K	151	1517	2	חיטה/שעורה	Hordeum/Triticum	גרגיר	grain	דגניים	Gramineae	3		3	3	2
SVT-56	Shivta	Tepper, Bar-Oz and Gini	Daniel Fuks	2016-2020	K	151	1517	3	גפן	Vitis vinifera	חרצן	pip	גפניים	Vitaceae	1	1	2	2	2
SVT-56	Shivta	Tepper, Bar-Oz and Gini	Daniel Fuks	2016-2020	K	151	1517	4	גפן	Vitis vinifera	עוקץ	pedicel	גפניים	Vitaceae	0	1	1	1	2
SVT-56	Shivta	Tepper, Bar-Oz and Gini	Daniel Fuks	2016-2020	K	151	1517	5	גפן	Vitis vinifera	זג	exocarp	גפניים	Vitaceae	0	3	3	3	2
SVT-56	Shivta	Tepper, Bar-Oz and Gini	Daniel Fuks	2016-2020	K	151	1517	6	זית אירופאי	Olea europaea	שבר קליפת הזרע	seed coat fragment	זיתיים	Oleaceae	0	1	1	1	2
SVT-56	Shivta	Tepper, Bar-Oz and Gini	Daniel Fuks	2016-2020	K	151	1517	7	תמר מצוי cf.	cf. Phoenix dactylifera	שבר גלעין	stone fragment	Palmae?	דקליים?	0	1	0	0	2
SVT-56	Shivta	Tepper, Bar-Oz and Gini	Daniel Fuks	2016-2020	K	151	1517	8	בלתי מזוהה						0	8	8	8	2
SVT-56	Shivta	Tepper, Bar-Oz and Gini	Daniel Fuks	2016-2020	K	151	1517	9			פרק גבעול	culm node	דגניים	Gramineae	1		1	1	2
SVT-56	Shivta	Tepper, Bar-Oz and Gini	Daniel Fuks	2016-2020	K	151	1517	10	מלען		שבר מלען	awn fragment	דגניים	Gramineae	1		1	1	2		מפוחם
SVT-56	Shivta	Tepper, Bar-Oz and Gini	Daniel Fuks	2016-2020	K	151	1517	11	אמיך קוצני	Emex spinosa	פרי	fruit	ארכוביתיים	Polygonaceae	1		1	1	2
SVT-56	Shivta	Tepper, Bar-Oz and Gini	Daniel Fuks	2016-2020	K	151	1517	12	דגני להגדרה		גרגיר	grain	דגניים	Gramineae	1		1	1	2		כולל אמיך, חלמית
SVT-56	Shivta	Tepper, Bar-Oz and Gini	Daniel Fuks	2016-2020	K	151	1517	13	?רצנטי						7		7	7	2
SVT-56	Shivta	Tepper, Bar-Oz and Gini	Daniel Fuks	2016-2020	K	151	1517	14	חרוב מצוי	Ceratonia siliqua	עלי	pistil			0	1	1	1	2
SVT-56	Shivta	Tepper, Bar-Oz and Gini	Daniel Fuks	2016-2020	K	151	1517	15	?תמר	Phoenix dactylifera?	שבר גלעין	stone fragment	Palmae?	דקליים?		1	1	0	2
SVT-56	Shivta	Tepper, Bar-Oz and Gini	Daniel Fuks	2016-2020	K	151	1517	16	בקיית הכרישנה	Vicia ervilia	פסיג	cotyledon					0	0	2
SVT-56	Shivta	Tepper, Bar-Oz and Gini	Daniel Fuks	2016-2020	K	151	1517	17	שעורה שש-טורית	Hordeum vulgare hexastichum	פרק ציר שיבולת	rachis fragment	דגניים	Gramineae	1		1	1	2		1 piece with 2 segments
SVT-56	Shivta	Tepper, Bar-Oz and Gini	Daniel Fuks	2016-2020	K	151	1517	18	חיטה טטרפלוידית	Triticum turgidum s.l.	פרק ציר שיבולת	rachis fragment	דגניים	Gramineae	1		1	1	2		1 piece with 2 segments
SVT-56	Shivta	Tepper, Bar-Oz and Gini	Daniel Fuks	2016-2020	K	151	1517	19	חיטת הלחם	Triticum aestivum s.l.	פרק ציר שיבולת	rachis fragment	דגניים	Gramineae	1		1	1	2		1
SVT-56	Shivta	Tepper, Bar-Oz and Gini	Daniel Fuks	2016-2020	K	151	1517	20	חיטת הלחם?	cf. Triticum aestivum	פרק ראשון	first rachis	דגניים	Gramineae	1		1	1	2
SVT-56	Shivta	Tepper, Bar-Oz and Gini	Daniel Fuks	2016-2020	K	151	1517	21	חיטה/שעורה	Hordeum/Triticum	גרגיר	grain	דגניים	Gramineae	1		1	1	1
SVT-56	Shivta	Tepper, Bar-Oz and Gini	Daniel Fuks	2016-2020	K	151	1517	22			פרק גבעול	culm node	דגניים	Gramineae	16		16	16	1
SVT-56	Shivta	Tepper, Bar-Oz and Gini	Daniel Fuks	2016-2020	K	151	1517	23			שורשי דגן	roots	דגניים	Gramineae	1		1	1	1
SVT-56	Shivta	Tepper, Bar-Oz and Gini	Daniel Fuks	2016-2020	K	151	1517	24			שבר מלען	awn fragment	דגניים	Gramineae			1	0	1
SVT-56	Shivta	Tepper, Bar-Oz and Gini	Daniel Fuks	2016-2020	K	151	1517	25	שעורה שש-טורית	Hordeum vulgare hexastichum	פרק ציר שיבולת	rachis fragment	דגניים	Gramineae	6		6	6	1		1 piece with 3 segments
SVT-56	Shivta	Tepper, Bar-Oz and Gini	Daniel Fuks	2016-2020	K	151	1517	26	שעורה דו-טורית	Hordeum vulgare distichum	פרק ציר שיבולת	rachis fragment	דגניים	Gramineae	1		1	1	1		1 piece with 2 segments
SVT-56	Shivta	Tepper, Bar-Oz and Gini	Daniel Fuks	2016-2020	K	151	1517	27	שעורה	Hordeum vulgare ssp.	פרק ציר שיבולת	rachis fragment	דגניים	Gramineae	3		3	3	1		1 piece with 2 segments
SVT-56	Shivta	Tepper, Bar-Oz and Gini	Daniel Fuks	2016-2020	K	151	1517	28	חיטה טטרפלוידית	Triticum turgidum s.l.	פרק ציר שיבולת	rachis fragment	דגניים	Gramineae	2		2	2	1
SVT-56	Shivta	Tepper, Bar-Oz and Gini	Daniel Fuks	2016-2020	K	151	1517	29	חיטת הלחם	Triticum aestivum s.l.	פרק ציר שיבולת	rachis fragment	דגניים	Gramineae	4		4	4	1
SVT-56	Shivta	Tepper, Bar-Oz and Gini	Daniel Fuks	2016-2020	K	151	1517	30	חיטה	Triticum sp.	פרק ציר שיבולת	rachis fragment	דגניים	Gramineae	2		2	2	1
SVT-56	Shivta	Tepper, Bar-Oz and Gini	Daniel Fuks	2016-2020	K	151	1517	31	חיטה/שעורה	Hordeum/Triticum	פרק ציר שיבולת	rachis fragment	דגניים	Gramineae	3		3	3	1
SVT-56	Shivta	Tepper, Bar-Oz and Gini	Daniel Fuks	2016-2020	K	151	1517	32			פרק ראשון	first rachis	דגניים	Gramineae	6		6	6	1
SVT-56	Shivta	Tepper, Bar-Oz and Gini	Daniel Fuks	2016-2020	K	151	1517	33	גלעינית זעירת פרחים	Buglossoides tenuiflora	זרע	seed	זיפניים	Boraginaceae	2		2	2	1
SVT-56	Shivta	Tepper, Bar-Oz and Gini	Daniel Fuks	2016-2020	K	151	1517	34	מתנן שעיר		פרי				2		2	2	1
SVT-56	Shivta	Tepper, Bar-Oz and Gini	Daniel Fuks	2016-2020	K	151	1517	35	מתנן שעיר		עלה				1		1	1	1
SVT-56	Shivta	Tepper, Bar-Oz and Gini	Daniel Fuks	2016-2020	K	151	1517	36	פרפרני ליואל		זרע	seed	פרפרניים	Fabaceae	1		1	1	1
SVT-56	Shivta	Tepper, Bar-Oz and Gini	Daniel Fuks	2016-2020	K	151	1517	37	בלתי ליואל						1		1	1	1
SVT-56	Shivta	Tepper, Bar-Oz and Gini	Daniel Fuks	2016-2020	K	151	1517	38	שונות						3		3	3	1
SVT-56	Shivta	Tepper, Bar-Oz and Gini	Daniel Fuks	2016-2020	K	151	1517	39	בלתי-שונות								0	0	1
SVT-56	Shivta	Tepper, Bar-Oz and Gini	Daniel Fuks	2016-2020	K	151	1517	40	רצנטי								0	0	1
SVT-56	Shivta	Tepper, Bar-Oz and Gini	Daniel Fuks	2016-2020	K	151	1517	41	עצם						1		1	1	1
SVT-57	Shivta	Tepper, Bar-Oz and Gini	Daniel Fuks	2016-2020	K	151	1519	1	שעורה תרבותית	Hordeum vulgare	גרגיר	grain	Gramineae	דגניים	16	1	17	17	2
SVT-57	Shivta	Tepper, Bar-Oz and Gini	Daniel Fuks	2016-2020	K	151	1519	2	חיטה	Triticum sp.	גרגיר	grain	דגניים	Gramineae	15	2	17	17	2		כולל שברים(7)
SVT-57	Shivta	Tepper, Bar-Oz and Gini	Daniel Fuks	2016-2020	K	151	1519	3	חיטה/שעורה	Hordeum/Triticum	גרגיר	grain	דגניים	Gramineae	13	1	14	14	2
SVT-57	Shivta	Tepper, Bar-Oz and Gini	Daniel Fuks	2016-2020	K	151	1519	4	גפן	Vitis vinifera	חרצן	pip	גפניים	Vitaceae	7	1	8	8	2
SVT-57	Shivta	Tepper, Bar-Oz and Gini	Daniel Fuks	2016-2020	K	151	1519	5			פרק גבעול	culm node	דגניים	Gramineae	8		8	8	2
SVT-57	Shivta	Tepper, Bar-Oz and Gini	Daniel Fuks	2016-2020	K	151	1519	6			פרק ציר שיבולת	rachis fragment	דגניים	Gramineae	1	1	2	2	2		לחבר בהמשך
SVT-57	Shivta	Tepper, Bar-Oz and Gini	Daniel Fuks	2016-2020	K	151	1519	7			מוץ	chaff	דגניים	Gramineae	2		2	2	2
SVT-57	Shivta	Tepper, Bar-Oz and Gini	Daniel Fuks	2016-2020	K	151	1519	8	גפן	Vitis vinifera	זג	exocarp	גפניים	Vitaceae	1		1	1	2
SVT-57	Shivta	Tepper, Bar-Oz and Gini	Daniel Fuks	2016-2020	K	151	1519	9	בקיים		פסיגים	cotyledon	פרפרניים	Fabaceae	1		1	1	2		לוודא
SVT-57	Shivta	Tepper, Bar-Oz and Gini	Daniel Fuks	2016-2020	K	151	1519	10	תמר מצוי	Phoenix dactylifera	חותם	?	דקליים	Palmae	1		1	1	2
SVT-57	Shivta	Tepper, Bar-Oz and Gini	Daniel Fuks	2016-2020	K	151	1519	11	בלתי מזוהה		קליפת זרע?	seed coat fragment?			1		1	1	2		לא להתעסק
SVT-57	Shivta	Tepper, Bar-Oz and Gini	Daniel Fuks	2016-2020	K	151	1519	12	בלתי מזוהה						4		4	4	2
SVT-57	Shivta	Tepper, Bar-Oz and Gini	Daniel Fuks	2016-2020	K	151	1519	13	גללים								0	0	2
SVT-57	Shivta	Tepper, Bar-Oz and Gini	Daniel Fuks	2016-2020	K	151	1519	14	שברי דגן							5	5	5	2
SVT-57	Shivta	Tepper, Bar-Oz and Gini	Daniel Fuks	2016-2020	K	151	1519	15	זית אירופאי?	Olea europaea	זרע	seed	זיתיים	Oleaceae		1	1	1	2
SVT-57	Shivta	Tepper, Bar-Oz and Gini	Daniel Fuks	2016-2020	K	151	1519	16	תמר מצוי	Phoenix dactylifera	שבר גלעין	stone fragment	דקליים	Palmae		5	1	1	2
SVT-57	Shivta	Tepper, Bar-Oz and Gini	Daniel Fuks	2016-2020	K	151	1519	17	בלתי							2	2	2	2
SVT-57	Shivta	Tepper, Bar-Oz and Gini	Daniel Fuks	2016-2020	K	151	1519	18	בלתי								0	0	2
SVT-57	Shivta	Tepper, Bar-Oz and Gini	Daniel Fuks	2016-2020	K	151	1519	19	?חרק							1	1	1	2
SVT-57	Shivta	Tepper, Bar-Oz and Gini	Daniel Fuks	2016-2020	K	151	1519	20	פרפרני?							2	2	2	2
SVT-58	Shivta	Tepper, Bar-Oz and Gini	Daniel Fuks	2016-2020	K	151	1521	1	שעורה תרבותית	Hordeum vulgare	גרגיר	grain	Gramineae	דגניים	17		17	17	2
SVT-58	Shivta	Tepper, Bar-Oz and Gini	Daniel Fuks	2016-2020	K	151	1521	2	חיטה	Triticum sp.	גרגיר	grain	דגניים	Gramineae	8		8	8	2
SVT-58	Shivta	Tepper, Bar-Oz and Gini	Daniel Fuks	2016-2020	K	151	1521	3	חיטה/שעורה	Hordeum/Triticum	גרגיר	grain	דגניים	Gramineae	5	3	8	8	2
SVT-58	Shivta	Tepper, Bar-Oz and Gini	Daniel Fuks	2016-2020	K	151	1521	4	גפן	Vitis vinifera	חרצן	pip	גפניים	Vitaceae	5	6	11	11	2
SVT-58	Shivta	Tepper, Bar-Oz and Gini	Daniel Fuks	2016-2020	K	151	1521	5	רימון מצוי	Punica granatum	קליפה	rind fragment	רימוניים	Lythraceae	2		2	2	2
SVT-58	Shivta	Tepper, Bar-Oz and Gini	Daniel Fuks	2016-2020	K	151	1521	6	גפן	Vitis vinifera	זג	exocarp	גפניים	Vitaceae	1	1	2	2	2
SVT-58	Shivta	Tepper, Bar-Oz and Gini	Daniel Fuks	2016-2020	K	151	1521	7			פרק גבעול	culm node	דגניים	Gramineae	19		19	19	2
SVT-58	Shivta	Tepper, Bar-Oz and Gini	Daniel Fuks	2016-2020	K	151	1521	8	קטנית		זרע	seed	פרפרניים	Fabaceae	1		1	1	2
SVT-58	Shivta	Tepper, Bar-Oz and Gini	Daniel Fuks	2016-2020	K	151	1521	9	?עדשה		זרע	seed	פרפרניים	Fabaceae	1		1	1	2
SVT-58	Shivta	Tepper, Bar-Oz and Gini	Daniel Fuks	2016-2020	K	151	1521	10	?דגניים						2		2	2	2		?פסיג כרשינה
SVT-58	Shivta	Tepper, Bar-Oz and Gini	Daniel Fuks	2016-2020	K	151	1521	11	בקיית הכרשינה	Vicia ervilia	פסיגים	cotyledon	פרפרניים	Fabaceae	1		1	1	2
SVT-58	Shivta	Tepper, Bar-Oz and Gini	Daniel Fuks	2016-2020	K	151	1521	12	?בלתי-קטניות						3		3	3	2
SVT-58	Shivta	Tepper, Bar-Oz and Gini	Daniel Fuks	2016-2020	K	151	1521	13	בלתי-לא להתעסק								0	0	2
SVT-58	Shivta	Tepper, Bar-Oz and Gini	Daniel Fuks	2016-2020	K	151	1521	14	בלתי						1		1	1	2
SVT-58	Shivta	Tepper, Bar-Oz and Gini	Daniel Fuks	2016-2020	K	151	1521	15	בלתי						1		1	1	2
SVT-58	Shivta	Tepper, Bar-Oz and Gini	Daniel Fuks	2016-2020	K	151	1521	16	בלתי						1		1	1	2
SVT-58	Shivta	Tepper, Bar-Oz and Gini	Daniel Fuks	2016-2020	K	151	1521	17	בלתי						1		1	1	2
SVT-58	Shivta	Tepper, Bar-Oz and Gini	Daniel Fuks	2016-2020	K	151	1521	18	בלתי						1		1	1	2
SVT-58	Shivta	Tepper, Bar-Oz and Gini	Daniel Fuks	2016-2020	K	151	1521	19	רצנטי				מורכבים		1		1	1	2
SVT-58	Shivta	Tepper, Bar-Oz and Gini	Daniel Fuks	2016-2020	K	151	1521	20	רצנטי						1		1	1	2
SVT-58	Shivta	Tepper, Bar-Oz and Gini	Daniel Fuks	2016-2020	K	151	1521	21	רצנטי						1		1	1	2
SVT-58	Shivta	Tepper, Bar-Oz and Gini	Daniel Fuks	2016-2020	K	151	1521	22	בלתי						1		1	1	2
SVT-58	Shivta	Tepper, Bar-Oz and Gini	Daniel Fuks	2016-2020	K	151	1521	23	?בר-עכנאי						2		2	2	2		רצנטי
SVT-58	Shivta	Tepper, Bar-Oz and Gini	Daniel Fuks	2016-2020	K	151	1521	24	חלמית						1		1	1	2		רצנטי
SVT-58	Shivta	Tepper, Bar-Oz and Gini	Daniel Fuks	2016-2020	K	151	1521	25	אמיך קוצני	Emex spinosa	פרי	fruit	ארכוביתיים	Polygonaceae	3	1	4	4	2		רצנטי
SVT-58	Shivta	Tepper, Bar-Oz and Gini	Daniel Fuks	2016-2020	K	151	1521	26	שברי גלל						3	1	4	4	2		מפוחם
SVT-58	Shivta	Tepper, Bar-Oz and Gini	Daniel Fuks	2016-2020	K	151	1521	27	גללים-מכרסמים								0	0	2		רצנטי
SVT-58	Shivta	Tepper, Bar-Oz and Gini	Daniel Fuks	2016-2020	K	151	1521	28	תמר מצוי	Phoenix dactylifera	שבר גלעין	stone fragment	דקליים	Palmae		3	1	1	2
SVT-58	Shivta	Tepper, Bar-Oz and Gini	Daniel Fuks	2016-2020	K	151	1521	29	בקיים		פסיגים	cotyledon	פרפרניים	Fabaceae		6	6	6	2
SVT-58	Shivta	Tepper, Bar-Oz and Gini	Daniel Fuks	2016-2020	K	151	1521	30	?עדשה		פסיג					2	2	2	2
SVT-58	Shivta	Tepper, Bar-Oz and Gini	Daniel Fuks	2016-2020	K	151	1521	31	בקיי להגדרה							1	1	1	2
SVT-58	Shivta	Tepper, Bar-Oz and Gini	Daniel Fuks	2016-2020	K	151	1521	32	אמיך קוצני	Emex spinosa	פרי	fruit	ארכוביתיים	Polygonaceae			0	0	2		מפוחם
SVT-58	Shivta	Tepper, Bar-Oz and Gini	Daniel Fuks	2016-2020	K	151	1521	33	שברי דגן								0	0	2
SVT-58	Shivta	Tepper, Bar-Oz and Gini	Daniel Fuks	2016-2020	K	151	1521	34	בלתי		קליפת רימון??						0	0	2
SVT-58	Shivta	Tepper, Bar-Oz and Gini	Daniel Fuks	2016-2020	K	151	1521	35	?שן								0	0	2
SVT-59	Shivta	Tepper, Bar-Oz and Gini	Daniel Fuks	2016-2020	K	151	1521	6	פרקי דגן						13	1	14	14	2
SVT-59	Shivta	Tepper, Bar-Oz and Gini	Daniel Fuks	2016-2020	K	151	1521	7	חלקי שדרה						4		4	4	2		רצנטי ומפוחם
SVT-59	Shivta	Tepper, Bar-Oz and Gini	Daniel Fuks	2016-2020	K	151	1521	8	אמיך קוצני	Emex spinosa	פרי	fruit	ארכוביתיים	Polygonaceae	5		5	5	2
SVT-59	Shivta	Tepper, Bar-Oz and Gini	Daniel Fuks	2016-2020	K	151	1521	9	תמר מצוי	Phoenix dactylifera	שבר גלעין	stone fragment	דקליים	Palmae	1		1	1	2
SVT-59	Shivta	Tepper, Bar-Oz and Gini	Daniel Fuks	2016-2020	K	151	1521	10	בקיים		פסיגים	cotyledon	פרפרניים	Fabaceae	2		2	2	2
SVT-59	Shivta	Tepper, Bar-Oz and Gini	Daniel Fuks	2016-2020	K	151	1521	11	גללים								0	0	2
SVT-59	Shivta	Tepper, Bar-Oz and Gini	Daniel Fuks	2016-2020	K	151	1521	12	?בלתי- ציפה						10		10	10	2
SVT-59	Shivta	Tepper, Bar-Oz and Gini	Daniel Fuks	2016-2020	K	151	1521	13	?בלתי-דגני						1		1	1	2		ליואל
SVT-59	Shivta	Tepper, Bar-Oz and Gini	Daniel Fuks	2016-2020	K	151	1521	14	בלתי						2		2	2	2		ליואל
SVT-59	Shivta	Tepper, Bar-Oz and Gini	Daniel Fuks	2016-2020	K	151	1521	15	בלתי						2		2	2	2		חסר
SVT-59	Shivta	Tepper, Bar-Oz and Gini	Daniel Fuks	2016-2020	K	151	1521	16	?קרקפת-מורכבים								0	0	2
SVT-59	Shivta	Tepper, Bar-Oz and Gini	Daniel Fuks	2016-2020	K	151	1521	17	גפן	Vitis vinifera	עוקץ	pedicel	גפניים	Vitaceae		1	1	1	2
SVT-59	Shivta	Tepper, Bar-Oz and Gini	Daniel Fuks	2016-2020	K	151	1521	18	גפן	Vitis vinifera	זג	exocarp	גפניים	Vitaceae			0	0	2
SVT-59	Shivta	Tepper, Bar-Oz and Gini	Daniel Fuks	2016-2020	K	151	1521	19	בקיית הכרישנה	Vicia ervilia	פסיג	cotyledon				1	1	1	2
SVT-59	Shivta	Tepper, Bar-Oz and Gini	Daniel Fuks	2016-2020	K	151	1521	20	קטנית?		זרע שבור						0	0	2
SVT-59	Shivta	Tepper, Bar-Oz and Gini	Daniel Fuks	2016-2020	K	151	1521	21	בלתי								0	0	2
SVT-59	Shivta	Tepper, Bar-Oz and Gini	Daniel Fuks	2016-2020	K	151	1521	22	בלתי								0	0	2
SVT-59	Shivta	Tepper, Bar-Oz and Gini	Daniel Fuks	2016-2020	K	151	1521	23	בלתי-שונות								0	0	2		לא להתעסק HF
SVT-59	Shivta	Tepper, Bar-Oz and Gini	Daniel Fuks	2016-2020	K	151	1521	24	עצמות								0	0	2		HF
SVT-59	Shivta	Tepper, Bar-Oz and Gini	Daniel Fuks	2016-2020	K	151	1552	1	שעורה תרבותית	Hordeum vulgare	גרגיר	grain	Gramineae	דגניים	39	7	46	46	2
SVT-59	Shivta	Tepper, Bar-Oz and Gini	Daniel Fuks	2016-2020	K	151	1552	2	חיטה	Triticum sp.	גרגיר	grain	דגניים	Gramineae	18		18	18	2
SVT-59	Shivta	Tepper, Bar-Oz and Gini	Daniel Fuks	2016-2020	K	151	1552	3	חיטה/שעורה	Hordeum/Triticum	גרגיר	grain	דגניים	Gramineae	10		10	10	2
SVT-59	Shivta	Tepper, Bar-Oz and Gini	Daniel Fuks	2016-2020	K	151	1552	4	גפן	Vitis vinifera	חרצן	pip	גפניים	Vitaceae	7	3	10	10	2
SVT-59	Shivta	Tepper, Bar-Oz and Gini	Daniel Fuks	2016-2020	K	151	1552	5	שברי חיטה/שעורה	Hordeum/Triticum	גרגיר	grain	דגניים	Gramineae			0	0	2
SVT-60	Shivta	Tepper, Bar-Oz and Gini	Daniel Fuks	2016-2020	K	151	1625	1	שעורה תרבותית	Hordeum vulgare	גרגיר	grain	דגניים	Gramineae			38	38	2		היה 23 + 5. תוקן ל-38 בסך הכל ב-21.2.23
SVT-60	Shivta	Tepper, Bar-Oz and Gini	Daniel Fuks	2016-2020	K	151	1625	2	חיטה	Triticum sp.	גרגיר	grain	דגניים	Gramineae	14		14	14	2		היה 15, עודכן ל-14 ב-21.2.23
SVT-60	Shivta	Tepper, Bar-Oz and Gini	Daniel Fuks	2016-2020	K	151	1625	3	חיטה/שעורה	Hordeum/Triticum	גרגיר	grain	דגניים	Gramineae			11	11	2		היה 6LF+7HF. תוקן ל-11 בסך הכל ב-21.2.23
SVT-60	Shivta	Tepper, Bar-Oz and Gini	Daniel Fuks	2016-2020	K	151	1625	4	גפן	Vitis vinifera	חרצן	pip	גפניים	Vitaceae	113	30	143	143	2		לא ספרתי מחדש ב-21.2.23
SVT-60	Shivta	Tepper, Bar-Oz and Gini	Daniel Fuks	2016-2020	K	151	1625	5	גפן	Vitis vinifera	צימוק	pericarp	גפניים	Vitaceae	8		8	8	2		מוסיף עוד 10 חרצנים
SVT-60	Shivta	Tepper, Bar-Oz and Gini	Daniel Fuks	2016-2020	K	151	1625	6	גפן	Vitis vinifera	שבר חרצן	pip fragment	גפניים	Vitaceae		11	11	11	2		LF+HF מוסיף עוד 11 לפיס= ספירת עוקצים
SVT-60	Shivta	Tepper, Bar-Oz and Gini	Daniel Fuks	2016-2020	K	151	1625	7	גפן	Vitis vinifera	זג	exocarp	גפניים	Vitaceae			0	0	2		LF+HF
SVT-60	Shivta	Tepper, Bar-Oz and Gini	Daniel Fuks	2016-2020	K	151	1625	8	גפן	Vitis vinifera	עוקץ	pedicel	גפניים	Vitaceae		3	3	3	2
SVT-60	Shivta	Tepper, Bar-Oz and Gini	Daniel Fuks	2016-2020	K	151	1625	9			שברי גרגיר	grain fragments	דגניים	Gramineae			0	0	2		LF+HF
SVT-60	Shivta	Tepper, Bar-Oz and Gini	Daniel Fuks	2016-2020	K	151	1625	10	תמר מצוי	Phoenix dactylifera	שבר גלעין	stone fragment	דקליים	Palmae			1	1	2		LF+HF
SVT-60	Shivta	Tepper, Bar-Oz and Gini	Daniel Fuks	2016-2020	K	151	1625	11	פרקי דגן		פרקי גבעול	culm node	דגניים	Gramineae	32	2	34	34	2
SVT-60	Shivta	Tepper, Bar-Oz and Gini	Daniel Fuks	2016-2020	K	151	1625	12	אמיך קוצני	Emex spinosa	פרי	fruit	ארכוביתיים	Polygonaceae		1	1	1	2
SVT-60	Shivta	Tepper, Bar-Oz and Gini	Daniel Fuks	2016-2020	K	151	1625	13	פיקוס התאנה	Ficus carica	אגוזית	nutlet	תותיים	Moraceae		1	1	1	2		יואל הוציא אגוזית מתוך ציפה/גלל
SVT-60	Shivta	Tepper, Bar-Oz and Gini	Daniel Fuks	2016-2020	K	151	1625	14	Salsoleae	Salsoleae	פרקי גבעול	stem segments	סלקיים	Chenopodiaceae		1	1	1	2
SVT-60	Shivta	Tepper, Bar-Oz and Gini	Daniel Fuks	2016-2020	K	151	1625	15			גלומה	glume	דגניים	Gramineae	1	1	2	2	2		LF-נראה כמוץ
SVT-60	Shivta	Tepper, Bar-Oz and Gini	Daniel Fuks	2016-2020	K	151	1625	16	גפן	Vitis vinifera	צימוק	pericarp	גפניים	Vitaceae	7		7	7	2
SVT-60	Shivta	Tepper, Bar-Oz and Gini	Daniel Fuks	2016-2020	K	151	1625	17	בלתי						2		2	2	2		דומה לצימוקים אך מוארכים וללא בסיס ברור או קיפולים
SVT-60	Shivta	Tepper, Bar-Oz and Gini	Daniel Fuks	2016-2020	K	151	1625	18	שעורה שש-טורית	Hordeum vulgare hexastichum	פרק ציר שיבולת	rachis fragment	דגניים	Gramineae	1		1	1	2		2segments on one fragmentLF+HF
SVT-60	Shivta	Tepper, Bar-Oz and Gini	Daniel Fuks	2016-2020	K	151	1625	19	חיטה טטרפלוידית	Triticum turgidum s.l.	פרק ציר שיבולת	rachis fragment	דגניים	Gramineae	3		3	3	2		1piece with 3segments, 1 with 2segments, 1 with 1 segment, LF+HF
SVT-60	Shivta	Tepper, Bar-Oz and Gini	Daniel Fuks	2016-2020	K	151	1625	20	חיטה/שעורה	Triticum/Hordeum	פרק ציר שיבולת	rachis fragment	דגניים	Gramineae	1		1	1	2		LF+HF
SVT-60	Shivta	Tepper, Bar-Oz and Gini	Daniel Fuks	2016-2020	K	151	1625	21	בלתי		גבעולים				0		0	0	2
SVT-60	Shivta	Tepper, Bar-Oz and Gini	Daniel Fuks	2016-2020	K	151	1625	22	בקיית הכרשינה	Vicia ervilia	פסיגים	cotyledon	פרפרניים	Fabaceae	5		1	1	2		רק פסיג אחד ברור מתוך 5
SVT-60	Shivta	Tepper, Bar-Oz and Gini	Daniel Fuks	2016-2020	K	151	1625	23	בלתי		?בצלצול				1		1	1	2		יש דגם שאפשר, ב-SEM
SVT-60	Shivta	Tepper, Bar-Oz and Gini	Daniel Fuks	2016-2020	K	151	1625	24	חיפושית להגדרה						1		1	1	2
SVT-60	Shivta	Tepper, Bar-Oz and Gini	Daniel Fuks	2016-2020	K	151	1625	25	ציפורני החתול	Calendula sp.	זרעון	achene	מורכבים	Asteraceae	1		1	1	2
SVT-60	Shivta	Tepper, Bar-Oz and Gini	Daniel Fuks	2016-2020	K	151	1625	26	רימון מצוי	Punica granatum	זרע	seed	רימוניים	Lythraceae	1		1	1	2		כתרון נפסל - קצוות מעוגלות,ועוד. רואים מין "הילום" בזרע שלי שמתאים לרימון. צורה וגודל גם
SVT-60	Shivta	Tepper, Bar-Oz and Gini	Daniel Fuks	2016-2020	K	151	1625	27	תמר מצוי	Phoenix dactylifera	שבר גלעין	stone fragment	דקליים	Palmae	1		1	1	2		?דגני
SVT-60	Shivta	Tepper, Bar-Oz and Gini	Daniel Fuks	2016-2020	K	151	1625	28	עולש?						2		2	2	2		לבדוק בKERNELS
SVT-60	Shivta	Tepper, Bar-Oz and Gini	Daniel Fuks	2016-2020	K	151	1625	29	בלתי		קרקפת	head	מורכבים	Asteraceae	1		1	1	2		לרפרף על מורכבים במהירות
SVT-60	Shivta	Tepper, Bar-Oz and Gini	Daniel Fuks	2016-2020	K	151	1625	30	בלתי-שונות						1		1	1	2
SVT-60	Shivta	Tepper, Bar-Oz and Gini	Daniel Fuks	2016-2020	K	151	1625	31	קשקשים(דג)						3		3	3	2		LF+HF
SVT-60	Shivta	Tepper, Bar-Oz and Gini	Daniel Fuks	2016-2020	K	151	1625	32	שונות		פרודת חלמית, אהל,ומאין גלל				1		1	1	2		רצנטי?
SVT-60	Shivta	Tepper, Bar-Oz and Gini	Daniel Fuks	2016-2020	K	151	1625	33	גללים		צאן-מפוחם						0	0	2
SVT-60	Shivta	Tepper, Bar-Oz and Gini	Daniel Fuks	2016-2020	K	151	1625	34	גלל עם אגוזית תאנה cf.		גלל עם אגוזית תאנה cf.				1		1	1	2		לחכות לזרעים הקטנים
SVT-60	Shivta	Tepper, Bar-Oz and Gini	Daniel Fuks	2016-2020	K	151	1625	35	בלתי - אולי תאנה		אגוזיות מתוך הגלל הנ"ל	nutlets removed from 60-34	cf. תותיים	cf. Moraceae	2		2	2	2		יואל: לא נראה תאנה/שרמה. השווה לעיל 60-13
SVT-60	Shivta	Tepper, Bar-Oz and Gini	Daniel Fuks	2016-2020	K	151	1625	36	שעורה שש-טורית	Hordeum vulgare hexastichum	גרגיר	grain	דגניים	Gramineae	1		1	1	1
SVT-60	Shivta	Tepper, Bar-Oz and Gini	Daniel Fuks	2016-2020	K	151	1625	37	?חיטה	Triticum	גרגיר	grain	דגניים	Gramineae	6		6	6	1
SVT-60	Shivta	Tepper, Bar-Oz and Gini	Daniel Fuks	2016-2020	K	151	1625	38	?חיטה/שעורה	?Hordeum/Triticum	גרגיר	grain	דגניים	Gramineae	6		6	6	1		זון? עוד?
SVT-60	Shivta	Tepper, Bar-Oz and Gini	Daniel Fuks	2016-2020	K	151	1625	39	גפן	Vitis vinifera	שבר חרצן	pip fragment	גפניים	Vitaceae	11		11	11	1		שברים, MNI=11
SVT-60	Shivta	Tepper, Bar-Oz and Gini	Daniel Fuks	2016-2020	K	151	1625	40	גפן	Vitis vinifera	זג	exocarp	גפניים	Vitaceae					1
SVT-60	Shivta	Tepper, Bar-Oz and Gini	Daniel Fuks	2016-2020	K	151	1625	41	גפן	Vitis vinifera	עוקץ	pedicel	גפניים	Vitaceae	24		24	24	1
SVT-60	Shivta	Tepper, Bar-Oz and Gini	Daniel Fuks	2016-2020	K	151	1625	42	גפן	Vitis vinifera	צימוק	pericarp	גפניים	Vitaceae	4		4	4	1
SVT-60	Shivta	Tepper, Bar-Oz and Gini	Daniel Fuks	2016-2020	K	151	1625	43	גפן	Vitis vinifera	ענב לא מפותח	undeveloped grape	גפניים	Vitaceae	1		1	1	1		עוקץ צעיר
SVT-60	Shivta	Tepper, Bar-Oz and Gini	Daniel Fuks	2016-2020	K	151	1625	44	פרקי דגן		פרקי גבעול	culm node	דגניים	Gramineae	22		22	22	1
SVT-60	Shivta	Tepper, Bar-Oz and Gini	Daniel Fuks	2016-2020	K	151	1625	45	שעורת הבר/דו-טורית	Hordeum vulgare subsp. distichum/spontaneum	פרק ציר שיבולת	rachis fragment	דגניים	Gramineae	24		24	24	1
SVT-60	Shivta	Tepper, Bar-Oz and Gini	Daniel Fuks	2016-2020	K	151	1625	46	שעורה שש-טורית	Hordeum vulgare subsp. hexastichum	פרק ציר שיבולת	rachis fragment	דגניים	Gramineae	25		25	25	1
SVT-60	Shivta	Tepper, Bar-Oz and Gini	Daniel Fuks	2016-2020	K	151	1625	47	שעורה שש-טורית	Hordeum vulgare subsp. hexastichum	פרק ראשון	first rachis	דגניים	Gramineae	1		1	1	1		includes 3 segments
SVT-60	Shivta	Tepper, Bar-Oz and Gini	Daniel Fuks	2016-2020	K	151	1625	48	שעורה	Hordeum vulgare ssp.	פרק ציר שיבולת	rachis fragment	דגניים	Gramineae	30		30	30	1		כנראה הכל דו-טורית/בר includes 1 with 2 segments
SVT-60	Shivta	Tepper, Bar-Oz and Gini	Daniel Fuks	2016-2020	K	151	1625	49	חיטה טטרפלוידית	Triticum turgidum s.l.	פרק ציר שיבולת	rachis fragment	דגניים	Gramineae	39		39	39	1
SVT-60	Shivta	Tepper, Bar-Oz and Gini	Daniel Fuks	2016-2020	K	151	1625	50	חיטה/שעורה	Triticum aestivum s.l.	פרק ציר שיבולת	rachis fragment	דגניים	Gramineae	4		4	4	1		1 piece with 3 segments
SVT-60	Shivta	Tepper, Bar-Oz and Gini	Daniel Fuks	2016-2020	K	151	1625	51	חיטה	Triticum sp.	פרק ציר שיבולת	rachis fragment	דגניים	Gramineae	39		39	39	1
SVT-60	Shivta	Tepper, Bar-Oz and Gini	Daniel Fuks	2016-2020	K	151	1625	52	חיטה/שעורה	Triticum/Hordeum	פרק ציר שיבולת	rachis fragment	דגניים	Gramineae	40		40	40	1		and5 broken fragments
SVT-60	Shivta	Tepper, Bar-Oz and Gini	Daniel Fuks	2016-2020	K	151	1625	53			פרק ראשון	first rachis	דגניים	Gramineae	15		15	15	1
SVT-60	Shivta	Tepper, Bar-Oz and Gini	Daniel Fuks	2016-2020	K	151	1625	54	בלתי		פרק ציר שיבולת	rachis fragment	דגניים	Gramineae	1		1	1	1		השווה 81-96 - דגם, יציאה של הrachilla. יואל: לא להתעסק
SVT-60	Shivta	Tepper, Bar-Oz and Gini	Daniel Fuks	2016-2020	K	151	1625	55	זון אשון/משכר?	Lolium sp.	פרק ציר שיבולת	rachis fragment	דגניים	Gramineae	2		2	2	1
SVT-60	Shivta	Tepper, Bar-Oz and Gini	Daniel Fuks	2016-2020	K	151	1625	56	זון אשון	Lolium rigidum	גרגיר	grain	דגניים	Gramineae	4		4	4	1		מחברת 2 עמ' 65
SVT-60	Shivta	Tepper, Bar-Oz and Gini	Daniel Fuks	2016-2020	K	151	1625	57	עוקצר מצוי	Brachypodium distachyon	גרגיר	grain	דגניים	Gramineae	3		3	3	1
SVT-60	Shivta	Tepper, Bar-Oz and Gini	Daniel Fuks	2016-2020	K	151	1625	58	יבלית מצויה	Cynodon dactylon	גרגיר בגלל	grain in dung	דגניים	Gramineae	1		1	1	1
SVT-60	Shivta	Tepper, Bar-Oz and Gini	Daniel Fuks	2016-2020	K	151	1625	59	דגני בלתי		גרגיר	grain	דגניים	Gramineae	1		1	1	1		לא להתעסק
SVT-60	Shivta	Tepper, Bar-Oz and Gini	Daniel Fuks	2016-2020	K	151	1625	60					דגניים?	Gramineae?	2		2	2	1
SVT-60	Shivta	Tepper, Bar-Oz and Gini	Daniel Fuks	2016-2020	K	151	1625	61	?גפן	Vitis vinifera??	ענף/עוקץ	branch/pedicel	גפניים	Vitaceae	1		1	1	1
SVT-60	Shivta	Tepper, Bar-Oz and Gini	Daniel Fuks	2016-2020	K	151	1625	62	?גפן	Vitis vinifera??	צלקת?	stigma?	גפניים?	Vitaceae?	2		2	2	1
SVT-60	Shivta	Tepper, Bar-Oz and Gini	Daniel Fuks	2016-2020	K	151	1625	63	זנב-עקרב שיכני	Scorpiurus muricatus	זרע	seed	פרפרניים	Fabaceae	8		8	8	1
SVT-60	Shivta	Tepper, Bar-Oz and Gini	Daniel Fuks	2016-2020	K	151	1625	64	כתרון גלוני?	Coronilla repanda?	זרע	seed	פרפרניים	Fabaceae	2		2	2	1
SVT-60	Shivta	Tepper, Bar-Oz and Gini	Daniel Fuks	2016-2020	K	151	1625	65	/גרגרנית/תלתן		זרע	seed	פרפרניים	Fabaceae	3		3	3	1
SVT-60	Shivta	Tepper, Bar-Oz and Gini	Daniel Fuks	2016-2020	K	151	1625	66	גרגרנית ערבית/ cf. מדברית	Trigonella arabica/schlumbergeri	זרע	seed	פרפרניים	Fabaceae	1		1	1	1
SVT-60	Shivta	Tepper, Bar-Oz and Gini	Daniel Fuks	2016-2020	K	151	1625	67	עירית צרת-עלים/נבובה	Asphodelus tenuifolius/fistulosus	זרע	seed	שושניים	Liliaceae	4		4	4	1		יותר בכיוון צרת-עלים לפי המידות. ראה מח' 2 עמ' 70-69
SVT-60	Shivta	Tepper, Bar-Oz and Gini	Daniel Fuks	2016-2020	K	151	1625	68	צלע השור חרוזה	Bupleurum lancifolium	זרע	seed	סוככיים	Umbelliferae	1		1	1	1
SVT-60	Shivta	Tepper, Bar-Oz and Gini	Daniel Fuks	2016-2020	K	151	1625	69	דרדר	Centaurea	זרעון	achene	מורכבים	Asteraceae	1		1	1	1		מחברת 2 עמ' 72
SVT-60	Shivta	Tepper, Bar-Oz and Gini	Daniel Fuks	2016-2020	K	151	1625	70	חלמית	Malva sp.	זרע	seed	חלמיתיים	Malvaceae	4		4	4	1		מחברת 2 עמ' 73
SVT-60	Shivta	Tepper, Bar-Oz and Gini	Daniel Fuks	2016-2020	K	151	1625	71	אשל היאור s.l.						2		2	2	1		אחד לא מפוחם check enveleopes
SVT-60	Shivta	Tepper, Bar-Oz and Gini	Daniel Fuks	2016-2020	K	151	1625	72	אשל?						3		3	3	1
SVT-60	Shivta	Tepper, Bar-Oz and Gini	Daniel Fuks	2016-2020	K	151	1625	73	בלתי		בסיס זרעון?	achene base?	מורכבים?	Asteraceae?	1		1	1	1
SVT-60	Shivta	Tepper, Bar-Oz and Gini	Daniel Fuks	2016-2020	K	151	1625	74	אשליל שעיר?	Reaumuria hirtella ?							0	0	1
SVT-60	Shivta	Tepper, Bar-Oz and Gini	Daniel Fuks	2016-2020	K	151	1625	75	Salsoleae	Salsoleae	ניצן	bud	סלקיים	Chenopodiaceae	1		1	1	1
SVT-60	Shivta	Tepper, Bar-Oz and Gini	Daniel Fuks	2016-2020	K	151	1625	76	Salsoleae	Salsoleae	פרקי גבעול	stem segments	סלקיים	Chenopodiaceae	2		2	2	1
SVT-60	Shivta	Tepper, Bar-Oz and Gini	Daniel Fuks	2016-2020	K	151	1625	77	מתנן שעיר	Thymelaea hirsuta	עלה	leaf	מתנניים	Thymelaeaceae	95		95	95	1
SVT-60	Shivta	Tepper, Bar-Oz and Gini	Daniel Fuks	2016-2020	K	151	1625	78	מתנן שעיר	Thymelaea hirsuta	אגוזית	nutlet	מתנניים	Thymelaeaceae	14		14	14	1		3-2 לוודא
SVT-60	Shivta	Tepper, Bar-Oz and Gini	Daniel Fuks	2016-2020	K	151	1625	79	מתנן שעיר	Thymelaea hirsuta	ניצן	bud	מתנניים	Thymelaeaceae	7		7	7	1
SVT-60	Shivta	Tepper, Bar-Oz and Gini	Daniel Fuks	2016-2020	K	151	1625	80	בלתי		ניצן	bud			9		9	9	1		להשוות ל-74, אשליל?
SVT-60	Shivta	Tepper, Bar-Oz and Gini	Daniel Fuks	2016-2020	K	151	1625	81	עכנאי שרוע	Echium angustifolium	זרע	seed	זיפניים	Boraginaceae	1		1	1	1
SVT-60	Shivta	Tepper, Bar-Oz and Gini	Daniel Fuks	2016-2020	K	151	1625	82	ארנבית שרועה	Arnebia decumbens	זרע	seed	זיפניים	Boraginaceae	2		2	2	1
SVT-60	Shivta	Tepper, Bar-Oz and Gini	Daniel Fuks	2016-2020	K	151	1625	83	גלעינית זעירת פרחים	Buglossoides tenuiflora	זרע	seed	זיפניים	Boraginaceae	2		2	2	1
SVT-60	Shivta	Tepper, Bar-Oz and Gini	Daniel Fuks	2016-2020	K	151	1625	84	אמיך קוצני	Emex spinosa	פרי על גבעול		ארכוביתיים	Polygonaceae	1		1	1	1
SVT-60	Shivta	Tepper, Bar-Oz and Gini	Daniel Fuks	2016-2020	K	151	1625	85	אמיך קוצני	Emex spinosa	זרע	seed	ארכוביתיים	Polygonaceae	1		1	1	1
SVT-60	Shivta	Tepper, Bar-Oz and Gini	Daniel Fuks	2016-2020	K	151	1625	86	עולש?						2		2	2	1
SVT-60	Shivta	Tepper, Bar-Oz and Gini	Daniel Fuks	2016-2020	K	151	1625	87	כף-אווז	Chenopodium sp.	זרע	seed	סלקיים	Chenopodiaceae	1		1	1	1		לא להגדיר
SVT-60	Shivta	Tepper, Bar-Oz and Gini	Daniel Fuks	2016-2020	K	151	1625	88	לחך	Plantago sp.	זרע	seed	לחכיים	Plantaginaceae	1		1	1	1
SVT-60	Shivta	Tepper, Bar-Oz and Gini	Daniel Fuks	2016-2020	K	151	1625	89	ציפורני החתול	Calendula sp.	זרעון	achene	מורכבים	Asteraceae	1		1	1	1
SVT-60	Shivta	Tepper, Bar-Oz and Gini	Daniel Fuks	2016-2020	K	151	1625	90	קחוון?		זרעון	achene	מורכבים	Asteraceae	1		1	1	1
SVT-60	Shivta	Tepper, Bar-Oz and Gini	Daniel Fuks	2016-2020	K	151	1625	91	פיקוס התאנה	Ficus carica	אגוזית	nutlet	תותיים	Moraceae	10		10	10	1
SVT-60	Shivta	Tepper, Bar-Oz and Gini	Daniel Fuks	2016-2020	K	151	1625	92	בלתי	זרעון מורכבים?							1	1	1		ניסנית ירושלמית?
SVT-60	Shivta	Tepper, Bar-Oz and Gini	Daniel Fuks	2016-2020	K	151	1625	93	גביע שפתני?						1		1	1	1
SVT-60	Shivta	Tepper, Bar-Oz and Gini	Daniel Fuks	2016-2020	K	151	1625	94	בלתי - דמוי חלמית						1		1	1	1
SVT-60	Shivta	Tepper, Bar-Oz and Gini	Daniel Fuks	2016-2020	K	151	1625	95	שונות ליואל								0	0	1
SVT-60	Shivta	Tepper, Bar-Oz and Gini	Daniel Fuks	2016-2020	K	151	1625	96			שברי מלען וגלומה	awn and glume fragments	דגניים	Gramineae			0	0	1
SVT-60	Shivta	Tepper, Bar-Oz and Gini	Daniel Fuks	2016-2020	K	151	1625	97	גלל								0	0	1
SVT-60	Shivta	Tepper, Bar-Oz and Gini	Daniel Fuks	2016-2020	K	151	1625	98	חיפושית להגדרה			head, thorax, abdomen					0	0	1
SVT-60	Shivta	Tepper, Bar-Oz and Gini	Daniel Fuks	2016-2020	K	151	1625	99	נמלה?		ראש	head					0	0	1
SVT-60	Shivta	Tepper, Bar-Oz and Gini	Daniel Fuks	2016-2020	K	151	1625	100	בלתי-שונות								0	0	1
SVT-60	Shivta	Tepper, Bar-Oz and Gini	Daniel Fuks	2016-2020	K	151	1625	101	בלתי		ענבה	berry			4		4	4	1		אולי צימוקי גפן
SVT-60	Shivta	Tepper, Bar-Oz and Gini	Daniel Fuks	2016-2020	K	151	1625	102	דגני להגדרה		גרגיר	grain	דגניים	Gramineae	1		1	1	1		נראה כשעורה
SVT-60	Shivta	Tepper, Bar-Oz and Gini	Daniel Fuks	2016-2020	K	151	1625	103	גלל עם אגוזית תאנה cf.		גלל עם אגוזית תאנה cf.						0	0	2		מתחבר ל-60-13
SVT-60	Shivta	Tepper, Bar-Oz and Gini	Daniel Fuks	2016-2020	K	151	1625	104	דגני				דגניים	Graminae			2	2	0.5		להגדרה
SVT-60	Shivta	Tepper, Bar-Oz and Gini	Daniel Fuks	2016-2020	K	151	1625	105	חפורית?								3	3	0.5
SVT-60	Shivta	Tepper, Bar-Oz and Gini	Daniel Fuks	2016-2020	K	151	1625	106	יבלית מצויה	Cynodon dactylon							51	51	0.5
SVT-60	Shivta	Tepper, Bar-Oz and Gini	Daniel Fuks	2016-2020	K	151	1625	107	שעורה דו-טורית			rachis?	דגניים	Graminae			2	2	0.5
SVT-60	Shivta	Tepper, Bar-Oz and Gini	Daniel Fuks	2016-2020	K	151	1625	108	שעורה שש-טורית				דגניים	Graminae			4	4	0.5
SVT-60	Shivta	Tepper, Bar-Oz and Gini	Daniel Fuks	2016-2020	K	151	1625	109	חיטה 4x		פרק ציר שיבולת						3	3	0.5
SVT-60	Shivta	Tepper, Bar-Oz and Gini	Daniel Fuks	2016-2020	K	151	1625	110	חיטה שש-טורית				דגניים	Graminae			1	1	0.5
SVT-60	Shivta	Tepper, Bar-Oz and Gini	Daniel Fuks	2016-2020	K	151	1625	111	חיטה	Triticum			דגניים	Graminae			2	2	0.5
SVT-60	Shivta	Tepper, Bar-Oz and Gini	Daniel Fuks	2016-2020	K	151	1625	112	חיטה/שעורה	Hordeum/Triticum	פרק ציר שיבולת		דגניים	Graminae			10	10+	0.5
SVT-60	Shivta	Tepper, Bar-Oz and Gini	Daniel Fuks	2016-2020	K	151	1625	113	חלקי שדרה								12	12	0.5
SVT-60	Shivta	Tepper, Bar-Oz and Gini	Daniel Fuks	2016-2020	K	151	1625	114	בסיס ציר שיבולת								1	1	0.5
SVT-60	Shivta	Tepper, Bar-Oz and Gini	Daniel Fuks	2016-2020	K	151	1625	115	קוטנדיה								1	1	0.5
SVT-60	Shivta	Tepper, Bar-Oz and Gini	Daniel Fuks	2016-2020	K	151	1625	116	שברי מלען -?										0.5
SVT-60	Shivta	Tepper, Bar-Oz and Gini	Daniel Fuks	2016-2020	K	151	1625	117	חלקי דגני				דגניים	Graminae			11	11	0.5
SVT-60	Shivta	Tepper, Bar-Oz and Gini	Daniel Fuks	2016-2020	K	151	1625	118	מלען - מלעניאל/מקור חסידה								1	1	0.5
SVT-60	Shivta	Tepper, Bar-Oz and Gini	Daniel Fuks	2016-2020	K	151	1625	119	גפן	Vitis vinifera	עוקץ	peel	גפניים	Vitacae			2	2	0.5
SVT-60	Shivta	Tepper, Bar-Oz and Gini	Daniel Fuks	2016-2020	K	151	1625	120	גפן	Vitis vinifera	שברי חרצן		גפניים	Vitacae					0.5		?
SVT-60	Shivta	Tepper, Bar-Oz and Gini	Daniel Fuks	2016-2020	K	151	1625	121	צלקת?								3	3	0.5
SVT-60	Shivta	Tepper, Bar-Oz and Gini	Daniel Fuks	2016-2020	K	151	1625	122	גפן - מיואל	Vitis vinifera	פרח?		גפניים	Vitacae			3	3	0.5
SVT-60	Shivta	Tepper, Bar-Oz and Gini	Daniel Fuks	2016-2020	K	151	1625	123	פיקוס התאנה	Ficus carica	שברי אגוזית						20	20	0.5
SVT-60	Shivta	Tepper, Bar-Oz and Gini	Daniel Fuks	2016-2020	K	151	1625	124	חלמית	Malva sp.							1	1	0.5
SVT-60	Shivta	Tepper, Bar-Oz and Gini	Daniel Fuks	2016-2020	K	151	1625	125	ארנבית שרועה?	Arnebia decumbens							1	1	0.5
SVT-60	Shivta	Tepper, Bar-Oz and Gini	Daniel Fuks	2016-2020	K	151	1625	126	כף-אווז	Chenopodium sp.							3	3	0.5		האשפות?
SVT-60	Shivta	Tepper, Bar-Oz and Gini	Daniel Fuks	2016-2020	K	151	1625	127	ששן מאפיר?	Caylusea hexagyna?							1	1	0.5
SVT-60	Shivta	Tepper, Bar-Oz and Gini	Daniel Fuks	2016-2020	K	151	1625	128	אוכם?	Suaeda?							1	1	0.5
SVT-60	Shivta	Tepper, Bar-Oz and Gini	Daniel Fuks	2016-2020	K	151	1625	129	אהל מצוי	Mesembryanthemum nodiflorum							11	11	0.5
SVT-60	Shivta	Tepper, Bar-Oz and Gini	Daniel Fuks	2016-2020	K	151	1625	130	חיעך ספרדי	Aizoon hispanicum							22	22	0.5
SVT-60	Shivta	Tepper, Bar-Oz and Gini	Daniel Fuks	2016-2020	K	151	1625	131	מרגנית	Anagallis arvensis							12	12	0.5
SVT-60	Shivta	Tepper, Bar-Oz and Gini	Daniel Fuks	2016-2020	K	151	1625	132	ציפרנית	Silene sp.							3	3	0.5
SVT-60	Shivta	Tepper, Bar-Oz and Gini	Daniel Fuks	2016-2020	K	151	1625	133	לחך	Plantago sp.							8	8	0.5
SVT-60	Shivta	Tepper, Bar-Oz and Gini	Daniel Fuks	2016-2020	K	151	1625	134	מתחבר לדבקה?								1	1	0.5
SVT-60	Shivta	Tepper, Bar-Oz and Gini	Daniel Fuks	2016-2020	K	151	1625	135	חרצית?	Glebionis?							1	1	0.5
SVT-60	Shivta	Tepper, Bar-Oz and Gini	Daniel Fuks	2016-2020	K	151	1625	136	קחוון?	Anthemis?							13	13	0.5
SVT-60	Shivta	Tepper, Bar-Oz and Gini	Daniel Fuks	2016-2020	K	151	1625	137	קחוון??/לענה?/אשל?								4	4	0.5
SVT-60	Shivta	Tepper, Bar-Oz and Gini	Daniel Fuks	2016-2020	K	151	1625	138	לענה?/ אשל?								11	11	0.5
SVT-60	Shivta	Tepper, Bar-Oz and Gini	Daniel Fuks	2016-2020	K	151	1625	139	ארכובית?								1	1	0.5
SVT-60	Shivta	Tepper, Bar-Oz and Gini	Daniel Fuks	2016-2020	K	151	1625	140	אשליל? יואל								18	18	0.5
SVT-60	Shivta	Tepper, Bar-Oz and Gini	Daniel Fuks	2016-2020	K	151	1625	141	אשל הפרקים	Tamarix aphylla							17	17	0.5
SVT-60	Shivta	Tepper, Bar-Oz and Gini	Daniel Fuks	2016-2020	K	151	1625	142	אשל היאור s.l.	Tamarix nilotica s.l.							5	5	0.5
SVT-60	Shivta	Tepper, Bar-Oz and Gini	Daniel Fuks	2016-2020	K	151	1625	143	אשל?		קליפת גזע						4	4	0.5
SVT-60	Shivta	Tepper, Bar-Oz and Gini	Daniel Fuks	2016-2020	K	151	1625	144	מתנן שעיר								2	2	0.5
SVT-60	Shivta	Tepper, Bar-Oz and Gini	Daniel Fuks	2016-2020	K	151	1625	145	מתנן		עלה	leaf					35	35	0.5		first ml of light fraction
SVT-60	Shivta	Tepper, Bar-Oz and Gini	Daniel Fuks	2016-2020	K	151	1625	146	מתנן שעיר								34	34	0.5
SVT-60	Shivta	Tepper, Bar-Oz and Gini	Daniel Fuks	2016-2020	K	151	1625	147	מתנן שעיר		פרחים						9	9	0.5
SVT-60	Shivta	Tepper, Bar-Oz and Gini	Daniel Fuks	2016-2020	K	151	1625	148	גביע/ פרח								2	2	0.5
SVT-60	Shivta	Tepper, Bar-Oz and Gini	Daniel Fuks	2016-2020	K	151	1625	149	פרחים?								3	3	0.5
SVT-60	Shivta	Tepper, Bar-Oz and Gini	Daniel Fuks	2016-2020	K	151	1625	150	בלתי		ניצן						1	1	0.5
SVT-60	Shivta	Tepper, Bar-Oz and Gini	Daniel Fuks	2016-2020	K	151	1625	151	פרפרני תלתן								5	5	0.5
SVT-60	Shivta	Tepper, Bar-Oz and Gini	Daniel Fuks	2016-2020	K	151	1625	152	תלתן								4	4	0.5
SVT-60	Shivta	Tepper, Bar-Oz and Gini	Daniel Fuks	2016-2020	K	151	1625	153	ליואל - שפ?/קרתן?								1	1	0.5
SVT-60	Shivta	Tepper, Bar-Oz and Gini	Daniel Fuks	2016-2020	K	151	1625	154	אספסת?								1	1	0.5
SVT-60	Shivta	Tepper, Bar-Oz and Gini	Daniel Fuks	2016-2020	K	151	1625	155	קדד/גרגרנית								1	1	0.5
SVT-60	Shivta	Tepper, Bar-Oz and Gini	Daniel Fuks	2016-2020	K	151	1625	156	בלתי								6	6	0.5		במוי? כף אווז
SVT-60	Shivta	Tepper, Bar-Oz and Gini	Daniel Fuks	2016-2020	K	151	1625	157											0.5
SVT-60	Shivta	Tepper, Bar-Oz and Gini	Daniel Fuks	2016-2020	K	151	1625	158											0.5
SVT-60	Shivta	Tepper, Bar-Oz and Gini	Daniel Fuks	2016-2020	K	151	1625	159											0.5
SVT-60	Shivta	Tepper, Bar-Oz and Gini	Daniel Fuks	2016-2020	K	151	1625	160											0.5
SVT-60	Shivta	Tepper, Bar-Oz and Gini	Daniel Fuks	2016-2020	K	151	1625	161											0.5
SVT-61	Shivta	Tepper, Bar-Oz and Gini	Daniel Fuks	2016-2020	K	152	1509	1	שעורה תרבותית	Hordeum vulgare	גרגיר	grain	דגניים	Gramineae	27		27	27	2
SVT-61	Shivta	Tepper, Bar-Oz and Gini	Daniel Fuks	2016-2020	K	152	1509	2	חיטה	Triticum sp.	גרגיר	grain	דגניים	Gramineae	33		33	33	2
SVT-61	Shivta	Tepper, Bar-Oz and Gini	Daniel Fuks	2016-2020	K	152	1509	3	חיטה/שעורה	Hordeum/Triticum	גרגיר	grain	דגניים	Gramineae	9		9	9	2
SVT-61	Shivta	Tepper, Bar-Oz and Gini	Daniel Fuks	2016-2020	K	152	1509	4	דגני						1		1	1	2
SVT-61	Shivta	Tepper, Bar-Oz and Gini	Daniel Fuks	2016-2020	K	152	1509	5	אמיך קוצני	Emex spinosa	פרי	fruit	ארכוביתיים	Polygonaceae	1		1	1	2		רצנטי?
SVT-61	Shivta	Tepper, Bar-Oz and Gini	Daniel Fuks	2016-2020	K	152	1509	6	זית אירופאי	Olea europaea	שבר גלעין		זיתיים	Oleaceae		1	1	1	2
SVT-61	Shivta	Tepper, Bar-Oz and Gini	Daniel Fuks	2016-2020	K	152	1509	7	שונות								0	0	2		רצנטי
SVT-62	Shivta	Tepper, Bar-Oz and Gini	Daniel Fuks	2016-2020	K	153	1513	1	שעורה תרבותית	Hordeum vulgare	גרגיר	grain	דגניים	Gramineae	25	3	28	28	2
SVT-62	Shivta	Tepper, Bar-Oz and Gini	Daniel Fuks	2016-2020	K	153	1513	2	חיטה	Triticum sp.	גרגיר	grain	דגניים	Gramineae	19	1	20	20	2
SVT-62	Shivta	Tepper, Bar-Oz and Gini	Daniel Fuks	2016-2020	K	153	1513	3	חיטה/שעורה	Hordeum/Triticum	גרגיר	grain	דגניים	Gramineae	4	6	10	10	2
SVT-62	Shivta	Tepper, Bar-Oz and Gini	Daniel Fuks	2016-2020	K	153	1513	4	גפן	Vitis vinifera	חרצן	pip	גפניים	Vitaceae	2	2	4	4	2
SVT-62	Shivta	Tepper, Bar-Oz and Gini	Daniel Fuks	2016-2020	K	153	1513	5	חלקי שדרה		פרק ציר שיבולת	rachis fragment	דגניים	Gramineae	3		3	3	2
SVT-62	Shivta	Tepper, Bar-Oz and Gini	Daniel Fuks	2016-2020	K	153	1513	6	פרקי דגן						11		11	11	2
SVT-62	Shivta	Tepper, Bar-Oz and Gini	Daniel Fuks	2016-2020	K	153	1513	7	יפרוק המדבר	Salsoleae					1		1	1	2
SVT-62	Shivta	Tepper, Bar-Oz and Gini	Daniel Fuks	2016-2020	K	153	1513	8	רימון מצוי	Punica granatum	זרע	seed	רימוניים	Lythraceae	3		3	3	2
SVT-62	Shivta	Tepper, Bar-Oz and Gini	Daniel Fuks	2016-2020	K	153	1513	9	רימון מצוי	Punica granatum	קליפה	rind	רימוניים	Lythraceae	1		1	1	2
SVT-62	Shivta	Tepper, Bar-Oz and Gini	Daniel Fuks	2016-2020	K	153	1513	10	גפן	Vitis vinifera	ענב צעיר/צימוק	pericarp	גפניים	Vitaceae	1		1	1	2		השווה SVT-70-5
SVT-62	Shivta	Tepper, Bar-Oz and Gini	Daniel Fuks	2016-2020	K	153	1513	11	תרמיל						1		1	1	2
SVT-62	Shivta	Tepper, Bar-Oz and Gini	Daniel Fuks	2016-2020	K	153	1513	12	חרק						1		1	1	2		נראה קדום
SVT-62	Shivta	Tepper, Bar-Oz and Gini	Daniel Fuks	2016-2020	K	153	1513	13	אלה אטלנטית	Pistacia atlantica	זרע	seed	אלתיים	Anacardiaceae	1		1	1	2
SVT-62	Shivta	Tepper, Bar-Oz and Gini	Daniel Fuks	2016-2020	K	153	1513	14	בלתי						1		1	1	2
SVT-62	Shivta	Tepper, Bar-Oz and Gini	Daniel Fuks	2016-2020	K	153	1513	15	לזיהוי						1		1	1	2
SVT-62	Shivta	Tepper, Bar-Oz and Gini	Daniel Fuks	2016-2020	K	153	1513	16	בלתי		אולי דלועי				1		1	1	2
SVT-62	Shivta	Tepper, Bar-Oz and Gini	Daniel Fuks	2016-2020	K	153	1513	17	חרוב מצוי	Ceratonia siliqua			כליליים	Caesalpiniaceae	1		1	1	2
SVT-62	Shivta	Tepper, Bar-Oz and Gini	Daniel Fuks	2016-2020	K	153	1513	18	בקיית הכרישנה	Vicia ervilia					1		1	1	2
SVT-62	Shivta	Tepper, Bar-Oz and Gini	Daniel Fuks	2016-2020	K	153	1513	19	אבטיח הפקועות	Citrullus colocynthis					1		1	1	2
SVT-62	Shivta	Tepper, Bar-Oz and Gini	Daniel Fuks	2016-2020	K	153	1513	20	גפן	Vitis vinifera	עוקץ	pedicel	גפניים	Vitaceae	1		1	1	2
SVT-62	Shivta	Tepper, Bar-Oz and Gini	Daniel Fuks	2016-2020	K	153	1513	21	?אספסת						1		1	1	2
SVT-62	Shivta	Tepper, Bar-Oz and Gini	Daniel Fuks	2016-2020	K	153	1513	22	עדשה						1		1	1	2		מפוחם
SVT-62	Shivta	Tepper, Bar-Oz and Gini	Daniel Fuks	2016-2020	K	153	1513	23	אמיך קוצני	Emex spinosa	פרי	fruit	ארכוביתיים	Polygonaceae	1		1	1	2
SVT-62	Shivta	Tepper, Bar-Oz and Gini	Daniel Fuks	2016-2020	K	153	1513	24	אמיך קוצני	Emex spinosa	פרי	fruit	ארכוביתיים	Polygonaceae	9		9	9	2
SVT-62	Shivta	Tepper, Bar-Oz and Gini	Daniel Fuks	2016-2020	K	153	1513	25	חלמית-רצנטי								0	0	2
SVT-62	Shivta	Tepper, Bar-Oz and Gini	Daniel Fuks	2016-2020	K	153	1513	26	בלתי								0	0	2		צריך לחשוב
SVT-62	Shivta	Tepper, Bar-Oz and Gini	Daniel Fuks	2016-2020	K	153	1513	27	גללים						1		1	1	2
SVT-62	Shivta	Tepper, Bar-Oz and Gini	Daniel Fuks	2016-2020	K	153	1513	28	בלתי								0	0	2
SVT-62	Shivta	Tepper, Bar-Oz and Gini	Daniel Fuks	2016-2020	K	153	1513	29	קטנית להגדרה: בקיה א"י?	Legume for ID	זרע	seed	פרפרניים	Fabaceae		1	1	1	2		אני: טופח ספרדי. יואל: לא, אולי בקיה א"י בזכות טבורית ארוכה יותר מבקיה תרבותית, זרע כדורי פחוס, עדשה גדולה ורחוקה מהטבורית			השווה: 62-29, 67-19, 87-44, 91-152
SVT-62	Shivta	Tepper, Bar-Oz and Gini	Daniel Fuks	2016-2020	K	153	1513	30	בקיית הכרישנה		פסיג וזרע	seed and cotyledon	פרפרניים	Fabaceae		2	2	2	2
SVT-62	Shivta	Tepper, Bar-Oz and Gini	Daniel Fuks	2016-2020	K	153	1513	31	תמר מצוי	Phoenix dactylifera	גלעין	stone fragment	דקליים	Palmae		1	1	1	2
SVT-62	Shivta	Tepper, Bar-Oz and Gini	Daniel Fuks	2016-2020	K	153	1513	32	חרק							3	3	3	2		רצנטי?
SVT-63	Shivta	Tepper, Bar-Oz and Gini	Daniel Fuks	2016-2020	K	153	1513	5	חלקי שדרה						2		2	2	2
SVT-63	Shivta	Tepper, Bar-Oz and Gini	Daniel Fuks	2016-2020	K	153	1513	6	שעורה שש-טורית	Hordeum vulgare subsp. hexastichum	פרק ציר שיבולת	rachis	דגניים	Gramineae	1		1	1	2		3 פרקים מחוברים
SVT-63	Shivta	Tepper, Bar-Oz and Gini	Daniel Fuks	2016-2020	K	153	1513	7	פרקי דגן						20		20	20	2
SVT-63	Shivta	Tepper, Bar-Oz and Gini	Daniel Fuks	2016-2020	K	153	1513	8	כרשינה	Vicia ervilia					8		8	8	2
SVT-63	Shivta	Tepper, Bar-Oz and Gini	Daniel Fuks	2016-2020	K	153	1513	9	cf. כרשינה	cf. Vicia ervilia	פסיגים	cotyledon	פרפרניים	Fabaceae	3		3	3	2
SVT-63	Shivta	Tepper, Bar-Oz and Gini	Daniel Fuks	2016-2020	K	153	1513	10	גפן	Vitis vinifera	זג	exocarp	גפניים	Vitaceae					2
SVT-63	Shivta	Tepper, Bar-Oz and Gini	Daniel Fuks	2016-2020	K	153	1513	11	שקד מצוי	Prunus amygdala	קליפה חיצונית		ורדיים	Rosaceae	1		1	1	2
SVT-63	Shivta	Tepper, Bar-Oz and Gini	Daniel Fuks	2016-2020	K	153	1513	12	?מתנן שעיר						1		1	1	2
SVT-63	Shivta	Tepper, Bar-Oz and Gini	Daniel Fuks	2016-2020	K	153	1513	13	?מתנן						1		1	1	2		לבדוק
SVT-63	Shivta	Tepper, Bar-Oz and Gini	Daniel Fuks	2016-2020	K	153	1513	14	?אשל הפרקים								0	0	2
SVT-63	Shivta	Tepper, Bar-Oz and Gini	Daniel Fuks	2016-2020	K	153	1513	15	?יפרוק						1		1	1	2
SVT-63	Shivta	Tepper, Bar-Oz and Gini	Daniel Fuks	2016-2020	K	153	1513	16	?יפרוק								0	0	2		מפוחם
SVT-63	Shivta	Tepper, Bar-Oz and Gini	Daniel Fuks	2016-2020	K	153	1513	17	חרק		רגל						0	0	2		לבדוק
SVT-63	Shivta	Tepper, Bar-Oz and Gini	Daniel Fuks	2016-2020	K	153	1513	18	?נמלה		ראש						0	0	2		לצלם על הצד
SVT-63	Shivta	Tepper, Bar-Oz and Gini	Daniel Fuks	2016-2020	K	153	1513	19	?חפורית						1		1	1	2
SVT-63	Shivta	Tepper, Bar-Oz and Gini	Daniel Fuks	2016-2020	K	153	1513	20	?פטריה						1		1	1	2
SVT-63	Shivta	Tepper, Bar-Oz and Gini	Daniel Fuks	2016-2020	K	153	1513	21	?מלען או רגל חרק								0	0	2
SVT-63	Shivta	Tepper, Bar-Oz and Gini	Daniel Fuks	2016-2020	K	153	1513	22	מורכבים		זרעון						0	0	2
SVT-63	Shivta	Tepper, Bar-Oz and Gini	Daniel Fuks	2016-2020	K	153	1513	23	?אשל הפרקים						1		1	1	2
SVT-63	Shivta	Tepper, Bar-Oz and Gini	Daniel Fuks	2016-2020	K	153	1513	24	דגני? לחבר בהמשך						1		1	1	2
SVT-63	Shivta	Tepper, Bar-Oz and Gini	Daniel Fuks	2016-2020	K	153	1513	25	שברי דגן								0	0	2
SVT-63	Shivta	Tepper, Bar-Oz and Gini	Daniel Fuks	2016-2020	K	153	1513	26	אמיך קוצני	Emex spinosa	פרי	fruit	ארכוביתיים	Polygonaceae			0	0	2		שבור, יהיה קשה להגדיר
SVT-63	Shivta	Tepper, Bar-Oz and Gini	Daniel Fuks	2016-2020	K	153	1513	27	?מקור חסידה						16	1	17	17	2		רצנטי
SVT-63	Shivta	Tepper, Bar-Oz and Gini	Daniel Fuks	2016-2020	K	153	1513	28	חלמית								0	0	2		מפוחם
SVT-63	Shivta	Tepper, Bar-Oz and Gini	Daniel Fuks	2016-2020	K	153	1513	29	גללי צאן								0	0	2		לא להתעסק
SVT-63	Shivta	Tepper, Bar-Oz and Gini	Daniel Fuks	2016-2020	K	153	1513	30	גללים								0	0	2
SVT-63	Shivta	Tepper, Bar-Oz and Gini	Daniel Fuks	2016-2020	K	153	1513	31	בלתי								0	0	2
SVT-63	Shivta	Tepper, Bar-Oz and Gini	Daniel Fuks	2016-2020	K	153	1513	32	בלתי למיין								0	0	2		HF
SVT-63	Shivta	Tepper, Bar-Oz and Gini	Daniel Fuks	2016-2020	K	153	1513	33	תמר מצוי	Phoenix dactylifera	שבר גלעין	stone fragment	Palmae	דקליים			0	0	2		HF
SVT-63	Shivta	Tepper, Bar-Oz and Gini	Daniel Fuks	2016-2020	K	153	1513	34	ציפרני החתול	Calendula sp.	זרעון	achene	Asteraceae	מורכבים			0	0	2		HF
SVT-63	Shivta	Tepper, Bar-Oz and Gini	Daniel Fuks	2016-2020	K	153	1513	35	גפן	Vitis vinifera	זג	exocarp	גפניים	Vitaceae					2		HF
SVT-63	Shivta	Tepper, Bar-Oz and Gini	Daniel Fuks	2016-2020	K	153	1513	36	בלתי ליואל		צימוק?					2	2	2	2
SVT-63	Shivta	Tepper, Bar-Oz and Gini	Daniel Fuks	2016-2020	K	153	1514	1	שעורה תרבותית	Hordeum vulgare	גרגיר	grain	דגניים	Gramineae	30	2	32	32	2
SVT-63	Shivta	Tepper, Bar-Oz and Gini	Daniel Fuks	2016-2020	K	153	1514	2	חיטה	Triticum sp.	גרגיר	grain	דגניים	Gramineae	36	3	39	39	2
SVT-63	Shivta	Tepper, Bar-Oz and Gini	Daniel Fuks	2016-2020	K	153	1514	3	חיטה/שעורה	Hordeum/Triticum	גרגיר	grain	דגניים	Gramineae	8	5	13	13	2
SVT-63	Shivta	Tepper, Bar-Oz and Gini	Daniel Fuks	2016-2020	K	153	1514	4	גפן	Vitis vinifera	חרצן	pip	גפניים	Vitaceae	7		7	7	2
SVT-64	Shivta	Tepper, Bar-Oz and Gini	Daniel Fuks	2016-2020	K	153	1556	1	שעורה תרבותית	Hordeum vulgare	גרגיר	grain	דגניים	Gramineae	13	1	14	14	2
SVT-64	Shivta	Tepper, Bar-Oz and Gini	Daniel Fuks	2016-2020	K	153	1556	2	חיטה	Triticum sp.	גרגיר	grain	דגניים	Gramineae	27	5	32	32	2
SVT-64	Shivta	Tepper, Bar-Oz and Gini	Daniel Fuks	2016-2020	K	153	1556	3	חיטה/שעורה	Hordeum/Triticum	גרגיר	grain	דגניים	Gramineae	7		7	7	2
SVT-64	Shivta	Tepper, Bar-Oz and Gini	Daniel Fuks	2016-2020	K	153	1556	4	גפן	Vitis vinifera	חרצן	pip	גפניים	Vitaceae	4	1	5	5	2
SVT-64	Shivta	Tepper, Bar-Oz and Gini	Daniel Fuks	2016-2020	K	153	1556	5	גפן	Vitis vinifera	זג	exocarp	גפניים	Vitaceae			0	0	2
SVT-64	Shivta	Tepper, Bar-Oz and Gini	Daniel Fuks	2016-2020	K	153	1556	6	פרקי דגן						19		19	19	2
SVT-64	Shivta	Tepper, Bar-Oz and Gini	Daniel Fuks	2016-2020	K	153	1556	7	קטניות						2		2	2	2		לא להתעסק
SVT-64	Shivta	Tepper, Bar-Oz and Gini	Daniel Fuks	2016-2020	K	153	1556	8	בקיים		פסיגים	cotyledon	פרפרניים	Fabaceae	4		4	4	2
SVT-64	Shivta	Tepper, Bar-Oz and Gini	Daniel Fuks	2016-2020	K	153	1556	9	בקיית הכרישנה	Vicia ervilia	זרע	seed	פרפרניים	Fabaceae	1		1	1	2
SVT-64	Shivta	Tepper, Bar-Oz and Gini	Daniel Fuks	2016-2020	K	153	1556	10	חלקי שדרה								0	0	2
SVT-64	Shivta	Tepper, Bar-Oz and Gini	Daniel Fuks	2016-2020	K	153	1556	11	ציפרני החתול	Calendula sp.	זרעון	achene	Asteraceae	מורכבים	1		1	1	2
SVT-64	Shivta	Tepper, Bar-Oz and Gini	Daniel Fuks	2016-2020	K	153	1556	12	?תרמיל-שלח						1		1	1	2
SVT-64	Shivta	Tepper, Bar-Oz and Gini	Daniel Fuks	2016-2020	K	153	1556	13	שברי דגן						4		4	4	2		?רצנטי
SVT-64	Shivta	Tepper, Bar-Oz and Gini	Daniel Fuks	2016-2020	K	153	1556	14	חרק						1		1	1	2		?דגני
SVT-64	Shivta	Tepper, Bar-Oz and Gini	Daniel Fuks	2016-2020	K	153	1556	15	בלתי						1		1	1	2		לחבר בהמשך
SVT-64	Shivta	Tepper, Bar-Oz and Gini	Daniel Fuks	2016-2020	K	153	1556	16	בלתי						1		1	1	2		קטן
SVT-64	Shivta	Tepper, Bar-Oz and Gini	Daniel Fuks	2016-2020	K	153	1556	17	בלתי								0	0	2
SVT-64	Shivta	Tepper, Bar-Oz and Gini	Daniel Fuks	2016-2020	K	153	1556	18	בלתי						1		1	1	2
SVT-64	Shivta	Tepper, Bar-Oz and Gini	Daniel Fuks	2016-2020	K	153	1556	19	אשל הפרקים	Tamarix aphylla							0	0	2		מפוחמים
SVT-64	Shivta	Tepper, Bar-Oz and Gini	Daniel Fuks	2016-2020	K	153	1556	20	גללים								0	0	2
SVT-64	Shivta	Tepper, Bar-Oz and Gini	Daniel Fuks	2016-2020	K	153	1556	21	גללי מכרסמים								0	0	2
SVT-64	Shivta	Tepper, Bar-Oz and Gini	Daniel Fuks	2016-2020	K	153	1556	22	זית אירופאי?	Olea europaea?	שבר קליפת הזרע	seed coat fragment				1	1	1	2		בלתי מוכרע
SVT-65	Shivta	Tepper, Bar-Oz and Gini	Daniel Fuks	2016-2020	K	153	1570	1	שעורה תרבותית	Hordeum vulgare	גרגיר	grain	דגניים	Gramineae	54		54	54	2		שתי מבחנות
SVT-65	Shivta	Tepper, Bar-Oz and Gini	Daniel Fuks	2016-2020	K	153	1570	2	חיטה	Triticum sp.	גרגיר	grain	דגניים	Gramineae	63		63	63	2
SVT-65	Shivta	Tepper, Bar-Oz and Gini	Daniel Fuks	2016-2020	K	153	1570	3	חיטה/שעורה	Hordeum/Triticum	גרגיר	grain	דגניים	Gramineae	22	3	25	25	2
SVT-65	Shivta	Tepper, Bar-Oz and Gini	Daniel Fuks	2016-2020	K	153	1570	4	גפן	Vitis vinifera	חרצן	pip	גפניים	Vitaceae	25		25	25	2
SVT-65	Shivta	Tepper, Bar-Oz and Gini	Daniel Fuks	2016-2020	K	153	1570	5	גפן	Vitis vinifera	צימוק	pericarp	גפניים	Vitaceae	8		8	8	2		מוסיף 4 חרצנים
SVT-65	Shivta	Tepper, Bar-Oz and Gini	Daniel Fuks	2016-2020	K	153	1570	6	דגן בלתי						8		8	8	2
SVT-65	Shivta	Tepper, Bar-Oz and Gini	Daniel Fuks	2016-2020	K	153	1570	7	שברי דגן								0	0	2
SVT-65	Shivta	Tepper, Bar-Oz and Gini	Daniel Fuks	2016-2020	K	153	1570	8	גפן	Vitis vinifera	זג	exocarp	גפניים	Vitaceae					2
SVT-65	Shivta	Tepper, Bar-Oz and Gini	Daniel Fuks	2016-2020	K	153	1570	9	גפן	Vitis vinifera	עוקץ	pedicel	גפניים	Vitaceae	1		1	1	2
SVT-65	Shivta	Tepper, Bar-Oz and Gini	Daniel Fuks	2016-2020	K	153	1570	10	חלקי שדרה						4		4	4	2		מתוכם 6 שורשים
SVT-65	Shivta	Tepper, Bar-Oz and Gini	Daniel Fuks	2016-2020	K	153	1570	11	פרקי דגן						26		26	26	2
SVT-65	Shivta	Tepper, Bar-Oz and Gini	Daniel Fuks	2016-2020	K	153	1570	12	בקיים		פסיגים	cotyledon	פרפרניים	Fabaceae	12		12	12	2
SVT-65	Shivta	Tepper, Bar-Oz and Gini	Daniel Fuks	2016-2020	K	153	1570	13	?דבקה						1		1	1	2
SVT-65	Shivta	Tepper, Bar-Oz and Gini	Daniel Fuks	2016-2020	K	153	1570	14	בקיית הכרשינה	Vicia ervilia	זרע	seed	פרפרניים	Fabaceae	4		4	4	2
SVT-65	Shivta	Tepper, Bar-Oz and Gini	Daniel Fuks	2016-2020	K	153	1570	15	אמיך קוצני	Emex spinosa	פרי	fruit	ארכוביתיים	Polygonaceae	3		3	3	2
SVT-65	Shivta	Tepper, Bar-Oz and Gini	Daniel Fuks	2016-2020	K	153	1570	16	בלתי								0	0	2		שתי מבחנות
SVT-65	Shivta	Tepper, Bar-Oz and Gini	Daniel Fuks	2016-2020	K	153	1570	17	תמר	Phoenix dactylifera	שברי גלעין					1	1	1	2
SVT-65	Shivta	Tepper, Bar-Oz and Gini	Daniel Fuks	2016-2020	K	153	1570	18	זית אירופאי	Olea europaea	גלעין	stone	זיתיים	Oleaceae		1	1	1	2		שמור היטב
SVT-65	Shivta	Tepper, Bar-Oz and Gini	Daniel Fuks	2016-2020	K	153	1570	19	בלתי							1	1	1	2		להגדיר בהמשך
SVT-65	Shivta	Tepper, Bar-Oz and Gini	Daniel Fuks	2016-2020	K	153	1570	20	גלל							1	1	1	2
SVT-66	Shivta	Tepper, Bar-Oz and Gini	Daniel Fuks	2016-2020	K	153	1579	1	שעורה תרבותית	Hordeum vulgare	גרגיר	grain	דגניים	Gramineae	57	8	65	65	2		שתי מבחנות
SVT-66	Shivta	Tepper, Bar-Oz and Gini	Daniel Fuks	2016-2020	K	153	1579	2	חיטה	Triticum sp.	גרגיר	grain	דגניים	Gramineae	60		60	60	2
SVT-66	Shivta	Tepper, Bar-Oz and Gini	Daniel Fuks	2016-2020	K	153	1579	3	חיטה/שעורה	Hordeum/Triticum	גרגיר	grain	דגניים	Gramineae	12		12	12	2
SVT-66	Shivta	Tepper, Bar-Oz and Gini	Daniel Fuks	2016-2020	K	153	1579	4	גפן	Vitis vinifera	חרצן	pip	גפניים	Vitaceae	21		21	21	2
SVT-66	Shivta	Tepper, Bar-Oz and Gini	Daniel Fuks	2016-2020	K	153	1579	5	שברי חיטה/שעורה								0	0	2
SVT-66	Shivta	Tepper, Bar-Oz and Gini	Daniel Fuks	2016-2020	K	153	1579	6	גפן	Vitis vinifera	עוקץ	pedicel	גפניים	Vitaceae	1		1	1	2
SVT-66	Shivta	Tepper, Bar-Oz and Gini	Daniel Fuks	2016-2020	K	153	1579	7	פרקי דגן						22		22	22	2
SVT-66	Shivta	Tepper, Bar-Oz and Gini	Daniel Fuks	2016-2020	K	153	1579	8	חלקי שדרה						7		7	7	2
SVT-66	Shivta	Tepper, Bar-Oz and Gini	Daniel Fuks	2016-2020	K	153	1579	9	בקיית הכרשינה	Vicia ervilia	זרע	seed	פרפרניים	Fabaceae	5		5	5	2
SVT-66	Shivta	Tepper, Bar-Oz and Gini	Daniel Fuks	2016-2020	K	153	1579	10	בקיית הכרשינה	Vicia ervilia	פסיגים	cotyledon	פרפרניים	Fabaceae	7		7	7	2		אפשר לספור 3 זרעים של כרשינה מזה
SVT-66	Shivta	Tepper, Bar-Oz and Gini	Daniel Fuks	2016-2020	K	153	1579	11	בקיי להגדרה						1		1	1	2
SVT-66	Shivta	Tepper, Bar-Oz and Gini	Daniel Fuks	2016-2020	K	153	1579	12	רימון מצוי	Punica granatum	זרע	seed	רימוניים	Lythraceae	2		3	3	2		זיהוי ודאי
SVT-66	Shivta	Tepper, Bar-Oz and Gini	Daniel Fuks	2016-2020	K	153	1579	13	שקד מצוי	Prunus amygdala	קליפה חיצונית		ורדיים	Rosaceae	1		1	1	2
SVT-66	Shivta	Tepper, Bar-Oz and Gini	Daniel Fuks	2016-2020	K	153	1579	14	Salsoleae	Salsoleae					2		2	2	2
SVT-66	Shivta	Tepper, Bar-Oz and Gini	Daniel Fuks	2016-2020	K	153	1579	15	אמיך קוצני	Emex spinosa	פרי	fruit	ארכוביתיים	Polygonaceae	1		1	1	2
SVT-66	Shivta	Tepper, Bar-Oz and Gini	Daniel Fuks	2016-2020	K	153	1579	16	?צימוק						1		1	1	2
SVT-66	Shivta	Tepper, Bar-Oz and Gini	Daniel Fuks	2016-2020	K	153	1579	17	גפן	Vitis vinifera	שבר חרצן	pip fragment	גפניים	Vitaceae					2
SVT-66	Shivta	Tepper, Bar-Oz and Gini	Daniel Fuks	2016-2020	K	153	1579	18	גפן	Vitis vinifera	זג	exocarp	גפניים	Vitaceae					2
SVT-66	Shivta	Tepper, Bar-Oz and Gini	Daniel Fuks	2016-2020	K	153	1579	19	בלתי								0	0	2
SVT-66	Shivta	Tepper, Bar-Oz and Gini	Daniel Fuks	2016-2020	K	153	1579	20	בלתי								0	0	2
SVT-66	Shivta	Tepper, Bar-Oz and Gini	Daniel Fuks	2016-2020	K	153	1579	21	גללי צאן								0	0	2
SVT-66	Shivta	Tepper, Bar-Oz and Gini	Daniel Fuks	2016-2020	K	153	1579	22	גלל								0	0	2
SVT-66	Shivta	Tepper, Bar-Oz and Gini	Daniel Fuks	2016-2020	K	153	1579	23	קשקשים(דג)								0	0	2
SVT-66	Shivta	Tepper, Bar-Oz and Gini	Daniel Fuks	2016-2020	K	153	1579	24	זית אירופאי	Olea europaea	קשווה		זיתיים	Oleaceae		1	1	1	2
SVT-66	Shivta	Tepper, Bar-Oz and Gini	Daniel Fuks	2016-2020	K	153	1579	25	תמר?		שבר גלעין					1	1	1	2		אני משוכנע שזה תמר אך מדובר בחלקיק קטן מאד
SVT-66	Shivta	Tepper, Bar-Oz and Gini	Daniel Fuks	2016-2020	K	153	1579	26	עדשה	Lens culinaris	זרע	seed	פרפרניים	Fabaceae		1	1	1	2
SVT-66	Shivta	Tepper, Bar-Oz and Gini	Daniel Fuks	2016-2020	K	153	1579	27	שיטה/ינבוט	Acacia/Prosopis farcta	שבר זרע	seed fragment	שיטיים	Mimosaceae		1	1	1	2
SVT-66	Shivta	Tepper, Bar-Oz and Gini	Daniel Fuks	2016-2020	K	153	1579	28	אפרסק	Prunus persica	שבר קליפה		ורדניים	Rosaceae		1	1	1	2		הזיהוי על בסיס עובי קליפה ועומק החורים. מתחבר גם לאפרסק מאותו לוקוס בסינון הגס
SVT-66	Shivta	Tepper, Bar-Oz and Gini	Daniel Fuks	2016-2020	K	153	1579	29	חרוב מצוי	Ceratonia siliqua	עלי	pistil	כליליים	Caesalpiniaceae		1	1	1	2
SVT-67	Shivta	Tepper, Bar-Oz and Gini	Daniel Fuks	2016-2020	K	153	1588	1	שעורה תרבותית	Hordeum vulgare	גרגיר	grain	דגניים	Gramineae	21	12	33	33	2
SVT-67	Shivta	Tepper, Bar-Oz and Gini	Daniel Fuks	2016-2020	K	153	1588	2	חיטה	Triticum sp.	גרגיר	grain	דגניים	Gramineae	33	13	46	46	2
SVT-67	Shivta	Tepper, Bar-Oz and Gini	Daniel Fuks	2016-2020	K	153	1588	3	חיטה/שעורה	Hordeum/Triticum	גרגיר	grain	דגניים	Gramineae	6		6	6	2
SVT-67	Shivta	Tepper, Bar-Oz and Gini	Daniel Fuks	2016-2020	K	153	1588	4	גפן	Vitis vinifera	חרצן	pip	גפניים	Vitaceae	22		22	22	2		HF+LF
SVT-67	Shivta	Tepper, Bar-Oz and Gini	Daniel Fuks	2016-2020	K	153	1588	5	?שעורת בר						2		2	2	2
SVT-67	Shivta	Tepper, Bar-Oz and Gini	Daniel Fuks	2016-2020	K	153	1588	6	דגני להגדרה						1		1	1	2
SVT-67	Shivta	Tepper, Bar-Oz and Gini	Daniel Fuks	2016-2020	K	153	1588	7	גפן	Vitis vinifera	עוקץ	pedicel	גפניים	Vitaceae	2	2	4	4	2
SVT-67	Shivta	Tepper, Bar-Oz and Gini	Daniel Fuks	2016-2020	K	153	1588	8	חלקי שדרה						3		3	3	2
SVT-67	Shivta	Tepper, Bar-Oz and Gini	Daniel Fuks	2016-2020	K	153	1588	9	חלקי שדרה						3		3	3	2		הקטן-HF
SVT-67	Shivta	Tepper, Bar-Oz and Gini	Daniel Fuks	2016-2020	K	153	1588	10	חלקי שדרה						1	1	2	2	2
SVT-67	Shivta	Tepper, Bar-Oz and Gini	Daniel Fuks	2016-2020	K	153	1588	11	cf. רימן מצוי	cf. Punica granatum	קליפה	rind			1		1	1	2
SVT-67	Shivta	Tepper, Bar-Oz and Gini	Daniel Fuks	2016-2020	K	153	1588	12	cf. רימן מצוי	cf. Punica granatum	זרע	seed					0	0	2
SVT-67	Shivta	Tepper, Bar-Oz and Gini	Daniel Fuks	2016-2020	K	153	1588	13	פרקי דגן								0	0	2
SVT-67	Shivta	Tepper, Bar-Oz and Gini	Daniel Fuks	2016-2020	K	153	1588	14	מוץ/גלומה						3		3	3	2
SVT-67	Shivta	Tepper, Bar-Oz and Gini	Daniel Fuks	2016-2020	K	153	1588	15	בקיים		פסיגים	cotyledon	פרפרניים	Fabaceae	4		4	4	2		כנראה כרשינה
SVT-67	Shivta	Tepper, Bar-Oz and Gini	Daniel Fuks	2016-2020	K	153	1588	16	בקיים-לחבר בהמשך		זרע	seed	פרפרניים	Fabaceae	2		2	2	2		אני חושב טופח ספרדי אך יואל לא מאשר כי זה מפוצץ מדיי
SVT-67	Shivta	Tepper, Bar-Oz and Gini	Daniel Fuks	2016-2020	K	153	1588	17	בקיה תרבותית/ טופח	Vicia sativa/ Lathyrus	זרע	seed	פרפרניים	Fabaceae		1	1	1	2		מיואל
SVT-67	Shivta	Tepper, Bar-Oz and Gini	Daniel Fuks	2016-2020	K	153	1588	18	בקיים							2	2	2	2
SVT-67	Shivta	Tepper, Bar-Oz and Gini	Daniel Fuks	2016-2020	K	153	1588	19	קטנית להגדרה: בקיה א"י?	Legume for ID	זרע	seed	פרפרניים	Fabaceae		1	1	1	2		אני: טופח ספרדי. יואל: לא, אולי בקיה א"י בזכות טבורית ארוכה יותר מבקיה תרבותית, זרע כדורי פחוס, עדשה גדולה ורחוקה מהטבורית			השווה: 62-29, 67-19, 87-44, 91-152
SVT-67	Shivta	Tepper, Bar-Oz and Gini	Daniel Fuks	2016-2020	K	153	1588	20	בקיי להגדרה						1		1	1	2
SVT-67	Shivta	Tepper, Bar-Oz and Gini	Daniel Fuks	2016-2020	K	153	1588	21	בקיי להגדרה						1		1	1	2
SVT-67	Shivta	Tepper, Bar-Oz and Gini	Daniel Fuks	2016-2020	K	153	1588	22	תמר מצוי	Phoenix dactylifera	גלעין	stone	דקליים	Palmae		2	2	2	2
SVT-67	Shivta	Tepper, Bar-Oz and Gini	Daniel Fuks	2016-2020	K	153	1588	23	שלמון	Cephalaria					1		1	1	2
SVT-67	Shivta	Tepper, Bar-Oz and Gini	Daniel Fuks	2016-2020	K	153	1588	24	ציפורניים						1		1	1	2
SVT-67	Shivta	Tepper, Bar-Oz and Gini	Daniel Fuks	2016-2020	K	153	1588	25	אמיך קוצני	Emex spinosa	פרי	fruit	ארכוביתיים	Polygonaceae	1		1	1	2
SVT-67	Shivta	Tepper, Bar-Oz and Gini	Daniel Fuks	2016-2020	K	153	1588	26	cf. בקיית הכרשינה	cf. Vicia ervilia	זרע	seed	פרפרניים	Fabaceae	2		2	2	2
SVT-67	Shivta	Tepper, Bar-Oz and Gini	Daniel Fuks	2016-2020	K	153	1588	27	גלל+תאנה							1	1	1	2
SVT-67	Shivta	Tepper, Bar-Oz and Gini	Daniel Fuks	2016-2020	K	153	1588	28	cf. עדשה	cf. Lens culinaris						1	1	1	2
SVT-67	Shivta	Tepper, Bar-Oz and Gini	Daniel Fuks	2016-2020	K	153	1588	29	בלתי							1	1	1	2		HF+LF			?לבנה
SVT-67	Shivta	Tepper, Bar-Oz and Gini	Daniel Fuks	2016-2020	K	153	1588	30	גפן	Vitis vinifera	זג	exocarp	גפניים	Vitaceae					2
SVT-67	Shivta	Tepper, Bar-Oz and Gini	Daniel Fuks	2016-2020	K	153	1588	31	בקיית הכרשינה	Vicia ervilia	זרע	seed	פרפרניים	Fabaceae		1	1	1	2		HF+LF
SVT-67	Shivta	Tepper, Bar-Oz and Gini	Daniel Fuks	2016-2020	K	153	1588	32	?מוץ								0	0	2
SVT-67	Shivta	Tepper, Bar-Oz and Gini	Daniel Fuks	2016-2020	K	153	1588	33	שברי דגן								0	0	2
SVT-67	Shivta	Tepper, Bar-Oz and Gini	Daniel Fuks	2016-2020	K	153	1588	34	בקיים-בלתי						5		5	5	2
SVT-67	Shivta	Tepper, Bar-Oz and Gini	Daniel Fuks	2016-2020	K	153	1588	35	שקד מצוי	Prunus amygdala	קליפה		ורדיים	Rosaceae		1	1	1	2		?אלה אטלנטית
SVT-67	Shivta	Tepper, Bar-Oz and Gini	Daniel Fuks	2016-2020	K	153	1588	36	אלה אטלנטית	Pistacia atlantica	זרע	seed	אלתיים	Anacardiaceae		2	2	2	2
SVT-67	Shivta	Tepper, Bar-Oz and Gini	Daniel Fuks	2016-2020	K	153	1588	37	בלתי להגדיר							1	1	1	2
SVT-67	Shivta	Tepper, Bar-Oz and Gini	Daniel Fuks	2016-2020	K	153	1588	38	בלתי								0	0	2
SVT-67	Shivta	Tepper, Bar-Oz and Gini	Daniel Fuks	2016-2020	K	153	1588	39	בלתי							1	1	1	2
SVT-67	Shivta	Tepper, Bar-Oz and Gini	Daniel Fuks	2016-2020	K	153	1588	40	בלתי						1		1	1	2
SVT-67	Shivta	Tepper, Bar-Oz and Gini	Daniel Fuks	2016-2020	K	153	1588	41	בלתי								0	0	2
SVT-67	Shivta	Tepper, Bar-Oz and Gini	Daniel Fuks	2016-2020	K	153	1588	42	cf. אלה	cf. Pistacia	ענבה	fruit	אלתיים	Anacardiaceae			1	1	2
SVT-67	Shivta	Tepper, Bar-Oz and Gini	Daniel Fuks	2016-2020	K	153	1588	43	טופח ספרדי	Lathyrus clymenum	זרע	seed	פרפרניים	Fabaceae			1	1	2		HF+LF
SVT-67	Shivta	Tepper, Bar-Oz and Gini	Daniel Fuks	2016-2020	K	153	1588	44	גללים								0	0	2
SVT-68	Shivta	Tepper, Bar-Oz and Gini	Daniel Fuks	2016-2020	K	153	1599	1	שעורה תרבותית	Hordeum vulgare	גרגיר	grain	דגניים	Gramineae	35	12	47	47	2
SVT-68	Shivta	Tepper, Bar-Oz and Gini	Daniel Fuks	2016-2020	K	153	1599	2	חיטה	Triticum sp.	גרגיר	grain	דגניים	Gramineae	36	15	51	51	2
SVT-68	Shivta	Tepper, Bar-Oz and Gini	Daniel Fuks	2016-2020	K	153	1599	3	חיטה/שעורה	Hordeum/Triticum	גרגיר	grain	דגניים	Gramineae	13	11	24	24	2
SVT-68	Shivta	Tepper, Bar-Oz and Gini	Daniel Fuks	2016-2020	K	153	1599	4	גפן	Vitis vinifera	חרצן	pip	גפניים	Vitaceae	19	10	29	29	2		אולי יש בלבלול בין 68-4 ו-67-4
SVT-68	Shivta	Tepper, Bar-Oz and Gini	Daniel Fuks	2016-2020	K	153	1599	5	תמר	Phoenix dactylifera					2		2	2	2
SVT-68	Shivta	Tepper, Bar-Oz and Gini	Daniel Fuks	2016-2020	K	153	1599	6	גפן	Vitis vinifera	עוקץ	pedicel	גפניים	Vitaceae	2		2	2	2
SVT-68	Shivta	Tepper, Bar-Oz and Gini	Daniel Fuks	2016-2020	K	153	1599	7	?גפן	Vitis vinifera??	?צימוק	raisin?	גפניים	Vitaceae	2		2	2	2		להשוות לפרחי גפן
SVT-68	Shivta	Tepper, Bar-Oz and Gini	Daniel Fuks	2016-2020	K	153	1599	8	דבקה	Galium					2		2	2	2
SVT-68	Shivta	Tepper, Bar-Oz and Gini	Daniel Fuks	2016-2020	K	153	1599	9	רימון מצוי	Punica granatum	קליפה וכתר	rind and crown	רימוניים	Lythraceae	1		1	1	2
SVT-68	Shivta	Tepper, Bar-Oz and Gini	Daniel Fuks	2016-2020	K	153	1599	10	בלתי								0	0	2		?תאנה
SVT-68	Shivta	Tepper, Bar-Oz and Gini	Daniel Fuks	2016-2020	K	153	1599	11	?מוץ								0	0	2
SVT-68	Shivta	Tepper, Bar-Oz and Gini	Daniel Fuks	2016-2020	K	153	1599	12	חלקי שדרה								0	0	2
SVT-68	Shivta	Tepper, Bar-Oz and Gini	Daniel Fuks	2016-2020	K	153	1599	13	פרקי דגן								0	0	2		למדוד ולהגדיר
SVT-68	Shivta	Tepper, Bar-Oz and Gini	Daniel Fuks	2016-2020	K	153	1599	14	?שעורה	Hordeum vulgare	גרגיר	grain	Gramineae	דגניים			0	0	2
SVT-68	Shivta	Tepper, Bar-Oz and Gini	Daniel Fuks	2016-2020	K	153	1599	15	?ציפורני החתול						1		1	1	2
SVT-68	Shivta	Tepper, Bar-Oz and Gini	Daniel Fuks	2016-2020	K	153	1599	16	בקיים		זרע	seed	פרפרניים	Fabaceae	2		2	2	2		לא להתעסק
SVT-68	Shivta	Tepper, Bar-Oz and Gini	Daniel Fuks	2016-2020	K	153	1599	17	cf. בקיית הכרשינה	cf. Vicia ervilia	פסיגים	cotyledon			1		1	1	2		LFייתכן בלבול ומדובר ב
SVT-68	Shivta	Tepper, Bar-Oz and Gini	Daniel Fuks	2016-2020	K	153	1599	18	גפן	Vitis vinifera	זג	exocarp	גפניים	Vitaceae		1	1	1	2
SVT-68	Shivta	Tepper, Bar-Oz and Gini	Daniel Fuks	2016-2020	K	153	1599	19	רימון מצוי	Punica granatum	זרע	seed	רימוניים	Lythraceae			1	1	2
SVT-68	Shivta	Tepper, Bar-Oz and Gini	Daniel Fuks	2016-2020	K	153	1599	20	פרקים סלקיים	Salsoleae							0	0	2
SVT-68	Shivta	Tepper, Bar-Oz and Gini	Daniel Fuks	2016-2020	K	153	1599	21	אמיך קוצני	Emex spinosa	פרי	fruit	ארכוביתיים	Polygonaceae	1		1	1	2
SVT-68	Shivta	Tepper, Bar-Oz and Gini	Daniel Fuks	2016-2020	K	153	1599	22	שברי דגן								0	0	2		להגדיר בהמשך
SVT-68	Shivta	Tepper, Bar-Oz and Gini	Daniel Fuks	2016-2020	K	153	1599	23	בלתי						2		2	2	2
SVT-68	Shivta	Tepper, Bar-Oz and Gini	Daniel Fuks	2016-2020	K	153	1599	24	רצנטי						2		2	2	2
SVT-68	Shivta	Tepper, Bar-Oz and Gini	Daniel Fuks	2016-2020	K	153	1599	25	בלתי								0	0	2
SVT-68	Shivta	Tepper, Bar-Oz and Gini	Daniel Fuks	2016-2020	K	153	1599	26	גללים								0	0	2		כולל שניים קטנים
SVT-68	Shivta	Tepper, Bar-Oz and Gini	Daniel Fuks	2016-2020	K	153	1599	27	צימוק							3	3	3	2
SVT-68	Shivta	Tepper, Bar-Oz and Gini	Daniel Fuks	2016-2020	K	153	1599	28	בלתי								0	0	2
SVT-68	Shivta	Tepper, Bar-Oz and Gini	Daniel Fuks	2016-2020	K	153	1599	29	?גלל מכרסם								0	0	2
SVT-68	Shivta	Tepper, Bar-Oz and Gini	Daniel Fuks	2016-2020	K	153	1599	30	גפן	Vitis vinifera	עוקץ	pedicel	גפניים	Vitaceae		1	1	1	2		לצלם
SVT-68	Shivta	Tepper, Bar-Oz and Gini	Daniel Fuks	2016-2020	K	153	1599	31	בקיים		פסיגים	cotyledon	פרפרניים	Fabaceae		1	1	1	2		לא להתעסק
SVT-68	Shivta	Tepper, Bar-Oz and Gini	Daniel Fuks	2016-2020	K	153	1599	32	זית אירופאי	Olea europaea			זיתיים	Oleaceae		2	2	2	2
SVT-68	Shivta	Tepper, Bar-Oz and Gini	Daniel Fuks	2016-2020	K	153	1599	33	בקיית הכרשינה	Vicia ervilia	זרע	seed	פרפרניים	Fabaceae		1	1	1	2
SVT-68	Shivta	Tepper, Bar-Oz and Gini	Daniel Fuks	2016-2020	K	153	1599	34	ליואל							1	1	1	2
SVT-68	Shivta	Tepper, Bar-Oz and Gini	Daniel Fuks	2016-2020	K	153	1599	35	ליואל							1	1	1	2
SVT-68	Shivta	Tepper, Bar-Oz and Gini	Daniel Fuks	2016-2020	K	153	1599	36	תמר	Phoenix dactylifera							0	0	2		שתי מבחנות
SVT-69	Shivta	Tepper, Bar-Oz and Gini	Daniel Fuks	2016-2020	K	153	1602	1	שעורה תרבותית	Hordeum vulgare	גרגיר	grain	דגניים	Gramineae	66	18	84	84	2
SVT-69	Shivta	Tepper, Bar-Oz and Gini	Daniel Fuks	2016-2020	K	153	1602	2	חיטה	Triticum sp.	גרגיר	grain	דגניים	Gramineae	45	16	61	61	2
SVT-69	Shivta	Tepper, Bar-Oz and Gini	Daniel Fuks	2016-2020	K	153	1602	3	חיטה/שעורה	Hordeum/Triticum	גרגיר	grain	דגניים	Gramineae	20	8	28	28	2
SVT-69	Shivta	Tepper, Bar-Oz and Gini	Daniel Fuks	2016-2020	K	153	1602	4	גפן	Vitis vinifera	חרצן	pip	גפניים	Vitaceae	31	6	37	37	2
SVT-69	Shivta	Tepper, Bar-Oz and Gini	Daniel Fuks	2016-2020	K	153	1602	5	פרקי דגן						24		24	24	2
SVT-69	Shivta	Tepper, Bar-Oz and Gini	Daniel Fuks	2016-2020	K	153	1602	6	גפן	Vitis vinifera	צימוק	pericarp	גפניים	Vitaceae	4	1	5	5	2		מוסיף 4 חרצנים
SVT-69	Shivta	Tepper, Bar-Oz and Gini	Daniel Fuks	2016-2020	K	153	1602	7	?גפן	Vitis vinifera??	?צימוק	raisin?	גפניים	Vitaceae	1		1	1	2
SVT-69	Shivta	Tepper, Bar-Oz and Gini	Daniel Fuks	2016-2020	K	153	1602	8	חרוב מצוי	Ceratonia siliqua	זרע	seed	כליליים	Caesalpiniaceae	1		1	1	2
SVT-69	Shivta	Tepper, Bar-Oz and Gini	Daniel Fuks	2016-2020	K	153	1602	9	דגני						1		1	1	2
SVT-69	Shivta	Tepper, Bar-Oz and Gini	Daniel Fuks	2016-2020	K	153	1602	10	בקיית הכרשינה	Vicia ervilia	זרע	seed	פרפרניים	Fabaceae	2	3	5	5	2
SVT-69	Shivta	Tepper, Bar-Oz and Gini	Daniel Fuks	2016-2020	K	153	1602	11	שברי דגן								0	0	2
SVT-69	Shivta	Tepper, Bar-Oz and Gini	Daniel Fuks	2016-2020	K	153	1602	12	דגני להגדרה						1		1	1	2
SVT-69	Shivta	Tepper, Bar-Oz and Gini	Daniel Fuks	2016-2020	K	153	1602	13	?יפרוק המדבר						1		1	1	2
SVT-69	Shivta	Tepper, Bar-Oz and Gini	Daniel Fuks	2016-2020	K	153	1602	14	cf. רימון מצוי	cf. Punica granatum	קליפה	rind	cf. רימוניים	cf. Lythraceae	1		1	1	2
SVT-69	Shivta	Tepper, Bar-Oz and Gini	Daniel Fuks	2016-2020	K	153	1602	15	?עץ						1		1	1	2
SVT-69	Shivta	Tepper, Bar-Oz and Gini	Daniel Fuks	2016-2020	K	153	1602	16	מתנן						2		2	2	2
SVT-69	Shivta	Tepper, Bar-Oz and Gini	Daniel Fuks	2016-2020	K	153	1602	17	תאנה?? ציפה						7		7	7	2
SVT-69	Shivta	Tepper, Bar-Oz and Gini	Daniel Fuks	2016-2020	K	153	1602	18	גפן	Vitis vinifera	זג	exocarp	גפניים	Vitaceae			0	0	2
SVT-69	Shivta	Tepper, Bar-Oz and Gini	Daniel Fuks	2016-2020	K	153	1602	19	חלקי שדרה						1		1	1	2
SVT-69	Shivta	Tepper, Bar-Oz and Gini	Daniel Fuks	2016-2020	K	153	1602	20	תאנה? ציפה						1		1	1	2
SVT-69	Shivta	Tepper, Bar-Oz and Gini	Daniel Fuks	2016-2020	K	153	1602	21	אמיך קוצני	Emex spinosa	פרי	fruit	ארכוביתיים	Polygonaceae			0	0	2		להגדיר
SVT-69	Shivta	Tepper, Bar-Oz and Gini	Daniel Fuks	2016-2020	K	153	1602	22	מורכבים						1		1	1	2
SVT-69	Shivta	Tepper, Bar-Oz and Gini	Daniel Fuks	2016-2020	K	153	1602	23	בלתי						1		1	1	2
SVT-69	Shivta	Tepper, Bar-Oz and Gini	Daniel Fuks	2016-2020	K	153	1602	24	בלתי						1		1	1	2
SVT-69	Shivta	Tepper, Bar-Oz and Gini	Daniel Fuks	2016-2020	K	153	1602	25	זנב-עקרב? קדד?		זרע	seed	פרפרניים	Fabaceae	1		1	1	2
SVT-69	Shivta	Tepper, Bar-Oz and Gini	Daniel Fuks	2016-2020	K	153	1602	26	cf. שקד מצוי	cf. Prunus amygdala	קליפה חיצונית		ורדיים	Rosaceae			1	1	2
SVT-69	Shivta	Tepper, Bar-Oz and Gini	Daniel Fuks	2016-2020	K	153	1602	27	cf. שקד מצוי	cf. Prunus amygdala	קליפה חיצונית		ורדיים	Rosaceae			1	1	2
SVT-69	Shivta	Tepper, Bar-Oz and Gini	Daniel Fuks	2016-2020	K	153	1602	28	יפרוק						1		1	1	2
SVT-69	Shivta	Tepper, Bar-Oz and Gini	Daniel Fuks	2016-2020	K	153	1602	29	בלתי								0	0	2
SVT-69	Shivta	Tepper, Bar-Oz and Gini	Daniel Fuks	2016-2020	K	153	1602	30	יפרוק								0	0	2
SVT-69	Shivta	Tepper, Bar-Oz and Gini	Daniel Fuks	2016-2020	K	153	1602	31	בלתי						1		1	1	2
SVT-69	Shivta	Tepper, Bar-Oz and Gini	Daniel Fuks	2016-2020	K	153	1602	32	בלתי								0	0	2
SVT-69	Shivta	Tepper, Bar-Oz and Gini	Daniel Fuks	2016-2020	K	153	1602	33	גללים								0	0	2
SVT-69	Shivta	Tepper, Bar-Oz and Gini	Daniel Fuks	2016-2020	K	153	1602	34	גללי מכרסם?								0	0	2
SVT-69	Shivta	Tepper, Bar-Oz and Gini	Daniel Fuks	2016-2020	K	153	1602	35	גללי צאן מכרסם								0	0	2
SVT-69	Shivta	Tepper, Bar-Oz and Gini	Daniel Fuks	2016-2020	K	153	1602	36	קשקשים(דג)								0	0	2
SVT-69	Shivta	Tepper, Bar-Oz and Gini	Daniel Fuks	2016-2020	K	153	1602	37	גפן	Vitis vinifera	עוקץ	pedicel	גפניים	Vitaceae		2	2	2
SVT-69	Shivta	Tepper, Bar-Oz and Gini	Daniel Fuks	2016-2020	K	153	1602	38	שקד	Prunus amygdala	קליפה קשה		ורדיים	Rosaceae			1	1
SVT-69	Shivta	Tepper, Bar-Oz and Gini	Daniel Fuks	2016-2020	K	153	1602	39	תמר	Phoenix dactylifera	שבר גלעין					1	1	1
SVT-69	Shivta	Tepper, Bar-Oz and Gini	Daniel Fuks	2016-2020	K	153	1602	40	זרע+גלל/ציפה?							1	1	1
SVT-69	Shivta	Tepper, Bar-Oz and Gini	Daniel Fuks	2016-2020	K	153	1602	41	בלתי							1	1	1
SVT-69	Shivta	Tepper, Bar-Oz and Gini	Daniel Fuks	2016-2020	K	153	1602	42	פרג זיפני?							1	1	1
SVT-69	Shivta	Tepper, Bar-Oz and Gini	Daniel Fuks	2016-2020	K	153	1602	43	בקיית הכרישנה	Vicia ervilia	זרע	seed	פרפרניים	Fabaceae		1	1	1
SVT-69	Shivta	Tepper, Bar-Oz and Gini	Daniel Fuks	2016-2020	K	153	1602	44	בקיית הכרישנה	Vicia ervilia	פסיגים	cotyledon	פרפרניים	Fabaceae			0	0
SVT-70	Shivta	Tepper, Bar-Oz and Gini	Daniel Fuks	2016-2020	K	153	1610	1	שעורה תרבותית	Hordeum vulgare	גרגיר	grain	דגניים	Gramineae	15	5	20	20	2
SVT-70	Shivta	Tepper, Bar-Oz and Gini	Daniel Fuks	2016-2020	K	153	1610	2	חיטה	Triticum sp.	גרגיר	grain	דגניים	Gramineae	18	6	24	24	2
SVT-70	Shivta	Tepper, Bar-Oz and Gini	Daniel Fuks	2016-2020	K	153	1610	3	חיטה/שעורה	Hordeum/Triticum	גרגיר	grain	דגניים	Gramineae	6	4	10	10	2
SVT-70	Shivta	Tepper, Bar-Oz and Gini	Daniel Fuks	2016-2020	K	153	1610	4	גפן	Vitis vinifera	חרצן	pip	גפניים	Vitaceae	3	3	6	6	2
SVT-70	Shivta	Tepper, Bar-Oz and Gini	Daniel Fuks	2016-2020	K	153	1610	5	גפן	Vitis vinifera	צימוק	pericarp	גפניים	Vitaceae			4	4	2
SVT-70	Shivta	Tepper, Bar-Oz and Gini	Daniel Fuks	2016-2020	K	153	1610	6	?גפן	Vitis vinifera??	?צימוק	pericarp?	גפניים?	Vitaceae?			3	3	2
SVT-70	Shivta	Tepper, Bar-Oz and Gini	Daniel Fuks	2016-2020	K	153	1610	7	פרקי דגן						19	1	20	20	2
SVT-70	Shivta	Tepper, Bar-Oz and Gini	Daniel Fuks	2016-2020	K	153	1610	8	שעורה שש טורית						1		1	1	2
SVT-70	Shivta	Tepper, Bar-Oz and Gini	Daniel Fuks	2016-2020	K	153	1610	9	חיטה-חלק שדרה								0	0	2
SVT-70	Shivta	Tepper, Bar-Oz and Gini	Daniel Fuks	2016-2020	K	153	1610	10	חיטת הלחם-חלקי שדרה								0	0	2
SVT-70	Shivta	Tepper, Bar-Oz and Gini	Daniel Fuks	2016-2020	K	153	1610	11	כרשינה	Vicia ervilia					4		4	4	2
SVT-70	Shivta	Tepper, Bar-Oz and Gini	Daniel Fuks	2016-2020	K	153	1610	12	בקיים		פסיגים	cotyledon	פרפרניים	Fabaceae	9		9	9	2		יש כרשינה
SVT-70	Shivta	Tepper, Bar-Oz and Gini	Daniel Fuks	2016-2020	K	153	1610	13	בקיים-לחבר בהמשך						1		1	1	2
SVT-70	Shivta	Tepper, Bar-Oz and Gini	Daniel Fuks	2016-2020	K	153	1610	14	טופח ספרדי	Lathyrus clymenum	זרע	seed	פרפרניים	Fabaceae	1		1	1	2
SVT-70	Shivta	Tepper, Bar-Oz and Gini	Daniel Fuks	2016-2020	K	153	1610	15	שקד מצוי	Prunus amygdala	קליפה קשה		ורדיים	Rosaceae	1		1	1	2
SVT-70	Shivta	Tepper, Bar-Oz and Gini	Daniel Fuks	2016-2020	K	153	1610	16	cf. רימון מצוי	cf. Punica granatum	קליפה	rind	cf. רימוניים	cf. Lythraceae	1		1	1	2
SVT-70	Shivta	Tepper, Bar-Oz and Gini	Daniel Fuks	2016-2020	K	153	1610	17	cf. שקד מצוי	cf. Prunus amygdala	קליפה חיצונית		ורדיים	Rosaceae			1	1	2
SVT-70	Shivta	Tepper, Bar-Oz and Gini	Daniel Fuks	2016-2020	K	153	1610	18							1		1	1	2
SVT-70	Shivta	Tepper, Bar-Oz and Gini	Daniel Fuks	2016-2020	K	153	1610	19	דגני להגדרה						1		1	1	2
SVT-70	Shivta	Tepper, Bar-Oz and Gini	Daniel Fuks	2016-2020	K	153	1610	20	עדשה	Lens culinaris	זרע	seed	פרפרניים	Fabaceae	1		1	1	2
SVT-70	Shivta	Tepper, Bar-Oz and Gini	Daniel Fuks	2016-2020	K	153	1610	21	זנב-עקרב שיכני	Scorpiurus muricatus	זרע	seed	פרפרניים	Fabaceae	1		1	1	2
SVT-70	Shivta	Tepper, Bar-Oz and Gini	Daniel Fuks	2016-2020	K	153	1610	22	בקיי?						1		1	1	2
SVT-70	Shivta	Tepper, Bar-Oz and Gini	Daniel Fuks	2016-2020	K	153	1610	23	?תפרחת-מורכבים						1		1	1	2
SVT-70	Shivta	Tepper, Bar-Oz and Gini	Daniel Fuks	2016-2020	K	153	1610	24	טופח ספרדי	Lathyrus clymenum	זרע	seed	פרפרניים	Fabaceae	1		1	1	2		אמנם בשברים אבל מתחבר לפי מימדי הילום ומימדי זרע
SVT-70	Shivta	Tepper, Bar-Oz and Gini	Daniel Fuks	2016-2020	K	153	1610	25	בלתי								0	0	2
SVT-70	Shivta	Tepper, Bar-Oz and Gini	Daniel Fuks	2016-2020	K	153	1610	26	cf. אשל הפרקים עם עפץ	cf. Tamarix aphylla					1		1	1	2
SVT-70	Shivta	Tepper, Bar-Oz and Gini	Daniel Fuks	2016-2020	K	153	1610	27	??תאנה								0	0	2
SVT-70	Shivta	Tepper, Bar-Oz and Gini	Daniel Fuks	2016-2020	K	153	1610	28	בלתי								0	0	2
SVT-70	Shivta	Tepper, Bar-Oz and Gini	Daniel Fuks	2016-2020	K	153	1610	29	?גלל								0	0	2
SVT-70	Shivta	Tepper, Bar-Oz and Gini	Daniel Fuks	2016-2020	K	153	1610	30	קשקשים(דג)								0	0	2
SVT-70	Shivta	Tepper, Bar-Oz and Gini	Daniel Fuks	2016-2020	K	153	1610	31	גללים								0	0	2		HF
SVT-70	Shivta	Tepper, Bar-Oz and Gini	Daniel Fuks	2016-2020	K	153	1610	32	גפן	Vitis vinifera	זג	exocarp	גפניים	Vitaceae			0	0	2		HF
SVT-70	Shivta	Tepper, Bar-Oz and Gini	Daniel Fuks	2016-2020	K	153	1610	33	גפן	Vitis vinifera	עוקץ	pedicel	גפניים	Vitaceae		1	1	1	2		HF
SVT-70	Shivta	Tepper, Bar-Oz and Gini	Daniel Fuks	2016-2020	K	153	1610	34		חלק שדרה	rachis fragment		Gramineae	דגניים		1	1	1	2		HF
SVT-70	Shivta	Tepper, Bar-Oz and Gini	Daniel Fuks	2016-2020	K	153	1610	35	בקיית הכרשינה	Vicia ervilia	זרע	seed	Fabaceae	פרפרניים		1	1	1	2		HF
SVT-70	Shivta	Tepper, Bar-Oz and Gini	Daniel Fuks	2016-2020	K	153	1610	36	cf. טופח ספרדי	cf. Lathyrus clymenum	פסיג	cotyledon	Fabaceae	פרפרניים		1	1	1	2		HF
SVT-70	Shivta	Tepper, Bar-Oz and Gini	Daniel Fuks	2016-2020	K	153	1610	37	קטנית להגדרה							1	1	1	2		HF			קטנה
SVT-70	Shivta	Tepper, Bar-Oz and Gini	Daniel Fuks	2016-2020	K	153	1610	38	בלתי		גלעין					1	1	1	2		HF
SVT-70	Shivta	Tepper, Bar-Oz and Gini	Daniel Fuks	2016-2020	K	153	1610	39	תמר מצוי	Phoenix dactylifera	שברי גלעין	stone fragment	Palmae	דקליים			0	0	2		HF
SVT-70	Shivta	Tepper, Bar-Oz and Gini	Daniel Fuks	2016-2020	K	153	1610	40	בלתי								0	0	2		HF
SVT-70	Shivta	Tepper, Bar-Oz and Gini	Daniel Fuks	2016-2020	K	153	1610	41	בלתי							1	1	1	2		HF
SVT-70	Shivta	Tepper, Bar-Oz and Gini	Daniel Fuks	2016-2020	K	153	1610	42	שיבולת שועל להגדרה	Avena sp.	צלקת וגלומה	grain	Gramineae	דגניים		1	1	1	2		HF
SVT-70	Shivta	Tepper, Bar-Oz and Gini	Daniel Fuks	2016-2020	K	153	1610	43	שברי דגן								0	0	2		HF
SVT-70	Shivta	Tepper, Bar-Oz and Gini	Daniel Fuks	2016-2020	K	153	1610	44	גללי מכרסם								0	0	2		HF
SVT-70	Shivta	Tepper, Bar-Oz and Gini	Daniel Fuks	2016-2020	K	153	1610	45	ברזל								0	0	2		HF
SVT-70	Shivta	Tepper, Bar-Oz and Gini	Daniel Fuks	2016-2020	K	153	1610	46	חותם עלה								0	0	2		HF
SVT-71	Shivta	Tepper, Bar-Oz and Gini	Daniel Fuks	2016-2020	K	154	1524	1	שעורה תרבותית	Hordeum vulgare	גרגיר	grain	Gramineae	דגניים	6	1	7	7	2
SVT-71	Shivta	Tepper, Bar-Oz and Gini	Daniel Fuks	2016-2020	K	154	1524	2	חיטה	Triticum sp.	גרגיר	grain	דגניים	Gramineae	11	1	12	12	2
SVT-71	Shivta	Tepper, Bar-Oz and Gini	Daniel Fuks	2016-2020	K	154	1524	3	חיטה/שעורה	Hordeum/Triticum	גרגיר	grain	דגניים	Gramineae	4	2	6	6	2
SVT-71	Shivta	Tepper, Bar-Oz and Gini	Daniel Fuks	2016-2020	K	154	1524	4	גפן	Vitis vinifera	חרצן	pip	גפניים	Vitaceae	1	2	3	3	2
SVT-71	Shivta	Tepper, Bar-Oz and Gini	Daniel Fuks	2016-2020	K	154	1524	5		פרק גבעול	culm node	Gramineae	דגניים		5	1	6	6	2
SVT-71	Shivta	Tepper, Bar-Oz and Gini	Daniel Fuks	2016-2020	K	154	1524	6	?חלקי שדרה-שעורה						1		1	1	2
SVT-71	Shivta	Tepper, Bar-Oz and Gini	Daniel Fuks	2016-2020	K	154	1524	7	חלקי שדרה						1		1	1	2
SVT-71	Shivta	Tepper, Bar-Oz and Gini	Daniel Fuks	2016-2020	K	154	1524	8	מלען						1		1	1	2
SVT-71	Shivta	Tepper, Bar-Oz and Gini	Daniel Fuks	2016-2020	K	154	1524	9	בלתי								0	0	2
SVT-71	Shivta	Tepper, Bar-Oz and Gini	Daniel Fuks	2016-2020	K	154	1524	10	בלתי								0	0	2
SVT-71	Shivta	Tepper, Bar-Oz and Gini	Daniel Fuks	2016-2020	K	154	1524	11	בלתי								0	0	2
SVT-71	Shivta	Tepper, Bar-Oz and Gini	Daniel Fuks	2016-2020	K	154	1524	12	בלתי								0	0	2
SVT-71	Shivta	Tepper, Bar-Oz and Gini	Daniel Fuks	2016-2020	K	154	1524	13	אשל הפרקים	Tamarix aphylla	גבעול	stem	אשליים	Tamaricaceae	1		1	1	2
SVT-71	Shivta	Tepper, Bar-Oz and Gini	Daniel Fuks	2016-2020	K	154	1524	14	אמיך קוצני	Emex spinosa	פרי	fruit	ארכוביתיים	Polygonaceae	28		28	28	2
SVT-71	Shivta	Tepper, Bar-Oz and Gini	Daniel Fuks	2016-2020	K	154	1524	15	שברי דגן								0	0	2
SVT-71	Shivta	Tepper, Bar-Oz and Gini	Daniel Fuks	2016-2020	K	154	1524	16	גללים								0	0	2
SVT-71	Shivta	Tepper, Bar-Oz and Gini	Daniel Fuks	2016-2020	K	154	1524	17	תמר מצוי	Phoenix dactylifera	שברי גלעין	stone fragment	Palmae	דקליים			0	0
SVT-71	Shivta	Tepper, Bar-Oz and Gini	Daniel Fuks	2016-2020	K	154	1524	18	בלתי							1	1	1			הזכיר לי חציל אך אין מספיק
SVT-72	Shivta	Tepper, Bar-Oz and Gini	Daniel Fuks	2016-2020	K	156	1565	1	שעורה תרבותית	Hordeum vulgare	גרגיר	grain	Gramineae	דגניים	36	6	42	42	2
SVT-72	Shivta	Tepper, Bar-Oz and Gini	Daniel Fuks	2016-2020	K	156	1565	2	חיטה	Triticum sp.	גרגיר	grain	דגניים	Gramineae	13	1	14	14	2
SVT-72	Shivta	Tepper, Bar-Oz and Gini	Daniel Fuks	2016-2020	K	156	1565	3	חיטה/שעורה	Hordeum/Triticum	גרגיר	grain	דגניים	Gramineae	9	3	12	12	2
SVT-72	Shivta	Tepper, Bar-Oz and Gini	Daniel Fuks	2016-2020	K	156	1565	4	גפן	Vitis vinifera	חרצן	pip	גפניים	Vitaceae	10	2	12	12	2
SVT-72	Shivta	Tepper, Bar-Oz and Gini	Daniel Fuks	2016-2020	K	156	1565	5	גפן	Vitis vinifera	זג	exocarp	גפניים	Vitaceae	1		1	1	2
SVT-72	Shivta	Tepper, Bar-Oz and Gini	Daniel Fuks	2016-2020	K	156	1565	6	גפן	Vitis vinifera	עוקץ	pedicel	גפניים	Vitaceae			0	0	2
SVT-72	Shivta	Tepper, Bar-Oz and Gini	Daniel Fuks	2016-2020	K	156	1565	7			פרק ציר שיבולת	rachis fragment	דגניים	Gramineae	14		14	14	2
SVT-72	Shivta	Tepper, Bar-Oz and Gini	Daniel Fuks	2016-2020	K	156	1565	8			פרק גבעול	culm node	Gramineae	דגניים	28	2	30	30	2
SVT-72	Shivta	Tepper, Bar-Oz and Gini	Daniel Fuks	2016-2020	K	156	1565	9	שעורה בגלל						1		1	1	2
SVT-72	Shivta	Tepper, Bar-Oz and Gini	Daniel Fuks	2016-2020	K	156	1565	10	חלקי גלומה								0	0	2
SVT-72	Shivta	Tepper, Bar-Oz and Gini	Daniel Fuks	2016-2020	K	156	1565	11	שברי דגן								0	0	2
SVT-72	Shivta	Tepper, Bar-Oz and Gini	Daniel Fuks	2016-2020	K	156	1565	12	אשל הפרקים	Tamarix aphylla					1		1	1	2
SVT-72	Shivta	Tepper, Bar-Oz and Gini	Daniel Fuks	2016-2020	K	156	1565	13	עדשה תרבותית	Lens culinaris	זרע	seed	פרפרניים	Fabaceae	1		1	1	2
SVT-72	Shivta	Tepper, Bar-Oz and Gini	Daniel Fuks	2016-2020	K	156	1565	14	בקיים						2		2	2	2
SVT-72	Shivta	Tepper, Bar-Oz and Gini	Daniel Fuks	2016-2020	K	156	1565	15	בקיים		פסיגים	cotyledon	Fabaceae	פרפרניים	4		4	4	2
SVT-72	Shivta	Tepper, Bar-Oz and Gini	Daniel Fuks	2016-2020	K	156	1565	16	בקיי						3		3	3	2
SVT-72	Shivta	Tepper, Bar-Oz and Gini	Daniel Fuks	2016-2020	K	156	1565	17	בקיית הכרשינה	Vicia ervilia	זרע	seed	פרפרניים	Fabaceae	1		1	1	2		צורה ארבעונית, שורשון וטבורית במקום הנכון למרות שהכל שחוק
SVT-72	Shivta	Tepper, Bar-Oz and Gini	Daniel Fuks	2016-2020	K	156	1565	18	cf. רימון מצוי	cf. Punica granatum	קליפה	rind fragment			1		1	1	2		קטן מדיי בשביל להכריע. הדגם החיצוני מתאים
SVT-72	Shivta	Tepper, Bar-Oz and Gini	Daniel Fuks	2016-2020	K	156	1565	19	תמר מצוי	Phoenix dactylifera	שבר גלעין	stone fragment	דקליים	Palmae			1	1	2
SVT-72	Shivta	Tepper, Bar-Oz and Gini	Daniel Fuks	2016-2020	K	156	1565	20	?בלתי-גבעול								0	0	2
SVT-72	Shivta	Tepper, Bar-Oz and Gini	Daniel Fuks	2016-2020	K	156	1565	21	בלתי-גבעול								0	0	2
SVT-72	Shivta	Tepper, Bar-Oz and Gini	Daniel Fuks	2016-2020	K	156	1565	22	רגל חרק מפוחמת								0	0	2
SVT-72	Shivta	Tepper, Bar-Oz and Gini	Daniel Fuks	2016-2020	K	156	1565	23	בלתי								0	0	2
SVT-72	Shivta	Tepper, Bar-Oz and Gini	Daniel Fuks	2016-2020	K	156	1565	24	?גלל מכרסם						2		2	2	2	מעניין-מפוחם
SVT-72	Shivta	Tepper, Bar-Oz and Gini	Daniel Fuks	2016-2020	K	156	1565	25	גללי מכרסם								0	0	2	רצנטי
SVT-72	Shivta	Tepper, Bar-Oz and Gini	Daniel Fuks	2016-2020	K	156	1565	26	גללים								0	0	2
SVT-72	Shivta	Tepper, Bar-Oz and Gini	Daniel Fuks	2016-2020	K	156	1565	27	בקיה/טופח		זרע	seed	פרפרניים	Fabaceae		1	1	1	2
SVT-72	Shivta	Tepper, Bar-Oz and Gini	Daniel Fuks	2016-2020	K	156	1565	28	תמר מצוי	Phoenix dactylifera	שבר גלעין	stone fragment	דקליים	Palmae			1	1	2
SVT-72	Shivta	Tepper, Bar-Oz and Gini	Daniel Fuks	2016-2020	K	156	1565	29	זית אירופאי	Olea europaea	שבר קליפת הזרע	seed coat fragment	זיתיים	Oleaceae			1	1	2
SVT-73	Shivta	Tepper, Bar-Oz and Gini	Daniel Fuks	2016-2020	K	156	1575	1	שעורה תרבותית	Hordeum vulgare	גרגיר	grain	Gramineae	דגניים	70	5	75	75	2	שתי מבחנות
SVT-73	Shivta	Tepper, Bar-Oz and Gini	Daniel Fuks	2016-2020	K	156	1575	2	חיטה	Triticum sp.	גרגיר	grain	דגניים	Gramineae	15		15	15	2
SVT-73	Shivta	Tepper, Bar-Oz and Gini	Daniel Fuks	2016-2020	K	156	1575	3	חיטה/שעורה	Hordeum/Triticum	גרגיר	grain	דגניים	Gramineae	10	3	13	13	2
SVT-73	Shivta	Tepper, Bar-Oz and Gini	Daniel Fuks	2016-2020	K	156	1575	4	גפן	Vitis vinifera	חרצן	pip	גפניים	Vitaceae	14	2	16	16	2
SVT-73	Shivta	Tepper, Bar-Oz and Gini	Daniel Fuks	2016-2020	K	156	1575	5			פרק ציר שיבולת	rachis fragment	דגניים	Gramineae	14	1	15	15	2
SVT-73	Shivta	Tepper, Bar-Oz and Gini	Daniel Fuks	2016-2020	K	156	1575	6			פרק גבעול	culm node	Gramineae	דגניים	28		28	28	2
SVT-73	Shivta	Tepper, Bar-Oz and Gini	Daniel Fuks	2016-2020	K	156	1575	7	גפן	Vitis vinifera	זג	exocarp	גפניים	Vitaceae			0	0	2
SVT-73	Shivta	Tepper, Bar-Oz and Gini	Daniel Fuks	2016-2020	K	156	1575	8	בקיית הכרשינה	Vicia ervilia	זרע	seed	פרפרניים	Fabaceae	2		2	2	2		פסלתי טופח חימצתי לפי הקריטריונים בעמ' 173 מח' 2
SVT-73	Shivta	Tepper, Bar-Oz and Gini	Daniel Fuks	2016-2020	K	156	1575	9	בקיית הכרשינה	Vicia ervilia	זרע	seed	פרפרניים	Fabaceae	2		1	1	2		2 פסיגים שמתחברים
SVT-73	Shivta	Tepper, Bar-Oz and Gini	Daniel Fuks	2016-2020	K	156	1575	10	אשל הפרקים	Tamarix aphylla	גבעול	stem	אשליים	Tamaricaceae	1		1	1	2
SVT-73	Shivta	Tepper, Bar-Oz and Gini	Daniel Fuks	2016-2020	K	156	1575	11	חלקי גלומה								0	0	2
SVT-73	Shivta	Tepper, Bar-Oz and Gini	Daniel Fuks	2016-2020	K	156	1575	12	שברי דגן								0	0	2
SVT-73	Shivta	Tepper, Bar-Oz and Gini	Daniel Fuks	2016-2020	K	156	1575	13	אמיך קוצני	Emex spinosa	פרי	fruit	ארכוביתיים	Polygonaceae	1		1	1	2
SVT-73	Shivta	Tepper, Bar-Oz and Gini	Daniel Fuks	2016-2020	K	156	1575	14	תמר מצוי	Phoenix dactylifera	שבר גלעין	stone fragment	דקליים	Palmae			1	1	2
SVT-73	Shivta	Tepper, Bar-Oz and Gini	Daniel Fuks	2016-2020	K	156	1575	15	בקיים		פסיגים	cotyledon	Fabaceae	פרפרניים	7		7	7	2
SVT-73	Shivta	Tepper, Bar-Oz and Gini	Daniel Fuks	2016-2020	K	156	1575	16	עדשה תרבותית	Lens culinaris	זרע	seed	פרפרניים	Fabaceae	2		2	2	2
SVT-73	Shivta	Tepper, Bar-Oz and Gini	Daniel Fuks	2016-2020	K	156	1575	17	זנב-עקרב שיכני	Scorpiurus muricatus	זרע	seed	פרפרניים	Fabaceae	1		1	1	2
SVT-73	Shivta	Tepper, Bar-Oz and Gini	Daniel Fuks	2016-2020	K	156	1575	18	בלתי								0	0	2
SVT-73	Shivta	Tepper, Bar-Oz and Gini	Daniel Fuks	2016-2020	K	156	1575	19	בלתי								0	0	2
SVT-73	Shivta	Tepper, Bar-Oz and Gini	Daniel Fuks	2016-2020	K	156	1575	20	בלתי						1		1	1	2
SVT-73	Shivta	Tepper, Bar-Oz and Gini	Daniel Fuks	2016-2020	K	156	1575	21	cf. רימון מצוי	cf. Punica granatum	שבר זרע	seed fragment			1		1	1	2	שני שברים שמתחברות
SVT-73	Shivta	Tepper, Bar-Oz and Gini	Daniel Fuks	2016-2020	K	156	1575	22	בלתי						1		1	1	2
SVT-73	Shivta	Tepper, Bar-Oz and Gini	Daniel Fuks	2016-2020	K	156	1575	23	?תפרחת						1		1	1	2
SVT-73	Shivta	Tepper, Bar-Oz and Gini	Daniel Fuks	2016-2020	K	156	1575	24	גללי מכרסם								0	0	2
SVT-73	Shivta	Tepper, Bar-Oz and Gini	Daniel Fuks	2016-2020	K	156	1575	25	גללים								0	0	2
SVT-73	Shivta	Tepper, Bar-Oz and Gini	Daniel Fuks	2016-2020	K	156	1575	26	זית אירופאי	Olea europaea	שבר קליפת הזרע	seed coat fragment	זיתיים	Oleaceae			1	1
SVT-73	Shivta	Tepper, Bar-Oz and Gini	Daniel Fuks	2016-2020	K	156	1575	27	בלתי		פסיגים?					2	2	2
SVT-73	Shivta	Tepper, Bar-Oz and Gini	Daniel Fuks	2016-2020	K	156	1575	28	בלתי-לא להתעסק								0	0
SVT-74	Shivta	Tepper, Bar-Oz and Gini	Daniel Fuks	2016-2020	K	156	1585	1	שעורה תרבותית	Hordeum vulgare	גרגיר	grain	Gramineae	דגניים	20	2	22	22	2
SVT-74	Shivta	Tepper, Bar-Oz and Gini	Daniel Fuks	2016-2020	K	156	1585	2	חיטה	Triticum sp.	גרגיר	grain	דגניים	Gramineae	7	2	9	9	2
SVT-74	Shivta	Tepper, Bar-Oz and Gini	Daniel Fuks	2016-2020	K	156	1585	3	חיטה/שעורה	Hordeum/Triticum	גרגיר	grain	דגניים	Gramineae	5	2	7	7	2
SVT-74	Shivta	Tepper, Bar-Oz and Gini	Daniel Fuks	2016-2020	K	156	1585	4	גפן	Vitis vinifera	חרצן	pip	גפניים	Vitaceae	34	4	38	38	2
SVT-74	Shivta	Tepper, Bar-Oz and Gini	Daniel Fuks	2016-2020	K	156	1585	5			פרק ציר שיבולת	rachis fragment	דגניים	Gramineae	1		1	1	2
SVT-74	Shivta	Tepper, Bar-Oz and Gini	Daniel Fuks	2016-2020	K	156	1585	6			פרק גבעול	culm node	Gramineae	דגניים	16		16	16	2
SVT-74	Shivta	Tepper, Bar-Oz and Gini	Daniel Fuks	2016-2020	K	156	1585	7	שורשי דגן						4		4	4	2
SVT-74	Shivta	Tepper, Bar-Oz and Gini	Daniel Fuks	2016-2020	K	156	1585	8	בקיים		פסיגים	cotyledon	Fabaceae	פרפרניים	5		5	5	2
SVT-74	Shivta	Tepper, Bar-Oz and Gini	Daniel Fuks	2016-2020	K	156	1585	9	גפן	Vitis vinifera	עוקץ	pedicel	גפניים	Vitaceae	2		2	2	2
SVT-74	Shivta	Tepper, Bar-Oz and Gini	Daniel Fuks	2016-2020	K	156	1585	10	cf. בקיית הכרשינה	cf. Vicia ervilia	זרע	seed	פרפרניים	Fabaceae	1		1	1	2		לא נספר
SVT-74	Shivta	Tepper, Bar-Oz and Gini	Daniel Fuks	2016-2020	K	156	1585	11	cf. רימון מצוי	cf. Punica granatum	שבר זרע	seed fragment			1		1	1	2		רק חצי זרע
SVT-74	Shivta	Tepper, Bar-Oz and Gini	Daniel Fuks	2016-2020	K	156	1585	12	בלתי						2		2	2	2		אולי רימון
SVT-74	Shivta	Tepper, Bar-Oz and Gini	Daniel Fuks	2016-2020	K	156	1585	13	בלתי						1		1	1	2		אולי רימון
SVT-74	Shivta	Tepper, Bar-Oz and Gini	Daniel Fuks	2016-2020	K	156	1585	14	בלתי						1		1	1	2
SVT-74	Shivta	Tepper, Bar-Oz and Gini	Daniel Fuks	2016-2020	K	156	1585	15	בלתי						1		1	1	2
SVT-74	Shivta	Tepper, Bar-Oz and Gini	Daniel Fuks	2016-2020	K	156	1585	16	בלתי								0	0	2
SVT-74	Shivta	Tepper, Bar-Oz and Gini	Daniel Fuks	2016-2020	K	156	1585	17	בלתי								0	0	2
SVT-74	Shivta	Tepper, Bar-Oz and Gini	Daniel Fuks	2016-2020	K	156	1585	18	אמיך קוצני	Emex spinosa	פרי	fruit	ארכוביתיים	Polygonaceae	3		3	3	2
SVT-74	Shivta	Tepper, Bar-Oz and Gini	Daniel Fuks	2016-2020	K	156	1585	19	?גללי מכרסם								0	0	2	טוב-טיפוס של רבים מפוצחים
SVT-74	Shivta	Tepper, Bar-Oz and Gini	Daniel Fuks	2016-2020	K	156	1585	20	קטנית להגדרה								0	0	2
SVT-74	Shivta	Tepper, Bar-Oz and Gini	Daniel Fuks	2016-2020	K	156	1585	21	תמר מצוי	Phoenix dactylifera	שבר גלעין	stone fragment	דקליים	Palmae			1	1
SVT-74	Shivta	Tepper, Bar-Oz and Gini	Daniel Fuks	2016-2020	K	156	1585	22	גללים								0	0
SVT-74	Shivta	Tepper, Bar-Oz and Gini	Daniel Fuks	2016-2020	K	156	1585	23	בלתי								0	0
SVT-74	Shivta	Tepper, Bar-Oz and Gini	Daniel Fuks	2016-2020	K	156	1585	24	cf. רימון מצוי	cf. Punica granatum	שבר זרע	seed fragment					1	1			רק חצי זרע אבל מה שיש מתאים בצורה ויש את פס החיבור
SVT-74	Shivta	Tepper, Bar-Oz and Gini	Daniel Fuks	2016-2020	K	156	1585	25	בלתי								0	0
SVT-74	Shivta	Tepper, Bar-Oz and Gini	Daniel Fuks	2016-2020	K	156	1585	26	שקד מצוי	Prunus amygdala	קליפה	peel	ורדיים	Rosaceae			1	1
SVT-74	Shivta	Tepper, Bar-Oz and Gini	Daniel Fuks	2016-2020	K	156	1585	27	שברי דגן								0	0
SVT-74	Shivta	Tepper, Bar-Oz and Gini	Daniel Fuks	2016-2020	K	156	1585	28	גפן	Vitis vinifera	זג	exocarp	גפניים	Vitaceae			0	0
SVT-75	Shivta	Tepper, Bar-Oz and Gini	Daniel Fuks	2016-2020	K	156	1594	1	שעורה תרבותית	Hordeum vulgare	גרגיר	grain	דגניים	Gramineae	11	24	35	35	2
SVT-75	Shivta	Tepper, Bar-Oz and Gini	Daniel Fuks	2016-2020	K	156	1594	2	חיטה	Triticum sp.	גרגיר	grain	דגניים	Gramineae	11	6	17	17	2
SVT-75	Shivta	Tepper, Bar-Oz and Gini	Daniel Fuks	2016-2020	K	156	1594	3	חיטה/שעורה	Hordeum/Triticum	גרגיר	grain	דגניים	Gramineae	5	30	35	35	2
SVT-75	Shivta	Tepper, Bar-Oz and Gini	Daniel Fuks	2016-2020	K	156	1594	4	גפן	Vitis vinifera	חרצן	pip	גפניים	Vitaceae	7	1	8	8	2
SVT-75	Shivta	Tepper, Bar-Oz and Gini	Daniel Fuks	2016-2020	K	156	1594	5	בלתי						3				2		?קליפת רימון
SVT-75	Shivta	Tepper, Bar-Oz and Gini	Daniel Fuks	2016-2020	K	156	1594	6	גפן	Vitis vinifera	עוקץ	pedicel	גפניים	Vitaceae	1		1	1	2
SVT-75	Shivta	Tepper, Bar-Oz and Gini	Daniel Fuks	2016-2020	K	156	1594	7	?חלקי שדרה-חיטה						2		2	2	2
SVT-75	Shivta	Tepper, Bar-Oz and Gini	Daniel Fuks	2016-2020	K	156	1594	8	?חלקי שדרה-שעורה						2		2	2	2
SVT-75	Shivta	Tepper, Bar-Oz and Gini	Daniel Fuks	2016-2020	K	156	1594	9	חלק שדרה בגלל						1		1	1	2
SVT-75	Shivta	Tepper, Bar-Oz and Gini	Daniel Fuks	2016-2020	K	156	1594	10			פרק גבעול	culm node	Gramineae	דגניים	17	3	20	20	2
SVT-75	Shivta	Tepper, Bar-Oz and Gini	Daniel Fuks	2016-2020	K	156	1594	11	שורשי דגן						7		7	7	2
SVT-75	Shivta	Tepper, Bar-Oz and Gini	Daniel Fuks	2016-2020	K	156	1594	12	שברי דגן								0	0	2
SVT-75	Shivta	Tepper, Bar-Oz and Gini	Daniel Fuks	2016-2020	K	156	1594	13	אמיך קוצני	Emex spinosa	פרי	fruit	ארכוביתיים	Polygonaceae	4		4	4	2
SVT-75	Shivta	Tepper, Bar-Oz and Gini	Daniel Fuks	2016-2020	K	156	1594	14	דגני להגדרה						1		1	1	2
SVT-75	Shivta	Tepper, Bar-Oz and Gini	Daniel Fuks	2016-2020	K	156	1594	15	?אפון						1		1	1	2
SVT-75	Shivta	Tepper, Bar-Oz and Gini	Daniel Fuks	2016-2020	K	156	1594	16	cf. בקיית הכרשינה	cf. Vicia ervilia	זרע	seed	פרפרניים	Fabaceae	1		1	1	2		אפשר לספור עם הכרשינה
SVT-75	Shivta	Tepper, Bar-Oz and Gini	Daniel Fuks	2016-2020	K	156	1594	17	בקיים						4		4	4	2
SVT-75	Shivta	Tepper, Bar-Oz and Gini	Daniel Fuks	2016-2020	K	156	1594	18	?טופח						1		1	1	2
SVT-75	Shivta	Tepper, Bar-Oz and Gini	Daniel Fuks	2016-2020	K	156	1594	19	?אשל? סלקי מדברי						1		1	1	2
SVT-75	Shivta	Tepper, Bar-Oz and Gini	Daniel Fuks	2016-2020	K	156	1594	20	רצנטי	Koelruteria paniculata	זרע	seed		רצנטי	1		1	1	2		רצנטי
SVT-75	Shivta	Tepper, Bar-Oz and Gini	Daniel Fuks	2016-2020	K	156	1594	21	בלתי						1		1	1	2
SVT-75	Shivta	Tepper, Bar-Oz and Gini	Daniel Fuks	2016-2020	K	156	1594	22	זמזומית?				שושניים		1		1	1	2		להגדרה
SVT-75	Shivta	Tepper, Bar-Oz and Gini	Daniel Fuks	2016-2020	K	156	1594	23	בלתי						1		1	1	2
SVT-75	Shivta	Tepper, Bar-Oz and Gini	Daniel Fuks	2016-2020	K	156	1594	24	בלתי						1		1	1	2
SVT-75	Shivta	Tepper, Bar-Oz and Gini	Daniel Fuks	2016-2020	K	156	1594	25	?בלתי-ציפה								0	0	2
SVT-75	Shivta	Tepper, Bar-Oz and Gini	Daniel Fuks	2016-2020	K	156	1594	26	בלתי								0	0	2
SVT-75	Shivta	Tepper, Bar-Oz and Gini	Daniel Fuks	2016-2020	K	156	1594	27	בלתי		זרע	seed	פרפרניים	Fabaceae			0	0	2		אולי יתחבר ל-SVT-72-27
SVT-75	Shivta	Tepper, Bar-Oz and Gini	Daniel Fuks	2016-2020	K	156	1594	28	נונאה/בטנונית								0	0	2
SVT-75	Shivta	Tepper, Bar-Oz and Gini	Daniel Fuks	2016-2020	K	156	1594	29	גללים								0	0	2
SVT-75	Shivta	Tepper, Bar-Oz and Gini	Daniel Fuks	2016-2020	K	156	1594	30	גללי מכרסם								0	0	2	שתי מבחנות
SVT-75	Shivta	Tepper, Bar-Oz and Gini	Daniel Fuks	2016-2020	K	156	1594	31	בקיים		פסיגים	cotyledon and	Fabaceae	פרפרניים		3	3	3			כרשינה, אולי טופח
SVT-75	Shivta	Tepper, Bar-Oz and Gini	Daniel Fuks	2016-2020	K	156	1594	32	בקיית הכרשינה	Vicia ervilia	זרע	seed	פרפרניים	Fabaceae		1	1	1			אפשר לספור עם הכרשינה
SVT-75	Shivta	Tepper, Bar-Oz and Gini	Daniel Fuks	2016-2020	K	156	1594	33	שקד מצוי	Prunus amygdala	קליפה	peel	ורדיים	Rosaceae			1	1
SVT-75	Shivta	Tepper, Bar-Oz and Gini	Daniel Fuks	2016-2020	K	156	1594	34	?שושניים							1	1	1
SVT-75	Shivta	Tepper, Bar-Oz and Gini	Daniel Fuks	2016-2020	K	156	1594	35	בלתי							1	1	1
SVT-75	Shivta	Tepper, Bar-Oz and Gini	Daniel Fuks	2016-2020	K	156	1594	36	חרק מפוחם							1	1	1
SVT-75	Shivta	Tepper, Bar-Oz and Gini	Daniel Fuks	2016-2020	K	156	1594	37	בלתי								0	0
SVT-76	Shivta	Tepper, Bar-Oz and Gini	Daniel Fuks	2016-2020	K	157	1607	1	שעורה תרבותית	Hordeum vulgare	גרגיר	grain	דגניים	Gramineae	66	11	77	77	2	ייתכן בלבול עם 77
SVT-76	Shivta	Tepper, Bar-Oz and Gini	Daniel Fuks	2016-2020	K	157	1607	2	חיטה	Triticum sp.	גרגיר	grain	דגניים	Gramineae	24	8	32	32	2	ייתכן בלבול עם 77
SVT-76	Shivta	Tepper, Bar-Oz and Gini	Daniel Fuks	2016-2020	K	157	1607	3	חיטה/שעורה	Hordeum/Triticum	גרגיר	grain	דגניים	Gramineae	13	7	20	20	2	ייתכן בלבול עם 77
SVT-76	Shivta	Tepper, Bar-Oz and Gini	Daniel Fuks	2016-2020	K	157	1607	4	גפן	Vitis vinifera	חרצן	pip	גפניים	Vitaceae	1		1	1	2
SVT-76	Shivta	Tepper, Bar-Oz and Gini	Daniel Fuks	2016-2020	K	157	1607	5	בקיי עדשתי להגדרה						1		1	1	2
SVT-76	Shivta	Tepper, Bar-Oz and Gini	Daniel Fuks	2016-2020	K	157	1607	6	דגני להגדרה						1		1	1	2
SVT-76	Shivta	Tepper, Bar-Oz and Gini	Daniel Fuks	2016-2020	K	157	1607	7	בקיי	Vicieae	זרע	seed	פרפרניים	Fabaceae	2		2	2	2		אפון?? אולי יהיה אפשר לחבר בהמשך
SVT-76	Shivta	Tepper, Bar-Oz and Gini	Daniel Fuks	2016-2020	K	157	1607	8	??דבקה						1		1	1	2
SVT-76	Shivta	Tepper, Bar-Oz and Gini	Daniel Fuks	2016-2020	K	157	1607	9	?בקיי						1		1	1	2
SVT-76	Shivta	Tepper, Bar-Oz and Gini	Daniel Fuks	2016-2020	K	157	1607	10	שורשי דגן						11		11	11	2
SVT-76	Shivta	Tepper, Bar-Oz and Gini	Daniel Fuks	2016-2020	K	157	1607	11	חלקי שדרה						5		5	5	2
SVT-76	Shivta	Tepper, Bar-Oz and Gini	Daniel Fuks	2016-2020	K	157	1607	12	פרקי דגן						48		48	48	2
SVT-76	Shivta	Tepper, Bar-Oz and Gini	Daniel Fuks	2016-2020	K	157	1607	13	חלקי שדרה								0	0	2
SVT-76	Shivta	Tepper, Bar-Oz and Gini	Daniel Fuks	2016-2020	K	157	1607	14	שברי דגן						4		4	4	2
SVT-76	Shivta	Tepper, Bar-Oz and Gini	Daniel Fuks	2016-2020	K	157	1607	15	תמר מצוי	Phoenix dactylifera	שבר גלעין	stone fragment	דקליים	Palmae	2	6	1	1	2	ייתכן בלבול עם 77
SVT-76	Shivta	Tepper, Bar-Oz and Gini	Daniel Fuks	2016-2020	K	157	1607	16	?תפרחת מורכבים								0	0	2
SVT-76	Shivta	Tepper, Bar-Oz and Gini	Daniel Fuks	2016-2020	K	157	1607	17	גלל								0	0	2	מעניין
SVT-76	Shivta	Tepper, Bar-Oz and Gini	Daniel Fuks	2016-2020	K	157	1607	18	?בלתי-ציפה								0	0	2
SVT-76	Shivta	Tepper, Bar-Oz and Gini	Daniel Fuks	2016-2020	K	157	1607	19	בלתי								0	0	2
SVT-76	Shivta	Tepper, Bar-Oz and Gini	Daniel Fuks	2016-2020	K	157	1607	20	?גלל מכרסם								0	0	2
SVT-76	Shivta	Tepper, Bar-Oz and Gini	Daniel Fuks	2016-2020	K	157	1607	21	גללי צאן								0	0	2
SVT-76	Shivta	Tepper, Bar-Oz and Gini	Daniel Fuks	2016-2020	K	157	1607	22	בלתי-לא להתעסק								0	0		ייתכן בלבול עם 77
SVT-76	Shivta	Tepper, Bar-Oz and Gini	Daniel Fuks	2016-2020	K	157	1607	23	תמר מצוי	Phoenix dactylifera	שבר גלעין	stone fragment	דקליים	Palmae
SVT-76	Shivta	Tepper, Bar-Oz and Gini	Daniel Fuks	2016-2020	K	157	1607	24			פרק ציר שיבולת	rachis fragment	Gramineae	דגניים			0	0
SVT-76	Shivta	Tepper, Bar-Oz and Gini	Daniel Fuks	2016-2020	K	157	1607	25	בקיי	Vicieae	זרע	seed	Fabaceae	פרפרניים		1	1	1			לא להתעסק
SVT-76	Shivta	Tepper, Bar-Oz and Gini	Daniel Fuks	2016-2020	K	157	1607	26	?להגדרה							1	1	1
SVT-77	Shivta	Tepper, Bar-Oz and Gini	Daniel Fuks	2016-2020	K	158	1618	1	שעורה תרבותית	Hordeum vulgare	גרגיר	grain	Gramineae	דגניים	94	6+1	101	94	2	ייתכן בלבול עם 76
SVT-77	Shivta	Tepper, Bar-Oz and Gini	Daniel Fuks	2016-2020	K	158	1618	2	חיטה	Triticum sp.	גרגיר	grain	דגניים	Gramineae	29	8	37	37	2	ייתכן בלבול עם 76
SVT-77	Shivta	Tepper, Bar-Oz and Gini	Daniel Fuks	2016-2020	K	158	1618	3	חיטה/שעורה	Hordeum/Triticum	גרגיר	grain	דגניים	Gramineae	26	14	40	40	2	ייתכן בלבול עם 76
SVT-77	Shivta	Tepper, Bar-Oz and Gini	Daniel Fuks	2016-2020	K	158	1618	4	גפן	Vitis vinifera	חרצן	pip	גפניים	Vitaceae	2	2	4	4	2	ייתכן בלבול עם 76
SVT-77	Shivta	Tepper, Bar-Oz and Gini	Daniel Fuks	2016-2020	K	158	1618	5	שורשי דגן						8		8	8	2
SVT-77	Shivta	Tepper, Bar-Oz and Gini	Daniel Fuks	2016-2020	K	158	1618	6	פרקי דגן						12	2	14	14	2
SVT-77	Shivta	Tepper, Bar-Oz and Gini	Daniel Fuks	2016-2020	K	158	1618	7			פרק ציר שיבולת	rachis fragment	Gramineae	דגניים	1		1	1	2
SVT-77	Shivta	Tepper, Bar-Oz and Gini	Daniel Fuks	2016-2020	K	158	1618	8			פרק ציר שיבולת	rachis fragment	Gramineae	דגניים	1		1	1	2
SVT-77	Shivta	Tepper, Bar-Oz and Gini	Daniel Fuks	2016-2020	K	158	1618	9			פרק ציר שיבולת	rachis fragment	Gramineae	דגניים	1		1	1	2
SVT-77	Shivta	Tepper, Bar-Oz and Gini	Daniel Fuks	2016-2020	K	158	1618	10	cf. רימון מצוי	cf. Punica granatum	שבר קליפה	rind fragment			1		1	1	2
SVT-77	Shivta	Tepper, Bar-Oz and Gini	Daniel Fuks	2016-2020	K	158	1618	11	טופח ספרדי	Lathyrus clymenum	זרע	seed	פרפרניים	Fabaceae	1		1	1	2
SVT-77	Shivta	Tepper, Bar-Oz and Gini	Daniel Fuks	2016-2020	K	158	1618	12	?גלומה						1		1	1	2
SVT-77	Shivta	Tepper, Bar-Oz and Gini	Daniel Fuks	2016-2020	K	158	1618	13	שברי דגן								0	0	2
SVT-77	Shivta	Tepper, Bar-Oz and Gini	Daniel Fuks	2016-2020	K	158	1618	14	?יפרוק? חמך						2		2	2	2
SVT-77	Shivta	Tepper, Bar-Oz and Gini	Daniel Fuks	2016-2020	K	158	1618	15	בלתי						1		1	1	2
SVT-77	Shivta	Tepper, Bar-Oz and Gini	Daniel Fuks	2016-2020	K	158	1618	16	בלתי						1		1	1	2
SVT-77	Shivta	Tepper, Bar-Oz and Gini	Daniel Fuks	2016-2020	K	158	1618	17	?גלל?ציפה								0	0	2
SVT-77	Shivta	Tepper, Bar-Oz and Gini	Daniel Fuks	2016-2020	K	158	1618	18	?גלל								0	0	2
SVT-77	Shivta	Tepper, Bar-Oz and Gini	Daniel Fuks	2016-2020	K	158	1618	19	?גללי מכרסם								0	0	2
SVT-77	Shivta	Tepper, Bar-Oz and Gini	Daniel Fuks	2016-2020	K	158	1618	20	גללי צאן							1	1	1	2
SVT-77	Shivta	Tepper, Bar-Oz and Gini	Daniel Fuks	2016-2020	K	158	1618	21	?בקיי							1	1	1		ייתכן בלבול עם 76	לא להתעסק
SVT-77	Shivta	Tepper, Bar-Oz and Gini	Daniel Fuks	2016-2020	K	158	1618	22	בקיי	Vicieae	זרע	seed	Fabaceae	פרפרניים			0	0		ייתכן בלבול עם 76	אול טופח ספרדי אך שרוף מדיי להגדיר או לחבר
SVT-77	Shivta	Tepper, Bar-Oz and Gini	Daniel Fuks	2016-2020	K	158	1618	23	תמר מצוי	Phoenix dactylifera	שבר גלעין	stone fragment	Palmae?	דקליים?			0	0
SVT-77	Shivta	Tepper, Bar-Oz and Gini	Daniel Fuks	2016-2020	K	158	1618	24	בלתי								0	0
SVT-77	Shivta	Tepper, Bar-Oz and Gini	Daniel Fuks	2016-2020	K	158	1618	25	בלתי -שונות							1	1	1
SVT-78	Shivta	Tepper, Bar-Oz and Gini	Daniel Fuks	2016-2020	K	159	1619	1	שעורה תרבותית	Hordeum vulgare	גרגיר	grain	Gramineae	דגניים	59	9	68	68	2
SVT-78	Shivta	Tepper, Bar-Oz and Gini	Daniel Fuks	2016-2020	K	159	1619	2	חיטה	Triticum sp.	גרגיר	grain	דגניים	Gramineae	15		15	15	2
SVT-78	Shivta	Tepper, Bar-Oz and Gini	Daniel Fuks	2016-2020	K	159	1619	3	חיטה/שעורה	Hordeum/Triticum	גרגיר	grain	דגניים	Gramineae	5	8	13	13	2
SVT-78	Shivta	Tepper, Bar-Oz and Gini	Daniel Fuks	2016-2020	K	159	1619	4	גפן	Vitis vinifera	חרצן	pip	גפניים	Vitaceae	6	3	9	9	2
SVT-78	Shivta	Tepper, Bar-Oz and Gini	Daniel Fuks	2016-2020	K	159	1619	5	?שעורה						2		2	2	2
SVT-78	Shivta	Tepper, Bar-Oz and Gini	Daniel Fuks	2016-2020	K	159	1619	6	בקיי	Vicieae	זרע	seed	Fabaceae	פרפרניים	1		1	1	2		כנראה כרשינה
SVT-78	Shivta	Tepper, Bar-Oz and Gini	Daniel Fuks	2016-2020	K	159	1619	7	בקיים		פסיגים	cotyledon	Fabaceae	פרפרניים	3		3	3	2
SVT-78	Shivta	Tepper, Bar-Oz and Gini	Daniel Fuks	2016-2020	K	159	1619	8	שעורה עם נובר בפנים		גרגיר עם נובר בפנים				1		1	1	2
SVT-78	Shivta	Tepper, Bar-Oz and Gini	Daniel Fuks	2016-2020	K	159	1619	9	זרע בגלל לצילום						1		1	1	2
SVT-78	Shivta	Tepper, Bar-Oz and Gini	Daniel Fuks	2016-2020	K	159	1619	10	בלתי								0	0	2
SVT-78	Shivta	Tepper, Bar-Oz and Gini	Daniel Fuks	2016-2020	K	159	1619	11			פרק גבעול	culm node	Gramineae	דגניים	19		19	19	2
SVT-78	Shivta	Tepper, Bar-Oz and Gini	Daniel Fuks	2016-2020	K	159	1619	12			פרק ציר שיבולת	rachis fragment	Gramineae	דגניים	6	1	7	7	2
SVT-78	Shivta	Tepper, Bar-Oz and Gini	Daniel Fuks	2016-2020	K	159	1619	13	שורשי דגן						4		4	4	2
SVT-78	Shivta	Tepper, Bar-Oz and Gini	Daniel Fuks	2016-2020	K	159	1619	14	שברי דגן								0	0	2
SVT-78	Shivta	Tepper, Bar-Oz and Gini	Daniel Fuks	2016-2020	K	159	1619	15	שבר גלומה						1		1	1	2
SVT-78	Shivta	Tepper, Bar-Oz and Gini	Daniel Fuks	2016-2020	K	159	1619	16	גפן	Vitis vinifera	זג	exocarp	גפניים	Vitaceae			0	0	2
SVT-78	Shivta	Tepper, Bar-Oz and Gini	Daniel Fuks	2016-2020	K	159	1619	17	גפן	Vitis vinifera	זג	exocarp	גפניים	Vitaceae			0	0	2
SVT-78	Shivta	Tepper, Bar-Oz and Gini	Daniel Fuks	2016-2020	K	159	1619	18	?קליפת רימון								0	0	2
SVT-78	Shivta	Tepper, Bar-Oz and Gini	Daniel Fuks	2016-2020	K	159	1619	19	בלתי								0	0	2
SVT-78	Shivta	Tepper, Bar-Oz and Gini	Daniel Fuks	2016-2020	K	159	1619	20	?ציפה								0	0	2
SVT-78	Shivta	Tepper, Bar-Oz and Gini	Daniel Fuks	2016-2020	K	159	1619	21	גללי צאן								0	0	2
SVT-78	Shivta	Tepper, Bar-Oz and Gini	Daniel Fuks	2016-2020	K	159	1619	22	גללי מכרסם								0	0	2
SVT-78	Shivta	Tepper, Bar-Oz and Gini	Daniel Fuks	2016-2020	K	159	1619	23	בלתי								0	0	2
SVT-78	Shivta	Tepper, Bar-Oz and Gini	Daniel Fuks	2016-2020	K	159	1619	24	זון להגדרה		גלומה						0	0	2
SVT-78	Shivta	Tepper, Bar-Oz and Gini	Daniel Fuks	2016-2020	K	159	1619	25	בלתי								0	0	2
SVT-78	Shivta	Tepper, Bar-Oz and Gini	Daniel Fuks	2016-2020	K	159	1619	26	אמיך קוצני	Emex spinosa	פרי	fruit	ארכוביתיים	Polygonaceae		1	1	1
SVT-78	Shivta	Tepper, Bar-Oz and Gini	Daniel Fuks	2016-2020	K	159	1619	27	מוץ								0	0
SVT-78	Shivta	Tepper, Bar-Oz and Gini	Daniel Fuks	2016-2020	K	159	1619	28	תמר		שבר גלעין	stone fragment	Palmae	דקליים		1	1	1
[truncated: 987 more rows]

## Sheet: שטח O
Lab #	Site	Excavator	Archaeobotanist	Year analyzed	Area	Locus	Basket	Vial no.	מין הצמח	Plant Latin name	איבר	Organ	Family	משפחה	Light Fraction -כמות	Heavy Fraction - כמות	Calculated quantity	Quantity	Fraction Size	Notes
[truncated: 395 more rows]

[truncated: 3 more sheets: שטח P, גללים, סינון רטוב וגס]
