# Supplementary material for: Unprecedented yet gradual nature of first millennium CE intercontinental crop plant dispersal revealed in ancient Negev desert refuse
Source: eLife. 2023 Nov 27;12:e85118. doi: 10.7554/eLife.85118 (PMC10846859; doi:10.7554/eLife.85118)
Supplement: Table 4—source data 3. [file elife-85118-table4-data3.xlsx]

## Sheet: שטח A
Lab #	Site	Excavator	Archaeobotanist	Year analyzed	Area	Locus	Basket	Sediment Volume (liter)	Flotation (Light/Heavy/Dry Sift)	Fraction size (mm)	Vial no.	מין הצמח	Plant Latin name	איבר	Organ	משפחה	Family	Calculated quantity	Quantity	Notes
NZN-1	Nitzana	Tepper and Bar-Oz	דניאל	2017	A	101	1018-1	3	Light Fraction	2	1	שעורה	Hordeum	גרגיר	grain	דגניים	Gramineae	2	2
NZN-1	Nitzana	Tepper and Bar-Oz	דניאל	2017	A	101	1018-1	3	Light Fraction	2	2	חיטה	Triticum	גרגיר	grain	דגניים	Gramineae	2	2
NZN-1	Nitzana	Tepper and Bar-Oz	דניאל	2017	A	101	1018-1	3	Light Fraction	2	3	גפן	Vitis vinifera	חרצן	pip	גפניים	Vitaceae	2	2
NZN-1	Nitzana	Tepper and Bar-Oz	דניאל	2017	A	101	1018-1	3	Light Fraction	2	4	גפן	Vitis vinifera	עוקץ וזג	grapeskin and pedicel	גפניים	Vitaceae	3	1 + 2	שני עוקצים וזג. באחד העוקצים גם דבוק זג
NZN-1	Nitzana	Tepper and Bar-Oz	דניאל	2017	A	101	1018-1	3	Light Fraction	2	5			מלען	awn	דגניים	Gramineae	1	1
NZN-1	Nitzana	Tepper and Bar-Oz	דניאל	2017	A	101	1018-1	3	Light Fraction	2	6			חלקי שדרה	rachis fragments	דגניים	Gramineae	2	2	אחד של שעורה 6-טורית
NZN-1	Nitzana	Tepper and Bar-Oz	דניאל	2017	A	101	1018-1	3	Light Fraction	2	7			פרקי גבעול	culm nodes	דגניים	Gramineae	11	11	ספירה לפי MNI
NZN-1	Nitzana	Tepper and Bar-Oz	דניאל	2017	A	101	1018-1	3	Light Fraction	2	8	בלתי-שונות								כנראה אין כאן זרעים
NZN-2	Nitzana	Tepper and Bar-Oz	דניאל	2017	A	101	1018-1	3	Heavy Residue	2	1	שעורה	Hordeum	גרגיר	grain	דגניים	Gramineae	2	2
NZN-2	Nitzana	Tepper and Bar-Oz	דניאל	2017	A	101	1018-1	3	Heavy Residue	2	2	חיטה/שעורה	Hordeum/Triticum	גרגיר	grain	דגניים	Gramineae	1	1
NZN-3	Nitzana	Tepper and Bar-Oz	דניאל	2017	A	101	1031-1	3	Light Fraction	2	1	שעורה	Hordeum	גרגיר	grain	דגניים	Gramineae	6	6
NZN-3	Nitzana	Tepper and Bar-Oz	דניאל	2017	A	101	1031-1	3	Light Fraction	2	2	חיטה	Triticum	גרגיר	grain	דגניים	Gramineae	1	1
NZN-3	Nitzana	Tepper and Bar-Oz	דניאל	2017	A	101	1031-1	3	Light Fraction	2	3	חיטה/שעורה	Hordeum/Triticum	גרגיר	grain	דגניים	Gramineae	1	1
NZN-3	Nitzana	Tepper and Bar-Oz	דניאל	2017	A	101	1031-1	3	Light Fraction	2	4			פרקי גבעול	culm nodes	דגניים	Gramineae	3	3
NZN-3	Nitzana	Tepper and Bar-Oz	דניאל	2017	A	101	1031-1	3	Light Fraction	2	5	רימון מצוי	Punica granatum	זרע	seed	רימוניים	Lythraceae	1	1
NZN-3	Nitzana	Tepper and Bar-Oz	דניאל	2017	A	101	1031-1	3	Light Fraction	2	6	בלתי						1	1	יואל: נראה חתיכת עץ בקצה
NZN-3	Nitzana	Tepper and Bar-Oz	דניאל	2017	A	101	1031-1	3	Light Fraction	2	7	בלתי						1	1	יואל: אולי בקבוקון מקומט, לחכות
NZN-3	Nitzana	Tepper and Bar-Oz	דניאל	2017	A	101	1031-1	3	Light Fraction	2	8	בלתי-שונות						3	3	כולל גלל
NZN-4	Nitzana	Tepper and Bar-Oz	דניאל	2017	A	101	1031-1	3	Heavy Residue	2	1	שעורה	Hordeum	גרגיר	grain	דגניים	Gramineae	1	1
NZN-4	Nitzana	Tepper and Bar-Oz	דניאל	2017	A	101	1031-1	3	Heavy Residue	2	2	חיטה	Triticum	גרגיר	grain	דגניים	Gramineae	2	2
NZN-4	Nitzana	Tepper and Bar-Oz	דניאל	2017	A	101	1031-1	3	Heavy Residue	2	3	גפן	Vitis vinifera	חרצן	pip	גפניים	Vitaceae	1	1
NZN-4	Nitzana	Tepper and Bar-Oz	דניאל	2017	A	101	1031-1	3	Heavy Residue	2	4	עדשה?	Lens culinaris	פסיג	cotyledon	פרפרניים	Fabaceae	1	1
NZN-5	Nitzana	Tepper and Bar-Oz	דניאל	2017	A	101	1068-3	3	Light Fraction	2	1	שעורה	Hordeum	גרגיר	grain	דגניים	Gramineae	3	3
NZN-5	Nitzana	Tepper and Bar-Oz	דניאל	2017	A	101	1068-3	3	Light Fraction	2	2	חיטה	Triticum	גרגיר	grain	דגניים	Gramineae	1	1
NZN-5	Nitzana	Tepper and Bar-Oz	דניאל	2017	A	101	1068-3	3	Light Fraction	2	3	חיטה/שעורה	Hordeum/Triticum	גרגיר	grain	דגניים	Gramineae	1	1
NZN-5	Nitzana	Tepper and Bar-Oz	דניאל	2017	A	101	1068-3	3	Light Fraction	2	4			פרקי גבעול	culm nodes	דגניים	Gramineae	4	4	שניים לא מפוחמים
NZN-5	Nitzana	Tepper and Bar-Oz	דניאל	2017	A	101	1068-3	3	Light Fraction	2	5	בקיים		פסיג	cotyledon	פרפרניים	Fabaceae	1	1
NZN-5	Nitzana	Tepper and Bar-Oz	דניאל	2017	A	101	1068-3	3	Light Fraction	2	6	בלתי		בסיס של יחידת הפצה				1	1	לא מתאים ליחידת הפצה של בסיה (סלקיים) ולא של כוכבן (מצליבים)
NZN-5	Nitzana	Tepper and Bar-Oz	דניאל	2017	A	101	1068-3	3	Light Fraction	2	7	בלתי		ציפה עם זרע				1	1	ציפה עם זרע
NZN-5	Nitzana	Tepper and Bar-Oz	דניאל	2017	A	101	1068-3	3	Light Fraction	2	8	בלתי-שונות						9	9	כולל גלל לא מפוחם עם מוץ? וגבעול מוכר
NZN-6	Nitzana	Tepper and Bar-Oz	דניאל	2017	A	101	1068-3	3	Heavy Residue	2	1	שעורה	Hordeum	גרגיר	grain	דגניים	Gramineae	2	2
NZN-6	Nitzana	Tepper and Bar-Oz	דניאל	2017	A	101	1068-3	3	Heavy Residue	2	2	חיטה	Triticum	גרגיר	grain	דגניים	Gramineae	2	2
NZN-6	Nitzana	Tepper and Bar-Oz	דניאל	2017	A	101	1068-3	3	Heavy Residue	2	3	גפן	Vitis vinifera	שבר חרצן	pip fragment	גפניים	Vitaceae
NZN-6	Nitzana	Tepper and Bar-Oz	דניאל	2017	A	101	1068-3	3	Heavy Residue	2	4	בקיית הכרשינה	Vicia ervilia	זרע	seed	פרפרניים	Fabaceae	1	1
NZN-6	Nitzana	Tepper and Bar-Oz	דניאל	2017	A	101	1068-3	3	Heavy Residue	2	5	בקיים?		פסיג	cotyledon	פרפרניים	Fabaceae	1	1
NZN-6	Nitzana	Tepper and Bar-Oz	דניאל	2017	A	101	1068-3	3	Heavy Residue	2	6	זית	Olea europaea	שבר	fragment	זיתיים	Oleaceae	1	1
NZN-6	Nitzana	Tepper and Bar-Oz	דניאל	2017	A	101	1068-3	3	Heavy Residue	2	7	בלתי-שונות						2	2
NZN-6	Nitzana	Tepper and Bar-Oz	דניאל	2017	A	101	1068-3	3	Heavy Residue	2	8	גלל		שבר
NZN-7	Nitzana	Tepper and Bar-Oz	דניאל	2017	A	102	1072-1	3	Light Fraction	2	1	שעורה	Hordeum	גרגיר	grain	דגניים	Gramineae	3	3
NZN-7	Nitzana	Tepper and Bar-Oz	דניאל	2017	A	102	1072-1	3	Light Fraction	2	2	חיטה	Triticum	גרגיר	grain	דגניים	Gramineae	5	5
NZN-7	Nitzana	Tepper and Bar-Oz	דניאל	2017	A	102	1072-1	3	Light Fraction	2	3	חיטה/שעורה	Hordeum/Triticum	גרגיר	grain	דגניים	Gramineae	1	1	יש עוד 2 שברים
NZN-7	Nitzana	Tepper and Bar-Oz	דניאל	2017	A	102	1072-1	3	Light Fraction	2	4	גפן	Vitis vinifera	חרצן	pip	גפניים	Vitaceae	11	11	צבע חום, לא הכל מפוחם אך פריך	מועמד לפטריות
NZN-7	Nitzana	Tepper and Bar-Oz	דניאל	2017	A	102	1072-1	3	Light Fraction	2	5	בקיים		זרע ושבר	seed and fragment	פרפרניים	Fabaceae	1	1
NZN-7	Nitzana	Tepper and Bar-Oz	דניאל	2017	A	102	1072-1	3	Light Fraction	2	6	חיטה טטרפלוידית	Triticum turgidum s.l.	פרק ציר שיבולת	rachis fragments	דגניים	Gramineae	2	2
NZN-7	Nitzana	Tepper and Bar-Oz	דניאל	2017	A	102	1072-1	3	Light Fraction	2	7	בלתי		קליפת זרע	seed coat	דגניים	Gramineae	1	1
NZN-7	Nitzana	Tepper and Bar-Oz	דניאל	2017	A	102	1072-1	3	Light Fraction	2	8	אפרסק	Prunus persica	שבר קליפת הזרע	seed coat fragment	ורדניים	Rosaceae			לבדוק בהמשך
NZN-7	Nitzana	Tepper and Bar-Oz	דניאל	2017	A	102	1072-1	3	Light Fraction	2	9	זית	Olea europaea	שבר קליפת הזרע	seed coat fragment	זיתיים	Oleaceae	1	1
NZN-7	Nitzana	Tepper and Bar-Oz	דניאל	2017	A	102	1072-1	3	Light Fraction	2	10	אורן הצנובר	Pinus pinea	שבר קליפת הזרע
NZN-7	Nitzana	Tepper and Bar-Oz	דניאל	2017	A	102	1072-1	3	Light Fraction	2	11	רימון מצוי	Punica granatum	זרע	seed	רימוניים	Lythraceae	1	1
NZN-7	Nitzana	Tepper and Bar-Oz	דניאל	2017	A	102	1072-1	3	Light Fraction	2	12	Salsoleae	Salsoleae	פרק גבעול	stem segment	סלקיים	Chenopodiaceae	1	1	להגדיר
NZN-7	Nitzana	Tepper and Bar-Oz	דניאל	2017	A	102	1072-1	3	Light Fraction	2	13	רימון מצוי	Punica granatum	שבר קליפת הפרי	peel fragment	רימוניים	Lythraceae	1	1
NZN-7	Nitzana	Tepper and Bar-Oz	דניאל	2017	A	102	1072-1	3	Light Fraction	2	14	גפן	Vitis vinifera	עוקץ	pedicel	גפניים	Vitaceae	1	1
NZN-7	Nitzana	Tepper and Bar-Oz	דניאל	2017	A	102	1072-1	3	Light Fraction	2	15			פרק גבעול	culm node	דגניים	Gramineae	7	7	כולל אחד שורש
NZN-7	Nitzana	Tepper and Bar-Oz	דניאל	2017	A	102	1072-1	3	Light Fraction	2	16	חציל	Solanum melongena	זרע	seed	סולניים	Solanaceae	3	3	מוגדר, מחכים לאישור סופי בהחלט של יואל
NZN-7	Nitzana	Tepper and Bar-Oz	דניאל	2017	A	102	1072-1	3	Light Fraction	2	17	בלתי-קליפות		קליפות	peel/bark
NZN-7	Nitzana	Tepper and Bar-Oz	דניאל	2017	A	102	1072-1	3	Light Fraction	2	18	בלתי-שונות
NZN-7	Nitzana	Tepper and Bar-Oz	דניאל	2017	A	102	1072-1	3	Light Fraction	2	19	בלתי-זרדים
NZN-7	Nitzana	Tepper and Bar-Oz	דניאל	2017	A	102	1072-1	3	Light Fraction	2	20	גללים ושיער								כולל לא מפוחם
NZN-7	Nitzana	Tepper and Bar-Oz	דניאל	2017	A	102	1072-1	3	Light Fraction	1	21	גפן	Vitis vinifera	חרצן ושבר חרצן	pip and pip fragment	גפניים	Vitaceae	8	8	MNI, כולל 7 עוקצי חרצן וחרצן אחד שלם, ועוד 3 אנדוספרם ושברי קליפה רבים
NZN-7	Nitzana	Tepper and Bar-Oz	דניאל	2017	A	102	1072-1	3	Light Fraction	1	22	גפן	Vitis vinifera	עוקץ	pedicel	גפניים	Vitaceae	38	38
NZN-7	Nitzana	Tepper and Bar-Oz	דניאל	2017	A	102	1072-1	3	Light Fraction	1	23	שעורה שש-טורית	Hordeum vulgare subsp. hexastichum	פרק ציר שיבולת	rachis fragments	דגניים	Gramineae	7	7
NZN-7	Nitzana	Tepper and Bar-Oz	דניאל	2017	A	102	1072-1	3	Light Fraction	1	24	?שעורה שש-טורית	cf. Hordeum vulgare subsp. hexastichum	פרק ציר שיבולת	rachis fragments	דגניים	Gramineae	1	1
NZN-7	Nitzana	Tepper and Bar-Oz	דניאל	2017	A	102	1072-1	3	Light Fraction	1	25	שעורה	Hordeum sp.	פרק ציר שיבולת	rachis fragments	דגניים	Gramineae	4	4
NZN-7	Nitzana	Tepper and Bar-Oz	דניאל	2017	A	102	1072-1	3	Light Fraction	1	26	חיטה טטרפלוידית	Triticum turgidum s.l.	פרק ציר שיבולת	rachis fragments	דגניים	Gramineae	35	35
NZN-7	Nitzana	Tepper and Bar-Oz	דניאל	2017	A	102	1072-1	3	Light Fraction	1	27	חיטת הלחם?	cf. Triticum aestivum s.l.	פרק ציר שיבולת עם גלל	rachis fragments	דגניים	Gramineae	1	1
NZN-7	Nitzana	Tepper and Bar-Oz	דניאל	2017	A	102	1072-1	3	Light Fraction	1	28	חיטה עם גלל	Trititicum sp. with dung fragments attached	פרק ציר שיבולת	rachis fragments	דגניים	Gramineae	1	1	two segments on one piece
NZN-7	Nitzana	Tepper and Bar-Oz	דניאל	2017	A	102	1072-1	3	Light Fraction	1	29	חיטה/שעורה	Hordeum/Triticum	פרק ציר שיבולת	rachis fragments	דגניים	Gramineae	7	7
NZN-7	Nitzana	Tepper and Bar-Oz	דניאל	2017	A	102	1072-1	3	Light Fraction	1	30	חיטה/שעורה	Hordeum/Triticum with dung fragments attached	פרק ציר שיבולת עם גלל	rachis fragments	דגניים	Gramineae	4	4
NZN-7	Nitzana	Tepper and Bar-Oz	דניאל	2017	A	102	1072-1	3	Light Fraction	1	31	חיטת הלחם?	cf. Triticum aestivum s.l.	פרק ציר שיבולת קצה	apical rachis fragments	דגניים	Gramineae	1	1
NZN-7	Nitzana	Tepper and Bar-Oz	דניאל	2017	A	102	1072-1	3	Light Fraction	1	32	חיטת הלחם?	cf. Triticum aestivum s.l.	פרק ציר שיבולת	rachis fragments	דגניים	Gramineae	3	3	אודי הגדיר לפי קיום הרכילה
NZN-7	Nitzana	Tepper and Bar-Oz	דניאל	2017	A	102	1072-1	3	Light Fraction	1	33	דגני להגדרה - עוקצר?		גרגיר	grain	דגניים	Gramineae	1	1
NZN-7	Nitzana	Tepper and Bar-Oz	דניאל	2017	A	102	1072-1	3	Light Fraction	1	34	זון אשון/רבשנתי?		גרגיר	grain	דגניים	Gramineae	1	1
NZN-7	Nitzana	Tepper and Bar-Oz	דניאל	2017	A	102	1072-1	3	Light Fraction	1	35			פרקי גבעול	culm nodes	דגניים	Gramineae	16	16
NZN-7	Nitzana	Tepper and Bar-Oz	דניאל	2017	A	102	1072-1	3	Light Fraction	1	36			שרשי דגן	roots	דגניים	Gramineae	2	2
NZN-7	Nitzana	Tepper and Bar-Oz	דניאל	2017	A	102	1072-1	3	Light Fraction	1	37	EMPTY
NZN-7	Nitzana	Tepper and Bar-Oz	דניאל	2017	A	102	1072-1	3	Light Fraction	1	38	מתנן שעיר	Thymelaea hirsuta	אגוזית	nutlet	מתנניים	Thymelaceae	12	12
NZN-7	Nitzana	Tepper and Bar-Oz	דניאל	2017	A	102	1072-1	3	Light Fraction	1	39	מתנן שעיר	Thymelaea hirsuta	עלה	leaf	מתנניים	Thymelaceae	75	75
NZN-7	Nitzana	Tepper and Bar-Oz	דניאל	2017	A	102	1072-1	3	Light Fraction	1	40	מתנן שעיר	Thymelaea hirsuta	קצה ענף עם עלים	branch apex with leaves	מתנניים	Thymelaceae	2	2
NZN-7	Nitzana	Tepper and Bar-Oz	דניאל	2017	A	102	1072-1	3	Light Fraction	1	41	cf. חציל	cf. Solanum melongena	זרע	seed	סולניים	Solanaceae	2	2	מוגדר על בסיס השוואה ל-7-16, מחכים לאישור סופי בהחלט של יואל
NZN-7	Nitzana	Tepper and Bar-Oz	דניאל	2017	A	102	1072-1	3	Light Fraction	1	42	שבר לבן	Peganum harmala	זרע	seed	זוגניים	Zygophyllaceae	4	4
NZN-7	Nitzana	Tepper and Bar-Oz	דניאל	2017	A	102	1072-1	3	Light Fraction	1	43	ארנבית שרועה	Arnebia decumbrens	זרע	seed	זיפניים	Boraginaceae	1	1	להגדיר
NZN-7	Nitzana	Tepper and Bar-Oz	דניאל	2017	A	102	1072-1	3	Light Fraction	1	44	אמיך קוצני	Emex spinosa	פרי	fruit	ארכוביתיים	Polygonaceae	2	2
NZN-7	Nitzana	Tepper and Bar-Oz	דניאל	2017	A	102	1072-1	3	Light Fraction	1	45	עירית צרת-עלים/נבובה	Asphodelus tenuifolius/fistulosus	זרע	seed	עיריתיים	Asphodelaceae	1	1
NZN-7	Nitzana	Tepper and Bar-Oz	דניאל	2017	A	102	1072-1	3	Light Fraction	1	46	עשנן קטן	Fumaria parviflora	פרי	fuit	עשנניים	Fumariaceae	2	2	ES, ME, IA
NZN-7	Nitzana	Tepper and Bar-Oz	דניאל	2017	A	102	1072-1	3	Light Fraction	1	47	בטנונית שעירה	Gastrocotyle hispida	זרע	seed	זיפניים	Boraginaceae	1	1
NZN-7	Nitzana	Tepper and Bar-Oz	דניאל	2017	A	102	1072-1	3	Light Fraction	1	48	חומעה?				ארכוביתיים	Polygonaceae	1	1
NZN-7	Nitzana	Tepper and Bar-Oz		2017	A	102	1072-1	3	Light Fraction	1	49	פרגה?				פרגיים	Papaveraceae	1	1
NZN-7	Nitzana	Tepper and Bar-Oz		2017	A	102	1072-1	3	Light Fraction	1	50	ששן מאפיר?						1	1
NZN-7	Nitzana	Tepper and Bar-Oz		2017	A	102	1072-1	3	Light Fraction	1	51	חלמית קטנת-פרחים/חדת-אונות	Malva parviflora/oxyloba	זרע	seed	חלמיתיים	Malvaceae	5	5
NZN-7	Nitzana	Tepper and Bar-Oz		2017	A	102	1072-1	3	Light Fraction	1	52	חלמית מצרית	Malva aegyptia	זרע	seed	חלמיתיים	Malvaceae	1	1
NZN-7	Nitzana	Tepper and Bar-Oz		2017	A	102	1072-1	3	Light Fraction	1	53	בלתי		גרגיר	grain	דגניים	Gramineae	2	2	לי זה נראה כמו שעורה לא מפוחמת, ליואל אחד נראה כמו סוככי
NZN-7	Nitzana	Tepper and Bar-Oz		2017	A	102	1072-1	3	Light Fraction	1	54	דגני		גרגיר	grain	דגניים	Gramineae	1	1	עוקצר? לא במצב להגדיר
NZN-7	Nitzana	Tepper and Bar-Oz		2017	A	102	1072-1	3	Light Fraction	1	55	שלוחית?						1	1	יואל ראה, צריך לחכות או לפחם שלוחית
NZN-7	Nitzana	Tepper and Bar-Oz		2017	A	102	1072-1	3	Light Fraction	1	56	חבלבל	Convolvulus sp.
NZN-7	Nitzana	Tepper and Bar-Oz		2017	A	102	1072-1	3	Light Fraction	1	57	?גפן	Vitis vinifera?	עוקץ	pedicel	גפניים?	Vitaceae?	1	1	ועוד פרי צעיר
NZN-7	Nitzana	Tepper and Bar-Oz		2017	A	102	1072-1	3	Light Fraction	1	58	בלתי		ענבה כדורית עם קליפה מקומטת				2	2
NZN-7	Nitzana	Tepper and Bar-Oz		2017	A	102	1072-1	3	Light Fraction	1	59	בלתי								נבדק עובר של הרנוגיים
NZN-7	Nitzana	Tepper and Bar-Oz		2017	A	102	1072-1	3	Light Fraction	1	60	תמר??		קליפות						או תמר או שורשים כנראה
NZN-7	Nitzana	Tepper and Bar-Oz		2017	A	102	1072-1	3	Light Fraction	1	61	רצנטי?
NZN-7	Nitzana	Tepper and Bar-Oz		2017	A	102	1072-1	3	Light Fraction	1	62	בלתי-שונות
NZN-7	Nitzana	Tepper and Bar-Oz		2017	A	102	1072-1	3	Light Fraction	1	63	גלל		שברים
NZN-7	Nitzana	Tepper and Bar-Oz		2017	A	102	1072-1	3	Light Fraction	1	64	חרק
NZN-7	Nitzana	Tepper and Bar-Oz		2017	A	102	1072-1	3	Light Fraction	1	65	עצם
NZN-8	Nitzana	Tepper and Bar-Oz	דניאל	2017	A	102	1072-1	3	Heavy Residue	2	1	שעורה	Hordeum	גרגיר	grain	דגניים	Gramineae	1	1
NZN-8	Nitzana	Tepper and Bar-Oz	דניאל	2017	A	102	1072-1	3	Heavy Residue	2	2	גפן	Vitis vinifera	חרצן	pip	גפניים	Vitaceae	1	1
NZN-8	Nitzana	Tepper and Bar-Oz	דניאל	2017	A	102	1072-1	3	Heavy Residue	2	3	בלתי
NZN-9	Nitzana	Tepper and Bar-Oz	דניאל	2017	A	102	1075-1	3	Light Fraction	2	1	שעורה	Hordeum	גרגיר	grain	דגניים	Gramineae	13	13
NZN-9	Nitzana	Tepper and Bar-Oz	דניאל	2017	A	102	1075-1	3	Light Fraction	2	2	חיטה	Triticum	גרגיר	grain	דגניים	Gramineae	5	5
NZN-9	Nitzana	Tepper and Bar-Oz	דניאל	2017	A	102	1075-1	3	Light Fraction	2	3	חיטה/שעורה	Hordeum/Triticum	גרגיר	grain	דגניים	Gramineae	3	3
NZN-9	Nitzana	Tepper and Bar-Oz	דניאל	2017	A	102	1075-1	3	Light Fraction	2	4	גפן	Vitis vinifera	חרצן	pip	גפניים	Vitaceae	1	1
NZN-9	Nitzana	Tepper and Bar-Oz	דניאל	2017	A	102	1075-1	3	Light Fraction	2	5	גפן	Vitis vinifera	עוקץ	pedicel	גפניים	Vitaceae	1	1
NZN-9	Nitzana	Tepper and Bar-Oz	דניאל	2017	A	102	1075-1	3	Light Fraction	2	6	בקיים		זרע	seed	פרפרניים	Fabaceae	6	6	לא להתעסק
NZN-9	Nitzana	Tepper and Bar-Oz	דניאל	2017	A	102	1075-1	3	Light Fraction	2	7	רימון מצוי	Punica granatum	זרע	seed	רימוניים	Lythraceae	4	4
NZN-9	Nitzana	Tepper and Bar-Oz	דניאל	2017	A	102	1075-1	3	Light Fraction	2	8	דגן		חלקי שדרה	rachis fragments	דגניים	Gramineae	6	6
NZN-9	Nitzana	Tepper and Bar-Oz	דניאל	2017	A	102	1075-1	3	Light Fraction	2	9	דגן		פרקי גבעול	culm nodes	דגניים	Gramineae	17	17
NZN-9	Nitzana	Tepper and Bar-Oz	דניאל	2017	A	102	1075-1	3	Light Fraction	2	10	דגו		גרגיר	grain	דגניים	Gramineae	1	1	למדוד ולהגדיר
NZN-9	Nitzana	Tepper and Bar-Oz	דניאל	2017	A	102	1075-1	3	Light Fraction	2	11	גרגרנית החילבה	Trigonella foenum-graecum/berythea	זרע	seed	פרפרניים	Fabaceae	3	3
NZN-9	Nitzana	Tepper and Bar-Oz	דניאל	2017	A	102	1075-1	3	Light Fraction	2	12	חבל						1	1	מתחבר ל bulk
NZN-9	Nitzana	Tepper and Bar-Oz	דניאל	2017	A	102	1075-1	3	Light Fraction	2	13	בד
NZN-9	Nitzana	Tepper and Bar-Oz	דניאל	2017	A	102	1075-1	3	Light Fraction	2	14	גללים
NZN-9	Nitzana	Tepper and Bar-Oz	דניאל	2017	A	102	1075-1	3	Light Fraction	2	15	נמלה		ראש	head			1	1	מפוחם, זיהוי לא ודאי
NZN-9	Nitzana	Tepper and Bar-Oz	דניאל	2017	A	102	1075-1	3	Light Fraction	2	16	בלתי-שונות
NZN-10	Nitzana	Tepper and Bar-Oz	דניאל	2017	A	102	1075-1	3	Heavy Residue	2	1	שעורה	Hordeum	גרגיר	grain	דגניים	Gramineae	5	5
NZN-10	Nitzana	Tepper and Bar-Oz	דניאל	2017	A	102	1075-1	3	Heavy Residue	2	2	חיטה	Triticum	גרגיר	grain	דגניים	Gramineae	2	2
NZN-10	Nitzana	Tepper and Bar-Oz	דניאל	2017	A	102	1075-1	3	Heavy Residue	2	3	חיטה/שעורה	Hordeum/Triticum	גרגיר	grain	דגניים	Gramineae	1	1	נראה לי חיטה אך יעל חוששת לשבר-אורך
NZN-10	Nitzana	Tepper and Bar-Oz	דניאל	2017	A	102	1075-1	3	Heavy Residue	2	4	קטניות								לחבר ולהגדיר בהמשך
NZN-10	Nitzana	Tepper and Bar-Oz	דניאל	2017	A	102	1075-1	3	Heavy Residue	2	5	שקד מצוי	Prunus amygdalus	קליפה פנימית		ורדיים	Rosaceae	1	1
NZN-10	Nitzana	Tepper and Bar-Oz	דניאל	2017	A	102	1075-1	3	Heavy Residue	2	6	זית	Olea europaea	שבר	fragment	זיתיים	Oleaceae	1	1
NZN-10	Nitzana	Tepper and Bar-Oz	דניאל	2017	A	102	1075-1	3	Heavy Residue	2	7	חבל, בד								מתחבר ל bulk ול-8-12
NZN-10	Nitzana	Tepper and Bar-Oz	דניאל	2017	A	102	1075-1	3	Heavy Residue	2	8	בלתי
NZN-10	Nitzana	Tepper and Bar-Oz	דניאל	2017	A	102	1075-1	3	Heavy Residue	2	9	בלתי-שונות
NZN-11	Nitzana	Tepper and Bar-Oz		2017-2020	A	102	1094-2	3	Light Fraction	2	1	שעורה	Hordeum	גרגיר	grain	דגניים	Gramineae	3	3
NZN-11	Nitzana	Tepper and Bar-Oz		2017-2020	A	102	1094-2	3	Light Fraction	2	2	חיטה	Triticum	גרגיר	grain	דגניים	Gramineae	3	3
NZN-11	Nitzana	Tepper and Bar-Oz		2017-2020	A	102	1094-2	3	Light Fraction	2	3	חיטה/שעורה	Hordeum/Triticum	גרגיר	grain	דגניים	Gramineae	2	2	כנראה חיטה
NZN-11	Nitzana	Tepper and Bar-Oz		2017-2020	A	102	1094-2	3	Light Fraction	2	4	גפן	Vitis vinifera	חרצן	pip	גפניים	Vitaceae	3	3
NZN-11	Nitzana	Tepper and Bar-Oz		2017-2020	A	102	1094-2	3	Light Fraction	2	5	גפן	Vitis vinifera	עוקץ	pedicel	גפניים	Vitaceae	2	2
NZN-11	Nitzana	Tepper and Bar-Oz		2017-2020	A	102	1094-2	3	Light Fraction	2	6			פרקי גבעול	culm nodes	דגניים	Gramineae	5	5
NZN-11	Nitzana	Tepper and Bar-Oz		2017-2020	A	102	1094-2	3	Light Fraction	2	7	בלתי						2	2	פסיגי קטנית? לא להתעסק
NZN-11	Nitzana	Tepper and Bar-Oz		2017-2020	A	102	1094-2	3	Light Fraction	2	8	תמר	Phoenix dactylifera	גלעין	stone	דקליים	Palmae	1	1
NZN-11	Nitzana	Tepper and Bar-Oz		2017-2020	A	102	1094-2	3	Light Fraction	2	9	דגן		שבר	fragment
NZN-11	Nitzana	Tepper and Bar-Oz		2017-2020	A	102	1094-2	3	Light Fraction	2	10	בלתי								שווה בדיקה
NZN-12	Nitzana	Tepper and Bar-Oz		2017-2020	A	102	1094-2	3	Heavy Residue	2	1	שעורה	Hordeum	גרגיר	grain	דגניים	Gramineae	3	3
NZN-12	Nitzana	Tepper and Bar-Oz		2017-2020	A	102	1094-2	3	Heavy Residue	2	2	חיטה/שעורה	Hordeum/Triticum	גרגיר	grain	דגניים	Gramineae	4	4
NZN-12	Nitzana	Tepper and Bar-Oz		2017-2020	A	102	1094-2	3	Heavy Residue	2	3	בלתי-שונות						6	6
NZN-13	Nitzana	Tepper and Bar-Oz		2017-2020	A	102	1116-2	3	Light Fraction	2	1	שעורה	Hordeum	גרגיר	grain	דגניים	Gramineae	13	13
NZN-13	Nitzana	Tepper and Bar-Oz		2017-2020	A	102	1116-2	3	Light Fraction	2	2	חיטה	Triticum	גרגיר	grain	דגניים	Gramineae	3	3
NZN-13	Nitzana	Tepper and Bar-Oz		2017-2020	A	102	1116-2	3	Light Fraction	2	3	גפן	Vitis vinifera	חרצן	pip	גפניים	Vitaceae	7	7
NZN-13	Nitzana	Tepper and Bar-Oz		2017-2020	A	102	1116-2	3	Light Fraction	2	4	גפן	Vitis vinifera	עוקץ	pedicel	גפניים	Vitaceae	1	1
NZN-13	Nitzana	Tepper and Bar-Oz		2017-2020	A	102	1116-2	3	Light Fraction	2	5	קטנית		פסיג וזרע	cotyledon and seed	פרפרניים	Fabaceae	4	4	לא להתעסק
NZN-13	Nitzana	Tepper and Bar-Oz		2017-2020	A	102	1116-2	3	Light Fraction	2	6			פרקי גבעול	culm nodes	דגניים	Gramineae	3	3
NZN-13	Nitzana	Tepper and Bar-Oz		2017-2020	A	102	1116-2	3	Light Fraction	2	7	?חיטה טטרפלוידית	Triticum cf. turgidum s.l.	בסיס ציר שיבולת	first rachis fragments	דגניים	Gramineae	1	1
NZN-13	Nitzana	Tepper and Bar-Oz		2017-2020	A	102	1116-2	3	Light Fraction	2	8			שורשי דגן	roots	דגניים	Gramineae	2	2
NZN-13	Nitzana	Tepper and Bar-Oz		2017-2020	A	102	1116-2	3	Light Fraction	2	9	דגן		שבר גרגיר	grain fragment	דגניים	Gramineae
NZN-13	Nitzana	Tepper and Bar-Oz		2017-2020	A	102	1116-2	3	Light Fraction	2	10	מתנן שעיר	Thymelaea hirsuta	עלה	leaf	מתנניים	Thymelaceae	1	1
NZN-13	Nitzana	Tepper and Bar-Oz		2017-2020	A	102	1116-2	3	Light Fraction	2	11	בלתי		ציפה של פרי?				3	3
NZN-13	Nitzana	Tepper and Bar-Oz		2017-2020	A	102	1116-2	3	Light Fraction	2	12	יבלית מצויה בתוך גלל	Cynodon dactylon in dung	זרע בגלל	seed in dung	דגניים	Gramineae	1	1
NZN-13	Nitzana	Tepper and Bar-Oz		2017-2020	A	102	1116-2	3	Light Fraction	2	13	בלתי		קליפה של זרע				1	1	צנובר?? רימון?
NZN-13	Nitzana	Tepper and Bar-Oz		2017-2020	A	102	1116-2	3	Light Fraction	2	14	EMPTY
NZN-13	Nitzana	Tepper and Bar-Oz		2017-2020	A	102	1116-2	3	Light Fraction	2	15	בלתי						1	1	בדקתי את כל הזוגניים, רק בזוגן השיח היה פריט שדומה. יואל ראה בשנית
NZN-13	Nitzana	Tepper and Bar-Oz		2017-2020	A	102	1116-2	3	Light Fraction	2	16	בלתי-שונות
NZN-13	Nitzana	Tepper and Bar-Oz		2017-2020	A	102	1116-2	3	Light Fraction	1	17	גפן	Vitis vinifera	חרצן	pip	גפניים	Vitaceae	3	3	לפי עוקץ חרצן
NZN-13	Nitzana	Tepper and Bar-Oz		2017-2020	A	102	1116-2	3	Light Fraction	1	18	גפן	Vitis vinifera	עוקץ	pedicel	גפניים	Vitaceae	5	5
NZN-13	Nitzana	Tepper and Bar-Oz		2017-2020	A	102	1116-2	3	Light Fraction	1	19	שעורה שש-טורית	Hordeum vulgare subsp. hexastichum	פרק ציר שיבולת	rachis fragments	דגניים	Gramineae	3	3
NZN-13	Nitzana	Tepper and Bar-Oz		2017-2020	A	102	1116-2	3	Light Fraction	1	20	שעורה דו-טורית/התבור	Hordeum vulgare subsp. disticum/spontaneum	פרק ציר שיבולת	rachis fragments	דגניים	Gramineae	3	3
NZN-13	Nitzana	Tepper and Bar-Oz		2017-2020	A	102	1116-2	3	Light Fraction	1	21	שעורה	Hordeum vulgare	פרק ציר שיבולת	rachis fragments	דגניים	Gramineae	7	7
NZN-13	Nitzana	Tepper and Bar-Oz		2017-2020	A	102	1116-2	3	Light Fraction	1	22	שעורה?	cf. Hordeum vulgare	צווארון	culm collar and first rachis segment	דגניים	Gramineae	1	1
NZN-13	Nitzana	Tepper and Bar-Oz		2017-2020	A	102	1116-2	3	Light Fraction	1	23	חיטת הלחם	Triticum aestivum	פרק ציר שיבולת	rachis fragments	דגניים	Gramineae	2	2
NZN-13	Nitzana	Tepper and Bar-Oz		2017-2020	A	102	1116-2	3	Light Fraction	1	24	חיטת הלחם?	Triticum cf. aestivum	בסיס ציר שיבולת	basal rachis segment	דגניים	Gramineae	1	1
NZN-13	Nitzana	Tepper and Bar-Oz		2017-2020	A	102	1116-2	3	Light Fraction	1	25	חיטת הלחם?	Triticum cf. aestivum	פרק ציר שיבולת עם גלל	rachis fragments with dung matrix	דגניים	Gramineae	1	1
NZN-13	Nitzana	Tepper and Bar-Oz		2017-2020	A	102	1116-2	3	Light Fraction	1	26	חיטה טטרפלוידית	Triticum turgidum s.l.	פרק ציר שיבולת	rachis fragments	דגניים	Gramineae	33	33
NZN-13	Nitzana	Tepper and Bar-Oz		2017-2020	A	102	1116-2	3	Light Fraction	1	27	חיטה	Triticum	פרק ציר שיבולת	rachis fragments	דגניים	Gramineae	2	2
NZN-13	Nitzana	Tepper and Bar-Oz		2017-2020	A	102	1116-2	3	Light Fraction	1	28	חיטה/שעורה	Hordeum/Triticum	בסיס ציר שיבולת	rachis fragments	דגניים	Gramineae	5	5
NZN-13	Nitzana	Tepper and Bar-Oz		2017-2020	A	102	1116-2	3	Light Fraction	1	29	חיטה/שעורה	Hordeum/Triticum	בסיס ציר שיבולת	basal rachis segment	דגניים	Gramineae	1	1
NZN-13	Nitzana	Tepper and Bar-Oz		2017-2020	A	102	1116-2	3	Light Fraction	1	30			שורשי דגן	roots	דגניים	Gramineae	1	1
NZN-13	Nitzana	Tepper and Bar-Oz		2017-2020	A	102	1116-2	3	Light Fraction	1	31			פרקי גבעול	culm nodes	דגניים	Gramineae	18	18
NZN-13	Nitzana	Tepper and Bar-Oz		2017-2020	A	102	1116-2	3	Light Fraction	1	32	שעורה	Hordeum	גרגיר	grain	דגניים	Gramineae	2	2
NZN-13	Nitzana	Tepper and Bar-Oz		2017-2020	A	102	1116-2	3	Light Fraction	1	33	עוקצר מצוי	Brachypodium distachyon	גרגיר	grain	דגניים	Gramineae	11	11
NZN-13	Nitzana	Tepper and Bar-Oz		2017-2020	A	102	1116-2	3	Light Fraction	1	34	גרגרנית ערבית	Trigonella arabica	זרע	seed	פרפרניים	Fabaceae	1	1
NZN-13	Nitzana	Tepper and Bar-Oz		2017-2020	A	102	1116-2	3	Light Fraction	1	35	פרפרני קטן		זרע	seed	פרפרניים	Fabaceae	1	1
NZN-13	Nitzana	Tepper and Bar-Oz		2017-2020	A	102	1116-2	3	Light Fraction	1	36	זנב-עקרב שיכני	Scorpiurus muricatus	זרע	seed	פרפרניים	Fabaceae	2	2	עם קליפה דבוקה
NZN-13	Nitzana	Tepper and Bar-Oz		2017-2020	A	102	1116-2	3	Light Fraction	1	37	מתנן שעיר	Thymelaea hirsuta	אגוזית	nutlet	מתנניים	Thymelaceae	1	1
NZN-13	Nitzana	Tepper and Bar-Oz		2017-2020	A	102	1116-2	3	Light Fraction	1	38	מתנן שעיר	Thymelaea hirsuta	עלה	leaf	מתנניים	Thymelaceae	4620	4620	לא הפרדתי אותם. ספרתי 4619 אבל סטיית הטעות יותר מאחת בגלל שיקולים של מה נחשב יותר מחצי
NZN-13	Nitzana	Tepper and Bar-Oz		2017-2020	A	102	1116-2	3	Light Fraction	1	39	מתנן שעיר	Thymelaea hirsuta	קצה ענף עם עלים	branch apex with leaves	מתנניים	Thymelaceae	46	46
NZN-13	Nitzana	Tepper and Bar-Oz		2017-2020	A	102	1116-2	3	Light Fraction	1	40	אמיך קוצני	Emex spinosa					1	1
NZN-13	Nitzana	Tepper and Bar-Oz		2017-2020	A	102	1116-2	3	Light Fraction	1	41	ציפרני החתול	Calendula sp.	זרע				3	3
NZN-13	Nitzana	Tepper and Bar-Oz		2017-2020	A	102	1116-2	3	Light Fraction	1	42	חלמית קטנת-פרחים/חדת-אונות	Malva parviflora/oxyloba	זרע	seed	חלמיתיים	Malvaceae	14	14
NZN-13	Nitzana	Tepper and Bar-Oz		2017-2020	A	102	1116-2	3	Light Fraction	1	43	חלמית	Malva sp.	זרע	seed			1	1	אולי חלמית מצרית?
NZN-13	Nitzana	Tepper and Bar-Oz		2017-2020	A	102	1116-2	3	Light Fraction	1	44	סוככי להגדרה		זרע	seed	סוככיים	Apiaceae	1	1
NZN-13	Nitzana	Tepper and Bar-Oz		2017-2020	A	102	1116-2	3	Light Fraction	1	45	שבר לבן	Peganum alba	זרע	seed	זוגניים	Zygopphyllaceae	1	1
NZN-13	Nitzana	Tepper and Bar-Oz		2017-2020	A	102	1116-2	3	Light Fraction	1	46	בן-שלח מנוצה	Erucaria microcarpa	תרמיל	pod segment	מצליבים	Brassicaceae	1	1
NZN-13	Nitzana	Tepper and Bar-Oz		2017-2020	A	102	1116-2	3	Light Fraction	1	47	סלקי להגדרה		זרע	seed	סלקיים	Chenopodiaceae	2	2
NZN-13	Nitzana	Tepper and Bar-Oz		2017-2020	A	102	1116-2	3	Light Fraction	1	48	פרפרני קטן						1	1
NZN-13	Nitzana	Tepper and Bar-Oz		2017-2020	A	102	1116-2	3	Light Fraction	1	49	שרוע cf. עכנאי	Echium cf. angustifolium	זרע	seed	זיפניים	Boraginaceae	1	1
NZN-13	Nitzana	Tepper and Bar-Oz		2017-2020	A	102	1116-2	3	Light Fraction	1	50	בלתי		שברי זרע	seed fragments			1	1	רימון??
NZN-13	Nitzana	Tepper and Bar-Oz		2017-2020	A	102	1116-2	3	Light Fraction	1	51	לחבר בהמשך						1	1	אשליל? גפן??
NZN-13	Nitzana	Tepper and Bar-Oz		2017-2020	A	102	1116-2	3	Light Fraction	1	52	לחבר בהמשך						2	2	דברים שהצטמקו
NZN-13	Nitzana	Tepper and Bar-Oz		2017-2020	A	102	1116-2	3	Light Fraction	1	53	בלתי-שונות
NZN-13	Nitzana	Tepper and Bar-Oz		2017-2020	A	102	1116-2	3	Light Fraction	1	54	רצנטי?
NZN-13	Nitzana	Tepper and Bar-Oz		2017-2020	A	102	1116-2	3	Light Fraction	1	55	חרק
NZN-13	Nitzana	Tepper and Bar-Oz		2017-2020	A	102	1116-2	3	Light Fraction	1	56	גללים
NZN-13	Nitzana	Tepper and Bar-Oz		2017-2020	A	102	1116-2	3	Light Fraction	1	57	עצם
NZN-13	Nitzana	Tepper and Bar-Oz		2017-2020	A	102	1116-2	3	Light Fraction	1	58	?צנון	Raphanus raphanistrum?	פרק תרמיל	pod segment	מצליבים	Brassicaceae?	1	1
NZN-14	Nitzana	Tepper and Bar-Oz		2017-2020	A	102	1116-2	3	Heavy Residue	2	1	שעורה	Hordeum	גרגיר	grain	דגניים	Gramineae	2	2
NZN-14	Nitzana	Tepper and Bar-Oz		2017-2020	A	102	1116-2	3	Heavy Residue	2	2	חיטה/שעורה	Hordeum/Triticum	גרגיר	grain	דגניים	Gramineae	3	3
NZN-14	Nitzana	Tepper and Bar-Oz		2017-2020	A	102	1116-2	3	Heavy Residue	2	3	בקיים?		פסיג וזרע	cotyledon and seed	פרפרניים	Fabaceae	2	2	לא להתעסק
NZN-14	Nitzana	Tepper and Bar-Oz		2017-2020	A	102	1116-2	3	Heavy Residue	2	4			חלקי שדרה	rachis fragments	דגניים	Gramineae	1	1
NZN-14	Nitzana	Tepper and Bar-Oz		2017-2020	A	102	1116-2	3	Heavy Residue	2	5	בלתי						6	6	עץ בעיקר, לא להתעסק
NZN-15	Nitzana	Tepper and Bar-Oz		2017-2020	A	103	1117-1	3	Light Fraction	2	1	שעורה	Hordeum	גרגיר	grain	דגניים	Gramineae	1	1
NZN-15	Nitzana	Tepper and Bar-Oz		2017-2020	A	103	1117-1	3	Light Fraction	2	2	חיטה/שעורה	Hordeum/Triticum	גרגיר	grain	דגניים	Gramineae	1	1
NZN-15	Nitzana	Tepper and Bar-Oz		2017-2020	A	103	1117-1	3	Light Fraction	2	3			פרקי גבעול	culm nodes	דגניים	Gramineae	5	5	כולל שורשים
NZN-15	Nitzana	Tepper and Bar-Oz		2017-2020	A	103	1117-1	3	Light Fraction	2	4	חרוב מצוי	Ceratonia siliqua	זרע	seed	כליליים	Caesalpiniaceae	1	1
NZN-15	Nitzana	Tepper and Bar-Oz		2017-2020	A	103	1117-1	3	Light Fraction	2	5	גפן?		זג?				1	1	ציפה?	מועמד לפטריות
NZN-15	Nitzana	Tepper and Bar-Oz		2017-2020	A	103	1117-1	3	Light Fraction	2	6	בלתי-שונות						4	4
NZN-15	Nitzana	Tepper and Bar-Oz		2017-2020	A	103	1117-1	3	Light Fraction	2	7	גללים								סוגים שונים
NZN-16	Nitzana	Tepper and Bar-Oz		2017-2020	A	103	1117-1	3	Heavy Residue	2	1	שעורה	Hordeum	גרגיר	grain	דגניים	Gramineae	1	1
NZN-16	Nitzana	Tepper and Bar-Oz		2017-2020	A	103	1117-1	3	Heavy Residue	2	2	חיטה	Triticum	גרגיר	grain	דגניים	Gramineae	1	1
NZN-16	Nitzana	Tepper and Bar-Oz		2017-2020	A	103	1117-1	3	Heavy Residue	2	3	חיטה/שעורה	Hordeum/Triticum	גרגיר	grain	דגניים	Gramineae	4	4
NZN-16	Nitzana	Tepper and Bar-Oz		2017-2020	A	103	1117-1	3	Heavy Residue	2	4	גפן	Vitis vinifera	עוקץ	pedicel	גפניים	Vitaceae	1	1
NZN-16	Nitzana	Tepper and Bar-Oz		2017-2020	A	103	1117-1	3	Heavy Residue	2	5	עדשה	Lens culinaris	פסיג	cotyledon	פרפרניים	Fabaceae	1	1
NZN-16	Nitzana	Tepper and Bar-Oz		2017-2020	A	103	1117-1	3	Heavy Residue	2	6	בלתי						3	3	שווה בדיקה
NZN-17	Nitzana	Tepper and Bar-Oz		2017-2020	A	103	1136-2	3	Light Fraction	2	1	שעורה	Hordeum	גרגיר	grain	דגניים	Gramineae	5	5
NZN-17	Nitzana	Tepper and Bar-Oz		2017-2020	A	103	1136-2	3	Light Fraction	2	2	חיטה	Triticum	גרגיר	grain	דגניים	Gramineae	1	1
NZN-17	Nitzana	Tepper and Bar-Oz		2017-2020	A	103	1136-2	3	Light Fraction	2	3	חיטה/שעורה	Hordeum/Triticum	גרגיר	grain	דגניים	Gramineae	3	3
NZN-17	Nitzana	Tepper and Bar-Oz		2017-2020	A	103	1136-2	3	Light Fraction	2	4	גפן	Vitis vinifera	חרצן	pip	גפניים	Vitaceae	1	1
NZN-17	Nitzana	Tepper and Bar-Oz		2017-2020	A	103	1136-2	3	Light Fraction	2	5			פרקי גבעול	culm nodes	דגניים	Gramineae	3	3
NZN-17	Nitzana	Tepper and Bar-Oz		2017-2020	A	103	1136-2	3	Light Fraction	2	6	בקיי	Vicieae	שבר זרע	seed fragment	פרפרניים	Fabaceae	1	1
NZN-17	Nitzana	Tepper and Bar-Oz		2017-2020	A	103	1136-2	3	Light Fraction	2	7	בלתי
NZN-17	Nitzana	Tepper and Bar-Oz		2017-2020	A	103	1136-2	3	Light Fraction	2	8	אהל מצוי	Mesembryanthemum nodiflorum	אגוזית	nutlet					רצנטי
NZN-17	Nitzana	Tepper and Bar-Oz		2017-2020	A	103	1136-2	3	Light Fraction	2	9	גלל
NZN-18	Nitzana	Tepper and Bar-Oz		2017-2020	A	103	1136-2	3	Heavy Residue	2	1	חיטה	Triticum	גרגיר	grain	דגניים	Gramineae	1	1
NZN-18	Nitzana	Tepper and Bar-Oz		2017-2020	A	103	1136-2	3	Heavy Residue	2	2	חיטה/שעורה	Hordeum/Triticum	גרגיר	grain	דגניים	Gramineae	2	2
NZN-18	Nitzana	Tepper and Bar-Oz		2017-2020	A	103	1136-2	3	Heavy Residue	2	3	בלתי						1	1	שווה בדיקה
NZN-19	Nitzana	Tepper and Bar-Oz		2017-2020	A	103	1171-4	3	Light Fraction	2	1	שעורה	Hordeum	גרגיר	grain	דגניים	Gramineae	6	6
NZN-19	Nitzana	Tepper and Bar-Oz		2017-2020	A	103	1171-4	3	Light Fraction	2	2	חיטה	Triticum	גרגיר	grain	דגניים	Gramineae	2	2
NZN-19	Nitzana	Tepper and Bar-Oz		2017-2020	A	103	1171-4	3	Light Fraction	2	3	גפן?	Vitis vinifera?	חרצן	pip	גפניים?	Vitaceae?	1	1
NZN-19	Nitzana	Tepper and Bar-Oz		2017-2020	A	103	1171-4	3	Light Fraction	2	4	גפן	Vitis vinifera	עוקץ	pedicel	גפניים	Vitaceae	3	3
NZN-19	Nitzana	Tepper and Bar-Oz		2017-2020	A	103	1171-4	3	Light Fraction	2	5			פרקי גבעול	culm nodes	דגניים	Gramineae	7	7
NZN-19	Nitzana	Tepper and Bar-Oz		2017-2020	A	103	1171-4	3	Light Fraction	2	6	בלתי		גרגיר	grain	דגניים	Gramineae	1	1
NZN-19	Nitzana	Tepper and Bar-Oz		2017-2020	A	103	1171-4	3	Light Fraction	2	7	בלתי-שונות								כולל שבר דגן, גלל מפוחם ועוד
NZN-20	Nitzana	Tepper and Bar-Oz		2017-2020	A	103	1171-4	3	Heavy Residue	2	1	אריג		פיסה				1	1
NZN-21	Nitzana	Tepper and Bar-Oz		2017-2020	A	104	1192-1	3	Light Fraction	2	1	שעורה	Hordeum	גרגיר	grain	דגניים	Gramineae	4	4
NZN-21	Nitzana	Tepper and Bar-Oz		2017-2020	A	104	1192-1	3	Light Fraction	2	2	חיטה/שעורה	Hordeum/Triticum	שבר גרגיר	grain fragment	דגניים	Gramineae			2 שברים
NZN-21	Nitzana	Tepper and Bar-Oz		2017-2020	A	104	1192-1	3	Light Fraction	2	3	גפן	Vitis vinifera	חרצן	pip	גפניים	Vitaceae	3	3	MNI=4
NZN-21	Nitzana	Tepper and Bar-Oz		2017-2020	A	104	1192-1	3	Light Fraction	2	4			פרקי גבעול	culm nodes	דגניים	Gramineae	6	6
NZN-21	Nitzana	Tepper and Bar-Oz		2017-2020	A	104	1192-1	3	Light Fraction	2	5	דבקה	Galium sp.	זרע	seed	פואתיים	Rubiaceae	3	3
NZN-21	Nitzana	Tepper and Bar-Oz		2017-2020	A	104	1192-1	3	Light Fraction	2	6	להגדרה		תפרחת וזרעונים	inflorescence and achenes	מורכבים	Asteraceae			30-40 achenes	האם זה מה שאני מוצא לפעמים בגללים?
NZN-21	Nitzana	Tepper and Bar-Oz		2017-2020	A	104	1192-1	3	Light Fraction	2	7	בלתי						1	1	מזכיר משהו משבטה
NZN-21	Nitzana	Tepper and Bar-Oz		2017-2020	A	104	1192-1	3	Light Fraction	2	8	בלתי
NZN-21	Nitzana	Tepper and Bar-Oz		2017-2020	A	104	1192-1	3	Light Fraction	2	9	גללים
NZN-22	Nitzana	Tepper and Bar-Oz		2017-2020	A	104	1192-1	3	Heavy Residue	2	1	גפן	Vitis vinifera	חרצן	pip	גפניים	Vitaceae	1	1
NZN-22	Nitzana	Tepper and Bar-Oz		2017-2020	A	104	1192-1	3	Heavy Residue	2	2	בלתי		זרע	seed	פרפרניים	Fabaceae	1	1	לא להתעסק
NZN-22	Nitzana	Tepper and Bar-Oz		2017-2020	A	104	1192-1	3	Heavy Residue	2	3	שלמון יפואי	Cephalaria joppensis	פרי	fruit	שלמוניים	Dipsacaceae	1	1
NZN-22	Nitzana	Tepper and Bar-Oz		2017-2020	A	104	1192-1	3	Heavy Residue	2	4	בלתי						2	2
NZN-23	Nitzana	Tepper and Bar-Oz		2017-2020	A	104	1195-1	3	Light Fraction	2	1	שעורה	Hordeum	גרגיר	grain	דגניים	Gramineae	5	5
NZN-23	Nitzana	Tepper and Bar-Oz		2017-2020	A	104	1195-1	3	Light Fraction	2	2	חיטה	Triticum	גרגיר	grain	דגניים	Gramineae	3	3
NZN-23	Nitzana	Tepper and Bar-Oz		2017-2020	A	104	1195-1	3	Light Fraction	2	3	EMPTY
NZN-23	Nitzana	Tepper and Bar-Oz		2017-2020	A	104	1195-1	3	Light Fraction	2	4	גפן	Vitis vinifera	חרצן	pip	גפניים	Vitaceae	4	4	2 רק אנדוספרם
NZN-23	Nitzana	Tepper and Bar-Oz		2017-2020	A	104	1195-1	3	Light Fraction	2	5	גפן	Vitis vinifera	עוקץ	pedicel	גפניים	Vitaceae	1	1
NZN-23	Nitzana	Tepper and Bar-Oz		2017-2020	A	104	1195-1	3	Light Fraction	2	6			פרקי גבעול	culm nodes	דגניים	Gramineae	7	7	כולל שורש
NZN-23	Nitzana	Tepper and Bar-Oz		2017-2020	A	104	1195-1	3	Light Fraction	2	7	קטניות		פסיג	cotyledon	פרפרניים	Fabaceae	2	2	לא להתעסק
NZN-23	Nitzana	Tepper and Bar-Oz		2017-2020	A	104	1195-1	3	Light Fraction	2	8	זית?	cf. Olea europaea	קליפת זרע	seed coat fragment			1	1	אולי גם זית
NZN-23	Nitzana	Tepper and Bar-Oz		2017-2020	A	104	1195-1	3	Light Fraction	2	9	להמשך בלתי		זרע	seed			1	1	יואל ראה והחזיר ללא כיוון
NZN-23	Nitzana	Tepper and Bar-Oz		2017-2020	A	104	1195-1	3	Light Fraction	2	10	זילה?	Zilla?					1	1
NZN-23	Nitzana	Tepper and Bar-Oz		2017-2020	A	104	1195-1	3	Light Fraction	2	11	אמיך קוצני	Emex spinosa					1	1	אמיך?
NZN-23	Nitzana	Tepper and Bar-Oz		2017-2020	A	104	1195-1	3	Light Fraction	2	12	בלתי						4	4	שונות
NZN-23	Nitzana	Tepper and Bar-Oz		2017-2020	A	104	1195-1	3	Light Fraction	2	13	בקיית הכרשינה						1	1	לוודא
NZN-23	Nitzana	Tepper and Bar-Oz		2017-2020	A	104	1195-1	3	Light Fraction	2	14			עלה	leaf			1	1	קטן מאד
NZN-23	Nitzana	Tepper and Bar-Oz		2017-2020	A	104	1195-1	3	Light Fraction	2	15	בלתי-שונות
NZN-23	Nitzana	Tepper and Bar-Oz		2017-2020	A	104	1195-1	3	Light Fraction	2	16	תמר??		קליפה						נראה לי גלעין תמר יבש שהתפרק. השוו לקליפות לעיל
NZN-23	Nitzana	Tepper and Bar-Oz		2017-2020	A	104	1195-1	3	Light Fraction	2	17	חרק		ראש				1	1	קדום?
NZN-23	Nitzana	Tepper and Bar-Oz		2017-2020	A	104	1195-1	3	Light Fraction	2	18	גללים
NZN-24	Nitzana	Tepper and Bar-Oz		2017-2020	A	104	1195-1	3	Heavy Residue	2	1	EMPTY								Heavy residue lost by mistake during flotation.
NZN-25	Nitzana	Tepper and Bar-Oz		2017-2020	A	104	1231-2	3	Light Fraction	2	1	שעורה	Hordeum	גרגיר	grain	דגניים	Gramineae	1	1
NZN-25	Nitzana	Tepper and Bar-Oz		2017-2020	A	104	1231-2	3	Light Fraction	2	2	חיטה	Triticum	גרגיר	grain	דגניים	Gramineae	1	1
NZN-25	Nitzana	Tepper and Bar-Oz		2017-2020	A	104	1231-2	3	Light Fraction	2	3	גפן	Vitis vinifera	חרצן	pip	גפניים	Vitaceae	5	5	ועד שברים ומסופקים
NZN-25	Nitzana	Tepper and Bar-Oz		2017-2020	A	104	1231-2	3	Light Fraction	2	4	cf. אורן ירושלים	cf. Pinus halepensis	זרע	seed			1	1
NZN-25	Nitzana	Tepper and Bar-Oz		2017-2020	A	104	1231-2	3	Light Fraction	2	5			פרקי גבעול	culm nodes	דגניים	Gramineae	2	2
NZN-25	Nitzana	Tepper and Bar-Oz		2017-2020	A	104	1231-2	3	Light Fraction	2	6	מתנן שעיר	Thymelaea hirsuta	עלה	leaf	מתנניים	Thymelaceae	1	1
NZN-25	Nitzana	Tepper and Bar-Oz		2017-2020	A	104	1231-2	3	Light Fraction	2	7	קורטם דק?		זרע	seed			1	1
NZN-25	Nitzana	Tepper and Bar-Oz		2017-2020	A	104	1231-2	3	Light Fraction	2	8	שבר לבן	Peganum alba	זרע	seed			1	1
NZN-25	Nitzana	Tepper and Bar-Oz		2017-2020	A	104	1231-2	3	Light Fraction	2	9	בלתי - להמשך		זרע	seed			1	1	יואל ראה
NZN-25	Nitzana	Tepper and Bar-Oz		2017-2020	A	104	1231-2	3	Light Fraction	2	10	בלתי - להמשך		זרע	seed			3	3	יואל ראה
NZN-25	Nitzana	Tepper and Bar-Oz		2017-2020	A	104	1231-2	3	Light Fraction	2	11	בלתי		זרע/קליפה				3	3
NZN-25	Nitzana	Tepper and Bar-Oz		2017-2020	A	104	1231-2	3	Light Fraction	2	12			קליפה						תמר? השווה לקודם ול23-16
NZN-25	Nitzana	Tepper and Bar-Oz		2017-2020	A	104	1231-2	3	Light Fraction	2	13	ורדני?זית?		שברי קליפת הגלעין	seed coat fragment					השווה ל23-8
NZN-25	Nitzana	Tepper and Bar-Oz		2017-2020	A	104	1231-2	3	Light Fraction	2	14	בלתי		זרע/קליפה
NZN-25	Nitzana	Tepper and Bar-Oz		2017-2020	A	104	1231-2	3	Light Fraction	2	15	בלתי		קליפות	peel					רימון?? כנראה מינים שונים
NZN-25	Nitzana	Tepper and Bar-Oz		2017-2020	A	104	1231-2	3	Light Fraction	2	16	בלתי-שונות
NZN-25	Nitzana	Tepper and Bar-Oz		2017-2020	A	104	1231-2	3	Light Fraction	2	17	שיער עזים		שיער
NZN-25	Nitzana	Tepper and Bar-Oz		2017-2020	A	104	1231-2	3	Light Fraction	2	18	גללים								בשתי מבחנות
NZN-26	Nitzana	Tepper and Bar-Oz		2017-2020	A	104	1231-2	3	Heavy Residue	2	1	זית	Olea europaea	חצי גלעין	seed coat half	זיתיים	Oleaceae	1	1
NZN-26	Nitzana	Tepper and Bar-Oz		2017-2020	A	104	1231-2	3	Heavy Residue	2	2	שיער עזים
NZN-26	Nitzana	Tepper and Bar-Oz		2017-2020	A	104	1231-2	3	Heavy Residue	2	3	בלתי-שונות
NZN-27	Nitzana	Tepper and Bar-Oz		2017-2020	A	104	1249-2	3	Light Fraction	2	1	שעורה	Hordeum vulgare	גרגיר	grain	דגניים	Gramineae	6	6
NZN-27	Nitzana	Tepper and Bar-Oz		2017-2020	A	104	1249-2	3	Light Fraction	2	2	חיטה	Triticum	גרגיר	grain	דגניים	Gramineae	1	1
NZN-27	Nitzana	Tepper and Bar-Oz		2017-2020	A	104	1249-2	3	Light Fraction	2	3	חיטה/שעורה	Hordeum/Triticum	שברי גרגיר	grain fragment	דגניים	Gramineae
NZN-27	Nitzana	Tepper and Bar-Oz		2017-2020	A	104	1249-2	3	Light Fraction	2	4	גפן	Vitis vinifera	חרצן	pip	גפניים	Vitaceae	45	45	41שלמים, השאר לפי עוקץ וגם MNI
NZN-27	Nitzana	Tepper and Bar-Oz		2017-2020	A	104	1249-2	3	Light Fraction	2	5	חיטה טטרפלוידית	Triticum turgidum s.l.	פרק ציר שיבולת	rachis fragments	דגניים	Gramineae	1	1
NZN-27	Nitzana	Tepper and Bar-Oz		2017-2020	A	104	1249-2	3	Light Fraction	2	6	חיטה	Triticum sp.	צווארון ובסיס ציר שיבולת	culm collar and basal rachis fragment	דגניים	Gramineae	2	2	אחד צווארון עם 3 פרקים, ואחד פרק בסיס
NZN-27	Nitzana	Tepper and Bar-Oz		2017-2020	A	104	1249-2	3	Light Fraction	2	7			פרקי גבעול	culm nodes	דגניים	Gramineae	25	25	ספירה +-2. יש 7-5שהם שורשים
NZN-27	Nitzana	Tepper and Bar-Oz		2017-2020	A	104	1249-2	3	Light Fraction	2	8	דבקה	Galium sp.	זרע	seed	פואתיים	Rubiaceae	1	1
NZN-27	Nitzana	Tepper and Bar-Oz		2017-2020	A	104	1249-2	3	Light Fraction	2	9	אמיך קוצני	Emex spinosa	פרי	fruiting perianth	ארכוביתיים	Polygonaceae	1	1
NZN-27	Nitzana	Tepper and Bar-Oz		2017-2020	A	104	1249-2	3	Light Fraction	2	10	סלק מצוי	Beta vulgaris	פרי	fruit	סלקיים	Chenopodiaceae	1	1
NZN-27	Nitzana	Tepper and Bar-Oz		2017-2020	A	104	1249-2	3	Light Fraction	2	11	שלמון יפואי	Cephalaria joppensis	פרי	fruit	שלמוניים	Dipsacaceae	1	1
NZN-27	Nitzana	Tepper and Bar-Oz		2017-2020	A	104	1249-2	3	Light Fraction	2	12	בלתי						2	2	מאד קטנים- כנראה מהגללים-לא להתעסק
NZN-27	Nitzana	Tepper and Bar-Oz		2017-2020	A	104	1249-2	3	Light Fraction	2	13	קטנית		זרע	seed	פרפרניים	Fabaceae	1	1	מזכיר גרגרנית החילבה/בירותית אך יותר מדיי הרוס כדי להגדיר
NZN-27	Nitzana	Tepper and Bar-Oz		2017-2020	A	104	1249-2	3	Light Fraction	2	14	אבטיח הפקועה	Citrullus colocynthis	זרע	seed	דלועיים	Cucurbitaceae	1	1
NZN-27	Nitzana	Tepper and Bar-Oz		2017-2020	A	104	1249-2	3	Light Fraction	2	15	שקד מצוי	Prunus amygdalus	שבר גלעין	endocarp fragment	ורדיים	Rosaceae	1	1
NZN-27	Nitzana	Tepper and Bar-Oz		2017-2020	A	104	1249-2	3	Light Fraction	2	16	בלתי-אורן??						1	1	אורן?
NZN-27	Nitzana	Tepper and Bar-Oz		2017-2020	A	104	1249-2	3	Light Fraction	2	17	רימון	Punica granatum	קליפה	rind	רימוניים?	Lythraceae?	1	1	לחבר בהמשך
NZN-27	Nitzana	Tepper and Bar-Oz		2017-2020	A	104	1249-2	3	Light Fraction	2	18	תמר??		קליפה	seed coat??					תמר? השווה ל25-12 ול23-16
NZN-27	Nitzana	Tepper and Bar-Oz		2017-2020	A	104	1249-2	3	Light Fraction	2	19	בלתי-שונות
NZN-27	Nitzana	Tepper and Bar-Oz		2017-2020	A	104	1249-2	3	Light Fraction	2	20	גללים								כולל2 מסוג שכיח ולא בטוח שהוא גלל
NZN-27	Nitzana	Tepper and Bar-Oz		2017-2020	A	104	1249-2	3	Light Fraction	1	21	גפן	Vitis vinifera	חרצן	pip	גפניים	Vitaceae	38	38	כולל 6 שלמים (צעירים כנראה) והמקור של לפחות 32 נוספים
NZN-27	Nitzana	Tepper and Bar-Oz		2017-2020	A	104	1249-2	3	Light Fraction	1	22	גפן	Vitis vinifera	שברי חרצן	pip fragments	גפניים	Vitaceae
NZN-27	Nitzana	Tepper and Bar-Oz		2017-2020	A	104	1249-2	3	Light Fraction	1	23	גפן	Vitis vinifera	עוקץ	pedicel	גפניים	Vitaceae	70	70
NZN-27	Nitzana	Tepper and Bar-Oz		2017-2020	A	104	1249-2	3	Light Fraction	1	24	גפן	Vitis vinifera	זג	grapeskin	גפניים	Vitaceae	10	10
NZN-27	Nitzana	Tepper and Bar-Oz		2017-2020	A	104	1249-2	3	Light Fraction	1	25	שעורה שש-טורית	Hordeum vulgare subsp. hexastichum	פרק ציר שיבולת	rachis fragments	דגניים	Gramineae	58	58	כולל 4 חלקים אם 2פרקים כל אחד
NZN-27	Nitzana	Tepper and Bar-Oz		2017-2020	A	104	1249-2	3	Light Fraction	1	26	?שעורה דו-טורית/התבור	Hordeum vulgare cf. subsp. distichum/spontaneum	פרק ציר שיבולת	rachis fragments	דגניים	Gramineae	10	10
NZN-27	Nitzana	Tepper and Bar-Oz		2017-2020	A	104	1249-2	3	Light Fraction	1	27	שעורה	Hordeum vulgare	פרק ציר שיבולת	rachis fragments	דגניים	Gramineae	60	60
NZN-27	Nitzana	Tepper and Bar-Oz		2017-2020	A	104	1249-2	3	Light Fraction	1	28	שעורה	Hordeum vulgare	בסיס ציר שיבולת	basal rachis fragments	דגניים	Gramineae	4	4
NZN-27	Nitzana	Tepper and Bar-Oz		2017-2020	A	104	1249-2	3	Light Fraction	1	29	שעורה	Hordeum sp.	פרק ציר שיבולת עם גלל	rachis fragments with dung matrix	דגניים	Gramineae	3	3
NZN-27	Nitzana	Tepper and Bar-Oz		2017-2020	A	104	1249-2	3	Light Fraction	1	30	חיטה טטרפלוידית	Triticum turgidum s.l.	פרק ציר שיבולת	rachis fragments	דגניים	Gramineae	344	344
NZN-27	Nitzana	Tepper and Bar-Oz		2017-2020	A	104	1249-2	3	Light Fraction	1	31	חיטה טטרפלוידית	Triticum turgidum s.l.	פרק ציר שיבולת עם גלל	rachis fragments with dung matrix	דגניים	Gramineae	5	5	2 כפולים
NZN-27	Nitzana	Tepper and Bar-Oz		2017-2020	A	104	1249-2	3	Light Fraction	1	32	חיטה טטרפלוידית	Triticum turgidum s.l.	בסיס ציר שיבולת	basal rachis fragments	דגניים	Gramineae	7	7
NZN-27	Nitzana	Tepper and Bar-Oz		2017-2020	A	104	1249-2	3	Light Fraction	1	33	חיטת הלחם?	cf. Triticum aestivum s.l.	פרק ציר שיבולת	rachis fragments	דגניים	Gramineae	1	1
NZN-27	Nitzana	Tepper and Bar-Oz		2017-2020	A	104	1249-2	3	Light Fraction	1	34	חיטה	Triticum sp.	פרק ציר שיבולת	rachis fragments	דגניים	Gramineae	10	10	2 כפולים
NZN-27	Nitzana	Tepper and Bar-Oz		2017-2020	A	104	1249-2	3	Light Fraction	1	35	חיטה	Triticum sp.	פרק ציר שיבולת עם גלל	rachis fragments with dung matrix	דגניים	Gramineae	1	1
NZN-27	Nitzana	Tepper and Bar-Oz		2017-2020	A	104	1249-2	3	Light Fraction	1	36	חיטה	Triticum sp.	בסיס ציר שיבולת	basal rachis fragments	דגניים	Gramineae	10	10
NZN-27	Nitzana	Tepper and Bar-Oz		2017-2020	A	104	1249-2	3	Light Fraction	1	37	חיטה?	cf. Triticum	קצה ציר שיבולת	rachis apex	דגניים	Gramineae	7	7
NZN-27	Nitzana	Tepper and Bar-Oz		2017-2020	A	104	1249-2	3	Light Fraction	1	38	חיטה/שעורה	Hordeum/Triticum	פרק ציר שיבולת	rachis fragments	דגניים	Gramineae	93	93
NZN-27	Nitzana	Tepper and Bar-Oz		2017-2020	A	104	1249-2	3	Light Fraction	1	39	חיטה/שעורה	Hordeum/Triticum	פרק ציר שיבולת עם גלל	rachis fragments with dung matrix	דגניים	Gramineae	5	5
NZN-27	Nitzana	Tepper and Bar-Oz		2017-2020	A	104	1249-2	3	Light Fraction	1	40	חיטה/שעורה	Hordeum/Triticum	בסיס ציר שיבולת	basal rachis segment	דגניים	Gramineae	23	23
NZN-27	Nitzana	Tepper and Bar-Oz		2017-2020	A	104	1249-2	3	Light Fraction	1	41	חיטה/שעורה	Hordeum/Triticum	שברי ציר שיבולת	broken rachis segments	דגניים	Gramineae			לא סופרים כאלה
NZN-27	Nitzana	Tepper and Bar-Oz		2017-2020	A	104	1249-2	3	Light Fraction	1	42	זון?	cf. Lolium	פרק ציר שיבולת	rachis fragments	דגניים	Gramineae	1	1
NZN-27	Nitzana	Tepper and Bar-Oz		2017-2020	A	104	1249-2	3	Light Fraction	1	43	שעורה?	cf. Hordeum vulgare	גרגיר	grain	דגניים	Gramineae	1	1
NZN-27	Nitzana	Tepper and Bar-Oz		2017-2020	A	104	1249-2	3	Light Fraction	1	44	שעורה	Hordeum sp.	גרגיר	grain	דגניים	Gramineae	2	2
NZN-27	Nitzana	Tepper and Bar-Oz		2017-2020	A	104	1249-2	3	Light Fraction	1	45	חיטה	Triticum sp.	גרגיר	grain	דגניים	Gramineae	2	2
NZN-27	Nitzana	Tepper and Bar-Oz		2017-2020	A	104	1249-2	3	Light Fraction	1	46	עוקצר מצוי	Brachypodium distachyon	גרגיר	grain	דגניים	Gramineae	4	4
NZN-27	Nitzana	Tepper and Bar-Oz		2017-2020	A	104	1249-2	3	Light Fraction	1	47	בלתי		גרגיר	grain	דגניים	Gramineae	2	2	אולי עוקצר
NZN-27	Nitzana	Tepper and Bar-Oz		2017-2020	A	104	1249-2	3	Light Fraction	1	48			פרקי גבעול	culm nodes	דגניים	Gramineae	45	45
NZN-27	Nitzana	Tepper and Bar-Oz		2017-2020	A	104	1249-2	3	Light Fraction	1	49			שורשי דגן	roots	דגניים	Gramineae	4	4
NZN-27	Nitzana	Tepper and Bar-Oz		2017-2020	A	104	1249-2	3	Light Fraction	1	50			שברי מלען	awn fragments	דגניים	Gramineae
NZN-27	Nitzana	Tepper and Bar-Oz		2017-2020	A	104	1249-2	3	Light Fraction	1	51	דגני		?פרק ציר שיבולת	rachis fragment?	דגניים	Gramineae	1	1
NZN-27	Nitzana	Tepper and Bar-Oz		2017-2020	A	104	1249-2	3	Light Fraction	1	52	גרגרנית ערבית?	cf. Trigonella arabica	זרע	seed	פרפרניים	Fabaceae	3	3
NZN-27	Nitzana	Tepper and Bar-Oz		2017-2020	A	104	1249-2	3	Light Fraction	1	53	?גרגרנית	cf. Trigonella	זרע	seed	פרפרניים	Fabaceae	4	4
NZN-27	Nitzana	Tepper and Bar-Oz		2017-2020	A	104	1249-2	3	Light Fraction	1	54	אספסת?	cf. Medicago	זרע	seed	פרפרניים	Fabaceae	1	1
NZN-27	Nitzana	Tepper and Bar-Oz		2017-2020	A	104	1249-2	3	Light Fraction	1	55	בלתי		זרע	seed	פרפרניים	Fabaceae	2	2	2 טיפוסים
NZN-27	Nitzana	Tepper and Bar-Oz		2017-2020	A	104	1249-2	3	Light Fraction	1	56	פיקוס התאנה	Ficus carica	אגוזית	nutlet	תותיים	Moraceae	7	7
NZN-27	Nitzana	Tepper and Bar-Oz		2017-2020	A	104	1249-2	3	Light Fraction	1	57	מתנן שעיר	Thymelaea hirsuta	אגוזית	nutlet	מתנניים	Thymelaceae	3	3
NZN-27	Nitzana	Tepper and Bar-Oz		2017-2020	A	104	1249-2	3	Light Fraction	1	58	מתנן שעיר	Thymelaea hirsuta	עלה	leaf	מתנניים	Thymelaceae	57	57
NZN-27	Nitzana	Tepper and Bar-Oz		2017-2020	A	104	1249-2	3	Light Fraction	1	59	מתנן שעיר	Thymelaea hirsuta	ענף פורה עם עלים	bud with leaves	מתנניים	Thymelaceae	1	1
NZN-27	Nitzana	Tepper and Bar-Oz		2017-2020	A	104	1249-2	3	Light Fraction	1	60	סולני?					Solanaceae	1	1
NZN-27	Nitzana	Tepper and Bar-Oz		2017-2020	A	104	1249-2	3	Light Fraction	1	61	שבר לבן		זרע				3	3
NZN-27	Nitzana	Tepper and Bar-Oz		2017-2020	A	104	1249-2	3	Light Fraction	1	62	חלמית קטנת-פרחים/חדת-אונות						11	11
NZN-27	Nitzana	Tepper and Bar-Oz		2017-2020	A	104	1249-2	3	Light Fraction	1	63	עירית צרת-עלים/נבובה	Asphodelus tenuifolius/fistulosus	זרע	seed	עיריתיים	Asphodelaceae	3	3
NZN-27	Nitzana	Tepper and Bar-Oz		2017-2020	A	104	1249-2	3	Light Fraction	1	64	סלק מצוי	Beta vulgaris			סלקיים	Chenopodiaceae	2	2
NZN-27	Nitzana	Tepper and Bar-Oz		2017-2020	A	104	1249-2	3	Light Fraction	1	65	סלקי				סלקיים	Chenopodiaceae	2	2
NZN-27	Nitzana	Tepper and Bar-Oz		2017-2020	A	104	1249-2	3	Light Fraction	1	66	עשנן קטן?	Fumaria cf. parviflora			נוריתיים		1	1
NZN-27	Nitzana	Tepper and Bar-Oz		2017-2020	A	104	1249-2	3	Light Fraction	1	67	דמומית משוננת?						1	1
NZN-27	Nitzana	Tepper and Bar-Oz		2017-2020	A	104	1249-2	3	Light Fraction	1	68	רכפתני??ציפרנית??						1	1	עברתי על רכפה וציפרנית. ציפרנית יותר מתאים אך לא מצאתי לזה שידוך טוב
NZN-27	Nitzana	Tepper and Bar-Oz		2017-2020	A	104	1249-2	3	Light Fraction	1	69	רכפה?	cf. Reseda	זרע בגלל	seed in dung	רכפתיים	Resedaceae	1	1
NZN-27	Nitzana	Tepper and Bar-Oz		2017-2020	A	104	1249-2	3	Light Fraction	1	70	עוקץ העקרב	Heliotropium	זרע	seed	זיפניים	Boraginaceae	2	2
NZN-27	Nitzana	Tepper and Bar-Oz		2017-2020	A	104	1249-2	3	Light Fraction	1	71	חד-שפה תמים	Ajuga iva	זרע	seed	שפתניים	Labiatae	2	2
NZN-27	Nitzana	Tepper and Bar-Oz		2017-2020	A	104	1249-2	3	Light Fraction	1	72	סוככי?זיפני?		זרע	seed			1	1
NZN-27	Nitzana	Tepper and Bar-Oz		2017-2020	A	104	1249-2	3	Light Fraction	1	73	שלמון יפואי	Cephalaria joppensis	פרי	fruit	שלמוניים	Dipsacaceae	1	1
NZN-27	Nitzana	Tepper and Bar-Oz		2017-2020	A	104	1249-2	3	Light Fraction	1	74	פרגה						2	2
NZN-27	Nitzana	Tepper and Bar-Oz		2017-2020	A	104	1249-2	3	Light Fraction	1	75	דבקה						3	3	1 מצטרף, שווה לבדוק
NZN-27	Nitzana	Tepper and Bar-Oz		2017-2020	A	104	1249-2	3	Light Fraction	1	76	ארכוביתי				ארכוביתיים	Polygonaceae	1	1
NZN-27	Nitzana	Tepper and Bar-Oz		2017-2020	A	104	1249-2	3	Light Fraction	1	77	?חבלבל	Convolvus?					3	3
NZN-27	Nitzana	Tepper and Bar-Oz		2017-2020	A	104	1249-2	3	Light Fraction	1	78	אשל??						1	1
NZN-27	Nitzana	Tepper and Bar-Oz		2017-2020	A	104	1249-2	3	Light Fraction	1	79	מצליבים		תרמיל	pod segment	מצליבים	Brassicaceae	1	1
NZN-27	Nitzana	Tepper and Bar-Oz		2017-2020	A	104	1249-2	3	Light Fraction	1	80	מצליבים		תרמיל	pod segment	מצליבים	Brassicaceae	1	1
NZN-27	Nitzana	Tepper and Bar-Oz		2017-2020	A	104	1249-2	3	Light Fraction	1	81	cf. רימון מצוי	cf. Punica granatum	שבר קליפה וזרע	rind and seed fragments	כופריים?	Lytheraceae?	1	1	לפי דגם קליפה, זרע מתאים לרימון אך לא שלם מספיק
NZN-27	Nitzana	Tepper and Bar-Oz		2017-2020	A	104	1249-2	3	Light Fraction	1	82	בלתי		עטיף?				1	1	חומעה?
NZN-27	Nitzana	Tepper and Bar-Oz		2017-2020	A	104	1249-2	3	Light Fraction	1	83	בלתי		פרח? ניצן?				2	2	לזכור להמשך
NZN-27	Nitzana	Tepper and Bar-Oz		2017-2020	A	104	1249-2	3	Light Fraction	1	84	בלתי		שבר תרמיל של כרבולת?				1	1	לחכות לעוד ולהשוות לGBY
NZN-27	Nitzana	Tepper and Bar-Oz		2017-2020	A	104	1249-2	3	Light Fraction	1	85	בלתי		חרק או פרפרני?				1	1
NZN-27	Nitzana	Tepper and Bar-Oz		2017-2020	A	104	1249-2	3	Light Fraction	1	86	ציפרני החתול	Calendula sp.	זרעון	achene	מורכבים	Asteraceae	1	1	6
NZN-27	Nitzana	Tepper and Bar-Oz		2017-2020	A	104	1249-2	3	Light Fraction	1	87	חרצית?		זרעון	achene	מורכבים	Asteraceae	4	4
NZN-27	Nitzana	Tepper and Bar-Oz		2017-2020	A	104	1249-2	3	Light Fraction	1	88	קחוון??		זרעון	achene	מורכבים	Asteraceae	3	3
NZN-27	Nitzana	Tepper and Bar-Oz		2017-2020	A	104	1249-2	3	Light Fraction	1	89	בלתי		קוץ?				1	1	מורכבים נפסלו היה חשש ל-cotula אבל לא
NZN-27	Nitzana	Tepper and Bar-Oz		2017-2020	A	104	1249-2	3	Light Fraction	1	90	בלתי				מורכבים?	Asteraceae?	1	1	מוצנית קטנת פרחים - בדקתי ואי אפשר לפסול אבל אי אפשר להכריע
NZN-27	Nitzana	Tepper and Bar-Oz		2017-2020	A	104	1249-2	3	Light Fraction	1	91	בלתי-שונות
NZN-27	Nitzana	Tepper and Bar-Oz		2017-2020	A	104	1249-2	3	Light Fraction	1	92	חרק		שונות
NZN-27	Nitzana	Tepper and Bar-Oz		2017-2020	A	104	1249-2	3	Light Fraction	1	93	גללים								רק מדגם מאד חלקי ממה שיש
NZN-27	Nitzana	Tepper and Bar-Oz		2017-2020	A	104	1249-2	3	Light Fraction	1	94	עצם
NZN-27	Nitzana	Tepper and Bar-Oz		2017-2020	A	104	1249-2		Light Fraction	0.5	95	גפן	Vitis vinifera	עוקץ	pedicel	גפניים	Vitaceae	2	2
NZN-27	Nitzana	Tepper and Bar-Oz		2017-2020	A	104	1249-2		Light Fraction	0.5	96	גפן	Vitis vinifera	שברי חרצן	pip fragments			6	6	רק חלק
NZN-27	Nitzana	Tepper and Bar-Oz		2017-2020	A	104	1249-2		Light Fraction	0.5	97	תאנה	Ficus carica	אגוזית	nutlet	תותיים	Moraceae	22	22
NZN-27	Nitzana	Tepper and Bar-Oz		2017-2020	A	104	1249-2		Light Fraction	0.5	98	גרגרנית/תלתן		זרע	seed	פרפרניים	Fabaceae	1	1
NZN-27	Nitzana	Tepper and Bar-Oz		2017-2020	A	104	1249-2		Light Fraction	0.5	99	?			culm nodes			4	4
NZN-27	Nitzana	Tepper and Bar-Oz		2017-2020	A	104	1249-2		Light Fraction	0.5	100	דגני			rachis	דגניים	Gramineae	35	35
NZN-27	Nitzana	Tepper and Bar-Oz		2017-2020	A	104	1249-2		Light Fraction	0.5	101	גלל		שברים				12	12
NZN-27	Nitzana	Tepper and Bar-Oz		2017-2020	A	104	1249-2		Light Fraction	0.5	102	מלען וגלומה		שברים						רק חלק נאסף
NZN-27	Nitzana	Tepper and Bar-Oz		2017-2020	A	104	1249-2		Light Fraction	0.5	103	מתנן שעיר	Thymelaea hirsuta	שבר אגוזית	nutlet fragment	מתנניים	Thymelaceae	1	1
NZN-27	Nitzana	Tepper and Bar-Oz		2017-2020	A	104	1249-2		Light Fraction	0.5	104	מצליב? פרפרני				פרפרניים	Fabaceae	3	3
NZN-27	Nitzana	Tepper and Bar-Oz		2017-2020	A	104	1249-2		Light Fraction	0.5	105	מתנן שעיר	Thymelaea hirsuta	עלים	leaf	מתנניים	Thymelaceae
NZN-27	Nitzana	Tepper and Bar-Oz		2017-2020	A	104	1249-2		Light Fraction	0.5	106	אספרגולה	Spergula	זרע?	seed?	ציפורניים	Caryophyllaceae	3	3
NZN-27	Nitzana	Tepper and Bar-Oz		2017-2020	A	104	1249-2		Light Fraction	0.5	107	כף - אווז	Chenopodium murale/ Chenopodium sp.	זרע?	seed?	סלקיים	Chenopodiaceae	6	6	האשפות
NZN-27	Nitzana	Tepper and Bar-Oz		2017-2020	A	104	1249-2		Light Fraction	0.5	108	חיעד ספרדי	Aizoon hispanicum L.	זרע?	seed?	חיעדיים	Aizoaceae	10	10
NZN-27	Nitzana	Tepper and Bar-Oz		2017-2020	A	104	1249-2		Light Fraction	0.5	109	רכפה	cf. Reseda	זרע?	seed?	רכפתיים	Resedaceae	1	1
NZN-27	Nitzana	Tepper and Bar-Oz		2017-2020	A	104	1249-2		Light Fraction	0.5	110	מרגנית השדה	Anagallis arvensis L.	זרע?	seed?	רקפתיים	Primulaceae	1	1
NZN-27	Nitzana	Tepper and Bar-Oz		2017-2020	A	104	1249-2		Light Fraction	0.5	111	רכפה	cf. Reseda	זרע?	seed?	רכפתיים	Resedaceae	1	1	להגדרה
NZN-27	Nitzana	Tepper and Bar-Oz		2017-2020	A	104	1249-2		Light Fraction	0.5	112	סלק??	Beta vulgaris?	זרע?	seed?	סלקיים	Chenopodiaceae	1	1
NZN-27	Nitzana	Tepper and Bar-Oz		2017-2020	A	104	1249-2		Light Fraction	0.5	113	חלמית	Malva sp.	זרע?	seed?	חלמיתיים	Malvaceae	1	1
NZN-27	Nitzana	Tepper and Bar-Oz		2017-2020	A	104	1249-2		Light Fraction	0.5	114	חלמית	Malva sp.	צרת עלים/חצת-אונתי		חלמיתיים	Malvaceae	4	4
NZN-27	Nitzana	Tepper and Bar-Oz		2017-2020	A	104	1249-2		Light Fraction	0.5	115	לחך	Plantago sp.	זרע?	seed?	לחכיים	Plantaginaceae	1	1
NZN-27	Nitzana	Tepper and Bar-Oz		2017-2020	A	104	1249-2		Light Fraction	0.5	116	חרק
NZN-27	Nitzana	Tepper and Bar-Oz		2017-2020	A	104	1249-2		Light Fraction	0.5	117	מורכבים		זרעון				16	16
NZN-27	Nitzana	Tepper and Bar-Oz		2017-2020	A	104	1249-2		Light Fraction	0.5	118	דגני-זון?/שעורה		גרגיר?	grain	דגניים	Gramineae	1	1	להגדרה
NZN-27	Nitzana	Tepper and Bar-Oz		2017-2020	A	104	1249-2		Light Fraction	0.5	119	יבלית מצויה	Cynodon dactylon	זרע?		דגניים	Gramineae	10s	10s
NZN-27	Nitzana	Tepper and Bar-Oz		2017-2020	A	104	1249-2		Light Fraction	0.5	120	ליואל						7	7
NZN-27	Nitzana	Tepper and Bar-Oz		2017-2020	A	104	1249-2		Light Fraction	0.5	121	יבלית מצויה	Cynodon dactylon	זרע?		דגניים	Gramineae	20	10s
NZN-27	Nitzana	Tepper and Bar-Oz		2017-2020	A	104	1249-2		Light Fraction	0.5	122	בלתי - שונות						20	10s
NZN-28	Nitzana	Tepper and Bar-Oz		2017-2020	A	104	1249-2	3	Heavy Residue	2	1	שעורה	Hordeum	גרגיר	grain	דגניים	Gramineae	3	3	אחד שבור לשניים. חצאים אחרים לא נספרים
NZN-28	Nitzana	Tepper and Bar-Oz		2017-2020	A	104	1249-2	3	Heavy Residue	2	2	חיטה	Triticum	גרגיר	grain	דגניים	Gramineae	2	2
NZN-28	Nitzana	Tepper and Bar-Oz		2017-2020	A	104	1249-2	3	Heavy Residue	2	3	גפן	Vitis vinifera	חרצן	pip	גפניים	Vitaceae	3	3	לפי עוקצים. MNI=4
NZN-28	Nitzana	Tepper and Bar-Oz		2017-2020	A	104	1249-2	3	Heavy Residue	2	4	גפן	Vitis vinifera	עוקץ וזג	grapeskin and pedicel	גפניים	Vitaceae	5	1 + 4	אחד עוקץ 4זגים
NZN-27	Nitzana	Tepper and Bar-Oz		2017-2020	A	104	1249-2	3	Light Fraction	2	5	זית	Olea europaea	שבר גלעין	seed coat fragment	זיתיים	Oleaceae	1	1
NZN-28	Nitzana	Tepper and Bar-Oz		2017-2020	A	104	1249-2	3	Heavy Residue	2	6	רימון?	Punica granatum?	שבר קליפת הפרי	peel fragment	רימוניים	Lythraceae
NZN-28	Nitzana	Tepper and Bar-Oz		2017-2020	A	104	1249-2	3	Heavy Residue	2	7	בלתי								כולל אולי שברי אפרסק
NZN-28	Nitzana	Tepper and Bar-Oz		2017-2020	A	104	1249-2	3	Heavy Residue	2	8	גללים								גם אפר כנראה
NZN-29	Nitzana	Tepper and Bar-Oz		2017-2020	A	104	1252-2	3	Light Fraction	2	1	גפן	Vitis vinifera	חרצן	pip	גפניים	Vitaceae	6	6
NZN-29	Nitzana	Tepper and Bar-Oz		2017-2020	A	104	1252-2	3	Light Fraction	2	2	גפן	Vitis vinifera	עוקץ וזג	grapeskin and pedicel	גפניים	Vitaceae	2	1+1
NZN-29	Nitzana	Tepper and Bar-Oz		2017-2020	A	104	1252-2	3	Light Fraction	2	3			פרקי גבעול	culm nodes	דגניים	Gramineae	8	8
NZN-29	Nitzana	Tepper and Bar-Oz		2017-2020	A	104	1252-2	3	Light Fraction	2	4	קטנית?		פסיג	cotyledon	פרפרניים	Fabaceae	1	1
NZN-29	Nitzana	Tepper and Bar-Oz		2017-2020	A	104	1252-2	3	Light Fraction	2	5	חלמיתיים						2	2
NZN-29	Nitzana	Tepper and Bar-Oz		2017-2020	A	104	1252-2	3	Light Fraction	2	6	חבל
NZN-29	Nitzana	Tepper and Bar-Oz		2017-2020	A	104	1252-2	3	Light Fraction	2	7	תמר??		קליפה						תמר? השווה ל27-14 וכו
NZN-29	Nitzana	Tepper and Bar-Oz		2017-2020	A	104	1252-2	3	Light Fraction	2	8	רימון?		קליפה
NZN-29	Nitzana	Tepper and Bar-Oz		2017-2020	A	104	1252-2	3	Light Fraction	2	9	סילון?	Zilla?	קליפת הזרע	seed coat			1	1	שני חצאים
NZN-29	Nitzana	Tepper and Bar-Oz		2017-2020	A	104	1252-2	3	Light Fraction	2	10	דגן		שבר גרגיר	seed fragment
NZN-29	Nitzana	Tepper and Bar-Oz		2017-2020	A	104	1252-2	3	Light Fraction	2	11	בלתי		שבר קליפת הזרע	seed coat fragment					אולי יתחבר בהמשך
NZN-29	Nitzana	Tepper and Bar-Oz		2017-2020	A	104	1252-2	3	Light Fraction	2	12	שיער עזים
NZN-29	Nitzana	Tepper and Bar-Oz		2017-2020	A	104	1252-2	3	Light Fraction	2	13	גלל עם זרע
NZN-29	Nitzana	Tepper and Bar-Oz		2017-2020	A	104	1252-2	3	Light Fraction	2	14	גללים								מדגם קטן מתוך רבים
NZN-29	Nitzana	Tepper and Bar-Oz		2017-2020	A	104	1252-2	3	Light Fraction	2	15	זרע מגללים						1	1
NZN-29	Nitzana	Tepper and Bar-Oz		2017-2020	A	104	1252-2	3	Light Fraction	2	16	זרע מגללים						1	1
NZN-29	Nitzana	Tepper and Bar-Oz		2017-2020	A	104	1252-2	3	Light Fraction	2	17	זרע מגללים						7	7
NZN-30	Nitzana	Tepper and Bar-Oz		2017-2020	A	104	1252-2	3	Heavy Residue	2	1	בקיי להגדרה		זרע	seed	פרפרניים	Fabaceae	1	1	כדורי. להראות ליעל
NZN-30	Nitzana	Tepper and Bar-Oz		2017-2020	A	104	1252-2	3	Heavy Residue	2	2	בלתי-שונות								לא להתעסק
NZN-30	Nitzana	Tepper and Bar-Oz		2017-2020	A	104	1252-2	3	Heavy Residue	2	3	גלל								כאן כן לקחתי את כל מה שראיתי (עם העין) בניגוד ללייט פרקשין
NZN-31	Nitzana	Tepper and Bar-Oz		2017-2020	A	104	1258-2	3	Light Fraction	2	1	שעורה	Hordeum	גרגיר	grain	דגניים	Gramineae	1	1
NZN-31	Nitzana	Tepper and Bar-Oz		2017-2020	A	104	1258-2	3	Light Fraction	2	2	גפן	Vitis vinifera	חרצן	pip	גפניים	Vitaceae	1	1	שבר
NZN-31	Nitzana	Tepper and Bar-Oz		2017-2020	A	104	1258-2	3	Light Fraction	2	3			חלקי שדרה	rachis fragments	דגניים	Gramineae	1	1
NZN-31	Nitzana	Tepper and Bar-Oz		2017-2020	A	104	1258-2	3	Light Fraction	2	4			פרקי גבעול	culm nodes	דגניים	Gramineae	5	5
NZN-31	Nitzana	Tepper and Bar-Oz		2017-2020	A	104	1258-2	3	Light Fraction	2	5	זית	Olea europaea	חצי גלעין	seed coat half	זיתיים	Oleaceae	1	1
NZN-31	Nitzana	Tepper and Bar-Oz		2017-2020	A	104	1258-2	3	Light Fraction	2	6	בלתי-שונות								כולל קליפות דקות כמו הנ"ל
NZN-31	Nitzana	Tepper and Bar-Oz		2017-2020	A	104	1258-2	3	Light Fraction	2	7	גללים
NZN-32	Nitzana	Tepper and Bar-Oz		2017-2020	A	104	1258-2	3	Heavy Residue	2	1	שעורה	Hordeum	גרגיר	grain	דגניים	Gramineae	1	1	מכוסה אפר, שמתי גוש אפר להשוואה
NZN-32	Nitzana	Tepper and Bar-Oz		2017-2020	A	104	1258-2	3	Heavy Residue	2	2	חיטה	Triticum	גרגיר	grain	דגניים	Gramineae	1	1
NZN-32	Nitzana	Tepper and Bar-Oz		2017-2020	A	104	1258-2	3	Heavy Residue	2	3	בלתי						1	1
NZN-32	Nitzana	Tepper and Bar-Oz		2017-2020	A	104	1258-2	3	Heavy Residue	2	4	גללים?
NZN-33	Nitzana	Tepper and Bar-Oz		2017-2020	A	105	1241-1	3	Light Fraction	2	1	שעורה	Hordeum	גרגיר	grain	דגניים	Gramineae	6	6
NZN-33	Nitzana	Tepper and Bar-Oz		2017-2020	A	105	1241-1	3	Light Fraction	2	2	חיטה	Triticum	גרגיר	grain	דגניים	Gramineae	8	8
NZN-33	Nitzana	Tepper and Bar-Oz		2017-2020	A	105	1241-1	3	Light Fraction	2	3	חיטה/שעורה	Hordeum/Triticum	גרגיר	grain fragment	דגניים	Gramineae	1	1
NZN-33	Nitzana	Tepper and Bar-Oz		2017-2020	A	105	1241-1	3	Light Fraction	2	4	גפן	Vitis vinifera	חרצן	pip	גפניים	Vitaceae	8	8
NZN-33	Nitzana	Tepper and Bar-Oz		2017-2020	A	105	1241-1	3	Light Fraction	2	5	גפן	Vitis vinifera	עוקץ	pedicel	גפניים	Vitaceae	1	1	עם חתיכת זג
NZN-33	Nitzana	Tepper and Bar-Oz		2017-2020	A	105	1241-1	3	Light Fraction	2	6			פרקי גבעול	culm nodes	דגניים	Gramineae	11	11	אחד שורש
NZN-33	Nitzana	Tepper and Bar-Oz		2017-2020	A	105	1241-1	3	Light Fraction	2	7	זית	Olea europaea	שבר	fragment	זיתיים	Oleaceae	1	1
NZN-33	Nitzana	Tepper and Bar-Oz		2017-2020	A	105	1241-1	3	Light Fraction	2	8	עוקצר מצוי	Brachypodium distachyon	גרגיר	grain	דגניים	Gramineae	2	2
NZN-33	Nitzana	Tepper and Bar-Oz		2017-2020	A	105	1241-1	3	Light Fraction	2	9	בלתי								אפרסק??
NZN-33	Nitzana	Tepper and Bar-Oz		2017-2020	A	105	1241-1	3	Light Fraction	2	10			חלקי שדרה	rachis fragments	דגניים	Gramineae	1	1
NZN-33	Nitzana	Tepper and Bar-Oz		2017-2020	A	105	1241-1	3	Light Fraction	2	11	בלתי				?פרפרניים		1	1
NZN-33	Nitzana	Tepper and Bar-Oz		2017-2020	A	105	1241-1	3	Light Fraction	2	12	פרפרני		זרע	seed	פרפרניים	Fabaceae	1	1	לחבר בהמשך
NZN-33	Nitzana	Tepper and Bar-Oz		2017-2020	A	105	1241-1	3	Light Fraction	2	13	סלק מצוי cf.	cf. Beta vulgaris	זרע	seed			1	1
NZN-33	Nitzana	Tepper and Bar-Oz		2017-2020	A	105	1241-1	3	Light Fraction	2	14	בלתי		שבר קליפת הזרע	seed coat fragment			2	2
NZN-33	Nitzana	Tepper and Bar-Oz		2017-2020	A	105	1241-1	3	Light Fraction	2	15	בלתי						2	2
NZN-33	Nitzana	Tepper and Bar-Oz		2017-2020	A	105	1241-1	3	Light Fraction	2	16	בלתי-שונות								כולל קליפות רימון?
NZN-33	Nitzana	Tepper and Bar-Oz		2017-2020	A	105	1241-1	3	Light Fraction	2	17	גלל?								השוו לעיל
NZN-33	Nitzana	Tepper and Bar-Oz		2017-2020	A	105	1241-1	3	Light Fraction	2	18	גללים
NZN-34	Nitzana	Tepper and Bar-Oz		2017-2020	A	105	1241-1	3	Heavy Residue	2	1	שעורה	Hordeum	גרגיר	grain	דגניים	Gramineae	1	1
NZN-34	Nitzana	Tepper and Bar-Oz		2017-2020	A	105	1241-1	3	Heavy Residue	2	2	חיטה	Triticum	גרגיר	grain	דגניים	Gramineae	1	1
NZN-34	Nitzana	Tepper and Bar-Oz		2017-2020	A	105	1241-1	3	Heavy Residue	2	3	גפן	Vitis vinifera	חרצן	pip	גפניים	Vitaceae	1	1
NZN-34	Nitzana	Tepper and Bar-Oz		2017-2020	A	105	1241-1	3	Heavy Residue	2	4	טופח	Lathyrus sect. cicercula	זרע	seed	פרפרניים	Fabaceae	2	2
NZN-34	Nitzana	Tepper and Bar-Oz		2017-2020	A	105	1241-1	3	Heavy Residue	2	5	קטניות		פסיג	cotyledon	פרפרניים	Fabaceae	1	1	שניים, אחד פסיג השני לא בטוח
NZN-34	Nitzana	Tepper and Bar-Oz		2017-2020	A	105	1241-1	3	Heavy Residue	2	6	זית?	Olea europaea?	שבר קליפת הזרע	seed coat fragment	זיתיים	Oleaceae
NZN-34	Nitzana	Tepper and Bar-Oz		2017-2020	A	105	1241-1	3	Heavy Residue	2	7	תמר??		קליפה
NZN-34	Nitzana	Tepper and Bar-Oz		2017-2020	A	105	1241-1	3	Heavy Residue	2	8	בלתי-שונות
NZN-34	Nitzana	Tepper and Bar-Oz		2017-2020	A	105	1241-1	3	Heavy Residue	2	9	זרע בגלל
NZN-35	Nitzana	Tepper and Bar-Oz		2017-2020	A	106	1255-1	3	Light Fraction	2	1	שעורה	Hordeum	גרגיר	grain	דגניים	Gramineae	6	6
NZN-35	Nitzana	Tepper and Bar-Oz		2017-2020	A	106	1255-1	3	Light Fraction	2	2	חיטה	Triticum	גרגיר	grain	דגניים	Gramineae	12	12
NZN-35	Nitzana	Tepper and Bar-Oz		2017-2020	A	106	1255-1	3	Light Fraction	2	3	חיטה/שעורה	Hordeum/Triticum	שברי גרגיר	grain fragment	דגניים	Gramineae	3	3	יש ברי הכרעה?
NZN-35	Nitzana	Tepper and Bar-Oz		2017-2020	A	106	1255-1	3	Light Fraction	2	4	גפן	Vitis vinifera	חרצן	pip	גפניים	Vitaceae	3	3	MNI
NZN-35	Nitzana	Tepper and Bar-Oz		2017-2020	A	106	1255-1	3	Light Fraction	2	5			חלקי שדרה	rachis fragments	דגניים	Gramineae	3	3	3, 5 חלקים
NZN-35	Nitzana	Tepper and Bar-Oz		2017-2020	A	106	1255-1	3	Light Fraction	2	6			פרקי גבעול	culm nodes	דגניים	Gramineae	12	12	אחד שורש
NZN-35	Nitzana	Tepper and Bar-Oz		2017-2020	A	106	1255-1	3	Light Fraction	2	7	רימון מצוי	Punica granatum	זרע	seed	רימוניים	Lythraceae	2	2
NZN-35	Nitzana	Tepper and Bar-Oz		2017-2020	A	106	1255-1	3	Light Fraction	2	8	גפן	Vitis vinifera	זג	grapeskin	גפניים	Vitaceae	1	1
NZN-35	Nitzana	Tepper and Bar-Oz		2017-2020	A	106	1255-1	3	Light Fraction	2	9	זית	Olea europaea	גלעין	seed	זיתיים	Oleaceae	1	1	לבדוק
NZN-35	Nitzana	Tepper and Bar-Oz		2017-2020	A	106	1255-1	3	Light Fraction	2	10	בלתי		זרע	seed			1	1	אפשרות לחרוב
NZN-35	Nitzana	Tepper and Bar-Oz		2017-2020	A	106	1255-1	3	Light Fraction	2	11	בלתי		זרע	seed			1	1	יואל: אולי גפן??
NZN-35	Nitzana	Tepper and Bar-Oz		2017-2020	A	106	1255-1	3	Light Fraction	2	12	בקיים		שבר זרע	seed fragment	פרפרניים	Fabaceae	1	1	בקיה/טופח, לא ניתן להבחין
NZN-35	Nitzana	Tepper and Bar-Oz		2017-2020	A	106	1255-1	3	Light Fraction	2	13	בלתי-שונות
NZN-35	Nitzana	Tepper and Bar-Oz		2017-2020	A	106	1255-1	3	Light Fraction	2	14	גלל?						1	1	השווה לעיל
NZN-35	Nitzana	Tepper and Bar-Oz		2017-2020	A	106	1255-1	3	Light Fraction	2	15	גללים
NZN-35	Nitzana	Tepper and Bar-Oz		2017-2020	A	106	1255-1	3	Light Fraction	2	16	תמר	Phoenix dactylifera	גלעין	stone	דקליים	Palmae	1	1
NZN-36	Nitzana	Tepper and Bar-Oz		2017-2020	A	106	1255-1	3	Heavy Residue	2	1	גפן	Vitis vinifera	חרצן	pip	גפניים	Vitaceae	2	2
NZN-36	Nitzana	Tepper and Bar-Oz		2017-2020	A	106	1255-1	3	Heavy Residue	2	2	זית	Olea europaea	שבר קליפת הזרע	seed coat fragment	זיתיים	Oleaceae	1	1
NZN-36	Nitzana	Tepper and Bar-Oz		2017-2020	A	106	1255-1	3	Heavy Residue	2	3	טופח ספרדי	Lathyrus clymenum			פרפרניים	Fabaceae	1	1
NZN-36	Nitzana	Tepper and Bar-Oz		2017-2020	A	106	1255-1	3	Heavy Residue	2	4	Salsoleae	Salsoleae	פרק		זוגניים?	Zygophyllaceae?	1	1
NZN-36	Nitzana	Tepper and Bar-Oz		2017-2020	A	106	1255-1	3	Heavy Residue	2	5	אורן הצנובר	Pinus pinea	שבר קליפת הזרע	seed coat fragment
NZN-36	Nitzana	Tepper and Bar-Oz		2017-2020	A	106	1255-1	3	Heavy Residue	2	6	קטניות?		שברי זרע?	seed fragments?	פרפרניים?	Fabaceae?
NZN-36	Nitzana	Tepper and Bar-Oz		2017-2020	A	106	1255-1	3	Heavy Residue	2	7	בלתי								אפרסק??
NZN-36	Nitzana	Tepper and Bar-Oz		2017-2020	A	106	1255-1	3	Heavy Residue	2	8	בלתי-שונות								אולי פרק דגן עם שורש אחד
NZN-37	Nitzana	Tepper and Bar-Oz		2017-2020	A	107	1262-1	3	Light Fraction	2	1	שעורה	Hordeum	גרגיר	grain	דגניים	Gramineae	4	4
NZN-37	Nitzana	Tepper and Bar-Oz		2017-2020	A	107	1262-1	3	Light Fraction	2	2	חיטה	Triticum	גרגיר	grain	דגניים	Gramineae	3	3	לא מאה אחוז
NZN-37	Nitzana	Tepper and Bar-Oz		2017-2020	A	107	1262-1	3	Light Fraction	2	3	גפן	Vitis vinifera	חרצן	pip	גפניים	Vitaceae	4	4
NZN-37	Nitzana	Tepper and Bar-Oz		2017-2020	A	107	1262-1	3	Light Fraction	2	4			פרקי גבעול	culm nodes	דגניים	Gramineae	4	4	ועוד אחד שאולי שורש
NZN-37	Nitzana	Tepper and Bar-Oz		2017-2020	A	107	1262-1	3	Light Fraction	2	5	בלתי								שערות. אולי דקל
NZN-37	Nitzana	Tepper and Bar-Oz		2017-2020	A	107	1262-1	3	Light Fraction	2	6	בלתי-שונות
NZN-37	Nitzana	Tepper and Bar-Oz		2017-2020	A	107	1262-1	3	Light Fraction	2	7	גללים
NZN-37	Nitzana	Tepper and Bar-Oz		2017-2020	A	107	1262-1	3	Light Fraction	2	8	זון	Lolium sp.	גרגיר	grain	דגניים	Gramineae	1	1	להגדיר
NZN-38	Nitzana	Tepper and Bar-Oz		2017-2020	A	107	1262-1	3	Heavy Residue	2	1	בלתי		שבר קליפת הזרע	seed coat fragment			1	1	זית?
NZN-38	Nitzana	Tepper and Bar-Oz		2017-2020	A	107	1262-1	3	Heavy Residue	2	2	בלתי-שונות						3	3
NZN-39	Nitzana	Tepper and Bar-Oz		2017-2020	A	110	1300-1	3	Light Fraction	2	1	שעורה	Hordeum	גרגיר	grain	דגניים	Gramineae	5	5
NZN-39	Nitzana	Tepper and Bar-Oz		2017-2020	A	110	1300-1	3	Light Fraction	2	2	חיטה	Triticum	שבר גרגיר	grain	דגניים	Gramineae
NZN-39	Nitzana	Tepper and Bar-Oz		2017-2020	A	110	1300-1	3	Light Fraction	2	3	חיטה/שעורה	Hordeum/Triticum	שברי גרגיר	grain fragment	דגניים	Gramineae	3	3
NZN-39	Nitzana	Tepper and Bar-Oz		2017-2020	A	110	1300-1	3	Light Fraction	2	4	גפן	Vitis vinifera	שבר חרצן	pip	גפניים	Vitaceae
NZN-39	Nitzana	Tepper and Bar-Oz		2017-2020	A	110	1300-1	3	Light Fraction	2	5	גפן	Vitis vinifera	עוקץ	pedicel	גפניים	Vitaceae	1	1
NZN-39	Nitzana	Tepper and Bar-Oz		2017-2020	A	110	1300-1	3	Light Fraction	2	6			חלקי שדרה	rachis fragments	דגניים	Gramineae	2	2
NZN-39	Nitzana	Tepper and Bar-Oz		2017-2020	A	110	1300-1	3	Light Fraction	2	7			פרקי גבעול	culm nodes	דגניים	Gramineae	5	5	כולל שורשים
NZN-39	Nitzana	Tepper and Bar-Oz		2017-2020	A	110	1300-1	3	Light Fraction	2	8	סלק	Beta	פרודה		סלקיים	Chenopodiaceae	1	1	השווה לעיל, 29-5, 33-13
NZN-39	Nitzana	Tepper and Bar-Oz		2017-2020	A	110	1300-1	3	Light Fraction	2	9	cf. טופח ריסני	cf. Lathyrus blepharicarpos	זרע	seed	פרפרניים	Fabaceae	1	1	להגדיר
NZN-39	Nitzana	Tepper and Bar-Oz		2017-2020	A	110	1300-1	3	Light Fraction	2	10	בלתי		זרע	seed			2	2
NZN-39	Nitzana	Tepper and Bar-Oz		2017-2020	A	110	1300-1	3	Light Fraction	2	11	בלתי		חתיכת גבעול?				1	1
NZN-39	Nitzana	Tepper and Bar-Oz		2017-2020	A	110	1300-1	3	Light Fraction	2	12	בלתי		זרע	seed			1	1
NZN-39	Nitzana	Tepper and Bar-Oz		2017-2020	A	110	1300-1	3	Light Fraction	2	13	Salsoleae	Salsoleae	פרק				1	1
NZN-39	Nitzana	Tepper and Bar-Oz		2017-2020	A	110	1300-1	3	Light Fraction	2	14	תמר??		קליפה
NZN-39	Nitzana	Tepper and Bar-Oz		2017-2020	A	110	1300-1	3	Light Fraction	2	15	בלתי-שונות
NZN-40	Nitzana	Tepper and Bar-Oz		2017-2020	A	110	1300-1	3	Heavy Residue	2	1	גפן	Vitis vinifera	עוקץ	pedicel	גפניים	Vitaceae	1	1
NZN-40	Nitzana	Tepper and Bar-Oz		2017-2020	A	110	1300-1	3	Heavy Residue	2	2	cf. עדשה	cf. Lens culinaris	זרע	seed	פרפרניים	Fabaceae	1	1	מתאים אך אזור ההילום חסר
NZN-40	Nitzana	Tepper and Bar-Oz		2017-2020	A	110	1300-1	3	Heavy Residue	2	3	בקיים	Vicieae	זרע	seed	פרפרניים	Fabaceae	1	1	דומה לכרשינה אך יותר מדיי חלקים חסרים בשביל להגדיר
NZN-40	Nitzana	Tepper and Bar-Oz		2017-2020	A	110	1300-1	3	Heavy Residue	2	4	בלתי		זרע	seed			1	1	לחבר בהמשך
NZN-40	Nitzana	Tepper and Bar-Oz		2017-2020	A	110	1300-1	3	Heavy Residue	2	5	בלתי-שונות						6	6	כולל דגני אחד
NZN-41	Nitzana	Tepper and Bar-Oz		2017-2020	A	111	1308-1	3	Light Fraction	2	1	שעורה	Hordeum	גרגיר	grain	דגניים	Gramineae	4	4
NZN-41	Nitzana	Tepper and Bar-Oz		2017-2020	A	111	1308-1	3	Light Fraction	2	2	חיטה	Triticum	גרגיר	grain	דגניים	Gramineae	1	1
NZN-41	Nitzana	Tepper and Bar-Oz		2017-2020	A	111	1308-1	3	Light Fraction	2	3	חיטה/שעורה	Hordeum/Triticum	שברי גרגיר	grain fragment	דגניים	Gramineae
NZN-41	Nitzana	Tepper and Bar-Oz		2017-2020	A	111	1308-1	3	Light Fraction	2	4	גפן	Vitis vinifera	שבר חרצן	pip	גפניים	Vitaceae	1	1	אחד שורש
NZN-41	Nitzana	Tepper and Bar-Oz		2017-2020	A	111	1308-1	3	Light Fraction	2	5			פרקי גבעול	culm nodes	דגניים	Gramineae	1	1
NZN-41	Nitzana	Tepper and Bar-Oz		2017-2020	A	111	1308-1	3	Light Fraction	2	6	רימון מצוי	Punica granatum	שבר קליפה	rind fragment			1	1	לבדוק אם זה זרעים לא מפותחים
NZN-41	Nitzana	Tepper and Bar-Oz		2017-2020	A	111	1308-1	3	Light Fraction	2	7	בלתי		ענבה	fruit			2	2	לחבר בהמשך
NZN-41	Nitzana	Tepper and Bar-Oz		2017-2020	A	111	1308-1	3	Light Fraction	2	8	בלתי						1	1	לחבר בהמשך
NZN-41	Nitzana	Tepper and Bar-Oz		2017-2020	A	111	1308-1	3	Light Fraction	2	9	בלתי		זרע	seed			1	1	לחבר בהמשך
NZN-41	Nitzana	Tepper and Bar-Oz		2017-2020	A	111	1308-1	3	Light Fraction	2	10	כלך/כלכלך?		זרע	seed	Apiaceae	סוככי	2	2
NZN-41	Nitzana	Tepper and Bar-Oz		2017-2020	A	111	1308-1	3	Light Fraction	2	11	תמר??		קליפה
NZN-41	Nitzana	Tepper and Bar-Oz		2017-2020	A	111	1308-1	3	Light Fraction	2	12	זית	Olea europaea	שבר קליפת הזרע	seed coat fragment	זיתיים	Oleaceae
NZN-41	Nitzana	Tepper and Bar-Oz		2017-2020	A	111	1308-1	3	Light Fraction	2	13	בלתי
NZN-41	Nitzana	Tepper and Bar-Oz		2017-2020	A	111	1308-1	3	Light Fraction	2	14	בלתי-שונות
NZN-41	Nitzana	Tepper and Bar-Oz		2017-2020	A	111	1308-1	3	Light Fraction	2	15	גללים								גם מפוחם וגם יבש
NZN-42	Nitzana	Tepper and Bar-Oz		2017-2020	A	111	1308-1	3	Heavy Residue	2	1	cf. זית	cf. Olea europaea	שבר קליפת הזרע	seed coat fragment	זיתיים	Oleaceae	1	1	האיבר זה קשווה
NZN-42	Nitzana	Tepper and Bar-Oz		2017-2020	A	111	1308-1	3	Heavy Residue	2	2	בלתי-שונות
NZN-43	Nitzana	Tepper and Bar-Oz		2017-2020	A	112	1304-1	3	Light Fraction	2	1	שעורה	Hordeum	גרגיר	grain	דגניים	Gramineae	4	4	שני טיפוסים
NZN-43	Nitzana	Tepper and Bar-Oz		2017-2020	A	112	1304-1	3	Light Fraction	2	2	חיטה	Triticum	גרגיר	grain	דגניים	Gramineae	1	1
NZN-43	Nitzana	Tepper and Bar-Oz		2017-2020	A	112	1304-1	3	Light Fraction	2	3	גפן	Vitis vinifera	חרצן	pip	גפניים	Vitaceae	4	4	גדלים שונים
NZN-43	Nitzana	Tepper and Bar-Oz		2017-2020	A	112	1304-1	3	Light Fraction	2	4			פרקי גבעול	culm nodes	דגניים	Gramineae	4	4	אחד שורש כנראה
NZN-43	Nitzana	Tepper and Bar-Oz		2017-2020	A	112	1304-1	3	Light Fraction	2	5	דגני לזיהוי		גרגיר	grain	דגניים	Gramineae	1	1
NZN-43	Nitzana	Tepper and Bar-Oz		2017-2020	A	112	1304-1	3	Light Fraction	2	6	חבלבל cf. השדה	Convolvulus cf. arvensis	זרע	seed	חבלבליים	Convolvulaceae	1	1
NZN-43	Nitzana	Tepper and Bar-Oz		2017-2020	A	112	1304-1	3	Light Fraction	2	7	זית?	Olea europaea?	שבר קליפת הזרע	seed coat fragment	זיתיים	Oleaceae	1	1
NZN-43	Nitzana	Tepper and Bar-Oz		2017-2020	A	112	1304-1	3	Light Fraction	2	8	בלתי-שונות
NZN-43	Nitzana	Tepper and Bar-Oz		2017-2020	A	112	1304-1	3	Light Fraction	2	9	גללים
NZN-43	Nitzana	Tepper and Bar-Oz		2017-2020	A	112	1304-1	3	Light Fraction	2	10
NZN-44	Nitzana	Tepper and Bar-Oz		2017-2020	A	112	1304-1	3	Heavy Residue	2	1	חיטה	Triticum	גרגיר	grain	דגניים	Gramineae	2	2
NZN-44	Nitzana	Tepper and Bar-Oz		2017-2020	A	112	1304-1	3	Heavy Residue	2	2	חיטה/שעורה	Hordeum/Triticum	שברי גרגיר	grain fragment	דגניים	Gramineae
NZN-44	Nitzana	Tepper and Bar-Oz		2017-2020	A	112	1304-1	3	Heavy Residue	2	3	גפן	Vitis vinifera	שבר חרצן	pip	גפניים	Vitaceae	1	1	השברים ביחד=שלם
NZN-44	Nitzana	Tepper and Bar-Oz		2017-2020	A	112	1304-1	3	Heavy Residue	2	4	בלתי-שונות						2	2	אולי חלק מחרק קדום
NZN-44	Nitzana	Tepper and Bar-Oz		2017-2020	A	112	1304-1	3	Heavy Residue	2	5	גללים						20	עשרות	גללים של מכרסם כנראה
NZN-45	Nitzana	Tepper and Bar-Oz		2017-2020	A	113	1313-1	3	Light Fraction	2	1	שעורה	Hordeum	גרגיר	grain	דגניים	Gramineae	2	2
NZN-45	Nitzana	Tepper and Bar-Oz		2017-2020	A	113	1313-1	3	Light Fraction	2	2	חיטה	Triticum	גרגיר	grain	דגניים	Gramineae	1	1
NZN-45	Nitzana	Tepper and Bar-Oz		2017-2020	A	113	1313-1	3	Light Fraction	2	3	חיטה/שעורה	Hordeum/Triticum	שברי גרגיר	grain fragment	דגניים	Gramineae	1	1
NZN-45	Nitzana	Tepper and Bar-Oz		2017-2020	A	113	1313-1	3	Light Fraction	2	4	בלתי				מורכבים		1	1	מוכר מחלוצה
NZN-45	Nitzana	Tepper and Bar-Oz		2017-2020	A	113	1313-1	3	Light Fraction	2	5	קטנית		זרע	seed	פרפרניים	Fabaceae	1	1	. בוודאות לא עדשה או כרשינה או טופח. אולי יהיה אפשר לחבר בהמשך
NZN-45	Nitzana	Tepper and Bar-Oz		2017-2020	A	113	1313-1	3	Light Fraction	2	6	אמיך קוצני	Emex spinosa	פרי	fruit	ארכוביתיים	Polygonaceae	2	2
NZN-45	Nitzana	Tepper and Bar-Oz		2017-2020	A	113	1313-1	3	Light Fraction	2	7			פרקי גבעול	culm nodes	דגניים	Gramineae	4	4	אחד שורש
NZN-45	Nitzana	Tepper and Bar-Oz		2017-2020	A	113	1313-1	3	Light Fraction	2	8			גלומה	glume	דגניים	Gramineae	1	1	נראה רצנטי אך איך ייתכן?
NZN-45	Nitzana	Tepper and Bar-Oz		2017-2020	A	113	1313-1	3	Light Fraction	2	9			חלקי שדרה?	rachis fragments?	דגניים	Gramineae	1	1
NZN-45	Nitzana	Tepper and Bar-Oz		2017-2020	A	113	1313-1	3	Light Fraction	2	10	גפן	Vitis vinifera	זג	grapeskin	גפניים	Vitaceae	4	4
NZN-45	Nitzana	Tepper and Bar-Oz		2017-2020	A	113	1313-1	3	Light Fraction	2	11	בלתי						4	4	להראות ליואל
NZN-45	Nitzana	Tepper and Bar-Oz		2017-2020	A	113	1313-1	3	Light Fraction	2	12	תמר??		קליפה
NZN-45	Nitzana	Tepper and Bar-Oz		2017-2020	A	113	1313-1	3	Light Fraction	2	13	בלתי-שונות
NZN-45	Nitzana	Tepper and Bar-Oz		2017-2020	A	113	1313-1	3	Light Fraction	2	14	גללים
NZN-46	Nitzana	Tepper and Bar-Oz		2017-2020	A	113	1313-1	3	Heavy Residue	2	1	בלתי-שונות
NZN-47	Nitzana	Tepper and Bar-Oz		2017-2020	A	114	1317-1	3	Light Fraction	2	1	שעורה	Hordeum	גרגיר	grain	דגניים	Gramineae	3	3	אחד עטוי וקשה להיות בטוח
NZN-47	Nitzana	Tepper and Bar-Oz		2017-2020	A	114	1317-1	3	Light Fraction	2	2	חיטה	Triticum	גרגיר	grain	דגניים	Gramineae	1	1
NZN-47	Nitzana	Tepper and Bar-Oz		2017-2020	A	114	1317-1	3	Light Fraction	2	3	יפרוק המדבר?	Salsoleae	פרק				3	3
NZN-47	Nitzana	Tepper and Bar-Oz		2017-2020	A	114	1317-1	3	Light Fraction	2	4	תמר??		קליפה
NZN-47	Nitzana	Tepper and Bar-Oz		2017-2020	A	114	1317-1	3	Light Fraction	2	5	בלתי		גבעולים
NZN-47	Nitzana	Tepper and Bar-Oz		2017-2020	A	114	1317-1	3	Light Fraction	2	6	בלתי-שונות		קליפות
NZN-47	Nitzana	Tepper and Bar-Oz		2017-2020	A	114	1317-1	3	Light Fraction	2	7	גללים
NZN-47	Nitzana	Tepper and Bar-Oz		2017-2020	A	114	1317-1	3	Light Fraction	1	8	גפן	Vitis vinifera	חרצן	pip	גפניים	Vitaceae	2	2
NZN-47	Nitzana	Tepper and Bar-Oz		2017-2020	A	114	1317-1	3	Light Fraction	1	9	גפן	Vitis vinifera	עוקץ	pedicel	גפניים	Vitaceae	18	18
NZN-47	Nitzana	Tepper and Bar-Oz		2017-2020	A	114	1317-1	3	Light Fraction	1	10	בלתי		עוקץ	pedicel			3	3	גפן?
NZN-47	Nitzana	Tepper and Bar-Oz		2017-2020	A	114	1317-1	3	Light Fraction	1	11	שעורה שש-טורית	Hordeum vulgare subsp. hexastichum	פרק ציר שיבולת	rachis fragments	דגניים	Gramineae	2	2
NZN-47	Nitzana	Tepper and Bar-Oz		2017-2020	A	114	1317-1	3	Light Fraction	1	12	שעורה	Hordeum vulgare	פרק ציר שיבולת	rachis fragments	דגניים	Gramineae	1	1
NZN-47	Nitzana	Tepper and Bar-Oz		2017-2020	A	114	1317-1	3	Light Fraction	1	13	שעורה	Hordeum vulgare	פרק ציר שיבולת מגלל	rachis fragments with dung matrix	דגניים	Gramineae	1	1
NZN-47	Nitzana	Tepper and Bar-Oz		2017-2020	A	114	1317-1	3	Light Fraction	1	14	חיטה טטרפלוידית	Triticum turgidum s.l.	פרק ציר שיבולת	rachis fragments	דגניים	Gramineae	6	6
NZN-47	Nitzana	Tepper and Bar-Oz		2017-2020	A	114	1317-1	3	Light Fraction	1	15	חיטה	Triticum sp.	צווארון ופרק ראשון	culm collar and basal rachis	דגניים	Gramineae	1	1
NZN-47	Nitzana	Tepper and Bar-Oz		2017-2020	A	114	1317-1	3	Light Fraction	1	16	חיטה/שעורה	Hordeum/Triticum	בסיס ציר שיבולת	rachis fragments	דגניים	Gramineae	1	1
NZN-47	Nitzana	Tepper and Bar-Oz		2017-2020	A	114	1317-1	3	Light Fraction	1	17	דגני		פרק ציר שיבולת	rachis fragments	דגניים	Gramineae	1	1
NZN-47	Nitzana	Tepper and Bar-Oz		2017-2020	A	114	1317-1	3	Light Fraction	1	18			פרקי גבעול	culm nodes	דגניים	Gramineae	3	3
NZN-47	Nitzana	Tepper and Bar-Oz		2017-2020	A	114	1317-1	3	Light Fraction	1	19			שורשי דגן	roots	דגניים	Gramineae	1	1
NZN-47	Nitzana	Tepper and Bar-Oz		2017-2020	A	114	1317-1	3	Light Fraction	1	20	דגני		שברי מלען		דגניים	Gramineae
NZN-47	Nitzana	Tepper and Bar-Oz		2017-2020	A	114	1317-1	3	Light Fraction	1	21	מתנן שעיר	Thymelaea hirsuta	אגוזית	nutlet	מתנניים	Thymelaceae	3	3
NZN-47	Nitzana	Tepper and Bar-Oz		2017-2020	A	114	1317-1	3	Light Fraction	1	22	מתנן שעיר	Thymelaea hirsuta	עלה	leaf	מתנניים	Thymelaceae	153	153	רק 12 מפוחמים
NZN-47	Nitzana	Tepper and Bar-Oz		2017-2020	A	114	1317-1	3	Light Fraction	1	23	cf. סלק מצוי	cf. Beta vulgaris					1	1	יואל ראה
NZN-47	Nitzana	Tepper and Bar-Oz		2017-2020	A	114	1317-1	3	Light Fraction	1	24	חלמית	Malva	זרע	seed	חלמיתיים	Malvaceae	1	1
NZN-47	Nitzana	Tepper and Bar-Oz		2017-2020	A	114	1317-1	3	Light Fraction	1	25	ארנבית שרועה	Arnebia decumbrens	זרע	seed	זיפניים	Boraginaceae	1	1
NZN-47	Nitzana	Tepper and Bar-Oz		2017-2020	A	114	1317-1	3	Light Fraction	1	26	בר-עכנאי שיחני	Echiochilon fruticosum	זרע	seed	זיפניים	Boraginaceae	2	2
NZN-47	Nitzana	Tepper and Bar-Oz		2017-2020	A	114	1317-1	3	Light Fraction	1	27	שבר לבן	Peganum harmala	זרע	seed	זוגניים	Zygophyllaceae	2	2
NZN-47	Nitzana	Tepper and Bar-Oz		2017-2020	A	114	1317-1	3	Light Fraction	1	28	בן-שלח מנוצה	Erucaria microcarpa	מקור תרמיל				1	1
NZN-47	Nitzana	Tepper and Bar-Oz		2017-2020	A	114	1317-1	3	Light Fraction	1	29	שלוחית שעירה/קרחת	Andrachne telephioides/aspera	קשווה	valve	חלבלוביים	Euphorbiaceae	2	2
NZN-47	Nitzana	Tepper and Bar-Oz		2017-2020	A	114	1317-1	3	Light Fraction	1	30	Salsoleae	Salsoleae	פרק גבעול	segment	סלקיים	Chenopodiaceae	12	12
NZN-47	Nitzana	Tepper and Bar-Oz		2017-2020	A	114	1317-1	3	Light Fraction	1	31	בלתי להמשך						1	1
NZN-47	Nitzana	Tepper and Bar-Oz		2017-2020	A	114	1317-1	3	Light Fraction	1	32	אכילאה?	Achillea?	שבר תפרחת	inflorescence fragment	מורכבים	Asteraceae	1	1	לא מצאתי חיבור למין אכילאה באוסף
NZN-47	Nitzana	Tepper and Bar-Oz		2017-2020	A	114	1317-1	3	Light Fraction	1	33	לחבר בהמשך				סלקיים	Chenopodiaceae	1	1
NZN-47	Nitzana	Tepper and Bar-Oz		2017-2020	A	114	1317-1	3	Light Fraction	1	34	בלתי-שונות
NZN-47	Nitzana	Tepper and Bar-Oz		2017-2020	A	114	1317-1	3	Light Fraction	1	35	גללים
NZN-47	Nitzana	Tepper and Bar-Oz		2017-2020	A	114	1317-1	3	Light Fraction	1	36	עצם
NZN-48	Nitzana	Tepper and Bar-Oz		2017-2020	A	114	1317-1	3	Heavy Residue	2	1	בלתי-שונות
NZN-49	Nitzana	Tepper and Bar-Oz		2017-2020	A	115	1345-1	3	Light Fraction	2	1	שעורה	Hordeum	גרגיר	grain	דגניים	Gramineae	3	3
NZN-49	Nitzana	Tepper and Bar-Oz		2017-2020	A	115	1345-1	3	Light Fraction	2	2	גפן	Vitis vinifera	חרצן	pip	גפניים	Vitaceae	1	1
NZN-49	Nitzana	Tepper and Bar-Oz		2017-2020	A	115	1345-1	3	Light Fraction	2	3			פרקי גבעול	culm nodes	דגניים	Gramineae	2	2
NZN-49	Nitzana	Tepper and Bar-Oz		2017-2020	A	115	1345-1	3	Light Fraction	2	4	בלתי		קליפה
NZN-49	Nitzana	Tepper and Bar-Oz		2017-2020	A	115	1345-1	3	Light Fraction	2	5	בלתי-שונות
NZN-49	Nitzana	Tepper and Bar-Oz		2017-2020	A	115	1345-1	3	Light Fraction	2	6	גללים
NZN-50	Nitzana	Tepper and Bar-Oz		2017-2020	A	115	1345-1	3	Heavy Residue	2	1	בלתי-שונות
NZN-50	Nitzana	Tepper and Bar-Oz		2017-2020	A	115	1345-1	3	Heavy Residue	2	2	גללים
NZN-51	Nitzana	Tepper and Bar-Oz		2017-2020	A	117	1357-1	3	Light Fraction	2	1	שעורה	Hordeum	גרגיר	grain	דגניים	Gramineae	3	3
NZN-51	Nitzana	Tepper and Bar-Oz		2017-2020	A	117	1357-1	3	Light Fraction	2	2	חיטה	Triticum	גרגיר	grain	דגניים	Gramineae	1	1	כולל שברים בפנים
NZN-51	Nitzana	Tepper and Bar-Oz		2017-2020	A	117	1357-1	3	Light Fraction	2	3	גפן	Vitis vinifera	חרצן	pip	גפניים	Vitaceae	3	3
NZN-51	Nitzana	Tepper and Bar-Oz		2017-2020	A	117	1357-1	3	Light Fraction	2	4			פרקי גבעול	culm nodes	דגניים	Gramineae	1	1
NZN-51	Nitzana	Tepper and Bar-Oz		2017-2020	A	117	1357-1	3	Light Fraction	2	5	אמיך קוצני	Emex spinosa	פרי	fruit	ארכוביתיים	Polygonaceae	1	1
NZN-51	Nitzana	Tepper and Bar-Oz		2017-2020	A	117	1357-1	3	Light Fraction	2	6	מתנן שעיר	Thymelaea hirsuta	ענף עם עלים	branch with leaves	מתנניים	Thymelaceae			מדהים
NZN-51	Nitzana	Tepper and Bar-Oz		2017-2020	A	117	1357-1	3	Light Fraction	2	7	בלתי						3	3
NZN-51	Nitzana	Tepper and Bar-Oz		2017-2020	A	117	1357-1	3	Light Fraction	2	8	תמר?		קליפה
NZN-51	Nitzana	Tepper and Bar-Oz		2017-2020	A	117	1357-1	3	Light Fraction	2	9	בלתי-שונות
NZN-51	Nitzana	Tepper and Bar-Oz		2017-2020	A	117	1357-1	3	Light Fraction	2	10	גללים
NZN-51	Nitzana	Tepper and Bar-Oz		2017-2020	A	117	1357-1	3	Light Fraction	1	11	?שעורה שש-טורית	cf. Hordeum vulgare subsp. hexastichum	פרק ציר שיבולת	rachis fragments	דגניים	Gramineae	2	2	לחבר בהמשך
NZN-51	Nitzana	Tepper and Bar-Oz		2017-2020	A	117	1357-1	3	Light Fraction	1	12	?שעורה דו-טורית/התבור	cf. Hordeum vulgare subsp. disticum/spontaneum	פרק ציר שיבולת	rachis fragments	דגניים	Gramineae	1	1	לחבר בהמשך
NZN-51	Nitzana	Tepper and Bar-Oz		2017-2020	A	117	1357-1	3	Light Fraction	1	13	שעורה	Hordeum sp.	פרק ציר שיבולת	rachis fragments	דגניים	Gramineae	7	7
NZN-51	Nitzana	Tepper and Bar-Oz		2017-2020	A	117	1357-1	3	Light Fraction	1	14	דגני		פרק ציר שיבולת	rachis fragments	דגניים	Gramineae	1	1	לחבר בהמשך
NZN-51	Nitzana	Tepper and Bar-Oz		2017-2020	A	117	1357-1	3	Light Fraction	1	15	חיטה טטרפלוידית	Triticum turgidum s.l.	פרק ציר שיבולת	rachis fragments	דגניים	Gramineae	8	8
NZN-51	Nitzana	Tepper and Bar-Oz		2017-2020	A	117	1357-1	3	Light Fraction	1	16	חיטה/שעורה	Hordeum/Triticum	פרק ציר שיבולת	rachis fragments	דגניים	Gramineae	10	10
NZN-51	Nitzana	Tepper and Bar-Oz		2017-2020	A	117	1357-1	3	Light Fraction	1	17	חיטה/שעורה	Hordeum/Triticum	בסיס ציר שיבולת	basal rachis segment	דגניים	Gramineae	2	2
NZN-51	Nitzana	Tepper and Bar-Oz		2017-2020	A	117	1357-1	3	Light Fraction	1	18	בלתי		עוקץ				1	1
NZN-51	Nitzana	Tepper and Bar-Oz		2017-2020	A	117	1357-1	3	Light Fraction	1	19	גפן	Vitis vinifera	אנדוספרם	endosperm	גפניים	Vitaceae	2	2
NZN-51	Nitzana	Tepper and Bar-Oz		2017-2020	A	117	1357-1	3	Light Fraction	1	20	גפן	Vitis vinifera	עוקץ	pedicel	גפניים	Vitaceae	7	7
NZN-51	Nitzana	Tepper and Bar-Oz		2017-2020	A	117	1357-1	3	Light Fraction	1	21	מלעניאל? ש"ש?		מלען				1	1	לחבר בהמשך
NZN-51	Nitzana	Tepper and Bar-Oz		2017-2020	A	117	1357-1	3	Light Fraction	1	22	פרפרני קטן		זרע	seed	פרפרניים	Fabaceae	1	1	לא להתעסק
NZN-51	Nitzana	Tepper and Bar-Oz		2017-2020	A	117	1357-1	3	Light Fraction	1	23	מתנן מצוי/צמיר	Thymelaea passerina/gussonei	אגוזית	nutlet	מתנניים	Thymelaceae	1	1
NZN-51	Nitzana	Tepper and Bar-Oz		2017-2020	A	117	1357-1	3	Light Fraction	1	24	מתנן שעיר	Thymelaea hirsuta	אגוזית	nutlet	מתנניים	Thymelaceae	6	6
NZN-51	Nitzana	Tepper and Bar-Oz		2017-2020	A	117	1357-1	3	Light Fraction	1	25	מתנן שעיר	Thymelaea hirsuta	עלה	leaf	מתנניים	Thymelaceae	51	51	19 לא מפוחמים
NZN-51	Nitzana	Tepper and Bar-Oz		2017-2020	A	117	1357-1	3	Light Fraction	1	26	מתנן שעיר	Thymelaea hirsuta	ענף פורה עם עלים	bud with leaves	מתנניים	Thymelaceae	2	2
NZN-51	Nitzana	Tepper and Bar-Oz		2017-2020	A	117	1357-1	3	Light Fraction	1	27	מתנן שעיר	Thymelaea hirsuta	ענף עם עלים	branch with leaves	מתנניים	Thymelaceae	7	7
NZN-51	Nitzana	Tepper and Bar-Oz		2017-2020	A	117	1357-1	3	Light Fraction	1	28	?מתנן שעיר	cf. Thymelaea hirsuta	פרח	flower	מתנניים	Thymelaceae	2	2
NZN-51	Nitzana	Tepper and Bar-Oz		2017-2020	A	117	1357-1	3	Light Fraction	1	29	חלמית קטנת-פרחים/חדת-אונות	Malva parviflora/oxyloba	זרע	seed	חלמיתיים	Malvaceae	1	1
NZN-51	Nitzana	Tepper and Bar-Oz		2017-2020	A	117	1357-1	3	Light Fraction	1	30	ציפרני החתול	Calendula sp.	זרע	seed	מורכבים	Asteraceae	1	1
NZN-51	Nitzana	Tepper and Bar-Oz		2017-2020	A	117	1357-1	3	Light Fraction	1	31	לחך	Plantago sp.	זרע	seed	לחכיים	Plantaginaceae	1	1	לחבר בהמשך
NZN-51	Nitzana	Tepper and Bar-Oz		2017-2020	A	117	1357-1	3	Light Fraction	1	32	ארנבית שרועה	Arnebia decumbrens	זרע	seed	זיפניים	Boraginaceae	1	1
NZN-51	Nitzana	Tepper and Bar-Oz		2017-2020	A	117	1357-1	3	Light Fraction	1	33	בר-עכנאי שיחני	Echiochilon fruticosum	זרע	seed	זיפניים	Boraginaceae	1	1
NZN-51	Nitzana	Tepper and Bar-Oz		2017-2020	A	117	1357-1	3	Light Fraction	1	34	גבסנית שעירה	Gypsophila pilosa	זרע	seed	ציפורניים	Caryophyllaceae	1	1
NZN-51	Nitzana	Tepper and Bar-Oz		2017-2020	A	117	1357-1	3	Light Fraction	1	35	בלתי		זרע	seed			2	2	מזכיר חלמית קטנה אך הוא לא. ראה מח' 2 עמ' 98
NZN-51	Nitzana	Tepper and Bar-Oz		2017-2020	A	117	1357-1	3	Light Fraction	1	36	פרקים סלקיים		פרקים	scales	סלקיים	Chenopodiaceae	3	3
NZN-51	Nitzana	Tepper and Bar-Oz		2017-2020	A	117	1357-1	3	Light Fraction	1	37	אשל הפרקים	Tamarix aphylla	פרקים	scales	אשליים	Tamaricaceae	2	2
NZN-51	Nitzana	Tepper and Bar-Oz		2017-2020	A	117	1357-1	3	Light Fraction	1	38	בלתי		ענף פורה עם עלים	branch in bloom			1	1	אולי אשל
NZN-51	Nitzana	Tepper and Bar-Oz		2017-2020	A	117	1357-1	3	Light Fraction	1	39	קטנית מרובעת						1	1
NZN-51	Nitzana	Tepper and Bar-Oz		2017-2020	A	117	1357-1	3	Light Fraction	1	40	פרגה	Glaucium sp.	זרע	seed	פרגיים	Papaveraceae	1	1	יכול להיות פרגה ערבית, מקרינה, או אדומה. ראו עמ' 97 במחברת 2
NZN-51	Nitzana	Tepper and Bar-Oz		2017-2020	A	117	1357-1	3	Light Fraction	1	41	cf. אשליל	cf. Reaumuria sp.	ניצן של ענף	bud	אשליים	Tamaricaceae	1	1
NZN-51	Nitzana	Tepper and Bar-Oz		2017-2020	A	117	1357-1	3	Light Fraction	1	42	שבר לבן	Peganum harmala	זרע	seed	זוגניים	Zygophyllaceae	4	4
NZN-51	Nitzana	Tepper and Bar-Oz		2017-2020	A	117	1357-1	3	Light Fraction	1	43	חמד המדבר??	Salsoleae	פרק גבעול	stem fragment	סלקיים	Chenopodiaceae	1	1	לאסוף עוד...
NZN-51	Nitzana	Tepper and Bar-Oz		2017-2020	A	117	1357-1	3	Light Fraction	1	44	שלוחית שעירה/קרחת	Andrachne telephioides/aspera	קשווה	valve	חלבלוביים	Euphorbiaceae	3	3	עמ' 98
NZN-51	Nitzana	Tepper and Bar-Oz		2017-2020	A	117	1357-1	3	Light Fraction	1	45	עשנן cf. קטן	Fumaria cf. parviflora	אגוזית	nutlet	עשנניים	Fumariaceae
NZN-51	Nitzana	Tepper and Bar-Oz		2017-2020	A	117	1357-1	3	Light Fraction	1	46	סבונית השדות	Vaccaria hispanica	זרע	seed	ציפורניים	Caryophyllaceae	1	1
NZN-51	Nitzana	Tepper and Bar-Oz		2017-2020	A	117	1357-1	3	Light Fraction	1	47	בלתי-שונות								כולל תמר כנראה ואלי פרק גבעול של דגני
NZN-51	Nitzana	Tepper and Bar-Oz		2017-2020	A	117	1357-1	3	Light Fraction	1	48	גללים		שברי גלל
NZN-51	Nitzana	Tepper and Bar-Oz		2017-2020	A	117	1357-1	3	Light Fraction	1	49	חרק
NZN-51	Nitzana	Tepper and Bar-Oz		2017-2020	A	117	1357-1	3	Light Fraction	1	50	דגני		שברי מלען		דגניים	Gramineae
NZN-51	Nitzana	Tepper and Bar-Oz		2017-2020	A	117	1357-1	3	Light Fraction	1	51	חרצית רצנטית
NZN-51	Nitzana	Tepper and Bar-Oz		2017-2020	A	117	1357-1	3	Light Fraction	1	52	עצמות
NZN-51	Nitzana	Tepper and Bar-Oz		2017-2020	A	117	1357-1		Light Fraction	0.5	53	פרפרני - תלתן?		זרע?		פרפרניים	Fabaceae	1	1
NZN-51	Nitzana	Tepper and Bar-Oz		2017-2020	A	117	1357-1		Light Fraction	0.5	54	גפן	Vitis vinifera	שבר חרצן		גפניים	Vitaceae	7	7
NZN-51	Nitzana	Tepper and Bar-Oz		2017-2020	A	117	1357-1		Light Fraction	0.5	55	דגני			rachis fragments	דגניים	Gramineae	7	7
NZN-51	Nitzana	Tepper and Bar-Oz		2017-2020	A	117	1357-1		Light Fraction	0.5	56	קוטנדיה?	Cutandia	זרע?		דגניים	Gramineae	1	1	דגני להגדרה
NZN-51	Nitzana	Tepper and Bar-Oz		2017-2020	A	117	1357-1		Light Fraction	0.5	57	יבלית מצויה	Cynodon dactylon	זרע?		דגניים	Gramineae	5	5
NZN-51	Nitzana	Tepper and Bar-Oz		2017-2020	A	117	1357-1		Light Fraction	0.5	58	מתנן שעיר	Thymelaea hirsuta	ניצן	bud	מתנניים	Thymelaceae	2	2
NZN-51	Nitzana	Tepper and Bar-Oz		2017-2020	A	117	1357-1		Light Fraction	0.5	59	ציפרנית				מורכבים	Asteraceae	2	2	להגדרה
NZN-51	Nitzana	Tepper and Bar-Oz		2017-2020	A	117	1357-1		Light Fraction	0.5	60	מתנן שעיר	Thymelaea hirsuta	עלה	leaf	מתנניים	Thymelaceae
NZN-51	Nitzana	Tepper and Bar-Oz		2017-2020	A	117	1357-1		Light Fraction	0.5	61	ציפרני החתול?	Calendula sp.			מורכבים	Asteraceae	1	1
NZN-51	Nitzana	Tepper and Bar-Oz		2017-2020	A	117	1357-1		Light Fraction	0.5	62	פרגה	Glaucium sp.	זרע?				1	1
NZN-51	Nitzana	Tepper and Bar-Oz		2017-2020	A	117	1357-1		Light Fraction	0.5	63	מלען וגלומה		שברים				8	8
NZN-51	Nitzana	Tepper and Bar-Oz		2017-2020	A	117	1357-1		Light Fraction	0.5	64	מרגנית	Anagallis arvensis L.?	זרע				1	1
NZN-51	Nitzana	Tepper and Bar-Oz		2017-2020	A	117	1357-1		Light Fraction	0.5	65	אשל הפרקים	Tamarix aphylla		segment	אשליים	Tamaricaceae	4	4
NZN-51	Nitzana	Tepper and Bar-Oz		2017-2020	A	117	1357-1		Light Fraction	0.5	66	שלוחית שעירה/קרחת	Andrachne telephioides/aspera	זרע?		חלבלוביים	Euphorbiaceae	4	4
NZN-51	Nitzana	Tepper and Bar-Oz		2017-2020	A	117	1357-1		Light Fraction	0.5	67	חרק						1	1
NZN-51	Nitzana	Tepper and Bar-Oz		2017-2020	A	117	1357-1		Light Fraction	0.5	68	חיעד ספרדי	Aizoon hispanicum L.	זרע?	seed?	חיעדיים	Aizoaceae	1	1
NZN-51	Nitzana	Tepper and Bar-Oz		2017-2020	A	117	1357-1		Light Fraction	0.5	69	דג - חולייה וקשקש
NZN-51	Nitzana	Tepper and Bar-Oz		2017-2020	A	117	1357-1		Light Fraction	0.5	70	ליואל
NZN-51	Nitzana	Tepper and Bar-Oz		2017-2020	A	117	1357-1		Light Fraction	0.5	71	בלתי - שונות
NZN-52	Nitzana	Tepper and Bar-Oz		2017-2020	A	117	1357-1	3	Heavy Residue		1	גפן	Vitis vinifera	שבר חרצן	pip fragment	גפניים	Vitaceae
NZN-52	Nitzana	Tepper and Bar-Oz		2017-2020	A	117	1357-1	3	Heavy Residue		2	מתנן שעיר	Thymelaea hirsuta	עלה	leaf	מתנניים	Thymelaceae	1	1
NZN-53	Nitzana	Tepper and Bar-Oz		2017-2020	A	118	1379	3	Light Fraction	2	1	שעורה	Hordeum	גרגיר	grain	דגניים	Gramineae	2	2
NZN-53	Nitzana	Tepper and Bar-Oz		2017-2020	A	118	1379	3	Light Fraction	2	2	חיטה	Triticum	גרגיר	grain	דגניים	Gramineae	3	3
NZN-53	Nitzana	Tepper and Bar-Oz		2017-2020	A	118	1379	3	Light Fraction	2	3	חיטה/שעורה	Hordeum/Triticum	גרגיר	grain	דגניים	Gramineae	1	1
NZN-53	Nitzana	Tepper and Bar-Oz		2017-2020	A	118	1379	3	Light Fraction	2	4	גפן	Vitis vinifera	חרצן	pip	גפניים	Vitaceae	13	13
NZN-53	Nitzana	Tepper and Bar-Oz		2017-2020	A	118	1379	3	Light Fraction	2	5			פרקי גבעול	culm nodes	דגניים	Gramineae	7	7
NZN-53	Nitzana	Tepper and Bar-Oz		2017-2020	A	118	1379	3	Light Fraction	2	6	בקיי	Vicieae	זרע	seed	פרפרניים	Fabaceae	1	1	לא להתעסק
NZN-53	Nitzana	Tepper and Bar-Oz		2017-2020	A	118	1379	3	Light Fraction	2	7	עוקצר מצוי	Brachypodium distachyon	גרגיר	grain	דגניים	Gramineae	1	1
NZN-53	Nitzana	Tepper and Bar-Oz		2017-2020	A	118	1379	3	Light Fraction	2	8	רימון מצוי	Punica granatum	זרע	seed	רימוניים	Lythraceae	1	1
NZN-53	Nitzana	Tepper and Bar-Oz		2017-2020	A	118	1379	3	Light Fraction	2	9	סילון?	Zilla?					1	1
NZN-53	Nitzana	Tepper and Bar-Oz		2017-2020	A	118	1379	3	Light Fraction	2	10	בלתי						1	1
NZN-53	Nitzana	Tepper and Bar-Oz		2017-2020	A	118	1379	3	Light Fraction	2	11	גפן	Vitis vinifera	זג	grape skin	גפניים	Vitaceae	1	1		מועמד לפטריות
NZN-53	Nitzana	Tepper and Bar-Oz		2017-2020	A	118	1379	3	Light Fraction	2	12	רימון מצוי	Punica granatum	שבר קליפת הפרי	peel fragment	רימוניים	Lythraceae			גם דגם נקוד בחוץ וגם שקעי זרעים בפנים
NZN-53	Nitzana	Tepper and Bar-Oz		2017-2020	A	118	1379	3	Light Fraction	2	13	בלתי						1	1	מזכיר חציל
NZN-53	Nitzana	Tepper and Bar-Oz		2017-2020	A	118	1379	3	Light Fraction	2	14	בלתי-שונות
NZN-53	Nitzana	Tepper and Bar-Oz		2017-2020	A	118	1379	3	Light Fraction	2	15	גללים
NZN-53	Nitzana	Tepper and Bar-Oz		2017-2020	A	118	1379	3	Light Fraction	1	16	גפן	Vitis vinifera	חרצן	pip	גפניים	Vitaceae	6	6	לפי MNI
NZN-53	Nitzana	Tepper and Bar-Oz		2017-2020	A	118	1379	3	Light Fraction	1	17	גפן	Vitis vinifera	עוקץ	pedicel	גפניים	Vitaceae	32	32
NZN-53	Nitzana	Tepper and Bar-Oz		2017-2020	A	118	1379	3	Light Fraction	1	18	חיטה/בן-חיטה		גרגיר	grain	דגניים	Gramineae	2	2
NZN-53	Nitzana	Tepper and Bar-Oz		2017-2020	A	118	1379	3	Light Fraction	1	19	שעורה נימית/החוף?/מכחילה?		גרגיר	grain	דגניים	Gramineae	1	1
NZN-53	Nitzana	Tepper and Bar-Oz		2017-2020	A	118	1379	3	Light Fraction	1	20	חפורית קטנה?		גרגיר	grain	דגניים	Gramineae	1	1
NZN-53	Nitzana	Tepper and Bar-Oz		2017-2020	A	118	1379	3	Light Fraction	1	21	דגני לזיהוי		גרגיר	grain	דגניים	Gramineae	1	1
NZN-53	Nitzana	Tepper and Bar-Oz		2017-2020	A	118	1379	3	Light Fraction	1	22	דגני לזיהוי		גרגיר	grain	דגניים	Gramineae	18	18
NZN-53	Nitzana	Tepper and Bar-Oz		2017-2020	A	118	1379	3	Light Fraction	1	23	דגני		גרגיר	grain	דגניים	Gramineae	2	2
NZN-53	Nitzana	Tepper and Bar-Oz		2017-2020	A	118	1379	3	Light Fraction	1	24	שעורה שש-טורית	Hordeum vulgare subsp. hexastichum	פרק ציר שיבולת	rachis fragments	דגניים	Gramineae	1	1	יהיו עוד
NZN-53	Nitzana	Tepper and Bar-Oz		2017-2020	A	118	1379	3	Light Fraction	1	25	שעורה דו-טורית/התבור	Hordeum vulgare subsp. disticum/spontaneum	פרק ציר שיבולת	rachis fragments	דגניים	Gramineae	1	1	יהיו עוד
NZN-53	Nitzana	Tepper and Bar-Oz		2017-2020	A	118	1379	3	Light Fraction	1	26	חיטת הלחם	Triticum aestivum	פרק ציר שיבולת	rachis fragments	דגניים	Gramineae	9	9	יהיו עוד
NZN-53	Nitzana	Tepper and Bar-Oz		2017-2020	A	118	1379	3	Light Fraction	1	27	חיטה טטרפלוידית	Triticum turgidum s.l.	פרק ציר שיבולת	rachis fragments	דגניים	Gramineae	22	22	יהיו עוד	לבדוק שוב
NZN-53	Nitzana	Tepper and Bar-Oz		2017-2020	A	118	1379	3	Light Fraction	1	28	חיטה/שעורה	Hordeum/Triticum	פרק ציר שיבולת	rachis fragments	דגניים	Gramineae	37	37	יהיו פחות
NZN-53	Nitzana	Tepper and Bar-Oz		2017-2020	A	118	1379	3	Light Fraction	1	29	שיבולת שועל?		פרק ציר שיבולת	rachis fragments	דגניים	Gramineae	2	2
NZN-53	Nitzana	Tepper and Bar-Oz		2017-2020	A	118	1379	3	Light Fraction	1	30			פרקי גבעול	culm nodes	דגניים	Gramineae	13	13
NZN-53	Nitzana	Tepper and Bar-Oz		2017-2020	A	118	1379	3	Light Fraction	1	31			שרשי דגן	roots	דגניים	Gramineae	3	3
NZN-53	Nitzana	Tepper and Bar-Oz		2017-2020	A	118	1379	3	Light Fraction	1	32	גפן	Vitis vinifera	עוקץ	pedicel	גפניים	Vitaceae	1	1
NZN-53	Nitzana	Tepper and Bar-Oz		2017-2020	A	118	1379	3	Light Fraction	1	33	פיקוס התאנה	Ficus carica	אגוזית	nutlet	תותיים	Moraceae	1	1
NZN-53	Nitzana	Tepper and Bar-Oz		2017-2020	A	118	1379	3	Light Fraction	1	34	גרגרנית ערבית?						4	4
NZN-53	Nitzana	Tepper and Bar-Oz		2017-2020	A	118	1379	3	Light Fraction	1	35	מתנן שעיר	Thymelaea hirsuta	אגוזית	nutlet	מתנניים	Thymelaceae	2	2
NZN-53	Nitzana	Tepper and Bar-Oz		2017-2020	A	118	1379	3	Light Fraction	1	36	מתנן שעיר	Thymelaea hirsuta	עלה	leaf	מתנניים	Thymelaceae	9	9
NZN-53	Nitzana	Tepper and Bar-Oz		2017-2020	A	118	1379	3	Light Fraction	1	37	ציפרני החתול	Calendula sp.	זרע	seed	מורכבים	Asteraceae	1	1
NZN-53	Nitzana	Tepper and Bar-Oz		2017-2020	A	118	1379	3	Light Fraction	1	38	חלמית להגדרה		זרע	seed	חלמיתיים	Malvaceae	11	11
NZN-53	Nitzana	Tepper and Bar-Oz		2017-2020	A	118	1379	3	Light Fraction	1	39	בר-עכנאי?						1	1
NZN-53	Nitzana	Tepper and Bar-Oz		2017-2020	A	118	1379	3	Light Fraction	1	40	פרק סלקי?						1	1
NZN-53	Nitzana	Tepper and Bar-Oz		2017-2020	A	118	1379	3	Light Fraction	1	41	שונות ליואל
NZN-53	Nitzana	Tepper and Bar-Oz		2017-2020	A	118	1379	3	Light Fraction	1	42	בלתי
NZN-53	Nitzana	Tepper and Bar-Oz		2017-2020	A	118	1379	3	Light Fraction	1	43	בלתי-שונות								כולל חוליה של דג
NZN-53	Nitzana	Tepper and Bar-Oz		2017-2020	A	118	1379	3	Light Fraction	1	44	יבלית מצויה בתוך גלל
NZN-53	Nitzana	Tepper and Bar-Oz		2017-2020	A	118	1379	3	Light Fraction	1	45	דגני בתוך גלל
NZN-53	Nitzana	Tepper and Bar-Oz		2017-2020	A	118	1379	3	Light Fraction	1	46	גלל		שברי גלל						נאסף הכל המהמדגם
NZN-54	Nitzana	Tepper and Bar-Oz		2017-2020	A	118	1379	3	Heavy Residue	2	1	חיטה?	Triticum	גרגיר	grain	דגניים	Gramineae	1	1
NZN-54	Nitzana	Tepper and Bar-Oz		2017-2020	A	118	1379	3	Heavy Residue	2	2	גפן	Vitis vinifera	חרצן	pip	גפניים	Vitaceae	1	1
NZN-54	Nitzana	Tepper and Bar-Oz		2017-2020	A	118	1379	3	Heavy Residue	2	3			פרקי גבעול	culm nodes	דגניים	Gramineae	1	1
NZN-54	Nitzana	Tepper and Bar-Oz		2017-2020	A	118	1379	3	Heavy Residue	2	4	בלתי-שונות
NZN-54	Nitzana	Tepper and Bar-Oz		2017-2020	A	118	1379	3	Heavy Residue	2	5	גללים								גללים של מכרסם כנראה השווה NZN-44
NZN-55	Nitzana	Tepper and Bar-Oz		2017-2020	A	118	1380	3	Light Fraction	2	1	שעורה	Hordeum	גרגיר	grain	דגניים	Gramineae	6	6
NZN-55	Nitzana	Tepper and Bar-Oz		2017-2020	A	118	1380	3	Light Fraction	2	2	חיטה	Triticum	גרגיר	grain	דגניים	Gramineae	2	2
NZN-55	Nitzana	Tepper and Bar-Oz		2017-2020	A	118	1380	3	Light Fraction	2	3	חיטה/שעורה	Hordeum/Triticum	גרגיר	grain	דגניים	Gramineae	3	3	ספירה לפי MNI
NZN-55	Nitzana	Tepper and Bar-Oz		2017-2020	A	118	1380	3	Light Fraction	2	4	גפן	Vitis vinifera	חרצן	pip	גפניים	Vitaceae	9	9
NZN-55	Nitzana	Tepper and Bar-Oz		2017-2020	A	118	1380	3	Light Fraction	2	5			פרקי גבעול	culm nodes	דגניים	Gramineae	12	12	error margin 2	כולל שורש
NZN-55	Nitzana	Tepper and Bar-Oz		2017-2020	A	118	1380	3	Light Fraction	2	6	משנצת קוצנית	Hedysarum spinosissimum	זרע	seed	פרפרניים	Fabaceae	1	1
NZN-55	Nitzana	Tepper and Bar-Oz		2017-2020	A	118	1380	3	Light Fraction	2	7	בקיה תרבותית	Vicia sativa	זרע	seed	פרפרניים	Fabaceae	1	1	יואל הגדיר
NZN-55	Nitzana	Tepper and Bar-Oz		2017-2020	A	118	1380	3	Light Fraction	2	8	בקיים	Vicieae	זרע	seed	פרפרניים	Fabaceae	1	1	לא להתעסק
NZN-55	Nitzana	Tepper and Bar-Oz		2017-2020	A	118	1380	3	Light Fraction	2	9	בלתי		זרע	seed	פרפרניים	Fabaceae	1	1	לא להתעסק
NZN-55	Nitzana	Tepper and Bar-Oz		2017-2020	A	118	1380	3	Light Fraction	2	10	בלתי		זרע	seed	פרפרניים	Fabaceae	1	1	כנראה בקיים
NZN-55	Nitzana	Tepper and Bar-Oz		2017-2020	A	118	1380	3	Light Fraction	2	11	בלתי		קליפות
NZN-55	Nitzana	Tepper and Bar-Oz		2017-2020	A	118	1380	3	Light Fraction	2	12	יבלית מצויה?	Cynodon dactylon?	גרגיר	grain	דגניים	Gramineae	1	1	קטן
NZN-55	Nitzana	Tepper and Bar-Oz		2017-2020	A	118	1380	3	Light Fraction	2	13	בלתי-שונות
NZN-55	Nitzana	Tepper and Bar-Oz		2017-2020	A	118	1380	3	Light Fraction	2	14	גללים
NZN-56	Nitzana	Tepper and Bar-Oz		2017-2020	A	118	1380	3	Heavy Residue	2	1	חיטה/שעורה	Hordeum/Triticum	שברי גרגיר	grain fragment	דגניים	Gramineae
NZN-56	Nitzana	Tepper and Bar-Oz		2017-2020	A	118	1380	3	Heavy Residue	2	2	תמר?		שברי זרע	seed fragments
NZN-56	Nitzana	Tepper and Bar-Oz		2017-2020	A	118	1380	3	Heavy Residue	2	3	בלתי-שונות
NZN-56	Nitzana	Tepper and Bar-Oz		2017-2020	A	118	1380	3	Heavy Residue	2	4	גללים
NZN-57	Nitzana	Tepper and Bar-Oz		2017-2020	A	121	1407-1	3	Light Fraction	2	1	שעורה	Hordeum	שברי גרגיר	grain fragment	דגניים	Gramineae	1	1
NZN-57	Nitzana	Tepper and Bar-Oz		2017-2020	A	121	1407-1	3	Light Fraction	2	2	חיטה	Triticum	גרגיר	grain	דגניים	Gramineae	1	1
NZN-57	Nitzana	Tepper and Bar-Oz		2017-2020	A	121	1407-1	3	Light Fraction	2	3	חיטה/שעורה	Hordeum/Triticum	שברי גרגיר	grain fragment	דגניים	Gramineae	1	1	MNI
NZN-57	Nitzana	Tepper and Bar-Oz		2017-2020	A	121	1407-1	3	Light Fraction	2	4	גפן	Vitis vinifera	עוקץ וזג	grapeskin and pedicel	גפניים	Vitaceae	3	1+2	עקץ אחד
NZN-57	Nitzana	Tepper and Bar-Oz		2017-2020	A	121	1407-1	3	Light Fraction	2	5			פרקי גבעול	culm nodes	דגניים	Gramineae	11	11
NZN-57	Nitzana	Tepper and Bar-Oz		2017-2020	A	121	1407-1	3	Light Fraction	2	6			שורשים?	רםםאד?	דגניים	Gramineae	3	3
NZN-57	Nitzana	Tepper and Bar-Oz		2017-2020	A	121	1407-1	3	Light Fraction	2	7	בקיים	Vicieae	פסיג	cotyledon	פרפרניים	Fabaceae	2	2	3 פסיגים
NZN-57	Nitzana	Tepper and Bar-Oz		2017-2020	A	121	1407-1	3	Light Fraction	2	8	מתנן שעיר	Thymelaea hirsuta	ענף עם עלים	branch with leaves	מתנניים	Thymelaceae
NZN-57	Nitzana	Tepper and Bar-Oz		2017-2020	A	121	1407-1	3	Light Fraction	2	9	בלתי
NZN-57	Nitzana	Tepper and Bar-Oz		2017-2020	A	121	1407-1	3	Light Fraction	2	10	תמר??		קליפה
NZN-57	Nitzana	Tepper and Bar-Oz		2017-2020	A	121	1407-1	3	Light Fraction	2	11	בלתי-שונות
NZN-57	Nitzana	Tepper and Bar-Oz		2017-2020	A	121	1407-1	3	Light Fraction	2	12	גללים
NZN-58	Nitzana	Tepper and Bar-Oz		2017-2020	A	121	1407-1	3	Heavy Residue	2	1	שעורה	Hordeum	גרגיר	grain	דגניים	Gramineae	1	1
NZN-58	Nitzana	Tepper and Bar-Oz		2017-2020	A	121	1407-1	3	Heavy Residue	2	2	גפן	Vitis vinifera	זג	grapeskin	גפניים	Vitaceae
NZN-58	Nitzana	Tepper and Bar-Oz		2017-2020	A	121	1407-1	3	Heavy Residue	2	3				rachis base??	דגניים	Gramineae
NZN-58	Nitzana	Tepper and Bar-Oz		2017-2020	A	121	1407-1	3	Heavy Residue	2	4	גללים								2 טיפוסים
NZN-59	Nitzana	Tepper and Bar-Oz		2017-2020	A	121	1437-2	3	Light Fraction	2	1	שעורה	Hordeum	שברי גרגיר	grain fragment	דגניים	Gramineae	8	8	MNI=11
NZN-59	Nitzana	Tepper and Bar-Oz		2017-2020	A	121	1437-2	3	Light Fraction	2	2	גפן	Vitis vinifera	עוקץ	pedicel	גפניים	Vitaceae	1	1	יש עוד עוקץ אך לא ברור זהותו
NZN-59	Nitzana	Tepper and Bar-Oz		2017-2020	A	121	1437-2	3	Light Fraction	2	3			חלקי שדרה	rachis fragments	דגניים	Gramineae	1	1
NZN-59	Nitzana	Tepper and Bar-Oz		2017-2020	A	121	1437-2	3	Light Fraction	2	4			פרקי גבעול	culm nodes	דגניים	Gramineae	6	6
NZN-59	Nitzana	Tepper and Bar-Oz		2017-2020	A	121	1437-2	3	Light Fraction	2	5	בקיים	Vicieae	זרע	seed	פרפרניים	Fabaceae	1	1
NZN-59	Nitzana	Tepper and Bar-Oz		2017-2020	A	121	1437-2	3	Light Fraction	2	6	זית	Olea europaea	שבר	fragment	זיתיים	Oleaceae	1	1
NZN-59	Nitzana	Tepper and Bar-Oz		2017-2020	A	121	1437-2	3	Light Fraction	2	7	חרוב מצוי	Ceratonia siliqua	זרע	seed	כליליים	Caesalpiniaceae	1	1
NZN-59	Nitzana	Tepper and Bar-Oz		2017-2020	A	121	1437-2	3	Light Fraction	2	8	תמר??		קליפה
NZN-59	Nitzana	Tepper and Bar-Oz		2017-2020	A	121	1437-2	3	Light Fraction	2	9	בלתי-שונות
NZN-59	Nitzana	Tepper and Bar-Oz		2017-2020	A	121	1437-2	3	Light Fraction	2	10	גללים
NZN-60	Nitzana	Tepper and Bar-Oz		2017-2020	A	121	1437-2	3	Heavy Residue	2	1	חיטה/שעורה	Hordeum/Triticum	שברי גרגיר	grain fragment	דגניים	Gramineae	1	1
NZN-60	Nitzana	Tepper and Bar-Oz		2017-2020	A	121	1437-2	3	Heavy Residue	2	2	בלתי-שונות
NZN-60	Nitzana	Tepper and Bar-Oz		2017-2020	A	121	1437-2	3	Heavy Residue	2	3	גללים
NZN-61	Nitzana	Tepper and Bar-Oz		2017-2020	A	122	1411-2	3	Light Fraction	2	1	שעורה	Hordeum	גרגיר	grain	דגניים	Gramineae	4	4
NZN-61	Nitzana	Tepper and Bar-Oz		2017-2020	A	122	1411-2	3	Light Fraction	2	2			פרקי גבעול	culm nodes	דגניים	Gramineae	2	2	כולל שורש ואחד מתלבט
NZN-61	Nitzana	Tepper and Bar-Oz		2017-2020	A	122	1411-2	3	Light Fraction	2	3	בקיית הכרשינה	Vicia ervilia	זרע	seed	פרפרניים	Fabaceae	1	1	לוודא
NZN-61	Nitzana	Tepper and Bar-Oz		2017-2020	A	122	1411-2	3	Light Fraction	2	4	בלתי
NZN-61	Nitzana	Tepper and Bar-Oz		2017-2020	A	122	1411-2	3	Light Fraction	2	5	תמר??		קליפה
NZN-61	Nitzana	Tepper and Bar-Oz		2017-2020	A	122	1411-2	3	Light Fraction	2	6	בלתי		ציפה?
NZN-61	Nitzana	Tepper and Bar-Oz		2017-2020	A	122	1411-2	3	Light Fraction	2	7	גללים
NZN-62	Nitzana	Tepper and Bar-Oz		2017-2020	A	122	1411-2	3	Heavy Residue	2	1	חיטה/שעורה	Hordeum/Triticum	שברי גרגיר	grain fragment	דגניים	Gramineae	2	2
NZN-62	Nitzana	Tepper and Bar-Oz		2017-2020	A	122	1411-2	3	Heavy Residue	2	2	בלתי		חרק רצנטי?
NZN-62	Nitzana	Tepper and Bar-Oz		2017-2020	A	122	1411-2	3	Heavy Residue	2	3	גללים
NZN-63	Nitzana	Tepper and Bar-Oz		2017-2020	A	123	1415-2	3	Light Fraction	2	1	שעורה	Hordeum	שברי גרגיר	grain fragment	דגניים	Gramineae	2	2	MNI=3
NZN-63	Nitzana	Tepper and Bar-Oz		2017-2020	A	123	1415-2	3	Light Fraction	2	2	חיטה	Triticum	גרגיר	grain	דגניים	Gramineae	1	1
NZN-63	Nitzana	Tepper and Bar-Oz		2017-2020	A	123	1415-2	3	Light Fraction	2	3			פרקי גבעול	culm nodes	דגניים	Gramineae	3	3
NZN-63	Nitzana	Tepper and Bar-Oz		2017-2020	A	123	1415-2	3	Light Fraction	2	4	טופח	Lathyrus sect. cicercula	זרע	seed	פרפרניים	Fabaceae	1	1
NZN-63	Nitzana	Tepper and Bar-Oz		2017-2020	A	123	1415-2	3	Light Fraction	2	5	אמיך קוצני	Emex spinosa	פרי	fruit	ארכוביתיים	Polygonaceae
NZN-63	Nitzana	Tepper and Bar-Oz		2017-2020	A	123	1415-2	3	Light Fraction	2	6	גללים
NZN-63	Nitzana	Tepper and Bar-Oz		2017-2020	A	123	1415-2	3	Light Fraction	1	7	cf. שעורה דו-טורית	cf. Hordeum vulgare subsp. spontaneum/distichum	פרק ציר שיבולת	rachis fragments	דגניים	Gramineae	5	5
NZN-63	Nitzana	Tepper and Bar-Oz		2017-2020	A	123	1415-2	3	Light Fraction	1	8	cf. חיטה טטרפלוידית	cf. Truticum turgidum s.l.	פרק ציר שיבולת	rachis fragments	דגניים	Gramineae	1	1
NZN-63	Nitzana	Tepper and Bar-Oz		2017-2020	A	123	1415-2	3	Light Fraction	1	9	דגני		פרק ציר שיבולת	rachis fragments	דגניים	Gramineae	3	3
NZN-63	Nitzana	Tepper and Bar-Oz		2017-2020	A	123	1415-2	3	Light Fraction	1	10			פרקי גבעול	culm nodes	דגניים	Gramineae	1	1
NZN-63	Nitzana	Tepper and Bar-Oz		2017-2020	A	123	1415-2	3	Light Fraction	1	11	פיקוס התאנה	Ficus carica	אגוזית	nutlet			1	1
NZN-63	Nitzana	Tepper and Bar-Oz		2017-2020	A	123	1415-2	3	Light Fraction	1	12	מתנן שעיר		עלים				2	2
NZN-63	Nitzana	Tepper and Bar-Oz		2017-2020	A	123	1415-2	3	Light Fraction	1	13	ארנבית שרועה?						1	1
NZN-63	Nitzana	Tepper and Bar-Oz		2017-2020	A	123	1415-2	3	Light Fraction	1	14	גלעינית זעירת פרחים?						1	1
NZN-63	Nitzana	Tepper and Bar-Oz		2017-2020	A	123	1415-2	3	Light Fraction	1	15	דמומית?						1	1
NZN-63	Nitzana	Tepper and Bar-Oz		2017-2020	A	123	1415-2	3	Light Fraction	1	16	דגני?						1	1
NZN-63	Nitzana	Tepper and Bar-Oz		2017-2020	A	123	1415-2	3	Light Fraction	1	17	כף-אווז רצנטי?						1	1
NZN-63	Nitzana	Tepper and Bar-Oz		2017-2020	A	123	1415-2	3	Light Fraction	1	18	מררית? רצנטי?						1	1
NZN-63	Nitzana	Tepper and Bar-Oz		2017-2020	A	123	1415-2	3	Light Fraction	1	19	בלתי-שונות
NZN-63	Nitzana	Tepper and Bar-Oz		2017-2020	A	123	1415-2	3	Light Fraction	1	20	גללים
NZN-63	Nitzana	Tepper and Bar-Oz		2017-2020	A	123	1415-2	3	Light Fraction	1	21	בקיים	Vicieae	זרע	seed	פרפרניים	Fabaceae	1	1
NZN-64	Nitzana	Tepper and Bar-Oz		2017-2020	A	123	1415-2	3	Heavy Residue	2	1	שעורה	Hordeum	גרגיר	grain fragment	דגניים	Gramineae	1	1
NZN-64	Nitzana	Tepper and Bar-Oz		2017-2020	A	123	1415-2	3	Heavy Residue	2	2	חיטה/שעורה	Hordeum/Triticum	שברי גרגיר	grain fragment	דגניים	Gramineae			שברים שלא סופרים
NZN-64	Nitzana	Tepper and Bar-Oz		2017-2020	A	123	1415-2	3	Heavy Residue	2	3			פרקי גבעול	culm nodes	דגניים	Gramineae	1	1
NZN-64	Nitzana	Tepper and Bar-Oz		2017-2020	A	123	1415-2	3	Heavy Residue	2	4	בלתי
NZN-65	Nitzana	Tepper and Bar-Oz		2017-2020	A	123	1423-2	3	Light Fraction	2	1	מתנן שעיר	Thymelaea hirsuta	עלה	leaf	מתנניים	Thymelaceae	1	1
NZN-65	Nitzana	Tepper and Bar-Oz		2017-2020	A	123	1423-2	3	Light Fraction	2	2	בר-עכנאי שיחני						1	1	מתנן או עכנאי?
NZN-65	Nitzana	Tepper and Bar-Oz		2017-2020	A	123	1423-2	3	Light Fraction	2	3	בלתי
NZN-65	Nitzana	Tepper and Bar-Oz		2017-2020	A	123	1423-2	3	Light Fraction	2	4	בלתי-שונות
NZN-65	Nitzana	Tepper and Bar-Oz		2017-2020	A	123	1423-2	3	Light Fraction	2	5	תמר??		קליפה
NZN-65	Nitzana	Tepper and Bar-Oz		2017-2020	A	123	1423-2	3	Light Fraction	2	6	גללים?								לא מפוחם
NZN-65	Nitzana	Tepper and Bar-Oz		2017-2020	A	123	1423-2	3	Light Fraction	1	7	גפן	Vitis vinifera	אנדוספרם	endosperm	גפניים	Vitaceae	2	2
NZN-65	Nitzana	Tepper and Bar-Oz		2017-2020	A	123	1423-2	3	Light Fraction	1	8	גפן	Vitis vinifera	עוקץ	pedicel	גפניים	Vitaceae	1	1
NZN-65	Nitzana	Tepper and Bar-Oz		2017-2020	A	123	1423-2	3	Light Fraction	1	9	דגני		פרק ציר שיבולת
NZN-65	Nitzana	Tepper and Bar-Oz		2017-2020	A	123	1423-2	3	Light Fraction	1	10	מתנן שעיר		עלה				5	5	אחד כמו ניצן
NZN-65	Nitzana	Tepper and Bar-Oz		2017-2020	A	123	1423-2	3	Light Fraction	1	11	פיקוס התאנה	Ficus carica	אגוזית	nutlet	תותיים	Moraceae	1	1
NZN-65	Nitzana	Tepper and Bar-Oz		2017-2020	A	123	1423-2	3	Light Fraction	1	12	דגני			culm node			2	2
NZN-65	Nitzana	Tepper and Bar-Oz		2017-2020	A	123	1423-2	3	Light Fraction	1	13	ארנבית שרועה?						1	1
NZN-65	Nitzana	Tepper and Bar-Oz		2017-2020	A	123	1423-2	3	Light Fraction	1	14	גלעינית זעירת פרחים?						1	1
NZN-65	Nitzana	Tepper and Bar-Oz		2017-2020	A	123	1423-2	3	Light Fraction	1	15	בר-עכנאי?						4	4
NZN-65	Nitzana	Tepper and Bar-Oz		2017-2020	A	123	1423-2	3	Light Fraction	1	16	חלמית		זרע				1	1
NZN-65	Nitzana	Tepper and Bar-Oz		2017-2020	A	123	1423-2	3	Light Fraction	1	17	אספסת?						1	1
NZN-65	Nitzana	Tepper and Bar-Oz		2017-2020	A	123	1423-2	3	Light Fraction	1	18	ששן מאפיר?						1	1
NZN-65	Nitzana	Tepper and Bar-Oz		2017-2020	A	123	1423-2	3	Light Fraction	1	19	בלתי						1	1
NZN-65	Nitzana	Tepper and Bar-Oz		2017-2020	A	123	1423-2	3	Light Fraction	1	20	שבר?						3	3
NZN-65	Nitzana	Tepper and Bar-Oz		2017-2020	A	123	1423-2	3	Light Fraction	1	21	בלתי						1	1	אנדוספרם של משהו? יואל ראה והחזיר
NZN-65	Nitzana	Tepper and Bar-Oz		2017-2020	A	123	1423-2	3	Light Fraction	1	22	שלוחית שעירה/קרחת	Andrachne telephioides/aspera					1	1
NZN-65	Nitzana	Tepper and Bar-Oz		2017-2020	A	123	1423-2	3	Light Fraction	1	23	בלתי ליואל						1	1
NZN-65	Nitzana	Tepper and Bar-Oz		2017-2020	A	123	1423-2	3	Light Fraction	1	24	שונות ליואל
NZN-65	Nitzana	Tepper and Bar-Oz		2017-2020	A	123	1423-2	3	Light Fraction	1	25	דגני		שברי מלען
NZN-65	Nitzana	Tepper and Bar-Oz		2017-2020	A	123	1423-2	3	Light Fraction	1	26	בלתי-שונות
NZN-65	Nitzana	Tepper and Bar-Oz		2017-2020	A	123	1423-2	3	Light Fraction	1	27	גללים
NZN-65	Nitzana	Tepper and Bar-Oz		2017-2020	A	123	1423-2	3	Light Fraction	1	28	עצם
NZN-66	Nitzana	Tepper and Bar-Oz		2017-2020	A	123	1423-2	3	Heavy Residue	2	1	גללים								אולי עוד משהו
NZN-67	Nitzana	Tepper and Bar-Oz		2017-2020	A	125	1446	3	Light Fraction	2	1	שעורה	Hordeum	גרגיר	grain	דגניים	Gramineae	109	109	MNI=124	אם סופרים גדולים מחצי, 109, אם סופרים קצוות כחצי גרגיר, 120, אם מתחשבים בשאר השברים, 124
NZN-67	Nitzana	Tepper and Bar-Oz		2017-2020	A	125	1446	3	Light Fraction	2	2	חיטה	Triticum	גרגיר	grain	דגניים	Gramineae	1	1
NZN-67	Nitzana	Tepper and Bar-Oz		2017-2020	A	125	1446	3	Light Fraction	2	3	חיטה/שעורה	Hordeum/Triticum	גרגיר	grain	דגניים	Gramineae	8	8		אחד נראה חיטה
NZN-67	Nitzana	Tepper and Bar-Oz		2017-2020	A	125	1446	3	Light Fraction	2	4	גפן	Vitis vinifera	חרצן	pip	גפניים	Vitaceae	2	2
NZN-67	Nitzana	Tepper and Bar-Oz		2017-2020	A	125	1446	3	Light Fraction	2	5			חלקי שדרה	rachis fragments	דגניים	Gramineae	3	3
NZN-67	Nitzana	Tepper and Bar-Oz		2017-2020	A	125	1446	3	Light Fraction	2	6			פרקי גבעול	culm nodes	דגניים	Gramineae	12	12
NZN-67	Nitzana	Tepper and Bar-Oz		2017-2020	A	125	1446	3	Light Fraction	2	7	cf. עוקצר מצוי	Brachypodium distachyon	גרגיר	grain	דגניים	Gramineae	2	2	השווה לעיל
NZN-67	Nitzana	Tepper and Bar-Oz		2017-2020	A	125	1446	3	Light Fraction	2	8	עדשה	Lens culinaris	פסיג וזרע	cotyledon and seed	פרפרניים	Fabaceae	2	2
NZN-67	Nitzana	Tepper and Bar-Oz		2017-2020	A	125	1446	3	Light Fraction	2	9	בקיים	Vicieae	זרע	seed	פרפרניים	Fabaceae	1	1		סיכוי טוב לטוב מצוי
NZN-67	Nitzana	Tepper and Bar-Oz		2017-2020	A	125	1446	3	Light Fraction	2	10	בקיית הכרשינה	Vicia ervilia	זרע	seed	פרפרניים	Fabaceae	1	1	כמו כרשינה קטנה	אכן! מתאים בול בצורה וניתן להבחין בשד של טבורית
NZN-67	Nitzana	Tepper and Bar-Oz		2017-2020	A	125	1446	3	Light Fraction	2	11	בקיים	Vicieae	זרע ושבר	seed and fragment	פרפרניים	Fabaceae	2	2
NZN-67	Nitzana	Tepper and Bar-Oz		2017-2020	A	125	1446	3	Light Fraction	2	12	זית	Olea europaea	שבר	fragment	זיתיים	Oleaceae	1	1
NZN-67	Nitzana	Tepper and Bar-Oz		2017-2020	A	125	1446	3	Light Fraction	2	13	תמר	Phoenix dactylifera	שבר גלעין	stone fragment	דקליים	Palmae
NZN-67	Nitzana	Tepper and Bar-Oz		2017-2020	A	125	1446	3	Light Fraction	2	14	רימון	Punica granatum	זרע	seed		Lythraceae	3	3	לאישור של יואל
NZN-67	Nitzana	Tepper and Bar-Oz		2017-2020	A	125	1446	3	Light Fraction	2	15	אמיך קוצני	Emex spinosa	פרי	fruit	ארכוביתיים	Polygonaceae	1	1
NZN-67	Nitzana	Tepper and Bar-Oz		2017-2020	A	125	1446	3	Light Fraction	2	16	סלק?
NZN-67	Nitzana	Tepper and Bar-Oz		2017-2020	A	125	1446	3	Light Fraction	2	17	Salsoleae	Salsoleae	פרק?				1	1
NZN-67	Nitzana	Tepper and Bar-Oz		2017-2020	A	125	1446	3	Light Fraction	2	18	שיטה	Acacia sp.	זרע	seed	שיטיים		1	1
NZN-67	Nitzana	Tepper and Bar-Oz		2017-2020	A	125	1446	3	Light Fraction	2	19	cf. עדשה	cf. Lens culinaris	זרע	seed	פרפרניים	Fabaceae	1	1		יואל: בטוח בקיים, פסיגים שטוחים נדמה שיש יציאה של שורשון. אולם, קשה להכריע
NZN-67	Nitzana	Tepper and Bar-Oz		2017-2020	A	125	1446	3	Light Fraction	2	20	דלועי?						1	1		לחבר בהמשך
NZN-67	Nitzana	Tepper and Bar-Oz		2017-2020	A	125	1446	3	Light Fraction	2	21	שעורה/זון?	cf. Hordeum vulgare/ Lolium temulentum	גרגיר	grain	דגניים	Gramineae	1	1
NZN-67	Nitzana	Tepper and Bar-Oz		2017-2020	A	125	1446	3	Light Fraction	2	22	בלתי-שונות
NZN-67	Nitzana	Tepper and Bar-Oz		2017-2020	A	125	1446	3	Light Fraction	2	23	גללים
NZN-67	Nitzana	Tepper and Bar-Oz		2017-2020	A	125	1446	3	Light Fraction	2	24	חרק		רגל?
NZN-67	Nitzana	Tepper and Bar-Oz		2017-2020	A	125	1446	3	Light Fraction	1	25	גפן	Vitis vinifera	חרצן	pip	גפניים	Vitaceae	1	1	נספר לפי עוקץ חרצן
NZN-67	Nitzana	Tepper and Bar-Oz		2017-2020	A	125	1446	3	Light Fraction	1	26	גפן	Vitis vinifera	עוקץ	pedicel	גפניים	Vitaceae	1	1
NZN-67	Nitzana	Tepper and Bar-Oz		2017-2020	A	125	1446	3	Light Fraction	1	27	שעורה שש-טורית	Hordeum vulgare subsp. hexastichum	פרק ציר שיבולת	rachis fragments	דגניים	Gramineae	39	39
NZN-67	Nitzana	Tepper and Bar-Oz		2017-2020	A	125	1446	3	Light Fraction	1	28	שעורה דו-טורית/התבור	Hordeum vulgare subsp. disticum/spontaneum	פרק ציר שיבולת	rachis fragments	דגניים	Gramineae	17	17
NZN-67	Nitzana	Tepper and Bar-Oz		2017-2020	A	125	1446	3	Light Fraction	1	29	שעורה	Hordeum vulgare	פרק ציר שיבולת	rachis fragments	דגניים	Gramineae	27	27
NZN-67	Nitzana	Tepper and Bar-Oz		2017-2020	A	125	1446	3	Light Fraction	1	30	שעורה	Hordeum vulgare	בסיס ציר שיבולת	basal rachis segment	דגניים	Gramineae	4	4
NZN-67	Nitzana	Tepper and Bar-Oz		2017-2020	A	125	1446	3	Light Fraction	1	31	שעורה?	cf. Hordeum vulgare	צווארון	culm collar			1	1
NZN-67	Nitzana	Tepper and Bar-Oz		2017-2020	A	125	1446	3	Light Fraction	1	32	חיטה טטרפלוידית	Triticum turgidum s.l.	פרק ציר שיבולת	rachis fragments	דגניים	Gramineae	9	9
NZN-67	Nitzana	Tepper and Bar-Oz		2017-2020	A	125	1446	3	Light Fraction	1	33	חיטה ??	Triticum??	צווארון	culm collar	דגניים	Gramineae	2	2
NZN-67	Nitzana	Tepper and Bar-Oz		2017-2020	A	125	1446	3	Light Fraction	1	34	חיטה/שעורה	Hordeum/Triticum	בסיס ציר שיבולת	rachis fragments	דגניים	Gramineae	22	22
NZN-67	Nitzana	Tepper and Bar-Oz		2017-2020	A	125	1446	3	Light Fraction	1	35	חיטה/שעורה	Hordeum/Triticum	בסיס ציר שיבולת	basal rachis segment	דגניים	Gramineae	1	1
NZN-67	Nitzana	Tepper and Bar-Oz		2017-2020	A	125	1446	3	Light Fraction	1	36	שעורה??	Hordeum sp.??	פרק ציר שיבולת	rachis fragments	דגניים	Gramineae	1	1	או דגני אחר? להמשך
NZN-67	Nitzana	Tepper and Bar-Oz		2017-2020	A	125	1446	3	Light Fraction	1	37	חיטה ??	Triticum??	פרק ציר שיבולת	rachis fragments	דגניים	Gramineae	2	2	או דגני אחר? להמשך
NZN-67	Nitzana	Tepper and Bar-Oz		2017-2020	A	125	1446	3	Light Fraction	1	38	שיבולת שועל	Avena sp.			דגניים	Gramineae	1	1
NZN-67	Nitzana	Tepper and Bar-Oz		2017-2020	A	125	1446	3	Light Fraction	1	39			שרשי דגן	roots	דגניים	Gramineae	30	30
NZN-67	Nitzana	Tepper and Bar-Oz		2017-2020	A	125	1446	3	Light Fraction	1	40			פרקי גבעול	culm nodes	דגניים	Gramineae	5	5
NZN-67	Nitzana	Tepper and Bar-Oz		2017-2020	A	125	1446	3	Light Fraction	1	41	שעורה	Hordeum sp.	גרגיר	grain	דגניים	Gramineae	5	5
NZN-67	Nitzana	Tepper and Bar-Oz		2017-2020	A	125	1446	3	Light Fraction	1	42	שעורה	Hordeum sp.	גרגיר	grain	דגניים	Gramineae	1	1
NZN-67	Nitzana	Tepper and Bar-Oz		2017-2020	A	125	1446	3	Light Fraction	1	43	cf. שעורה	cf. Hordeum sp.	גרגיר	grain	דגניים	Gramineae	5	5	cf. NZN67-41
NZN-67	Nitzana	Tepper and Bar-Oz		2017-2020	A	125	1446	3	Light Fraction	1	44	זון אשון/רבשנתי?		גרגיר	grain	דגניים	Gramineae	10	10
NZN-67	Nitzana	Tepper and Bar-Oz		2017-2020	A	125	1446	3	Light Fraction	1	45	ברומית/עוקצר?		גרגיר	grain	דגניים	Gramineae	6	6
NZN-67	Nitzana	Tepper and Bar-Oz		2017-2020	A	125	1446	3	Light Fraction	1	46	חפורית קטנה?		גרגיר	grain	דגניים	Gramineae	1	1
NZN-67	Nitzana	Tepper and Bar-Oz		2017-2020	A	125	1446	3	Light Fraction	1	47	דגני-שונות		גרגיר	grain	דגניים	Gramineae	6	6
NZN-67	Nitzana	Tepper and Bar-Oz		2017-2020	A	125	1446	3	Light Fraction	1	48			שברי מלען וגלומה	awn and glume fragments	דגניים	Gramineae
NZN-67	Nitzana	Tepper and Bar-Oz		2017-2020	A	125	1446	3	Light Fraction	1	49	בקיים?		פסיג	cotyledon	פרפרניים	Fabaceae	1	1
NZN-67	Nitzana	Tepper and Bar-Oz		2017-2020	A	125	1446	3	Light Fraction	1	50	אספסת?		זרע	seed	פרפרניים	Fabaceae	2	2
NZN-67	Nitzana	Tepper and Bar-Oz		2017-2020	A	125	1446	3	Light Fraction	1	51	גרגרנית ערבית	Trigonella arabica	זרע	seed	פרפרניים	Fabaceae	9	9
NZN-67	Nitzana	Tepper and Bar-Oz		2017-2020	A	125	1446	3	Light Fraction	1	52	גרגרנית/תלתן						14	14
NZN-67	Nitzana	Tepper and Bar-Oz		2017-2020	A	125	1446	3	Light Fraction	1	53	תאנה						1	1
NZN-67	Nitzana	Tepper and Bar-Oz		2017-2020	A	125	1446	3	Light Fraction	1	54	מתנן שעיר	Thymelaea hirsuta	עלה	leaf	מתנניים	Thymelaceae	27	27	מתוכם 5 מפוחמים
NZN-67	Nitzana	Tepper and Bar-Oz		2017-2020	A	125	1446	3	Light Fraction	1	55	מתנן שעיר	Thymelaea hirsuta	ניצן עם עלים	bud with leaves	מתנניים	Thymelaceae	2	2
NZN-67	Nitzana	Tepper and Bar-Oz		2017-2020	A	125	1446	3	Light Fraction	1	56	ארנבית שרועה	Arnebia decumbrens	זרע	seed	זיפניים	Boraginaceae	7	7
NZN-67	Nitzana	Tepper and Bar-Oz		2017-2020	A	125	1446	3	Light Fraction	1	57	בר-עכנאי שיחני	Echiochilon fruticosum	זרע	seed	זיפניים	Boraginaceae	3	3
NZN-67	Nitzana	Tepper and Bar-Oz		2017-2020	A	125	1446	3	Light Fraction	1	58	גלעינון החוף	Moltkiopsis ciliata	זרע	seed	זיפניים	Boraginaceae	1	1
NZN-67	Nitzana	Tepper and Bar-Oz		2017-2020	A	125	1446	3	Light Fraction	1	59	חלמית קטנת-פרחים/חדת-אונות	Malva parviflora/oxyloba	זרע	seed	חלמיתיים	Malvaceae	4	4
NZN-67	Nitzana	Tepper and Bar-Oz		2017-2020	A	125	1446	3	Light Fraction	1	60	שבר לבן	Peganum harmala	זרע	seed	זוגניים	Zygophyllaceae	2	2
NZN-67	Nitzana	Tepper and Bar-Oz		2017-2020	A	125	1446	3	Light Fraction	1	61	עשנן cf. קטן	Fumaria cf. parviflora	אגוזית	nutlet	עשנניים	Fumariaceae	1	1
NZN-67	Nitzana	Tepper and Bar-Oz		2017-2020	A	125	1446	3	Light Fraction	1	62	אמיך קוצני	Emex spinosa	שבר קליפת פרי		ארכוביתיים	Polygonaceae	1	1
NZN-67	Nitzana	Tepper and Bar-Oz		2017-2020	A	125	1446	3	Light Fraction	1	63	אשל הפרקים	Tamarix aphylla	פרקים	scales	אשליים	Tamaricaceae	15	15
NZN-67	Nitzana	Tepper and Bar-Oz		2017-2020	A	125	1446	3	Light Fraction	1	64	אשליל שעיר?	Reaumuria sp.	ניצן של ענף	bud	אשליים	Tamaricaceae	1	1
NZN-67	Nitzana	Tepper and Bar-Oz		2017-2020	A	125	1446	3	Light Fraction	1	65	בן-שלח מנוצה						1	1
NZN-67	Nitzana	Tepper and Bar-Oz		2017-2020	A	125	1446	3	Light Fraction	1	66	נונאה כרסנית/נאה	Nonea echioides/melanocarpa			זיפניים	Boraginaceae	1	1
NZN-67	Nitzana	Tepper and Bar-Oz		2017-2020	A	125	1446	3	Light Fraction	1	67	לחך						1	1
NZN-67	Nitzana	Tepper and Bar-Oz		2017-2020	A	125	1446	3	Light Fraction	1	68	ציפרני החתול	Calendula sp.	זרע		מורכבים	Asteraceae	2	2
NZN-67	Nitzana	Tepper and Bar-Oz		2017-2020	A	125	1446	3	Light Fraction	1	69	מצעית מורכבים		מצעית		מורכבים		1	1
NZN-67	Nitzana	Tepper and Bar-Oz		2017-2020	A	125	1446	3	Light Fraction	1	70	רשתון השדות	Neslia apiculata	אגוזית		מצליבים		1	1
NZN-67	Nitzana	Tepper and Bar-Oz		2017-2020	A	125	1446	3	Light Fraction	1	71	פרסת הסוס	Hippocrepis unisiliquosa	זרע	seed	פרפרניים	Fabaceae	1	1
NZN-67	Nitzana	Tepper and Bar-Oz		2017-2020	A	125	1446	3	Light Fraction	1	72	כנפן?						1	1	לא מפוחם
NZN-67	Nitzana	Tepper and Bar-Oz		2017-2020	A	125	1446	3	Light Fraction	1	73	בלתי						1	1	להגדיר/לחבר בהמשך
NZN-67	Nitzana	Tepper and Bar-Oz		2017-2020	A	125	1446	3	Light Fraction	1	74	Salsoleae?		עלה קשקשני				1	1
NZN-67	Nitzana	Tepper and Bar-Oz		2017-2020	A	125	1446	3	Light Fraction	1	75	אחיאירוס? שושניים?						4	4	להמשך
NZN-67	Nitzana	Tepper and Bar-Oz		2017-2020	A	125	1446	3	Light Fraction	1	76	להגדיר בהמשך		הלקט				1	1	מעניין מאד
NZN-67	Nitzana	Tepper and Bar-Oz		2017-2020	A	125	1446	3	Light Fraction	1	77	בלתי						4	4	תאנה?? יואל ראה
NZN-67	Nitzana	Tepper and Bar-Oz		2017-2020	A	125	1446	3	Light Fraction	1	78	זרע בגלל						4	4
NZN-67	Nitzana	Tepper and Bar-Oz		2017-2020	A	125	1446	3	Light Fraction	1	79	בלתי-שונות								להמשך. אבל יואל ראה
NZN-67	Nitzana	Tepper and Bar-Oz		2017-2020	A	125	1446	3	Light Fraction	1	80	בלתי-שונות
NZN-67	Nitzana	Tepper and Bar-Oz		2017-2020	A	125	1446	3	Light Fraction	1	81	גלל
NZN-67	Nitzana	Tepper and Bar-Oz		2017-2020	A	125	1446	3	Light Fraction	1	82	עצם								כולל קשקשי דג
NZN-67	Nitzana	Tepper and Bar-Oz		2017-2020	A	125	1446	3	Light Fraction	1	83
NZN-68	Nitzana	Tepper and Bar-Oz		2017-2020	A	125	1446	3	Heavy Residue	2	1	שעורה	Hordeum	גרגיר	grain	דגניים	Gramineae	44	44	ועוד 10 חצאים	MNI=49
NZN-68	Nitzana	Tepper and Bar-Oz		2017-2020	A	125	1446	3	Heavy Residue	2	2	חיטה	Triticum	גרגיר	grain	דגניים	Gramineae	1	1
NZN-68	Nitzana	Tepper and Bar-Oz		2017-2020	A	125	1446	3	Heavy Residue	2	3	חיטה/שעורה	Hordeum/Triticum	גרגיר	grain	דגניים	Gramineae	9	9	4נוטים לשעורה, 1לחיטה, 4שרופים מדיי
NZN-68	Nitzana	Tepper and Bar-Oz		2017-2020	A	125	1446	3	Heavy Residue	2	4	גפן	Vitis vinifera	חרצן	pip	גפניים	Vitaceae	1	1
NZN-68	Nitzana	Tepper and Bar-Oz		2017-2020	A	125	1446	3	Heavy Residue	2	5			חלקי שדרה	rachis fragments	דגניים	Gramineae	1	1
NZN-68	Nitzana	Tepper and Bar-Oz		2017-2020	A	125	1446	3	Heavy Residue	2	6	זית	Olea europaea	שבר	fragment	זיתיים	Oleaceae	1	1	שווה בדיקה
NZN-68	Nitzana	Tepper and Bar-Oz		2017-2020	A	125	1446	3	Heavy Residue	2	7	בקיים	Vicieae	פסיג	cotyledon	פרפרניים	Fabaceae	2	2	כנראה כרשינה
NZN-68	Nitzana	Tepper and Bar-Oz		2017-2020	A	125	1446	3	Heavy Residue	2	8	דבקה	Galium sp.	זרע	seed	פואתיים	Rubiaceae	1	1
NZN-68	Nitzana	Tepper and Bar-Oz		2017-2020	A	125	1446	3	Heavy Residue	2	9	דגני		גרגיר	grain	דגניים	Gramineae	1	1	לא נראה בר זיהוי
NZN-68	Nitzana	Tepper and Bar-Oz		2017-2020	A	125	1446	3	Heavy Residue	2	10	בלתי								פרקי אשל על מוץ?	יואל: אולי SEM
NZN-68	Nitzana	Tepper and Bar-Oz		2017-2020	A	125	1446	3	Heavy Residue	2	11	בלתי									יואל: לא לעכשיו ולא בטוח שיצא מזה משהו
NZN-68	Nitzana	Tepper and Bar-Oz		2017-2020	A	125	1446	3	Heavy Residue	2	12	בלתי
NZN-68	Nitzana	Tepper and Bar-Oz		2017-2020	A	125	1446	3	Heavy Residue	2	13	בלתי								ציפה?
NZN-68	Nitzana	Tepper and Bar-Oz		2017-2020	A	125	1446	3	Heavy Residue	2	14	גללים
NZN-68	Nitzana	Tepper and Bar-Oz		2017-2020	A	125	1446	3	Heavy Residue	2	15	חיטה/שעורה		שברי גרגיר	grain fragment	דגניים	Gramineae
NZN-68	Nitzana	Tepper and Bar-Oz		2017-2020	A	125	1446	3	Heavy Residue	2	16	בקיים	Vicieae	זרע	seed	פרפרניים	Fabaceae	1	1	נשבר לי אך עדיין יש טבורית
NZN-68	Nitzana	Tepper and Bar-Oz		2017-2020	A	125	1446	3	Heavy Residue	2	17	בקיים	Vicieae	פסיג	cotyledon	פרפרניים	Fabaceae	1	1
NZN-68	Nitzana	Tepper and Bar-Oz		2017-2020	A	125	1446	3	Heavy Residue	2	18	בקיים	Vicieae	זרע	seed	פרפרניים	Fabaceae	1	1	need V. monantha to dissect
NZN-68	Nitzana	Tepper and Bar-Oz		2017-2020	A	125	1446	3	Heavy Residue	2	19	בקיים	Vicieae	זרע	seed	פרפרניים	Fabaceae	1	1
NZN-68	Nitzana	Tepper and Bar-Oz		2017-2020	A	125	1446	3	Heavy Residue	2	20	בקיים	Vicieae	פסיג	cotyledon	פרפרניים	Fabaceae
NZN-68	Nitzana	Tepper and Bar-Oz		2017-2020	A	125	1446	3	Heavy Residue	2	21	בקיים	Vicieae	פסיג	cotyledon	פרפרניים	Fabaceae
NZN-69	Nitzana	Tepper and Bar-Oz		2017-2020	A	126	1517-1	3	Light Fraction	2	1	שעורה	Hordeum	גרגיר	grain	דגניים	Gramineae	16	16	MNI=17, with <half ends
NZN-69	Nitzana	Tepper and Bar-Oz		2017-2020	A	126	1517-1	3	Light Fraction	2	2	שעורה	Hordeum	גרגיר	grain	דגניים	Gramineae	2	2	משונים, השווה 68-3
NZN-69	Nitzana	Tepper and Bar-Oz		2017-2020	A	126	1517-1	3	Light Fraction	2	3	חיטה/שעורה	Hordeum/Triticum	גרגיר	grain	דגניים	Gramineae	2	2	ועוד שברים
NZN-69	Nitzana	Tepper and Bar-Oz		2017-2020	A	126	1517-1	3	Light Fraction	2	4	גפן	Vitis vinifera	חרצן	pip	גפניים	Vitaceae	1	1
NZN-69	Nitzana	Tepper and Bar-Oz		2017-2020	A	126	1517-1	3	Light Fraction	2	5	גפן	Vitis vinifera	עוקץ וזג	grapeskin and pedicel	גפניים	Vitaceae	1	1	מחובר, שווה מאד לצלם
NZN-69	Nitzana	Tepper and Bar-Oz		2017-2020	A	126	1517-1	3	Light Fraction	2	6			פרקי גבעול	culm nodes	דגניים	Gramineae	2	2	אחד שורש
NZN-69	Nitzana	Tepper and Bar-Oz		2017-2020	A	126	1517-1	3	Light Fraction	2	7	זמזומית??		זרע	seed			1	1
NZN-69	Nitzana	Tepper and Bar-Oz		2017-2020	A	126	1517-1	3	Light Fraction	2	8	מצעית מורכבים?		מצעית		מורכבים		1	1	לחבר בהמשך
NZN-69	Nitzana	Tepper and Bar-Oz		2017-2020	A	126	1517-1	3	Light Fraction	2	9	תמר??		קליפה
NZN-69	Nitzana	Tepper and Bar-Oz		2017-2020	A	126	1517-1	3	Light Fraction	2	10	בלתי-שונות
NZN-69	Nitzana	Tepper and Bar-Oz		2017-2020	A	126	1517-1	3	Light Fraction	2	11	גללים								שווה בדיקה
NZN-69	Nitzana	Tepper and Bar-Oz		2017-2020	A	126	1517-1	3	Light Fraction	1	12	גפן	Vitis vinifera	שבר אנדוספרם	endosperm fragment	גפניים	Vitaceae	1	1
NZN-69	Nitzana	Tepper and Bar-Oz		2017-2020	A	126	1517-1	3	Light Fraction	1	13	גפן	Vitis vinifera	עוקץ	pedicel	גפניים	Vitaceae	2	2	השני מצטרף
NZN-69	Nitzana	Tepper and Bar-Oz		2017-2020	A	126	1517-1	3	Light Fraction	1	14	שעורה שש-טורית	Hordeum vulgare subsp. hexastichum	פרק ציר שיבולת	rachis fragments	דגניים	Gramineae	11	11
NZN-69	Nitzana	Tepper and Bar-Oz		2017-2020	A	126	1517-1	3	Light Fraction	1	15	שעורה דו-טורית/התבור	Hordeum vulgare subsp. disticum/spontaneum	פרק ציר שיבולת	rachis fragments	דגניים	Gramineae	2	2
NZN-69	Nitzana	Tepper and Bar-Oz		2017-2020	A	126	1517-1	3	Light Fraction	1	16	שעורה	Hordeum vulgare	פרק ציר שיבולת	rachis fragments	דגניים	Gramineae	2	2
NZN-69	Nitzana	Tepper and Bar-Oz		2017-2020	A	126	1517-1	3	Light Fraction	1	17	חיטה טטרפלוידית	Triticum turgidum s.l.	פרק ציר שיבולת	rachis fragments	דגניים	Gramineae	1	1
NZN-69	Nitzana	Tepper and Bar-Oz		2017-2020	A	126	1517-1	3	Light Fraction	1	18	חיטה	Triticum	פרק ציר שיבולת	rachis fragments	דגניים	Gramineae	2	2	אולי בר זיהוי בהמשך - חשש להקספלוידית
NZN-69	Nitzana	Tepper and Bar-Oz		2017-2020	A	126	1517-1	3	Light Fraction	1	19	שעורה?	cf. Hordeum vulgare	פרק ציר שיבולת	rachis fragments	דגניים	Gramineae	4	4
NZN-69	Nitzana	Tepper and Bar-Oz		2017-2020	A	126	1517-1	3	Light Fraction	1	20	חיטה/שעורה	Hordeum/Triticum	בסיס ציר שיבולת	rachis fragments	דגניים	Gramineae	7	7
NZN-69	Nitzana	Tepper and Bar-Oz		2017-2020	A	126	1517-1	3	Light Fraction	1	21	חיטה/שעורה בגלל	Hordeum/Triticum in dung	בסיס ציר שיבולת	rachis fragments	דגניים	Gramineae	2	2
NZN-69	Nitzana	Tepper and Bar-Oz		2017-2020	A	126	1517-1	3	Light Fraction	1	22	דגני				דגניים	Gramineae	3	3
NZN-69	Nitzana	Tepper and Bar-Oz		2017-2020	A	126	1517-1	3	Light Fraction	1	23	חיטה/שעורה	Hordeum/Triticum	בסיס ציר שיבולת	basal rachis segment	דגניים	Gramineae	1	1
NZN-69	Nitzana	Tepper and Bar-Oz		2017-2020	A	126	1517-1	3	Light Fraction	1	24			שרשי דגן	roots	דגניים	Gramineae	3	3
NZN-69	Nitzana	Tepper and Bar-Oz		2017-2020	A	126	1517-1	3	Light Fraction	1	25			פרקי גבעול	culm nodes	דגניים	Gramineae	19	19
NZN-69	Nitzana	Tepper and Bar-Oz		2017-2020	A	126	1517-1	3	Light Fraction	1	26	שעורה	Hordeum sp.	גרגיר	grain	דגניים	Gramineae	4	4
NZN-69	Nitzana	Tepper and Bar-Oz		2017-2020	A	126	1517-1	3	Light Fraction	1	27	שעורה	Hordeum sp.	שבר גרגיר	grain fragment	דגניים	Gramineae
NZN-69	Nitzana	Tepper and Bar-Oz		2017-2020	A	126	1517-1	3	Light Fraction	1	28	זון אשון/רבשנתי?		גרגיר	grain	דגניים	Gramineae	6	6
NZN-69	Nitzana	Tepper and Bar-Oz		2017-2020	A	126	1517-1	3	Light Fraction	1	29	ברומית/עוקצר?		גרגיר	grain	דגניים	Gramineae	1	1	להגדיר
NZN-69	Nitzana	Tepper and Bar-Oz		2017-2020	A	126	1517-1	3	Light Fraction	1	30	ברומית/עוקצר?		גרגיר	grain	דגניים	Gramineae	1	1	לחבר
NZN-69	Nitzana	Tepper and Bar-Oz		2017-2020	A	126	1517-1	3	Light Fraction	1	31	דגני		גרגיר	grain	דגניים	Gramineae	3	3	לא להתעסק
NZN-69	Nitzana	Tepper and Bar-Oz		2017-2020	A	126	1517-1	3	Light Fraction	1	32			שברי מלען	awn fragments	דגניים	Gramineae
NZN-69	Nitzana	Tepper and Bar-Oz		2017-2020	A	126	1517-1	3	Light Fraction	1	33	גרגרנית ערבית		זרע	seed	פרפרניים	Fabaceae	12	12
NZN-69	Nitzana	Tepper and Bar-Oz		2017-2020	A	126	1517-1	3	Light Fraction	1	34	cf. אספסת	cf. Medicago	זרע	seed	פרפרניים	Fabaceae	1	1
NZN-69	Nitzana	Tepper and Bar-Oz		2017-2020	A	126	1517-1	3	Light Fraction	1	35	cf. כתרון		זרע	seed	פרפרניים	Fabaceae	1	1
NZN-69	Nitzana	Tepper and Bar-Oz		2017-2020	A	126	1517-1	3	Light Fraction	1	36	בלתי		פסיג?	cotyledon?	פרפרניים?	Fabaceae?	2	2	לא להתעסק
NZN-69	Nitzana	Tepper and Bar-Oz		2017-2020	A	126	1517-1	3	Light Fraction	1	37	מתנן שעיר	Thymelaea hirsuta	אגוזית	nutlet	מתנניים	Thymelaceae	1	1	לא מפוחם
NZN-69	Nitzana	Tepper and Bar-Oz		2017-2020	A	126	1517-1	3	Light Fraction	1	38	מתנן שעיר	Thymelaea hirsuta	עלה	leaf	מתנניים	Thymelaceae			36	5מפוחמים
NZN-69	Nitzana	Tepper and Bar-Oz		2017-2020	A	126	1517-1	3	Light Fraction	1	39	מתנן שעיר	Thymelaea hirsuta	ענף עם עלים	branch with leaves	מתנניים	Thymelaceae	1	1	לא מפוחם
NZN-69	Nitzana	Tepper and Bar-Oz		2017-2020	A	126	1517-1	3	Light Fraction	1	40	מתנן שעיר	Thymelaea hirsuta	ענף פורה עם עלים	branch with leaves	מתנניים	Thymelaceae	1	1	מפוחם
NZN-69	Nitzana	Tepper and Bar-Oz		2017-2020	A	126	1517-1	3	Light Fraction	1	41	ארנבית שרועה	Arnebia decumbrens	זרע	seed	זיפניים	Boraginaceae	1	1
NZN-69	Nitzana	Tepper and Bar-Oz		2017-2020	A	126	1517-1	3	Light Fraction	1	42	בר-עכנאי שיחני	Echiochilon fruticosum	זרע	seed	זיפניים	Boraginaceae	1	1
NZN-69	Nitzana	Tepper and Bar-Oz		2017-2020	A	126	1517-1	3	Light Fraction	1	43	סבונית השדות	Vaccaria hispanica	זרע	seed			1	1
NZN-69	Nitzana	Tepper and Bar-Oz		2017-2020	A	126	1517-1	3	Light Fraction	1	44	חלמית מצרית?		זרע	seed			1	1
NZN-69	Nitzana	Tepper and Bar-Oz		2017-2020	A	126	1517-1	3	Light Fraction	1	45	פרגה?						1	1
NZN-69	Nitzana	Tepper and Bar-Oz		2017-2020	A	126	1517-1	3	Light Fraction	1	46	תאנה??						1	1	השווה 73-71
NZN-69	Nitzana	Tepper and Bar-Oz		2017-2020	A	126	1517-1	3	Light Fraction	1	47	ציפרני החתול	Calendula sp.	זרע	seed	מורכבים	Asteraceae	1	1
NZN-69	Nitzana	Tepper and Bar-Oz		2017-2020	A	126	1517-1	3	Light Fraction	1	48	מורכבים להגדרה		קרקפת	head	מורכבים	Asteraceae	1	1
NZN-69	Nitzana	Tepper and Bar-Oz		2017-2020	A	126	1517-1	3	Light Fraction	1	49	חומעה?						1	1
NZN-69	Nitzana	Tepper and Bar-Oz		2017-2020	A	126	1517-1	3	Light Fraction	1	50	ארכוביתי?		ענף פורה				1	1	לבדוק ארכובית שבטבטית
NZN-69	Nitzana	Tepper and Bar-Oz		2017-2020	A	126	1517-1	3	Light Fraction	1	51	פרק סלקי?						1	1
NZN-69	Nitzana	Tepper and Bar-Oz		2017-2020	A	126	1517-1	3	Light Fraction	1	52	סלקי?		עלה	leaf			1	1
NZN-69	Nitzana	Tepper and Bar-Oz		2017-2020	A	126	1517-1	3	Light Fraction	1	53	חלבלוב??						1	1	יואל ראה, לחבר בהמשך
NZN-69	Nitzana	Tepper and Bar-Oz		2017-2020	A	126	1517-1	3	Light Fraction	1	54	בלתי						1	1	מוכר מNZN-71?
NZN-69	Nitzana	Tepper and Bar-Oz		2017-2020	A	126	1517-1	3	Light Fraction	1	55	בלתי		ענבה				1	1	מוכר מכמה דגימות. דמוי-אטד
NZN-69	Nitzana	Tepper and Bar-Oz		2017-2020	A	126	1517-1	3	Light Fraction	1	56	תמר??		קליפות
NZN-69	Nitzana	Tepper and Bar-Oz		2017-2020	A	126	1517-1	3	Light Fraction	1	57	זרע בגלל						2	2
NZN-69	Nitzana	Tepper and Bar-Oz		2017-2020	A	126	1517-1	3	Light Fraction	1	58	בלתי-שונות
NZN-69	Nitzana	Tepper and Bar-Oz		2017-2020	A	126	1517-1	3	Light Fraction	1	59	גללים
NZN-69	Nitzana	Tepper and Bar-Oz		2017-2020	A	126	1517-1	3	Light Fraction	1	60	חרק
NZN-70	Nitzana	Tepper and Bar-Oz		2017-2020	A	126	1517-1	3	Heavy Residue	2	1	שעורה	Hordeum	גרגיר	grain	דגניים	Gramineae	7	7
NZN-70	Nitzana	Tepper and Bar-Oz		2017-2020	A	126	1517-1	3	Heavy Residue	2	2	חיטה/שעורה	Hordeum/Triticum	גרגיר	grain	דגניים	Gramineae	4	4	כנראה שעורה 3
NZN-70	Nitzana	Tepper and Bar-Oz		2017-2020	A	126	1517-1	3	Heavy Residue	2	3	בלתי						1	1	אולי שברי קטנית
NZN-70	Nitzana	Tepper and Bar-Oz		2017-2020	A	126	1517-1	3	Heavy Residue	2	4	בלתי		קליפת זרע	seed coat fragment
NZN-70	Nitzana	Tepper and Bar-Oz		2017-2020	A	126	1517-1	3	Heavy Residue	2	5	גללים
NZN-71	Nitzana	Tepper and Bar-Oz		2017-2020	A	127	1521-1	3	Light Fraction	2	1	שעורה	Hordeum	גרגיר	grain	דגניים	Gramineae	9	9
NZN-71	Nitzana	Tepper and Bar-Oz		2017-2020	A	127	1521-1	3	Light Fraction	2	2	חיטה?	Triticum??	גרגיר	grain	דגניים	Gramineae	1	1
NZN-71	Nitzana	Tepper and Bar-Oz		2017-2020	A	127	1521-1	3	Light Fraction	2	3	חיטה/שעורה	Hordeum/Triticum	גרגיר	grain	דגניים	Gramineae	4	4
NZN-71	Nitzana	Tepper and Bar-Oz		2017-2020	A	127	1521-1	3	Light Fraction	2	4	גפן	Vitis vinifera	חרצן	pip	גפניים	Vitaceae	1	1
NZN-71	Nitzana	Tepper and Bar-Oz		2017-2020	A	127	1521-1	3	Light Fraction	2	5	גפן	Vitis vinifera	עוקץ	pedicel	גפניים	Vitaceae	3	3
NZN-71	Nitzana	Tepper and Bar-Oz		2017-2020	A	127	1521-1	3	Light Fraction	2	6	חיטה/שעורה	Hordeum/Triticum	פרקי גבעול	culm nodes	דגניים	Gramineae	3	3
NZN-71	Nitzana	Tepper and Bar-Oz		2017-2020	A	127	1521-1	3	Light Fraction	2	7	חיטה/שעורה	Hordeum/Triticum	פרק ציר שיבולת ראשון	first rachis segment	דגניים	Gramineae	1	1
NZN-71	Nitzana	Tepper and Bar-Oz		2017-2020	A	127	1521-1	3	Light Fraction	2	8	בלתי	UNIDENTIFIED	זרע	seed	פרפרניים?	Fabaceae?	3	3	2 סוגים
NZN-71	Nitzana	Tepper and Bar-Oz		2017-2020	A	127	1521-1	3	Light Fraction	2	9	גללים						1	1	לא מפוחם
NZN-71	Nitzana	Tepper and Bar-Oz		2017-2020	A	127	1521-1	3	Light Fraction	1	10	שעורה	Hordeum	גרגיר	grain	דגניים	Gramineae	3	3
NZN-71	Nitzana	Tepper and Bar-Oz		2017-2020	A	127	1521-1	3	Light Fraction	1	11	חיטה?	Triticum??	גרגיר	grain	דגניים	Gramineae	1	1
NZN-71	Nitzana	Tepper and Bar-Oz		2017-2020	A	127	1521-1	3	Light Fraction	1	12	שעורה שש-טורית	Hordeum vulgare subsp. hexastichum	פרק ציר שיבולת	rachis fragments	דגניים	Gramineae	13	13
NZN-71	Nitzana	Tepper and Bar-Oz		2017-2020	A	127	1521-1	3	Light Fraction	1	13	שעורה	Hordeum vulgare	פרק ציר שיבולת	rachis fragments	דגניים	Gramineae	4	4
NZN-71	Nitzana	Tepper and Bar-Oz		2017-2020	A	127	1521-1	3	Light Fraction	1	14	חיטה טטרפלוידית	Triticum turgidum s.l.	פרק ציר שיבולת	rachis fragments	דגניים	Gramineae	4	4
NZN-71	Nitzana	Tepper and Bar-Oz		2017-2020	A	127	1521-1	3	Light Fraction	1	15	חיטה/שעורה	Hordeum/Triticum	פרק ציר שיבולת	rachis fragments	דגניים	Gramineae	9	9
NZN-71	Nitzana	Tepper and Bar-Oz		2017-2020	A	127	1521-1	3	Light Fraction	1	16	חיטה/שעורה	Hordeum/Triticum	פרק ציר שיבולת עם גלל	rachis fragment with dung ,atrix	דגניים	Gramineae	1	1
NZN-71	Nitzana	Tepper and Bar-Oz		2017-2020	A	127	1521-1	3	Light Fraction	1	17	חיטה/שעורה	Hordeum/Triticum	בסיס ציר שיבולת	basal rachis segment	דגניים	Gramineae	1	1
NZN-71	Nitzana	Tepper and Bar-Oz		2017-2020	A	127	1521-1	3	Light Fraction	1	18	זון אשון/רבשנתי?		גרגיר	grain	דגניים	Gramineae	1	1
NZN-71	Nitzana	Tepper and Bar-Oz		2017-2020	A	127	1521-1	3	Light Fraction	1	19	ש"ש?		פרח	floret	דגניים	Gramineae	1	1
NZN-71	Nitzana	Tepper and Bar-Oz		2017-2020	A	127	1521-1	3	Light Fraction	1	20	דגני		גרגיר	grain	דגניים	Gramineae	1	1
NZN-71	Nitzana	Tepper and Bar-Oz		2017-2020	A	127	1521-1	3	Light Fraction	1	21	דגני		גרגיר	grain	דגניים	Gramineae	1	1	חיטה?
NZN-71	Nitzana	Tepper and Bar-Oz		2017-2020	A	127	1521-1	3	Light Fraction	1	22	דגני		שורשי דגן	roots	דגניים	Gramineae	1	1
NZN-71	Nitzana	Tepper and Bar-Oz		2017-2020	A	127	1521-1	3	Light Fraction	1	23	דגני		פרקי גבעול	culm nodes	דגניים	Gramineae	7	7
NZN-71	Nitzana	Tepper and Bar-Oz		2017-2020	A	127	1521-1	3	Light Fraction	1	24	cf. תאנה	cf. Ficus carica	אגוזית				2	2
NZN-71	Nitzana	Tepper and Bar-Oz		2017-2020	A	127	1521-1	3	Light Fraction	1	25	בקיה? מצליבים?						1	1
NZN-71	Nitzana	Tepper and Bar-Oz		2017-2020	A	127	1521-1	3	Light Fraction	1	26	תלתן	Trifolium sp.	זרע	seed	פרפרניים	Fabaceae	2	2
NZN-71	Nitzana	Tepper and Bar-Oz		2017-2020	A	127	1521-1	3	Light Fraction	1	27	cf. גרגרנית ערבית	cf. Trigonella arabica	זרע	seed	פרפרניים	Fabaceae	1	1
NZN-71	Nitzana	Tepper and Bar-Oz		2017-2020	A	127	1521-1	3	Light Fraction	1	28	מתנן שעיר	Thymelaea hirsuta	עלה	leaf	מתנניים	Thymelaceae	1	1	לא מפוחם
NZN-71	Nitzana	Tepper and Bar-Oz		2017-2020	A	127	1521-1	3	Light Fraction	1	29	ארנבית שרועה	Arnebia decumbrens	זרע	seed	זיפניים	Boraginaceae	1	1
NZN-71	Nitzana	Tepper and Bar-Oz		2017-2020	A	127	1521-1	3	Light Fraction	1	30	בר-עכנאי שיחני	Echiochilon fruticosum	זרע	seed	זיפניים	Boraginaceae	1	1
NZN-71	Nitzana	Tepper and Bar-Oz		2017-2020	A	127	1521-1	3	Light Fraction	1	31	לחך	Plantago	זרע	seed	לחכיים	Plantaginaceae	1	1
NZN-71	Nitzana	Tepper and Bar-Oz		2017-2020	A	127	1521-1	3	Light Fraction	1	32	שבר לבן?	Peganum harmala?					1	1
NZN-71	Nitzana	Tepper and Bar-Oz		2017-2020	A	127	1521-1	3	Light Fraction	1	33	בטנונית שעירה	Gastrocotyle hispida	קליפת זרע	seed coat fragment	זיפניים	Boraginaceae	1	1
NZN-71	Nitzana	Tepper and Bar-Oz		2017-2020	A	127	1521-1	3	Light Fraction	1	34	ציפרני החתול	Calendula sp.	זרע	seed	מורכבים	Asteraceae	1	1
NZN-71	Nitzana	Tepper and Bar-Oz		2017-2020	A	127	1521-1	3	Light Fraction	1	35	בן/שלח?		תרמיל	pod segment	מצליבים	Brassicaceae	1	1	סידור סירוגי
NZN-71	Nitzana	Tepper and Bar-Oz		2017-2020	A	127	1521-1	3	Light Fraction	1	36	cf. צנון	cf. Raphanus raphanistrum	תרמיל	pod segment	מצליבים	Brassicaceae	1	1	השווה 79-36
NZN-71	Nitzana	Tepper and Bar-Oz		2017-2020	A	127	1521-1	3	Light Fraction	1	37	דגני		טביעת עלה	leaf imprint	דגניים	Gramineae	1	1
NZN-71	Nitzana	Tepper and Bar-Oz		2017-2020	A	127	1521-1	3	Light Fraction	1	38	בלתי-שונות
NZN-71	Nitzana	Tepper and Bar-Oz		2017-2020	A	127	1521-1	3	Light Fraction	1	39	גלל		שבר
NZN-71	Nitzana	Tepper and Bar-Oz		2017-2020	A	127	1521-1	3	Light Fraction	1	40	קדד להגדרה		זרע	seed	פרפרניים	Fabaceae	1	1
NZN-72	Nitzana	Tepper and Bar-Oz		2017-2020	A	127	1521-1	3	Heavy Residue	2	1	שעורה	Hordeum	גרגיר	grain	דגניים	Gramineae	2	2
NZN-72	Nitzana	Tepper and Bar-Oz		2017-2020	A	127	1521-1	3	Heavy Residue	2	2	חיטה/שעורה	Hordeum/Triticum	גרגיר	grain	דגניים	Gramineae	1	1
NZN-72	Nitzana	Tepper and Bar-Oz		2017-2020	A	127	1521-1	3	Heavy Residue	2	3	בלתי						1	1	השווה לעיל
NZN-72	Nitzana	Tepper and Bar-Oz		2017-2020	A	127	1521-1	3	Heavy Residue	2	4	בלתי-שונות
NZN-72	Nitzana	Tepper and Bar-Oz		2017-2020	A	127	1521-1	3	Heavy Residue	2	5	גללים
NZN-73	Nitzana	Tepper and Bar-Oz		2017-2020	A	128	1524	3	Light Fraction	2	1	שעורה	Hordeum	גרגיר	grain	דגניים	Gramineae	55	55	MNI=59 with fragments
NZN-73	Nitzana	Tepper and Bar-Oz		2017-2020	A	128	1524	3	Light Fraction	2	2	חיטה	Triticum	גרגיר	grain	דגניים	Gramineae	2	2
NZN-73	Nitzana	Tepper and Bar-Oz		2017-2020	A	128	1524	3	Light Fraction	2	3	חיטה/שעורה	Hordeum/Triticum	גרגיר	grain	דגניים	Gramineae	10	10	שווה לבדוק שוב 2 מתוכם
NZN-73	Nitzana	Tepper and Bar-Oz		2017-2020	A	128	1524	3	Light Fraction	2	4	גפן	Vitis vinifera	חרצן	pip	גפניים	Vitaceae	1	1
NZN-73	Nitzana	Tepper and Bar-Oz		2017-2020	A	128	1524	3	Light Fraction	2	5	שעורה?	Hordeum	גרגיר	grain	דגניים	Gramineae	2	2	שעורת בר? דו-טורית?
NZN-73	Nitzana	Tepper and Bar-Oz		2017-2020	A	128	1524	3	Light Fraction	2	6			פרקי גבעול	culm nodes	דגניים	Gramineae	26	26	מתוכם 8 שורשים
NZN-73	Nitzana	Tepper and Bar-Oz		2017-2020	A	128	1524	3	Light Fraction	2	7	זית	Olea europaea	שבר וגלעין	stone and fragment	זיתיים	Oleaceae	2	2
NZN-73	Nitzana	Tepper and Bar-Oz		2017-2020	A	128	1524	3	Light Fraction	2	8	בקיית הכרשינה	Vicia ervilia	זרע	seed	פרפרניים	Fabaceae	1	1
NZN-73	Nitzana	Tepper and Bar-Oz		2017-2020	A	128	1524	3	Light Fraction	2	9	בקיה תרבותית	Vicia sativa	זרע	seed	פרפרניים	Fabaceae	1	1	בקופסה עם כל הקטניות
NZN-73	Nitzana	Tepper and Bar-Oz		2017-2020	A	128	1524	3	Light Fraction	2	10	להגדרה		זרע	seed	פרפרניים	Fabaceae	1	1	עמ' 188
NZN-73	Nitzana	Tepper and Bar-Oz		2017-2020	A	128	1524	3	Light Fraction	2	11	קטנית		פסיג	cotyledon	פרפרניים	Fabaceae	1	1	שטוח, פחוס, אולי עדשה
NZN-73	Nitzana	Tepper and Bar-Oz		2017-2020	A	128	1524	3	Light Fraction	2	12	בקיי	Viciae	פסיג וזרע	seed and cotyledon	פרפרניים	Fabaceae	2	2
NZN-73	Nitzana	Tepper and Bar-Oz		2017-2020	A	128	1524	3	Light Fraction	2	13	סלק	Beta vulgaris	פרודה	mericarp	סלקיים	Chenopodiaceae	1	1	השווה לעיל, 29-5, 39-8, 33-13
NZN-73	Nitzana	Tepper and Bar-Oz		2017-2020	A	128	1524	3	Light Fraction	2	14	דבקה	Galium sp.	זרע	seed	פואתיים	Rubiaceae	3	3
NZN-73	Nitzana	Tepper and Bar-Oz		2017-2020	A	128	1524	3	Light Fraction	2	15	אשל הפרקים	Tamarix aphylla	פרקים	scales	אשליים	Tamaricaceae			רצנטי??
NZN-73	Nitzana	Tepper and Bar-Oz		2017-2020	A	128	1524	3	Light Fraction	2	16	תמר מצוי?	cf. Phoenix dactylifera	שברי גלעין	stone fragment	דקליים?	cf. Palmae
NZN-73	Nitzana	Tepper and Bar-Oz		2017-2020	A	128	1524	3	Light Fraction	2	17	בלתי-שונות
NZN-73	Nitzana	Tepper and Bar-Oz		2017-2020	A	128	1524	3	Light Fraction	2	18	גללים
NZN-73	Nitzana	Tepper and Bar-Oz		2017-2020	A	128	1524	3	Light Fraction	1	19	שעורה שש-טורית	Hordeum vulgare subsp. hexastichum	פרק ציר שיבולת	rachis fragments	דגניים	Gramineae	24	24
NZN-73	Nitzana	Tepper and Bar-Oz		2017-2020	A	128	1524	3	Light Fraction	1	20	שעורה דו-טורית/התבור	Hordeum vulgare subsp. distichum/spontaneum	פרק ציר שיבולת	rachis fragments	דגניים	Gramineae	6	6
NZN-73	Nitzana	Tepper and Bar-Oz		2017-2020	A	128	1524	3	Light Fraction	1	21	שעורה	Hordeum vulgare	פרק ציר שיבולת	rachis fragments	דגניים	Gramineae	34	34
NZN-73	Nitzana	Tepper and Bar-Oz		2017-2020	A	128	1524	3	Light Fraction	1	22	שעורה?	cf. Hordeum vulgare	פרק ציר שיבולת	rachis fragments	דגניים	Gramineae	16	16	3פריטים לא נספרו
NZN-73	Nitzana	Tepper and Bar-Oz		2017-2020	A	128	1524	3	Light Fraction	1	23	שעורה	Hordeum vulgare	בסיס ציר שיבולת	basal rachis fragments	דגניים	Gramineae	3	3
NZN-73	Nitzana	Tepper and Bar-Oz		2017-2020	A	128	1524	3	Light Fraction	1	24	חיטה/שעורה	Hordeum/Triticum	בסיס ציר שיבולת	basal rachis segment	דגניים	Gramineae	1	1
NZN-73	Nitzana	Tepper and Bar-Oz		2017-2020	A	128	1524	3	Light Fraction	1	25	חיטה טטרפלוידית	Triticum turgidum s.l.	פרק ציר שיבולת	rachis fragments	דגניים	Gramineae	15	15
NZN-73	Nitzana	Tepper and Bar-Oz		2017-2020	A	128	1524	3	Light Fraction	1	26	cf. חיטת הלחם	cf. Triticum aestivum s.l.	פרק ציר שיבולת	rachis fragments	דגניים	Gramineae	2	2
NZN-73	Nitzana	Tepper and Bar-Oz		2017-2020	A	128	1524	3	Light Fraction	1	27	דגני		פרק ציר שיבולת	rachis fragments	דגניים	Gramineae	2	2
NZN-73	Nitzana	Tepper and Bar-Oz		2017-2020	A	128	1524	3	Light Fraction	1	28	גפן	Vitis vinifera	חרצן	pip	גפניים	Vitaceae	7	7	לפי MNI של עוקצים
NZN-73	Nitzana	Tepper and Bar-Oz		2017-2020	A	128	1524	3	Light Fraction	1	29	גפן	Vitis vinifera	עוקץ	pedicel	גפניים	Vitaceae	5	5
NZN-73	Nitzana	Tepper and Bar-Oz		2017-2020	A	128	1524	3	Light Fraction	1	30	cf. גפן	cf. Vitis vinifera	פרח לא פורה	unfertilized flower	גפניים	Vitaceae	1	1
NZN-73	Nitzana	Tepper and Bar-Oz		2017-2020	A	128	1524	3	Light Fraction	1	31	שעורה להגדרה	Hordeum sp.	גרגיר	grain	דגניים	Gramineae	4	4
NZN-73	Nitzana	Tepper and Bar-Oz		2017-2020	A	128	1524	3	Light Fraction	1	32	שעורה להגדרה	Hordeum sp.	גרגיר	grain	דגניים	Gramineae	2	2
NZN-73	Nitzana	Tepper and Bar-Oz		2017-2020	A	128	1524	3	Light Fraction	1	33	דגני		גרגיר	grain	דגניים	Gramineae	9	9	לא נראה לי בר הגדרה, אבל דומה לשעורה
NZN-73	Nitzana	Tepper and Bar-Oz		2017-2020	A	128	1524	3	Light Fraction	1	34	דגני		גרגיר	grain	דגניים	Gramineae	4	4	שונות ושברים, לא להגדרה
NZN-73	Nitzana	Tepper and Bar-Oz		2017-2020	A	128	1524	3	Light Fraction	1	35	זון משבר?		גרגיר	grain	דגניים	Gramineae	4	4
NZN-73	Nitzana	Tepper and Bar-Oz		2017-2020	A	128	1524	3	Light Fraction	1	36	זון אשון/רבשנתי?		גרגיר	grain	דגניים	Gramineae	19	19
NZN-73	Nitzana	Tepper and Bar-Oz		2017-2020	A	128	1524	3	Light Fraction	1	37	עוקצר/ברומית?		גרגיר	grain	דגניים	Gramineae	11	11
NZN-73	Nitzana	Tepper and Bar-Oz		2017-2020	A	128	1524	3	Light Fraction	1	38	חפורית קטנה?		גרגיר	grain	דגניים	Gramineae	1	1
NZN-73	Nitzana	Tepper and Bar-Oz		2017-2020	A	128	1524	3	Light Fraction	1	39	חפורית?		גרגיר	grain	דגניים	Gramineae	1	1
NZN-73	Nitzana	Tepper and Bar-Oz		2017-2020	A	128	1524	3	Light Fraction	1	40	דגני		שורשי דגן	roots	דגניים	Gramineae	11	11
NZN-73	Nitzana	Tepper and Bar-Oz		2017-2020	A	128	1524	3	Light Fraction	1	41	דגני		פרקי גבעול	culm nodes	דגניים	Gramineae	68	68
NZN-73	Nitzana	Tepper and Bar-Oz		2017-2020	A	128	1524	3	Light Fraction	1	42	דגני		שברי מלען	awn fragments	דגניים	Gramineae
NZN-73	Nitzana	Tepper and Bar-Oz		2017-2020	A	128	1524	3	Light Fraction	1	43	גרגרנית ערבית		זרע	seed	פרפרניים	Fabaceae	7	7
NZN-73	Nitzana	Tepper and Bar-Oz		2017-2020	A	128	1524	3	Light Fraction	1	44	שברק?		זרע	seed	פרפרניים	Fabaceae	1	1	נפסל מגרגרנית ערבית בשל קוצר שורשון ודגם בסידור קווי
NZN-73	Nitzana	Tepper and Bar-Oz		2017-2020	A	128	1524	3	Light Fraction	1	45	פרפרני	Trifolium sp.?	זרע	seed	פרפרניים	Fabaceae	114	114	דומה לגרגרנית ערבית
NZN-73	Nitzana	Tepper and Bar-Oz		2017-2020	A	128	1524	3	Light Fraction	1	46	cf. תלתן	cf. Trifolium sp.	זרע	seed	פרפרניים	Fabaceae	36	36
NZN-73	Nitzana	Tepper and Bar-Oz		2017-2020	A	128	1524	3	Light Fraction	1	47	פרפרני קטן		זרע	seed	פרפרניים	Fabaceae	30	30	דומה לקודמים אך שרופים מדיי להגדיר
NZN-73	Nitzana	Tepper and Bar-Oz		2017-2020	A	128	1524	3	Light Fraction	1	48	אספסת מצויה/הים	Medicago polymorpha/marina	זרע	seed	פרפרניים	Fabaceae	2	2
NZN-73	Nitzana	Tepper and Bar-Oz		2017-2020	A	128	1524	3	Light Fraction	1	49	בקיי	Viciae	פסיג	cotyledon	פרפרניים	Fabaceae	1	1
NZN-73	Nitzana	Tepper and Bar-Oz		2017-2020	A	128	1524	3	Light Fraction	1	50	זנב-עקרב שיכני	Scorpiurus muricatus	פרק תרמיל	pod segment	פרפרניים	Fabaceae	1	1
NZN-73	Nitzana	Tepper and Bar-Oz		2017-2020	A	128	1524	3	Light Fraction	1	51	מתנן שעיר	Thymelaea hirsuta	אגוזית	nutlet	מתנניים	Thymelaceae	7	7
NZN-73	Nitzana	Tepper and Bar-Oz		2017-2020	A	128	1524	3	Light Fraction	1	52	מתנן שעיר	Thymelaea hirsuta	עלה	leaf	מתנניים	Thymelaceae	18	18
NZN-73	Nitzana	Tepper and Bar-Oz		2017-2020	A	128	1524	3	Light Fraction	1	53	מתנן שעיר	Thymelaea hirsuta	ענף פורה עם עלים	bud with leaves	מתנניים	Thymelaceae	5	5
NZN-73	Nitzana	Tepper and Bar-Oz		2017-2020	A	128	1524	3	Light Fraction	1	54	חלמית קטנת-פרחים/חדת-אונות	Malva parviflora/oxyloba	זרע	seed	חלמיתיים	Malvaceae	3	3
NZN-73	Nitzana	Tepper and Bar-Oz		2017-2020	A	128	1524	3	Light Fraction	1	55	ציפרני החתול	Calendula sp.	זרע	seed	מורכבים	Asteraceae	2	2
NZN-73	Nitzana	Tepper and Bar-Oz		2017-2020	A	128	1524	3	Light Fraction	1	56	ארנבית שרועה	Arnebia decumbrens	זרע	seed	זיפניים	Boraginaceae	2	2
NZN-73	Nitzana	Tepper and Bar-Oz		2017-2020	A	128	1524	3	Light Fraction	1	57	גלעינית זעירת פרחים	Buglossoides tenuiflora	זרע	seed	זיפניים	Boraginaceae	1	1
NZN-73	Nitzana	Tepper and Bar-Oz		2017-2020	A	128	1524	3	Light Fraction	1	58	גבסנית שעירה	Gypsophila pilosa	זרע	seed	ציפורניים	Caryophyllaceae	1	1
NZN-73	Nitzana	Tepper and Bar-Oz		2017-2020	A	128	1524	3	Light Fraction	1	59	פרגה	Glaucium sp.	זרע	seed	פרגיים	Papaveraceae	3	3
NZN-73	Nitzana	Tepper and Bar-Oz		2017-2020	A	128	1524	3	Light Fraction	1	60	סבונית השדות	Vaccaria hispanica	זרע	seed	ציפורניים	Caryophyllaceae	7	7
NZN-73	Nitzana	Tepper and Bar-Oz		2017-2020	A	128	1524	3	Light Fraction	1	61	cf. סבונית השדות	cf. Vaccaria hispanica	זרע	seed	ציפורניים	Caryophyllaceae	2	2
NZN-73	Nitzana	Tepper and Bar-Oz		2017-2020	A	128	1524	3	Light Fraction	1	62	אמיך קוצני?		זרע	seed	ארכוביתיים	Polygonaceae	2	2
NZN-73	Nitzana	Tepper and Bar-Oz		2017-2020	A	128	1524	3	Light Fraction	1	63	חבלבל	Convolvulus	זרע	seed	Convolvulaceae	חבלבליים	1	1
NZN-73	Nitzana	Tepper and Bar-Oz		2017-2020	A	128	1524	3	Light Fraction	1	64	דבקה	Galium sp.	זרע	seed	Rubiaceae	פואתיים	1	1
NZN-73	Nitzana	Tepper and Bar-Oz		2017-2020	A	128	1524	3	Light Fraction	1	65	סלק מצוי	Beta vulgaris	זרע	seed	Chenopodiaceae	סלקיים	2	2
NZN-73	Nitzana	Tepper and Bar-Oz		2017-2020	A	128	1524	3	Light Fraction	1	66	פרקים סלקיים		פרקים	scales	Chenopodiaceae	סלקיים	2	2
NZN-73	Nitzana	Tepper and Bar-Oz		2017-2020	A	128	1524	3	Light Fraction	1	67	בלתי		זרע	seed	Chenopodiaceae?	?סלקיים	1	1	לחבר בהמשך
NZN-73	Nitzana	Tepper and Bar-Oz		2017-2020	A	128	1524	3	Light Fraction	1	68	סלק? שברק?	UNIDENTIFIED	זרע	seed			2	2	מזכיר זרע פנימי של סלק. גם דומה מאד לשברק שעיר
NZN-73	Nitzana	Tepper and Bar-Oz		2017-2020	A	128	1524	3	Light Fraction	1	69	מלוח??						1	1	לחבר בהמשך
NZN-73	Nitzana	Tepper and Bar-Oz		2017-2020	A	128	1524	3	Light Fraction	1	70	בלתי						1	1	יואל ראה, צריך לחשוב
NZN-73	Nitzana	Tepper and Bar-Oz		2017-2020	A	128	1524	3	Light Fraction	1	71	תאנה??						1	1	לחבר בהמשך
NZN-73	Nitzana	Tepper and Bar-Oz		2017-2020	A	128	1524	3	Light Fraction	1	72	בלתי		עוקץ	pedicel			1	1	לחבר בהמשך
NZN-73	Nitzana	Tepper and Bar-Oz		2017-2020	A	128	1524	3	Light Fraction	1	73	מרור רצנטי?						1	1
NZN-73	Nitzana	Tepper and Bar-Oz		2017-2020	A	128	1524	3	Light Fraction	1	74	בלתי-שונות
NZN-73	Nitzana	Tepper and Bar-Oz		2017-2020	A	128	1524	3	Light Fraction	1	75	זרע בגלל?
NZN-73	Nitzana	Tepper and Bar-Oz		2017-2020	A	128	1524	3	Light Fraction	1	76	גלל
NZN-73	Nitzana	Tepper and Bar-Oz		2017-2020	A	128	1524	3	Light Fraction	1	77	גלל?
NZN-73	Nitzana	Tepper and Bar-Oz		2017-2020	A	128	1524	3	Light Fraction	1	78	חרק
NZN-73	Nitzana	Tepper and Bar-Oz		2017-2020	A	128	1524	3	Light Fraction	1	79	עצם
NZN-73	Nitzana	Tepper and Bar-Oz		2017-2020	A	128	1524	3	Light Fraction	1	80	אספסת?		זרע	seed	פרפרניים	Fabaceae	1	1
NZN-73	Nitzana	Tepper and Bar-Oz		2017-2020	A	128	1524	3	Light Fraction	0.5	81	דגני		גרגיר	grain	דגניים	Gramineae	6	6
NZN-73	Nitzana	Tepper and Bar-Oz		2017-2020	A	128	1524	3	Light Fraction	0.5	82	חפורי	Phalaris	זרע	seed	דגניים	Gramineae	5	5
NZN-73	Nitzana	Tepper and Bar-Oz		2017-2020	A	128	1524	3	Light Fraction	0.5	83	זון?	Lolium?	גרגיר	grain	דגניים	Gramineae	10	10
NZN-73	Nitzana	Tepper and Bar-Oz		2017-2020	A	128	1524	3	Light Fraction	0.5	84	יבלית מצויה		זרע				10s	10s
NZN-73	Nitzana	Tepper and Bar-Oz		2017-2020	A	128	1524	3	Light Fraction	0.5	85	קוטנדיה?דגני		גרגיר	grain	דגניים	Gramineae	3	3
NZN-73	Nitzana	Tepper and Bar-Oz		2017-2020	A	128	1524	3	Light Fraction	0.5	86	שיבולת שועל	Avena sp.					8	8	סליל + סלקט
NZN-73	Nitzana	Tepper and Bar-Oz		2017-2020	A	128	1524	3	Light Fraction	0.5	87	דגני			rachis	דגניים	Gramineae	10s	10s
NZN-73	Nitzana	Tepper and Bar-Oz		2017-2020	A	128	1524	3	Light Fraction	0.5	88				culm node			5	5
NZN-73	Nitzana	Tepper and Bar-Oz		2017-2020	A	128	1524	3	Light Fraction	0.5	89	מלען וגלומה		שברים
NZN-73	Nitzana	Tepper and Bar-Oz		2017-2020	A	128	1524	3	Light Fraction	0.5	90	גפן		שברי חרצן		גפניים	Vitaceae	9	9
NZN-73	Nitzana	Tepper and Bar-Oz		2017-2020	A	128	1524	3	Light Fraction	0.5	91	פרפרני קטן/גרגרנית/תלתן		זרע?		פרפרניים	Fabaceae	18	18
NZN-73	Nitzana	Tepper and Bar-Oz		2017-2020	A	128	1524	3	Light Fraction	0.5	92	תאנה		אגוזית	nutlet			49	49
NZN-73	Nitzana	Tepper and Bar-Oz		2017-2020	A	128	1524	3	Light Fraction	0.5	93	אספסת	Medicago sp.	זרע?	seed	פרפרניים	Fabaceae	1	1
NZN-73	Nitzana	Tepper and Bar-Oz		2017-2020	A	128	1524	3	Light Fraction	0.5	94	קדד/גרגרנית		זרע?	seed	פרפרניים	Fabaceae	1	1
NZN-73	Nitzana	Tepper and Bar-Oz		2017-2020	A	128	1524	3	Light Fraction	0.5	95	גרגרנית ערבית		זרע?		פרפרניים	Fabaceae	6	6
NZN-73	Nitzana	Tepper and Bar-Oz		2017-2020	A	128	1524	3	Light Fraction	0.5	96	תלתן/רכפה		זרע?	seed	פרפרניים	Fabaceae	1	1
NZN-73	Nitzana	Tepper and Bar-Oz		2017-2020	A	128	1524	3	Light Fraction	0.5	97	רכפה ליואל?		זרע?		פרפרניים	Fabaceae	4	4
NZN-73	Nitzana	Tepper and Bar-Oz		2017-2020	A	128	1524	3	Light Fraction	0.5	98	רכפה		זרע		פרפרניים	Fabaceae	3	3	כנראה מגובששת
NZN-73	Nitzana	Tepper and Bar-Oz		2017-2020	A	128	1524	3	Light Fraction	0.5	99	פרגה		זרע				1	1
NZN-73	Nitzana	Tepper and Bar-Oz		2017-2020	A	128	1524	3	Light Fraction	0.5	100	מרגנית		זרע		פרפרניים	Fabaceae	2	2
NZN-73	Nitzana	Tepper and Bar-Oz		2017-2020	A	128	1524	3	Light Fraction	0.5	101	פרפרני? ליואל				פרפרניים	Fabaceae	6	6
NZN-73	Nitzana	Tepper and Bar-Oz		2017-2020	A	128	1524	3	Light Fraction	0.5	102	מתנן שעיר	Thymelaea hirsuta	אגוזית	nutlet	מתנניים	Thymelaceae	1	1
NZN-73	Nitzana	Tepper and Bar-Oz		2017-2020	A	128	1524	3	Light Fraction	0.5	103	אשל הפרקים	Tamarix aphylla	זרע?				1	1
NZN-73	Nitzana	Tepper and Bar-Oz		2017-2020	A	128	1524	3	Light Fraction	0.5	104	מתנן שעיר	Thymelaea hirsuta	עלה	leaf	מתנניים	Thymelaceae	33	33
NZN-73	Nitzana	Tepper and Bar-Oz		2017-2020	A	128	1524	3	Light Fraction	0.5	105	בן-שלח	Erucaria microcarpa	מקור/תרמיל				2	2
NZN-73	Nitzana	Tepper and Bar-Oz		2017-2020	A	128	1524	3	Light Fraction	0.5	106	חיעד ספרדי		זרע?				4	4
NZN-73	Nitzana	Tepper and Bar-Oz		2017-2020	A	128	1524	3	Light Fraction	0.5	107	בלתי-שונות
NZN-73	Nitzana	Tepper and Bar-Oz		2017-2020	A	128	1524	3	Light Fraction	0.5	108	שלוחית שעירה/קרחת	Andrachne telephioides/aspera	זרע?		חלבלוביים	Euphorbiaceae	2	2
NZN-73	Nitzana	Tepper and Bar-Oz		2017-2020	A	128	1524	3	Light Fraction	0.5	109	בלתי - דמוי אשליל	Reaumuria sp.	זרע?		אשליים	Tamaricaceae	7	7
NZN-73	Nitzana	Tepper and Bar-Oz		2017-2020	A	128	1524	3	Light Fraction	0.5	110	כף-אווז		זרע?				10	10	האשפות
NZN-73	Nitzana	Tepper and Bar-Oz		2017-2020	A	128	1524	3	Light Fraction	0.5	111	מורכבים-קרקכת		זרע?				1	1
NZN-73	Nitzana	Tepper and Bar-Oz		2017-2020	A	128	1524	3	Light Fraction	0.5	112	מורכבים		זרעון				5	5
NZN-73	Nitzana	Tepper and Bar-Oz		2017-2020	A	128	1524	3	Light Fraction	0.5	113	ציפרני החתול		זרע?				1	1
NZN-73	Nitzana	Tepper and Bar-Oz		2017-2020	A	128	1524	3	Light Fraction	0.5	114	בוצין?		זרע?		פיגמיים		1	1
NZN-73	Nitzana	Tepper and Bar-Oz		2017-2020	A	128	1524	3	Light Fraction	0.5	115	חרק						1	1
NZN-73	Nitzana	Tepper and Bar-Oz		2017-2020	A	128	1524	3	Light Fraction	0.5	116	גלל		שבר						רק חלק נאסף
NZN-73	Nitzana	Tepper and Bar-Oz		2017-2020	A	128	1524	3	Light Fraction	0.5	117	חלמית מצרית?		זרע				2	2
NZN-73	Nitzana	Tepper and Bar-Oz		2017-2020	A	128	1524	3	Light Fraction	0.5	118	חלמית קטנת-פרחים/חדת-אונות		זרע?				1	1
NZN-73	Nitzana	Tepper and Bar-Oz		2017-2020	A	128	1524	3	Light Fraction	0.5	119	ליואל
NZN-73	Nitzana	Tepper and Bar-Oz		2017-2020	A	128	1524	3	Light Fraction	0.5	120
NZN-74	Nitzana	Tepper and Bar-Oz		2017-2020	A	128	1524	3	Heavy Residue	2	1	שעורה	Hordeum	גרגיר	grain	דגניים	Gramineae	64	64	MNI=78 with fragments
NZN-74	Nitzana	Tepper and Bar-Oz		2017-2020	A	128	1524	3	Heavy Residue	2	2	חיטה	Triticum	גרגיר	grain	דגניים	Gramineae	1	1
NZN-74	Nitzana	Tepper and Bar-Oz		2017-2020	A	128	1524	3	Heavy Residue	2	3	חיטה/שעורה	Hordeum/Triticum	גרגיר	grain	דגניים	Gramineae	8	8	אולי זון אחד, לעבור שוב
NZN-74	Nitzana	Tepper and Bar-Oz		2017-2020	A	128	1524	3	Heavy Residue	2	4	גפן	Vitis vinifera	חרצן	pip	גפניים	Vitaceae	1	1
NZN-74	Nitzana	Tepper and Bar-Oz		2017-2020	A	128	1524	3	Heavy Residue	2	5	עדשה	Lens culinaris	פסיג וזרע	cotyledon and seed	פרפרניים	Fabaceae	6	6	לוודא
NZN-74	Nitzana	Tepper and Bar-Oz		2017-2020	A	128	1524	3	Heavy Residue	2	6	בקיה תרבותית	Vicia sativa	זרע	seed	פרפרניים	Fabaceae	1	1
NZN-74	Nitzana	Tepper and Bar-Oz		2017-2020	A	128	1524	3	Heavy Residue	2	7	בקיה תרבותית	Vicia sativa	זרע	seed	פרפרניים	Fabaceae	1	1	במחברת ומיואל
NZN-74	Nitzana	Tepper and Bar-Oz		2017-2020	A	128	1524	3	Heavy Residue	2	8	בקיה תרבותית	Vicia sativa	זרע	seed	פרפרניים	Fabaceae	1	1
NZN-74	Nitzana	Tepper and Bar-Oz		2017-2020	A	128	1524	3	Heavy Residue	2	9	קטנית		פסיג	cotyledon	פרפרניים	Fabaceae	1	1	לא להתעסק
NZN-74	Nitzana	Tepper and Bar-Oz		2017-2020	A	128	1524	3	Heavy Residue	2	10	זית	Olea europaea	שבר וגלעין	stone and fragment	זיתיים	Oleaceae	2	2
NZN-74	Nitzana	Tepper and Bar-Oz		2017-2020	A	128	1524	3	Heavy Residue	2	11	זית	Olea europaea	גלעין	stone	זיתיים	Oleaceae	1	1
NZN-74	Nitzana	Tepper and Bar-Oz		2017-2020	A	128	1524	3	Heavy Residue	2	12	זית	Olea europaea	גלעין	stone	זיתיים	Oleaceae	1	1
NZN-74	Nitzana	Tepper and Bar-Oz		2017-2020	A	128	1524	3	Heavy Residue	2	13	שברי דגן		שבר גרגיר	seed fragment	דגניים	Gramineae
NZN-74	Nitzana	Tepper and Bar-Oz		2017-2020	A	128	1524	3	Heavy Residue	2	14	בלתי-שונות
NZN-74	Nitzana	Tepper and Bar-Oz		2017-2020	A	128	1524	3	Heavy Residue	2	15	גללים								מטיפוסים שונים	שווה בדיקה
NZN-75	Nitzana	Tepper and Bar-Oz		2017-2020	A	129	1533-1	3	Light Fraction	2	1	שעורה	Hordeum	גרגיר	grain	דגניים	Gramineae	15	15	MNI=16
NZN-75	Nitzana	Tepper and Bar-Oz		2017-2020	A	129	1533-1	3	Light Fraction	2	2	גפן	Vitis vinifera	חרצן	pip	גפניים	Vitaceae	3	3
NZN-75	Nitzana	Tepper and Bar-Oz		2017-2020	A	129	1533-1	3	Light Fraction	2	3	גפן	Vitis vinifera	עוקץ	pedicel	גפניים	Vitaceae	2	2
NZN-75	Nitzana	Tepper and Bar-Oz		2017-2020	A	129	1533-1	3	Light Fraction	2	4	גפן	Vitis vinifera	זג	grapeskin	גפניים	Vitaceae	2	2
NZN-75	Nitzana	Tepper and Bar-Oz		2017-2020	A	129	1533-1	3	Light Fraction	2	5	שעורה שש-טורית	Hordeum vulgare subsp. hexastichum	פרק ציר שיבולת	rachis fragments	דגניים	Gramineae	2	2	one with 3 segments
NZN-75	Nitzana	Tepper and Bar-Oz		2017-2020	A	129	1533-1	3	Light Fraction	2	6	cf. שעורה שש-טורית	cf. Hordeum vulgare subsp. hexastichum	צווארון בסיס ציר שיבולת	collar and basal rachis fragments	דגניים	Gramineae	1	1
NZN-75	Nitzana	Tepper and Bar-Oz		2017-2020	A	129	1533-1	3	Light Fraction	2	7	עדשה	Lens culinaris	זרע	seed	פרפרניים	Fabaceae	1	1
NZN-75	Nitzana	Tepper and Bar-Oz		2017-2020	A	129	1533-1	3	Light Fraction	2	8	סלק מצוי	Beta vulgaris	פרודה	mericarp	סלקיים	Chenopodiaceae	1	1
NZN-75	Nitzana	Tepper and Bar-Oz		2017-2020	A	129	1533-1	3	Light Fraction	2	9			פרקי גבעול	culm nodes	דגניים	Gramineae	16	16
NZN-75	Nitzana	Tepper and Bar-Oz		2017-2020	A	129	1533-1	3	Light Fraction	2	10			שורשי דגן	roots			3	3
NZN-75	Nitzana	Tepper and Bar-Oz		2017-2020	A	129	1533-1	3	Light Fraction	2	11	פיקוס התאנה	Ficus carica	ציפה ואגוזיות	pulp and nutlets					יואל: 90%
NZN-75	Nitzana	Tepper and Bar-Oz		2017-2020	A	129	1533-1	3	Light Fraction	2	12	מתנן שעיר	Thymelaea hirsuta	עלה	leaf	מתנניים	Thymelaceae	1	1
NZN-75	Nitzana	Tepper and Bar-Oz		2017-2020	A	129	1533-1	3	Light Fraction	2	13	עולש? צמרנית הסלעים? קיצת?		זרע	seed	מורכבים		1	1
NZN-75	Nitzana	Tepper and Bar-Oz		2017-2020	A	129	1533-1	3	Light Fraction	2	14	בקיי	Vicieae	זרע	seed	פרפרניים	Fabaceae	1	1	לא להתעסק
NZN-75	Nitzana	Tepper and Bar-Oz		2017-2020	A	129	1533-1	3	Light Fraction	2	15	זנב-עקרב שיכני	Scorpiurus muricatus	זרע	seed	פרפרניים	Fabaceae	1	1	יואל אישר
NZN-75	Nitzana	Tepper and Bar-Oz		2017-2020	A	129	1533-1	3	Light Fraction	2	16	מצעית מורכבים		מצעית	receptacle	מורכבים		2	2	להגדרה - חפים עם בליטה, מצעית צינורית
NZN-75	Nitzana	Tepper and Bar-Oz		2017-2020	A	129	1533-1	3	Light Fraction	2	17	ארכוביתי?						1	1	פסלנו גמאיים וחבלבל. גם כוסמת. לעבור על ארכוביתיים
NZN-75	Nitzana	Tepper and Bar-Oz		2017-2020	A	129	1533-1	3	Light Fraction	2	18	תמר??		קליפה
NZN-75	Nitzana	Tepper and Bar-Oz		2017-2020	A	129	1533-1	3	Light Fraction	2	19	בלתי-שונות
NZN-75	Nitzana	Tepper and Bar-Oz		2017-2020	A	129	1533-1	3	Light Fraction	2	20	גללים								מטיפוסים שונים	שווה בדיקה
NZN-75	Nitzana	Tepper and Bar-Oz		2017-2020	A	129	1533-1	3	Light Fraction	1	21	גפן	Vitis vinifera	שבר אנדוספרם	endosperm fragment	גפניים	Vitaceae	2	2
NZN-75	Nitzana	Tepper and Bar-Oz		2017-2020	A	129	1533-1	3	Light Fraction	1	22	גפן	Vitis vinifera	עוקץ	pedicel	גפניים	Vitaceae	2	2
NZN-75	Nitzana	Tepper and Bar-Oz		2017-2020	A	129	1533-1	3	Light Fraction	1	23	שעורה שש-טורית	Hordeum vulgare subsp. hexastichum	פרק ציר שיבולת	rachis fragments	דגניים	Gramineae	37	37
NZN-75	Nitzana	Tepper and Bar-Oz		2017-2020	A	129	1533-1	3	Light Fraction	1	24	שעורה שש-טורית	Hordeum vulgare subsp. hexastichum	בסיס ציר שיבולת	basal rachis segment	דגניים	Gramineae	1	1	with 4 segments
NZN-75	Nitzana	Tepper and Bar-Oz		2017-2020	A	129	1533-1	3	Light Fraction	1	25	שעורה דו-טורית/התבור	Hordeum vulgare subsp. disticum/spontaneum	פרק ציר שיבולת	rachis fragments	דגניים	Gramineae	10	10
NZN-75	Nitzana	Tepper and Bar-Oz		2017-2020	A	129	1533-1	3	Light Fraction	1	26	cf. שעורה דו-טורית/התבור	cf. Hordeum vulgare subsp. disticum/spontaneum	פרק ציר שיבולת	rachis fragments	דגניים	Gramineae	6	6
NZN-75	Nitzana	Tepper and Bar-Oz		2017-2020	A	129	1533-1	3	Light Fraction	1	27	cf. שעורה דו-טורית/התבור	cf. Hordeum vulgare subsp. disticum/spontaneum	בסיס ציר שיבולת	basal rachis segment	דגניים	Gramineae	1	1
NZN-75	Nitzana	Tepper and Bar-Oz		2017-2020	A	129	1533-1	3	Light Fraction	1	28	שעורה	Hordeum vulgare	פרק ציר שיבולת	rachis fragments	דגניים	Gramineae	14	14
NZN-75	Nitzana	Tepper and Bar-Oz		2017-2020	A	129	1533-1	3	Light Fraction	1	29	שעורה	Hordeum vulgare	בסיס ציר שיבולת	basal rachis segment	דגניים	Gramineae	3	3
NZN-75	Nitzana	Tepper and Bar-Oz		2017-2020	A	129	1533-1	3	Light Fraction	1	30	שעורה	Hordeum vulgare	צווארון בסיס ציר שיבולת	collar and basal rachis segment	דגניים	Gramineae	1	1	with 4 segments
NZN-75	Nitzana	Tepper and Bar-Oz		2017-2020	A	129	1533-1	3	Light Fraction	1	31	שעורה?	cf. Hordeum vulgare	פרק ציר שיבולת	rachis fragments	דגניים	Gramineae	2	2
NZN-75	Nitzana	Tepper and Bar-Oz		2017-2020	A	129	1533-1	3	Light Fraction	1	32	חיטה טטרפלוידית	Triticum turgidum s.l.	פרק ציר שיבולת	rachis fragments	דגניים	Gramineae	8	8
NZN-75	Nitzana	Tepper and Bar-Oz		2017-2020	A	129	1533-1	3	Light Fraction	1	33	חיטה	Triticum	פרק ציר שיבולת	rachis fragments	דגניים	Gramineae	1	1
NZN-75	Nitzana	Tepper and Bar-Oz		2017-2020	A	129	1533-1	3	Light Fraction	1	34	חיטה/שעורה	Hordeum/Triticum	פרק ציר שיבולת	rachis fragments	דגניים	Gramineae	19	19	1 with 2 segments
NZN-75	Nitzana	Tepper and Bar-Oz		2017-2020	A	129	1533-1	3	Light Fraction	1	35	חיטה/שעורה	Hordeum/Triticum	בסיס ציר שיבולת	basal rachis segment	דגניים	Gramineae	5	5
NZN-75	Nitzana	Tepper and Bar-Oz		2017-2020	A	129	1533-1	3	Light Fraction	1	36	חיטה/שעורה	Hordeum/Triticum	צווארון	collar	דגניים	Gramineae	3	3
NZN-75	Nitzana	Tepper and Bar-Oz		2017-2020	A	129	1533-1	3	Light Fraction	1	37			שרשי דגן	roots	דגניים	Gramineae	3	3
NZN-75	Nitzana	Tepper and Bar-Oz		2017-2020	A	129	1533-1	3	Light Fraction	1	38			פרקי גבעול	culm nodes	דגניים	Gramineae	17	17
NZN-75	Nitzana	Tepper and Bar-Oz		2017-2020	A	129	1533-1	3	Light Fraction	1	39	שעורה	Hordeum sp.	גרגיר	grain	דגניים	Gramineae	1	1
NZN-75	Nitzana	Tepper and Bar-Oz		2017-2020	A	129	1533-1	3	Light Fraction	1	40	שעורה??	Hordeum sp.??	פרח עקר	infertile floret	דגניים	Gramineae	7	7
NZN-75	Nitzana	Tepper and Bar-Oz		2017-2020	A	129	1533-1	3	Light Fraction	1	41	זון אשון/רבשנתי?		גרגיר	grain	דגניים	Gramineae	8	8
NZN-75	Nitzana	Tepper and Bar-Oz		2017-2020	A	129	1533-1	3	Light Fraction	1	42	זון משכר?		גרגיר	grain	דגניים	Gramineae	1	1
NZN-75	Nitzana	Tepper and Bar-Oz		2017-2020	A	129	1533-1	3	Light Fraction	1	43	דגני להגדרה		גרגיר	grain	דגניים	Gramineae	1	1
NZN-75	Nitzana	Tepper and Bar-Oz		2017-2020	A	129	1533-1	3	Light Fraction	1	44	דגני		גרגיר	grain	דגניים	Gramineae	5	5
NZN-75	Nitzana	Tepper and Bar-Oz		2017-2020	A	129	1533-1	3	Light Fraction	1	45			שברי מלען	awn fragments	דגניים	Gramineae
NZN-75	Nitzana	Tepper and Bar-Oz		2017-2020	A	129	1533-1	3	Light Fraction	1	46	גרגרנית ערבית		זרע	seed	פרפרניים	Fabaceae	6	6	לבדוק
NZN-75	Nitzana	Tepper and Bar-Oz		2017-2020	A	129	1533-1	3	Light Fraction	1	47	תלתן/גרגרנית		זרע	seed	פרפרניים	Fabaceae	2	2
NZN-75	Nitzana	Tepper and Bar-Oz		2017-2020	A	129	1533-1	3	Light Fraction	1	48	פרפרני להגדרה		זרע	seed	פרפרניים	Fabaceae	1	1
NZN-75	Nitzana	Tepper and Bar-Oz		2017-2020	A	129	1533-1	3	Light Fraction	1	49	אספסת?		זרע	seed	פרפרניים	Fabaceae	1	1
NZN-75	Nitzana	Tepper and Bar-Oz		2017-2020	A	129	1533-1	3	Light Fraction	1	50	פרסת הסוס	Hippocrepis unisiliquosa	זרע	seed	פרפרניים	Fabaceae	2	2
NZN-75	Nitzana	Tepper and Bar-Oz		2017-2020	A	129	1533-1	3	Light Fraction	1	51	פרפרני קטן		זרע	seed	פרפרניים	Fabaceae	21	21	יותר ממין אחד אך השתמרות גרועה
NZN-75	Nitzana	Tepper and Bar-Oz		2017-2020	A	129	1533-1	3	Light Fraction	1	52	בקיי	Vicieae	זרע	cotyledon	פרפרניים	Fabaceae	1	1
NZN-75	Nitzana	Tepper and Bar-Oz		2017-2020	A	129	1533-1	3	Light Fraction	1	53	פיקוס התאנה	Ficus carica	אגוזית	nutlet			8	8
NZN-75	Nitzana	Tepper and Bar-Oz		2017-2020	A	129	1533-1	3	Light Fraction	1	54	מתנן שעיר	Thymelaea hirsuta	אגוזית	nutlet	מתנניים	Thymelaceae	1	1
NZN-75	Nitzana	Tepper and Bar-Oz		2017-2020	A	129	1533-1	3	Light Fraction	1	55	מתנן שעיר	Thymelaea hirsuta	עלה	leaf	מתנניים	Thymelaceae	440	440	אחד עם 3 עלים נספר כאחד
NZN-75	Nitzana	Tepper and Bar-Oz		2017-2020	A	129	1533-1	3	Light Fraction	1	56	חלמית קטנת-פרחים/חדת-אונות	Malva parviflora/oxyloba	זרע	seed	חלמיתיים	Malvaceae	1	1
NZN-75	Nitzana	Tepper and Bar-Oz		2017-2020	A	129	1533-1	3	Light Fraction	1	57	ארנבית שרועה	Arnebia decumbrens	זרע	seed	זיפניים	Boraginaceae	1	1
NZN-75	Nitzana	Tepper and Bar-Oz		2017-2020	A	129	1533-1	3	Light Fraction	1	58	בר-עכנאי שיחני	Echiochilon fruticosum	זרע	seed	זיפניים	Boraginaceae	5	5
NZN-75	Nitzana	Tepper and Bar-Oz		2017-2020	A	129	1533-1	3	Light Fraction	1	59	עשנן	Fumaria sp.	אגוזית	nutlet	עשנניים	Fumariaceae
NZN-75	Nitzana	Tepper and Bar-Oz		2017-2020	A	129	1533-1	3	Light Fraction	1	60	דבקה	Galium sp.	זרע	seed	פואתיים	Rubiaceae	1	1
NZN-75	Nitzana	Tepper and Bar-Oz		2017-2020	A	129	1533-1	3	Light Fraction	1	61	אשליל	Reaumuria sp.	ניצן של ענף	bud	אשליים	Tamaricaceae	1	1
NZN-75	Nitzana	Tepper and Bar-Oz		2017-2020	A	129	1533-1	3	Light Fraction	1	62	מצעית מורכבים		מצעית	receptacle	מורכבים	Asteraceae	3	3	להגדרה
NZN-75	Nitzana	Tepper and Bar-Oz		2017-2020	A	129	1533-1	3	Light Fraction	1	63	ארכוביתי?						1	1	לחבר לעיל
NZN-75	Nitzana	Tepper and Bar-Oz		2017-2020	A	129	1533-1	3	Light Fraction	1	64	דרדרים. קורטם?				מורכבים	Asteraceae	1	1
NZN-75	Nitzana	Tepper and Bar-Oz		2017-2020	A	129	1533-1	3	Light Fraction	1	65	בלתי						1	1	רצנטי? גביע צינורי, 6 עלי כותרת, הרבה אבקנים וצלקות. כמו מיקרו-רימון
NZN-75	Nitzana	Tepper and Bar-Oz		2017-2020	A	129	1533-1	3	Light Fraction	1	66	לחבר בהמשך						3	3	יואל ראה בזה פוטנציאל
NZN-75	Nitzana	Tepper and Bar-Oz		2017-2020	A	129	1533-1	3	Light Fraction	1	67	בלתי-שונות								יואל לא ראה בזה פוטנציאל
NZN-75	Nitzana	Tepper and Bar-Oz		2017-2020	A	129	1533-1	3	Light Fraction	1	68	בלתי-שונות								לא הבאתי ליואל
NZN-75	Nitzana	Tepper and Bar-Oz		2017-2020	A	129	1533-1	3	Light Fraction	1	69	זרע בגלל?						3	3
NZN-75	Nitzana	Tepper and Bar-Oz		2017-2020	A	129	1533-1	3	Light Fraction	1	70	גלל		שברי גלל
NZN-75	Nitzana	Tepper and Bar-Oz		2017-2020	A	129	1533-1	3	Light Fraction	1	71	חרק
NZN-75	Nitzana	Tepper and Bar-Oz		2017-2020	A	129	1533-1	3	Light Fraction	1	72	עוקץ - בלתי						1	1	מזכיר עוקץ גפן אבל לא נראה לי זה
NZN-76	Nitzana	Tepper and Bar-Oz		2017-2020	A	129	1533-1	3	Heavy Residue	2	1	שעורה	Hordeum	גרגיר	grain	דגניים	Gramineae	2	2	לאפיין
NZN-76	Nitzana	Tepper and Bar-Oz		2017-2020	A	129	1533-1	3	Heavy Residue	2	2	חיטה/שעורה	Hordeum/Triticum	שבר גרגיר	seed fragment	דגניים	Gramineae	1	1
NZN-76	Nitzana	Tepper and Bar-Oz		2017-2020	A	129	1533-1	3	Heavy Residue	2	3	עדשה	Lens culinaris	זרע	seed	פרפרניים	Fabaceae	1	1
NZN-76	Nitzana	Tepper and Bar-Oz		2017-2020	A	129	1533-1	3	Heavy Residue	2	4	זית	Olea europaea	שבר	fragment	זיתיים	Oleaceae	1	1
NZN-76	Nitzana	Tepper and Bar-Oz		2017-2020	A	129	1533-1	3	Heavy Residue	2	5	טופח ירושלים	Lathyrus hierosolymitanus	זרע	seed	פרפרניים	Fabaceae	1	1	הגדרה לפי צורה ודגם
NZN-76	Nitzana	Tepper and Bar-Oz		2017-2020	A	129	1533-1	3	Heavy Residue	2	6	בלתי-שונות
NZN-76	Nitzana	Tepper and Bar-Oz		2017-2020	A	129	1533-1	3	Heavy Residue	2	7	גללים
NZN-77	Nitzana	Tepper and Bar-Oz		2017-2020	A	131	1579-2	3	Light Fraction	2	1	שעורה	Hordeum	גרגיר	grain	דגניים	Gramineae	17	17	MNI=21 with fragments
NZN-77	Nitzana	Tepper and Bar-Oz		2017-2020	A	131	1579-2	3	Light Fraction	2	2	חיטה/שעורה	Hordeum/Triticum	שבר גרגיר	seed fragment	דגניים	Gramineae	5	5	MNI=2 with fragments	לבדוק שוב, יעל
NZN-77	Nitzana	Tepper and Bar-Oz		2017-2020	A	131	1579-2	3	Light Fraction	2	3	גפן	Vitis vinifera	חרצן	pip	גפניים	Vitaceae	2	2
NZN-77	Nitzana	Tepper and Bar-Oz		2017-2020	A	131	1579-2	3	Light Fraction	2	4			פרקי גבעול	culm nodes	דגניים	Gramineae	16	16	כולל 3 שורשים
NZN-77	Nitzana	Tepper and Bar-Oz		2017-2020	A	131	1579-2	3	Light Fraction	2	5	בקיי	Vicieae	זרע	seed	פרפרניים	Fabaceae	1	1	?לחבר בהמשך
NZN-77	Nitzana	Tepper and Bar-Oz		2017-2020	A	131	1579-2	3	Light Fraction	2	6	קטנית		זרע	seed	פרפרניים	Fabaceae	1	1	לנסות להגדיר
NZN-77	Nitzana	Tepper and Bar-Oz		2017-2020	A	131	1579-2	3	Light Fraction	2	7	עדשה?		זרע	seed	פרפרניים	Fabaceae	3	3	עדשה?	עדשתי אך קצת רחב וגדול מהרגיל
NZN-77	Nitzana	Tepper and Bar-Oz		2017-2020	A	131	1579-2	3	Light Fraction	2	8	ציפרני החתול		זרע	seed	מורכבים	Asteraceae	1	1
NZN-77	Nitzana	Tepper and Bar-Oz		2017-2020	A	131	1579-2	3	Light Fraction	2	9	בלתי		ציפה עם זרע?
NZN-77	Nitzana	Tepper and Bar-Oz		2017-2020	A	131	1579-2	3	Light Fraction	2	10	בקיי?	Vicieae?	זרע	seed	פרפרניים	Fabaceae	2	2
NZN-77	Nitzana	Tepper and Bar-Oz		2017-2020	A	131	1579-2	3	Light Fraction	2	11	גללים
NZN-77	Nitzana	Tepper and Bar-Oz		2017-2020	A	131	1579-2	3	Light Fraction	1	12	גללים?
NZN-77	Nitzana	Tepper and Bar-Oz		2017-2020	A	131	1579-2	3	Light Fraction	1	13	גפן	Vitis vinifera	אנדוספרם	endosperm	גפניים	Vitaceae	2	2
NZN-77	Nitzana	Tepper and Bar-Oz		2017-2020	A	131	1579-2	3	Light Fraction	1	14	גפן	Vitis vinifera	עוקץ	pedicel	גפניים	Vitaceae	2	2
NZN-77	Nitzana	Tepper and Bar-Oz		2017-2020	A	131	1579-2	3	Light Fraction	1	15	שעורה שש-טורית	Hordeum vulgare subsp. hexastichum	פרק ציר שיבולת	rachis fragments	דגניים	Gramineae	11	11	2 pieces with 2 segments
NZN-77	Nitzana	Tepper and Bar-Oz		2017-2020	A	131	1579-2	3	Light Fraction	1	16	שעורה דו-טורית/התבור	Hordeum vulgare subsp. distichum/spontaneum	פרק ציר שיבולת	rachis fragments	דגניים	Gramineae	5	5
NZN-77	Nitzana	Tepper and Bar-Oz		2017-2020	A	131	1579-2	3	Light Fraction	1	17	שעורה	Hordeum vulgare	פרק ציר שיבולת	rachis fragments	דגניים	Gramineae	15	15	1 piece with 2 segments
NZN-77	Nitzana	Tepper and Bar-Oz		2017-2020	A	131	1579-2	3	Light Fraction	1	18	שעורה	Hordeum vulgare	צווארון בסיס ציר שיבולת	collar and basal rachis segment	דגניים	Gramineae	1	1
NZN-77	Nitzana	Tepper and Bar-Oz		2017-2020	A	131	1579-2	3	Light Fraction	1	19	חיטה טטרפלוידית	Triticum turgidum s.l.	פרק ציר שיבולת	rachis fragments	דגניים	Gramineae	7	7
NZN-77	Nitzana	Tepper and Bar-Oz		2017-2020	A	131	1579-2	3	Light Fraction	1	20	חיטת הלחם	Triticum aestivum s.l.	פרק ציר שיבולת	rachis fragments	דגניים	Gramineae	1	1
NZN-77	Nitzana	Tepper and Bar-Oz		2017-2020	A	131	1579-2	3	Light Fraction	1	21	חיטה?	cf. Triticum	צווארון בסיס ציר שיבולת	collar and basal rachis segment	דגניים	Gramineae	1	1
NZN-77	Nitzana	Tepper and Bar-Oz		2017-2020	A	131	1579-2	3	Light Fraction	1	22	חיטה/שעורה	Hordeum/Triticum	פרק ציר שיבולת	rachis fragments	דגניים	Gramineae	10	10	כנראה הכל שעורה
NZN-77	Nitzana	Tepper and Bar-Oz		2017-2020	A	131	1579-2	3	Light Fraction	1	23	חיטה/שעורה	Hordeum/Triticum	בסיס ציר שיבולת	basal rachis segment	דגניים	Gramineae	1	1
NZN-77	Nitzana	Tepper and Bar-Oz		2017-2020	A	131	1579-2	3	Light Fraction	1	24	שעורה	Hordeum sp.	גרגיר	grain	דגניים	Gramineae	3	3
NZN-77	Nitzana	Tepper and Bar-Oz		2017-2020	A	131	1579-2	3	Light Fraction	1	25	זון אשון/רבשנתי?		גרגיר	grain	דגניים	Gramineae	2	2
NZN-77	Nitzana	Tepper and Bar-Oz		2017-2020	A	131	1579-2	3	Light Fraction	1	26	cf. זון אשון/רבשנתי??		גרגיר	grain	דגניים	Gramineae	2	2
NZN-77	Nitzana	Tepper and Bar-Oz		2017-2020	A	131	1579-2	3	Light Fraction	1	27	דגני		עובר	grain	דגניים	Gramineae	3	3
NZN-77	Nitzana	Tepper and Bar-Oz		2017-2020	A	131	1579-2	3	Light Fraction	1	28			פרקי גבעול	culm nodes	דגניים	Gramineae	9	9
NZN-77	Nitzana	Tepper and Bar-Oz		2017-2020	A	131	1579-2	3	Light Fraction	1	29			שברי מלען	awn fragments	דגניים	Gramineae
NZN-77	Nitzana	Tepper and Bar-Oz		2017-2020	A	131	1579-2	3	Light Fraction	1	30	גרגרנית ערבית		זרע	seed	פרפרניים	Fabaceae	4	4
NZN-77	Nitzana	Tepper and Bar-Oz		2017-2020	A	131	1579-2	3	Light Fraction	1	31	מתנן שעיר	Thymelaea hirsuta	אגוזית	nutlet	מתנניים	Thymelaceae	1	1
NZN-77	Nitzana	Tepper and Bar-Oz		2017-2020	A	131	1579-2	3	Light Fraction	1	32	מתנן שעיר	Thymelaea hirsuta	עלה	leaf	מתנניים	Thymelaceae	3	3
NZN-77	Nitzana	Tepper and Bar-Oz		2017-2020	A	131	1579-2	3	Light Fraction	1	33	חלמית?	Malva sp.?	זרע	seed	חלמיתיים	Malvaceae	1	1
NZN-77	Nitzana	Tepper and Bar-Oz		2017-2020	A	131	1579-2	3	Light Fraction	1	34	פיקוס התאנה	Ficus carica					1	1
NZN-77	Nitzana	Tepper and Bar-Oz		2017-2020	A	131	1579-2	3	Light Fraction	1	35	תלתן/גרגרנית/שברק		זרע	seed	פרפרניים	Fabaceae	1	1
NZN-77	Nitzana	Tepper and Bar-Oz		2017-2020	A	131	1579-2	3	Light Fraction	1	36	שבר לבן	Peganum harmala	זרע	seed	זוגניים	Zygophyllaceae	1	1
NZN-77	Nitzana	Tepper and Bar-Oz		2017-2020	A	131	1579-2	3	Light Fraction	1	37	בלתי						2	2	עוקץ גפן?
NZN-77	Nitzana	Tepper and Bar-Oz		2017-2020	A	131	1579-2	3	Light Fraction	1	38	בלתי -להגדרה בהמשך						1	1
NZN-77	Nitzana	Tepper and Bar-Oz		2017-2020	A	131	1579-2	3	Light Fraction	1	39	בלתי -להגדרה בהמשך						1	1
NZN-77	Nitzana	Tepper and Bar-Oz		2017-2020	A	131	1579-2	3	Light Fraction	1	40	בלתי-שונות
NZN-77	Nitzana	Tepper and Bar-Oz		2017-2020	A	131	1579-2	3	Light Fraction	1	41	גלל
NZN-78	Nitzana	Tepper and Bar-Oz		2017-2020	A	131	1579-2	3	Heavy Residue	2	1	שעורה	Hordeum	גרגיר	grain	דגניים	Gramineae	2	2
NZN-78	Nitzana	Tepper and Bar-Oz		2017-2020	A	131	1579-2	3	Heavy Residue	2	2	חיטה/שעורה	Hordeum/Triticum	שבר גרגיר	seed fragment	דגניים	Gramineae	1	1
NZN-78	Nitzana	Tepper and Bar-Oz		2017-2020	A	131	1579-2	3	Heavy Residue	2	3	גפן	Vitis vinifera	חרצן	pip	גפניים	Vitaceae	1	1
NZN-78	Nitzana	Tepper and Bar-Oz		2017-2020	A	131	1579-2	3	Heavy Residue	2	4	עדשה	Lens culinaris	זרע	seed	פרפרניים	Fabaceae	1	1	עוד שבר לא ברור
NZN-78	Nitzana	Tepper and Bar-Oz		2017-2020	A	131	1579-2	3	Heavy Residue	2	5	בלתי
NZN-78	Nitzana	Tepper and Bar-Oz		2017-2020	A	131	1579-2	3	Heavy Residue	2	6	תמר?	Phoenix dactylifera	שבר זרע	seed fragment	דקליים?	Palmae?
NZN-78	Nitzana	Tepper and Bar-Oz		2017-2020	A	131	1579-2	3	Heavy Residue	2	7	בלתי-שונות
NZN-78	Nitzana	Tepper and Bar-Oz		2017-2020	A	131	1579-2	3	Heavy Residue	2	8	גללים
NZN-79	Nitzana	Tepper and Bar-Oz		2017-2020	A	131	1582-3	3	Light Fraction	2	1	שעורה	Hordeum	גרגיר	grain	דגניים	Gramineae	32	32	MNI=33 with fragments
NZN-79	Nitzana	Tepper and Bar-Oz		2017-2020	A	131	1582-3	3	Light Fraction	2	2	חיטה/שעורה	Hordeum/Triticum	שבר גרגיר	seed fragment	דגניים	Gramineae	2	2	נראה שעורה אך אולי יש זון ואחרים
NZN-79	Nitzana	Tepper and Bar-Oz		2017-2020	A	131	1582-3	3	Light Fraction	2	3	גפן	Vitis vinifera	חרצן	pip	גפניים	Vitaceae	3	3
NZN-79	Nitzana	Tepper and Bar-Oz		2017-2020	A	131	1582-3	3	Light Fraction	2	4	חיטה/שעורה	Hordeum/Triticum	צווארון ובסיס ציר שיבולת	collar and first rachis	דגניים	Gramineae	1	1
NZN-79	Nitzana	Tepper and Bar-Oz		2017-2020	A	131	1582-3	3	Light Fraction	2	5	גפן	Vitis vinifera	עוקץ	pedicel	גפניים	Vitaceae	1	1
NZN-79	Nitzana	Tepper and Bar-Oz		2017-2020	A	131	1582-3	3	Light Fraction	2	6			שורשי דגן	roots	דגניים	Gramineae	3	3
NZN-79	Nitzana	Tepper and Bar-Oz		2017-2020	A	131	1582-3	3	Light Fraction	2	7			פרקי גבעול	culm nodes	דגניים	Gramineae	10	10
NZN-79	Nitzana	Tepper and Bar-Oz		2017-2020	A	131	1582-3	3	Light Fraction	2	8	בקיית הכרשינה	Vicia ervilia	זרע	seed	פרפרניים	Fabaceae	1	1
NZN-79	Nitzana	Tepper and Bar-Oz		2017-2020	A	131	1582-3	3	Light Fraction	2	9	שקד מצוי	Prunus amygdalus	קליפה		ורדיים	Rosaceae	1	1
NZN-79	Nitzana	Tepper and Bar-Oz		2017-2020	A	131	1582-3	3	Light Fraction	2	10	תמר?	cf. Phoenix dactylifera	שבר גלעין	stone fragment	דקליים	Palmae	1	1	השווה 79-6
NZN-79	Nitzana	Tepper and Bar-Oz		2017-2020	A	131	1582-3	3	Light Fraction	2	11	בלתי-שונות
NZN-79	Nitzana	Tepper and Bar-Oz		2017-2020	A	131	1582-3	3	Light Fraction	2	12	גללים
NZN-79	Nitzana	Tepper and Bar-Oz		2017-2020	A	131	1582-3	3	Light Fraction	2	13	גפן	Vitis vinifera	חרצן	pip	גפניים	Vitaceae	2	2
NZN-79	Nitzana	Tepper and Bar-Oz		2017-2020	A	131	1582-3	3	Light Fraction	1	14	גפן	Vitis vinifera	עוקץ	pedicel	גפניים	Vitaceae	1	1
NZN-79	Nitzana	Tepper and Bar-Oz		2017-2020	A	131	1582-3	3	Light Fraction	1	15	שעורה שש-טורית	Hordeum vulgare subsp. hexastichum	פרק ציר שיבולת	rachis fragments	דגניים	Gramineae	23	23
NZN-79	Nitzana	Tepper and Bar-Oz		2017-2020	A	131	1582-3	3	Light Fraction	1	16	שעורה שש-טורית	Hordeum vulgare subsp. hexastichum	צווארון בסיס ציר שיבולת	collar and basal rachis segment	דגניים	Gramineae	1	1
NZN-79	Nitzana	Tepper and Bar-Oz		2017-2020	A	131	1582-3	3	Light Fraction	1	17	שעורה דו-טורית/התבור	Hordeum vulgare subsp. distichum/spontaneum	פרק ציר שיבולת	rachis fragments	דגניים	Gramineae	8	8
NZN-79	Nitzana	Tepper and Bar-Oz		2017-2020	A	131	1582-3	3	Light Fraction	1	18	שעורה	Hordeum vulgare	פרק ציר שיבולת	rachis fragments	דגניים	Gramineae	24	24
NZN-79	Nitzana	Tepper and Bar-Oz		2017-2020	A	131	1582-3	3	Light Fraction	1	19	שעורה	Hordeum vulgare	פרק ציר שיבולת עם גלל	rachis fragment with dung matrix	דגניים	Gramineae	3	3
NZN-79	Nitzana	Tepper and Bar-Oz		2017-2020	A	131	1582-3	3	Light Fraction	1	20	חיטה טטרפלוידית	Triticum turgidum s.l.	פרק ציר שיבולת	rachis fragments	דגניים	Gramineae	9	9
NZN-79	Nitzana	Tepper and Bar-Oz		2017-2020	A	131	1582-3	3	Light Fraction	1	21	חיטה/שעורה	Hordeum/Triticum	פרק ציר שיבולת	rachis fragments	דגניים	Gramineae	11	11
NZN-79	Nitzana	Tepper and Bar-Oz		2017-2020	A	131	1582-3	3	Light Fraction	1	22	חיטה/שעורה	Hordeum/Triticum	בסיס ציר שיבולת	basal rachis segment	דגניים	Gramineae	1	1
NZN-79	Nitzana	Tepper and Bar-Oz		2017-2020	A	131	1582-3	3	Light Fraction	1	23	שיבולת שועל?				דגניים	Gramineae	1	1
NZN-79	Nitzana	Tepper and Bar-Oz		2017-2020	A	131	1582-3	3	Light Fraction	1	24			שורשי דגן	roots	דגניים	Gramineae	1	1
NZN-79	Nitzana	Tepper and Bar-Oz		2017-2020	A	131	1582-3	3	Light Fraction	1	25			פרקי גבעול	culm nodes	דגניים	Gramineae	25	25
NZN-79	Nitzana	Tepper and Bar-Oz		2017-2020	A	131	1582-3	3	Light Fraction	1	26	שעורה	Hordeum	גרגיר	grain	דגניים	Gramineae	9	9
NZN-79	Nitzana	Tepper and Bar-Oz		2017-2020	A	131	1582-3	3	Light Fraction	1	27	זון אשון/רבשנתי?		גרגיר	grain	דגניים	Gramineae	3	3
NZN-79	Nitzana	Tepper and Bar-Oz		2017-2020	A	131	1582-3	3	Light Fraction	1	28	cf. זון ??		גרגיר	grain	דגניים	Gramineae	1	1
NZN-79	Nitzana	Tepper and Bar-Oz		2017-2020	A	131	1582-3	3	Light Fraction	1	29	עוקצר?		גרגיר	grain	דגניים	Gramineae	3	3
NZN-79	Nitzana	Tepper and Bar-Oz		2017-2020	A	131	1582-3	3	Light Fraction	1	30	דגני		גרגיר	grain	דגניים	Gramineae	8	8
NZN-79	Nitzana	Tepper and Bar-Oz		2017-2020	A	131	1582-3	3	Light Fraction	1	31	גרגרנית ערבית						5	5
NZN-79	Nitzana	Tepper and Bar-Oz		2017-2020	A	131	1582-3	3	Light Fraction	1	32	גרגרנית/תלתן						2	2
NZN-79	Nitzana	Tepper and Bar-Oz		2017-2020	A	131	1582-3	3	Light Fraction	1	33	פרפרני?						2	2	בקיים כנראה
NZN-79	Nitzana	Tepper and Bar-Oz		2017-2020	A	131	1582-3	3	Light Fraction	1	34	רשתון?
NZN-79	Nitzana	Tepper and Bar-Oz		2017-2020	A	131	1582-3	3	Light Fraction	1	35	פיקוס התאנה	Ficus carica	אגוזית	nutlet	תותיים	Moraceae	1	1
NZN-79	Nitzana	Tepper and Bar-Oz		2017-2020	A	131	1582-3	3	Light Fraction	1	36	ארנבית שרועה	Arnebia decumbrens	זרע	seed	זיפניים	Boraginaceae	2	2
NZN-79	Nitzana	Tepper and Bar-Oz		2017-2020	A	131	1582-3	3	Light Fraction	1	37	בר-עכנאי שיחני	Echiochilon fruticosum	זרע	seed	זיפניים	Boraginaceae	1	1
NZN-79	Nitzana	Tepper and Bar-Oz		2017-2020	A	131	1582-3	3	Light Fraction	1	38	חלמית מצרית?
NZN-79	Nitzana	Tepper and Bar-Oz		2017-2020	A	131	1582-3	3	Light Fraction	1	39	מתנן שעיר?
NZN-79	Nitzana	Tepper and Bar-Oz		2017-2020	A	131	1582-3	3	Light Fraction	1	40	בן-שלח מנוצה		מקור		מצליבים	Brassicaceae	3	3
NZN-79	Nitzana	Tepper and Bar-Oz		2017-2020	A	131	1582-3	3	Light Fraction	1	41	מצליב				מצליבים	Brassicaceae	1	1
NZN-79	Nitzana	Tepper and Bar-Oz		2017-2020	A	131	1582-3	3	Light Fraction	1	42	בטנונית שעירה	Gastrocotyle hispida	קליפת זרע	seed coat fragment	זיפניים	Boraginaceae	1	1
NZN-79	Nitzana	Tepper and Bar-Oz		2017-2020	A	131	1582-3	3	Light Fraction	1	43	cf. זון	cf. Lolium	מפרק?	rachis fragment?	דגניים?	Gramineae?
NZN-79	Nitzana	Tepper and Bar-Oz		2017-2020	A	131	1582-3	3	Light Fraction	1	44	בלתי-שונות
NZN-79	Nitzana	Tepper and Bar-Oz		2017-2020	A	131	1582-3	3	Light Fraction	1	45	רצנטי
NZN-79	Nitzana	Tepper and Bar-Oz		2017-2020	A	131	1582-3	3	Light Fraction	1	46	גלל		שברים
NZN-80	Nitzana	Tepper and Bar-Oz		2017-2020	A	131	1582-3	3	Heavy Residue	2	1	שעורה	Hordeum	גרגיר	grain	דגניים	Gramineae	6	6
NZN-80	Nitzana	Tepper and Bar-Oz		2017-2020	A	131	1582-3	3	Heavy Residue	2	2	חיטה/שעורה	Hordeum/Triticum	שבר גרגיר	seed fragment	דגניים	Gramineae	2	2	ועוד שבר
NZN-80	Nitzana	Tepper and Bar-Oz		2017-2020	A	131	1582-3	3	Heavy Residue	2	3	עדשה	Lens culinaris	זרע	seed	פרפרניים	Fabaceae	2	2	MNI is 5 or 6 with fragments
NZN-80	Nitzana	Tepper and Bar-Oz		2017-2020	A	131	1582-3	3	Heavy Residue	2	4	זית/תמר/אפרסק		שבר גלעין	stone fragment					לבדוק
NZN-80	Nitzana	Tepper and Bar-Oz		2017-2020	A	131	1582-3	3	Heavy Residue	2	5	בלתי-שונות
NZN-80	Nitzana	Tepper and Bar-Oz		2017-2020	A	131	1582-3	3	Heavy Residue	2	6	גללים
NZN-80	Nitzana	Tepper and Bar-Oz		2017-2020	A	131	1582-3	3	Heavy Residue	2	7	סיד?
NZN-172	Nitzana	Tepper and Bar-Oz		2017-2020	A	102	1072-1		Dry Sift	2	1	חיטה/שעורה	Hordeum/Triticum	גרגיר	grain	דגניים	Gramineae	3	3
NZN-172	Nitzana	Tepper and Bar-Oz		2017-2020	A	102	1072-1		Dry Sift	2	2	שעורה	Hordeum	גרגיר	grain	דגניים	Gramineae	2	2
NZN-172	Nitzana	Tepper and Bar-Oz		2017-2020	A	102	1072-1		Dry Sift	2	3	חיטה	Triticum	גרגיר	grain	דגניים	Gramineae	6	6
NZN-172	Nitzana	Tepper and Bar-Oz		2017-2020	A	102	1072-1		Dry Sift	2	4	גפן	Vitis vinifera	עוקץ	pedicel	גפניים	Vitaceae	2	2
NZN-172	Nitzana	Tepper and Bar-Oz		2017-2020	A	102	1072-1		Dry Sift	2	5	גפן	Vitis vinifera	זג	grapeskin	גפניים	Vitaceae	5	5
NZN-172	Nitzana	Tepper and Bar-Oz		2017-2020	A	102	1072-1		Dry Sift	2	6	גפן	Vitis vinifera	חרצן		גפניים	Vitaceae	10	10
NZN-172	Nitzana	Tepper and Bar-Oz		2017-2020	A	102	1072-1		Dry Sift	2	7	אמיך קוצני	Emex spinosa	זרע?				1	1
NZN-172	Nitzana	Tepper and Bar-Oz		2017-2020	A	102	1072-1		Dry Sift	2	8	בקיית הכרשינה	cf. Vicia ervilia	זרע?				1	1
NZN-172	Nitzana	Tepper and Bar-Oz		2017-2020	A	102	1072-1		Dry Sift	2	9	זון משכר/ חיטה/ שעורה				דגניים	Gramineae	1	1
NZN-172	Nitzana	Tepper and Bar-Oz		2017-2020	A	102	1072-1		Dry Sift	2	10	חיטה טטרפלוידית	Triticum turgidum s.l.		rachis	דגניים	Gramineae	1	1
NZN-172	Nitzana	Tepper and Bar-Oz		2017-2020	A	102	1072-1		Dry Sift	2	11	דגני			roots	דגניים	Gramineae	3	3
NZN-172	Nitzana	Tepper and Bar-Oz		2017-2020	A	102	1072-1		Dry Sift	2	12				culm nodes			12	12
NZN-172	Nitzana	Tepper and Bar-Oz		2017-2020	A	102	1072-1		Dry Sift	2	13	חציל	cf. Solanum melongena		זרע	סולניים		9	9
NZN-172	Nitzana	Tepper and Bar-Oz		2017-2020	A	102	1072-1		Dry Sift	2	14	זרדים						7	7
NZN-172	Nitzana	Tepper and Bar-Oz		2017-2020	A	102	1072-1		Dry Sift	2	15	בלתי
NZN-172	Nitzana	Tepper and Bar-Oz		2017-2020	A	102	1072-1		Dry Sift	2	16	גלל						15	15
NZN-172	Nitzana	Tepper and Bar-Oz		2017-2020	A	102	1072-1		Dry Sift	2	17	בלתי
NZN-172	Nitzana	Tepper and Bar-Oz		2017-2020	A	102	1072-1		Dry Sift	2	18	גלל - שברים
NZN-172	Nitzana	Tepper and Bar-Oz		2017-2020	A	102	1072-1		Dry Sift	2	19
NZN-172	Nitzana	Tepper and Bar-Oz		2017-2020	A	102	1072-1		Dry Sift	2	20
NZN-172	Nitzana	Tepper and Bar-Oz		2017-2020	A	102	1072-1		Dry Sift	2	21
NZN-172	Nitzana	Tepper and Bar-Oz		2017-2020	A	102	1072-1		Dry Sift	2	22
NZN-172	Nitzana	Tepper and Bar-Oz		2017-2020	A	102	1072-1		Dry Sift	2	23
NZN-172	Nitzana	Tepper and Bar-Oz		2017-2020	A	102	1072-1		Dry Sift	2	24
NZN-172	Nitzana	Tepper and Bar-Oz		2017-2020	A	102	1072-1		Dry Sift	2	25
NZN-172	Nitzana	Tepper and Bar-Oz		2017-2020	A	102	1072-1		Dry Sift	2	26
NZN-172	Nitzana	Tepper and Bar-Oz		2017-2020	A	102	1072-1		Dry Sift	2	27
NZN-172	Nitzana	Tepper and Bar-Oz		2017-2020	A	102	1072-1		Dry Sift	2	28
NZN-172	Nitzana	Tepper and Bar-Oz		2017-2020	A	102	1072-1		Dry Sift	2	29
NZN-172	Nitzana	Tepper and Bar-Oz		2017-2020	A	102	1072-1		Dry Sift	2	30
NZN-172	Nitzana	Tepper and Bar-Oz		2017-2020	A	102	1072-1		Dry Sift	2	31

## Sheet: שטח B
Lab #	Site	Excavator	Archaeobotanist	Year analyzed	Area	Locus	Basket	Sediment Volume (liter)	Flotation (Light/Heavy/Dry Sift)	Fraction size (mm)	Group	Vial no.	מין הצמח	Plant Latin name	איבר	Organ	משפחה	Family	Quantity	Notes
NZN-81	Nitzana	Tepper and Bar-Oz	דניאל	2017-2020	B	209	2037-4	3	Light Fraction	2	1	1	שעורה	Hordeum	גרגיר	grain	דגניים	Gramineae	2
NZN-81	Nitzana	Tepper and Bar-Oz	דניאל	2017-2020	B	209	2037-4	3	Light Fraction	2	1	2	חיטה	Triticum	גרגיר	grain	דגניים	Gramineae	3
NZN-81	Nitzana	Tepper and Bar-Oz	דניאל	2017-2020	B	209	2037-4	3	Light Fraction	2	1	3	חיטה/שעורה	Hordeum/Triticum	גרגיר	grain	דגניים	Gramineae	2
NZN-81	Nitzana	Tepper and Bar-Oz	דניאל	2017-2020	B	209	2037-4	3	Light Fraction	2	3	4	גפן	Vitis vinifera	חרצן	pip	גפניים	Vitaceae	2
NZN-81	Nitzana	Tepper and Bar-Oz	דניאל	2017-2020	B	209	2037-4	3	Light Fraction	2	1	5			פרקי גבעול	culm nodes	דגניים	Gramineae	1
NZN-81	Nitzana	Tepper and Bar-Oz	דניאל	2017-2020	B	209	2037-4	3	Light Fraction	2	7	6	בלתי-שונות
NZN-81	Nitzana	Tepper and Bar-Oz	דניאל	2017-2020	B	209	2037-4	3	Light Fraction	2		7	קינואה						2
NZN-82	Nitzana	Tepper and Bar-Oz	דניאל	2017-2020	B	209	2037-4	3	Heavy Residue	2	-	-	-	-	-	-	-	-	-	חסר כרגע
NZN-83	Nitzana	Tepper and Bar-Oz	דניאל	2017-2020	B	209	2042-1	3	Light Fraction	2	1	1	חיטה	Triticum	גרגיר	grain	דגניים	Gramineae	1
NZN-83	Nitzana	Tepper and Bar-Oz	דניאל	2017-2020	B	209	2042-1	3	Light Fraction	2	1	2			פרקי גבעול	culm nodes	דגניים	Gramineae	1
NZN-83	Nitzana	Tepper and Bar-Oz	דניאל	2017-2020	B	209	2042-1	3	Light Fraction	2	2	3	קטנית		זרע	seed	פרפרניים	Fabaceae	1
NZN-83	Nitzana	Tepper and Bar-Oz	דניאל	2017-2020	B	209	2042-1	3	Light Fraction	2	7	4	בלתי							לבדוק
NZN-84	Nitzana	Tepper and Bar-Oz	דניאל	2017-2020	B	209	2042-1	3	Heavy Residue	2	1	1	חיטה/שעורה	Hordeum/Triticum	גרגיר	grain	דגניים	Gramineae	4	מאד בלוי
NZN-84	Nitzana	Tepper and Bar-Oz	דניאל	2017-2020	B	209	2042-1	3	Heavy Residue	2	8	2	גללים?
NZN-85	Nitzana	Tepper and Bar-Oz	דניאל	2017-2020	B	209	2049-2	3	Light Fraction	2	1	1	שעורה	Hordeum	גרגיר	grain	דגניים	Gramineae	1
NZN-85	Nitzana	Tepper and Bar-Oz	דניאל	2017-2020	B	209	2049-2	3	Light Fraction	2	1	2	חיטה	Triticum	גרגיר	grain	דגניים	Gramineae	1
NZN-85	Nitzana	Tepper and Bar-Oz	דניאל	2017-2020	B	209	2049-2	3	Light Fraction	2	1	3	חיטה/שעורה	Hordeum/Triticum	גרגיר	grain	דגניים	Gramineae	1
NZN-85	Nitzana	Tepper and Bar-Oz	דניאל	2017-2020	B	209	2049-2	3	Light Fraction	2	3	4	גפן	Vitis vinifera	חרצן	pip	גפניים	Vitaceae	2
NZN-85	Nitzana	Tepper and Bar-Oz	דניאל	2017-2020	B	209	2049-2	3	Light Fraction	2	1	5			פרקי גבעול	culm nodes	דגניים	Gramineae	1
NZN-85	Nitzana	Tepper and Bar-Oz	דניאל	2017-2020	B	209	2049-2	3	Light Fraction	2	2	6	קטנית		זרע	seed	פרפרניים	Fabaceae	1
NZN-85	Nitzana	Tepper and Bar-Oz	דניאל	2017-2020	B	209	2049-2	3	Light Fraction	2		7	בלתי-שונות
NZN-86	Nitzana	Tepper and Bar-Oz	דניאל	2017-2020	B	209	2049-2	3	Heavy Residue	2	1	1	חיטה	Triticum	גרגיר	grain	דגניים	Gramineae	1
NZN-86	Nitzana	Tepper and Bar-Oz	דניאל	2017-2020	B	209	2049-2	3	Heavy Residue	2	1	2	חיטה/שעורה	Hordeum/Triticum	גרגיר	grain	דגניים	Gramineae	1
NZN-86	Nitzana	Tepper and Bar-Oz	דניאל	2017-2020	B	209	2049-2	3	Heavy Residue	2	3	3	גפן	Vitis vinifera	שבר חרצן	pip fragment	גפניים	Vitaceae
NZN-86	Nitzana	Tepper and Bar-Oz	דניאל	2017-2020	B	209	2049-2	3	Heavy Residue	2	7	4	בלתי							שווה בדיקה
NZN-87	Nitzana	Tepper and Bar-Oz	דניאל	2017-2020	B	205	2056-1	3	Light Fraction	2		1	חיטה/שעורה	Hordeum/Triticum	גרגיר	grain	דגניים	Gramineae	1
NZN-87	Nitzana	Tepper and Bar-Oz	דניאל	2017-2020	B	205	2056-1	3	Light Fraction	2		2			פרקי גבעול	culm nodes	דגניים	Gramineae	1
NZN-87	Nitzana	Tepper and Bar-Oz	דניאל	2017-2020	B	205	2056-1	3	Light Fraction	2		3	אהל מצוי	Mesembryanthemum nodiflorum	אגוזית				1	על גבי גלל
NZN-87	Nitzana	Tepper and Bar-Oz	דניאל	2017-2020	B	205	2056-1	3	Light Fraction	2		4	בלתי							אולי שברי זית, ראה NZN-89
NZN-87	Nitzana	Tepper and Bar-Oz	דניאל	2017-2020	B	205	2056-1	3	Light Fraction	2		5	בלתי		עלים
NZN-87	Nitzana	Tepper and Bar-Oz	דניאל	2017-2020	B	205	2056-1	3	Light Fraction	2		6	גללים
NZN-88	Nitzana	Tepper and Bar-Oz	דניאל	2017-2020	B	205	2056-1	3	Heavy Residue	2	-	-	-	-	-	-	-	-	-
NZN-89	Nitzana	Tepper and Bar-Oz	דניאל	2017-2020	B	211	2073-1	3	Light Fraction	2		1	גפן	Vitis vinifera	חרצן	pip	גפניים	Vitaceae	1
NZN-89	Nitzana	Tepper and Bar-Oz	דניאל	2017-2020	B	211	2073-1	3	Light Fraction	2		2	עדשה?	Lens culinaris?	זרע	seed	פרפרניים	Fabaceae	1
NZN-89	Nitzana	Tepper and Bar-Oz	דניאל	2017-2020	B	211	2073-1	3	Light Fraction	2		3	זית	Olea europaea	חצי גלעין	seed coat half	זיתיים	Oleaceae	1	לא מפוחם
NZN-89	Nitzana	Tepper and Bar-Oz	דניאל	2017-2020	B	211	2073-1	3	Light Fraction	2		4	בלתי-שונות							רצנטי
NZN-89	Nitzana	Tepper and Bar-Oz	דניאל	2017-2020	B	211	2073-1	3	Light Fraction	2		5	בלתי-שונות
NZN-89	Nitzana	Tepper and Bar-Oz	דניאל	2017-2020	B	211	2073-1	3	Light Fraction	2		6	גללים
NZN-90	Nitzana	Tepper and Bar-Oz	דניאל	2017-2020	B	211	2073-1	3	Heavy Residue	2	אין זרעים	אין זרעים	אין זרעים	אין זרעים	אין זרעים	אין זרעים	אין זרעים	אין זרעים	אין זרעים	אין זרעים
NZN-91	Nitzana	Tepper and Bar-Oz	דניאל	2017-2020	B	211	2078-1	3	Light Fraction	2		1			פרקי גבעול	culm nodes	דגניים	Gramineae	1
NZN-91	Nitzana	Tepper and Bar-Oz	דניאל	2017-2020	B	211	2078-1	3	Light Fraction	2		2	עדשה?	Lens culinaris?	זרע	seed	פרפרניים	Fabaceae	1
NZN-91	Nitzana	Tepper and Bar-Oz	דניאל	2017-2020	B	211	2078-1	3	Light Fraction	2		3	אמיך קוצני	Emex spinosa	פרי	fruit	ארכוביתיים	Polygonaceae	1	לבדוק
NZN-91	Nitzana	Tepper and Bar-Oz	דניאל	2017-2020	B	211	2078-1	3	Light Fraction	2		4	לזיהוי						1	רצנטי
NZN-91	Nitzana	Tepper and Bar-Oz	דניאל	2017-2020	B	211	2078-1	3	Light Fraction	2		5	גללים
NZN-92	Nitzana	Tepper and Bar-Oz	דניאל	2017-2020	B	211	2078-1	3	Heavy Residue	2		1	עדשה?	Lens culinaris?	זרע	seed	פרפרניים	Fabaceae		לוודא שזה לא קינואה
NZN-92	Nitzana	Tepper and Bar-Oz	דניאל	2017-2020	B	211	2078-1	3	Heavy Residue	2		2	בלתי
NZN-92	Nitzana	Tepper and Bar-Oz	דניאל	2017-2020	B	211	2078-1	3	Heavy Residue	2		3	טיח
NZN-92	Nitzana	Tepper and Bar-Oz	דניאל	2017-2020	B	211	2078-1	3	Heavy Residue	2		4	קינואה	Quinoa					3
NZN-92	Nitzana	Tepper and Bar-Oz	דניאל	2017-2020	B	211	2078-1	3	Heavy Residue	2		4	גלל						1
NZN-93	Nitzana	Tepper and Bar-Oz	דניאל	2017-2020	B	213	2087-1	3	Light Fraction	2		1	שעורה	Hordeum	גרגיר	grain	דגניים	Gramineae	2
NZN-93	Nitzana	Tepper and Bar-Oz	דניאל	2017-2020	B	213	2087-1	3	Light Fraction	2		2	שעורה?	Hordeum	מלען	awn	דגניים	Gramineae	1	להגדיר בהמשך
NZN-93	Nitzana	Tepper and Bar-Oz	דניאל	2017-2020	B	213	2087-1	3	Light Fraction	2		3	בלתי						3	להגדיר בהמשך
NZN-94	Nitzana	Tepper and Bar-Oz	דניאל	2017-2020	B	213	2087-1	3	Heavy Residue	2		1	רצנטי		זרע וכנף?					רצנטי
NZN-94	Nitzana	Tepper and Bar-Oz	דניאל	2017-2020	B	213	2087-1	3	Heavy Residue	2		2	קינואה	Quinoa
NZN-95	Nitzana	Tepper and Bar-Oz	דניאל	2017-2020	B	213	2096-2	3	Light Fraction	2		1	שעורה	Hordeum	גרגיר	grain	דגניים	Gramineae	7
NZN-95	Nitzana	Tepper and Bar-Oz	דניאל	2017-2020	B	213	2096-2	3	Light Fraction	2		2	חיטה	Triticum	גרגיר	grain	דגניים	Gramineae	3
NZN-95	Nitzana	Tepper and Bar-Oz	דניאל	2017-2020	B	213	2096-2	3	Light Fraction	2		3			פרקי גבעול	culm nodes	דגניים	Gramineae	4
NZN-95	Nitzana	Tepper and Bar-Oz	דניאל	2017-2020	B	213	2096-2	3	Light Fraction	2		4			חלקי שדרה?	rachis fragments?	דגניים	Gramineae	1
NZN-95	Nitzana	Tepper and Bar-Oz	דניאל	2017-2020	B	213	2096-2	3	Light Fraction	2		5	זחל						1
NZN-95	Nitzana	Tepper and Bar-Oz	דניאל	2017-2020	B	213	2096-2	3	Light Fraction	2		6	בלתי						1	קטנית??
NZN-95	Nitzana	Tepper and Bar-Oz	דניאל	2017-2020	B	213	2096-2	3	Light Fraction	2		7	בלתי-שונות
NZN-95	Nitzana	Tepper and Bar-Oz	דניאל	2017-2020	B	213	2096-2	3	Light Fraction	2		8	גללים
NZN-96	Nitzana	Tepper and Bar-Oz	דניאל	2017-2020	B	213	2096-2	3	Heavy Residue	2	1	1	חיטה	Triticum	גרגיר	grain	דגניים	Gramineae	1
NZN-96	Nitzana	Tepper and Bar-Oz	דניאל	2017-2020	B	213	2096-2	3	Heavy Residue	2	1	2	חיטה/שעורה	Hordeum/Triticum	גרגיר	grain	דגניים	Gramineae
NZN-96	Nitzana	Tepper and Bar-Oz	דניאל	2017-2020	B	213	2096-2	3	Heavy Residue	2	7	3	בלתי							אולי שבר של קטנית

## Sheet: שטח C
Lab #	Site	Excavator	Archaeobotanist	Year analyzed	Area	Locus	Basket	Sediment Volume (liter)	Flotation (Light/Heavy/Dry Sift)	Fraction size (mm)	Dating	Group	Vial no.	מין הצמח	Plant Latin name	איבר	Organ	משפחה	Family	Quantity	Notes
NZN-97	Nitzana	Tepper and Bar-Oz	דניאל	2017-2020	C	300	3001-7	3	Light Fraction	2		1	1	שעורה	Hordeum	גרגיר	grain	דגניים	Gramineae	3	MNI=4 with fragment
NZN-97	Nitzana	Tepper and Bar-Oz	דניאל	2017-2020	C	300	3001-7	3	Light Fraction	2		1	2	חיטה	Triticum	גרגיר	grain	דגניים	Gramineae	2	MNI=3 with fragment
NZN-97	Nitzana	Tepper and Bar-Oz	דניאל	2017-2020	C	300	3001-7	3	Light Fraction	2		1	3	חיטה/שעורה	Hordeum/Triticum	גרגיר	grain	דגניים	Gramineae	1
NZN-97	Nitzana	Tepper and Bar-Oz	דניאל	2017-2020	C	300	3001-7	3	Light Fraction	2		3	4	גפן	Vitis vinifera	חרצן	pip	גפניים	Vitaceae	1
NZN-97	Nitzana	Tepper and Bar-Oz	דניאל	2017-2020	C	300	3001-7	3	Light Fraction	2		1	5			שרשי דגן	culm roots	דגניים	Gramineae	2
NZN-97	Nitzana	Tepper and Bar-Oz	דניאל	2017-2020	C	300	3001-7	3	Light Fraction	2		2	6	קטנית		זרע	seed	פרפרניים	Fabaceae	1	בקיי מעוך
NZN-98	Nitzana	Tepper and Bar-Oz	דניאל	2017-2020	C	300	3001-7	3	Heavy Residue	2		1	1	שעורה	Hordeum	שבר גרגיר	grain fragment	דגניים	Gramineae
NZN-98	Nitzana	Tepper and Bar-Oz	דניאל	2017-2020	C	300	3001-7	3	Heavy Residue	2		1	2	חיטה/שעורה	Hordeum/Triticum	גרגיר	grain	דגניים	Gramineae	1
NZN-98	Nitzana	Tepper and Bar-Oz	דניאל	2017-2020	C	300	3001-7	3	Heavy Residue	2		3	3	גפן	Vitis vinifera	חרצן	pip	גפניים	Vitaceae	3
NZN-98	Nitzana	Tepper and Bar-Oz	דניאל	2017-2020	C	300	3001-7	3	Heavy Residue	2		7	4	בלתי
NZN-99	Nitzana	Tepper and Bar-Oz	דניאל	2017-2020	C	301	3025-2	3	Light Fraction	2		1	1	שעורה	Hordeum	גרגיר	grain	דגניים	Gramineae	13	טיפוסים שונים
NZN-99	Nitzana	Tepper and Bar-Oz	דניאל	2017-2020	C	301	3025-2	3	Light Fraction	2		1	2	חיטה	Triticum	גרגיר	grain	דגניים	Gramineae	8	טיפוסים שונים
NZN-99	Nitzana	Tepper and Bar-Oz	דניאל	2017-2020	C	301	3025-2	3	Light Fraction	2		1	3	חיטה/שעורה	Hordeum/Triticum	גרגיר	grain	דגניים	Gramineae	5	ועוד שברים
NZN-99	Nitzana	Tepper and Bar-Oz	דניאל	2017-2020	C	301	3025-2	3	Light Fraction	2		3	4	גפן	Vitis vinifera	חרצן	pip	גפניים	Vitaceae	2
NZN-99	Nitzana	Tepper and Bar-Oz	דניאל	2017-2020	C	301	3025-2	3	Light Fraction	2		1	5	חיטה טטרפלוידית	Triticum trugidum s.l.	חלקי שדרה	rachis fragments	דגניים	Gramineae	5
NZN-99	Nitzana	Tepper and Bar-Oz	דניאל	2017-2020	C	301	3025-2	3	Light Fraction	2		1	6			פרקי גבעול	culm nodes	דגניים	Gramineae	5
NZN-99	Nitzana	Tepper and Bar-Oz	דניאל	2017-2020	C	301	3025-2	3	Light Fraction	2		7	7	בלתי-שונות
NZN-100	Nitzana	Tepper and Bar-Oz	דניאל	2017-2020	C	301	3025-2	3	Heavy Residue	2		1	1	חיטה	Triticum	גרגיר	grain	דגניים	Gramineae	2	ועוד שבר
NZN-100	Nitzana	Tepper and Bar-Oz	דניאל	2017-2020	C	301	3025-2	3	Heavy Residue	2		1	2	חיטה/שעורה	Hordeum/Triticum	גרגיר	grain	דגניים	Gramineae	4
NZN-100	Nitzana	Tepper and Bar-Oz	דניאל	2017-2020	C	301	3025-2	3	Heavy Residue	2		3	3	גפן	Vitis vinifera	חרצן	pip	גפניים	Vitaceae	1
NZN-100	Nitzana	Tepper and Bar-Oz	דניאל	2017-2020	C	301	3025-2	3	Heavy Residue	2		3	4	גפן	Vitis vinifera	זג	exocarp	גפניים	Vitaceae
NZN-100	Nitzana	Tepper and Bar-Oz	דניאל	2017-2020	C	301	3025-2	3	Heavy Residue	2		2	5	עדשה	Lens culinaris	פסיג	cotyledon	פרפרניים	Fabaceae	1
NZN-100	Nitzana	Tepper and Bar-Oz	דניאל	2017-2020	C	301	3025-2	3	Heavy Residue	2		7	6	בלתי-שונות
NZN-101	Nitzana	Tepper and Bar-Oz	דניאל	2017-2020	C	303	3034-1	3	Light Fraction	2		3	1	גפן	Vitis vinifera	חרצן	pip	גפניים	Vitaceae	1
NZN-101	Nitzana	Tepper and Bar-Oz	דניאל	2017-2020	C	303	3034-1	3	Light Fraction	2		1	2	שעורה	Hordeum	צווארון ופרק ראשון	collar and first rachis fragment	דגניים	Gramineae	1	כולל 4 פרקים
NZN-101	Nitzana	Tepper and Bar-Oz	דניאל	2017-2020	C	303	3034-1	3	Light Fraction	2		7	3	חיטה/שעורה	Hordeum/Triticum		rachis internode	דגניים	Gramineae		חיטה?
NZN-101	Nitzana	Tepper and Bar-Oz	דניאל	2017-2020	C	303	3034-1	3	Light Fraction	2			4	יבלית מצויה	Cynodon dactylon	גרגיר	grain	דגניים	Gramineae	1
NZN-101	Nitzana	Tepper and Bar-Oz	דניאל	2017-2020	C	303	3034-1	3	Light Fraction	2			5	חיעד ספרדי	Aizoon hispanicum	זרע	seed	חיעדיים	Aizoaceae	1	מפוחם או רצנטי?
NZN-101	Nitzana	Tepper and Bar-Oz	דניאל	2017-2020	C	303	3034-1	3	Light Fraction	2			6	אהל מצוי	Mesembryanthemum nodiflorum	זרע	seed	חיעדיים	Aizoaceae	2	לא מפוחם
NZN-102	Nitzana	Tepper and Bar-Oz	דניאל	2017-2020	C	303	3034-1	3	Heavy Residue	2		1	1	חיטה/שעורה	Hordeum/Triticum	גרגיר	grain	דגניים	Gramineae	1
NZN-102	Nitzana	Tepper and Bar-Oz	דניאל	2017-2020	C	303	3034-1	3	Heavy Residue	2			2	אמיך קוצני	Emex spinosa	פרי	fruit	ארכוביתיים	Polygonaceae	1	לא מפוחם
NZN-103	Nitzana	Tepper and Bar-Oz	דניאל	2017-2020	C	306	3042-1	3	Light Fraction	2		3	1	גפן	Vitis vinifera	אנדוספרם	endosperm	גפניים	Vitaceae	1	לא מפוחם
NZN-103	Nitzana	Tepper and Bar-Oz	דניאל	2017-2020	C	306	3042-1	3	Light Fraction	2		1	2			פרקי שורש	culm roots	דגניים	Gramineae	1
NZN-104	Nitzana	Tepper and Bar-Oz	דניאל	2017-2020	C	306	3042-1	3	Heavy Residue	2		1	1	חיטה/שעורה	Hordeum/Triticum	גרגיר	grain	דגניים	Gramineae	2	כנראה שעורה
NZN-104	Nitzana	Tepper and Bar-Oz	דניאל	2017-2020	C	306	3042-1	3	Heavy Residue	2		2	2	עדשה	Lens culinaris	פסיג	cotyledon	פרפרניים	Fabaceae	1
NZN-104	Nitzana	Tepper and Bar-Oz	דניאל	2017-2020	C	306	3042-1	3	Heavy Residue	2		7	3	בלתי
NZN-105	Nitzana	Tepper and Bar-Oz	דניאל	2017-2020	C	306	3062-2	3	Light Fraction	2		1	1	שעורה	Hordeum	גרגיר	grain	דגניים	Gramineae	1
NZN-105	Nitzana	Tepper and Bar-Oz	דניאל	2017-2020	C	306	3062-2	3	Light Fraction	2		8	2	עץ לא מפוחם
NZN-105	Nitzana	Tepper and Bar-Oz	דניאל	2017-2020	C	306	3062-2	3	Light Fraction	2		8	3	חרק		רגל וכנפיים					רצנטי?
NZN-105	Nitzana	Tepper and Bar-Oz	דניאל	2017-2020	C	306	3062-2	3	Light Fraction	2		8	4	גללים?							של מכרסם? עם אהל בפנים
NZN-105	Nitzana	Tepper and Bar-Oz	דניאל	2017-2020	C	306	3062-2	3	Light Fraction	1			5	דגני		גרגיר	grain	דגניים	Gramineae	4	שעורה?
NZN-105	Nitzana	Tepper and Bar-Oz	דניאל	2017-2020	C	306	3062-2	3	Light Fraction	1			6	שעורה?	Hordeum?	גרגיר	grain	דגניים	Gramineae	1	לחבר בהמשך
NZN-105	Nitzana	Tepper and Bar-Oz	דניאל	2017-2020	C	306	3062-2	3	Light Fraction	1			7	דגני		גרגיר	grain	דגניים	Gramineae	3	לחבר בהמשך
NZN-105	Nitzana	Tepper and Bar-Oz	דניאל	2017-2020	C	306	3062-2	3	Light Fraction	1			8	דגני- בלתי		גרגיר	grain	דגניים	Gramineae	6
NZN-105	Nitzana	Tepper and Bar-Oz	דניאל	2017-2020	C	306	3062-2	3	Light Fraction	1			9	עוקצר?		גרגיר	grain	דגניים	Gramineae	2
NZN-105	Nitzana	Tepper and Bar-Oz	דניאל	2017-2020	C	306	3062-2	3	Light Fraction	1			10	דגני		פרקי גבעול	culm nodes	דגניים	Gramineae	17
NZN-105	Nitzana	Tepper and Bar-Oz	דניאל	2017-2020	C	306	3062-2	3	Light Fraction	1			11	שברי דגן				דגניים	Gramineae		לא נספר
NZN-105	Nitzana	Tepper and Bar-Oz	דניאל	2017-2020	C	306	3062-2	3	Light Fraction	1			12	שעורה שש-טורית	Hordeum vulgare hexastichum	פרק ציר שיבולת	rachis fragment	דגניים	Gramineae	7
NZN-105	Nitzana	Tepper and Bar-Oz	דניאל	2017-2020	C	306	3062-2	3	Light Fraction	1			13	שעורה דו-טורית/התבור	Hordeum vulgare distichum/spontaneum	פרק ציר שיבולת	rachis fragments	דגניים	Graminae	1
NZN-105	Nitzana	Tepper and Bar-Oz	דניאל	2017-2020	C	306	3062-2	3	Light Fraction	1			14	שעורה	Hordeum	פרק ציר שיבולת	rachis fragments	דגניים	Graminae	11
NZN-105	Nitzana	Tepper and Bar-Oz	דניאל	2017-2020	C	306	3062-2	3	Light Fraction	1			15	חיטה/שעורה	Hordeum/Triticum	פרק ציר שיבולת	rachis fragments	דגניים	Gramineae	2
NZN-105	Nitzana	Tepper and Bar-Oz	דניאל	2017-2020	C	306	3062-2	3	Light Fraction	1			16	חיטה טטרפלוידית	Triticum turgidum s.l.	פרק ציר שיבולת	rachis fragment	דגניים	Gramineae	1
NZN-105	Nitzana	Tepper and Bar-Oz	דניאל	2017-2020	C	306	3062-2	3	Light Fraction	1			17	דגני		פרק ראשון	first rachis fragments	דגניים	Gramineae	1
NZN-105	Nitzana	Tepper and Bar-Oz	דניאל	2017-2020	C	306	3062-2	3	Light Fraction	1			18	דגני		מלען	awn	דגניים	Gramineae	1
NZN-105	Nitzana	Tepper and Bar-Oz	דניאל	2017-2020	C	306	3062-2	3	Light Fraction	1			19	פרפרני קטן		זרע	seed	פרפרניים	Fabaceae	7
NZN-105	Nitzana	Tepper and Bar-Oz	דניאל	2017-2020	C	306	3062-2	3	Light Fraction	1			20	מתנן שעיר	Thymelaea hirsuta	פרי	fruit	מתנניים	Thymelaeaceae	1
NZN-105	Nitzana	Tepper and Bar-Oz	דניאל	2017-2020	C	306	3062-2	3	Light Fraction	1			21	מתנן שעיר	Thymelaea hirsuta	עלה	leaf	מתנניים	Thymelaeaceae	3
NZN-105	Nitzana	Tepper and Bar-Oz	דניאל	2017-2020	C	306	3062-2	3	Light Fraction	1			22	בר עכנאי	Echiochilon	זרע	seed	זיפניים	Boraginaceae	1	לא מפוחם
NZN-105	Nitzana	Tepper and Bar-Oz	דניאל	2017-2020	C	306	3062-2	3	Light Fraction	1			23	ארנבית שרועה	Arnebia decumbrens	זרע	seed	זיפניים	Boraginaceae	1
NZN-105	Nitzana	Tepper and Bar-Oz	דניאל	2017-2020	C	306	3062-2	3	Light Fraction	1			24	פיקוס התאנה	Ficus carica	אגוזית	nutlet	תותיים	Moraceae	1	דבוק לציפה/גלל
NZN-105	Nitzana	Tepper and Bar-Oz	דניאל	2017-2020	C	306	3062-2	3	Light Fraction	1			25	חלמית קטנת-פרחים/חדת-אונות	Malva parviflora/oxyloba	זרע	seed	חלמיתיים	Malvaceae	2
NZN-105	Nitzana	Tepper and Bar-Oz	דניאל	2017-2020	C	306	3062-2	3	Light Fraction	1			26	מצליבים-ליואל				מצליבים	Brassicaceae	1
NZN-105	Nitzana	Tepper and Bar-Oz	דניאל	2017-2020	C	306	3062-2	3	Light Fraction	1			27	חפורית קטנה? להגדרה						1	חפורית קטנה?
NZN-105	Nitzana	Tepper and Bar-Oz	דניאל	2017-2020	C	306	3062-2	3	Light Fraction	1			28	בלתי ליואל						1
NZN-105	Nitzana	Tepper and Bar-Oz	דניאל	2017-2020	C	306	3062-2	3	Light Fraction	1			29	בלתי						4
NZN-105	Nitzana	Tepper and Bar-Oz	דניאל	2017-2020	C	306	3062-2	3	Light Fraction	1			30	רצנטי?
NZN-105	Nitzana	Tepper and Bar-Oz	דניאל	2017-2020	C	306	3062-2	3	Light Fraction	1			31	צדפות
NZN-105	Nitzana	Tepper and Bar-Oz	דניאל	2017-2020	C	306	3062-2	3	Light Fraction	1			32	בלתי-שונות
NZN-106	Nitzana	Tepper and Bar-Oz	דניאל	2017-2020	C	306	3062-2	3	Heavy Residue	2		8	1	בלתי-שונות							לא להתעסק
NZN-107	Nitzana	Tepper and Bar-Oz	דניאל	2017-2020	C	309	3069-1	3	Light Fraction	2		1	1	שעורה	Hordeum vulgare	גרגיר	grain	דגניים	Gramineae	2
NZN-107	Nitzana	Tepper and Bar-Oz	דניאל	2017-2020	C	309	3069-1	3	Light Fraction	2		1	2	חיטה	Triticum	גרגיר	grain	דגניים	Gramineae	1
NZN-107	Nitzana	Tepper and Bar-Oz	דניאל	2017-2020	C	309	3069-1	3	Light Fraction	2		6	3	אהל מצוי	Mesembryanthemum nodiflorum		seed	חיעדיים	Aizoaceae		רצנטי
NZN-107	Nitzana	Tepper and Bar-Oz	דניאל	2017-2020	C	309	3069-1	3	Light Fraction	2		6	4	חלמית	Malva sp.		mericarp	חלמיתיים	Malvaceae		רצנטי
NZN-107	Nitzana	Tepper and Bar-Oz	דניאל	2017-2020	C	309	3069-1	3	Light Fraction	2		8	5	גלל וחרק							רצנטי
NZN-107	Nitzana	Tepper and Bar-Oz	דניאל	2017-2020	C	309	3069-1	3	Light Fraction	2			6	קינואה	Quinoa					1	רצנטי	from quinoa test
NZN-108	Nitzana	Tepper and Bar-Oz	דניאל	2017-2020	C	309	3069-1	3	Heavy Residue	2		1	1	חיטה	Triticum	גרגיר	grain	דגניים	Gramineae	1
NZN-108	Nitzana	Tepper and Bar-Oz	דניאל	2017-2020	C	309	3069-1	3	Heavy Residue	2		1	2	חיטה/שעורה	Hordeum/Triticum	גרגיר	grain	דגניים	Gramineae	1
NZN-108	Nitzana	Tepper and Bar-Oz	דניאל	2017-2020	C	309	3069-1	3	Heavy Residue	2		7	3	בלתי-שונות
NZN-109	Nitzana	Tepper and Bar-Oz	דניאל	2017-2020	C	310	3049-2	3	Light Fraction	2		1	1	שעורה	Hordeum	גרגיר	grain	דגניים	Gramineae	3
NZN-109	Nitzana	Tepper and Bar-Oz	דניאל	2017-2020	C	310	3049-2	3	Light Fraction	2		1	2	חיטה	Triticum	גרגיר	grain	דגניים	Gramineae	2
NZN-109	Nitzana	Tepper and Bar-Oz	דניאל	2017-2020	C	310	3049-2	3	Light Fraction	2		1	3	חיטה/שעורה	Hordeum/Triticum	גרגיר	grain	דגניים	Gramineae	3
NZN-109	Nitzana	Tepper and Bar-Oz	דניאל	2017-2020	C	310	3049-2	3	Light Fraction	2		1	4	חיטה/שעורה	Hordeum/Triticum	פרק ציר שיבולת	rachis fragments	דגניים	Gramineae	1	עם 3 פרקים
NZN-109	Nitzana	Tepper and Bar-Oz	דניאל	2017-2020	C	310	3049-2	3	Light Fraction	2		1	5	cf. חיטה/שעורה	cf. Hordeum/Triticum	פרקי גבעול	culm nodes	דגניים	Gramineae	1
NZN-109	Nitzana	Tepper and Bar-Oz	דניאל	2017-2020	C	310	3049-2	3	Light Fraction	2		3	6	גפן	Vitis vinifera	עוקץ	pedicel	גפניים	Vitaceae	1
NZN-109	Nitzana	Tepper and Bar-Oz	דניאל	2017-2020	C	310	3049-2	3	Light Fraction	2		2	7	עדשה תרבותית	Lens culinaris	זרע	seed	פרפרניים	Fabaceae	1
NZN-109	Nitzana	Tepper and Bar-Oz	דניאל	2017-2020	C	310	3049-2	3	Light Fraction	2		2	8	בקיית הכרשינה	Vicia ervilia	זרע	seed	פרפרניים	Fabaceae	1
NZN-109	Nitzana	Tepper and Bar-Oz	דניאל	2017-2020	C	310	3049-2	3	Light Fraction	2			9	cf. חיטה/שעורה	cf. Hordeum/Triticum	שרשי דגן	roots	דגניים	Gramineae	1
NZN-109	Nitzana	Tepper and Bar-Oz	דניאל	2017-2020	C	310	3049-2	3	Light Fraction	2			10	תמר מצוי	Phoenix dactylifera	שבר גלעין	stone fragment	דקליים	Palmae	1
NZN-109	Nitzana	Tepper and Bar-Oz	דניאל	2017-2020	C	310	3049-2	3	Light Fraction	2			11	בלתי-שונות
NZN-109	Nitzana	Tepper and Bar-Oz	דניאל	2017-2020	C	310	3049-2	3	Light Fraction	2			12	גללים		שבר גלל
NZN-109	Nitzana	Tepper and Bar-Oz	דניאל	2017-2020	C	310	3049-2	3	Light Fraction	1			13	דגני		גרגיר	grain	דגניים	Gramineae	3
NZN-109	Nitzana	Tepper and Bar-Oz	דניאל	2017-2020	C	310	3049-2	3	Light Fraction	1			14	דגני		פרקי גבעול	culm nodes	דגניים	Gramineae	8
NZN-109	Nitzana	Tepper and Bar-Oz	דניאל	2017-2020	C	310	3049-2	3	Light Fraction	1			15	שברי דגן				דגניים	Gramineae		לא נספר
NZN-109	Nitzana	Tepper and Bar-Oz	דניאל	2017-2020	C	310	3049-2	3	Light Fraction	1			16	שעורה שש-טורית מגלל	Hordeum vulgare hexastichum	פרק ציר שיבולת	rachis fragment	דגניים	Gramineae	1
NZN-109	Nitzana	Tepper and Bar-Oz	דניאל	2017-2020	C	310	3049-2	3	Light Fraction	1			17	שעורה שש-טורית	Hordeum vulgare hexastichum	פרק ציר שיבולת	rachis fragment	דגניים	Gramineae	12
NZN-109	Nitzana	Tepper and Bar-Oz	דניאל	2017-2020	C	310	3049-2	3	Light Fraction	1			18	שעורה	Horfeum sp.	פרק ציר שיבולת	rachis fragment	דגניים	Gramineae	11
NZN-109	Nitzana	Tepper and Bar-Oz	דניאל	2017-2020	C	310	3049-2	3	Light Fraction	1			19	חיטה/שעורה	Hordeum/Triticum	פרק ראשון	first rachis fragments	דגניים	Gramineae	1
NZN-109	Nitzana	Tepper and Bar-Oz	דניאל	2017-2020	C	310	3049-2	3	Light Fraction	1			20	חיטה/שעורה?	Hordeum/Triticum?	פרק ציר שיבולת	rachis fragment	דגניים	Gramineae	9	דגני
NZN-109	Nitzana	Tepper and Bar-Oz	דניאל	2017-2020	C	310	3049-2	3	Light Fraction	1			21	חיטה/שעורה	Hordeum/Triticum	פרק ציר שיבולת בלי מפרק	rachis internode	דגניים	Gramineae	6
NZN-109	Nitzana	Tepper and Bar-Oz	דניאל	2017-2020	C	310	3049-2	3	Light Fraction	1			22	חיטה טטרפלוידית	Triticum turgidum s.l.	פרק ציר שיבולת	rachis fragment	דגניים	Gramineae	2
NZN-109	Nitzana	Tepper and Bar-Oz	דניאל	2017-2020	C	310	3049-2	3	Light Fraction	1			23	פיקוס התאנה	Ficus carica	אגוזית	nutlet	תותיים	Moraceae	1
NZN-109	Nitzana	Tepper and Bar-Oz	דניאל	2017-2020	C	310	3049-2	3	Light Fraction	1			24	קינואה רצנטי	quinoa recent	זרע	seed	ירבוזיים	Amaranthaceae	127	לא היה בדגימה. דניאל הוסיף את הקינואה בשביל לבדוק עניין מסויים
NZN-109	Nitzana	Tepper and Bar-Oz	דניאל	2017-2020	C	310	3049-2	3	Light Fraction	1			25	מתנן שעיר	Thymelaea hirsuta	עלה	leaf	מתנניים	Thymelaeaceae	2
NZN-109	Nitzana	Tepper and Bar-Oz	דניאל	2017-2020	C	310	3049-2	3	Light Fraction	1			26	חלמית קטנת-פרחים/חדת-אונות	Malva parviflora/oxyloba	זרע	seed	חלמיתיים	Malvaceae	2
NZN-109	Nitzana	Tepper and Bar-Oz	דניאל	2017-2020	C	310	3049-2	3	Light Fraction	1			27	ליואל-תפרחת?		תפרחת	inflorescence			2
NZN-109	Nitzana	Tepper and Bar-Oz	דניאל	2017-2020	C	310	3049-2	3	Light Fraction	1			28	ליואל						1
NZN-109	Nitzana	Tepper and Bar-Oz	דניאל	2017-2020	C	310	3049-2	3	Light Fraction	1			29	בלתי						25
NZN-110	Nitzana	Tepper and Bar-Oz	דניאל	2017-2020	C	310	3049-2	3	Heavy Residue	2		3	1	גפן	Vitis vinifera	חרצן	pip	גפניים	Vitaceae	1
NZN-110	Nitzana	Tepper and Bar-Oz	דניאל	2017-2020	C	310	3049-2	3	Heavy Residue	2		3	2	גפן?	Vitis vinifera?	זג?	exocarp?	גפניים?	Vitaceae?
NZN-110	Nitzana	Tepper and Bar-Oz	דניאל	2017-2020	C	310	3049-2	3	Heavy Residue	2		7	3	בלתי-שונות
NZN-110	Nitzana	Tepper and Bar-Oz	דניאל	2017-2020	C	310	3049-2	3	Heavy Residue	2			4	קינואה	Quinoa					9
NZN-111	Nitzana	Tepper and Bar-Oz	דניאל	2017-2020	C	310	3058-2	3	Light Fraction	2		1	1	שעורה	Hordeum	גרגיר	grain	דגניים	Gramineae	4
NZN-111	Nitzana	Tepper and Bar-Oz	דניאל	2017-2020	C	310	3058-2	3	Light Fraction	2		1	2	חיטה/שעורה	Hordeum/Triticum	גרגיר	grain	דגניים	Gramineae	1
NZN-111	Nitzana	Tepper and Bar-Oz	דניאל	2017-2020	C	310	3058-2	3	Light Fraction	2			3	cf. חיטה/שעורה	cf. Hordeum/Triticum	פרקי גבעול	culm nodes	דגניים	Gramineae	1
NZN-111	Nitzana	Tepper and Bar-Oz	דניאל	2017-2020	C	310	3058-2	3	Light Fraction	2			4	גפן	Vitis vinifera	עוקץ	pedicel	גפניים	Vitaceae	1
NZN-111	Nitzana	Tepper and Bar-Oz	דניאל	2017-2020	C	310	3058-2	3	Light Fraction	2			5	פיקוס התאנה	Ficus carica	ציפה ואגוזית	pulp and nutlet?	תותיים	Moraceae	1	2 אגוזיות
NZN-111	Nitzana	Tepper and Bar-Oz	דניאל	2017-2020	C	310	3058-2	3	Light Fraction	2			6	בלתי-שונות
NZN-111	Nitzana	Tepper and Bar-Oz	דניאל	2017-2020	C	310	3058-2	3	Light Fraction	2			7	EMPTY
NZN-111	Nitzana	Tepper and Bar-Oz	דניאל	2017-2020	C	310	3058-2	3	Light Fraction	1			8	דגני	Gramineae	גרגיר	grain	דגניים	Gramineae	2
NZN-111	Nitzana	Tepper and Bar-Oz	דניאל	2017-2020	C	310	3058-2	3	Light Fraction	1			9	זון אשון/רב-פרחים	Lolium rigidum/multiflorum	גרגיר	grain	דגניים	Gramineae	1
NZN-111	Nitzana	Tepper and Bar-Oz	דניאל	2017-2020	C	310	3058-2	3	Light Fraction	1			10	שברי דגן		גרגיר	grain	דגניים	Gramineae		לא נספר
NZN-111	Nitzana	Tepper and Bar-Oz	דניאל	2017-2020	C	310	3058-2	3	Light Fraction	1			11	חיטה/שעורה cf.	cf. Triticum/Hordeum	פרקי גבעול	culm nodes	דגניים	Gramineae	4
NZN-111	Nitzana	Tepper and Bar-Oz	דניאל	2017-2020	C	310	3058-2	3	Light Fraction	1			12	שעורה שש-טורית	Hordeum vulgare hexastichum	פרק ציר שיבולת	rachis fragment	דגניים	Gramineae	6
NZN-111	Nitzana	Tepper and Bar-Oz	דניאל	2017-2020	C	310	3058-2	3	Light Fraction	1			13	שעורה דו-טורית/התבור	Hordeum vulgare disticum/spontaneum	פרק ציר שיבולת	rachis fragments	דגניים	Graminae	2
NZN-111	Nitzana	Tepper and Bar-Oz	דניאל	2017-2020	C	310	3058-2	3	Light Fraction	1			14	חיטה/שעורה	Hordeum/Triticum	פרק ציר שיבולת	rachis fragments	דגניים	Gramineae	3
NZN-111	Nitzana	Tepper and Bar-Oz	דניאל	2017-2020	C	310	3058-2	3	Light Fraction	1			15	שעורה	Hordeum	פרק ציר שיבולת	rachis fragments	דגניים	Graminae	6
NZN-111	Nitzana	Tepper and Bar-Oz	דניאל	2017-2020	C	310	3058-2	3	Light Fraction	1			16	חיטה טטרפלוידית	Triticum turgidum s.l.	פרק ציר שיבולת	rachis fragment	דגניים	Gramineae	3
NZN-111	Nitzana	Tepper and Bar-Oz	דניאל	2017-2020	C	310	3058-2	3	Light Fraction	1			17	חיטה	Triticum sp.	פרק ציר שיבולת	rachis fragment	דגניים	Gramineae	1
NZN-111	Nitzana	Tepper and Bar-Oz	דניאל	2017-2020	C	310	3058-2	3	Light Fraction	1			18	פרפרני קטן		זרע	seed	פרפרניים	Fabaceae	29
NZN-111	Nitzana	Tepper and Bar-Oz	דניאל	2017-2020	C	310	3058-2	3	Light Fraction	1			19	פרפרני קטן- גרגרנית ערבית?	Trigonella arabica?	זרע	seed	פרפרניים	Fabaceae	8	גבשושיות וגודל מתאימים לגרגרנית ערבית אבל ההילום/יחס שורשון לפסיג מדאיג
NZN-111	Nitzana	Tepper and Bar-Oz	דניאל	2017-2020	C	310	3058-2	3	Light Fraction	1			20	פיקוס התאנה	Ficus carica	אגוזית	nutlet	תותיים	Moraceae	5
NZN-111	Nitzana	Tepper and Bar-Oz	דניאל	2017-2020	C	310	3058-2	3	Light Fraction	1			21	חלמית קטנת-פרחים/חדת-אונות	Malva parviflora/oxyloba	זרע	seed	חלמיתיים	Malvaceae	1
NZN-111	Nitzana	Tepper and Bar-Oz	דניאל	2017-2020	C	310	3058-2	3	Light Fraction	1			22	חלמית	Malva	פרודה	mericarp	חלמתיים	Malvaceae	1
NZN-111	Nitzana	Tepper and Bar-Oz	דניאל	2017-2020	C	310	3058-2	3	Light Fraction	1			23	ארנבית שרועה	Arnebia decumbrens	זרע	seed	זיפניים	Boraginaceae	1	לא מפוחם
NZN-111	Nitzana	Tepper and Bar-Oz	דניאל	2017-2020	C	310	3058-2	3	Light Fraction	1			24	בר עכנאי	Echiochilon	זרע	seed	זיפניים	Boraginaceae	2	לא מפוחם
NZN-111	Nitzana	Tepper and Bar-Oz	דניאל	2017-2020	C	310	3058-2	3	Light Fraction	1			25	גלעינית זעירת פרחים	Buglossoides tenuiflora	זרע	seed	זיפניים	Boraginaceae	1	לא מפוחם
NZN-111	Nitzana	Tepper and Bar-Oz	דניאל	2017-2020	C	310	3058-2	3	Light Fraction	1			26	שלוחית שעירה/קרחת	Andrachne telephioides/aspera	קשווה	valve	חלבלוביים	Euphorbiaceae	4
NZN-111	Nitzana	Tepper and Bar-Oz	דניאל	2017-2020	C	310	3058-2	3	Light Fraction	1			27	מתנן שעיר	Thymelaea hirsuta	עלה	leaf	מתנניים	Thymelaeaceae	1
NZN-111	Nitzana	Tepper and Bar-Oz	דניאל	2017-2020	C	310	3058-2	3	Light Fraction	1			28	בלתי						2
NZN-111	Nitzana	Tepper and Bar-Oz	דניאל	2017-2020	C	310	3058-2	3	Light Fraction	1			29	ליואל						1
NZN-111	Nitzana	Tepper and Bar-Oz	דניאל	2017-2020	C	310	3058-2	3	Light Fraction	1			30	ליואל						1
NZN-111	Nitzana	Tepper and Bar-Oz	דניאל	2017-2020	C	310	3058-2	3	Light Fraction	1			31	בלתי-שונות- להראות ליואל?							לא נספר
NZN-112	Nitzana	Tepper and Bar-Oz	דניאל	2017-2020	C	310	3058-2	3	Heavy Residue	2			1	חיטה/שעורה	Hordeum/Triticum	גרגיר	grain	דגניים	Gramineae	2
NZN-112	Nitzana	Tepper and Bar-Oz	דניאל	2017-2020	C	310	3058-2	3	Heavy Residue	2			2	בלתי						1	קטנית?
NZN-112	Nitzana	Tepper and Bar-Oz	דניאל	2017-2020	C	310	3058-2	3	Heavy Residue	2			3	טיח?							השווה לטיח בשטח A
NZN-113	Nitzana	Tepper and Bar-Oz	דניאל	2017-2020	C	310	3059-2	3	Light Fraction	2		1	1	שעורה	Hordeum	גרגיר	grain	דגניים	Gramineae	8
NZN-113	Nitzana	Tepper and Bar-Oz	דניאל	2017-2020	C	310	3059-2	3	Light Fraction	2		1	2	חיטה/שעורה	Hordeum/Triticum	גרגיר	grain	דגניים	Gramineae	4	נראה בכיוון של שעורה
NZN-113	Nitzana	Tepper and Bar-Oz	דניאל	2017-2020	C	310	3058-3	3	Light Fraction	1			3	שעורה שש-טורית	Hordeum vulgare hexastichum	פרק ציר שיבולת	rachis fragment	דגניים	Gramineae	3
NZN-113	Nitzana	Tepper and Bar-Oz	דניאל	2017-2020	C	310	3059-2	3	Light Fraction	1			4	שעורה דו-טורית/התבור	Hordeum vulgare disticum/spontaneum	פרק ציר שיבולת	rachis fragments	דגניים	Graminae	1
NZN-113	Nitzana	Tepper and Bar-Oz	דניאל	2017-2020	C	310	3059-2	3	Light Fraction	1			5	שעורה	Hordeum	פרק ציר שיבולת	rachis fragments	דגניים	Graminae	3
NZN-113	Nitzana	Tepper and Bar-Oz	דניאל	2017-2020	C	310	3058-4	3	Light Fraction	1			6	חיטה טטרפלוידית	Triticum turgidum s.l.	פרק ציר שיבולת	rachis fragment	דגניים	Gramineae	2
NZN-113	Nitzana	Tepper and Bar-Oz	דניאל	2017-2020	C	310	3059-2	3	Light Fraction	1			7	דגני	Gramineae	פרק ציר שיבולת	rachis fragment	דגניים	Gramineae	6
NZN-113	Nitzana	Tepper and Bar-Oz	דניאל	2017-2020	C	310	3059-2	3	Light Fraction	1			8	שעורה	Hordeum sp.	גרגיר	grain	דגניים	Gramineae	2
NZN-113	Nitzana	Tepper and Bar-Oz	דניאל	2017-2020	C	310	3058-5	3	Light Fraction	1			9	cf. עוקצר מצוי	cf. Brachypodium distachyon	גרגיר	grain	דגניים	Gramineae	1
NZN-113	Nitzana	Tepper and Bar-Oz	דניאל	2017-2020	C	310	3059-2	3	Light Fraction	1			10	זון משכר	Lolium temulentum	גרגיר	grain	דגניים	Gramineae	2
NZN-113	Nitzana	Tepper and Bar-Oz	דניאל	2017-2020	C	310	3059-2	3	Light Fraction	1			11	דגני		גרגיר	grain	דגניים	Gramineae	1	דומה לזון
NZN-113	Nitzana	Tepper and Bar-Oz	דניאל	2017-2020	C	310	3058-6	3	Light Fraction	1			12	שברי דגן		גרגיר	grain	דגניים	Gramineae		לא נספר
NZN-113	Nitzana	Tepper and Bar-Oz	דניאל	2017-2020	C	310	3058-6	3	Light Fraction	1			13	חיטה/שעורה	Hordeum/Triticum	פרקי גבעול	culm node	דגניים	Gramineae		לא נספר
NZN-113	Nitzana	Tepper and Bar-Oz	דניאל	2017-2020	C	310	3059-2	3	Light Fraction	1			14	פרפרני קטן	small-seeded legume	זרע	seed	פרפרניים	Fabaceae	1
NZN-113	Nitzana	Tepper and Bar-Oz	דניאל	2017-2020	C	310	3059-2	3	Light Fraction	1			15	פרפרני		זרע	seed	פרפרניים	Fabaceae	2	מח' 2 עמ' 142
NZN-113	Nitzana	Tepper and Bar-Oz	דניאל	2017-2020	C	310	3058-7	3	Light Fraction	1			16	פרפרני קטן		זרע	seed	פרפרניים	Fabaceae	41
NZN-113	Nitzana	Tepper and Bar-Oz	דניאל	2017-2020	C	310	3058-7	3	Light Fraction	1			17	קדד/גרגרנית	Astragalus/Trigonella	זרע	seed	פרפרניים	Fabaceae	2
NZN-113	Nitzana	Tepper and Bar-Oz	דניאל	2017-2020	C	310	3059-2	3	Light Fraction	1			18	בר עכנאי שיחני	Echiochilon fruticosum	זרע	seed	זיפניים	Boraginaceae	11	5 מתוכם לא מפוחמים
NZN-113	Nitzana	Tepper and Bar-Oz	דניאל	2017-2020	C	310	3059-2	3	Light Fraction	1			19	ארנבית שרועה	Arnebia decumbrens	זרע	seed	זיפניים	Boraginaceae	1	לא מפוחם
NZN-113	Nitzana	Tepper and Bar-Oz	דניאל	2017-2020	C	310	3058-8	3	Light Fraction	1			20	מתנן שעיר	Thymelaea hirsuta	עלה	leaf	מתנניים	Thymelaeaceae	2
NZN-113	Nitzana	Tepper and Bar-Oz	דניאל	2017-2020	C	310	3058-8	3	Light Fraction	1			21	פיקוס התאנה	Ficus carica	אגוזית	nutlet	תותיים	Moraceae	10
NZN-113	Nitzana	Tepper and Bar-Oz	דניאל	2017-2020	C	310	3059-2	3	Light Fraction	1			22	פרגה	Glaucium sp.	זרע	seed	פרגיים	Papaveraceae	1	לא מפוחם/ להגדיר בהמשך
NZN-113	Nitzana	Tepper and Bar-Oz	דניאל	2017-2020	C	310	3059-2	3	Light Fraction	1			23	מצליבים	Brassicaceae	פרק תרמיל	pod	מצליבים	Brassicaceae	1
NZN-113	Nitzana	Tepper and Bar-Oz	דניאל	2017-2020	C	310	3058-9	3	Light Fraction	1			24	אשליל?		גבעול	stem	אשליים	Tamaricaceae	1	להכריע בהמשך
NZN-113	Nitzana	Tepper and Bar-Oz	דניאל	2017-2020	C	310	3058-9	3	Light Fraction	1			25	אהל מצוי	Mesembryanthemum nodiflorum	זרע	seed	חיעדיים	Aizoaceae	1	לא מפוחם. -רצנטי?
NZN-113	Nitzana	Tepper and Bar-Oz	דניאל	2017-2020	C	310	3059-2	3	Light Fraction	1			26	להגדיר בהמשך		קרקפת	head	מורכבים	Asteraceae	1
NZN-113	Nitzana	Tepper and Bar-Oz	דניאל	2017-2020	C	310	3059-2	3	Light Fraction	1			27	להגדיר בהמשך		קרקפת	head	מורכבים	Asteraceae	1	זה והקודם שני טיפוסים שונים
NZN-113	Nitzana	Tepper and Bar-Oz	דניאל	2017-2020	C	310	3058-10	3	Light Fraction	1			28	יבלית מצויה בגלל	Cynodon dactylon	גרגיר בגלל	grain in dung	דגניים	Gramineae	1	דגני בגלל
NZN-113	Nitzana	Tepper and Bar-Oz	דניאל	2017-2020	C	310	3058-10	3	Light Fraction	1			29	רצנטי?	recent?					3
NZN-113	Nitzana	Tepper and Bar-Oz	דניאל	2017-2020	C	310	3059-2	3	Light Fraction	1			30	בלתי		נבט?	seedling?			1	שורשון נובט?
NZN-113	Nitzana	Tepper and Bar-Oz	דניאל	2017-2020	C	310	3059-2	3	Light Fraction	1			31	בלתי שונות
NZN-114	Nitzana	Tepper and Bar-Oz	דניאל	2017-2020	C	310	3059-2	3	Heavy Residue	2		1	1	חיטה/שעורה	Hordeum/Triticum	גרגיר	grain	דגניים	Gramineae	2
NZN-114	Nitzana	Tepper and Bar-Oz	דניאל	2017-2020	C	310	3059-2	3	Heavy Residue	2		8	2	טיח?							השווה לטיח בשטח A
NZN-115	Nitzana	Tepper and Bar-Oz	דניאל	2017-2020	C	310	3064-2	3	Light Fraction	2			1	שעורה	Hordeum vulgare	גרגיר	grain	דגניים	Gramineae	21
NZN-115	Nitzana	Tepper and Bar-Oz	דניאל	2017-2020	C	310	3064-2	3	Light Fraction	2			2	חיטה	Triticum	גרגיר	grain	דגניים	Gramineae	8
NZN-115	Nitzana	Tepper and Bar-Oz	דניאל	2017-2020	C	310	3064-2	3	Light Fraction	2			3	חיטה/שעורה	Hordeum/Triticum	גרגיר	grain	דגניים	Gramineae	4
NZN-115	Nitzana	Tepper and Bar-Oz	דניאל	2017-2020	C	310	3064-2	3	Light Fraction	2			4	חיטה/שעורה	Hordeum/Triticum	חצאי גרגיר	grain halves	דגניים	Gramineae		MNI=23
NZN-115	Nitzana	Tepper and Bar-Oz	דניאל	2017-2020	C	310	3064-2	3	Light Fraction	2			5	עדשה תרבותית	Lens culinaris	זרע	seed	פרפרניים	Fabaceae	1
NZN-115	Nitzana	Tepper and Bar-Oz	דניאל	2017-2020	C	310	3064-2	3	Light Fraction	2			6	בלתי-שונות
NZN-116	Nitzana	Tepper and Bar-Oz	דניאל	2017-2020	C	310	3064-2	3	Heavy Residue	2			1	חיטה/שעורה	Hordeum/Triticum	חצאי גרגיר	grain halves	דגניים	Gramineae
NZN-116	Nitzana	Tepper and Bar-Oz	דניאל	2017-2020	C	310	3064-2	3	Heavy Residue	2			2	עדשה תרבותית	Lens culinaris	זרע	seed	פרפרניים	Fabaceae	5	2שלמים ו6פסיגים
NZN-116	Nitzana	Tepper and Bar-Oz	דניאל	2017-2020	C	310	3064-2	3	Heavy Residue	2			3	בקיים	Vicieae	פסיג	cotyledon	פרפרניים	Fabaceae	2
NZN-116	Nitzana	Tepper and Bar-Oz	דניאל	2017-2020	C	310	3064-2	3	Heavy Residue	2			4	בלתי-שונות
NZN-116	Nitzana	Tepper and Bar-Oz	דניאל	2017-2020	C	310	3064-2	3	Heavy Residue	2			5	גלל?
NZN-116	Nitzana	Tepper and Bar-Oz	דניאל	2017-2020	C	310	3064-2	3	Heavy Residue	2			6	קשקש דג
NZN-117	Nitzana	Tepper and Bar-Oz	דניאל	2017-2020	C	310	3065-2	3	Light Fraction	2			1	שעורה	Hordeum vulgare	גרגיר	grain	דגניים	Gramineae	58
NZN-117	Nitzana	Tepper and Bar-Oz	דניאל	2017-2020	C	310	3065-2	3	Light Fraction	2			2	חיטה	Triticum	גרגיר	grain	דגניים	Gramineae	10
NZN-117	Nitzana	Tepper and Bar-Oz	דניאל	2017-2020	C	310	3065-2	3	Light Fraction	2			3	חיטה/שעורה	Hordeum/Triticum	גרגיר	grain	דגניים	Gramineae	11
NZN-117	Nitzana	Tepper and Bar-Oz	דניאל	2017-2020	C	310	3065-2	3	Light Fraction	2			4	גפן	Vitis vinifera	אנדוספרם	endosperm	גפניים	Vitaceae	2
NZN-117	Nitzana	Tepper and Bar-Oz	דניאל	2017-2020	C	310	3065-2	3	Light Fraction	2			5	חיטה/שעורה	Hordeum/Triticum	חצאי גרגיר	grain halves	דגניים	Gramineae		יותר מהדגימה הקודמת
NZN-117	Nitzana	Tepper and Bar-Oz	דניאל	2017-2020	C	310	3065-2	3	Light Fraction	2			6	cf. חיטה/שעורה	cf. Hordeum/Triticum	פרקי גבעול	culm nodes	דגניים	Gramineae	4
NZN-117	Nitzana	Tepper and Bar-Oz	דניאל	2017-2020	C	310	3065-2	3	Light Fraction	2			7	עדשה תרבותית	Lens culinaris	פסיג	cotyledon	פרפרניים	Fabaceae	1
NZN-117	Nitzana	Tepper and Bar-Oz	דניאל	2017-2020	C	310	3065-2	3	Light Fraction	2			8	בקיית הכרשינה?	cf. Vicia ervilia	פסיג	cotyledon	פרפרניים	Fabaceae	1
NZN-117	Nitzana	Tepper and Bar-Oz	דניאל	2017-2020	C	310	3065-2	3	Light Fraction	2			9	בלתי		זרע שk זית?				1
NZN-117	Nitzana	Tepper and Bar-Oz	דניאל	2017-2020	C	310	3065-2	3	Light Fraction	2			10	רצנטי?
NZN-117	Nitzana	Tepper and Bar-Oz	דניאל	2017-2020	C	310	3065-2	3	Light Fraction	2			11	בלתי-שונות
NZN-117	Nitzana	Tepper and Bar-Oz	דניאל	2017-2020	C	310	3065-2	3	Light Fraction	2			12	גלל?
NZN-117	Nitzana	Tepper and Bar-Oz	דניאל	2017-2020	C	310	3065-2	3	Light Fraction	1			13	מורכבים		קרקפת	head	מורכבים	Asteraceae	1
NZN-117	Nitzana	Tepper and Bar-Oz	דניאל	2017-2020	C	310	3065-2	3	Light Fraction	1			14	שעורה	Hordeum sp.	גרגיר	grain	דגניים	Gramineae	4
NZN-117	Nitzana	Tepper and Bar-Oz	דניאל	2017-2020	C	310	3065-2	3	Light Fraction	1			15	חיטה?	cf. Triticum	גרגיר	grain	דגניים	Gramineae	2
NZN-117	Nitzana	Tepper and Bar-Oz	דניאל	2017-2020	C	310	3065-2	3	Light Fraction	1			16	שעורה שש-טורית	Hordeum vulgare hexastichum	פרק ציר שיבולת	rachis fragment	דגניים	Gramineae	2
NZN-117	Nitzana	Tepper and Bar-Oz	דניאל	2017-2020	C	310	3065-2	3	Light Fraction	1			17	שעורה דו-טורית/התבור	Hordeum vulgare disticum/spontaneum	פרק ציר שיבולת	rachis fragments	דגניים	Graminae	1
NZN-117	Nitzana	Tepper and Bar-Oz	דניאל	2017-2020	C	310	3065-2	3	Light Fraction	1			18	שעורה	Hordeum	פרק ציר שיבולת	rachis fragments	דגניים	Graminae	1
NZN-117	Nitzana	Tepper and Bar-Oz	דניאל	2017-2020	C	310	3065-2	3	Light Fraction	1			19	חיטה/שעורה	Hordeum/Triticum	פרק ציר שיבולת	rachis fragments	דגניים	Gramineae	6
NZN-117	Nitzana	Tepper and Bar-Oz	דניאל	2017-2020	C	310	3065-2	3	Light Fraction	1			20	חיטה טטרפלוידית	Triticum turgidum s.l.	פרק ציר שיבולת	rachis fragment	דגניים	Gramineae	4
NZN-117	Nitzana	Tepper and Bar-Oz	דניאל	2017-2020	C	310	3065-2	3	Light Fraction	1			21	חיטת הלחם	Triticum aestivum s.l.	פרק ציר שיבולת	rachis fragment	דגניים	Gramineae	1
NZN-117	Nitzana	Tepper and Bar-Oz	דניאל	2017-2020	C	310	3065-2	3	Light Fraction	1			22	שעורה?		גרגיר	grain	דגניים	Gramineae	1
NZN-117	Nitzana	Tepper and Bar-Oz	דניאל	2017-2020	C	310	3065-2	3	Light Fraction	1			23	דגני	Gramineae	גרגיר	grain	דגניים	Gramineae	1
NZN-117	Nitzana	Tepper and Bar-Oz	דניאל	2017-2020	C	310	3065-2	3	Light Fraction	1			24	דומה לפואנית						1
NZN-117	Nitzana	Tepper and Bar-Oz	דניאל	2017-2020	C	310	3065-2	3	Light Fraction	1			25	דגני	Gramineae	גרגיר	grain	דגניים	Gramineae	1	לא להתעסק
NZN-117	Nitzana	Tepper and Bar-Oz	דניאל	2017-2020	C	310	3065-2	3	Light Fraction	1			26	דגני- חצאי גרגיר	Gramineae	גרגיר	grain	דגניים	Gramineae	25	כ-25
NZN-117	Nitzana	Tepper and Bar-Oz	דניאל	2017-2020	C	310	3065-2	3	Light Fraction	1			27	שברי דגן	Gramineae	גרגיר	grain	דגניים	Gramineae		לא נספר. מ-2cc הראשונים
NZN-117	Nitzana	Tepper and Bar-Oz	דניאל	2017-2020	C	310	3065-2	3	Light Fraction	1			28	עוברי דגני	Gramineae	גרגיר	grain	דגניים	Gramineae	21
NZN-117	Nitzana	Tepper and Bar-Oz	דניאל	2017-2020	C	310	3065-2	3	Light Fraction	1			29	דגני	Gramineae	בסיס פרח	floret base	דגניים	Gramineae	1
NZN-117	Nitzana	Tepper and Bar-Oz	דניאל	2017-2020	C	310	3065-2	3	Light Fraction	1			30	חיטה/שעורה cf.	cf. Hordeum/Triticum	פרקי גבעול	culm node	דגניים	Gramineae	3
NZN-117	Nitzana	Tepper and Bar-Oz	דניאל	2017-2020	C	310	3065-2	3	Light Fraction	1			31	דגני		שבר מלען	awn fragment	דגניים	Gramineae
NZN-117	Nitzana	Tepper and Bar-Oz	דניאל	2017-2020	C	310	3065-2	3	Light Fraction	1			32	עדשה?	Lens?	זרע	seed	פרפרניים	Fabaceae	2
NZN-117	Nitzana	Tepper and Bar-Oz	דניאל	2017-2020	C	310	3065-2	3	Light Fraction	1			33	פרפרני קטן	small-seeded legume	זרע	seed	פרפרניים	Fabaceae	8
NZN-117	Nitzana	Tepper and Bar-Oz	דניאל	2017-2020	C	310	3065-2	3	Light Fraction	1			34	בלתי							צלבית נבדקה. לא מובהק. אולי דגני.
NZN-117	Nitzana	Tepper and Bar-Oz	דניאל	2017-2020	C	310	3065-2	3	Light Fraction	1			35	פרפרני קטן	small-seeded legume			פרפרניים	Fabaceae	2
NZN-117	Nitzana	Tepper and Bar-Oz	דניאל	2017-2020	C	310	3065-2	3	Light Fraction	1			36	קטניות		שברי זרע	seed fragments	פרפרניים	Fabaceae	12
NZN-117	Nitzana	Tepper and Bar-Oz	דניאל	2017-2020	C	310	3065-2	3	Light Fraction	1			37	פיקוס התאנה	Ficus carica	אגוזית	nutlet	תותיים	Moraceae	4
NZN-117	Nitzana	Tepper and Bar-Oz	דניאל	2017-2020	C	310	3065-2	3	Light Fraction	1			38	מקור חסידה??
NZN-117	Nitzana	Tepper and Bar-Oz	דניאל	2017-2020	C	310	3065-2	3	Light Fraction	1			39	בלתי						3	תאנה??
NZN-117	Nitzana	Tepper and Bar-Oz	דניאל	2017-2020	C	310	3065-2	3	Light Fraction	1			40	שבר לבן	Peganum harmala	זרע	seed	זוגניים	Zygophyllaceae	2	יואל אישר
NZN-117	Nitzana	Tepper and Bar-Oz	דניאל	2017-2020	C	310	3065-2	3	Light Fraction	1			41	מתנן שעיר	Thymelaea hirsuta	אגוזית	nutlet	מתנניים	Thymelaeaceae	1
NZN-117	Nitzana	Tepper and Bar-Oz	דניאל	2017-2020	C	310	3065-2	3	Light Fraction	1			42	מתנן שעיר	Thymelaea hirsuta	עלה	leaf	מתנניים	Thymelaeaceae	18
NZN-117	Nitzana	Tepper and Bar-Oz	דניאל	2017-2020	C	310	3065-2	3	Light Fraction	1			43	ארנבית שרועה	Arnebia decumbrens	זרע	seed	זיפניים	Boraginaceae	3
NZN-117	Nitzana	Tepper and Bar-Oz	דניאל	2017-2020	C	310	3065-2	3	Light Fraction	1			44	בן שלח מנוצה	Erucaria microcarpa	תרמיל	pod	מצליבים	Brassicaceae	1	למעשה זה מקור וחצי תרמיל תחתון
NZN-117	Nitzana	Tepper and Bar-Oz	דניאל	2017-2020	C	310	3065-2	3	Light Fraction	1			45	חלמית מצרית	Malva aegyptia	זרע	seed	חלמתיים	Malvaceae	1
NZN-117	Nitzana	Tepper and Bar-Oz	דניאל	2017-2020	C	310	3065-2	3	Light Fraction	1			46	גלעינית זעירת פרחים	Buglossoides tenuiflora	זרע	seed	זיפניים	Boraginaceae	1
NZN-117	Nitzana	Tepper and Bar-Oz	דניאל	2017-2020	C	310	3065-2	3	Light Fraction	1			47	עירית צרת עלים/נבובה	Asphodelus tenuifolius/fistulosus	זרע	seed	עיריתיים	Asphodelaceae	1	כנראה צרת עלים. ראו מח' 2 עמ' 143
NZN-117	Nitzana	Tepper and Bar-Oz	דניאל	2017-2020	C	310	3065-2	3	Light Fraction	1			48	סלק?		זרע	seed	סילקיים?	Chenopodiaceae?	1
NZN-117	Nitzana	Tepper and Bar-Oz	דניאל	2017-2020	C	310	3065-2	3	Light Fraction	1			49	רצנטי?						1
NZN-117	Nitzana	Tepper and Bar-Oz	דניאל	2017-2020	C	310	3065-2	3	Light Fraction	1			50	חרק						1	אחד נזמית לופתת או חרק? כנראה חרק בגלל החור.
NZN-117	Nitzana	Tepper and Bar-Oz	דניאל	2017-2020	C	310	3065-2	3	Light Fraction	1			51	בלתי-שונות							לא נספר
NZN-117	Nitzana	Tepper and Bar-Oz	דניאל	2017-2020	C	310	3065-2	3	Light Fraction	0.5			52	פרפרני			seed?	פרפרניים	Fabaceae	1	לחבר ל73-45
NZN-117	Nitzana	Tepper and Bar-Oz	דניאל	2017-2020	C	310	3065-2	3	Light Fraction	0.5			53				culm node			1
NZN-117	Nitzana	Tepper and Bar-Oz	דניאל	2017-2020	C	310	3065-2	3	Light Fraction	0.5			54	דגני			rachis	דגניים	Gramineae	30
NZN-117	Nitzana	Tepper and Bar-Oz	דניאל	2017-2020	C	310	3065-2	3	Light Fraction	0.5			55	יבלית		זרע?				40
NZN-117	Nitzana	Tepper and Bar-Oz	דניאל	2017-2020	C	310	3065-2	3	Light Fraction	0.5			56	דגני				דגניים	Gramineae	5
NZN-117	Nitzana	Tepper and Bar-Oz	דניאל	2017-2020	C	310	3065-2	3	Light Fraction	0.5			57	שעורה שש-טורית			rachis?	דגניים	Gramineae	1
NZN-117	Nitzana	Tepper and Bar-Oz	דניאל	2017-2020	C	310	3065-2	3	Light Fraction	0.5			58	שברי מלען
NZN-117	Nitzana	Tepper and Bar-Oz	דניאל	2017-2020	C	310	3065-2	3	Light Fraction	0.5			59	תאנה		אגוזית?				13
NZN-117	Nitzana	Tepper and Bar-Oz	דניאל	2017-2020	C	310	3065-2	3	Light Fraction	0.5			60	חיטה/שעורה	Triticum/Hordeum			דגניים	Gramineae	5	עובר
NZN-117	Nitzana	Tepper and Bar-Oz	דניאל	2017-2020	C	310	3065-2	3	Light Fraction	0.5			61	דגני				דגניים	Gramineae	1	להגדרה
NZN-117	Nitzana	Tepper and Bar-Oz	דניאל	2017-2020	C	310	3065-2	3	Light Fraction	0.5			62	חיטה 4n			rachis	דגניים	Gramineae	2
NZN-117	Nitzana	Tepper and Bar-Oz	דניאל	2017-2020	C	310	3065-2	3	Light Fraction	0.5			63	תאנה?		אנדוספרם	endosperm			1
NZN-117	Nitzana	Tepper and Bar-Oz	דניאל	2017-2020	C	310	3065-2	3	Light Fraction	0.5			64	חלמית		זרע?				2	קצת כרקים/חדות-אונות
NZN-117	Nitzana	Tepper and Bar-Oz	דניאל	2017-2020	C	310	3065-2	3	Light Fraction	0.5			65	מתנן שעיר	Thymelaea hirsuta	עלה	leaf	מתנניים	Thymelaeaceae	48	לפי קצות עלה
NZN-117	Nitzana	Tepper and Bar-Oz	דניאל	2017-2020	C	310	3065-2	3	Light Fraction	0.5			66	חיעד ספרדי	Aizoon hispanicum	זרע?		חיעדיים	Aizoaceae	30
NZN-117	Nitzana	Tepper and Bar-Oz	דניאל	2017-2020	C	310	3065-2	3	Light Fraction	0.5			67	מתנן שעיר				מתננים		2	קצה ענף
NZN-117	Nitzana	Tepper and Bar-Oz	דניאל	2017-2020	C	310	3065-2	3	Light Fraction	0.5			68	רכפתני		זרע?				1
NZN-117	Nitzana	Tepper and Bar-Oz	דניאל	2017-2020	C	310	3065-2	3	Light Fraction	0.5			69	קוטנדיה?		זרע?				2
NZN-117	Nitzana	Tepper and Bar-Oz	דניאל	2017-2020	C	310	3065-2	3	Light Fraction	0.5			70	מורכבים		זרעון				2
NZN-117	Nitzana	Tepper and Bar-Oz	דניאל	2017-2020	C	310	3065-2	3	Light Fraction	0.5			71	אהל מצוי	Mesembryanthemum nodiflorum	זרע?		חיעדיים	Aizoaceae	20	כולל 3 מפוחם
NZN-117	Nitzana	Tepper and Bar-Oz	דניאל	2017-2020	C	310	3065-2	3	Light Fraction	0.5			72	לחך		זרע?				12
NZN-117	Nitzana	Tepper and Bar-Oz	דניאל	2017-2020	C	310	3065-2	3	Light Fraction	0.5			73	בלתי						6	לחבר בהמשך?
NZN-117	Nitzana	Tepper and Bar-Oz	דניאל	2017-2020	C	310	3065-2	3	Light Fraction	0.5			74	בלתי - שונות
NZN-117	Nitzana	Tepper and Bar-Oz	דניאל	2017-2020	C	310	3065-2	3	Light Fraction	0.5			75	גפן?	Vitis vinifera?	עוקץ	pedicel	גפניים	Vitaceae	1
NZN-117	Nitzana	Tepper and Bar-Oz	דניאל	2017-2020	C	310	3065-2	3	Light Fraction	0.5			76	מרגנית השדה		זרע?				1
NZN-117	Nitzana	Tepper and Bar-Oz	דניאל	2017-2020	C	310	3065-2	3	Light Fraction	0.5			77	בר-עכנא						1
NZN-117	Nitzana	Tepper and Bar-Oz	דניאל	2017-2020	C	310	3065-2	3	Light Fraction	0.5			78	חרק							לא מפוחם
NZN-117	Nitzana	Tepper and Bar-Oz	דניאל	2017-2020	C	310	3065-2	3	Light Fraction	0.5			79	כף - אווז האשפות		זרע?				4	אחד אבד במיון
NZN-117	Nitzana	Tepper and Bar-Oz	דניאל	2017-2020	C	310	3065-2	3	Light Fraction	0.5			80	בלתי
NZN-117	Nitzana	Tepper and Bar-Oz	דניאל	2017-2020	C	310	3065-2	3	Light Fraction	0.5			81	אשל הפרקים		זרע?				1
NZN-117	Nitzana	Tepper and Bar-Oz	דניאל	2017-2020	C	310	3065-2	3	Light Fraction	0.5			82	ששן מאפיר		זרע?				1	לוודא
NZN-117	Nitzana	Tepper and Bar-Oz	דניאל	2017-2020	C	310	3065-2	3	Light Fraction	0.5			83	ליואל
NZN-117	Nitzana	Tepper and Bar-Oz	דניאל	2017-2020	C	310	3065-2	3	Light Fraction	0.5			84	פרג/פרגה - ליואל		זרע?				1
NZN-117	Nitzana	Tepper and Bar-Oz	דניאל	2017-2020	C	310	3065-2	3	Light Fraction	0.5			85	ליואל - מורכבים		זרעון?				1
NZN-117	Nitzana	Tepper and Bar-Oz	דניאל	2017-2020	C	310	3065-2	3	Light Fraction	0.5			86	ליואל
NZN-117	Nitzana	Tepper and Bar-Oz	דניאל	2017-2020	C	310	3065-2	3	Light Fraction	0.5			87	שלוחית?		זרע?				1	קא ומעוגל
NZN-117	Nitzana	Tepper and Bar-Oz	דניאל	2017-2020	C	310	3065-2	3	Light Fraction	0.5			88	רכתה מגובששת		זרע?				1
NZN-117	Nitzana	Tepper and Bar-Oz	דניאל	2017-2020	C	310	3065-2	3	Light Fraction	0.5			89	ליואל -מבטיחות!!!
NZN-117	Nitzana	Tepper and Bar-Oz	דניאל	2017-2020	C	310	3065-2	3	Light Fraction	0.5			90	לחך?		זרע?				3
NZN-117	Nitzana	Tepper and Bar-Oz	דניאל	2017-2020	C	310	3065-2	3	Light Fraction	0.5			91	ליואל						2
NZN-117	Nitzana	Tepper and Bar-Oz	דניאל	2017-2020	C	310	3065-2	3	Light Fraction	0.5			92								7.5cc unchecked(of 13cc)
NZN-117	Nitzana	Tepper and Bar-Oz	דניאל	2017-2020	C	310	3065-2	3	Light Fraction	0.5			93								6cc checked
NZN-118	Nitzana	Tepper and Bar-Oz	דניאל	2017-2020	C	310	3065-2	3	Heavy Residue				1	שעורה	Hordeum vulgare	גרגיר	grain	דגניים	Gramineae	5
NZN-118	Nitzana	Tepper and Bar-Oz	דניאל	2017-2020	C	310	3065-2	3	Heavy Residue	2			2	גפן	Vitis vinifera	אנדוספרם	endosperm	גפניים	Vitaceae	1
NZN-118	Nitzana	Tepper and Bar-Oz	דניאל	2017-2020	C	310	3065-2	3	Heavy Residue	2			3	עדשה תרבותית	Lens culinaris	פסיג וזרע	seed and cotyledon	פרפרניים	Fabaceae	3	הרוב פסיגים
NZN-118	Nitzana	Tepper and Bar-Oz	דניאל	2017-2020	C	310	3065-2	3	Heavy Residue	2			4	בקיית הכרשינה	Vicia ervilia	פסיג וזרע	seed and cotyledon	פרפרניים	Fabaceae	2	ספירה לפי מס' מינימלי של זרעים, כמו תמיד
NZN-118	Nitzana	Tepper and Bar-Oz	דניאל	2017-2020	C	310	3065-2	3	Heavy Residue	2			5	בקיים	Vicieae	פסיג	cotyledon	פרפרניים	Fabaceae	1
NZN-118	Nitzana	Tepper and Bar-Oz	דניאל	2017-2020	C	310	3065-2	3	Heavy Residue	2			6	בלתי/שונות
NZN-118	Nitzana	Tepper and Bar-Oz	דניאל	2017-2020	C	310	3065-2	3	Heavy Residue	2			7	גללים? אפר?
NZN-118	Nitzana	Tepper and Bar-Oz	דניאל	2017-2020	C	310	3065-2	3	Heavy Residue	2			8	שברי דגן
NZN-119	Nitzana	Tepper and Bar-Oz	דניאל	2017-2020	C	310	3080-1	3	Light Fraction	2			1	שעורה	Hordeum vulgare	גרגיר	grain	דגניים	Gramineae	2
NZN-119	Nitzana	Tepper and Bar-Oz	דניאל	2017-2020	C	310	3080-1	3	Light Fraction	2			2	שברי דגן
NZN-119	Nitzana	Tepper and Bar-Oz	דניאל	2017-2020	C	310	3080-1	3	Light Fraction	2			3	בלתי							לא להתעסק
NZN-120	Nitzana	Tepper and Bar-Oz	דניאל	2017-2020	C	310	3080-1	3	Heavy Residue	2			1	בלתי-שונות
NZN-121	Nitzana	Tepper and Bar-Oz	דניאל	2017-2020	C	311	3048	3	Light Fraction	2			1	שעורה	Hordeum vulgare	גרגיר	grain	דגניים	Gramineae	6
NZN-121	Nitzana	Tepper and Bar-Oz	דניאל	2017-2020	C	311	3048	3	Light Fraction	2			2	חיטה	Triticum	גרגיר	grain	דגניים	Gramineae	1
NZN-121	Nitzana	Tepper and Bar-Oz	דניאל	2017-2020	C	311	3048	3	Light Fraction	2			3	חיטה/שעורה	Hordeum/Triticum	גרגיר	grain	דגניים	Gramineae	4	ועוד שברים
NZN-121	Nitzana	Tepper and Bar-Oz	דניאל	2017-2020	C	311	3048	3	Light Fraction	2			4	cf. חיטה/שעורה	cf. Hordeum/Triticum	פרקי גבעול	culm nodes	דגניים	Gramineae	4
NZN-121	Nitzana	Tepper and Bar-Oz	דניאל	2017-2020	C	311	3048	3	Light Fraction	2			5	בקיית הכרשינה	Vicia ervilia	פסיג	cotyledon	פרפרניים	Fabaceae	1
NZN-121	Nitzana	Tepper and Bar-Oz	דניאל	2017-2020	C	311	3048	3	Light Fraction	2			6	cf. חיטה/שעורה	cf. Hordeum/Triticum	שרשי דגן	roots	דגניים	Gramineae	1
NZN-121	Nitzana	Tepper and Bar-Oz	דניאל	2017-2020	C	311	3048	3	Light Fraction	2			7	אשל רצנטי
NZN-121	Nitzana	Tepper and Bar-Oz	דניאל	2017-2020	C	311	3048	3	Light Fraction	2			8	בלתי-שונות
NZN-122	Nitzana	Tepper and Bar-Oz	דניאל	2017-2020	C	311	3048	3	Heavy Residue	2		1	1	?שעורה	cf. Hordeum vulgare	גרגיר	grain	דגניים	Gramineae	1
NZN-122	Nitzana	Tepper and Bar-Oz	דניאל	2017-2020	C	311	3048	3	Heavy Residue	2		1	2	חיטה/שעורה	Hordeum/Triticum	שבר גרגיר	grain fragment	דגניים	Gramineae
NZN-122	Nitzana	Tepper and Bar-Oz	דניאל	2017-2020	C	311	3048	3	Heavy Residue	2		7	3	בלתי-שונות
NZN-123	Nitzana	Tepper and Bar-Oz	דניאל	2017-2020	C	312	3046-1	3	Light Fraction	2			1	שעורה	Hordeum vulgare	גרגיר	grain	דגניים	Gramineae	9
NZN-123	Nitzana	Tepper and Bar-Oz	דניאל	2017-2020	C	312	3046-1	3	Light Fraction	2			2	חיטה/שעורה	Hordeum/Triticum	גרגיר	grain	דגניים	Gramineae	4
NZN-123	Nitzana	Tepper and Bar-Oz	דניאל	2017-2020	C	312	3046-1	3	Light Fraction	2			3	cf. חיטה/שעורה	cf. Hordeum/Triticum	שרשי דגן	roots	דגניים	Gramineae	2
NZN-123	Nitzana	Tepper and Bar-Oz	דניאל	2017-2020	C	312	3046-1	3	Light Fraction	2			4	תמר מצוי	Phoenix dactylifera	גלעין	stone	דקליים	Palmae	1
NZN-123	Nitzana	Tepper and Bar-Oz	דניאל	2017-2020	C	312	3046-1	3	Light Fraction	2			5	גלל		גלל שלם				1	נראה של צאן
NZN-123	Nitzana	Tepper and Bar-Oz	דניאל	2017-2020	C	312	3046-1	3	Light Fraction	2			6	בלתי-שונות
NZN-123	Nitzana	Tepper and Bar-Oz	דניאל	2017-2020	C	312	3046-1	3	Light Fraction	1			7	גפן	Vitis vinifera	עוקץ חרצן	pip	גפניים	Vitaceae	1
NZN-123	Nitzana	Tepper and Bar-Oz	דניאל	2017-2020	C	312	3046-1	3	Light Fraction	1			8	שעורה שש-טורית	Hordeum vulgare hexastichum	פרק ציר שיבולת	rachis fragment	דגניים	Gramineae	10	אחד עם 3 פרקים
NZN-123	Nitzana	Tepper and Bar-Oz	דניאל	2017-2020	C	312	3046-1	3	Light Fraction	1			9	שעורה דו-טורית/התבור	Hordeum vulgare disticum/spontaneum	פרק ציר שיבולת	rachis fragments	דגניים	Graminae	1
NZN-123	Nitzana	Tepper and Bar-Oz	דניאל	2017-2020	C	312	3046-1	3	Light Fraction	1			10	שעורה	Hordeum	פרק ראשון ופרק ציר שיבולת	first rachis&rachis fragment	דגניים	Graminae	2	שני פרקים בסך הכל
NZN-123	Nitzana	Tepper and Bar-Oz	דניאל	2017-2020	C	312	3046-1	3	Light Fraction	1			11	שעורה	Hordeum	?	?	דגניים	Graminae	2
NZN-123	Nitzana	Tepper and Bar-Oz	דניאל	2017-2020	C	312	3046-1	3	Light Fraction	1			12	חיטה טטרפלוידית	Triticum turgidum s.l.	פרק ציר שיבולת	rachis fragment	דגניים	Graminae	5
NZN-123	Nitzana	Tepper and Bar-Oz	דניאל	2017-2020	C	312	3046-1	3	Light Fraction	1			13	חיטה/שעורה	Hordeum/Triticum	פרק ציר שיבולת	rachis fragment	דגניים	Gramineae	6
NZN-123	Nitzana	Tepper and Bar-Oz	דניאל	2017-2020	C	312	3046-1	3	Light Fraction	1			14	חיטה/שעורה	Hordeum/Triticum	צאוורון	collar	דגניים	Gramineae	1
NZN-123	Nitzana	Tepper and Bar-Oz	דניאל	2017-2020	C	312	3046-1	3	Light Fraction	1			15	חיטה/שעורה	Hordeum/Triticum	פרקי גבעול	culm node	דגניים	Gramineae	8
NZN-123	Nitzana	Tepper and Bar-Oz	דניאל	2017-2020	C	312	3046-1	3	Light Fraction	1			16	יבלית מצויה בגלל	Cynodon dactylon	גרגיר בגלל	grain in dung	דגניים	Gramineae	1
NZN-123	Nitzana	Tepper and Bar-Oz	דניאל	2017-2020	C	312	3046-1	3	Light Fraction	1			17	שברי דגן		גרגיר	grain	דגניים	Gramineae		לא נספר
NZN-123	Nitzana	Tepper and Bar-Oz	דניאל	2017-2020	C	312	3046-1	3	Light Fraction	1			18	דגני	Gramineae	פרק ציר שיבולת	rachis fragment	דגניים	Gramineae	7
NZN-123	Nitzana	Tepper and Bar-Oz	דניאל	2017-2020	C	312	3046-1	3	Light Fraction	1			19	דגני	Gramineae	שברי מלען	awn fragment	דגניים	Gramineae	2	אחד מחובר לחתיכת גלומה
NZN-123	Nitzana	Tepper and Bar-Oz	דניאל	2017-2020	C	312	3046-1	3	Light Fraction	1			20	פיקוס התאנה	Ficus carica	אגוזית	nutlet	תותיים	Moraceae	1
NZN-123	Nitzana	Tepper and Bar-Oz	דניאל	2017-2020	C	312	3046-1	3	Light Fraction	1			21	מתנן שעיר	Thymelaea hirsuta	פרי	fruit	מתנניים	Thymelaeaceae	2
NZN-123	Nitzana	Tepper and Bar-Oz	דניאל	2017-2020	C	312	3046-1	3	Light Fraction	1			22	מתנן שעיר	Thymelaea hirsuta	ניצן/קצה ענף	bud	מתנניים	Thymelaeaceae	1
NZN-123	Nitzana	Tepper and Bar-Oz	דניאל	2017-2020	C	312	3046-1	3	Light Fraction	1			23	פרפרני קטן	small-seeded legume	זרע	seed	פרפרניים	Fabaceae	1
NZN-123	Nitzana	Tepper and Bar-Oz	דניאל	2017-2020	C	312	3046-1	3	Light Fraction	1			24	בלתי		קנה שורש	roots			1	חד-פסיגיים
NZN-123	Nitzana	Tepper and Bar-Oz	דניאל	2017-2020	C	312	3046-1	3	Light Fraction	1			25	גלעינון החוף	Moltkiopsis ciliata	זרע	seed	זיפניים	Boraginaceae	1
NZN-123	Nitzana	Tepper and Bar-Oz	דניאל	2017-2020	C	312	3046-1	3	Light Fraction	1			26	בלתי- גלל מכרסם?						4	לא להתעסק בינתיים גבשושיות לא ברור
NZN-123	Nitzana	Tepper and Bar-Oz	דניאל	2017-2020	C	312	3046-1	3	Light Fraction	1			27	בלתי-שונות							לא נספר
NZN-123	Nitzana	Tepper and Bar-Oz	דניאל	2017-2020	C	312	3046-1	3	Light Fraction	0.5			28	חיטה 4n	Triticum turgidum s.l.?	גרגיר	grain	דגניים	Gramineae	1
NZN-123	Nitzana	Tepper and Bar-Oz	דניאל	2017-2020	C	312	3046-1	3	Light Fraction	0.5			29				culm node			1
NZN-123	Nitzana	Tepper and Bar-Oz	דניאל	2017-2020	C	312	3046-1	3	Light Fraction	0.5			30	שעורה שש-טורית		גרגיר	grain	דגניים	Gramineae	5
NZN-123	Nitzana	Tepper and Bar-Oz	דניאל	2017-2020	C	312	3046-1	3	Light Fraction	0.5			31	שעורה	Hordeum	גרגיר	grain	דגניים	Gramineae	6
NZN-123	Nitzana	Tepper and Bar-Oz	דניאל	2017-2020	C	312	3046-1	3	Light Fraction	0.5			32	שפתני		זרע?		שפתניים	Labiatae	1
NZN-123	Nitzana	Tepper and Bar-Oz	דניאל	2017-2020	C	312	3046-1	3	Light Fraction	0.5			33				1st rachis			1
NZN-123	Nitzana	Tepper and Bar-Oz	דניאל	2017-2020	C	312	3046-1	3	Light Fraction	0.5			34				rachis			23
NZN-123	Nitzana	Tepper and Bar-Oz	דניאל	2017-2020	C	312	3046-1	3	Light Fraction	0.5			35			פרק קצה				1
NZN-123	Nitzana	Tepper and Bar-Oz	דניאל	2017-2020	C	312	3046-1	3	Light Fraction	0.5			36				collar			1
NZN-123	Nitzana	Tepper and Bar-Oz	דניאל	2017-2020	C	312	3046-1	3	Light Fraction	0.5			37	בלתי	Salsoleae Trifolium					1	נבדקו וגם
NZN-123	Nitzana	Tepper and Bar-Oz	דניאל	2017-2020	C	312	3046-1	3	Light Fraction	0.5			38	רכפה ערבית	Reseda arabica	זרע?				1
NZN-123	Nitzana	Tepper and Bar-Oz	דניאל	2017-2020	C	312	3046-1	3	Light Fraction	0.5			39	אשל?	Tamarix aphylla?	זרע?		אשליים?	Tamaricaceae	1
NZN-123	Nitzana	Tepper and Bar-Oz	דניאל	2017-2020	C	312	3046-1	3	Light Fraction	0.5			40	חיעד ספרדי	Aizoon hispanicum	זרע?		חיעדיים	Aizoaceae	1	לבדיקה
NZN-123	Nitzana	Tepper and Bar-Oz	דניאל	2017-2020	C	312	3046-1	3	Light Fraction	0.5			41	ליואל??						1	תודרה סיגית/מזרחית
NZN-123	Nitzana	Tepper and Bar-Oz	דניאל	2017-2020	C	312	3046-1	3	Light Fraction	0.5			42	חלמית	cf. Malva	זרע?	seed?	חלמיתיים	Malvaceae	1
NZN-123	Nitzana	Tepper and Bar-Oz	דניאל	2017-2020	C	312	3046-1	3	Light Fraction	0.5			43	מצליב		עוקץ	pedicel	מצליבים	Brassicaceae	1
NZN-123	Nitzana	Tepper and Bar-Oz	דניאל	2017-2020	C	312	3046-1	3	Light Fraction	0.5			44	דגני		שבר מלען		דגניים	Gramineae
NZN-123	Nitzana	Tepper and Bar-Oz	דניאל	2017-2020	C	312	3046-1	3	Light Fraction	0.5			45	תאנה	Ficus carica	אגוזית	nutlet	תותיים	Moraceae	5
NZN-123	Nitzana	Tepper and Bar-Oz	דניאל	2017-2020	C	312	3046-1	3	Light Fraction	0.5			46	קוטנדיה?	cf. Cutandia dichtoma	זרע?		דגניים	Gramineae	1	? בסוף
NZN-123	Nitzana	Tepper and Bar-Oz	דניאל	2017-2020	C	312	3046-1	3	Light Fraction	0.5			47	ארנבית שרועה	Arnebia decumbrens	?זרע	seed	זיפניים	Boraginaceae	2
NZN-123	Nitzana	Tepper and Bar-Oz	דניאל	2017-2020	C	312	3046-1	3	Light Fraction	0.5			48	אהל מצוי	Mesembryanthemum nodiflorum	?זרע		חיעדיים	Aizoaceae	22
NZN-123	Nitzana	Tepper and Bar-Oz	דניאל	2017-2020	C	312	3046-1	3	Light Fraction	0.5			49	לחך	Plantago sp.	?זרע	seed?	לחכיים	Plantaginaceae	3
NZN-123	Nitzana	Tepper and Bar-Oz	דניאל	2017-2020	C	312	3046-1	3	Light Fraction	0.5			50	חפורית קטנה	Phalaris?	?זרע		דגניים	Gramineae	4
NZN-123	Nitzana	Tepper and Bar-Oz	דניאל	2017-2020	C	312	3046-1	3	Light Fraction	0.5			51	דגני - יבלית	Cynodon dactylon	?גרגיר	grain?	דגניים	Gramineae	11
NZN-123	Nitzana	Tepper and Bar-Oz	דניאל	2017-2020	C	312	3046-1	3	Light Fraction	0.5			52	בלתי -שונות
NZN-123	Nitzana	Tepper and Bar-Oz	דניאל	2017-2020	C	312	3046-1	3	Light Fraction	0.5			53	מרגנית? שלוחית?		זרע?		חלבלוביים	Euphorbiaceae	1
NZN-123	Nitzana	Tepper and Bar-Oz	דניאל	2017-2020	C	312	3046-1	3	Light Fraction	0.5			54	כף - אווז	Chenopodium murale/ Chenopodium sp.*	זרע?		סלקיים	Chenopodiaceae	3
NZN-123	Nitzana	Tepper and Bar-Oz	דניאל	2017-2020	C	312	3046-1	3	Light Fraction	0.5			55	מתנן שעיר	Thymelaea hirsuta	עלה		מתנניים	Thymeleaeceae	4
NZN-123	Nitzana	Tepper and Bar-Oz	דניאל	2017-2020	C	312	3046-1	3	Light Fraction	0.5			56	אשליל?	Reaumuria sp.?	ניצן של ענף?	bud?	אשליים	Tamaricaceae	1
NZN-123	Nitzana	Tepper and Bar-Oz	דניאל	2017-2020	C	312	3046-1	3	Light Fraction	0.5			57	בן - שלח - מקור	Erucaria microcarpa?	זרע?		מצליבים	Brassicaceae	1
NZN-123	Nitzana	Tepper and Bar-Oz	דניאל	2017-2020	C	312	3046-1	3	Light Fraction	0.5			58	?							2cc, נבדק
NZN-124	Nitzana	Tepper and Bar-Oz	דניאל	2017-2020	C	312	3046-1	3	Heavy Residue	2			1	חיטה/שעורה	Hordeum/Triticum	גרגיר	grain	דגניים	Gramineae	1
NZN-124	Nitzana	Tepper and Bar-Oz	דניאל	2017-2020	C	312	3046-1	3	Heavy Residue	2			2	חיטה/שעורה	Hordeum/Triticum	שבר גרגיר	grain fragment	דגניים	Gramineae
NZN-124	Nitzana	Tepper and Bar-Oz	דניאל	2017-2020	C	312	3046-1	3	Heavy Residue	2			3	בלתי							תמר - שברי גלעין -?
NZN-124	Nitzana	Tepper and Bar-Oz	דניאל	2017-2020	C	312	3046-1	3	Heavy Residue	2			4	טיח?
NZN-125	Nitzana	Tepper and Bar-Oz	דניאל	2017-2020	C	312	3067-2	3	Light Fraction	2			1	שעורה	Hordeum vulgare	גרגיר	grain	דגניים	Gramineae	8
NZN-125	Nitzana	Tepper and Bar-Oz	דניאל	2017-2020	C	312	3067-2	3	Light Fraction	2			2	חיטה	Triticum	גרגיר	grain	דגניים	Gramineae	1
NZN-125	Nitzana	Tepper and Bar-Oz	דניאל	2017-2020	C	312	3067-2	3	Light Fraction	2			3	חיטה/שעורה	Hordeum/Triticum	גרגיר	grain	דגניים	Gramineae	5	יש גם שברי גרגיר בפנים
NZN-125	Nitzana	Tepper and Bar-Oz	דניאל	2017-2020	C	312	3067-2	3	Light Fraction	2			4	גפן	Vitis vinifera	עוקץ חרצן	pip	גפניים	Vitaceae	1
NZN-125	Nitzana	Tepper and Bar-Oz	דניאל	2017-2020	C	312	3067-2	3	Light Fraction	2			5	cf. חיטה/שעורה	cf. Hordeum/Triticum	פרקי גבעול	culm nodes	דגניים	Gramineae	2
NZN-125	Nitzana	Tepper and Bar-Oz	דניאל	2017-2020	C	312	3067-2	3	Light Fraction	2			6	קטנית קטנה ועגולה	Vicieae?	זרע	seed	פרפרניים	Fabaceae	1	קטנית קטנה ועגולה, לחבר בהמשך
NZN-125	Nitzana	Tepper and Bar-Oz	דניאל	2017-2020	C	312	3067-2	3	Light Fraction	2			7	בלתי						1	לחבר בהמשך. כדורי. אוילי קטנית?
NZN-125	Nitzana	Tepper and Bar-Oz	דניאל	2017-2020	C	312	3067-2	3	Light Fraction	2			8	בלתי						1	לא להתעסק
NZN-126	Nitzana	Tepper and Bar-Oz	דניאל	2017-2020	C	312	3067-2	3	Heavy Residue	2			1	חיטה/שעורה	Hordeum/Triticum	גרגיר	grain	דגניים	Gramineae	1
NZN-126	Nitzana	Tepper and Bar-Oz	דניאל	2017-2020	C	312	3067-2	3	Heavy Residue	2			2	בקיי	Vicieae	זרע	seed	פרפרניים	Fabaceae	1	לא להתעסק
NZN-126	Nitzana	Tepper and Bar-Oz	דניאל	2017-2020	C	312	3067-2	3	Heavy Residue	2			3	תמר מצוי	Phoenix dactylifera	גלעין	stone	דקליים	Palmae	1	בכמה שברים
NZN-126	Nitzana	Tepper and Bar-Oz	דניאל	2017-2020	C	312	3067-2	3	Heavy Residue	2			4	בלתי						1	חרקי
NZN-126	Nitzana	Tepper and Bar-Oz	דניאל	2017-2020	C	312	3067-2	3	Heavy Residue	2			5	בלתי-שונות							לא להתעסק
NZN-126	Nitzana	Tepper and Bar-Oz	דניאל	2017-2020	C	312	3067-2	3	Heavy Residue	2			6	טיח?
NZN-127	Nitzana	Tepper and Bar-Oz	דניאל	2017-2020	C	312	3068-2	3	Light Fraction	2			1	שעורה	Hordeum vulgare	גרגיר	grain	דגניים	Gramineae	27
NZN-127	Nitzana	Tepper and Bar-Oz	דניאל	2017-2020	C	312	3068-2	3	Light Fraction	2			2	חיטה/שעורה	Hordeum/Triticum	גרגיר	grain	דגניים	Gramineae	20
NZN-127	Nitzana	Tepper and Bar-Oz	דניאל	2017-2020	C	312	3068-2	3	Light Fraction	2			3	גפן	Vitis vinifera	עוקץ חרצן	pip	גפניים	Vitaceae	1
NZN-127	Nitzana	Tepper and Bar-Oz	דניאל	2017-2020	C	312	3068-2	3	Light Fraction	2			4	cf. חיטה/שעורה	cf. Hordeum/Triticum	פרקי גבעול	culm nodes	דגניים	Gramineae	4
NZN-127	Nitzana	Tepper and Bar-Oz	דניאל	2017-2020	C	312	3068-2	3	Light Fraction	2			5	תמר מצוי	Phoenix dactylifera	גלעין	stone	דקליים	Palmae	1	לא גלעין שלם
NZN-127	Nitzana	Tepper and Bar-Oz	דניאל	2017-2020	C	312	3068-2	3	Light Fraction	2			6	חיטה/שעורה	Hordeum/Triticum	שבר גרגיר	grain fragment	דגניים	Gramineae
NZN-127	Nitzana	Tepper and Bar-Oz	דניאל	2017-2020	C	312	3068-2	3	Light Fraction	2			7	בלתי-שונות
NZN-127	Nitzana	Tepper and Bar-Oz	דניאל	2017-2020	C	312	3068-2	3	Light Fraction	2			8	שעורה	Hordeum sp.	גרגיר	grain	דגניים	Gramineae	3
NZN-127	Nitzana	Tepper and Bar-Oz	דניאל	2017-2020	C	312	3068-2	3	Light Fraction	1			9	חיטה/שעורה	Hordeum/Triticum	גרגיר	grain	דגניים	Gramineae	20
NZN-127	Nitzana	Tepper and Bar-Oz	דניאל	2017-2020	C	312	3068-2	3	Light Fraction	1			10	חיטה/שעורה	Hordeum/Triticum	שבר גרגיר	grain fragment	דגניים	Gramineae
NZN-127	Nitzana	Tepper and Bar-Oz	דניאל	2017-2020	C	312	3068-2	3	Light Fraction	1			11	שעורה שש-טורית	Hordeum vulgare subsp. hexastichum	פרק ציר שיבולת	rachis fragments	דגניים	Gramineae	23	כולל אחד עם 2פרקים ששווה צילום
NZN-127	Nitzana	Tepper and Bar-Oz	דניאל	2017-2020	C	312	3068-2	3	Light Fraction	1			12	שעורה	Hordeum vulgare	פרק ראשון	first rachis	דגניים	Gramineae	1
NZN-127	Nitzana	Tepper and Bar-Oz	דניאל	2017-2020	C	312	3068-2	3	Light Fraction	1			13	חיטה טטרפלוידית	Triticum turgidum s.l.	פרק ציר שיבולת	rachis fragments	דגניים	Gramineae	6
NZN-127	Nitzana	Tepper and Bar-Oz	דניאל	2017-2020	C	312	3068-2	3	Light Fraction	1			14	חיטה/שעורה	Hordeum/Triticum	פרק ציר שיבולת	rachis fragments	דגניים	Gramineae	8
NZN-127	Nitzana	Tepper and Bar-Oz	דניאל	2017-2020	C	312	3068-2	3	Light Fraction	1			15	חיטה/שעורה	Hordeum/Triticum	צווארון	collar	דגניים	Gramineae	1
NZN-127	Nitzana	Tepper and Bar-Oz	דניאל	2017-2020	C	312	3068-2	3	Light Fraction	1			16	cf. חיטה/שעורה	cf. Hordeum/Triticum	פרקי גבעול	culm nodes	דגניים	Gramineae	15
NZN-127	Nitzana	Tepper and Bar-Oz	דניאל	2017-2020	C	312	3068-2	3	Light Fraction	1			17	זון	Lolium sp.	גרגיר	grain	דגניים	Gramineae	1
NZN-127	Nitzana	Tepper and Bar-Oz	דניאל	2017-2020	C	312	3068-2	3	Light Fraction	1			18	חפורית קטנה? להגדרה	Phalaris minor?	גרגיר	grain	דגניים	Gramineae	2
NZN-127	Nitzana	Tepper and Bar-Oz	דניאל	2017-2020	C	312	3068-2	3	Light Fraction	1			19	דגני טיפוס עוקצר	Brachypodium type	גרגיר	grain	דגניים	Gramineae	3
NZN-127	Nitzana	Tepper and Bar-Oz	דניאל	2017-2020	C	312	3068-2	3	Light Fraction	1			20	דגני	Gramineae	גרגיר	grain	דגניים	Gramineae	2
NZN-127	Nitzana	Tepper and Bar-Oz	דניאל	2017-2020	C	312	3068-2	3	Light Fraction	1			21	עדשה תרבותית	Lens culinaris	זרע	seed	פרפרניים	Fabaceae	1
NZN-127	Nitzana	Tepper and Bar-Oz	דניאל	2017-2020	C	312	3068-2	3	Light Fraction	1			22	גרגרנית ערבית	Trigonella arabica	זרע	seed	פרפרניים	Fabaceae	6
NZN-127	Nitzana	Tepper and Bar-Oz	דניאל	2017-2020	C	312	3068-2	3	Light Fraction	1			23	בקיים	Vicieae	פסיג	cotyledon	פרפרניים	Fabaceae	3
NZN-127	Nitzana	Tepper and Bar-Oz	דניאל	2017-2020	C	312	3068-2	3	Light Fraction	1			24	cf. אספסת מצויה	cf. Medicago polymorpha	זרע	seed	פרפרניים	Fabaceae	1	צריך לפסול הרמטית את אספסת הים וא. תרבותית. ראה עמ' 144 במחברת 2
NZN-127	Nitzana	Tepper and Bar-Oz	דניאל	2017-2020	C	312	3068-2	3	Light Fraction	1			25	בר עכנאי שיחני	Echiochilon fruticosum	זרע	seed	זיפניים	Boraginaceae	2
NZN-127	Nitzana	Tepper and Bar-Oz	דניאל	2017-2020	C	312	3068-2	3	Light Fraction	1			26	מתנן שעיר	Thymelaea hirsuta	פרי	fruit	מתנניים	Thymelaeaceae	1
NZN-127	Nitzana	Tepper and Bar-Oz	דניאל	2017-2020	C	312	3068-2	3	Light Fraction	1			27	ארנבית שרועה	Arnebia decumbrens	זרע	seed	זיפניים	Boraginaceae	3
NZN-127	Nitzana	Tepper and Bar-Oz	דניאל	2017-2020	C	312	3068-2	3	Light Fraction	1			28	דבקה	Galium sp.	פרודה	mericarp	פואתיים	Rubiaceae	1
NZN-127	Nitzana	Tepper and Bar-Oz	דניאל	2017-2020	C	312	3068-2	3	Light Fraction	1			29	cf. בקבוקון מקומט	cf. Rapistrum rugosum	פרק עליון	siliqua fragment	מצילבים?	Brassicaceae	1	לפרק לוענית מצויה משקיות איסוף
NZN-127	Nitzana	Tepper and Bar-Oz	דניאל	2017-2020	C	312	3068-2	3	Light Fraction	1			30	חלמית- רצנטי?	Malva- recent?	פרודה	mericarp	חלמתיים	Malvaceae	1
NZN-127	Nitzana	Tepper and Bar-Oz	דניאל	2017-2020	C	312	3068-2	3	Light Fraction	1			31	בלתי		זרע	seed			1
NZN-127	Nitzana	Tepper and Bar-Oz	דניאל	2017-2020	C	312	3068-2	3	Light Fraction	1			32	בלתי		זרע	seed			1
NZN-127	Nitzana	Tepper and Bar-Oz	דניאל	2017-2020	C	312	3068-2	3	Light Fraction	1			33	קינואה רצנטי	quinoa recent	זרע	seed	ירבוזיים	Amaranthaceae	32	לא היה בדגימה. דניאל הוסיף את הקינואה בשביל לבדוק עניין מסויים
NZN-127	Nitzana	Tepper and Bar-Oz	דניאל	2017-2020	C	312	3068-2	3	Light Fraction	1			34	גלל-שבר						1
NZN-127	Nitzana	Tepper and Bar-Oz	דניאל	2017-2020	C	312	3068-2	3	Light Fraction	1			35	חרק מפוחם						1
NZN-127	Nitzana	Tepper and Bar-Oz	דניאל	2017-2020	C	312	3068-2	3	Light Fraction	1			36	בלתי-שונות							לא נספר. לבדוק שוב בהמשך
NZN-127	Nitzana	Tepper and Bar-Oz	דניאל	2017-2020	C	312	3068-2	3	Light Fraction	0.5			37	חלמית?	Malva sp.?	זרע?	seed?	חלמתיים	Malvaceae	5
NZN-127	Nitzana	Tepper and Bar-Oz	דניאל	2017-2020	C	312	3068-2	3	Light Fraction	0.5			38	פרפרני קטן		זרע?	seed?	פרפרניים	Fabaceae	4
NZN-127	Nitzana	Tepper and Bar-Oz	דניאל	2017-2020	C	312	3068-2	3	Light Fraction	0.5			39	שונות - ליואל
NZN-127	Nitzana	Tepper and Bar-Oz	דניאל	2017-2020	C	312	3068-2	3	Light Fraction	0.5			40	ציפרנית?		זרע?				2
NZN-127	Nitzana	Tepper and Bar-Oz	דניאל	2017-2020	C	312	3068-2	3	Light Fraction	0.5			41	ליואל - רכפה מגוגששת?						1	עמ' 137
NZN-127	Nitzana	Tepper and Bar-Oz	דניאל	2017-2020	C	312	3068-2	3	Light Fraction	0.5			42	ליואל						1
NZN-127	Nitzana	Tepper and Bar-Oz	דניאל	2017-2020	C	312	3068-2	3	Light Fraction	0.5			43	מורכבים - ליואל		זרעון				2
NZN-127	Nitzana	Tepper and Bar-Oz	דניאל	2017-2020	C	312	3068-2	3	Light Fraction	0.5			44	חלמית קטנת-פרחים/חדת-אונות		זרע?		חלמתיים	Malvaceae	1
NZN-127	Nitzana	Tepper and Bar-Oz	דניאל	2017-2020	C	312	3068-2	3	Light Fraction	0.5			45	תאנה	Ficus carica	אגוזית				15
NZN-127	Nitzana	Tepper and Bar-Oz	דניאל	2017-2020	C	312	3068-2	3	Light Fraction	0.5			46	גרגרנית? ערבית?		זרע?				1	השווה NZN 73-45
NZN-127	Nitzana	Tepper and Bar-Oz	דניאל	2017-2020	C	312	3068-2	3	Light Fraction	0.5			47	שלוחית		זרע?				1
NZN-127	Nitzana	Tepper and Bar-Oz	דניאל	2017-2020	C	312	3068-2	3	Light Fraction	0.5			48	מתנן שעיר	Thymelaea hirsuta	עלה	leaf	מתנניים	Thymelaeaceae	5
NZN-127	Nitzana	Tepper and Bar-Oz	דניאל	2017-2020	C	312	3068-2	3	Light Fraction	0.5			49	בן - שלח - מקור		זרע?				6
NZN-127	Nitzana	Tepper and Bar-Oz	דניאל	2017-2020	C	312	3068-2	3	Light Fraction	0.5			50	לחך	Plantago sp.	זרע?		לחכיים	Plantaginaceae	3
NZN-127	Nitzana	Tepper and Bar-Oz	דניאל	2017-2020	C	312	3068-2	3	Light Fraction	0.5			51	אהל מצוי	Mesembryanthemum nodiflorum	?זרע		חיעדיים	Aizoaceae	3	מפוחם ולא
NZN-127	Nitzana	Tepper and Bar-Oz	דניאל	2017-2020	C	312	3068-2	3	Light Fraction	0.5			52	מצליב		עוקץ		מצליביים	Brassicaceae	3
NZN-127	Nitzana	Tepper and Bar-Oz	דניאל	2017-2020	C	312	3068-2	3	Light Fraction	0.5			53	אשל?		זרע?				1
NZN-127	Nitzana	Tepper and Bar-Oz	דניאל	2017-2020	C	312	3068-2	3	Light Fraction	0.5			54	כף - אווז	Chenopodium murale/ Chenopodium sp.*	זרע?		סלקיים	Chenopodiaceae	1
NZN-127	Nitzana	Tepper and Bar-Oz	דניאל	2017-2020	C	312	3068-2	3	Light Fraction	0.5			55	דגני		גרגיר?		דגניים	Gramineae	1
NZN-127	Nitzana	Tepper and Bar-Oz	דניאל	2017-2020	C	312	3068-2	3	Light Fraction	0.5			56	קוטנדיה?	cf. Cutandia dichtoma	גרגיר?		דגניים	Gramineae	1
NZN-127	Nitzana	Tepper and Bar-Oz	דניאל	2017-2020	C	312	3068-2	3	Light Fraction	0.5			57	חפורית קטנה	Phalaris?	גרגיר?		דגניים	Gramineae	3
NZN-127	Nitzana	Tepper and Bar-Oz	דניאל	2017-2020	C	312	3068-2	3	Light Fraction	0.5			58	חיטה/שעורה	Hordeum/Triticum	גרגיר	grain	דגניים	Gramineae	14	עוברים
NZN-127	Nitzana	Tepper and Bar-Oz	דניאל	2017-2020	C	312	3068-2	3	Light Fraction	0.5			59				collar?			1
NZN-127	Nitzana	Tepper and Bar-Oz	דניאל	2017-2020	C	312	3068-2	3	Light Fraction	0.5			60	פרק ציר שיבולת		פרק ציר שיבולת		דגניים	Gramineae	84
NZN-127	Nitzana	Tepper and Bar-Oz	דניאל	2017-2020	C	312	3068-2	3	Light Fraction	0.5			61	חיטה	Triticum	גרגיר	grain	דגניים	Gramineae	1
NZN-127	Nitzana	Tepper and Bar-Oz	דניאל	2017-2020	C	312	3068-2	3	Light Fraction	0.5			62	חיטה 4n	Triticum turgidum s.l.?	גרגיר	grain	דגניים	Gramineae	3
NZN-127	Nitzana	Tepper and Bar-Oz	דניאל	2017-2020	C	312	3068-2	3	Light Fraction	0.5			63	תלתן	Trifolium sp.	זרע?		פרפרניים	Fabaceae	1	להגדרה
NZN-127	Nitzana	Tepper and Bar-Oz	דניאל	2017-2020	C	312	3068-2	3	Light Fraction	0.5			64	יבלית	Cynodon dactylon	?גרגיר	grain?	דגניים	Gramineae	10
NZN-127	Nitzana	Tepper and Bar-Oz	דניאל	2017-2020	C	312	3068-2	3	Light Fraction	0.5			65	דגני		גרגיר	grain	דגניים	Gramineae	2	לא להתעסק
NZN-127	Nitzana	Tepper and Bar-Oz	דניאל	2017-2020	C	312	3068-2	3	Light Fraction	0.5			66	?			culm node			5
NZN-127	Nitzana	Tepper and Bar-Oz	דניאל	2017-2020	C	312	3068-2	3	Light Fraction	0.5			67	דגני		גרגיר	grain	דגניים	Gramineae	1
NZN-127	Nitzana	Tepper and Bar-Oz	דניאל	2017-2020	C	312	3068-2	3	Light Fraction	0.5			68	שעורה שש-טורית	Hordeum ?	גרגיר	grain	דגניים	Gramineae	12
NZN-127	Nitzana	Tepper and Bar-Oz	דניאל	2017-2020	C	312	3068-2	3	Light Fraction	0.5			69	שברי מלען		שברי מלען
NZN-127	Nitzana	Tepper and Bar-Oz	דניאל	2017-2020	C	312	3068-2	3	Light Fraction	0.5			70	בלתי - שונות
NZN-127	Nitzana	Tepper and Bar-Oz	דניאל	2017-2020	C	312	3068-2	3	Light Fraction	0.5			71	שעורה דו-טורית		גרגיר	grain	דגניים	Gramineae	1
NZN-127	Nitzana	Tepper and Bar-Oz	דניאל	2017-2020	C	312	3068-2	3	Light Fraction	0.5			72		weevil?
NZN-127	Nitzana	Tepper and Bar-Oz	דניאל	2017-2020	C	312	3068-2	3	Light Fraction	0.5			73	חרק רצנטי
NZN-127	Nitzana	Tepper and Bar-Oz	דניאל	2017-2020	C	313	3068-3	4	Light Fraction	0.5			74	?							3cc נבדק
NZN-128	Nitzana	Tepper and Bar-Oz	דניאל	2017-2020	C	312	3068-2	3	Heavy Residue	2			1	חיטה/שעורה	Hordeum/Triticum	גרגיר	grain	דגניים	Gramineae	4	ועד שברים
NZN-128	Nitzana	Tepper and Bar-Oz	דניאל	2017-2020	C	312	3068-2	3	Heavy Residue	2			2	זית אירופאי	Olea europaea	גלעין	stone	זיתיים	Oleaceae	1
NZN-128	Nitzana	Tepper and Bar-Oz	דניאל	2017-2020	C	312	3068-2	3	Heavy Residue	2			3	תמר מצוי	Phoenix dactylifera	גלעין	stone	דקליים	Palmae	1	בכמה שברים
NZN-128	Nitzana	Tepper and Bar-Oz	דניאל	2017-2020	C	312	3068-2	3	Heavy Residue	2			4		quinoa*					1	מהמבחן שלי
NZN-128	Nitzana	Tepper and Bar-Oz	דניאל	2017-2020	C	312	3068-2	3	Heavy Residue	2			5	בלתי-שונות
NZN-128	Nitzana	Tepper and Bar-Oz	דניאל	2017-2020	C	312	3068-2	3	Heavy Residue	2			6	גלל/אפר?
NZN-159	Nitzana	Tepper and Bar-Oz	דניאל	2017-2020	C	312	3066-2A	3	Dry Sift	2?			1	שעורה	Hordeum	גרגיר	grain	דגניים	Gramineae	3
NZN-159	Nitzana	Tepper and Bar-Oz	דניאל	2017-2020	C	312	3066-2A	3	Dry Sift	2?			2	חיטה	Triticum	גרגיר	grain	דגניים	Gramineae	4
NZN-159	Nitzana	Tepper and Bar-Oz	דניאל	2017-2020	C	312	3066-2A	3	Dry Sift	2?			3	חיטה/שעורה	Hordeum/Triticum	גרגיר	grain	דגניים	Gramineae	8
NZN-159	Nitzana	Tepper and Bar-Oz	דניאל	2017-2020	C	312	3066-2A	3	Dry Sift	2?			4	?			culm nodes			4
NZN-159	Nitzana	Tepper and Bar-Oz	דניאל	2017-2020	C	312	3066-2A	3	Dry Sift	2?			5	עדשה	Lens culinaris			פרפרניים	Fabaceae	2
NZN-159	Nitzana	Tepper and Bar-Oz	דניאל	2017-2020	C	312	3066-2A	3	Dry Sift	2?			6	בקיי	Vicieae	זרע	seed	פרפרניים	Fabaceae	1
NZN-159	Nitzana	Tepper and Bar-Oz	דניאל	2017-2020	C	312	3066-2A	3	Dry Sift	2?			7	קטנית קטנה ועגולה	Vicieae?	זרע	seed	פרפרניים	Fabaceae	1
NZN-159	Nitzana	Tepper and Bar-Oz	דניאל	2017-2020	C	312	3066-2A	3	Dry Sift	2?			8							1
NZN-159	Nitzana	Tepper and Bar-Oz	דניאל	2017-2020	C	312	3066-2A	3	Dry Sift	2?			9
NZN-159	Nitzana	Tepper and Bar-Oz	דניאל	2017-2020	C	312	3066-2A	3	Dry Sift	2?			10	אמיך קוצני	Emex spinosa	זרע?	seed?	ארכוביתיים	Polygonaceae	1
NZN-159	Nitzana	Tepper and Bar-Oz	דניאל	2017-2020	C	312	3066-2A	3	Dry Sift	2?			11	קוצים						5
NZN-159	Nitzana	Tepper and Bar-Oz	דניאל	2017-2020	C	312	3066-2A	3	Dry Sift	2?			12	בלתי
NZN-160	Nitzana	Tepper and Bar-Oz	דניאל	2017-2020	C	312	3066-2B		Dry Sift	2?			1	שעורה	Hordeum	גרגיר	grain	דגניים	Gramineae	5
NZN-160	Nitzana	Tepper and Bar-Oz	דניאל	2017-2020	C	312	3066-2B		Dry Sift	2?			2	חיטה/שעורה	Hordeum/Triticum	גרגיר	grain	דגניים	Gramineae	3
NZN-160	Nitzana	Tepper and Bar-Oz	דניאל	2017-2020	C	312	3066-2B		Dry Sift	2?			3	?			culm node			1
NZN-160	Nitzana	Tepper and Bar-Oz	דניאל	2017-2020	C	312	3066-2B		Dry Sift	2?			4	עדשה	Lens culinaris			פרפרניים	Fabaceae	1
NZN-160	Nitzana	Tepper and Bar-Oz	דניאל	2017-2020	C	312	3066-2B		Dry Sift	2?			5	בלתי
NZN-160	Nitzana	Tepper and Bar-Oz	דניאל	2017-2020	C	312	3066-2B		Dry Sift	2?			6	גלל						1
NZN-160	Nitzana	Tepper and Bar-Oz	דניאל	2017-2020	C	312	3066-2B		Dry Sift	2?			7	grain imprint
NZN-161	Nitzana	Tepper and Bar-Oz	דניאל	2017-2020	C	312	3074-A		Dry Sift	2?			1	שעורה	Hordeum	גרגיר	grain	דגניים	Gramineae	7
NZN-161	Nitzana	Tepper and Bar-Oz	דניאל	2017-2020	C	312	3074-A		Dry Sift	2?			2	חיטה	Triticum	גרגיר	grain	דגניים	Gramineae	3
NZN-161	Nitzana	Tepper and Bar-Oz	דניאל	2017-2020	C	312	3074-A		Dry Sift	2?			3	חיטה/שעורה	Hordeum/Triticum	גרגיר	grain	דגניים	Gramineae	5
NZN-161	Nitzana	Tepper and Bar-Oz	דניאל	2017-2020	C	312	3074-A		Dry Sift	2?			4	חיטה/שעורה	Hordeum/Triticum	שברים		דגניים	Gramineae	12
NZN-161	Nitzana	Tepper and Bar-Oz	דניאל	2017-2020	C	312	3074-A		Dry Sift	2?			5				culm nodes			3
NZN-161	Nitzana	Tepper and Bar-Oz	דניאל	2017-2020	C	312	3074-A		Dry Sift	2?			6	עדשה	Lens culinaris			פרפרניים	Fabaceae	1
NZN-161	Nitzana	Tepper and Bar-Oz	דניאל	2017-2020	C	312	3074-A		Dry Sift	2?			7	בקיי	Vicieae	זרע	seed	פרפרניים	Fabaceae	3
NZN-161	Nitzana	Tepper and Bar-Oz	דניאל	2017-2020	C	312	3074-A		Dry Sift	2?			8	קטנית ?	Vicieae?	זרע	seed	פרפרניים	Fabaceae	2
NZN-161	Nitzana	Tepper and Bar-Oz	דניאל	2017-2020	C	312	3074-A		Dry Sift	2?			9	דבקה		זרע?				1
NZN-161	Nitzana	Tepper and Bar-Oz	דניאל	2017-2020	C	312	3074-A		Dry Sift	2?			10	בלתי
NZN-161	Nitzana	Tepper and Bar-Oz	דניאל	2017-2020	C	312	3074-A		Dry Sift	2?			11	בלתי
NZN-162	Nitzana	Tepper and Bar-Oz	דניאל	2017-2020	C	312	3074-B		Dry Sift	2			1	שעורה	Hordeum	גרגיר	grain	דגניים	Gramineae	14
NZN-162	Nitzana	Tepper and Bar-Oz	דניאל	2017-2020	C	312	3074-B		Dry Sift	2?			2	חיטה	Triticum	גרגיר	grain	דגניים	Gramineae	1
NZN-162	Nitzana	Tepper and Bar-Oz	דניאל	2017-2020	C	312	3074-B		Dry Sift	2?			3	חיטה/שעורה	Hordeum/Triticum	גרגיר	grain	דגניים	Gramineae	8
NZN-162	Nitzana	Tepper and Bar-Oz	דניאל	2017-2020	C	312	3074-B		Dry Sift	2?			4	עדשה?	Lens culinaris			פרפרניים	Fabaceae	2
NZN-162	Nitzana	Tepper and Bar-Oz	דניאל	2017-2020	C	312	3074-B		Dry Sift	2?			5	בקיי	Vicieae	זרע	seed	פרפרניים	Fabaceae	1
NZN-162	Nitzana	Tepper and Bar-Oz	דניאל	2017-2020	C	312	3074-B		Dry Sift	2?			6	בלתי
NZN-162	Nitzana	Tepper and Bar-Oz	דניאל	2017-2020	C	312	3074-B		Dry Sift	2?			7
NZN-163	Nitzana	Tepper and Bar-Oz	דניאל	2017-2020	C	314	3082-A		Dry Sift	2?			1	שעורה	Hordeum	גרגיר	grain	דגניים	Gramineae	2
NZN-163	Nitzana	Tepper and Bar-Oz	דניאל	2017-2020	C	314	3082-A		Dry Sift	2?			2	חיטה	Triticum	גרגיר	grain	דגניים	Gramineae	1
NZN-163	Nitzana	Tepper and Bar-Oz	דניאל	2017-2020	C	314	3082-A		Dry Sift	2?			3	חיטה/שעורה	Hordeum/Triticum	גרגיר	grain	דגניים	Gramineae	4
NZN-163	Nitzana	Tepper and Bar-Oz	דניאל	2017-2020	C	314	3082-A		Dry Sift	2?			4	גפן	Vitis vinifera	זרע?	seed?	גפניים	Vitaceae	1
NZN-163	Nitzana	Tepper and Bar-Oz	דניאל	2017-2020	C	314	3082-A		Dry Sift	2?			5	עדשה	Lens culinaris	זרע	seed	פרפרניים	Fabaceae	2
NZN-163	Nitzana	Tepper and Bar-Oz	דניאל	2017-2020	C	314	3082-A		Dry Sift	2?			6	בלתי
NZN-164	Nitzana	Tepper and Bar-Oz	דניאל	2017-2020	C	314	3082-B		Dry Sift	2?			1	חיטה/שעורה	Hordeum/Triticum	גרגיר	grain	דגניים	Gramineae	1	3C
NZN-164	Nitzana	Tepper and Bar-Oz	דניאל	2017-2020	C	314	3082-B		Dry Sift	2?			2	חיטה/שעורה	Hordeum/Triticum	גרגיר	grain	דגניים	Gramineae	2
NZN-164	Nitzana	Tepper and Bar-Oz	דניאל	2017-2020	C	314	3082-B		Dry Sift	2?			3				culm node			1
NZN-164	Nitzana	Tepper and Bar-Oz	דניאל	2017-2020	C	314	3082-B		Dry Sift	2?			4							1
NZN-164	Nitzana	Tepper and Bar-Oz	דניאל	2017-2020	C	314	3082-B		Dry Sift	2?			5	בלתי
NZN-164	Nitzana	Tepper and Bar-Oz	דניאל	2017-2020	C	314	3082-B		Dry Sift	2?			6	בלתי
NZN-165	Nitzana	Tepper and Bar-Oz	דניאל	2017-2020	C	314	3083-A		Dry Sift	2?			1							7	3c/l
NZN-165	Nitzana	Tepper and Bar-Oz	דניאל	2017-2020	C	314	3083-A		Dry Sift	2?			2			פרק גבעול	culm node			1
NZN-165	Nitzana	Tepper and Bar-Oz	דניאל	2017-2020	C	314	3083-A		Dry Sift	2?			3	גפן	Vitis vinifera	עוקץ	pedicel	גפניים	Vitaceae	1
NZN-166	Nitzana	Tepper and Bar-Oz	דניאל	2017-2020	C	314	3083-B		Dry Sift	2?			1	שעורה	Hordeum	גרגיר	grain	דגניים	Gramineae	8
NZN-166	Nitzana	Tepper and Bar-Oz	דניאל	2017-2020	C	314	3083-B		Dry Sift	2?			2	חיטה/שעורה	Hordeum/Triticum	גרגיר	grain	דגניים	Gramineae	2
NZN-166	Nitzana	Tepper and Bar-Oz	דניאל	2017-2020	C	314	3083-B		Dry Sift	2?			3	אבטיח הפקועה	Citrullus colocynthus	זרע				1
NZN-166	Nitzana	Tepper and Bar-Oz	דניאל	2017-2020	C	314	3083-B		Dry Sift	2?			4	בלתי - קטנית?						1
NZN-166	Nitzana	Tepper and Bar-Oz	דניאל	2017-2020	C	314	3083-B		Dry Sift	2?			5	בלתי - קטנית?						1
NZN-166	Nitzana	Tepper and Bar-Oz	דניאל	2017-2020	C	314	3083-B		Dry Sift	2?			6	?			culm node			1
NZN-166	Nitzana	Tepper and Bar-Oz	דניאל	2017-2020	C	314	3083-B		Dry Sift	2?			7	בלתי						4
NZN-167	Nitzana	Tepper and Bar-Oz	דניאל	2017-2020	C	314	3084-A		Dry Sift	2?			1	שעורה	Hordeum	גרגיר	grain	דגניים	Gramineae	1
NZN-167	Nitzana	Tepper and Bar-Oz	דניאל	2017-2020	C	314	3084-A		Dry Sift	2?			2	חיטה	Triticum	גרגיר	grain	דגניים	Gramineae	1
NZN-167	Nitzana	Tepper and Bar-Oz	דניאל	2017-2020	C	314	3084-A		Dry Sift	2?			3	חיטה/שעורה	Hordeum/Triticum	גרגיר	grain	דגניים	Gramineae	7
NZN-167	Nitzana	Tepper and Bar-Oz	דניאל	2017-2020	C	314	3084-A		Dry Sift	2?			4							1
NZN-167	Nitzana	Tepper and Bar-Oz	דניאל	2017-2020	C	314	3084-A		Dry Sift	2?			5	עדשה	Lens culinaris			פרפרניים	Fabaceae	1
NZN-167	Nitzana	Tepper and Bar-Oz	דניאל	2017-2020	C	314	3084-A		Dry Sift	2?			6	cf. בקיית הכרשינה	cf. Vicia ervilia	פסיג	cotyledon	פרפרניים	Fabaceae	1
NZN-167	Nitzana	Tepper and Bar-Oz	דניאל	2017-2020	C	314	3084-A		Dry Sift	2?			7	בלתי
NZN-168	Nitzana	Tepper and Bar-Oz	דניאל	2017-2020	C	314	3084-B		Dry Sift	2?			1	שעורה	Hordeum	גרגיר	grain	דגניים	Gramineae	1	3c/l
NZN-168	Nitzana	Tepper and Bar-Oz	דניאל	2017-2020	C	314	3084-B		Dry Sift	2?			2	חיטה/שעורה	Hordeum/Triticum	גרגיר	grain	דגניים	Gramineae	7
NZN-168	Nitzana	Tepper and Bar-Oz	דניאל	2017-2020	C	314	3084-B		Dry Sift	2?			3	עדשהcf.	cf. Lens culinaris	זרע	seed	פרפרניים	Fabaceae	1
NZN-168	Nitzana	Tepper and Bar-Oz	דניאל	2017-2020	C	314	3084-B		Dry Sift	2?			4	בקיית הכרשינה	Vicia ervilia	זרע	seed	פרפרניים	Fabaceae	1
NZN-168	Nitzana	Tepper and Bar-Oz	דניאל	2017-2020	C	314	3084-B		Dry Sift	2?			5	בקיים	Vicieae	זרע	seed	פרפרניים	Fabaceae	1
NZN-168	Nitzana	Tepper and Bar-Oz	דניאל	2017-2020	C	314	3084-B		Dry Sift	2?			6	בלתי
NZN-168	Nitzana	Tepper and Bar-Oz	דניאל	2017-2020	C	314	3084-B		Dry Sift	2?			7	בלתי
NZN-169	Nitzana	Tepper and Bar-Oz	דניאל	2017-2020	C	312	3046-1		Dry Sift	2?			1	שעורה	Hordeum	גרגיר	grain	דגניים	Gramineae	8
NZN-169	Nitzana	Tepper and Bar-Oz	דניאל	2017-2020	C	312	3046-1		Dry Sift	2?			2	חיטה	Triticum	גרגיר	grain	דגניים	Gramineae	3
NZN-169	Nitzana	Tepper and Bar-Oz	דניאל	2017-2020	C	312	3046-1		Dry Sift	2?			3	חיטה/שעורה	Hordeum/Triticum	גרגיר	grain	דגניים	Gramineae	12
NZN-169	Nitzana	Tepper and Bar-Oz	דניאל	2017-2020	C	312	3046-1		Dry Sift	2?			4	גפן	Vitis vinifera	זרע?	seed?	גפניים	Vitaceae	1
NZN-169	Nitzana	Tepper and Bar-Oz	דניאל	2017-2020	C	312	3046-1		Dry Sift	2?			5				rachis fragments			2
NZN-169	Nitzana	Tepper and Bar-Oz	דניאל	2017-2020	C	312	3046-1		Dry Sift	2?			6				culm nodes			5
NZN-169	Nitzana	Tepper and Bar-Oz	דניאל	2017-2020	C	312	3046-1		Dry Sift	2?			7							2
NZN-169	Nitzana	Tepper and Bar-Oz	דניאל	2017-2020	C	312	3046-1		Dry Sift	2?			8	בקיים	Vicieae	זרע	seed	פרפרניים	Fabaceae	2
NZN-169	Nitzana	Tepper and Bar-Oz	דניאל	2017-2020	C	312	3046-1		Dry Sift	2?			9	בקיים	Vicieae	זרע	seed	פרפרניים	Fabaceae	2
NZN-169	Nitzana	Tepper and Bar-Oz	דניאל	2017-2020	C	312	3046-1		Dry Sift	2?			10	בלתי
NZN-170	Nitzana	Tepper and Bar-Oz	דניאל	2017-2020	C	312	3067-2		Dry Sift	2?			1	שעורה	Hordeum	גרגיר	grain	דגניים	Gramineae	21
NZN-170	Nitzana	Tepper and Bar-Oz	דניאל	2017-2020	C	312	3067-2		Dry Sift	2?			2	חיטה/שעורה	Hordeum/Triticum	גרגיר	grain	דגניים	Gramineae	13
NZN-170	Nitzana	Tepper and Bar-Oz	דניאל	2017-2020	C	312	3067-2		Dry Sift	2?			3	חיטה/שעורה	Hordeum/Triticum	שברים		דגניים	Gramineae	11
NZN-170	Nitzana	Tepper and Bar-Oz	דניאל	2017-2020	C	312	3067-2		Dry Sift	2?			4				culm nodes			3
NZN-170	Nitzana	Tepper and Bar-Oz	דניאל	2017-2020	C	312	3067-2		Dry Sift	2?			5	בקיים	Vicieae	זרע	seed	פרפרניים	Fabaceae	1
NZN-170	Nitzana	Tepper and Bar-Oz	דניאל	2017-2020	C	312	3067-2		Dry Sift	2?			6	בקיים	Vicieae	זרע	seed	פרפרניים	Fabaceae	2
NZN-170	Nitzana	Tepper and Bar-Oz	דניאל	2017-2020	C	312	3067-2		Dry Sift	2?			7	בלתי
NZN-170	Nitzana	Tepper and Bar-Oz	דניאל	2017-2020	C	312	3067-2		Dry Sift	2?			8	בלתי - שונות
NZN-171	Nitzana	Tepper and Bar-Oz	דניאל	2017-2020	C	312	3068-2		Dry Sift	2?			1	שעורה	Hordeum	גרגיר	grain	דגניים	Gramineae	31
NZN-171	Nitzana	Tepper and Bar-Oz	דניאל	2017-2020	C	312	3068-2		Dry Sift	2?			2	חיטה	Triticum	גרגיר	grain	דגניים	Gramineae	2
NZN-171	Nitzana	Tepper and Bar-Oz	דניאל	2017-2020	C	312	3068-2		Dry Sift	2?			3	חיטה/שעורה	Hordeum/Triticum	גרגיר	grain	דגניים	Gramineae	20
NZN-171	Nitzana	Tepper and Bar-Oz	דניאל	2017-2020	C	312	3068-2		Dry Sift	2?			4	גפן	Vitis vinifera	זרע?	seed?	גפניים	Vitaceae	1
NZN-171	Nitzana	Tepper and Bar-Oz	דניאל	2017-2020	C	312	3068-2		Dry Sift	2?			5				rachis fragments?			4
NZN-171	Nitzana	Tepper and Bar-Oz	דניאל	2017-2020	C	312	3068-2		Dry Sift	2?			6				culm nodes			5
NZN-171	Nitzana	Tepper and Bar-Oz	דניאל	2017-2020	C	312	3068-2		Dry Sift	2?			7	חיטה/שעורה	Hordeum/Triticum	שברים		דגניים	Gramineae
NZN-171	Nitzana	Tepper and Bar-Oz	דניאל	2017-2020	C	312	3068-2		Dry Sift	2?			8	cf. עדשה	cf. Lens culinaris			פרפרניים	Fabaceae	1
NZN-171	Nitzana	Tepper and Bar-Oz	דניאל	2017-2020	C	312	3068-2		Dry Sift	2?			9	בקיים	Vicieae	זרע	seed	פרפרניים	Fabaceae	4
NZN-171	Nitzana	Tepper and Bar-Oz	דניאל	2017-2020	C	312	3068-2		Dry Sift	2?			10	בקיים	Vicieae	זרע	seed	פרפרניים	Fabaceae	2
NZN-171	Nitzana	Tepper and Bar-Oz	דניאל	2017-2020	C	312	3068-2		Dry Sift	2?			11	בלתי						4
NZN-171	Nitzana	Tepper and Bar-Oz	דניאל	2017-2020	C	312	3068-2		Dry Sift	2?			12	דבקה						1
NZN-171	Nitzana	Tepper and Bar-Oz	דניאל	2017-2020	C	312	3068-2		Dry Sift	2?			13	גפן cf.	cf. Vitis vinifera	עוקץ	pedicel	גפניים?	Vitaceae?	1
NZN-171	Nitzana	Tepper and Bar-Oz	דניאל	2017-2020	C	312	3068-2		Dry Sift	2?			14	בלתי - תמר? קטנית?						4
NZN-171	Nitzana	Tepper and Bar-Oz	דניאל	2017-2020	C	312	3068-2		Dry Sift	2?			15	בלתי

## Sheet: שטח D
Lab #	Site	Excavator	Archaeobotanist	Year analyzed	Area	Locus	Basket	Sediment Volume (liter)	Flotation (Light/Heavy/Dry Sift)	Fraction size (mm)	Dating	Vial no.	מין הצמח	Plant Latin name	איבר	Organ	משפחה	Family	Quantity	Notes
NZN-129	Nitzana	Tepper and Bar-Oz	דניאל	2017-2020	D	401	4001-1	3	Light Fraction	2		1	שעורה	Hordeum	גרגיר	grain	דגניים	Gramineae	1
NZN-129	Nitzana	Tepper and Bar-Oz	דניאל	2017-2020	D	401	4001-1	3	Light Fraction	2		2	חיטה	Triticum	גרגיר	grain	דגניים	Gramineae	1
NZN-129	Nitzana	Tepper and Bar-Oz	דניאל	2017-2020	D	401	4001-1	3	Light Fraction	2		3	חיטה/שעורה	Hordeum/Triticum	גרגיר	grain	דגניים	Gramineae	2
NZN-129	Nitzana	Tepper and Bar-Oz	דניאל	2017-2020	D	401	4001-1	3	Light Fraction	2		4			פרקי גבעול	culm nodes	דגניים	Gramineae	3
NZN-129	Nitzana	Tepper and Bar-Oz	דניאל	2017-2020	D	401	4001-1	3	Light Fraction	2		5	אהל מצוי	Mesembryanthemum nodiflorum	אגוזית	nutlet		Aizoaceae	5	רצנטי
NZN-129	Nitzana	Tepper and Bar-Oz	דניאל	2017-2020	D	401	4001-1	3	Light Fraction	2		6	בלתי-שונות							רצנטי
NZN-129	Nitzana	Tepper and Bar-Oz	דניאל	2017-2020	D	401	4001-1	3	Light Fraction	2		7	גללים							שני טיפוסים, הרוב רצנטי
NZN-130	Nitzana	Tepper and Bar-Oz	דניאל	2017-2020	D	401	4001-1	3	Heavy Residue	2		1	חיטה/שעורה	Hordeum/Triticum	שברי גרגיר	grain fragments	דגניים	Gramineae
NZN-130	Nitzana	Tepper and Bar-Oz	דניאל	2017-2020	D	401	4001-1	3	Heavy Residue	2		2	עדשה?	Lens culinaris	פסיג	cotyledon	פרפרניים	Fabaceae	1
NZN-130	Nitzana	Tepper and Bar-Oz	דניאל	2017-2020	D	401	4001-1	3	Heavy Residue	2		3	בלתי-שונות
NZN-130	Nitzana	Tepper and Bar-Oz	דניאל	2017-2020	D	401	4001-1	3	Heavy Residue	2		4	גללים
NZN-131	Nitzana	Tepper and Bar-Oz	דניאל	2017-2020	D	406	4045-1	3	Light Fraction	2		אין זרעים	אין זרעים	אין זרעים	אין זרעים	אין זרעים	אין זרעים	אין זרעים	אין זרעים	אין זרעים
NZN-132	Nitzana	Tepper and Bar-Oz	דניאל	2017-2020	D	406	4045-1	3	Heavy Residue	2		1	בלתי-שונות

## Sheet: שטח E
Lab #	Site	Excavator	Archaeobotanist	Year analyzed	Area	Locus	Bucket	Sediment Volume (liter)	Flotation (Light/Heavy/Dry Sift)	Fraction size (mm)	Group	Vial no.	מין הצמח	Plant Latin name	איבר	Organ	משפחה	Family	Quantity calculated	Quantity	Notes
NZN-133	Nitzana	Tepper and Bar-Oz	Daniel Fuks	2017-2020	E	501	5038	3	Light Fraction	2	1	1	חיטה	Triticum	גרגיר	grain	דגניים	Gramineae	1	1
NZN-133	Nitzana	Tepper and Bar-Oz	Daniel Fuks	2017-2021	E	501	5038	3	Light Fraction	2	1	2			פרקי גבעול	culm nodes	דגניים	Gramineae	1	1
NZN-133	Nitzana	Tepper and Bar-Oz	Daniel Fuks	2017-2022	E	501	5038	3	Light Fraction	2	2	3	קטנית		זרע	seed	פרפרניים	Fabaceae	1	1	קטנית קטנה ועגולה
NZN-134	Nitzana	Tepper and Bar-Oz	Daniel Fuks	2017-2023	E	501	5038	3	Heavy Residue	2	1	1	חיטה/שעורה	Hordeum/Triticum	גרגיר	grain	דגניים	Gramineae	2	2
NZN-135	Nitzana	Tepper and Bar-Oz	Daniel Fuks	2017-2024	E	503	5022	3	Light Fraction	2	1	1	שעורה	Hordeum	גרגיר	grain	דגניים	Gramineae	1	1
NZN-135	Nitzana	Tepper and Bar-Oz	Daniel Fuks	2017-2025	E	503	5022	3	Light Fraction	2	1	2	חיטה	Triticum	גרגיר	grain	דגניים	Gramineae	4	4
NZN-135	Nitzana	Tepper and Bar-Oz	Daniel Fuks	2017-2026	E	503	5022	3	Light Fraction	2	1	3	חיטה/שעורה	Hordeum/Triticum	שברי גרגיר	grain fragment	דגניים	Gramineae	2	2
NZN-135	Nitzana	Tepper and Bar-Oz	Daniel Fuks	2017-2027	E	503	5022	3	Light Fraction	2	3	4	גפן	Vitis vinifera	חרצן	pip	גפניים	Vitaceae	1	1
NZN-135	Nitzana	Tepper and Bar-Oz	Daniel Fuks	2017-2028	E	503	5022	3	Light Fraction	2	1	5			פרקי גבעול	culm nodes	דגניים	Gramineae	4	4	אחד שורש
NZN-135	Nitzana	Tepper and Bar-Oz	Daniel Fuks	2017-2029	E	503	5022	3	Light Fraction	2	1	6			שברי מלען	awn fragments	דגניים	Gramineae
NZN-135	Nitzana	Tepper and Bar-Oz	Daniel Fuks	2017-2030	E	503	5022	3	Light Fraction	2		7	אהל מצוי?	cf. Mesembryanthemum nodiflorum	זרע	seed			1	1
NZN-135	Nitzana	Tepper and Bar-Oz	Daniel Fuks	2017-2031	E	503	5022	3	Light Fraction	2	7	8	בלתי						1	1
NZN-135	Nitzana	Tepper and Bar-Oz	Daniel Fuks	2017-2032	E	503	5022	3	Light Fraction	2	7	9	בלתי		קליפה				1	1
NZN-135	Nitzana	Tepper and Bar-Oz	Daniel Fuks	2017-2033	E	503	5022	3	Light Fraction	2		10	אהל מצוי	Mesembryanthemum nodiflorum	אגוזית	nutlet	חיעדיים	Aizoaceae			ועוד מינים רצנטיים
NZN-135	Nitzana	Tepper and Bar-Oz	Daniel Fuks	2017-2034	E	503	5022	3	Light Fraction	2	8	11	גללים								סוגים שונים, כולל גושי אהל מצוי
NZN-136	Nitzana	Tepper and Bar-Oz	Daniel Fuks	2017-2035	E	503	5022	3	Heavy Residue	2	1	1	חיטה	Triticum	שבר גרגיר	grain fragment	דגניים	Gramineae			שבר גרגיר, זיהוי לו וודאי
NZN-136	Nitzana	Tepper and Bar-Oz	Daniel Fuks	2017-2036	E	503	5022	3	Heavy Residue	2	1	2	חיטה/שעורה	Hordeum/Triticum	גרגיר	grain	דגניים	Gramineae	2	2
NZN-136	Nitzana	Tepper and Bar-Oz	Daniel Fuks	2017-2037	E	503	5022	3	Heavy Residue	2	2	3	בקיית הכרשינה	Vicia ervilia	זרע	seed	פרפרניים	Fabaceae	1	1
NZN-136	Nitzana	Tepper and Bar-Oz	Daniel Fuks	2017-2038	E	503	5022	3	Heavy Residue	2	2	4	?קטנית		זרע	seed	פרפרניים	Fabaceae	1	1	קטנית קטנה ועגולה
NZN-136	Nitzana	Tepper and Bar-Oz	Daniel Fuks	2017-2039	E	503	5022	3	Heavy Residue	2	7	5	בלתי-שונות
NZN-136	Nitzana	Tepper and Bar-Oz	Daniel Fuks	2017-2040	E	503	5022	3	Heavy Residue	2	8	6	גללים
NZN-137	Nitzana	Tepper and Bar-Oz	Daniel Fuks	2017-2041	E	503	5026	3	Light Fraction	2	1	1	שעורה	Hordeum	גרגיר	grain	דגניים	Gramineae	11	10	MNI=11 with fragments
NZN-137	Nitzana	Tepper and Bar-Oz	Daniel Fuks	2017-2042	E	503	5026	3	Light Fraction	2	1	2	חיטה	Triticum	גרגיר	grain	דגניים	Gramineae	5	5
NZN-137	Nitzana	Tepper and Bar-Oz	Daniel Fuks	2017-2043	E	503	5026	3	Light Fraction	2	1	3	חיטה/שעורה	Hordeum/Triticum	שברי גרגיר	grain fragment	דגניים	Gramineae	3	3
NZN-137	Nitzana	Tepper and Bar-Oz	Daniel Fuks	2017-2044	E	503	5026	3	Light Fraction	2	3	4	גפן	Vitis vinifera	חרצן	pip	גפניים	Vitaceae	5	5
NZN-137	Nitzana	Tepper and Bar-Oz	Daniel Fuks	2017-2045	E	503	5026	3	Light Fraction	2	1	5			חלקי שדרה	rachis fragments	דגניים	Gramineae	2	2	טיפוסים שונים
NZN-137	Nitzana	Tepper and Bar-Oz	Daniel Fuks	2017-2046	E	503	5026	3	Light Fraction	2	1	6			פרקי גבעול	culm nodes	דגניים	Gramineae	13	13	מתוכם 4 שורשים	עוד אחד שלא מזוהה
NZN-137	Nitzana	Tepper and Bar-Oz	Daniel Fuks	2017-2047	E	503	5026	3	Light Fraction	2	3	7	רימון	Punica granatum	קליפה	peel	רימוניים	Lythraceae
NZN-137	Nitzana	Tepper and Bar-Oz	Daniel Fuks	2017-2048	E	503	5026	3	Light Fraction	2	2	8	עדשה תרבותית	Lens culinaris	פסיג	cotyledon	פרפרניים	Fabaceae	1	1
NZN-137	Nitzana	Tepper and Bar-Oz	Daniel Fuks	2017-2049	E	503	5026	3	Light Fraction	2	2	9	בקיים	Vicieae	פסיג	cotyledon	פרפרניים	Fabaceae	5	5	5 פסיגים	אחד כרשינה
NZN-137	Nitzana	Tepper and Bar-Oz	Daniel Fuks	2017-2050	E	503	5026	3	Light Fraction	2	6	10	Salsoleae	Salsoleae	פרקי גבעול	stem fragment	סלקיים	Chenopodiaceae	1	1
NZN-137	Nitzana	Tepper and Bar-Oz	Daniel Fuks	2017-2051	E	503	5026	3	Light Fraction	2	7	11	בלתי		קליפת זרע?
NZN-137	Nitzana	Tepper and Bar-Oz	Daniel Fuks	2017-2052	E	503	5026	3	Light Fraction	2	7	12	cf. רימון	cf. Punica granatum	קליפה	rind fragment	רימוניים	Lythraceae
NZN-137	Nitzana	Tepper and Bar-Oz	Daniel Fuks	2017-2053	E	503	5026	3	Light Fraction	2	7	13	תמר??		קליפה
NZN-137	Nitzana	Tepper and Bar-Oz	Daniel Fuks	2017-2054	E	503	5026	3	Light Fraction	2	7	14	בלתי-שונות
NZN-137	Nitzana	Tepper and Bar-Oz	Daniel Fuks	2017-2055	E	503	5026	3	Light Fraction	2	6	15	אהל מצוי	Mesembryanthemum nodiflorum	אגוזית	nutlet	חיעדיים	Aizoaceae			ועוד מינים רצנטיים
NZN-137	Nitzana	Tepper and Bar-Oz	Daniel Fuks	2017-2056	E	503	5026	3	Light Fraction	2	8	16	גללים
NZN-137	Nitzana	Tepper and Bar-Oz	Daniel Fuks	2017-2057	E	503	5026	3	Light Fraction	2	8	17	גללים
NZN-138	Nitzana	Tepper and Bar-Oz	Daniel Fuks	2017-2058	E	503	5026	3	Heavy Residue	2	1	1	שעורה	Hordeum	גרגיר	grain	דגניים	Gramineae	2	2
NZN-138	Nitzana	Tepper and Bar-Oz	Daniel Fuks	2017-2059	E	503	5026	3	Heavy Residue	2	1	2	חיטה	Triticum	גרגיר	grain	דגניים	Gramineae	4	4
NZN-138	Nitzana	Tepper and Bar-Oz	Daniel Fuks	2017-2060	E	503	5026	3	Heavy Residue	2	1	3	חיטה/שעורה	Hordeum/Triticum	שברי גרגיר	grain fragment	דגניים	Gramineae	1	1
NZN-138	Nitzana	Tepper and Bar-Oz	Daniel Fuks	2017-2061	E	503	5026	3	Heavy Residue	2	3	4	גפן	Vitis vinifera	חרצן	pip	גפניים	Vitaceae	3	3
NZN-138	Nitzana	Tepper and Bar-Oz	Daniel Fuks	2017-2062	E	503	5026	3	Heavy Residue	2	3	5
NZN-138	Nitzana	Tepper and Bar-Oz	Daniel Fuks	2017-2063	E	503	5026	3	Heavy Residue	2	3	6
NZN-138	Nitzana	Tepper and Bar-Oz	Daniel Fuks	2017-2064	E	503	5026	3	Heavy Residue	2	7	7	בלתי-שונות
NZN-138	Nitzana	Tepper and Bar-Oz	Daniel Fuks	2017-2065	E	503	5026	3	Heavy Residue	2	8	8	גללים
NZN-139	Nitzana	Tepper and Bar-Oz	Daniel Fuks	2017-2066	E	503	5033	3	Light Fraction	2	1	1	שעורה	Hordeum	גרגיר	grain	דגניים	Gramineae	6	6
NZN-139	Nitzana	Tepper and Bar-Oz	Daniel Fuks	2017-2067	E	503	5033	3	Light Fraction	2	1	2	חיטה	Triticum	גרגיר	grain	דגניים	Gramineae	6	6
NZN-139	Nitzana	Tepper and Bar-Oz	Daniel Fuks	2017-2068	E	503	5033	3	Light Fraction	2	1	3	חיטה/שעורה	Hordeum/Triticum	שברי גרגיר	grain fragment	דגניים	Gramineae	4	4
NZN-139	Nitzana	Tepper and Bar-Oz	Daniel Fuks	2017-2069	E	503	5033	3	Light Fraction	2	3	4	גפן	Vitis vinifera	חרצן	pip	גפניים	Vitaceae	11	11
NZN-139	Nitzana	Tepper and Bar-Oz	Daniel Fuks	2017-2070	E	503	5033	3	Light Fraction	2	1	5			חלקי שדרה	rachis fragments	דגניים	Gramineae	3	3
NZN-139	Nitzana	Tepper and Bar-Oz	Daniel Fuks	2017-2071	E	503	5033	3	Light Fraction	2	1	6			פרקי גבעול	culm nodes	דגניים	Gramineae	12	12	3 שורשים
NZN-139	Nitzana	Tepper and Bar-Oz	Daniel Fuks	2017-2072	E	503	5033	3	Light Fraction	2	3	7	cf. רימון	cf. Punica granatum	שבר קליפת הפרי	rind fragment	רימוניים	Lythraceae
NZN-139	Nitzana	Tepper and Bar-Oz	Daniel Fuks	2017-2073	E	503	5033	3	Light Fraction	2	2	8	עדשה תרבותית	Lens culinaris	זרע	seed	פרפרניים	Fabaceae	1	1
NZN-139	Nitzana	Tepper and Bar-Oz	Daniel Fuks	2017-2074	E	503	5033	3	Light Fraction	2	2	9	בקיים	Vicieae	זרע	seed	פרפרניים	Fabaceae	1	1		רימון?	Punica granatum?	שבר קליפת הפרי	peel fragment	רימוניים					Lythraceae
NZN-139	Nitzana	Tepper and Bar-Oz	Daniel Fuks	2017-2075	E	503	5033	3	Heavy Residue	2	2	10	קטנית		פסיגים	cotyledon	פרפרניים	Fabaceae	2	2
NZN-139	Nitzana	Tepper and Bar-Oz	Daniel Fuks	2017-2076	E	503	5033	3	Light Fraction	2	3	11	תמר?	Phoenix dactylifera	שבר גלעין	stone fragment	דקליים	Palmae	1	1
NZN-139	Nitzana	Tepper and Bar-Oz	Daniel Fuks	2017-2077	E	503	5033	3	Light Fraction	2		12	רימון מצוי cf.	cf. Punica granatum	זרע	seed	cf. רימוניים	cf. Lythraceae	2	2	אולי זרע רימון
NZN-139	Nitzana	Tepper and Bar-Oz	Daniel Fuks	2017-2078	E	503	5033	3	Light Fraction	2	6	13	זוגן?						1	1
NZN-139	Nitzana	Tepper and Bar-Oz	Daniel Fuks	2017-2079	E	503	5033	3	Light Fraction	2		14	בלתי								גלל? ציפה?
NZN-139	Nitzana	Tepper and Bar-Oz	Daniel Fuks	2017-2080	E	503	5033	3	Light Fraction	2	6	15	אהל מצוי	Mesembryanthemum nodiflorum	אגוזית	nutlet	חיעדיים	Aizoaceae			ועוד מינים רצנטיים
NZN-139	Nitzana	Tepper and Bar-Oz	Daniel Fuks	2017-2081	E	503	5033	3	Light Fraction	2	8	16	גללים						45	45	של מכרסמים? עם אהל בפנים
NZN-139	Nitzana	Tepper and Bar-Oz	Daniel Fuks	2017-2082	E	503	5033	3	Light Fraction	2	8	17	גללים
NZN-140	Nitzana	Tepper and Bar-Oz	Daniel Fuks	2017-2083	E	503	5033		Heavy Residue	2	1	1	שעורה	Hordeum	גרגיר	grain	דגניים	Gramineae	3	1	MNI=3 with fragments
NZN-140	Nitzana	Tepper and Bar-Oz	Daniel Fuks	2017-2084	E	503	5033		Heavy Residue	2	1	2	חיטה	Triticum	גרגיר	grain	דגניים	Gramineae	4	4
NZN-140	Nitzana	Tepper and Bar-Oz	Daniel Fuks	2017-2085	E	503	5033		Heavy Residue	2	3	3	גפן	Vitis vinifera	חרצן	pip	גפניים	Vitaceae	8	8
NZN-140	Nitzana	Tepper and Bar-Oz	Daniel Fuks	2017-2086	E	503	5033		Heavy Residue	2	2	4	עדשה תרבותית	Lens culinaris	זרע ופסיג	seed and cotyledon	פרפרניים	Fabaceae	2	2	הפסיג ודאי, הזרע הרוס
NZN-140	Nitzana	Tepper and Bar-Oz	Daniel Fuks	2017-2087	E	503	5033		Heavy Residue	2	2	5	בקיית הכרשינה	Vicia ervilia	זרע ופסיג	seed and cotyledon	פרפרניים	Fabaceae	2	2
NZN-140	Nitzana	Tepper and Bar-Oz	Daniel Fuks	2017-2088	E	503	5033		Heavy Residue	2	2	6	בלתי		שברי זרע	fragments	פרפרניים	Fabaceae
NZN-140	Nitzana	Tepper and Bar-Oz	Daniel Fuks	2017-2089	E	503	5033		Heavy Residue	2	3	7	תמר	Phoenix dactylifera	שבר גלעין	stone fragment	דקליים	Palmae	1	1
NZN-140	Nitzana	Tepper and Bar-Oz	Daniel Fuks	2017-2090	E	503	5033		Heavy Residue	2	7	8	בלתי-שונות
NZN-140	Nitzana	Tepper and Bar-Oz	Daniel Fuks	2017-2091	E	503	5033		Heavy Residue	2	8	9	גללים
NZN-140	Nitzana	Tepper and Bar-Oz	Daniel Fuks	2017-2092	E	503	5033		Heavy Residue	2	7	10	בלתי		אגוזית	nutlet			1	1	תאנה? סלקי?
NZN-141	Nitzana	Tepper and Bar-Oz	Daniel Fuks	2017-2093	E	503	5050	3	Light Fraction	2	1	1	שעורה	Hordeum	גרגיר	grain	דגניים	Gramineae	13	13
NZN-141	Nitzana	Tepper and Bar-Oz	Daniel Fuks	2017-2094	E	503	5050	3	Light Fraction	2	1	2	חיטה	Triticum	גרגיר	grain	דגניים	Gramineae	12	12
NZN-141	Nitzana	Tepper and Bar-Oz	Daniel Fuks	2017-2095	E	503	5050	3	Light Fraction	2	1	3	חיטה/שעורה	Hordeum/Triticum	שברי גרגיר	grain fragment	דגניים	Gramineae	5	5	להראות ליעל
NZN-141	Nitzana	Tepper and Bar-Oz	Daniel Fuks	2017-2096	E	503	5050	3	Light Fraction	2	3	4	גפן	Vitis vinifera	חרצן	pip	גפניים	Vitaceae	2	2
NZN-141	Nitzana	Tepper and Bar-Oz	Daniel Fuks	2017-2097	E	503	5050	3	Light Fraction	2	1	5			פרקי גבעול	culm nodes	דגניים	Gramineae	19	19	4 שורשים
NZN-141	Nitzana	Tepper and Bar-Oz	Daniel Fuks	2017-2098	E	503	5050	3	Light Fraction	2		6	בקיית הכרשינה	Vicia ervilia	זרע ופסיג	seed and cotyledon	פרפרניים	Fabaceae	7	7	4זרעים ו6פסיגים
NZN-141	Nitzana	Tepper and Bar-Oz	Daniel Fuks	2017-2099	E	503	5050	3	Light Fraction	2		7	cf. רימון	cf. Punica granatum	שבר קליפת הפרי	peel fragment	רימוניים	Lythraceae
NZN-141	Nitzana	Tepper and Bar-Oz	Daniel Fuks	2017-2100	E	503	5050	3	Light Fraction	2		8	cf. פיקוס התאנה	cf. Ficus carica	ציפה ואגוזיות	pulp and nutlets
NZN-141	Nitzana	Tepper and Bar-Oz	Daniel Fuks	2017-2101	E	503	5050	3	Light Fraction	2		9	בלתי
NZN-141	Nitzana	Tepper and Bar-Oz	Daniel Fuks	2017-2102	E	503	5050	3	Light Fraction	2		10	בלתי								זוגני?
NZN-141	Nitzana	Tepper and Bar-Oz	Daniel Fuks	2017-2103	E	503	5050	3	Light Fraction	2		11	Salsoleae	Salsoleae	פרק גבעול	stem fragment	סלקיים	Chenopodiaceae	1	1
NZN-141	Nitzana	Tepper and Bar-Oz	Daniel Fuks	2017-2104	E	503	5050	3	Light Fraction	2		12	בלתי						1	1
NZN-141	Nitzana	Tepper and Bar-Oz	Daniel Fuks	2017-2105	E	503	5050	3	Light Fraction	2		13	אהל מצוי	Mesembryanthemum nodiflorum	אגוזית	nutlet	חיעדיים	Aizoaceae			רצנטי
NZN-141	Nitzana	Tepper and Bar-Oz	Daniel Fuks	2017-2106	E	503	5050	3	Light Fraction	2		14	בלתי-שונות
NZN-141	Nitzana	Tepper and Bar-Oz	Daniel Fuks	2017-2107	E	503	5050	3	Light Fraction	2		15	גללים								גללים שהפכו לאפר
NZN-141	Nitzana	Tepper and Bar-Oz	Daniel Fuks	2017-2108	E	503	5050	3	Light Fraction	2		15	גללים								שני טיפוסים
NZN-142	Nitzana	Tepper and Bar-Oz	Daniel Fuks	2017-2109	E	503	5050	3	Heavy Residue	2	1	1	שעורה	Hordeum	גרגיר	grain	דגניים	Gramineae	4	4
NZN-142	Nitzana	Tepper and Bar-Oz	Daniel Fuks	2017-2110	E	503	5050	3	Heavy Residue	2		2	חיטה/שעורה	Hordeum/Triticum	שברי גרגיר	grain fragment	דגניים	Gramineae	3	3
NZN-142	Nitzana	Tepper and Bar-Oz	Daniel Fuks	2017-2111	E	503	5050	3	Heavy Residue	2		3	גפן	Vitis vinifera	חרצן	pip	גפניים	Vitaceae	2	2
NZN-142	Nitzana	Tepper and Bar-Oz	Daniel Fuks	2017-2112	E	503	5050	3	Heavy Residue	2		4	תמר	Phoenix dactylifera	שבר גלעין	stone fragment	דקליים	Palmae	1	1
NZN-142	Nitzana	Tepper and Bar-Oz	Daniel Fuks	2017-2113	E	503	5050	3	Heavy Residue	2		5	בלתי						1	1
NZN-142	Nitzana	Tepper and Bar-Oz	Daniel Fuks	2017-2114	E	503	5050	3	Heavy Residue	2		6	עדשה תרבותית	Lens culinaris	פסיג	cotyledon	פרפרניים	Fabaceae
NZN-142	Nitzana	Tepper and Bar-Oz	Daniel Fuks	2017-2115	E	503	5050	3	Heavy Residue	2		7	בקיים	Vicieae	פסיג	cotyledon	פרפרניים	Fabaceae	5	3	MNI=5
NZN-142	Nitzana	Tepper and Bar-Oz	Daniel Fuks	2017-2116	E	503	5050	3	Heavy Residue	2		8	בלתי						1	1
NZN-142	Nitzana	Tepper and Bar-Oz	Daniel Fuks	2017-2117	E	503	5050	3	Heavy Residue	2		9	בלתי		קליפה						אולי צנובר
NZN-142	Nitzana	Tepper and Bar-Oz	Daniel Fuks	2017-2118	E	503	5050	3	Heavy Residue	2		10	בלתי-שונות
NZN-142	Nitzana	Tepper and Bar-Oz	Daniel Fuks	2017-2119	E	503	5050	3	Heavy Residue	2		11	גללים
NZN-143	Nitzana	Tepper and Bar-Oz	Daniel Fuks	2017-2120	E	504	5069	3	Light Fraction	2	1	1	שעורה	Hordeum	גרגיר	grain	דגניים	Gramineae	21	21	ועוד 11 קצות שבר גרגיר	טיפוסים שונים	לוודא שהכל שעורה
NZN-143	Nitzana	Tepper and Bar-Oz	Daniel Fuks	2017-2121	E	504	5069	3	Light Fraction	2	1	2	חיטה	Triticum	גרגיר	grain	דגניים	Gramineae	16	16		טיפוסים שונים	שווה צילום
NZN-143	Nitzana	Tepper and Bar-Oz	Daniel Fuks	2017-2122	E	504	5069	3	Light Fraction	2	1	3	חיטה/שעורה	Hordeum/Triticum	שברי גרגיר	grain fragment	דגניים	Gramineae	4	4	ועוד כמה שברים
NZN-143	Nitzana	Tepper and Bar-Oz	Daniel Fuks	2017-2123	E	504	5069	3	Light Fraction	2	3	4	גפן	Vitis vinifera	חרצן	pip	גפניים	Vitaceae	7	7
NZN-143	Nitzana	Tepper and Bar-Oz	Daniel Fuks	2017-2124	E	504	5069	3	Light Fraction	2	1	5			חלקי שדרה	rachis fragments	דגניים	Gramineae	2	2		2 טיפוסים
NZN-143	Nitzana	Tepper and Bar-Oz	Daniel Fuks	2017-2125	E	504	5069	3	Light Fraction	2	1	6			פרקי גבעול	culm nodes	דגניים	Gramineae	31	31	מתוכם 9 שורשים		לוודא
NZN-143	Nitzana	Tepper and Bar-Oz	Daniel Fuks	2017-2126	E	504	5069	3	Light Fraction	2	3	7	גפן	Vitis vinifera	עוקץ	pedicel	גפניים	Vitaceae	1	1			לוודא
NZN-143	Nitzana	Tepper and Bar-Oz	Daniel Fuks	2017-2127	E	504	5069	3	Light Fraction	2	3	8	רימון מצוי	Punica granatum	זרע	seed	רימוניים	Lythraceae	2	2			לבדוק לגבי שניהם
NZN-143	Nitzana	Tepper and Bar-Oz	Daniel Fuks	2017-2128	E	504	5069	3	Light Fraction	2	3	9	cf. רימון	cf. Punica granatum	שבר קליפת הפרי	peel fragment	רימוניים?	Lythraceae?
NZN-143	Nitzana	Tepper and Bar-Oz	Daniel Fuks	2017-2129	E	504	5069	3	Light Fraction	2	2	10	עדשה תרבותית	Lens culinaris	זרע	seed	פרפרניים	Fabaceae	6	6
NZN-143	Nitzana	Tepper and Bar-Oz	Daniel Fuks	2017-2130	E	504	5069	3	Light Fraction	2	2	11	בקיים	Vicieae	זרע	seed	פרפרניים	Fabaceae	4	4	כנראה טופח וכרשינה
NZN-143	Nitzana	Tepper and Bar-Oz	Daniel Fuks	2017-2131	E	504	5069	3	Light Fraction	2	2	12	גרגרינית החילבה	Trigonella foenum-graecum/berythea	זרע	seed	פרפרניים	Fabaceae	3	3
NZN-143	Nitzana	Tepper and Bar-Oz	Daniel Fuks	2017-2132	E	504	5069	3	Light Fraction	2		13	להגדרה בהמשך						1	1	יואל ראה והחזיר
NZN-143	Nitzana	Tepper and Bar-Oz	Daniel Fuks	2017-2133	E	504	5069	3	Light Fraction	2	1	14	cf. עוקצר מצוי	cf. Brachypodium distachyon	גרגיר	grain	דגניים	Gramineae	1	1
NZN-143	Nitzana	Tepper and Bar-Oz	Daniel Fuks	2017-2134	E	504	5069	3	Light Fraction	2		15	אמיך קוצני	Emex spinosa	פרי	fruit	ארכוביתיים	Polygonaceae
NZN-143	Nitzana	Tepper and Bar-Oz	Daniel Fuks	2017-2135	E	504	5069	3	Light Fraction	2	6	16	Salsoleae	Salsoleae	פרקי גבעול	stem fragment	סלקיים	Chenopodiaceae	1	1
NZN-143	Nitzana	Tepper and Bar-Oz	Daniel Fuks	2017-2136	E	504	5069	3	Light Fraction	2	3	17	שקד מצוי	Prunus amygdalus	שבר קליפה	endocarp fragment	ורדיים	Rosaceae	1	1
NZN-143	Nitzana	Tepper and Bar-Oz	Daniel Fuks	2017-2137	E	504	5069	3	Light Fraction	2		18	רימון?		קליפה							שבר קליפת זית?
NZN-143	Nitzana	Tepper and Bar-Oz	Daniel Fuks	2017-2138	E	504	5069	3	Light Fraction	2		19	תמר??									השווה לקליפות בכל מקום בו כתוב "תמר??"
NZN-143	Nitzana	Tepper and Bar-Oz	Daniel Fuks	2017-2139	E	504	5069	3	Light Fraction	2	7	20	בלתי-שונות
NZN-143	Nitzana	Tepper and Bar-Oz	Daniel Fuks	2017-2140	E	504	5069	3	Light Fraction	2	7	21	גללים?								יש עם דגן בפנים
NZN-143	Nitzana	Tepper and Bar-Oz	Daniel Fuks	2017-2141	E	504	5069	3	Light Fraction	2	8	22	גללים
NZN-143	Nitzana	Tepper and Bar-Oz	Daniel Fuks	2017-2142	E	504	5069	3	Light Fraction	2	8	23	בד
NZN-144	Nitzana	Tepper and Bar-Oz	Daniel Fuks	2017-2143	E	504	5069	3	Heavy Residue	2	1	1	שעורה	Hordeum	גרגיר	grain	דגניים	Gramineae	5	4	MNI=5
NZN-144	Nitzana	Tepper and Bar-Oz	Daniel Fuks	2017-2144	E	504	5069	3	Heavy Residue	2	1	2	חיטה	Triticum	גרגיר	grain	דגניים	Gramineae	1	1
NZN-144	Nitzana	Tepper and Bar-Oz	Daniel Fuks	2017-2145	E	504	5069	3	Heavy Residue	2	1	3	חיטה/שעורה	Hordeum/Triticum	שברי גרגיר	grain fragment	דגניים	Gramineae	4	4
NZN-144	Nitzana	Tepper and Bar-Oz	Daniel Fuks	2017-2146	E	504	5069	3	Heavy Residue	2	3	4	גפן	Vitis vinifera	חרצן	pip	גפניים	Vitaceae	4	4
NZN-144	Nitzana	Tepper and Bar-Oz	Daniel Fuks	2017-2147	E	504	5069	3	Heavy Residue	2	1	5			חלקי שדרה	rachis fragments	דגניים	Gramineae
NZN-144	Nitzana	Tepper and Bar-Oz	Daniel Fuks	2017-2148	E	504	5069	3	Heavy Residue	2	3	6	זית	Olea europaea	שבר	fragment	זיתיים	Oleaceae	1	1
NZN-144	Nitzana	Tepper and Bar-Oz	Daniel Fuks	2017-2149	E	504	5069	3	Heavy Residue	2	3	7	תמר	Phoenix dactylifera	שבר גלעין	stone fragment	דקליים	Palmae	2	2	לפי MNI- 4 קצוות
NZN-144	Nitzana	Tepper and Bar-Oz	Daniel Fuks	2017-2150	E	504	5069	3	Heavy Residue	2	3	8	cf. רימון	cf. Punica granatum	שבר קליפת הפרי	rind fragment	רימוניים?	Lythraceae?
NZN-144	Nitzana	Tepper and Bar-Oz	Daniel Fuks	2017-2151	E	504	5069	3	Heavy Residue	2	2	9	עדשה	Lens culinaris	זרע ופסיג	seed and cotyledon	פרפרניים	Fabaceae	2	2
NZN-144	Nitzana	Tepper and Bar-Oz	Daniel Fuks	2017-2152	E	504	5069	3	Heavy Residue	2	2	10	בקיית הכרשינה	Vicia ervilia	פסיג	cotyledon	פרפרניים	Fabaceae	1	1
NZN-144	Nitzana	Tepper and Bar-Oz	Daniel Fuks	2017-2153	E	504	5069	3	Heavy Residue	2	2	11	בקיה/טופח	Vicia/Lathyrus	זרע	seed	פרפרניים	Fabaceae	6	6	שני פסיגים
NZN-144	Nitzana	Tepper and Bar-Oz	Daniel Fuks	2017-2154	E	504	5069	3	Heavy Residue	2	3	12	cf. חרוב מצוי	cf. Ceratonia siliqua
NZN-144	Nitzana	Tepper and Bar-Oz	Daniel Fuks	2017-2155	E	504	5069	3	Heavy Residue	2		13	בלתי
NZN-144	Nitzana	Tepper and Bar-Oz	Daniel Fuks	2017-2156	E	504	5069	3	Heavy Residue	2		14	סילון?	Zilla?
NZN-144	Nitzana	Tepper and Bar-Oz	Daniel Fuks	2017-2157	E	504	5069	3	Heavy Residue	2	3	15	שקד מצוי	Prunus amygdalus	שבר קליפה	endocarp fragment	ורדיים	Rosaceae	1	1
NZN-144	Nitzana	Tepper and Bar-Oz	Daniel Fuks	2017-2158	E	504	5069	3	Heavy Residue	2	7	16	בלתי		שברים וקליפות						אולי יש כאן של קליפה של צנובר
NZN-144	Nitzana	Tepper and Bar-Oz	Daniel Fuks	2017-2159	E	504	5069	3	Heavy Residue	2	7	17	ציפה? גללים?								השווה ל- NZN-143-21
NZN-144	Nitzana	Tepper and Bar-Oz	Daniel Fuks	2017-2160	E	504	5069	3	Heavy Residue	2	8	18	גללים
NZN-145	Nitzana	Tepper and Bar-Oz	Daniel Fuks	2017-2161	E	505	5079	3	Light Fraction	2	1	1	שעורה	Hordeum	גרגיר	grain	דגניים	Gramineae	26	26	MNI=31 with fragments
NZN-145	Nitzana	Tepper and Bar-Oz	Daniel Fuks	2017-2162	E	505	5079	3	Light Fraction	2	1	2	חיטה	Triticum	גרגיר	grain	דגניים	Gramineae	7	7	Mni=10 with fragments
NZN-145	Nitzana	Tepper and Bar-Oz	Daniel Fuks	2017-2163	E	505	5079	3	Light Fraction	2	1	3	חיטה/שעורה	Hordeum/Triticum	שברי גרגיר	grain fragment	דגניים	Gramineae	11	11
NZN-145	Nitzana	Tepper and Bar-Oz	Daniel Fuks	2017-2164	E	505	5079	3	Light Fraction	2	3	4	גפן	Vitis vinifera	חרצן	pip	גפניים	Vitaceae	9	9
NZN-145	Nitzana	Tepper and Bar-Oz	Daniel Fuks	2017-2165	E	505	5079	3	Light Fraction	2	1	5			חלקי שדרה	rachis fragments	דגניים	Gramineae	4	4	לחלק לפי מינים
NZN-145	Nitzana	Tepper and Bar-Oz	Daniel Fuks	2017-2166	E	505	5079	3	Light Fraction	2	1	6			פרקי גבעול	culm nodes	דגניים	Gramineae	16	16	4 שורשים מוכם
NZN-145	Nitzana	Tepper and Bar-Oz	Daniel Fuks	2017-2167	E	505	5079	3	Light Fraction	2	3	7	??רימון	Punica granatum?	זרע	seed			1	1		בצורה הכללית כן אבל קצת משונה ולא כל המאפיינים נמצאים
NZN-145	Nitzana	Tepper and Bar-Oz	Daniel Fuks	2017-2168	E	505	5079	3	Light Fraction	2	3	8	רימון מצוי	Punica granatum	שבר קליפת הפרי	peel fragment	רימוניים?	Lythraceae?
NZN-145	Nitzana	Tepper and Bar-Oz	Daniel Fuks	2017-2169	E	505	5079	3	Light Fraction	2	2	9	בקיים	Vicieae	זרע	seed	פרפרניים	Fabaceae	4	4
NZN-145	Nitzana	Tepper and Bar-Oz	Daniel Fuks	2017-2170	E	505	5079	3	Light Fraction	2	2	10	בקיים	Vicieae	זרע	seed	פרפרניים	Fabaceae	1	1
NZN-145	Nitzana	Tepper and Bar-Oz	Daniel Fuks	2017-2171	E	505	5079	3	Light Fraction	2	2	11	גרגרנית?	Trigonella?	זרע	seed	פרפרניים	Fabaceae	2	2
NZN-145	Nitzana	Tepper and Bar-Oz	Daniel Fuks	2017-2172	E	505	5079	3	Light Fraction	2	1	12	זון?		גרגיר	grain	דגניים	Gramineae	1	1
NZN-145	Nitzana	Tepper and Bar-Oz	Daniel Fuks	2017-2173	E	505	5079	3	Light Fraction	2	1	13	cf. עוקצר מצוי	cf. Brachypodium distachyon	גרגיר	grain	דגניים	Gramineae	2	2
NZN-145	Nitzana	Tepper and Bar-Oz	Daniel Fuks	2017-2174	E	505	5079	3	Light Fraction	2	1	14	דגני להגדרה		גרגיר	grain	דגניים	Gramineae	1	1
NZN-145	Nitzana	Tepper and Bar-Oz	Daniel Fuks	2017-2175	E	505	5079	3	Light Fraction	2		15	סלק	Beta	פרודה		סלקיים	Chenopodiaceae	1	1
NZN-145	Nitzana	Tepper and Bar-Oz	Daniel Fuks	2017-2176	E	505	5079	3	Light Fraction	2		16	דלועי/פנים רימון
NZN-145	Nitzana	Tepper and Bar-Oz	Daniel Fuks	2017-2177	E	505	5079	3	Light Fraction	2	8	17	סיבים
NZN-145	Nitzana	Tepper and Bar-Oz	Daniel Fuks	2017-2178	E	505	5079	3	Light Fraction	2	7	18	בלתי-שונות
NZN-145	Nitzana	Tepper and Bar-Oz	Daniel Fuks	2017-2179	E	505	5079	3	Light Fraction	2	8	19	גללים
NZN-146	Nitzana	Tepper and Bar-Oz	Daniel Fuks	2017-2180	E	505	5079	3	Heavy Residue	2	1	1	שעורה	Hordeum	גרגיר	grain	דגניים	Gramineae	2	2
NZN-146	Nitzana	Tepper and Bar-Oz	Daniel Fuks	2017-2181	E	505	5079	3	Heavy Residue	2	1	2	חיטה	Triticum	גרגיר	grain	דגניים	Gramineae	1	1
NZN-146	Nitzana	Tepper and Bar-Oz	Daniel Fuks	2017-2182	E	505	5079	3	Heavy Residue	2	1	3	חיטה/שעורה	Hordeum/Triticum	שברי גרגיר	grain fragment	דגניים	Gramineae	2	2
NZN-146	Nitzana	Tepper and Bar-Oz	Daniel Fuks	2017-2183	E	505	5079	3	Heavy Residue	2	3	4	גפן	Vitis vinifera	חרצן	pip	גפניים	Vitaceae	1	1
NZN-146	Nitzana	Tepper and Bar-Oz	Daniel Fuks	2017-2184	E	505	5079	3	Heavy Residue	2	2	5	עדשה		זרע	seed	פרפרניים	Fabaceae	2	2	4 פסיגים
NZN-146	Nitzana	Tepper and Bar-Oz	Daniel Fuks	2017-2185	E	505	5079	3	Heavy Residue	2	3	6	זית	Olea europaea	שבר גלעין	stone fragment	זיתיים	Oleaceae	1	1
NZN-146	Nitzana	Tepper and Bar-Oz	Daniel Fuks	2017-2186	E	505	5079	3	Heavy Residue	2	3	7	תמר?	Phoenix dactylifera	שבר וגלעין	stone and fragment	דקליים	Palmae	2	2
NZN-146	Nitzana	Tepper and Bar-Oz	Daniel Fuks	2017-2187	E	505	5079	3	Heavy Residue	2	7	8	בלתי-שונות
NZN-147	Nitzana	Tepper and Bar-Oz	Daniel Fuks	2017-2188	E	507	5088	3	Light Fraction	2	1	1	שעורה	Hordeum	גרגיר	grain	דגניים	Gramineae	10	10
NZN-147	Nitzana	Tepper and Bar-Oz	Daniel Fuks	2017-2189	E	507	5088	3	Light Fraction	2	1	2	חיטה	Triticum	גרגיר	grain	דגניים	Gramineae	6	6
NZN-147	Nitzana	Tepper and Bar-Oz	Daniel Fuks	2017-2190	E	507	5088	3	Light Fraction	2	1	3	חיטה/שעורה	Hordeum/Triticum	גרגיר ושברי גרגיר	grain and fragment	דגניים	Gramineae	3	3
NZN-147	Nitzana	Tepper and Bar-Oz	Daniel Fuks	2017-2191	E	507	5088	3	Light Fraction	2	3	4	גפן	Vitis vinifera	חרצן	pip	גפניים	Vitaceae	16	16
NZN-147	Nitzana	Tepper and Bar-Oz	Daniel Fuks	2017-2192	E	507	5088	3	Light Fraction	2	1	5			פרקי גבעול	culm nodes	דגניים	Gramineae	8	8	אחד שורש
NZN-147	Nitzana	Tepper and Bar-Oz	Daniel Fuks	2017-2193	E	507	5088	3	Light Fraction	2	3	6	גפן	Vitis vinifera	עוקץ	pedicel	גפניים	Vitaceae	1	1
NZN-147	Nitzana	Tepper and Bar-Oz	Daniel Fuks	2017-2194	E	507	5088	3	Light Fraction	2	3	7	רימון מצוי	Punica granatum	זרע	seed	רימוניים	Lythraceae	6	6
NZN-147	Nitzana	Tepper and Bar-Oz	Daniel Fuks	2017-2195	E	507	5088	3	Light Fraction	2	3	8	רימון??	Punica granatum??	שבר קליפת הפרי	peel fragment	רימוניים?	Lythraceae?			וציפה? השווה לאחד מכוסה לעיל
NZN-147	Nitzana	Tepper and Bar-Oz	Daniel Fuks	2017-2196	E	507	5088	3	Light Fraction	2	2	9	בקיית הכרשינה	Vicia ervilia	זרע	seed	פרפרניים	Fabaceae	2	2
NZN-147	Nitzana	Tepper and Bar-Oz	Daniel Fuks	2017-2197	E	507	5088	3	Light Fraction	2	2	10	קטנית קטנה		זרע	seed	פרפרניים	Fabaceae	1	1	קטנה ועגולה		לבדוק שכולם רימון
NZN-147	Nitzana	Tepper and Bar-Oz	Daniel Fuks	2017-2198	E	507	5088	3	Light Fraction	2	2	11	בלתי		זרע	seed			1	1	קטנה ועגולה
NZN-147	Nitzana	Tepper and Bar-Oz	Daniel Fuks	2017-2199	E	507	5088	3	Light Fraction	2	3	12	זית	Olea europaea	שבר גלעין	stone fragment	זיתיים	Oleaceae	1	1
NZN-147	Nitzana	Tepper and Bar-Oz	Daniel Fuks	2017-2200	E	507	5088	3	Light Fraction	2	3	13	תמר	Phoenix dactylifera	שבר גלעין	stone fragment	דקליים	Palmae	1	1
NZN-147	Nitzana	Tepper and Bar-Oz	Daniel Fuks	2017-2201	E	507	5088	3	Light Fraction	2	3	14	בלתי									אפרסק??	חתיכה אחת מתחברת לאפרסק אך אי אפשר ככה להגדיר
NZN-147	Nitzana	Tepper and Bar-Oz	Daniel Fuks	2017-2202	E	507	5088	3	Light Fraction	2	3	15	תאנה?	Ficus carica?	ציפה ואגוזיות	pulp and nutlets
NZN-147	Nitzana	Tepper and Bar-Oz	Daniel Fuks	2017-2203	E	507	5088	3	Light Fraction	2	1	16	דגני להגדרה		גרגיר	grain	דגניים	Gramineae	1	1
NZN-147	Nitzana	Tepper and Bar-Oz	Daniel Fuks	2017-2204	E	507	5088	3	Light Fraction	2	7	17	בלתי-שונות								לחבר בהמשך
NZN-147	Nitzana	Tepper and Bar-Oz	Daniel Fuks	2017-2205	E	507	5088	3	Light Fraction	2	8	18	גללים
NZN-148	Nitzana	Tepper and Bar-Oz	Daniel Fuks	2017-2206	E	507	5088	3	Heavy Residue	2	1	1	שעורה	Hordeum	גרגיר	grain	דגניים	Gramineae	4	4
NZN-148	Nitzana	Tepper and Bar-Oz	Daniel Fuks	2017-2207	E	507	5088	3	Heavy Residue	2	1	2	חיטה	Triticum	גרגיר	grain	דגניים	Gramineae	1	1
NZN-148	Nitzana	Tepper and Bar-Oz	Daniel Fuks	2017-2208	E	507	5088	3	Heavy Residue	2	1	3	חיטה/שעורה	Hordeum/Triticum	גרגיר ושברי גרגיר	grain and fragment	דגניים	Gramineae	1	1
NZN-148	Nitzana	Tepper and Bar-Oz	Daniel Fuks	2017-2209	E	507	5088	3	Heavy Residue	2	3	4	גפן	Vitis vinifera	חרצן	pip	גפניים	Vitaceae	3	3
NZN-148	Nitzana	Tepper and Bar-Oz	Daniel Fuks	2017-2210	E	507	5088	3	Heavy Residue	2	1	5			פרקי גבעול	culm nodes	דגניים	Gramineae	1	1
NZN-148	Nitzana	Tepper and Bar-Oz	Daniel Fuks	2017-2211	E	507	5088	3	Heavy Residue	2		6	זית	Olea europaea	שבר גלעין	stone fragment	זיתיים	Oleaceae	1	1
NZN-148	Nitzana	Tepper and Bar-Oz	Daniel Fuks	2017-2212	E	507	5088	3	Heavy Residue	2		7	תמר	Phoenix dactylifera	שבר גלעין	stone fragment	דקליים	Palmae	1	1
NZN-148	Nitzana	Tepper and Bar-Oz	Daniel Fuks	2017-2213	E	507	5088	3	Heavy Residue	2		8	שקד מצוי	Prunus amygdalus	שבר גלעין	endocarp fragment	ורדיים	Rosaceae	1	1
NZN-148	Nitzana	Tepper and Bar-Oz	Daniel Fuks	2017-2214	E	507	5088	3	Heavy Residue	2		9	אורן הצנובר	Pinus pinea	שבר קליפת הזרע	seed coat fragment	אורניים	Pineaceae
NZN-148	Nitzana	Tepper and Bar-Oz	Daniel Fuks	2017-2215	E	507	5088	3	Heavy Residue	2		10	תמר?		שבר גלעין?				2	2
NZN-148	Nitzana	Tepper and Bar-Oz	Daniel Fuks	2017-2216	E	507	5088	3	Heavy Residue	2		11	בלתי		ציפה
NZN-148	Nitzana	Tepper and Bar-Oz	Daniel Fuks	2017-2217	E	507	5088	3	Heavy Residue	2		12	בלתי
NZN-148	Nitzana	Tepper and Bar-Oz	Daniel Fuks	2017-2218	E	507	5088	3	Heavy Residue	2		13	בלתי
NZN-149	Nitzana	Tepper and Bar-Oz	Daniel Fuks	2017-2219	E	507	5089	3	Light Fraction	2	1	1	שעורה	Hordeum	גרגיר	grain	דגניים	Gramineae	9	9
NZN-149	Nitzana	Tepper and Bar-Oz	Daniel Fuks	2017-2220	E	507	5089	3	Light Fraction	2	1	2	חיטה	Triticum	גרגיר	grain	דגניים	Gramineae	14	14
NZN-149	Nitzana	Tepper and Bar-Oz	Daniel Fuks	2017-2221	E	507	5089	3	Light Fraction	2	1	3	חיטה/שעורה	Hordeum/Triticum	גרגיר ושברי גרגיר	grain and fragment	דגניים	Gramineae	4	2	MNI=4 'with frags
NZN-149	Nitzana	Tepper and Bar-Oz	Daniel Fuks	2017-2222	E	507	5089	3	Light Fraction	2	3	4	גפן	Vitis vinifera	חרצן	pip	גפניים	Vitaceae	13	13
NZN-149	Nitzana	Tepper and Bar-Oz	Daniel Fuks	2017-2223	E	507	5089	3	Light Fraction	2	1	5			פרקי גבעול	culm nodes	דגניים	Gramineae	7	7	2 שורשים
NZN-149	Nitzana	Tepper and Bar-Oz	Daniel Fuks	2017-2224	E	507	5089	3	Light Fraction	2	3	6	רימון	Punica granatum	זרע	seed	רימוניים	Lythraceae	4	4	אחד ודאי, השאר מצטרפים
NZN-149	Nitzana	Tepper and Bar-Oz	Daniel Fuks	2017-2225	E	507	5089	3	Light Fraction	2	3	7	רימון??	Punica granatum??	שבר קליפת הפרי	peel fragment	רימוניים?	Lythraceae?			לבדק
NZN-149	Nitzana	Tepper and Bar-Oz	Daniel Fuks	2017-2226	E	507	5089	3	Light Fraction	2		8	אבטיח הפקועה	Citrullus colocynthis	זרע	seed	דלועים	Cucurbitaceae
NZN-149	Nitzana	Tepper and Bar-Oz	Daniel Fuks	2017-2227	E	507	5089	3	Light Fraction	2	2	9	עדשה	Lens culinaris	זרע	seed	פרפרניים	Fabaceae	1	1	קטנה ועגולה
NZN-149	Nitzana	Tepper and Bar-Oz	Daniel Fuks	2017-2228	E	507	5089	3	Light Fraction	2	2	10	בלתי		זרע	seed			1	1
NZN-149	Nitzana	Tepper and Bar-Oz	Daniel Fuks	2017-2229	E	507	5089	3	Light Fraction	2	2	11	זנב-עקרב שיכני	Scorpiurus muricatus	זרע	seed	פרפרניים	Fabaceae	1	1
NZN-149	Nitzana	Tepper and Bar-Oz	Daniel Fuks	2017-2230	E	507	5089	3	Light Fraction	2		12	אמיך קוצני	Emex spinosa	פרי	fruit	ארכוביתיים	Polygonaceae	1	1
NZN-149	Nitzana	Tepper and Bar-Oz	Daniel Fuks	2017-2231	E	507	5089	3	Light Fraction	2	3	13	בלתי		שבר גלעין						לצילום	אפרסק? שקד?
NZN-149	Nitzana	Tepper and Bar-Oz	Daniel Fuks	2017-2232	E	507	5089	3	Light Fraction	2	7	14	בלתי
NZN-149	Nitzana	Tepper and Bar-Oz	Daniel Fuks	2017-2233	E	507	5089	3	Light Fraction	2	7	15	בלתי
NZN-149	Nitzana	Tepper and Bar-Oz	Daniel Fuks	2017-2234	E	507	5089	3	Light Fraction	2	7	16	בלתי
NZN-149	Nitzana	Tepper and Bar-Oz	Daniel Fuks	2017-2235	E	507	5089	3	Light Fraction	2	8	17	גללים וציפה
NZN-150	Nitzana	Tepper and Bar-Oz	Daniel Fuks	2017-2236	E	507	5089	3	Heavy Residue	2	1	1	שעורה	Hordeum	גרגיר	grain	דגניים	Gramineae	2	2
NZN-150	Nitzana	Tepper and Bar-Oz	Daniel Fuks	2017-2237	E	507	5089	3	Heavy Residue	2	1	2	חיטה	Triticum	גרגיר	grain	דגניים	Gramineae	2	2
NZN-150	Nitzana	Tepper and Bar-Oz	Daniel Fuks	2017-2238	E	507	5089	3	Heavy Residue	2	1	3	חיטה/שעורה	Hordeum/Triticum	גרגיר ושברי גרגיר	grain and fragment	דגניים	Gramineae	5	5	מאד שרוף, ךא הכל בטוח
NZN-150	Nitzana	Tepper and Bar-Oz	Daniel Fuks	2017-2239	E	507	5089	3	Heavy Residue	2	3	4	גפן	Vitis vinifera	חרצן	pip	גפניים	Vitaceae	3	3
NZN-150	Nitzana	Tepper and Bar-Oz	Daniel Fuks	2017-2240	E	507	5089	3	Heavy Residue	2		5	זית	Olea europaea	שבר גלעין	stone fragment	זיתיים	Oleaceae	1	1
NZN-150	Nitzana	Tepper and Bar-Oz	Daniel Fuks	2017-2241	E	507	5089	3	Heavy Residue	2		6	תמר	Phoenix dactylifera	שבר גלעין	stone fragment	דקליים	Palmae	1	1
NZN-150	Nitzana	Tepper and Bar-Oz	Daniel Fuks	2017-2242	E	507	5089	3	Heavy Residue	2		7	שקד מצוי	Prunus amygdalus	שבר קליפה	endocarp fragment	ורדיים	Rosaceae
NZN-150	Nitzana	Tepper and Bar-Oz	Daniel Fuks	2017-2243	E	507	5089	3	Heavy Residue	2		8	cf. אורן הצנובר	cf. Pinus pinea	שבר קליפת הזרע	seed coat fragment	אורניים	Pineaceae
NZN-150	Nitzana	Tepper and Bar-Oz	Daniel Fuks	2017-2244	E	507	5089	3	Heavy Residue	2		9	בלתי		זרע?
NZN-150	Nitzana	Tepper and Bar-Oz	Daniel Fuks	2017-2245	E	507	5089	3	Heavy Residue	2		10	בלתי
NZN-150	Nitzana	Tepper and Bar-Oz	Daniel Fuks	2017-2246	E	507	5089	3	Heavy Residue	2		11	בלתי-שונות
NZN-150	Nitzana	Tepper and Bar-Oz	Daniel Fuks	2017-2247	E	507	5089	3	Heavy Residue	2		12	גללים								אולי לא גלל אלא אדמה עם דפוס של קש
NZN-151	Nitzana	Tepper and Bar-Oz	Daniel Fuks	2017-2248	E	509	5106	3	Light Fraction	2	1	1	שעורה	Hordeum	גרגיר	grain	דגניים	Gramineae	9	9	בדוק
NZN-151	Nitzana	Tepper and Bar-Oz	Daniel Fuks	2017-2249	E	509	5106	3	Light Fraction	2	1	2	חיטה	Triticum	גרגיר	grain	דגניים	Gramineae	15	15	בדוק
NZN-151	Nitzana	Tepper and Bar-Oz	Daniel Fuks	2017-2250	E	509	5106	3	Light Fraction	2	1	3	חיטה/שעורה	Hordeum/Triticum	גרגיר ושברי גרגיר	grain and fragment	דגניים	Gramineae	4	4	אחד ספק זון ספק שעורה
NZN-151	Nitzana	Tepper and Bar-Oz	Daniel Fuks	2017-2251	E	509	5106	3	Light Fraction	2	1	4	חיטה טטרפלוידית	Triticum turgidum s.l.	חלקי שדרה	rachis fragments	דגניים	Gramineae	7	7	1with 4segments, 3 with 3, 2 with 2, 1 with 1. Includes 3 basal rachis segments
NZN-151	Nitzana	Tepper and Bar-Oz	Daniel Fuks	2017-2252	E	509	5106	3	Light Fraction	2	1	5			פרקי גבעול	culm nodes	דגניים	Gramineae	48	48	לא כולל שורשים
NZN-151	Nitzana	Tepper and Bar-Oz	Daniel Fuks	2017-2253	E	509	5106	3	Light Fraction	2	1	6			שורשי דגן	roots	דגניים	Gramineae	18	18	עם שורשים
NZN-151	Nitzana	Tepper and Bar-Oz	Daniel Fuks	2017-2254	E	509	5106	3	Light Fraction	2	1	7			שברי מלען	awn fragments	דגניים	Gramineae	2	2	אחד לא בטוח
NZN-151	Nitzana	Tepper and Bar-Oz	Daniel Fuks	2017-2255	E	509	5106	3	Light Fraction	2	3	8	גפן	Vitis vinifera	עוקץ	pedicel	גפניים	Vitaceae	1	1
NZN-151	Nitzana	Tepper and Bar-Oz	Daniel Fuks	2017-2256	E	509	5106	3	Light Fraction	2	3	9	cf. cf. cf. אלון התבור		בסיס בלוט	hilum					בטיפול
NZN-151	Nitzana	Tepper and Bar-Oz	Daniel Fuks	2017-2257	E	509	5106	3	Light Fraction	2	3	10	זית	Olea europaea	גלעין	stone	זיתיים	Oleaceae	1	1
NZN-151	Nitzana	Tepper and Bar-Oz	Daniel Fuks	2017-2258	E	509	5106	3	Light Fraction	2	2	11	בקיה מצויה/צרפתית	Vicia peregrina/narbonensis	זרע	seed	פרפרניים	Fabaceae	1	1
NZN-151	Nitzana	Tepper and Bar-Oz	Daniel Fuks	2017-2259	E	509	5106	3	Light Fraction	2	2	12	בקיים	Vicieae	פסיג	cotyledon	פרפרניים	Fabaceae	1	1	נראה כרשינה
NZN-151	Nitzana	Tepper and Bar-Oz	Daniel Fuks	2017-2260	E	509	5106	3	Light Fraction	2	2	13	כדן/זמזומית?		זרע	seed	שושניים?		1	1	לחבר בהמשך
NZN-151	Nitzana	Tepper and Bar-Oz	Daniel Fuks	2017-2261	E	509	5106	3	Light Fraction	2	1	14	עוקצר מצוי	Brachypodium distachyon	גרגיר	grain	דגניים	Gramineae	2	2	מח' 2 עמ' 109, אחד מצטרף
NZN-151	Nitzana	Tepper and Bar-Oz	Daniel Fuks	2017-2262	E	509	5106	3	Light Fraction	2	3	15	פיקוס התאנה	Ficus carica	אגוזית	nutlet	Moraceae	תותיים	1	1	היה מעט חומר קטן מ-2מ"מ שלא סונן היטב. הגדרה על בסיס גודל, צורה ודגם קליפת האגוזית בהשוואה לפרפרט "תאנה מקומית"	צורה סבירה, דגם בעייתי. לחבר בהמשך
NZN-151	Nitzana	Tepper and Bar-Oz	Daniel Fuks	2017-2263	E	509	5106	3	Light Fraction	2		16	בלתי						1	1	יש סיכוי להל-cardamom
NZN-151	Nitzana	Tepper and Bar-Oz	Daniel Fuks	2017-2264	E	509	5106	3	Light Fraction	2		17	זון משכר	Lolium temulentum	גרגיר	grain	דגניים	Gramineae	1	1
NZN-151	Nitzana	Tepper and Bar-Oz	Daniel Fuks	2017-2265	E	509	5106	3	Light Fraction	2	7	18	בלתי-שונות						8	8
NZN-151	Nitzana	Tepper and Bar-Oz	Daniel Fuks	2017-2266	E	509	5106	3	Light Fraction	2	8	19	בד וקשקש
NZN-151	Nitzana	Tepper and Bar-Oz	Daniel Fuks	2017-2267	E	509	5106	3	Light Fraction	2		20	גללים								לחפש תאנים
NZN-151	Nitzana	Tepper and Bar-Oz	Daniel Fuks	2017-2268	E	509	5106	3	Light Fraction	2	8	21	גפן	Vitis vinifera	עוקץ	pedicel	גפניים	Vitaceae	1	1
NZN-151	Nitzana	Tepper and Bar-Oz	Daniel Fuks	2017-2269	E	509	5106	3	Light Fraction	1		22	שעורה שש-טורית	Hordeum vulgare subsp. hexastichum	פרק ציר שיבולת	rachis fragments	דגניים	Gramineae	4	4
NZN-151	Nitzana	Tepper and Bar-Oz	Daniel Fuks	2017-2270	E	509	5106	3	Light Fraction	1		23	שעורה דו-טורית/התבור	Hordeum vulgare subsp. distichum/spontaneum	פרק ציר שיבולת	rachis fragments	דגניים	Gramineae	15	15
NZN-151	Nitzana	Tepper and Bar-Oz	Daniel Fuks	2017-2271	E	509	5106	3	Light Fraction	1		24	שעורה דו-טורית/התבור	Hordeum vulgare subsp. distichum/spontaneum	פרק ציר שיבולת עם גלל	rachis fragment with dung matrix	דגניים	Gramineae	1	1
NZN-151	Nitzana	Tepper and Bar-Oz	Daniel Fuks	2017-2272	E	509	5106	3	Light Fraction	1		25	שעורה	Hordeum vulgare	פרק ציר שיבולת	rachis fragments	דגניים	Gramineae	14	14
NZN-151	Nitzana	Tepper and Bar-Oz	Daniel Fuks	2017-2273	E	509	5106	3	Light Fraction	1		26	שעורה	Hordeum vulgare	פרק ציר שיבולת עם גלל	rachis fragment with dung matrix	דגניים	Gramineae	3	3
NZN-151	Nitzana	Tepper and Bar-Oz	Daniel Fuks	2017-2274	E	509	5106	3	Light Fraction	1		27	חיטה טטרפלוידית	Triticum turgidum s.l.	פרק ציר שיבולת	rachis fragments	דגניים	Gramineae	5	5
NZN-151	Nitzana	Tepper and Bar-Oz	Daniel Fuks	2017-2275	E	509	5106	3	Light Fraction	1		28	חיטת הלחם	Triticum aestivum s.l.	פרק ציר שיבולת	rachis fragments	דגניים	Gramineae	5	5
NZN-151	Nitzana	Tepper and Bar-Oz	Daniel Fuks	2017-2276	E	509	5106	3	Light Fraction	1		29	חיטת הלחם	Triticum aestivum s.l.	פרק קצה שיבולת	rachis tail fragments	דגניים	Gramineae	1	1
NZN-151	Nitzana	Tepper and Bar-Oz	Daniel Fuks	2017-2277	E	509	5106	3	Light Fraction	1		30	חיטה	Triticum sp.	פרק ציר שיבולת	rachis fragments	דגניים	Gramineae	94	94
NZN-151	Nitzana	Tepper and Bar-Oz	Daniel Fuks	2017-2278	E	509	5106	3	Light Fraction	1		31	cf. חיטה	cf. Triticum sp.	פרק קצה שיבולת	rachis tail fragments	דגניים	Gramineae	1	1
NZN-151	Nitzana	Tepper and Bar-Oz	Daniel Fuks	2017-2279	E	509	5106	3	Light Fraction	1		32	חיטה/שעורה	Hordeum/Triticum	פרק ציר שיבולת	rachis fragments	דגניים	Gramineae	29	29
NZN-151	Nitzana	Tepper and Bar-Oz	Daniel Fuks	2017-2280	E	509	5106	3	Light Fraction	1		33	חיטה/שעורה	Hordeum/Triticum	פרק ציר שיבולת עם גלל	rachis fragment with dung matrix	דגניים	Gramineae	2	2
NZN-151	Nitzana	Tepper and Bar-Oz	Daniel Fuks	2017-2281	E	509	5106	3	Light Fraction	1		34	חיטה/שעורה	Hordeum/Triticum	בסיס ציר שיבולת	first rachis segment	דגניים	Gramineae	4	4
NZN-151	Nitzana	Tepper and Bar-Oz	Daniel Fuks	2017-2282	E	509	5106	3	Light Fraction	1		35	שעורה?	cf. Hordeum	צווארון בסיס ציר שיבולת	collar and basal rachis segment	דגניים	Gramineae	2	2
NZN-151	Nitzana	Tepper and Bar-Oz	Daniel Fuks	2017-2283	E	509	5106	3	Light Fraction	1		36	חיטה?	cf. Triticum	צווארון בסיס ציר שיבולת	collar and basal rachis segment	דגניים	Gramineae	9	9
NZN-151	Nitzana	Tepper and Bar-Oz	Daniel Fuks	2017-2284	E	509	5106	3	Light Fraction	1		37	חיטה/שעורה	Hordeum/Triticum	בסיס ציר שיבולת	first rachis segment	דגניים	Gramineae	3	3
NZN-151	Nitzana	Tepper and Bar-Oz	Daniel Fuks	2017-2285	E	509	5106	3	Light Fraction	1		38	חיטה/שעורה	Hordeum/Triticum	פרק ציר שיבולת בלי מפרק	rachis internode	דגניים	Gramineae
NZN-151	Nitzana	Tepper and Bar-Oz	Daniel Fuks	2017-2286	E	509	5106	3	Light Fraction	1		39	דגני		פרק קצה שיבולת	rachis tail fragments	דגניים	Gramineae	2	2
NZN-151	Nitzana	Tepper and Bar-Oz	Daniel Fuks	2017-2287	E	509	5106	3	Light Fraction	1		40	דגניים		שרשי דגן	roots	דגניים	Gramineae	12	12
NZN-151	Nitzana	Tepper and Bar-Oz	Daniel Fuks	2017-2288	E	509	5106	3	Light Fraction	1		41			פרקי גבעול	culm nodes	דגניים	Gramineae	22	22
NZN-151	Nitzana	Tepper and Bar-Oz	Daniel Fuks	2017-2289	E	509	5106	3	Light Fraction	1		42			שברי גבעול	culm internodes	דגניים	Gramineae	20	עשרות
NZN-151	Nitzana	Tepper and Bar-Oz	Daniel Fuks	2017-2290	E	509	5106	3	Light Fraction	1		43			שברי גלומה	glume fragments	דגניים	Gramineae	20	עשרות
NZN-151	Nitzana	Tepper and Bar-Oz	Daniel Fuks	2017-2291	E	509	5106	3	Light Fraction	1		44			שברי מלען	awn fragments	דגניים	Gramineae	20	עשרות
NZN-151	Nitzana	Tepper and Bar-Oz	Daniel Fuks	2017-2292	E	509	5106	3	Light Fraction	1		45	עוקצר מצוי	Brachypodium distachyon	גרגיר	grain	דגניים	Gramineae	14	14
NZN-151	Nitzana	Tepper and Bar-Oz	Daniel Fuks	2017-2293	E	509	5106	3	Light Fraction	1		46	cf. עוקצר מצוי	cf. Brachypodium distachyon	שברי גרגיר	grain fragments	דגניים	Gramineae	22	22	ספירה לפי עוברים
NZN-151	Nitzana	Tepper and Bar-Oz	Daniel Fuks	2017-2294	E	509	5106	3	Light Fraction	1		47	שעורה תרבותית?	Hordeum cf. vulgare	גרגיר	grain	דגניים	Gramineae	2	2
NZN-151	Nitzana	Tepper and Bar-Oz	Daniel Fuks	2017-2295	E	509	5106	3	Light Fraction	1		48	שעורת העכבר	Hordeum glaucum	גרגיר	grain	דגניים	Gramineae	1	1
NZN-151	Nitzana	Tepper and Bar-Oz	Daniel Fuks	2017-2296	E	509	5106	3	Light Fraction	1		49	שעורה נימית/עכבר/החוף	Hordeum hystrix/glaucum/marinum	גרגיר	grain	דגניים	Gramineae	1	1
NZN-151	Nitzana	Tepper and Bar-Oz	Daniel Fuks	2017-2297	E	509	5106	3	Light Fraction	1		50	שעורה	Hordeum sp.	גרגיר	grain	דגניים	Gramineae	1	1
NZN-151	Nitzana	Tepper and Bar-Oz	Daniel Fuks	2017-2298	E	509	5106	3	Light Fraction	1		51	חיטה	Triticum sp.	גרגיר	grain	דגניים	Gramineae	1	1	tail grain
NZN-151	Nitzana	Tepper and Bar-Oz	Daniel Fuks	2017-2299	E	509	5106	3	Light Fraction	1		52	חפורית	Phalaris minor/paradoxa	גרגיר	grain	דגניים	Gramineae	1	1	להגדיר בהמשך
NZN-151	Nitzana	Tepper and Bar-Oz	Daniel Fuks	2017-2300	E	509	5106	3	Light Fraction	1		53	זון אשון/רב-פרחים	Lolium rigidum/multiflorum	גרגיר	grain	דגניים	Gramineae	1	1	להגדיר בהמשך
NZN-151	Nitzana	Tepper and Bar-Oz	Daniel Fuks	2017-2301	E	509	5106	3	Light Fraction	1		54	דגני		גרגיר	grain	דגניים	Gramineae	1	1	להגדיר בהמשך
NZN-151	Nitzana	Tepper and Bar-Oz	Daniel Fuks	2017-2302	E	509	5106	3	Light Fraction	1		55	זון?	cf. Lolium	גרגיר	grain	דגניים	Gramineae	1	1	להגדיר בהמשך
NZN-151	Nitzana	Tepper and Bar-Oz	Daniel Fuks	2017-2303	E	509	5106	3	Light Fraction	1		56	זון?	cf. Lolium	גרגיר	grain	דגניים	Gramineae	1	1	להגדיר בהמשך
NZN-151	Nitzana	Tepper and Bar-Oz	Daniel Fuks	2017-2304	E	509	5106	3	Light Fraction	1		57	זון?	cf. Lolium	גרגיר	grain	דגניים	Gramineae	1	1	להגדיר בהמשך
NZN-151	Nitzana	Tepper and Bar-Oz	Daniel Fuks	2017-2305	E	509	5106	3	Light Fraction	1		58	דגני		גרגיר	grain	דגניים	Gramineae	10	10	ושברים. לא להתעסק
NZN-151	Nitzana	Tepper and Bar-Oz	Daniel Fuks	2017-2306	E	509	5106	3	Light Fraction	1		59	דגני		גבעול	stem	דגניים	Gramineae	1	1
NZN-151	Nitzana	Tepper and Bar-Oz	Daniel Fuks	2017-2307	E	509	5106	3	Light Fraction	1		60	גפן	Vitis vinifera	שבר חרצן	pip fragment	גפניים	Vitaceae	1	1
NZN-151	Nitzana	Tepper and Bar-Oz	Daniel Fuks	2017-2308	E	509	5106	3	Light Fraction	1		61	פרסת הסוס	Hippocrepis unisiliquosa/multisiliquosa s.l.	זרע	seed	פרפרניים	Fabaceae	1	1
NZN-151	Nitzana	Tepper and Bar-Oz	Daniel Fuks	2017-2309	E	509	5106	3	Light Fraction	1		62	cf. תלתן	cf. Trifolium	זרע	seed	פרפרניים	Fabaceae	1	1
NZN-151	Nitzana	Tepper and Bar-Oz	Daniel Fuks	2017-2310	E	509	5106	3	Light Fraction	1		63	מתנן שעיר	Thymelaea hirsuta	עלה	leaf	מתנניים	Thymelaceae	83	83
NZN-151	Nitzana	Tepper and Bar-Oz	Daniel Fuks	2017-2311	E	509	5106	3	Light Fraction	1		64	עכנאי שרוע?	Echium cf. angustifolium	זרע	seed	זיפניים	Boraginaceae	1	1	לחזור בסוף
NZN-151	Nitzana	Tepper and Bar-Oz	Daniel Fuks	2017-2312	E	509	5106	3	Light Fraction	1		65	בר-עכנאי שיכני		זרע	seed	זיפניים	Boraginaceae	1	1
NZN-151	Nitzana	Tepper and Bar-Oz	Daniel Fuks	2017-2313	E	509	5106	3	Light Fraction	1		66	ארנבית שרועה	Arnebia decumbens	זרע	seed	זיפניים	Boraginaceae	1	1
NZN-151	Nitzana	Tepper and Bar-Oz	Daniel Fuks	2017-2314	E	509	5106	3	Light Fraction	1		67	Lithospermeae	Lithospermeae	זרע	seed	זיפניים	Boraginaceae	1	1	Flora P. Vol. 3, p. 66
NZN-151	Nitzana	Tepper and Bar-Oz	Daniel Fuks	2017-2315	E	509	5106	3	Light Fraction	1		68	אהל מצוי	Mesembryanthemum nodiflorum	יחידת הפצה	dispersal unit	חיעדיים	Aizoaceae	1	1
NZN-151	Nitzana	Tepper and Bar-Oz	Daniel Fuks	2017-2316	E	509	5106	3	Light Fraction	1		69	Salsoleae		פרקי גבעול		סלקיים	Chenopodiaceae	1	1
NZN-151	Nitzana	Tepper and Bar-Oz	Daniel Fuks	2017-2317	E	509	5106	3	Light Fraction	1		70	גזר/גזיר	Daucus/Torilis	זרע	seed	סוככיים	Apiaceae	1	1
NZN-151	Nitzana	Tepper and Bar-Oz	Daniel Fuks	2017-2318	E	509	5106	3	Light Fraction	1		71	געדה מצויה	Teucrium capitatum	זרע	seed	שפתניים	Labiateae	1	1
NZN-151	Nitzana	Tepper and Bar-Oz	Daniel Fuks	2017-2319	E	509	5106	3	Light Fraction	1		72	בלתי						1	1	לחבר בעתיד
NZN-151	Nitzana	Tepper and Bar-Oz	Daniel Fuks	2017-2320	E	509	5106	3	Light Fraction	1		73	בלתי		עלה קשקשני	leaf scale			2	2
NZN-151	Nitzana	Tepper and Bar-Oz	Daniel Fuks	2017-2321	E	509	5106	3	Light Fraction	1		74	בלתי-שונות
NZN-151	Nitzana	Tepper and Bar-Oz	Daniel Fuks	2017-2322	E	509	5106	3	Light Fraction	1		75	גלל? ציפה?
NZN-151	Nitzana	Tepper and Bar-Oz	Daniel Fuks	2017-2323	E	509	5106	3	Light Fraction	1		76	גללים
NZN-151	Nitzana	Tepper and Bar-Oz	Daniel Fuks	2017-2324	E	509	5106	3	Light Fraction	1		77	חוליית דג בגלל
NZN-151	Nitzana	Tepper and Bar-Oz	Daniel Fuks	2017-2325	E	509	5106	3	Light Fraction	1		78	גלל מכרסם?
NZN-151	Nitzana	Tepper and Bar-Oz	Daniel Fuks	2017-2326	E	509	5106	3	Light Fraction	1		79	חרק
NZN-151	Nitzana	Tepper and Bar-Oz	Daniel Fuks	2017-2327	E	509	5106	3	Light Fraction	0.5		80	שעורה דו-טורית/התבור?	cf. Hordeum vulgare subsp. distichum/spontaneum	פרק ציר שיבולת	rachis fragments	דגניים	Gramineae	1	1
NZN-151	Nitzana	Tepper and Bar-Oz	Daniel Fuks	2017-2328	E	509	5106	3	Light Fraction	0.5		81	חיטת הלחם?	cf. Triticum aestivum s.l.	פרק עליון?	top rachis segment?	דגניים	Gramineae	1	1
NZN-151	Nitzana	Tepper and Bar-Oz	Daniel Fuks	2017-2329	E	509	5106	3	Light Fraction	0.5		82	דגני	Hordeum/Triticum	פרק ציר שיבולת	rachis fragments	דגניים	Gramineae	13	13
NZN-151	Nitzana	Tepper and Bar-Oz	Daniel Fuks	2017-2330	E	509	5106	3	Light Fraction	0.5		83	חפורית	Phalaris minor/paradoxa	גרגיר	grain	דגניים	Gramineae	3	3
NZN-151	Nitzana	Tepper and Bar-Oz	Daniel Fuks	2017-2331	E	509	5106	3	Light Fraction	0.5		84	דגני עמ' 154		גרגיר	grain	דגניים	Gramineae	1	1
NZN-151	Nitzana	Tepper and Bar-Oz	Daniel Fuks	2017-2332	E	509	5106	3	Light Fraction	0.5		85	שעורה מכחילה?	Hordeum glaucum??	גרגיר	grain	דגניים	Gramineae	2	2
NZN-151	Nitzana	Tepper and Bar-Oz	Daniel Fuks	2017-2333	E	509	5106	3	Light Fraction	0.5		86	חיטה?	cf. Triticum	גרגיר	grain	דגניים	Gramineae	1	1
NZN-151	Nitzana	Tepper and Bar-Oz	Daniel Fuks	2017-2334	E	509	5106	3	Light Fraction	0.5		87	דגני		גרגיר	grain	דגניים	Gramineae	1	1
NZN-151	Nitzana	Tepper and Bar-Oz	Daniel Fuks	2017-2335	E	509	5106	3	Light Fraction	0.5		88	דגני		פרק דגן	culm nodes	דגניים	Gramineae	2	2
NZN-151	Nitzana	Tepper and Bar-Oz	Daniel Fuks	2017-2336	E	509	5106	3	Light Fraction	0.5		89	יבלית מצויה	Cynodon dactylon	גרגיר/פרח	grain/floret	דגניים	Gramineae	37	37	כולל פרח לא-פורה אחד
NZN-151	Nitzana	Tepper and Bar-Oz	Daniel Fuks	2017-2337	E	509	5106	3	Light Fraction	0.5		90	שעורה?	cf. Hordeum vulgare	פרק ציר שיבולת	rachis fragments	דגניים	Gramineae	1	1
NZN-151	Nitzana	Tepper and Bar-Oz	Daniel Fuks	2017-2338	E	509	5106	3	Light Fraction	0.5		91	דגני		פרק ציר שיבולת	rachis fragments	דגניים	Gramineae	2	2
NZN-151	Nitzana	Tepper and Bar-Oz	Daniel Fuks	2017-2339	E	509	5106	3	Light Fraction	0.5		92	דגני		שברי מלען	awn fragments	דגניים	Gramineae
NZN-151	Nitzana	Tepper and Bar-Oz	Daniel Fuks	2017-2340	E	509	5106	3	Light Fraction	0.5		93	פרפרני קטן		זרע	seed	פרפרניים	Fabaceae	2	2
NZN-151	Nitzana	Tepper and Bar-Oz	Daniel Fuks	2017-2341	E	509	5106	3	Light Fraction	0.5?		94	מתנן שעיר	Thymelaea hirsuta	עלה	leaf	מתנניים	Thymelaceae	40	40	הרבה שבורים, סטייה מקסימלית +-5
NZN-151	Nitzana	Tepper and Bar-Oz	Daniel Fuks	2017-2342	E	509	5106	3	Light Fraction	0.5?		95	מתנן שעיר	Thymelaea hirsuta	אגוזית	nutlet	מתנניים	Thymelaceae	1	1
NZN-151	Nitzana	Tepper and Bar-Oz	Daniel Fuks	2017-2343	E	509	5106	3	Light Fraction	0.5		96	מתנן שעיר	Thymelaea hirsuta	פרח סגור	flower bud	מתנניים	Thymelaceae	1	1	יש בנוסף אחד צעיר אם נצטרך אותו בהמשך
NZN-151	Nitzana	Tepper and Bar-Oz	Daniel Fuks	2017-2344	E	509	5106	3	Light Fraction	0.5		97	אהל מצוי	Mesembryanthemum nodiflorum	יחידת הפצה	dispersal unit	חיעדיים	Aizoaceae	1	1
NZN-151	Nitzana	Tepper and Bar-Oz	Daniel Fuks	2017-2345	E	509	5106	3	Light Fraction	0.5		98	חיעד ספרדי	Aizoon hispanicum	זרע	seed	חיעדיים	Aizoaceae	1	1
NZN-151	Nitzana	Tepper and Bar-Oz	Daniel Fuks	2017-2346	E	509	5106	3	Light Fraction	0.5		99	חלמית חדת-אונות/קטנת פרחים	Malva parviflora/oxyloba	זרע	seed	חלמיתיים	Malvaceae	3	3
NZN-151	Nitzana	Tepper and Bar-Oz	Daniel Fuks	2017-2347	E	509	5106	3	Light Fraction	0.5		100	בן-שלח מנוצה	Erucaria microcarpa	מקור תרמיל	siliqua joint	מצליבים	Brassicaceae	2	2
NZN-151	Nitzana	Tepper and Bar-Oz	Daniel Fuks	2017-2348	E	509	5106	3	Light Fraction	0.5		101	כף-אווז האשפות	Chenopodium murale	זרע	seed	סלקיים	Chenopodiaceae	3	3
NZN-151	Nitzana	Tepper and Bar-Oz	Daniel Fuks	2017-2349	E	509	5106	3	Light Fraction	0.5		102	לחך cf. סגלגל	Plantago cf. ovata	זרע	seed	לחכיים	Plantaginaceae	1	1
NZN-151	Nitzana	Tepper and Bar-Oz	Daniel Fuks	2017-2350	E	509	5106	3	Light Fraction	0.5		103	כף-אווז	Chenopodium sp.	זרע	seed	סלקיים	Chenopodiaceae	1	1	בעיית השתמרות
NZN-151	Nitzana	Tepper and Bar-Oz	Daniel Fuks	2017-2351	E	509	5106	3	Light Fraction	0.5		104	אמיתה גדולה/קיצית	Ammi majus/visnaga	זרעון	achene	סוככיים	Apiaceae	1	1	היתה צלקת יפה שהולכת אחורה. עכשיו אני לא רואה אותה. עמ' 118 מח' 2
NZN-151	Nitzana	Tepper and Bar-Oz	Daniel Fuks	2017-2352	E	509	5106	3	Light Fraction	0.5		105	מרגנית השדה/קטנה	Anagallis arvensis/foemina	זרע	seed	רקפתיים	Primulaceae	2	2
NZN-151	Nitzana	Tepper and Bar-Oz	Daniel Fuks	2017-2353	E	509	5106	3	Light Fraction	0.5		106	קחוון מצוי	Anthemis pseudocotula					2	2
NZN-151	Nitzana	Tepper and Bar-Oz	Daniel Fuks	2017-2354	E	509	5106	3	Light Fraction	0.5		107	להגדיר בהמשך		זרע וענף	seed and branch	מצליבים?	Brassicaceae?	2	2
NZN-151	Nitzana	Tepper and Bar-Oz	Daniel Fuks	2017-2355	E	509	5106	3	Light Fraction	0.5		108	להגדיר בהמשך		גבעול	branch	סלקיים?	Chenopodiaceae?	1	1
NZN-151	Nitzana	Tepper and Bar-Oz	Daniel Fuks	2017-2356	E	509	5106	3	Light Fraction	0.5		109	להגדיר בהמשך		פרח?	flower?	סלקיים?	Chenopodiaceae?	1	1	פיגמית נבדקה ולא מתאימה
NZN-151	Nitzana	Tepper and Bar-Oz	Daniel Fuks	2017-2357	E	509	5106	3	Light Fraction	0.5		110	להגדיר בהמשך						2	2	לפי הדגם
NZN-151	Nitzana	Tepper and Bar-Oz	Daniel Fuks	2017-2358	E	509	5106	3	Light Fraction	0.5		111	לחבר בהמשך						1	1	מתחיל ב-4 צינורות
NZN-151	Nitzana	Tepper and Bar-Oz	Daniel Fuks	2017-2359	E	509	5106	3	Light Fraction	0.5		112	בצלצול						1	1	לא להתעסק
NZN-151	Nitzana	Tepper and Bar-Oz	Daniel Fuks	2017-2360	E	509	5106	3	Light Fraction	0.5		113	לחבר בהמשך						1	1	מזכיר בטנונית. משהו לא מפותח?
NZN-151	Nitzana	Tepper and Bar-Oz	Daniel Fuks	2017-2361	E	509	5106	3	Light Fraction	0.5		114	בלתי - יואל ראה	UNIDENTIFIED
NZN-151	Nitzana	Tepper and Bar-Oz	Daniel Fuks	2017-2362	E	509	5106	3	Light Fraction	0.5		115	בלתי-שונות	UNIDENTIFIED
NZN-151	Nitzana	Tepper and Bar-Oz	Daniel Fuks	2017-2363	E	509	5106	3	Light Fraction	0.5		116	חרק
NZN-151	Nitzana	Tepper and Bar-Oz	Daniel Fuks	2017-2364	E	509	5106	3	Light Fraction	0.5		117	חוליית דג						5	5
NZN-151	Nitzana	Tepper and Bar-Oz	Daniel Fuks	2017-2365	E	509	5106	3	Light Fraction	0.5		118	סיבים
NZN-151	Nitzana	Tepper and Bar-Oz	Daniel Fuks	2017-2366	E	509	5106	3	Light Fraction	0.3		119	יבלית מצויה?	cf. Cynodon dactylon	גרגיר	grain	דגניים	Gramineae	2	2
NZN-151	Nitzana	Tepper and Bar-Oz	Daniel Fuks	2017-2367	E	509	5106	3	Light Fraction	0.3		120	דגני				דגניים	Gramineae	1	1	מח' ד עמ' 125
NZN-151	Nitzana	Tepper and Bar-Oz	Daniel Fuks	2017-2368	E	509	5106	3	Light Fraction	0.3		121	דגני?				?דגניים	Gramineae?	1	1	מח' 2 עמ' 124
NZN-151	Nitzana	Tepper and Bar-Oz	Daniel Fuks	2017-2369	E	509	5106	3	Light Fraction	0.3		122	דגני		שבר פרק ציר-שיבות	rachis segment fragment	דגניים	Gramineae	2	2
NZN-151	Nitzana	Tepper and Bar-Oz	Daniel Fuks	2017-2370	E	509	5106	3	Light Fraction	0.3		123	אהל מצוי	Mesembryanthemum nodiflorum	זרע	seed	חיעדיים	Aizoaceae	8	8
NZN-151	Nitzana	Tepper and Bar-Oz	Daniel Fuks	2017-2371	E	509	5106	3	Light Fraction	0.3		124	רכפה מגובששת/דקת-שיבולת	Reseda muricata/stenostachya	זרע	seed	רכפתיים	Resedaceae	1	1	מח' 2 עמ' 126. לדעתי מגובששת אבל יואל זהיר
NZN-151	Nitzana	Tepper and Bar-Oz	Daniel Fuks	2017-2372	E	509	5106	3	Light Fraction	0.3		125	קרסולה/צורית?	cf. Crassula/Sedum	זרע	seed	טבוריתיים?	Crassulaceae?	1	1
NZN-151	Nitzana	Tepper and Bar-Oz	Daniel Fuks	2017-2373	E	509	5106	3	Light Fraction	0.3		126	בלתי?				טבוריתיים?	Crassulaceae?	2	2
NZN-151	Nitzana	Tepper and Bar-Oz	Daniel Fuks	2017-2374	E	509	5106	3	Light Fraction	0.3		127	בלתי-שונות
NZN-151	Nitzana	Tepper and Bar-Oz	Daniel Fuks	2017-2375	E	509	5106	3	Light Fraction	0.3		128	חרק
NZN-151	Nitzana	Tepper and Bar-Oz	Daniel Fuks	2017-2376	E	509	5106	3	Light Fraction	0.3		129	סיבים
NZN-151	Nitzana	Tepper and Bar-Oz	Daniel Fuks	2017-2377		509	5106	3	Light Fraction	0.3		130	חוליית דג
NZN-152	Nitzana	Tepper and Bar-Oz	Daniel Fuks	2017-2378	E	509	5106	3	Heavy Residue	2	1	1	שעורה	Hordeum	גרגיר	grain	דגניים	Gramineae	2	2
NZN-152	Nitzana	Tepper and Bar-Oz	Daniel Fuks	2017-2379	E	509	5106	3	Heavy Residue	2	1	2	חיטה	Triticum	גרגיר	grain	דגניים	Gramineae	3	3
NZN-152	Nitzana	Tepper and Bar-Oz	Daniel Fuks	2017-2380	E	509	5106	3	Heavy Residue	2	1	3	חיטה/שעורה	Hordeum/Triticum	גרגיר ושברי גרגיר	grain and fragment	דגניים	Gramineae	5	5
NZN-152	Nitzana	Tepper and Bar-Oz	Daniel Fuks	2017-2381	E	509	5106	3	Heavy Residue	2	3	4	גפן	Vitis vinifera	חרצן	pip	גפניים	Vitaceae	1	1
NZN-152	Nitzana	Tepper and Bar-Oz	Daniel Fuks	2017-2382	E	509	5106	3	Heavy Residue	2	1	5			פרקי גבעול	culm nodes	דגניים	Gramineae	1	1
NZN-152	Nitzana	Tepper and Bar-Oz	Daniel Fuks	2017-2383	E	509	5106	3	Heavy Residue	2	1	6	זית	Olea europaea	שבר גלעין	stone fragment	זיתיים	Oleaceae	1	1
NZN-152	Nitzana	Tepper and Bar-Oz	Daniel Fuks	2017-2384	E	509	5106	3	Heavy Residue	2	3	7	שקד מצוי	Prunus amygdalus	שבר קליפה	endocarp fragment	ורדיים	Rosaceae	1	1
NZN-152	Nitzana	Tepper and Bar-Oz	Daniel Fuks	2017-2385	E	509	5106	3	Heavy Residue	2	7	8	בלתי
NZN-152	Nitzana	Tepper and Bar-Oz	Daniel Fuks	2017-2386	E	509	5106	3	Heavy Residue	2	8	9	בד
NZN-152	Nitzana	Tepper and Bar-Oz	Daniel Fuks	2017-2387	E	509	5106	3	Heavy Residue	2	8	10	גללים								טיפוסים שונים
NZN-153	Nitzana	Tepper and Bar-Oz	Daniel Fuks	2017-2388	E	510	5113	3	Light Fraction	2	1	1	שעורה	Hordeum	גרגיר	grain	דגניים	Gramineae	4	4
NZN-153	Nitzana	Tepper and Bar-Oz	Daniel Fuks	2017-2389	E	510	5113	3	Light Fraction	2	1	2	חיטה	Triticum	גרגיר	grain	דגניים	Gramineae	2	2
NZN-153	Nitzana	Tepper and Bar-Oz	Daniel Fuks	2017-2390	E	510	5113	3	Light Fraction	2	1	3	חיטה/שעורה	Hordeum/Triticum	גרגיר ושברי גרגיר	grain and fragment	דגניים	Gramineae	4	4
NZN-153	Nitzana	Tepper and Bar-Oz	Daniel Fuks	2017-2391	E	510	5113	3	Light Fraction	2	3	4	גפן	Vitis vinifera	חרצן	pip	גפניים	Vitaceae	8	8
NZN-153	Nitzana	Tepper and Bar-Oz	Daniel Fuks	2017-2392	E	510	5113	3	Light Fraction	2	1	5			פרקי גבעול	culm nodes	דגניים	Gramineae	14	14	מתוכם 6 שורשים
NZN-153	Nitzana	Tepper and Bar-Oz	Daniel Fuks	2017-2393	E	510	5113	3	Light Fraction	2	1	6			שברי מלען	awn fragments	דגניים	Gramineae	עשרות	עשרות
NZN-153	Nitzana	Tepper and Bar-Oz	Daniel Fuks	2017-2394	E	510	5113	3	Light Fraction	2	3	7	זית	Olea europaea	שבר גלעין	stone fragment	זיתיים	Oleaceae	2	2	לפי MNI
NZN-153	Nitzana	Tepper and Bar-Oz	Daniel Fuks	2017-2395	E	510	5113	3	Light Fraction	2	2	8	עדשה	Lens culinaris	זרע	seed	פרפרניים	Fabaceae	1	1
NZN-153	Nitzana	Tepper and Bar-Oz	Daniel Fuks	2017-2396	E	510	5113	3	Light Fraction	2	2	9	זנב-עקרב שיכני	Scorpiurus muricatus	זרע	seed	פרפרניים	Fabaceae	1	1
NZN-153	Nitzana	Tepper and Bar-Oz	Daniel Fuks	2017-2397	E	510	5113	3	Light Fraction	2	1	10	עוקצר מצוי	Brachypodium distachyon	גרגיר	grain	דגניים	Gramineae	1	1
NZN-153	Nitzana	Tepper and Bar-Oz	Daniel Fuks	2017-2398	E	510	5113	3	Light Fraction	2	7	11	דגני		גרגיר	grain	דגניים	Gramineae	1	1	אולי עוקצר
NZN-153	Nitzana	Tepper and Bar-Oz	Daniel Fuks	2017-2399	E	510	5113	3	Light Fraction	2	3	12	תמר??		קליפות						להשוות לעיל
NZN-153	Nitzana	Tepper and Bar-Oz	Daniel Fuks	2017-2400	E	510	5113	3	Light Fraction	2	3	13	רימון	Punica granatum	זרע	seed	רימוניים	Lythraceae	1	1
NZN-153	Nitzana	Tepper and Bar-Oz	Daniel Fuks	2017-2401	E	510	5113	3	Light Fraction	2	7	14	ציפה
NZN-153	Nitzana	Tepper and Bar-Oz	Daniel Fuks	2017-2402	E	510	5113	3	Light Fraction	2	8	15	גללים								שני שליש מבחנה
NZN-153	Nitzana	Tepper and Bar-Oz	Daniel Fuks	2017-2403	E	510	5113	3	Light Fraction	1	7.4	16	זית	Olea europaea	זרע	seed	זיתיים	Oleaceae	2	2
NZN-153	Nitzana	Tepper and Bar-Oz	Daniel Fuks	2017-2404	E	510	5113	3	Light Fraction	1	8	17	גפן	Vitis vinifera	חרצן	pip	גפניים	Vitaceae	2	2	MNI לפי עוקץ חרצן
NZN-153	Nitzana	Tepper and Bar-Oz	Daniel Fuks	2017-2405	E	510	5113	3	Light Fraction	1	8.6	18	גפן	Vitis vinifera	עוקץ	pedicel	גפניים	Vitaceae	5	5
NZN-153	Nitzana	Tepper and Bar-Oz	Daniel Fuks	2017-2406	E	510	5113	3	Light Fraction	1	9.2	19	שעורה שש-טורית	Hordeum vulgare subsp. hexastichum	פרק ציר שיבולת	rachis fragments	דגניים	Gramineae	6	6
NZN-153	Nitzana	Tepper and Bar-Oz	Daniel Fuks	2017-2407	E	510	5113	3	Light Fraction	1	9.8	20	שעורה דו-טורית/התבור	Hordeum vulgare subsp. distichum/spontaneum	פרק ציר שיבולת	rachis fragments	דגניים	Gramineae	2	2
NZN-153	Nitzana	Tepper and Bar-Oz	Daniel Fuks	2017-2408	E	510	5113	3	Light Fraction	1	10.4	21	שעורה	Hordeum vulgare	פרק ציר שיבולת	rachis fragments	דגניים	Gramineae	12	12	כולל 2 עם 2פרקים
NZN-153	Nitzana	Tepper and Bar-Oz	Daniel Fuks	2017-2409	E	510	5113	3	Light Fraction	1	11	22	חיטה טטרפלוידית	Triticum turgidum s.l.	פרק ציר שיבולת	rachis fragments	דגניים	Gramineae	34	34
NZN-153	Nitzana	Tepper and Bar-Oz	Daniel Fuks	2017-2410	E	510	5113	3	Light Fraction	1	11.6	23	חיטה	Triticum sp.	בסיס ציר שיבולת	first rachis segment	דגניים	Gramineae	2	2
NZN-153	Nitzana	Tepper and Bar-Oz	Daniel Fuks	2017-2411	E	510	5113	3	Light Fraction	1	12.2	24	חיטה/שעורה	Hordeum/Triticum	פרק ציר שיבולת	rachis fragments	דגניים	Gramineae	10	10
NZN-153	Nitzana	Tepper and Bar-Oz	Daniel Fuks	2017-2412	E	510	5113	3	Light Fraction	1	12.8	25	דגני		פרק ציר שיבולת	rachis fragments	דגניים	Gramineae	1	1	זון או פרק ראשון?
NZN-153	Nitzana	Tepper and Bar-Oz	Daniel Fuks	2017-2413	E	510	5113	3	Light Fraction	1	13.4	26	cf. חיטה	cf. Triticum	גרגיר	grain	דגניים	Gramineae	1	1	tail grain
NZN-153	Nitzana	Tepper and Bar-Oz	Daniel Fuks	2017-2414	E	510	5113	3	Light Fraction	1	14	27	עוקצר מצוי	Brachypodium distachyon	גרגיר	grain	דגניים	Gramineae	2	2
NZN-153	Nitzana	Tepper and Bar-Oz	Daniel Fuks	2017-2415	E	510	5113	3	Light Fraction	1	14.6	28	cf. עוקצר מצוי	cf. Brachypodium distachyon	גרגיר	grain	דגניים	Gramineae	9	9	MNI by embryos
NZN-153	Nitzana	Tepper and Bar-Oz	Daniel Fuks	2017-2416	E	510	5113	3	Light Fraction	1	15.2	29	זון אשון	Lolium rigidum	גרגיר	grain	דגניים	Gramineae	2	2	מח' 2 עמ' 146
NZN-153	Nitzana	Tepper and Bar-Oz	Daniel Fuks	2017-2417	E	510	5113	3	Light Fraction	1	15.8	30	שעורה	Hordeum sp.	גרגיר	grain	דגניים	Gramineae	2	2
NZN-153	Nitzana	Tepper and Bar-Oz	Daniel Fuks	2017-2418	E	510	5113	3	Light Fraction	1	16.4	31	שעורה	Hordeum sp.	גרגיר	grain	דגניים	Gramineae	2	2
NZN-153	Nitzana	Tepper and Bar-Oz	Daniel Fuks	2017-2419	E	510	5113	3	Light Fraction	1	17	32	טיפוס זון	Lolium type	גרגיר	grain	דגניים	Gramineae	1	1
NZN-153	Nitzana	Tepper and Bar-Oz	Daniel Fuks	2017-2420	E	510	5113	3	Light Fraction	1	17.6	33	דגני		גרגיר	grain	דגניים	Gramineae	1	1	יואל ראה - לא להתעסק
NZN-153	Nitzana	Tepper and Bar-Oz	Daniel Fuks	2017-2421	E	510	5113	3	Light Fraction	1	18.2	34	דגני		גרגיר	grain	דגניים	Gramineae	3	3
NZN-153	Nitzana	Tepper and Bar-Oz	Daniel Fuks	2017-2422	E	510	5113	3	Light Fraction	1	18.8	35	דגני		שרשי דגן	roots	דגניים	Gramineae	3	3	שונות
NZN-153	Nitzana	Tepper and Bar-Oz	Daniel Fuks	2017-2423	E	510	5113	3	Light Fraction	1	19.4	36	דגני		פרקי גבעול	culm nodes	דגניים	Gramineae	7	7
NZN-153	Nitzana	Tepper and Bar-Oz	Daniel Fuks	2017-2424	E	510	5113	3	Light Fraction	1	20	37	דגני		שברי מלען	awn fragments	דגניים	Gramineae
NZN-153	Nitzana	Tepper and Bar-Oz	Daniel Fuks	2017-2425	E	510	5113	3	Light Fraction	1	20.6	38	פיקוס התאנה	Ficus carica	אגוזית	nutlet	תותיים	Moraceae	3	3	אגוזית בציפה
NZN-153	Nitzana	Tepper and Bar-Oz	Daniel Fuks	2017-2426	E	510	5113	3	Light Fraction	1	21.2	39	שיכרון מרושת	Hyoscyamus reticulatus	זרע	seed	סולניים	Solanaceae	1	1
NZN-153	Nitzana	Tepper and Bar-Oz	Daniel Fuks	2017-2427	E	510	5113	3	Light Fraction	1	21.8	40	מתנן שעיר	Thymelaea hirsuta	עלה	leaf	מתנניים	Thymelaceae	2	2
NZN-153	Nitzana	Tepper and Bar-Oz	Daniel Fuks	2017-2428	E	510	5113	3	Light Fraction	1	22.4	41	מתנן שעיר	Thymelaea hirsuta	אגוזית	nutlet	מתנניים	Thymelaceae	1	1
NZN-153	Nitzana	Tepper and Bar-Oz	Daniel Fuks	2017-2429	E	510	5113	3	Light Fraction	1	23	42	לחך	Plantago	זרע	seed	לחכיים	Plantaginaceae	1	1
NZN-153	Nitzana	Tepper and Bar-Oz	Daniel Fuks	2017-2430	E	510	5113	3	Light Fraction	1	23.6	43	גרגרנית ערבית	Trigonella arabica	זרע	seed	פרפרניים	Fabaceae	3	3
NZN-153	Nitzana	Tepper and Bar-Oz	Daniel Fuks	2017-2431	E	510	5113	3	Light Fraction	1	24.2	44	זנב-עקרב שיכני	Scorpiurus muricatus	זרע	seed	פרפרניים	Fabaceae	1	1
NZN-153	Nitzana	Tepper and Bar-Oz	Daniel Fuks	2017-2432	E	510	5113	3	Light Fraction	1	24.8	45	cf. רימון	cf. Punica granatum	פנים של זרע	embryo			1	1
NZN-153	Nitzana	Tepper and Bar-Oz	Daniel Fuks	2017-2433	E	510	5113	3	Light Fraction	1	25.4	46	סולנום שעיר/שחור	Solanum villosum/nigrum			סולניים	Solanaceae	4	4
NZN-153	Nitzana	Tepper and Bar-Oz	Daniel Fuks	2017-2434	E	510	5113	3	Light Fraction	1	26	47	גבסנית שעירה	Gypsophila pilosa	זרע	seed	ציפרניים	Caryophyllaceae	1	1	זהה ל-81-46
NZN-153	Nitzana	Tepper and Bar-Oz	Daniel Fuks	2017-2435	E	510	5113	3	Light Fraction	1	26.6	48	cf. לוטוס	cf. Lotus	זרע	seed			1	1
NZN-153	Nitzana	Tepper and Bar-Oz	Daniel Fuks	2017-2436	E	510	5113	3	Light Fraction	1	27.2	49	תמר??
NZN-153	Nitzana	Tepper and Bar-Oz	Daniel Fuks	2017-2437	E	510	5113	3	Light Fraction	1	27.8	50	בלתי-שונות
NZN-153	Nitzana	Tepper and Bar-Oz	Daniel Fuks	2017-2438	E	510	5113	3	Light Fraction	1	28.4	51	גלל
NZN-153	Nitzana	Tepper and Bar-Oz	Daniel Fuks	2017-2439	E	510	5113	3	Light Fraction	1	29	52	חרק
NZN-153	Nitzana	Tepper and Bar-Oz	Daniel Fuks	2017-2440	E	510	5113	3	Light Fraction	1	29.6	53	עצם
NZN-154	Nitzana	Tepper and Bar-Oz	Daniel Fuks	2017-2441	E	510	5113	3	Heavy Residue	2	1	1	חיטה/שעורה	Hordeum/Triticum	שברי גרגיר	grain fragment	דגניים	Gramineae	1	1	אין גדול מחצי
NZN-154	Nitzana	Tepper and Bar-Oz	Daniel Fuks	2017-2442	E	510	5113	3	Heavy Residue	2	3	2	גפן	Vitis vinifera	חרצן	pip	גפניים	Vitaceae	3	3	אולי MNI=4
NZN-154	Nitzana	Tepper and Bar-Oz	Daniel Fuks	2017-2443	E	510	5113	3	Heavy Residue	2	3	3	זית	Olea europaea	שבר גלעין	stone fragment	זיתיים	Oleaceae	1	1
NZN-154	Nitzana	Tepper and Bar-Oz	Daniel Fuks	2017-2444	E	510	5113	3	Heavy Residue	2	3	4	תמר	Phoenix dactylifera	שבר גלעין	stone fragment	דקליים	Palmae	1	1
NZN-154	Nitzana	Tepper and Bar-Oz	Daniel Fuks	2017-2445	E	510	5113	3	Heavy Residue	2	7	5	בלתי-שונות
NZN-154	Nitzana	Tepper and Bar-Oz	Daniel Fuks	2017-2446	E	510	5113	3	Heavy Residue	2	8	6	גללים
NZN-155	Nitzana	Tepper and Bar-Oz	Daniel Fuks	2017-2447	E	511	5127	3	Light Fraction	2	1	1	שעורה	Hordeum	שברי גרגיר	grain fragment	דגניים	Gramineae	1	1	אין גדול מחצי
NZN-155	Nitzana	Tepper and Bar-Oz	Daniel Fuks	2017-2448	E	511	5127	3	Light Fraction	2	1	2	חיטה	Triticum	שברי גרגיר	grain fragment	דגניים	Gramineae	1	1	אין גדול מחצי
NZN-155	Nitzana	Tepper and Bar-Oz	Daniel Fuks	2017-2449	E	511	5127	3	Light Fraction	2	3	3	גפן	Vitis vinifera	חרצן	pip	גפניים	Vitaceae	2	2
NZN-155	Nitzana	Tepper and Bar-Oz	Daniel Fuks	2017-2450	E	511	5127	3	Light Fraction	2	7	4	בלתי-שונות								לחזור לזה
NZN-155	Nitzana	Tepper and Bar-Oz	Daniel Fuks	2017-2451	E	511	5127	3	Light Fraction	2	8	5	גללים								לא מפוחם
NZN-156	Nitzana	Tepper and Bar-Oz	Daniel Fuks	2017-2452	E	511	5127	3	Heavy Residue	2	7	1	בלתי
NZN-156	Nitzana	Tepper and Bar-Oz	Daniel Fuks	2017-2453	E	511	5127	3	Heavy Residue	2	8	2	גללים								לא מפוחם ולא צאן
NZN-157	Nitzana	Tepper and Bar-Oz	Daniel Fuks	2017-2454	E	512	5136	3	Light Fraction	2	1	1	שעורה	Hordeum	גרגיר	grain	דגניים	Gramineae	8	8
NZN-157	Nitzana	Tepper and Bar-Oz	Daniel Fuks	2017-2455	E	512	5136	3	Light Fraction	2	1	2	חיטה	Triticum	גרגיר	grain	דגניים	Gramineae	3	3
NZN-157	Nitzana	Tepper and Bar-Oz	Daniel Fuks	2017-2456	E	512	5136	3	Light Fraction	2	1	3	cf. חיטה	cf. Triticum	גרגיר	grain	דגניים	Gramineae	2	2	טיפוס אחר מהקודם
NZN-157	Nitzana	Tepper and Bar-Oz	Daniel Fuks	2017-2457	E	512	5136	3	Light Fraction	2	1	4	חיטה/שעורה	Hordeum/Triticum	גרגיר ושברי גרגיר	grain	דגניים	Gramineae	2	2	להראות ליעל
NZN-157	Nitzana	Tepper and Bar-Oz	Daniel Fuks	2017-2458	E	512	5136	3	Light Fraction	2	1	5	גפן	Vitis vinifera	שבר חרצן	pip fragment	גפניים	Vitaceae	1	1
NZN-157	Nitzana	Tepper and Bar-Oz	Daniel Fuks	2017-2459	E	512	5136	3	Light Fraction	2	3	6	חיטה טטרפלוידית	Triticum turgidum s.l.	פרק ציר שיבולת	rachis fragments	דגניים	Gramineae	1	1	כולל 2 פרקים
NZN-157	Nitzana	Tepper and Bar-Oz	Daniel Fuks	2017-2460	E	512	5136	3	Light Fraction	2	2	7	גפן	Vitis vinifera	עוקץ	pedicel	גפניים	Vitaceae	2	2
NZN-157	Nitzana	Tepper and Bar-Oz	Daniel Fuks	2017-2461	E	512	5136	3	Light Fraction	2	2	8			שרשי דגן	roots	דגניים	Gramineae
NZN-157	Nitzana	Tepper and Bar-Oz	Daniel Fuks	2017-2462	E	512	5136	3	Light Fraction	2	2	9			פרקי גבעול	culm nodes	דגניים	Gramineae	9	9
NZN-157	Nitzana	Tepper and Bar-Oz	Daniel Fuks	2017-2463	E	512	5136	3	Light Fraction	2	2	10	בקיים	Vicieae	זרע	seed	פרפרניים	Fabaceae	5	5
NZN-157	Nitzana	Tepper and Bar-Oz	Daniel Fuks	2017-2464	E	512	5136	3	Light Fraction	2	3	11	תמר	Phoenix dactylifera	שבר גלעין	stone fragment	דקליים	Palmae	1	1
NZN-157	Nitzana	Tepper and Bar-Oz	Daniel Fuks	2017-2465	E	512	5136	3	Light Fraction	2	3	12	ציפה?
NZN-157	Nitzana	Tepper and Bar-Oz	Daniel Fuks	2017-2466	E	512	5136	3	Light Fraction	2	7	13	בלתי-שונות
NZN-157	Nitzana	Tepper and Bar-Oz	Daniel Fuks	2017-2467	E	512	5136	3	Light Fraction	2	8	14	גללים
NZN-157	Nitzana	Tepper and Bar-Oz	Daniel Fuks	2017-2468	E	512	5136	3	Light Fraction	1	9.4	15	שעורה שש-טורית	Hordeum vulgare subsp. hexastichum	פרק ציר שיבולת	rachis fragments	דגניים	Gramineae	30	30
NZN-157	Nitzana	Tepper and Bar-Oz	Daniel Fuks	2017-2469	E	512	5136	3	Light Fraction	1	11	16	שעורה שש-טורית	Hordeum vulgare subsp. hexastichum	פרק ראשון	first rachis segment	דגניים	Gramineae	1	1	כולל 2 עם 3 פרקים
NZN-157	Nitzana	Tepper and Bar-Oz	Daniel Fuks	2017-2470	E	512	5136	3	Light Fraction	1	12.6	17	שעורה דו-טורית/התבור	Hordeum vulgare subsp. distichum/spontaneum	פרק ציר שיבולת	rachis fragments	דגניים	Gramineae	11	11
NZN-157	Nitzana	Tepper and Bar-Oz	Daniel Fuks	2017-2471	E	512	5136	3	Light Fraction	1	14.2	18	שעורה	Hordeum vulgare	פרק ציר שיבולת	rachis fragments	דגניים	Gramineae	5	5
NZN-157	Nitzana	Tepper and Bar-Oz	Daniel Fuks	2017-2472	E	512	5136	3	Light Fraction	1	15.8	19	חיטה טטרפלוידית	Triticum turgidum s.l.	פרק ציר שיבולת	rachis fragments	דגניים	Gramineae	4	4
NZN-157	Nitzana	Tepper and Bar-Oz	Daniel Fuks	2017-2473	E	512	5136	3	Light Fraction	1	17.4	20	חיטה	Triticum sp.	פרק ציר שיבולת	rachis fragments	דגניים	Gramineae	5	5
NZN-157	Nitzana	Tepper and Bar-Oz	Daniel Fuks	2017-2474	E	512	5136	3	Light Fraction	1	19	21	חיטה	Triticum sp.	פרק ראשון	first rachis segment	דגניים	Gramineae	1	1
NZN-157	Nitzana	Tepper and Bar-Oz	Daniel Fuks	2017-2475	E	512	5136	3	Light Fraction	1	20.6	22	דגני	Poaceae	פרק ציר שיבולת	rachis fragments	דגניים	Gramineae	10	10
NZN-157	Nitzana	Tepper and Bar-Oz	Daniel Fuks	2017-2476	E	512	5136	3	Light Fraction	1	22.2	23			פרקי גבעול	culm nodes	דגניים	Gramineae	20	20
NZN-157	Nitzana	Tepper and Bar-Oz	Daniel Fuks	2017-2477	E	512	5136	3	Light Fraction	1	23.8	24	חיטה	Triticum sp.	גרגיר	grain	דגניים	Gramineae	2	2
NZN-157	Nitzana	Tepper and Bar-Oz	Daniel Fuks	2017-2478	E	512	5136	3	Light Fraction	1	25.4	25	חיטה/זון משכר	Triticum/Lolium temulentum	גרגיר	grain	דגניים	Gramineae	2	2
NZN-157	Nitzana	Tepper and Bar-Oz	Daniel Fuks	2017-2479	E	512	5136	3	Light Fraction	1	27	26	זון אשון/רב-פרחים	Lolium rigidum/multiflorum	גרגיר	grain	דגניים	Gramineae	1	1
NZN-157	Nitzana	Tepper and Bar-Oz	Daniel Fuks	2017-2480	E	512	5136	3	Light Fraction	1	28.6	27	עוקצר מצוי	Brachypodium distachyon	גרגיר	grain	דגניים	Gramineae	1	1
NZN-157	Nitzana	Tepper and Bar-Oz	Daniel Fuks	2017-2481	E	512	5136	3	Light Fraction	1	30.2	28	זון/בן-אפר	Lolium/Festuca	גרגיר	grain	דגניים	Gramineae	1	1	עמ' 153 מח' 2
NZN-157	Nitzana	Tepper and Bar-Oz	Daniel Fuks	2017-2482	E	512	5136	3	Light Fraction	1	31.8	29	טיפוס עוקצר	Brachypodium type	גרגיר	grain	דגניים	Gramineae	1	1
NZN-157	Nitzana	Tepper and Bar-Oz	Daniel Fuks	2017-2483	E	512	5136	3	Light Fraction	1	33.4	30	דגני	Poaceae	גרגיר	grain	דגניים	Gramineae	6	6	טיפוסים שונים
NZN-157	Nitzana	Tepper and Bar-Oz	Daniel Fuks	2017-2484	E	512	5136	3	Light Fraction	1	35	31	בקיי	Vicieae	זרע	seed	פרפרניים	Fabaceae	1	1
NZN-157	Nitzana	Tepper and Bar-Oz	Daniel Fuks	2017-2485	E	512	5136	3	Light Fraction	1	36.6	32	cf. בקיי	cf. Vicieae	זרע	seed	פרפרניים	Fabaceae	2	2
NZN-157	Nitzana	Tepper and Bar-Oz	Daniel Fuks	2017-2486	E	512	5136	3	Light Fraction	1	38.2	33	גרגרנית ערבית	Trgonella arabica	זרע	seed	פרפרניים	Fabaceae	6	6
NZN-157	Nitzana	Tepper and Bar-Oz	Daniel Fuks	2017-2487	E	512	5136	3	Light Fraction	1	39.8	34	פרפרני קטן	small-seeded legume	זרע	seed	פרפרניים	Fabaceae	1	1	דמוי-לוטוס מגובשש
NZN-157	Nitzana	Tepper and Bar-Oz	Daniel Fuks	2017-2488	E	512	5136	3	Light Fraction	1	41.4	35	פרפרני קטן	small-seeded legume	זרע	seed	פרפרניים	Fabaceae	4	4	דמוי-תלתן
NZN-157	Nitzana	Tepper and Bar-Oz	Daniel Fuks	2017-2489	E	512	5136	3	Light Fraction	1	43	36	סבונית השדה	Vaccaria hispanica	זרע	seed	פרפרניים	Fabaceae	1	1
NZN-157	Nitzana	Tepper and Bar-Oz	Daniel Fuks	2017-2490	E	512	5136	3	Light Fraction	1	44.6	37	פיגמיים?		זרע	seed	פרפרניים	Fabaceae	1	1	לחזור לזה בסוף, יכול להיות מעניין
NZN-157	Nitzana	Tepper and Bar-Oz	Daniel Fuks	2017-2491	E	512	5136	3	Light Fraction	1	46.2	38	חלמית	Malva sp.	זרע	seed	חלמיתיים	Malvaceae
NZN-157	Nitzana	Tepper and Bar-Oz	Daniel Fuks	2017-2492	E	512	5136	3	Light Fraction	1	47.8	39	מתנן שעיר	Thymelaea hirsuta	עלה	leaf	מתנניים	Thymelaceae	4	4
NZN-157	Nitzana	Tepper and Bar-Oz	Daniel Fuks	2017-2493	E	512	5136	3	Light Fraction	1	49.4	40	מתנן שעיר	Thymelaea hirsuta	אגוזית	nutlet	מתנניים	Thymelaceae	1	1
NZN-157	Nitzana	Tepper and Bar-Oz	Daniel Fuks	2017-2494	E	512	5136	3	Light Fraction	1	51	41	אמיך קוצני	Emex spinosa	שבר קליפת פרי	capsule fragment	ארכוביתיים	Polygonaceae	1	1
NZN-157	Nitzana	Tepper and Bar-Oz	Daniel Fuks	2017-2495	E	512	5136	3	Light Fraction	1	52.6	42	ארנבית שרועה	Arnebia decumbens	זרע	seed	זיפניים	Boraginaceae	2	2
NZN-157	Nitzana	Tepper and Bar-Oz	Daniel Fuks	2017-2496	E	512	5136	3	Light Fraction	1	54.2	43	בר-עכנאי שיכני	Echiochilon fruticosum	זרע	seed	זיפניים	Boraginaceae	7	7
NZN-157	Nitzana	Tepper and Bar-Oz	Daniel Fuks	2017-2497	E	512	5136	3	Light Fraction	1	55.8	44	פרגה	Glaucium sp.	זרע	seed	פרגיים	Papaveraceae	1	1
NZN-157	Nitzana	Tepper and Bar-Oz	Daniel Fuks	2017-2498	E	512	5136	3	Light Fraction	1	57.4	45	מקור חסידה?		זרע	seed			2	2
NZN-157	Nitzana	Tepper and Bar-Oz	Daniel Fuks	2017-2499	E	512	5136	3	Light Fraction	1	59	46	גפן	Vitis vinifera	שבר חרצן	pip fragment	גפניים	Vitaceae	1	1
NZN-157	Nitzana	Tepper and Bar-Oz	Daniel Fuks	2017-2500	E	512	5136	3	Light Fraction	1	60.6	47			שרשי דגן	roots	דגניים	Gramineae	1	1
NZN-157	Nitzana	Tepper and Bar-Oz	Daniel Fuks	2017-2501	E	512	5136	3	Light Fraction	1	62.2	48	cf. רימון	cf. Punica granatum	שבר קליפת הזרע	seed coat fragment	רימוניים	Lythraceae	1	1
NZN-157	Nitzana	Tepper and Bar-Oz	Daniel Fuks	2017-2502	E	512	5136	3	Light Fraction	1	63.8	49	בלתי-שונות
NZN-157	Nitzana	Tepper and Bar-Oz	Daniel Fuks	2017-2503	E	512	5136	3	Light Fraction	1	65.4	50	גללים
NZN-157	Nitzana	Tepper and Bar-Oz	Daniel Fuks	2017-2504	E	512	5136	3	Light Fraction	1	67	51	חרק ועלים רצנטיים
NZN-157	Nitzana	Tepper and Bar-Oz	Daniel Fuks	2017-2505	E	512	5136	3	Light Fraction	0.5	68.6	52	cf. גפן	cf. Vitis vinifera	עוקץ חרצן	pip fragment	גפניים	Vitaceae	2	2
NZN-157	Nitzana	Tepper and Bar-Oz	Daniel Fuks	2017-2506	E	512	5136	3	Light Fraction	0.5	70.2	53	שעורה שש-טורית	Hordeum vulgare subsp. hexastichum	פרק ציר שיבולת	rachis fragments	דגניים	Gramineae	6	6	כולל 3 שהם חצאים
NZN-157	Nitzana	Tepper and Bar-Oz	Daniel Fuks	2017-2507	E	512	5136	3	Light Fraction	0.5	71.8	54	שעורה דו-טורית/התבור	Hordeum vulgare subsp. distichum/spontaneum	פרק ציר שיבולת	rachis fragments	דגניים	Gramineae	5	5
NZN-157	Nitzana	Tepper and Bar-Oz	Daniel Fuks	2017-2508	E	512	5136	3	Light Fraction	0.5	73.4	55	שעורה	Hordeum vulgare	פרק ציר שיבולת	rachis fragments	דגניים	Gramineae	13	13
NZN-157	Nitzana	Tepper and Bar-Oz	Daniel Fuks	2017-2509	E	512	5136	3	Light Fraction	0.5	75	56	חיטה טטרפלוידית	Triticum turgidum s.l.	פרק ציר שיבולת	rachis fragments	דגניים	Gramineae	2	2
NZN-157	Nitzana	Tepper and Bar-Oz	Daniel Fuks	2017-2510	E	512	5136	3	Light Fraction	0.5	76.6	57	חיטה	Triticum sp.	פרק ציר שיבולת	rachis fragments	דגניים	Gramineae	5	5
NZN-157	Nitzana	Tepper and Bar-Oz	Daniel Fuks	2017-2511	E	512	5136	3	Light Fraction	0.5	78.2	58	דגני	Poaceae	פרק ראשון/צווארון	first rachis segment/collar	דגניים	Gramineae	3	3
NZN-157	Nitzana	Tepper and Bar-Oz	Daniel Fuks	2017-2512	E	512	5136	3	Light Fraction	0.5	79.8	59	דגני	Poaceae	פרק ציר שיבולת	rachis fragments	דגניים	Gramineae	90	90
NZN-157	Nitzana	Tepper and Bar-Oz	Daniel Fuks	2017-2513	E	512	5136	3	Light Fraction	0.5	81.4	60	דגני	Poaceae	פרקי גבעול	culm nodes	דגניים	Gramineae	6	6
NZN-157	Nitzana	Tepper and Bar-Oz	Daniel Fuks	2017-2514	E	512	5136	3	Light Fraction	0.5	83	61	דגני	Poaceae	עובר	embryo			8	8
NZN-157	Nitzana	Tepper and Bar-Oz	Daniel Fuks	2017-2515	E	512	5136	3	Light Fraction	0.5	84.6	62	דגני	Poaceae	שברי מלען	awn fragments
NZN-157	Nitzana	Tepper and Bar-Oz	Daniel Fuks	2017-2516	E	512	5136	3	Light Fraction	0.5	86.2	63	יבלית מצויה	Cynodon dactylon	גרגיר	grain	דגניים	Gramineae	41	41
NZN-157	Nitzana	Tepper and Bar-Oz	Daniel Fuks	2017-2517	E	512	5136	3	Light Fraction	0.5	87.8	64	חפורית קטנה/מוזרה	Phalaris minor/paradoxa	גרגיר	grain	דגניים	Gramineae	4	4
NZN-157	Nitzana	Tepper and Bar-Oz	Daniel Fuks	2017-2518	E	512	5136	3	Light Fraction	0.5	89.4	65	חפורית מוזרה	Phalaris paradoxa	שבר מכבד	panicle fragment	דגניים	Gramineae	1	1
NZN-157	Nitzana	Tepper and Bar-Oz	Daniel Fuks	2017-2519	E	512	5136	3	Light Fraction	0.5	91	66	דגני	Poaceae	גרגיר	grain	דגניים	Gramineae	1	1	עובר קטן (1/6), עובי מקס בשליש עליון - עמ' 158
NZN-157	Nitzana	Tepper and Bar-Oz	Daniel Fuks	2017-2520	E	512	5136	3	Light Fraction	0.5	92.6	67	זון cf.	cf. Lolium	גרגיר	grain	דגניים	Gramineae	1	1	מח' 2 עמ' 158 לחבר לאחרים
NZN-157	Nitzana	Tepper and Bar-Oz	Daniel Fuks	2017-2521	E	512	5136	3	Light Fraction	0.5	94.2	68	טיפוס עוקצר	Brachypodium type	גרגיר	grain	דגניים	Gramineae	2	2
NZN-157	Nitzana	Tepper and Bar-Oz	Daniel Fuks	2017-2522	E	512	5136	3	Light Fraction	0.5	95.8	69	דגני	Poaceae	גרגיר	grain	דגניים	Gramineae	6	6
NZN-157	Nitzana	Tepper and Bar-Oz	Daniel Fuks	2017-2523	E	512	5136	3	Light Fraction	0.5	97.4	70	cf. גרגרנית ערבית	cf. Trigonella arabica	זרע	seed	פרפרניים	Fabaceae	2	2
NZN-157	Nitzana	Tepper and Bar-Oz	Daniel Fuks	2017-2524	E	512	5136	3	Light Fraction	0.5	99	71	cf. תלתן	cf. Trifolium	זרע	seed	פרפרניים	Fabaceae	13	13
NZN-157	Nitzana	Tepper and Bar-Oz	Daniel Fuks	2017-2525	E	512	5136	3	Light Fraction	0.5	100.6	72	תלתן	Trifolium sp.	זרע	seed	פרפרניים	Fabaceae	1	1	במגדיר הצהוב- לבדוק אלה שלפני 8 ואחרי 21
NZN-157	Nitzana	Tepper and Bar-Oz	Daniel Fuks	2017-2526	E	512	5136	3	Light Fraction	0.5	102.2	73	cf. לוטוס	cf. Lotus	זרע	seed	פרפרניים	Fabaceae	1	1
NZN-157	Nitzana	Tepper and Bar-Oz	Daniel Fuks	2017-2527	E	512	5136	3	Light Fraction	0.5	103.8	74	קדד שעיר cf.	cf. Astragalus hispidus	זרע	seed	פרפרניים	Fabaceae	1	1
NZN-157	Nitzana	Tepper and Bar-Oz	Daniel Fuks	2017-2528	E	512	5136	3	Light Fraction	0.5	105.4	75	קדד/גרגרנית	Astragalus/Trigonella	זרע	seed	פרפרניים	Fabaceae	1	1
NZN-157	Nitzana	Tepper and Bar-Oz	Daniel Fuks	2017-2529	E	512	5136	3	Light Fraction	0.5	107	76	פיקוס התאנה	Ficus carica	אגוזית	nutlet	תותיים		33	33
NZN-157	Nitzana	Tepper and Bar-Oz	Daniel Fuks	2017-2530	E	512	5136	3	Light Fraction	0.5	108.6	77	מתנן שעיר	Thymelaea hirsuta	עלה	leaf	מתנניים	Thymelaceae	30	30
NZN-157	Nitzana	Tepper and Bar-Oz	Daniel Fuks	2017-2531	E	512	5136	3	Light Fraction	0.5	110.2	78	אשל הפרקים	Tamarix aphylla	פרקים	scales	אשליים	Tamaricaceae	1	1
NZN-157	Nitzana	Tepper and Bar-Oz	Daniel Fuks	2017-2532	E	512	5136	3	Light Fraction	0.5	111.8	79	בן-שלח מנוצה	Erucaria microcarpa	מקור תרמיל		מצליבים	Brassicaceae	1	1
NZN-157	Nitzana	Tepper and Bar-Oz	Daniel Fuks	2017-2533	E	512	5136	3	Light Fraction	0.5	113.4	80	צנון?	Raphanus raphanistrum?	פרק תרמיל		מצליבים	Brassicaceae	1	1
NZN-157	Nitzana	Tepper and Bar-Oz	Daniel Fuks	2017-2534	E	512	5136	3	Light Fraction	0.5	115	81	מצליב		עוקץ תרמילון		מצליבים	Brassicaceae	1	1
NZN-157	Nitzana	Tepper and Bar-Oz	Daniel Fuks	2017-2535	E	512	5136	3	Light Fraction	0.5	116.6	82	בר-עכנאי שיכני	Echiochilon fruticosum	זרע	seed	זיפניים	Boraginaceae	4	4
NZN-157	Nitzana	Tepper and Bar-Oz	Daniel Fuks	2017-2536	E	512	5136	3	Light Fraction	0.5	118.2	83	שלוחית	Andrachne					4	4
NZN-157	Nitzana	Tepper and Bar-Oz	Daniel Fuks	2017-2537	E	512	5136	3	Light Fraction	0.5	119.8	84	אהל מצוי	Mesembryanthemum nodiflorum	זרע	seed	חיעדיים	Aizoaceae	1	1
NZN-157	Nitzana	Tepper and Bar-Oz	Daniel Fuks	2017-2538	E	512	5136	3	Light Fraction	0.5	121.4	85	חיעד ספרדי	Aizoon hispanicum	זרע	seed	חיעדיים	Aizoaceae	4	4
NZN-157	Nitzana	Tepper and Bar-Oz	Daniel Fuks	2017-2539	E	512	5136	3	Light Fraction	0.5	123	86	מרגנית השדה	Anagallis arvensis/foemina					1	1
NZN-157	Nitzana	Tepper and Bar-Oz	Daniel Fuks	2017-2540	E	512	5136	3	Light Fraction	0.5	124.6	87	לחך	Plantago					4	4
NZN-157	Nitzana	Tepper and Bar-Oz	Daniel Fuks	2017-2541	E	512	5136	3	Light Fraction	0.5	126.2	88	חלמית חדת-אונות/קטנת פרחים	Malva parviflora/oxyloba	זרע	seed	חלמיתיים	Malvaceae	2	2
NZN-157	Nitzana	Tepper and Bar-Oz	Daniel Fuks	2017-2542	E	512	5136	3	Light Fraction	0.5	127.8	89	cf. אזוביון מדברי	cf. Lavandula coronopifolia					1	1
NZN-157	Nitzana	Tepper and Bar-Oz	Daniel Fuks	2017-2543	E	512	5136	3	Light Fraction	0.5	129.4	90	בלתי להמשך		זרע	seed			1	1	לא לטמיים, לא חלבלוביים
NZN-157	Nitzana	Tepper and Bar-Oz	Daniel Fuks	2017-2544	E	512	5136	3	Light Fraction	0.5	131	91	cf. כף-אווז		זרע	seed			4	4
NZN-157	Nitzana	Tepper and Bar-Oz	Daniel Fuks	2017-2545	E	512	5136	3	Light Fraction	0.5	132.6	92	בלתי		יחידת הפצה	dispersal unit			2	2	אוכם/כף-אווז - אפשרי לפי דגם הזרע, צורת הפרח, אבל אינני מצליח להוכיח
NZN-157	Nitzana	Tepper and Bar-Oz	Daniel Fuks	2017-2546	E	512	5136	3	Light Fraction	0.5	134.2	93	רכפה מגובששת	Reseda muricata	זרע	seed	רכפתיים	Resedaceae
NZN-157	Nitzana	Tepper and Bar-Oz	Daniel Fuks	2017-2547	E	512	5136	3	Light Fraction	0.5	135.8	94	אוכם	Suaeda sp.	זרע	seed	סלקיים	Chenopodiaceae	1	1
NZN-157	Nitzana	Tepper and Bar-Oz	Daniel Fuks	2017-2548	E	512	5136	3	Light Fraction	0.5	137.4	95	רכפה/ששן		זרע	seed	רכפתיים	Resedaceae
NZN-157	Nitzana	Tepper and Bar-Oz	Daniel Fuks	2017-2549	E	512	5136	3	Light Fraction	0.5	139	96	רכפתני?
NZN-157	Nitzana	Tepper and Bar-Oz	Daniel Fuks	2017-2550	E	512	5136	3	Light Fraction	0.5	140.6	97	דמוי-סוככי להמשך
NZN-157	Nitzana	Tepper and Bar-Oz	Daniel Fuks	2017-2551	E	512	5136	3	Light Fraction	0.5	142.2	98	סוככי?
NZN-157	Nitzana	Tepper and Bar-Oz	Daniel Fuks	2017-2552	E	512	5136	3	Light Fraction	0.5	143.8	99	זרעון מורכבים
NZN-157	Nitzana	Tepper and Bar-Oz	Daniel Fuks	2017-2553	E	512	5136	3	Light Fraction	0.5	145.4	100	בלתי		פרח/יחידת הפצה	flower/dispersal unit			1	1	לא הזנב של האזנב
NZN-157	Nitzana	Tepper and Bar-Oz	Daniel Fuks	2017-2554	E	512	5136	3	Light Fraction	0.5	147	101	בלתי		תפרחת
NZN-157	Nitzana	Tepper and Bar-Oz	Daniel Fuks	2017-2555	E	512	5136	3	Light Fraction	0.5	148.6	102	בלתי-שונות
NZN-157	Nitzana	Tepper and Bar-Oz	Daniel Fuks	2017-2556	E	512	5136	3	Light Fraction	0.5	150.2	103	שברי גלל
NZN-157	Nitzana	Tepper and Bar-Oz	Daniel Fuks	2017-2557	E	512	5136	3	Light Fraction	0.5	151.8	104	רגלי חרק								מפוחם?
NZN-157	Nitzana	Tepper and Bar-Oz	Daniel Fuks	2017-2558	E	512	5136	3	Light Fraction	0.5	153.4	105	חרק רצנטי
NZN-157	Nitzana	Tepper and Bar-Oz	Daniel Fuks	2017-2559	E	512	5136	3	Light Fraction	0.5	155	106	חוליית דג								7
NZN-158	Nitzana	Tepper and Bar-Oz	Daniel Fuks	2017-2560	E	512	5136	3	Heavy Residue	2	1	1	חיטה/שעורה	Hordeum/Triticum	גרגיר ושברי גרגיר	grain and fragments	דגניים	Gramineae	2	2	נוטה לחיטה
NZN-158	Nitzana	Tepper and Bar-Oz	Daniel Fuks	2017-2561	E	512	5136	3	Heavy Residue	2	3	2	זית	Olea europaea	שבר גלעין	stone fragment	זיתיים	Oleaceae	1	1
NZN-158	Nitzana	Tepper and Bar-Oz	Daniel Fuks	2017-2562	E	512	5136	3	Heavy Residue	2	3	3	תמר מצוי	Phoenix dactylifera	שבר גלעין	stone fragment	דקליים	Palmae	1	1
NZN-158	Nitzana	Tepper and Bar-Oz	Daniel Fuks	2017-2563	E	512	5136	3	Heavy Residue	2		4	זית	Olea europaea	זרע	seed	זיתיים	Oleaceae	1	1	נדיר - זרע שמתוך הגלעין
NZN-158	Nitzana	Tepper and Bar-Oz	Daniel Fuks	2017-2564	E	512	5136	3	Heavy Residue	2		5	בלתי		קליפה של גפן?						קליפה של גפן?
NZN-158	Nitzana	Tepper and Bar-Oz	Daniel Fuks	2017-2565	E	512	5136	3	Heavy Residue	2	7	6	בלתי-שונות
NZN-158	Nitzana	Tepper and Bar-Oz	Daniel Fuks	2017-2566	E	512	5136	3	Heavy Residue	2	8		טיח?								הוצאתי רק חלק ממה שהיה
NZN-158	Nitzana	Tepper and Bar-Oz	Daniel Fuks	2017-2567	E	512	5136	3	Heavy Residue	2	8		גללים
																			2043

## Sheet: סינון גס ורטוב
Lab # New	Lab #	Site	Area	Locus	Basket	Vial no.	מין הצמח	Plant Latin name	איבר	Organ	Family	משפחה	Quantity	Notes	Notes
NZN-173	NZN-159	Nitzana	A	101	1008/1	1	תורמוס	Lupinus alba	זרע	seed			2
NZN-173	NZN-159	Nitzana	A	101	1008/1	2	אורן הצנובר	Pinus pinea	קליפת זרע	seed coat			1	להגדרה
NZN-174	NZN-160	Nitzana	A	101	1032/2	1	cf. טופח ספרדי	cf. Lathyrus clymenum	זרע	seed			1	קטן אך בתוך המגוון. צורה כנ"ל
NZN-174	NZN-160	Nitzana	A	101	1032/2	2	אפרסק	Prunus persica	קליפת זרע	seed coat			1
NZN-175	NZN-161	Nitzana	A	101	1033/3	1	דבקה?		זרע	seed			1
NZN-176	NZN-162	Nitzana	A	101	1049/3	1	צחנן מבאיש	Anagyris foetida	זרע	seed				BULK
NZN-177	NZN-163	Nitzana	A	101/7	1040/2	1	בלתי						2
NZN-177	NZN-163	Nitzana	A	101/7	1040/2	2	תורמוס	Lupinus alba	זרע	seed			1
NZN-178	NZN-164	Nitzana	A	101	1070/3	1	טופח	Lathyrus sect. cicercula	זרע	seed			2
NZN-178	NZN-164	Nitzana	A	101	1070/3	1	רימון	Punica granatum	זרע	seed
NZN-179	NZN-165	Nitzana	A	102	1074/1	1	שיטה רצנטית		זרע	seed			6
NZN-179	NZN-165	Nitzana	A	102	1074/1	2	רצנטי?		זרע	seed			2
NZN-180	NZN-166	Nitzana	A	102	1096/2	1	בלתי		קליפת זרע	seed coat			1	אולי צנובר
NZN-180	NZN-166	Nitzana	A	102	1096/2	2	קטנית להגדרה		זרע	seed			3	אחד להגדרה
NZN-180	NZN-166	Nitzana	A	102	1096/2	3	בקיה/טופח	Lathyrus/Vicia	זרע	seed			2
NZN-181	NZN-167	Nitzana	A	102	1103/2	1	פול הגינה	Vicia faba	פסיג	cotyledon			1	BULK
NZN-181	NZN-167	Nitzana	A	103	1103/2	2	אורן הצנובר	Pinus pinea	קליפת זרע	seed coat			2	BULK
NZN-181	NZN-167	Nitzana	A	104	1103/2	3	בלתי
NZN-182	NZN-168	Nitzana	A	103	1137/2	1	cf. חרוב	cf. Ceratonia siliqua	זרע	seed			3
NZN-182	NZN-168	Nitzana	A	103	1137/2	2	שיטה/ינבוט	Acacia/Prosopis	זרע	seed			1	רצנטי
NZN-183	NZN-169	Nitzana	A	103	1143	1	בלתי						1
NZN-183	NZN-169	Nitzana	A	103	1143/2	2	zilla?						1	BULK
NZN-184	NZN-170	Nitzana	A	103	1172/4	1	בלתי						1	רצנטי
NZN-185	NZN-171	Nitzana	A	104	1193/1	1	חרוז	bead					1
NZN-186	NZN-172	Nitzana	A	104	1205	1	פול הגינה	Vicia faba	פסיג	cotyledon
NZN-186	NZN-172	Nitzana	A	104	1205/1	2	אורן הצנובר	Pinus pinea	קליפת זרע	seed coat			1	BULK
NZN-186	NZN-172	Nitzana	A	104	1205	3	בלתי
NZN-186	NZN-172	Nitzana	A	104	1205/2	4	שזיפיים	Prunus subgen. Prunus/Cerasus	קליפת זרע	seed coat			1
NZN-187	NZN-173	Nitzana	A	104	1215/2	1	מורכבים להגדרה		מצעית פורה				1
NZN-187	NZN-173	Nitzana	A	104	1215/2	2	אורן הצנובר	Pinus pinea	קליפת זרע	seed coat			1
NZN-187	NZN-173	Nitzana	A	104	1215/2	3	זית - תופאחי?	Olea europaea	זרע	seed			1	ענק
NZN-187	NZN-173	Nitzana	A	104	1215/2	4	אפרסק	Prunus persica	קשוות גלעין	stone
NZN-187	NZN-173	Nitzana	A	104	1215/2	5	עצם ובלתי		עצם ובלתי					לא להתעסק
NZN-188	NZN-174	Nitzana	A	105	1243	1	שיטה?						2	רצנטי
NZN-189	NZN-175	Nitzana	A	105	1275/1	1	cf. Prunus	cf. Prunus					3
NZN-189	NZN-175	Nitzana	A	105	1275/1	2	בקיה/טופח		זרע				1
NZN-190	NZN-176	Nitzana	A	106	1257	1	cf. טופח ספרדי	cf. Lathyrus clymenum	זרע				1	הצורה מתאימה אך בשל השתמרות גרועה אין זכר להילום ועדשה
NZN-191	NZN-177	Nitzana	A	115	1391	1	אורן הצנובר	Pinus pinea	קליפת זרע	seed coat			1
NZN-191	NZN-177	Nitzana	A	115	1391/1	2	בלתי		זרע				1	אולי אנדוספרם של שקד
NZN-192	NZN-178	Nitzana	A	116	1354	1	בקיה/טופח						1
NZN-192	NZN-178	Nitzana	A	116	1354	2	כפיות שעירות?
NZN-193	NZN-179	Nitzana	A	119	1385	1	בקיים		זרע				2
NZN-194	NZN-180	Nitzana	A	125	1447/1	1	legumes		זרע				7
NZN-195	NZN-181	Nitzana	A	125	1448/1	1	legumes		זרע				6
NZN-196	NZN-182	Nitzana	A	128	1525	1	UN ID
NZN-196	NZN-182	Nitzana	A	128	1525	2	legumes		זרע				9	כנראה בקיה תרבותית
NZN-197	NZN-183	Nitzana	A	128	1526	1	legumes		זרע				2	עדשה+
NZN-198	NZN-184	Nitzana	A	129	1535/1	1	עדשה						1
NZN-199	NZN-185	Nitzana	B	202?	2007/2	1	insect for ID						1
NZN-200	NZN-186	Nitzana	B	206	2019/3	1	?אבטיח		זרע				9	soil-2,G-4117	לא מפוחם
NZN-201	NZN-187	Nitzana	B	213	2089/1	1							1
NZN-202	NZN-188	Nitzana	C	301	?	1	בקיים		זרע				3
NZN-203	NZN-189	Nitzana	C	301	3001/8	1	קטנית		פסיגים				1
NZN-204	NZN-190	Nitzana	C	301	3013/1	1	מורכבים להגדרה						1	להגדרה
NZN-205	NZN-191	Nitzana	C	301	3015/2	1	plants							soil-2,G-4117	רצנטי
NZN-205	NZN-191	Nitzana	C	301	3015/2	2	zilla+		זרע				3		חרקים
NZN-206	NZN-192	Nitzana	C	301	3025/2	1	פחם						1	light f.
NZN-207	NZN-193	Nitzana	C	303	3035/1	1	?		זרע?				2
NZN-208	NZN-194	Nitzana	C	306	3044/1	1	דבקה? + בקיי?		זרע				2
NZN-209	NZN-195	Nitzana	C	310	3081/1	1	עדשה?		זרע				1
NZN-210	NZN-196	Nitzana	E	501	5005	1	insect?fruit?						1
NZN-211	NZN-197	Nitzana	E	503	5027	1	בקיים +שעורת התבור		זרע				5
NZN-212	NZN-198	Nitzana	E	503	5034	1	בקיים + קליפה						4
NZN-213	NZN-199	Nitzana	E	503	5035	1	בקיים		זרע				3
NZN-214	NZN-200	Nitzana	E	503	5037	1	בלתי						1
NZN-215	NZN-201	Nitzana	E	503	5051	1	בקיים		זרע				2		אולי בקיה תרבותית
NZN-216	NZN-202	Nitzana	E	503	5052	1	בקיי		זרע				1
NZN-217	NZN-203	Nitzana	E	504	5071	1	בקיי+דגני		זרע				8
NZN-218	NZN-204	Nitzana	E	505	5081	1	עדשה		זרע				1
NZN-218	NZN-204	Nitzana	E	505	5081	2	חרוב		זרע				1
NZN-218	NZN-204	Nitzana	E	505	5081	3	?						1
NZN-219	NZN-205	Nitzana	E	507	5090	1	אורן הצנובר	Pinus pinea	קליפת זרע	seed coat			1
NZN-219	NZN-205	Nitzana	E	507	5090	1	בקיים		זרע
NZN-220	NZN-206	Nitzana	E	509	5107	1	כרשינה	Vicia ervilia	פסיגים				3
NZN-221	NZN-207	Nitzana	E	509	5108	1	טופח	Lathyrus sect. cicercula	זרע?				3
NZN-222	NZN-208	Nitzana	E	510	5115	1	עדשה	Lens culinaris	זרע?				4
NZN-223	NZN-209	Nitzana	E	511	5128	1			זרע?				1
NZN-224	NZN-210	Nitzana	E	512	5138	1	בקיים	Vicia ervilia	זרע?				1
NZN-225	NZN-211	Nitzana	E	514	5148	1	בקיים	Vicia ervilia	זרע				1
NZN-226	NZN-212	Nitzana	F	601	6002/1	1	שעורה	Hordeum	גרגיר	grain	Gramineae	דגניים	1
NZN-226	NZN-212	Nitzana	F	601	6002/1	2								להגדרה
NZN-226	NZN-212	Nitzana	F	601	6002/1	3	גפן	Vitis Vinifera	זרע	seed		גפניים	6
NZN-226	NZN-212	Nitzana	F	601	6002/1	4	אבטיח		זרע	seed			10+
